# Supplementary material for: Emergence of novel SARS-CoV-2 variants in the Netherlands
Source: PubMed Central journal article supplement (PMC7988010; doi:10.1038/s41598-021-85363-7), 2021-03-23
Supplement: 41598_2021_85363_MOESM3_ESM.pdf [file 41598_2021_85363_MOESM3_ESM.pdf]

Emergence of Novel SARS-CoV-2 Variants in the Netherlands- Supplementary File 2

Aysun Urhan1, Thomas Abeel1,2,\*

1 Delft Bioinformatics Lab, Delft University of Technology Van Mourik Broekmanweg 6, 2628 XE Delft, The Netherlands

2 Infectious Disease and Microbiome Program, Broad Institute of MIT and Harvard, 415 Main Street, Cambridge, MA 02142, USA

\* Corresponding author: t.abeel@tudelft.nl

We gratefully acknowledge the authors, originating and submitting laboratories of the sequences from GISAID's EpiFlu™ Database on which this research is based. The list is detailed below.

All submitters of data may be contacted directly via [www.gisaid.org](http://www.gisaid.org)

| Accession ID   | Virus name                      | Location                 | Collection date | Originating lab                                                                                        | Submitting lab                                                                                         | Authors                                                                                                                                                                                                                                                                                                                                                                                                                                                                |
|----------------|---------------------------------|--------------------------|-----------------|--------------------------------------------------------------------------------------------------------|--------------------------------------------------------------------------------------------------------|------------------------------------------------------------------------------------------------------------------------------------------------------------------------------------------------------------------------------------------------------------------------------------------------------------------------------------------------------------------------------------------------------------------------------------------------------------------------|
| EPI_ISL_406531 | hCoV-19/Guangdong/20SF174/2020  | Asia / China / Guangdong | 2020-01-22      | Zhuhai                                                                                                 | Guangdong Provincial Center for Diseases Control and Prevention; Guangdong Provincial Public Health    | Guangdong Provincial Center for Disease Control and Prevention Min Kang, Jie Wu, Jing Lu, Tao Liu, Baisheng Li, Shujiang Mei, Feng Ruan, Lifeng Lin, Changwen Ke, Haojie Zhong, Yingtao Zhang, Lirong Zou, Xuguang Chen, Qi Zhu, Jianpeng Xiao, Jianxiang Geng, Zhe Liu, Jianxiong Hu, Weilin Zeng, Xing Li, Yuhuang Liao, Xiujuan Tang, Songjian Xiao, Ying Wang, Yingchao Song, Xue Zhuang, Lijun Liang, Guanhao He, Huihong Deng, Tie Song, Jianfeng He, Wenjun Ma  |
| EPI_ISL_406533 | hCoV-19/Guangzhou/20SF206/2020  | Asia / China / Guangdong | 2020-01-22      | Guangzhou                                                                                              | Guangdong Provincial Center for Diseases Control and Prevention; Guangdong Provincial Public Health    | Guangdong Provincial Center for Diseases Control and Prevention Min Kang, Jie Wu, Jing Lu, Tao Liu, Baisheng Li, Shujiang Mei, Feng Ruan, Lifeng Lin, Changwen Ke, Haojie Zhong, Yingtao Zhang, Lirong Zou, Xuguang Chen, Qi Zhu, Jianpeng Xiao, Jianxiang Geng, Zhe Liu, Jianxiong Hu, Weilin Zeng, Xing Li, Yuhuang Liao, Xiujuan Tang, Songjian Xiao, Ying Wang, Yingchao Song, Xue Zhuang, Lijun Liang, Guanhao He, Huihong Deng, Tie Song, Jianfeng He, Wenjun Ma |
| EPI_ISL_406534 | hCoV-19/Foshan/20SF207/2020     | Asia / China / Guangdong | 2020-01-22      | Foshan                                                                                                 | Guangdong Provincial Center for Diseases Control and Prevention; Guangdong Provincial Public Health    | Guangdong Provincial Center for Diseases Control and Prevention Min Kang, Jie Wu, Jing Lu, Tao Liu, Baisheng Li, Shujiang Mei, Feng Ruan, Lifeng Lin, Changwen Ke, Haojie Zhong, Yingtao Zhang, Lirong Zou, Xuguang Chen, Qi Zhu, Jianpeng Xiao, Jianxiang Geng, Zhe Liu, Jianxiong Hu, Weilin Zeng, Xing Li, Yuhuang Liao, Xiujuan Tang, Songjian Xiao, Ying Wang, Yingchao Song, Xue Zhuang, Lijun Liang, Guanhao He, Huihong Deng, Tie Song, Jianfeng He, Wenjun Ma |
| EPI_ISL_406535 | hCoV-19/Foshan/20SF210/2020     | Asia / China / Guangdong | 2020-01-22      | Foshan                                                                                                 | Guangdong Provincial Center for Diseases Control and Prevention; Guangdong Provincial Public Health    | Guangdong Provincial Center for Diseases Control and Prevention Min Kang, Jie Wu, Jing Lu, Tao Liu, Baisheng Li, Shujiang Mei, Feng Ruan, Lifeng Lin, Changwen Ke, Haojie Zhong, Yingtao Zhang, Lirong Zou, Xuguang Chen, Qi Zhu, Jianpeng Xiao, Jianxiang Geng, Zhe Liu, Jianxiong Hu, Weilin Zeng, Xing Li, Yuhuang Liao, Xiujuan Tang, Songjian Xiao, Ying Wang, Yingchao Song, Xue Zhuang, Lijun Liang, Guanhao He, Huihong Deng, Tie Song, Jianfeng He, Wenjun Ma |
| EPI_ISL_406536 | hCoV-19/Foshan/20SF211/2020     | Asia / China / Guangdong | 2020-01-22      | Foshan                                                                                                 | Guangdong Provincial Center for Diseases Control and Prevention; Guangdong Provincial Public Health    | Guangdong Provincial Center for Diseases Control and Prevention Min Kang, Jie Wu, Jing Lu, Tao Liu, Baisheng Li, Shujiang Mei, Feng Ruan, Lifeng Lin, Changwen Ke, Haojie Zhong, Yingtao Zhang, Lirong Zou, Xuguang Chen, Qi Zhu, Jianpeng Xiao, Jianxiang Geng, Zhe Liu, Jianxiong Hu, Weilin Zeng, Xing Li, Yuhuang Liao, Xiujuan Tang, Songjian Xiao, Ying Wang, Yingchao Song, Xue Zhuang, Lijun Liang, Guanhao He, Huihong Deng, Tie Song, Jianfeng He, Wenjun Ma |
| EPI_ISL_406538 | hCoV-19/Guangdong/20SF201/2020  | Asia / China / Guangdong | 2020-01-23      | Guangdong                                                                                              | Provincial Center for Diseases Control and Prevention; Guangdong Provincial Institute of Public Health | Guangdong Provincial Center for Diseases Control and Prevention Min Kang, Jie Wu, Jing Lu, Tao Liu, Baisheng Li, Shujiang Mei, Feng Ruan, Lifeng Lin, Changwen Ke, Haojie Zhong, Yingtao Zhang, Lirong Zou, Xuguang Chen, Qi Zhu, Jianpeng Xiao, Jianxiang Geng, Zhe Liu, Jianxiong Hu, Weilin Zeng, Xing Li, Yuhuang Liao, Xiujuan Tang, Songjian Xiao, Ying Wang, Yingchao Song, Xue Zhuang, Lijun Liang, Guanhao He, Huihong Deng, Tie Song, Jianfeng He, Wenjun Ma |
| EPI_ISL_413513 | hCoV-19/South Korea/KUMC03/2020 | Asia / South Korea       | 2020-02-27      | Division of Infectious Diseases, Department of Internal Medicine, Korea University College of Medicine | Department of Microbiology, Institute for Viral Diseases, College of Medicine, Korea University        | Changmin Kang, Joon-Yong Bae, Jungmin Lee, Jin Gu Yoon, Heedo Park, Juyoung Cho, Jeonghun Kim, Gee Eun Lee, Cui Chunguang, Kyeong-ryeol Shin, Ji Yun Noh, Joon Young Song, Hee Jin Cheong, Woo Joo Kim, Jin Il Kim, Man-Seong Park                                                                                                                                                                                                                                     |
| EPI_ISL_413514 | hCoV-19/South Korea/KUMC04/2020 | Asia / South Korea       | 2020-02-27      | Department of Microbiology, Institute for Viral Diseases, College of Medicine, Korea University        | Department of Microbiology, Institute for Viral Diseases, College of Medicine, Korea University        | Changmin Kang, Joon-Yong Bae, Jungmin Lee, Jin Gu Yoon, Heedo Park, Juyoung Cho, Jeonghun Kim, Gee Eun Lee, Cui Chunguang, Kyeong-ryeol Shin, Ji Yun Noh, Joon Young Song, Hee Jin Cheong, Woo Joo Kim, Jin Il Kim, Man-Seong Park                                                                                                                                                                                                                                     |
| EPI_ISL_413515 | hCoV-19/South Korea/KUMC05/2020 | Asia / South Korea       | 2020-02-27      | Division of Infectious Diseases, Department of Internal Medicine, Korea University College of Medicine | Department of Microbiology, Institute for Viral Diseases, College of Medicine, Korea University        | Changmin Kang, Joon-Yong Bae, Jungmin Lee, Jin Gu Yoon, Heedo Park, Juyoung Cho, Jeonghun Kim, Gee Eun Lee, Cui Chunguang, Kyeong-ryeol Shin, Ji Yun Noh, Joon Young Song, Hee Jin Cheong, Woo Joo Kim, Jin Il Kim, Man-Seong Park                                                                                                                                                                                                                                     |

EPI\_ISL\_413516 hCoV-19/South Korea/KUMC06/2020 Asia / South Korea 2020-02-27 Department of Microbiology, Institute for Viral Diseases, College of Medicine, Korea University Department of Microbiology, Institute for Viral Diseases, College of Medicine, Korea University Changmin Kang, Joon-Yong Bae, Jungmin Lee, Jin Gu Yoon, Heedo Park, Juyoung Cho, Jeonghun Kim, Gee Eun Lee, Cui Chunguang, Kyeong-ryeol Shin, Ji Yun Noh, Joon Young Song, Hee Jin Cheong, Woo Joo Kim, Jin Il Kim, Man-Seong Park

EPI\_ISL\_413518 hCoV-19/Beijing/105/2020 Asia / China / Beijing 2020-01-26 unknown Infectious Disease Control Center Li,J., Li,L., Li,Z., Qiu,S., Song,H., Li,P. and Li,P.

EPI\_ISL\_413519 hCoV-19/Beijing/231/2020 Asia / China / Beijing 2020-01-28 unknown Infectious Disease Control Center Li,J., Li,L., Li,Z., Qiu,S., Song,H., Li,P. and Li,P.

EPI\_ISL\_413520 hCoV-19/Beijing/233/2020 Asia / China / Beijing 2020-01-28 unknown Infectious Disease Control Center Li,J., Li,L., Li,Z., Qiu,S., Song,H., Li,P. and Li,P.

EPI\_ISL\_413521 hCoV-19/Beijing/235/2020 Asia / China / Beijing 2020-01-28 unknown Infectious Disease Control Center Li,J., Li,L., Li,Z., Qiu,S., Song,H., Li,P. and Li,P.

EPI\_ISL\_413522 hCoV-19/India/1-27/2020 Asia / India / Kerala 2020-01-27 Indian Council of Medical Research - National Institute of Virology National Influenza Center, Indian Council of Medical Research - National Institute of Virology Potdar V, Yadav PD, Choudhary ML, Shete-Aich A

EPI\_ISL\_413523 hCoV-19/India/1-31/2020 Asia / India / Kerala 2020-01-31 Indian Council of Medical Research-National Institute of Virology National Influenza Center, Indian Council of Medical Research-National Institute of Virology Potdar V, Yadav PD, Choudhary ML, Shete-Aich A

EPI\_ISL\_413555 hCoV-19/Wales/PHW1/2020 Europe / United Kingdom / Wales 2020-02-27 Wales Specialist Virology Centre Public Health Wales Microbiology Cardiff Catherine Moore, Cen Sabu, Joanne Watkins, Sally Corden, Tom Connor

EPI\_ISL\_413556 hCoV-19/Wales/PHW2/2020 Europe / United Kingdom / Wales 2020-03-04 Wales Specialist Virology Centre Public Health Wales Microbiology Cardiff Catherine Moore, Tim Jones, Joanne Watkins, Sally Corden, Tom Connor

EPI\_ISL\_413557 hCoV-19/USA/CA-CDPH-UC1/2020 North America / USA / California / Sonoma County 2020-02-28 California Department of Public Health Chiu Laboratory, University of California, San Francisco Xianding Deng, Scot Federman, Chao-Yang Pan, Hugo Guevara,Wei Gu, Debra A. Wadford, and Charles Y. Chiu

EPI\_ISL\_413558 hCoV-19/USA/CA-CDPH-UC2/2020 North America / USA / California / Solano County 2020-02-27 California Department of Public Health Chiu Laboratory, University of California, San Francisco Xianding Deng, Scot Federman, Chao-Yang Pan, Hugo Guevara,Wei Gu, Debra A. Wadford, and Charles Y. Chiu

EPI\_ISL\_413559 hCoV-19/USA/CA-CDPH-UC3/2020 North America / USA / California / Solano County 2020-02-27 California Department of Public Health Chiu Laboratory, University of California, San Francisco Xianding Deng, Scot Federman, Chao-Yang Pan, Hugo Guevara,Wei Gu, Debra A. Wadford, and Charles Y. Chiu

EPI\_ISL\_413560 hCoV-19/USA/WA-S3/2020 North America / USA / Washington 2020-02-28 Seattle Flu Study Seattle Flu Study Chu et al

EPI\_ISL\_413561 hCoV-19/USA/CA-CDPH-UC4/2020 North America / USA / California / Solano County 2020-02-27 California Department of Public Health Chiu Laboratory, University of California, San Francisco Xianding Deng, Scot Federman, Chao-Yang Pan, Hugo Guevara,Wei Gu, Debra A. Wadford, and Charles Y. Chiu

EPI\_ISL\_413562 hCoV-19/USA/WA11-UW7/2020 North America / USA / Washington 2020-03-02 UW Virology Lab UW Virology Lab Pavitra Roychoudhury, Hong Xie, Keith Jerome, Alexander Greninger

EPI\_ISL\_413563 hCoV-19/USA/WA12-UW8/2020 North America / USA / Washington 2020-03-03 UW Virology Lab UW Virology Lab Pavitra Roychoudhury, Hong Xie, Keith Jerome, Alexander Greninger

EPI\_ISL\_413564 hCoV-19/Netherlands/Andel\_1365066/2020 Europe / Netherlands / Andel 2020-03-01 MHC West-Brabant Erasmus Medical Center David Nieuwenhuijse, Bas Oude Munnink, Reina Sikkema, Claudia Schapendonk, Irina Chestakova, Anne van der Linden, Mark Pronk, Pascal Lexmond, Corien Swaan, Manon Haverkate, Madelief Mollers, Mart Stein, Sandra Kengne Kamga Mobou, Jeroen van Kampen, Jolanda Voermans, Aura Timen, Corine GeurtsvanKessel, Annemiek van der Eijk, Richard Molenkamp, Marion Koopmans, on behalf of the Dutch national COVID-19 response team.

EPI\_ISL\_413566 hCoV-19/Netherlands/Blaricum\_1364780/2020 Europe / Netherlands / Blaricum 2020-03-02 MHC Gooi & Vechtstreek Erasmus Medical Center David Nieuwenhuijse, Bas Oude Munnink, Reina Sikkema, Claudia Schapendonk, Irina Chestakova, Anne van der Linden, Mark Pronk, Pascal Lexmond, Corien Swaan, Manon Haverkate, Madelief Mollers, Mart Stein, Sandra Kengne Kamga Mobou, Jeroen van Kampen, Jolanda Voermans, Aura Timen, Corine GeurtsvanKessel, Annemiek van der Eijk, Richard Molenkamp, Marion Koopmans, on behalf of the Dutch national COVID-19 response team.

EPI\_ISL\_413568 hCoV-19/Netherlands/Dalen\_1363624/2020 Europe / Netherlands / Dalen 2020-03-01 MHC Drenthe Erasmus Medical Center David Nieuwenhuijse, Bas Oude Munnink, Reina Sikkema, Claudia Schapendonk, Irina Chestakova, Anne van der Linden, Mark Pronk, Pascal Lexmond, Corien Swaan, Manon Haverkate, Madelief Mollers, Mart Stein, Sandra Kengne Kamga Mobou, Jeroen van Kampen, Jolanda Voermans, Aura Timen, Corine GeurtsvanKessel, Annemiek van der Eijk, Richard Molenkamp, Marion Koopmans, on behalf of the Dutch national COVID-19 response team.

EPI\_ISL\_413571 hCoV-19/Netherlands/Eindhoven\_1363782/2020 Europe / Netherlands / Eindhoven 2020-03-02 MHC Brabant Zuidoost Erasmus Medical Center David Nieuwenhuijse, Bas Oude Munnink, Reina Sikkema, Claudia Schapendonk, Irina Chestakova, Anne van der Linden, Mark Pronk, Pascal Lexmond, Corien Swaan, Manon Haverkate, Madelief Mollers, Mart Stein, Sandra Kengne Kamga Mobou, Jeroen van Kampen, Jolanda Voermans, Aura Timen, Corine GeurtsvanKessel, Annemiek van der Eijk, Richard Molenkamp, Marion Koopmans, on behalf of the Dutch national COVID-19 response team.

EPI\_ISL\_413572 hCoV-19/Netherlands/Haarlem\_1363688/2020 Europe / Netherlands / Haarlem 2020-03-01 MHC Kennemerland Erasmus Medical Center David Nieuwenhuijse, Bas Oude Munnink, Reina Sikkema, Claudia Schapendonk, Irina Chestakova, Anne van der Linden, Mark Pronk, Pascal Lexmond, Corien Swaan, Manon Haverkate,

Madelief Mollers, Mart Stein, Sandra Kengne Kamga Mobou, Jeroen van Kampen, Jolanda Voermans, Aura Timen, Corine GeurtsvanKessel, Annemiek van der Eijk, Richard Molenkamp, Marion Koopmans, on behalf of the Dutch national COVID-19 response team.

EPI\_ISL\_413573 hCoV-19/Netherlands/Hardinxveld\_Giessendam\_1364806/2020 Europe / Netherlands / Hardinxveld Giessendam 2020-03-02 Dienst Gezondheid & Jeugd Zuid-Holland Zuid Erasmus Medical Center David Nieuwenhuijse, Bas Oude Munnink, Reina Sikkema, Claudia Schapendonk, Irina Chestakova, Anne van der Linden, Mark Pronk, Pascal Lexmond, Corien Swaan, Manon Haverkate, Madelief Mollers, Mart Stein, Sandra Kengne Kamga Mobou, Jeroen van Kampen, Jolanda Voermans, Aura Timen, Corine GeurtsvanKessel, Annemiek van der Eijk, Richard Molenkamp, Marion Koopmans, on behalf of the Dutch national COVID-19 response team.

EPI\_ISL\_413574 hCoV-19/Netherlands/Helmond\_1363548/2020 Europe / Netherlands / Helmond 2020-02-29 MHC West-Brabant Erasmus Medical Center David Nieuwenhuijse, Bas Oude Munnink, Reina Sikkema, Claudia Schapendonk, Irina Chestakova, Anne van der Linden, Mark Pronk, Pascal Lexmond, Corien Swaan, Manon Haverkate, Madelief Mollers, Mart Stein, Sandra Kengne Kamga Mobou, Jeroen van Kampen, Jolanda Voermans, Aura Timen, Corine GeurtsvanKessel, Annemiek van der Eijk, Richard Molenkamp, Marion Koopmans, on behalf of the Dutch national COVID-19 response team.

EPI\_ISL\_413577 hCoV-19/Netherlands/Naarden\_1364774/2020 Europe / Netherlands / Naarden 2020-03-02 MHC Gooi & Vechtstreek Erasmus Medical Center David Nieuwenhuijse, Bas Oude Munnink, Reina Sikkema, Claudia Schapendonk, Irina Chestakova, Anne van der Linden, Mark Pronk, Pascal Lexmond, Corien Swaan, Manon Haverkate, Madelief Mollers, Mart Stein, Sandra Kengne Kamga Mobou, Jeroen van Kampen, Jolanda Voermans, Aura Timen, Corine GeurtsvanKessel, Annemiek van der Eijk, Richard Molenkamp, Marion Koopmans, on behalf of the Dutch national COVID-19 response team.

EPI\_ISL\_413579 hCoV-19/Netherlands/Nootdorp\_1364222/2020 Europe / Netherlands / Nootdorp 2020-03-03 MHC Haaglanden Erasmus Medical Center David Nieuwenhuijse, Bas Oude Munnink, Reina Sikkema, Claudia Schapendonk, Irina Chestakova, Anne van der Linden, Mark Pronk, Pascal Lexmond, Corien Swaan, Manon Haverkate, Madelief Mollers, Mart Stein, Sandra Kengne Kamga Mobou, Jeroen van Kampen, Jolanda Voermans, Aura Timen, Corine GeurtsvanKessel, Annemiek van der Eijk, Richard Molenkamp, Marion Koopmans, on behalf of the Dutch national COVID-19 response team.

EPI\_ISL\_413580 hCoV-19/Netherlands/Oisterwijk\_1364072/2020 Europe / Netherlands / Oisterwijk 2020-03-02 MHC Hart voor Brabant Erasmus Medical Center David Nieuwenhuijse, Bas Oude Munnink, Reina Sikkema, Claudia Schapendonk, Irina Chestakova, Anne van der Linden, Mark Pronk, Pascal Lexmond, Corien Swaan, Manon Haverkate, Madelief Mollers, Mart Stein, Sandra Kengne Kamga Mobou, Jeroen van Kampen, Jolanda Voermans, Aura Timen, Corine GeurtsvanKessel, Annemiek van der Eijk, Richard Molenkamp, Marion Koopmans, on behalf of the Dutch national COVID-19 response team.

EPI\_ISL\_413582 hCoV-19/Netherlands/Rotterdam\_1363790/2020 Europe / Netherlands / Rotterdam 2020-03-01 ErasmusMC Erasmus Medical Center David Nieuwenhuijse, Bas Oude Munnink, Reina Sikkema, Claudia Schapendonk, Irina Chestakova, Anne van der Linden, Mark Pronk, Pascal Lexmond, Corien Swaan, Manon Haverkate, Madelief Mollers, Mart Stein, Sandra Kengne Kamga Mobou, Jeroen van Kampen, Jolanda Voermans, Aura Timen, Corine GeurtsvanKessel, Annemiek van der Eijk, Richard Molenkamp, Marion Koopmans, on behalf of the Dutch national COVID-19 response team.

EPI\_ISL\_413583 hCoV-19/Netherlands/Rotterdam\_1364040/2020 Europe / Netherlands / Rotterdam 2020-03-02 MHC Rotterdam-Rijnmond Erasmus Medical Center David Nieuwenhuijse, Bas Oude Munnink, Reina Sikkema, Claudia Schapendonk, Irina Chestakova, Anne van der Linden, Mark Pronk, Pascal Lexmond, Corien Swaan, Manon Haverkate, Madelief Mollers, Mart Stein, Sandra Kengne Kamga Mobou, Jeroen van Kampen, Jolanda Voermans, Aura Timen, Corine GeurtsvanKessel, Annemiek van der Eijk, Richard Molenkamp, Marion Koopmans, on behalf of the Dutch national COVID-19 response team.

EPI\_ISL\_413584 hCoV-19/Netherlands/Rotterdam\_1364740/2020 Europe / Netherlands / Rotterdam 2020-03-03 unknown Erasmus Medical Center David Nieuwenhuijse, Bas Oude Munnink, Reina Sikkema, Claudia Schapendonk, Irina Chestakova, Anne van der Linden, Mark Pronk, Pascal Lexmond, Corien Swaan, Manon Haverkate, Madelief Mollers, Mart Stein, Sandra Kengne Kamga Mobou, Jeroen van Kampen, Jolanda Voermans, Aura Timen, Corine GeurtsvanKessel, Annemiek van der Eijk, Richard Molenkamp, Marion Koopmans, on behalf of the Dutch national COVID-19 response team.

EPI\_ISL\_413587 hCoV-19/Netherlands/Tilburg\_1364286/2020 Europe / Netherlands / Tilburg 2020-03-03 Foundation Elisabeth-Tweesteden Ziekenhuis Erasmus Medical Center David Nieuwenhuijse, Bas Oude Munnink, Reina Sikkema, Claudia Schapendonk, Irina Chestakova, Anne van der Linden, Mark Pronk, Pascal Lexmond, Corien Swaan, Manon Haverkate, Madelief Mollers, Mart Stein, Sandra Kengne Kamga Mobou, Jeroen van Kampen, Jolanda Voermans, Aura Timen, Corine GeurtsvanKessel, Annemiek van der Eijk, Richard Molenkamp, Marion Koopmans, on behalf of the Dutch national COVID-19 response team.

EPI\_ISL\_413588 hCoV-19/Netherlands/Utrecht\_1363564/2020 Europe / Netherlands / Utrecht 2020-03-01 MHC Utrecht Erasmus Medical Center David Nieuwenhuijse, Bas Oude Munnink, Reina Sikkema, Claudia Schapendonk, Irina Chestakova, Anne van der Linden, Mark Pronk, Pascal Lexmond, Corien Swaan, Manon Haverkate, Madelief Mollers, Mart Stein, Sandra Kengne Kamga Mobou, Jeroen van Kampen, Jolanda Voermans, Aura Timen, Corine GeurtsvanKessel, Annemiek van der Eijk, Richard Molenkamp, Marion Koopmans, on behalf of the Dutch national COVID-19 response team.

EPI\_ISL\_413589 hCoV-19/Netherlands/Utrecht\_1363628/2020 Europe / Netherlands / Utrecht 2020-03-01 MHC Utrecht Erasmus Medical Center David Nieuwenhuijse, Bas Oude Munnink, Reina Sikkema, Claudia Schapendonk, Irina Chestakova, Anne van der Linden, Mark Pronk, Pascal Lexmond, Corien Swaan, Manon Haverkate, Madelief Mollers, Mart Stein, Sandra Kengne Kamga Mobou, Jeroen van Kampen, Jolanda Voermans, Aura Timen, Corine GeurtsvanKessel, Annemiek van der Eijk, Richard Molenkamp, Marion Koopmans, on behalf of the Dutch national COVID-19 response team.

EPI\_ISL\_413590 hCoV-19/Netherlands/Utrecht\_1364066/2020 Europe / Netherlands / Utrecht 2020-03-02

MHC Utrecht Erasmus Medical Center David Nieuwenhuijse, Bas Oude Munnink, Reina Sikkema, Claudia Schapendonk, Irina Chestakova, Anne van der Linden, Mark Pronk, Pascal Lexmond, Corien Swaan, Manon Haverkate, Madelief Mollers, Mart Stein, Sandra Kengne Kamga Mobou, Jeroen van Kampen, Jolanda Voermans, Aura Timen, Corine GeurtsvanKessel, Annemiek van der Eijk, Richard Molenkamp, Marion Koopmans, on behalf of the Dutch national COVID-19 response team.

EPI\_ISL\_413591 hCoV-19/Netherlands/Zeewolde\_1365080/2020 Europe / Netherlands / Zeewolde 2020-03-02  
MHC Flevoland Erasmus Medical Center David Nieuwenhuijse, Bas Oude Munnink, Reina Sikkema, Claudia Schapendonk, Irina Chestakova, Anne van der Linden, Mark Pronk, Pascal Lexmond, Corien Swaan, Manon Haverkate, Madelief Mollers, Mart Stein, Sandra Kengne Kamga Mobou, Jeroen van Kampen, Jolanda Voermans, Aura Timen, Corine GeurtsvanKessel, Annemiek van der Eijk, Richard Molenkamp, Marion Koopmans, on behalf of the Dutch national COVID-19 response team.

EPI\_ISL\_413592 hCoV-19/Taiwan/NTU03/2020 Asia / Taiwan / Taipei 2020-03-02 Department of Laboratory Medicine, National Taiwan University Hospital Microbial Genomics Core Lab, National Taiwan University Centers of Genomic and Precision Medicine Shiou-Hwei Yeh, You-Yu Lin, Ya-Yun Lai, Chiao-Ling Li, Shan-Chwen Chang, Pei-Jer Chen, Sui-Yuan Chang

EPI\_ISL\_413593 hCoV-19/Luxembourg/Lux1/2020 Europe / Luxembourg 2020-02-29 Laboratoire National de Santé Erasmus Medical Center David Nieuwenhuijse, Bas Oude Munnink, Reina Sikkema, Claudia Schapendonk, Irina Chestakova, Anne van der Linden, Mark Pronk, Pascal Lexmond, T. Abdelrahman, G. Fournier, J. Mossong, T. Nguyen, Jeroen van Kampen, Jolanda Voermans, Corine GeurtsvanKessel, Annemiek van der Eijk, Richard Molenkamp, Marion Koopmans, on behalf of the Dutch national COVID-19 response team.

EPI\_ISL\_413594 hCoV-19/Australia/NSW08/2020 Oceania / Australia / NSW / Sydney 2020-02-28 Centre for Infectious Diseases and Microbiology Laboratory Services NSW Health Pathology - Institute of Clinical Pathology and Medical Research; Westmead Hospital; University of Sydney Rockett R, Eden J-S, Lam C, Gray K, Timms, V, Gall, M, Alicia, A, Carter I, Rahman H, Holmes EC, O'Sullivan MV, Sintchenko V, Chen SC, Maddocks S, Kok J and Dwyer DE for the 2019-nCoV Study Group\*

EPI\_ISL\_413595 hCoV-19/Australia/NSW09/2020 Oceania / Australia / NSW / Sydney 2020-02-28 Centre for Infectious Diseases and Microbiology Laboratory Services NSW Health Pathology - Institute of Clinical Pathology and Medical Research; Westmead Hospital; University of Sydney Rockett R, Eden J-S, Lam C, Gray K, Timms, V, Gall, M, Carter I, Rahman H, Holmes EC, O'Sullivan MV, Sintchenko V, Chen SC, Maddocks S, Kok J and Dwyer DE for the 2019-nCoV Study Group\*

EPI\_ISL\_413596 hCoV-19/Australia/NSW10/2020 Oceania / Australia / NSW / Sydney 2020-02-28 Centre for Infectious Diseases and Microbiology - Public Health NSW Health Pathology - Institute of Clinical Pathology and Medical Research; Westmead Hospital; University of Sydney Rockett R, Eden J-S, Lam C, Gray K, Timms, V, Gall, M, Carter I, Rahman H, Holmes EC, O'Sullivan MV, Sintchenko V, Chen SC, Maddocks S, Kok J and Dwyer DE for the 2019-nCoV Study Group\*

EPI\_ISL\_413597 hCoV-19/Australia/NSW11/2020 Oceania / Australia / NSW / Sydney 2020-03-02 Centre for Infectious Diseases and Microbiology- Public Health NSW Health Pathology - Institute of Clinical Pathology and Medical Research; Westmead Hospital; University of Sydney Lam C, Eden J-S, Rockett R, Gray K, Timms, V, Gall, M, Carter I, Rahman H, Holmes EC, O'Sullivan MV, Sintchenko V, Chen SC, Maddocks S, Kok J and Dwyer DE for the 2019-nCoV Study Group\*

EPI\_ISL\_413598 hCoV-19/Australia/NSW12/2020 Oceania / Australia / NSW / Sydney 2020-03-04 Centre for Infectious Diseases and Microbiology - Public Health NSW Health Pathology - Institute of Clinical Pathology and Medical Research; Westmead Hospital; University of Sydney Gray K, Eden J-S, Lam C, Rockett R, Timms, V, Gall, M, Carter I, Rahman H, Holmes EC, O'Sullivan MV, Sintchenko V, Chen SC, Maddocks S, Kok J and Dwyer DE for the 2019-nCoV Study Group\*

EPI\_ISL\_413599 hCoV-19/Australia/NSW13/2020 Oceania / Australia / NSW / Sydney 2020-03-04 Centre for Infectious Diseases and Microbiology - Public Health NSW Health Pathology - Institute of Clinical Pathology and Medical Research; Westmead Hospital; University of Sydney Timms, V, Eden J-S, Lam C, Gray K, Rockett R, Gall, M, Carter I, Rahman H, Holmes EC, O'Sullivan MV, Sintchenko V, Chen SC, Maddocks S, Kok J and Dwyer DE for the 2019-nCoV Study Group\*

EPI\_ISL\_413600 hCoV-19/Australia/NSW14/2020 Oceania / Australia / NSW / Sydney 2020-03-03 Centre for Infectious Diseases and Microbiology - Public Health NSW Health Pathology - Institute of Clinical Pathology and Medical Research; Westmead Hospital; University of Sydney Gall, M, Eden J-S, Lam C, Gray K, Timms, V, Rockett R, Carter I, Rahman H, Holmes EC, O'Sullivan MV, Sintchenko V, Chen SC, Maddocks S, Kok J and Dwyer DE for the 2019-nCoV Study Group\*

EPI\_ISL\_413601 hCoV-19/USA/WA13-UW9/2020 North America / USA / Washington 2020-03-02 UW Virology Lab UW Virology Lab Pavitra Roychoudhury, Hong Xie, Keith Jerome, Alexander Greninger

EPI\_ISL\_413711 hCoV-19/China/WF0014/2020 Asia / China 2020-02 Weifang Center for Disease Control and Prevention & BGI-Shenzhen Qing Nie, Xingguang Li, Erik M Volz, Han Fu, Haowei Wang, Xiaoyue Xi, Wei Chen, Dehui Liu, Yingying Chen, Mengmeng Tian, Wei Tan, Junjie Zai, Wanying Sun, Jiandong Li, Junhua Li

EPI\_ISL\_417091 hCoV-19/USA/WA-S38/2020 North America / USA / Washington / Snohomish County 2020-03-04 Washington State Department of Health Seattle Flu Study Chu etl al

EPI\_ISL\_417092 hCoV-19/USA/WA-S39/2020 North America / USA / Washington / Snohomish County 2020-03-04 Washington State Department of Health Seattle Flu Study Chu etl al

EPI\_ISL\_417093 hCoV-19/USA/WA-S40/2020 North America / USA / Washington / Snohomish County 2020-02-28 Washington State Department of Health Seattle Flu Study Chu etl al

EPI\_ISL\_417095 hCoV-19/USA/WA-S42/2020 North America / USA / Washington / King County 2020-02-28 Washington State Department of Health Seattle Flu Study Chu etl al

EPI\_ISL\_417096 hCoV-19/USA/WA-S43/2020 North America / USA / Washington 2020-02-27 Washington





|                                       |                                    |                                                                                                                             |                                                                                                                                                                                                                                                                                                                                                                                                                                                                               |                                                                                        |
|---------------------------------------|------------------------------------|-----------------------------------------------------------------------------------------------------------------------------|-------------------------------------------------------------------------------------------------------------------------------------------------------------------------------------------------------------------------------------------------------------------------------------------------------------------------------------------------------------------------------------------------------------------------------------------------------------------------------|----------------------------------------------------------------------------------------|
| Washington State Department of Health | Seattle                            | Flu Study                                                                                                                   | Chu etl al                                                                                                                                                                                                                                                                                                                                                                                                                                                                    |                                                                                        |
| EPI_ISL_417171                        | hCoV-19/USA/WA-S118/2020           | North America / USA / Washington                                                                                            | King County                                                                                                                                                                                                                                                                                                                                                                                                                                                                   | 2020-03-01                                                                             |
| Washington State Department of Health | Seattle                            | Flu Study                                                                                                                   | Chu etl al                                                                                                                                                                                                                                                                                                                                                                                                                                                                    |                                                                                        |
| EPI_ISL_417172                        | hCoV-19/USA/WA-S119/2020           | North America / USA / Washington                                                                                            | King County                                                                                                                                                                                                                                                                                                                                                                                                                                                                   | 2020-02-29                                                                             |
| Washington State Department of Health | Seattle                            | Flu Study                                                                                                                   | Chu etl al                                                                                                                                                                                                                                                                                                                                                                                                                                                                    |                                                                                        |
| EPI_ISL_417175                        | hCoV-19/USA/WA-S122/2020           | North America / USA / Washington                                                                                            | Grant County                                                                                                                                                                                                                                                                                                                                                                                                                                                                  | 2020-03-02                                                                             |
| Washington State Department of Health | Seattle                            | Flu Study                                                                                                                   | Chu etl al                                                                                                                                                                                                                                                                                                                                                                                                                                                                    |                                                                                        |
| EPI_ISL_417176                        | hCoV-19/Hong Kong/HKPU1_2101/2020  | Asia / Hong Kong                                                                                                            | 2020-01-21                                                                                                                                                                                                                                                                                                                                                                                                                                                                    | Department of Pathology, Princess Margaret Hospital                                    |
|                                       |                                    | Department of Health Technology and Informatics, Faculty of Health and Social Science, The Hong Kong Polytechnic University | Kenneth Siu-Sing LEUNG, Timothy Ting-Leung NG, Alan Ka-Lun WU, Miranda Chong-Yee YAU, Hiu-Yin LAO, Ming-Pan CHOI, Kingsley King-Gee TAM, Lam-Kwong LEE, Barry Kin-Chung WONG, Alex Yat-Man HO, Kam-Tong Yip, Kwok-Cheung LUNG, Raymond Wai-To LIU, Eugene Yuk-Keung TSO, Wai-Shing LEUNG, Man-Chun CHAN, Yuk-Yung NG, Kit-Man SIN, Kitty Sau-Chun FUNG, Sandy Ka-Yee CHAU, Wing-Kin TO, Tak-Lun Que, David Ho-Keung SHUM, Shea Ping YIP, Wing Cheong YAM, Gilman Kit-Hang SIU |                                                                                        |
| EPI_ISL_417178                        | hCoV-19/Hong Kong/HKPU6_2101/2020  | Asia / Hong Kong                                                                                                            | 2020-01-25                                                                                                                                                                                                                                                                                                                                                                                                                                                                    | Department of Pathology, Princess Margaret Hospital                                    |
|                                       |                                    | Department of Health Technology and Informatics, Faculty of Health and Social Science, The Hong Kong Polytechnic University | Kenneth Siu-Sing LEUNG, Timothy Ting-Leung NG, Alan Ka-Lun WU, Miranda Chong-Yee YAU, Hiu-Yin LAO, Ming-Pan CHOI, Kingsley King-Gee TAM, Lam-Kwong LEE, Barry Kin-Chung WONG, Alex Yat-Man HO, Kam-Tong Yip, Kwok-Cheung LUNG, Raymond Wai-To LIU, Eugene Yuk-Keung TSO, Wai-Shing LEUNG, Man-Chun CHAN, Yuk-Yung NG, Kit-Man SIN, Kitty Sau-Chun FUNG, Sandy Ka-Yee CHAU, Wing-Kin TO, Tak-Lun Que, David Ho-Keung SHUM, Shea Ping YIP, Wing Cheong YAM, Gilman Kit-Hang SIU |                                                                                        |
| EPI_ISL_417181                        | hCoV-19/Hong Kong/HKPU19_0402/2020 | Asia / Hong Kong                                                                                                            | 2020-02-05                                                                                                                                                                                                                                                                                                                                                                                                                                                                    | Department of Pathology, United Christian Hospital                                     |
|                                       |                                    | Department of Health Technology and Informatics, Faculty of Health and Social Science, The Hong Kong Polytechnic University | Kenneth Siu-Sing LEUNG, Timothy Ting-Leung NG, Alan Ka-Lun WU, Miranda Chong-Yee YAU, Hiu-Yin LAO, Ming-Pan CHOI, Kingsley King-Gee TAM, Lam-Kwong LEE, Barry Kin-Chung WONG, Alex Yat-Man HO, Kam-Tong Yip, Kwok-Cheung LUNG, Raymond Wai-To LIU, Eugene Yuk-Keung TSO, Wai-Shing LEUNG, Man-Chun CHAN, Yuk-Yung NG, Kit-Man SIN, Kitty Sau-Chun FUNG, Sandy Ka-Yee CHAU, Wing-Kin TO, Tak-Lun Que, David Ho-Keung SHUM, Shea Ping YIP, Wing Cheong YAM, Gilman Kit-Hang SIU |                                                                                        |
| EPI_ISL_417185                        | hCoV-19/Hong Kong/HKPU28_3001/2020 | Asia / Hong Kong                                                                                                            | 2020-02-09                                                                                                                                                                                                                                                                                                                                                                                                                                                                    | Department of Pathology, United Christian Hospital                                     |
|                                       |                                    | Department of Health Technology and Informatics, Faculty of Health and Social Science, The Hong Kong Polytechnic University | Kenneth Siu-Sing LEUNG, Timothy Ting-Leung NG, Alan Ka-Lun WU, Miranda Chong-Yee YAU, Hiu-Yin LAO, Ming-Pan CHOI, Kingsley King-Gee TAM, Lam-Kwong LEE, Barry Kin-Chung WONG, Alex Yat-Man HO, Kam-Tong Yip, Kwok-Cheung LUNG, Raymond Wai-To LIU, Eugene Yuk-Keung TSO, Wai-Shing LEUNG, Man-Chun CHAN, Yuk-Yung NG, Kit-Man SIN, Kitty Sau-Chun FUNG, Sandy Ka-Yee CHAU, Wing-Kin TO, Tak-Lun Que, David Ho-Keung SHUM, Shea Ping YIP, Wing Cheong YAM, Gilman Kit-Hang SIU |                                                                                        |
| EPI_ISL_417186                        | hCoV-19/South Africa/R03006/2020   | Africa / South Africa / KZN                                                                                                 | 2020-03-07                                                                                                                                                                                                                                                                                                                                                                                                                                                                    | National Institute for Communicable Diseases of the National Health Laboratory Service |
|                                       |                                    | National Institute for Communicable Diseases of the National Health Laboratory Service                                      | Allam M, Kwenda S, van Heusden P, Khumalo Z, Mohale T, Subramoney K, von Gottberg, A, Ismail A, Bhiman JN                                                                                                                                                                                                                                                                                                                                                                     |                                                                                        |
| EPI_ISL_417187                        | hCoV-19/Hong Kong/HKPU29_0102/2020 | Asia / Hong Kong                                                                                                            | 2020-02-08                                                                                                                                                                                                                                                                                                                                                                                                                                                                    | Department of Clinical Pathology, Pamela Youde Nethersole Eastern Hospital             |
|                                       |                                    | Department of Health Technology and Informatics, Faculty of Health and Social Science, The Hong Kong Polytechnic University | Kenneth Siu-Sing LEUNG, Timothy Ting-Leung NG, Alan Ka-Lun WU, Miranda Chong-Yee YAU, Hiu-Yin LAO, Ming-Pan CHOI, Kingsley King-Gee TAM, Lam-Kwong LEE, Barry Kin-Chung WONG, Alex Yat-Man HO, Kam-Tong Yip, Kwok-Cheung LUNG, Raymond Wai-To LIU, Eugene Yuk-Keung TSO, Wai-Shing LEUNG, Man-Chun CHAN, Yuk-Yung NG, Kit-Man SIN, Kitty Sau-Chun FUNG, Sandy Ka-Yee CHAU, Wing-Kin TO, Tak-Lun Que, David Ho-Keung SHUM, Shea Ping YIP, Wing Cheong YAM, Gilman Kit-Hang SIU |                                                                                        |
| EPI_ISL_417188                        | hCoV-19/Hong Kong/HKPU30_2901/2020 | Asia / Hong Kong                                                                                                            | 2020-02-08                                                                                                                                                                                                                                                                                                                                                                                                                                                                    | Department of Clinical Pathology, Pamela Youde Nethersole Eastern Hospital             |
|                                       |                                    | Department of Health Technology and Informatics, Faculty of Health and Social Science, The Hong Kong Polytechnic University | Kenneth Siu-Sing LEUNG, Timothy Ting-Leung NG, Alan Ka-Lun WU, Miranda Chong-Yee YAU, Hiu-Yin LAO, Ming-Pan CHOI, Kingsley King-Gee TAM, Lam-Kwong LEE, Barry Kin-Chung WONG, Alex Yat-Man HO, Kam-Tong Yip, Kwok-Cheung LUNG, Raymond Wai-To LIU, Eugene Yuk-Keung TSO, Wai-Shing LEUNG, Man-Chun CHAN, Yuk-Yung NG, Kit-Man SIN, Kitty Sau-Chun FUNG, Sandy Ka-Yee CHAU, Wing-Kin TO, Tak-Lun Que, David Ho-Keung SHUM, Shea Ping YIP, Wing Cheong YAM, Gilman Kit-Hang SIU |                                                                                        |
| EPI_ISL_417191                        | hCoV-19/USA/MN5-MDH5/2020          | North America / USA / Minnesota                                                                                             | 2020-03-10                                                                                                                                                                                                                                                                                                                                                                                                                                                                    | Minnesota Department of Health, Public Health Laboratory                               |
|                                       |                                    | Minnesota Department of Health, Public Health Laboratory                                                                    | Matt Plumb, Jake Garfin and Xiong Wang                                                                                                                                                                                                                                                                                                                                                                                                                                        |                                                                                        |
| EPI_ISL_417192                        | hCoV-19/USA/MN25-MDH25/2020        | North America / USA / Minnesota                                                                                             | 2020-03-12                                                                                                                                                                                                                                                                                                                                                                                                                                                                    | Minnesota Department of Health, Public Health Laboratory                               |
|                                       |                                    | Minnesota Department of Health, Public Health Laboratory                                                                    | Matt Plumb, Jake Garfin and Xiong Wang                                                                                                                                                                                                                                                                                                                                                                                                                                        |                                                                                        |
| EPI_ISL_417193                        | hCoV-19/Hong Kong/HKPU32_0402/2020 | Asia / Hong Kong                                                                                                            | 2020-02-09                                                                                                                                                                                                                                                                                                                                                                                                                                                                    | Department of Clinical Pathology, Pamela Youde Nethersole Eastern Hospital             |
|                                       |                                    | Department of Health Technology and Informatics, Faculty of Health and Social Science, The Hong Kong Polytechnic University | Kenneth Siu-Sing LEUNG, Timothy Ting-Leung NG, Alan Ka-Lun WU, Miranda Chong-Yee YAU, Hiu-Yin LAO, Ming-Pan CHOI, Kingsley King-Gee TAM, Lam-Kwong LEE, Barry Kin-Chung WONG, Alex Yat-Man HO, Kam-Tong Yip, Kwok-Cheung LUNG, Raymond Wai-To LIU, Eugene Yuk-Keung TSO, Wai-Shing LEUNG, Man-Chun CHAN, Yuk-Yung NG, Kit-Man SIN, Kitty Sau-Chun FUNG, Sandy Ka-Yee CHAU, Wing-Kin TO, Tak-Lun Que, David Ho-Keung SHUM, Shea Ping YIP, Wing Cheong YAM, Gilman Kit-Hang SIU |                                                                                        |
| EPI_ISL_417194                        | hCoV-19/USA/MN26-MDH26/2020        | North America / USA / Minnesota                                                                                             | 2020-03-12                                                                                                                                                                                                                                                                                                                                                                                                                                                                    | Minnesota Department of Health, Public Health Laboratory                               |
|                                       |                                    | Minnesota Department of Health, Public Health Laboratory                                                                    | Matt Plumb, Jake Garfin and Xiong Wang                                                                                                                                                                                                                                                                                                                                                                                                                                        |                                                                                        |
| EPI_ISL_417196                        | hCoV-19/USA/MN29-MDH29/2020        | North America / USA / Minnesota                                                                                             | 2020-03-11                                                                                                                                                                                                                                                                                                                                                                                                                                                                    | Minnesota Department of Health, Public Health Laboratory                               |

Department of Health, Public Health Laboratory Minnesota Department of Health, Public Health Laboratory  
Matt Plumb, Jake Garfin and Xiong Wang

EPI\_ISL\_417197 hCoV-19/Hong Kong/HKPU34\_3001/2020 Asia / Hong Kong 2020-02-09 Department of  
Clinical Pathology, Pamela Youde Nethersole Eastern Hospital Department of Health Technology and  
Informatics, Faculty of Health and Social Science, The Hong Kong Polytechnic University Kenneth Siu-Sing LEUNG,  
Timothy Ting-Leung NG, Alan Ka-Lun WU, Miranda Chong-Yee YAU, Hiu-Yin LAO, Ming-Pan CHOI, Kingsley King-Gee  
TAM, Lam-Kwong LEE, Barry Kin-Chung WONG, Alex Yat-Man HO, Kam-Tong Yip, Kwok-Cheung LUNG, Raymond Wai-To LIU,  
Eugene Yuk-Keung TSO, Wai-Shing LEUNG, Man-Chun CHAN, Yuk-Yung NG, Kit-Man SIN, Kitty Sau-Chun FUNG, Sandy Ka-  
Yee CHAU, Wing-Kin TO, Tak-Lun Que, David Ho-Keung SHUM, Shea Ping YIP, Wing Cheong YAM, Gilman Kit-Hang SIU  
EPI\_ISL\_417250 hCoV-19/England/20108004702/2020 Europe / United Kingdom / England 2020-03-02  
Respiratory Virus Unit, Microbiology Services Colindale, Public Health England Respiratory Virus Unit,  
Microbiology Services Colindale, Public Health England Monica Galiano, Shahjahan Miah, Angie Lackenby, Omolola  
Akinbami, Tiina Talts, Leena Bhaw, Richard Myers, Steven Platt, Kirstin Edwards, Jonathan Hubb, Joanna Ellis,  
Maria Zambon  
EPI\_ISL\_417252 hCoV-19/England/20108006003/2020 Europe / United Kingdom / England 2020-03-05  
Respiratory Virus Unit, Microbiology Services Colindale, Public Health England Respiratory Virus Unit,  
Microbiology Services Colindale, Public Health England Monica Galiano, Shahjahan Miah, Angie Lackenby, Omolola  
Akinbami, Tiina Talts, Leena Bhaw, Richard Myers, Steven Platt, Kirstin Edwards, Jonathan Hubb, Joanna Ellis,  
Maria Zambon  
EPI\_ISL\_417254 hCoV-19/England/20108006802/2020 Europe / United Kingdom / England 2020-03-04  
Respiratory Virus Unit, Microbiology Services Colindale, Public Health England Respiratory Virus Unit,  
Microbiology Services Colindale, Public Health England Monica Galiano, Shahjahan Miah, Angie Lackenby, Omolola  
Akinbami, Tiina Talts, Leena Bhaw, Richard Myers, Steven Platt, Kirstin Edwards, Jonathan Hubb, Joanna Ellis,  
Maria Zambon  
EPI\_ISL\_417255 hCoV-19/England/20108007002/2020 Europe / United Kingdom / England 2020-03-04  
Respiratory Virus Unit, Microbiology Services Colindale, Public Health England Respiratory Virus Unit,  
Microbiology Services Colindale, Public Health England Monica Galiano, Shahjahan Miah, Angie Lackenby, Omolola  
Akinbami, Tiina Talts, Leena Bhaw, Richard Myers, Steven Platt, Kirstin Edwards, Jonathan Hubb, Joanna Ellis,  
Maria Zambon  
EPI\_ISL\_417256 hCoV-19/England/20108007302/2020 Europe / United Kingdom / England 2020-03-03  
Respiratory Virus Unit, Microbiology Services Colindale, Public Health England Respiratory Virus Unit,  
Microbiology Services Colindale, Public Health England Monica Galiano, Shahjahan Miah, Angie Lackenby, Omolola  
Akinbami, Tiina Talts, Leena Bhaw, Richard Myers, Steven Platt, Kirstin Edwards, Jonathan Hubb, Joanna Ellis,  
Maria Zambon  
EPI\_ISL\_417258 hCoV-19/England/20108034006/2020 Europe / United Kingdom / England 2020-03-06  
Respiratory Virus Unit, Microbiology Services Colindale, Public Health England Respiratory Virus Unit,  
Microbiology Services Colindale, Public Health England Monica Galiano, Shahjahan Miah, Angie Lackenby, Omolola  
Akinbami, Tiina Talts, Leena Bhaw, Richard Myers, Steven Platt, Kirstin Edwards, Jonathan Hubb, Joanna Ellis,  
Maria Zambon  
EPI\_ISL\_417260 hCoV-19/England/20109035906/2020 Europe / United Kingdom / England 2020-03-05  
Respiratory Virus Unit, Microbiology Services Colindale, Public Health England Respiratory Virus Unit,  
Microbiology Services Colindale, Public Health England Monica Galiano, Shahjahan Miah, Angie Lackenby, Omolola  
Akinbami, Tiina Talts, Leena Bhaw, Richard Myers, Steven Platt, Kirstin Edwards, Jonathan Hubb, Joanna Ellis,  
Maria Zambon  
EPI\_ISL\_417262 hCoV-19/England/20109039306/2020 Europe / United Kingdom / England 2020-03-06  
Respiratory Virus Unit, Microbiology Services Colindale, Public Health England Respiratory Virus Unit,  
Microbiology Services Colindale, Public Health England Monica Galiano, Shahjahan Miah, Angie Lackenby, Omolola  
Akinbami, Tiina Talts, Leena Bhaw, Richard Myers, Steven Platt, Kirstin Edwards, Jonathan Hubb, Joanna Ellis,  
Maria Zambon  
EPI\_ISL\_417263 hCoV-19/England/20109050106/2020 Europe / United Kingdom / England 2020-03-06  
Respiratory Virus Unit, Microbiology Services Colindale, Public Health England Respiratory Virus Unit,  
Microbiology Services Colindale, Public Health England Monica Galiano, Shahjahan Miah, Angie Lackenby, Omolola  
Akinbami, Tiina Talts, Leena Bhaw, Richard Myers, Steven Platt, Kirstin Edwards, Jonathan Hubb, Joanna Ellis,  
Maria Zambon  
EPI\_ISL\_417264 hCoV-19/England/20109050306/2020 Europe / United Kingdom / England 2020-03-04  
Respiratory Virus Unit, Microbiology Services Colindale, Public Health England Respiratory Virus Unit,  
Microbiology Services Colindale, Public Health England Monica Galiano, Shahjahan Miah, Angie Lackenby, Omolola  
Akinbami, Tiina Talts, Leena Bhaw, Richard Myers, Steven Platt, Kirstin Edwards, Jonathan Hubb, Joanna Ellis,  
Maria Zambon  
EPI\_ISL\_417265 hCoV-19/England/20109050406/2020 Europe / United Kingdom / England 2020-03-08  
Respiratory Virus Unit, Microbiology Services Colindale, Public Health England Respiratory Virus Unit,  
Microbiology Services Colindale, Public Health England Monica Galiano, Shahjahan Miah, Angie Lackenby, Omolola  
Akinbami, Tiina Talts, Leena Bhaw, Richard Myers, Steven Platt, Kirstin Edwards, Jonathan Hubb, Joanna Ellis,  
Maria Zambon  
EPI\_ISL\_417266 hCoV-19/England/20109050506/2020 Europe / United Kingdom / England 2020-03-05  
Respiratory Virus Unit, Microbiology Services Colindale, Public Health England Respiratory Virus Unit,  
Microbiology Services Colindale, Public Health England Monica Galiano, Shahjahan Miah, Angie Lackenby, Omolola  
Akinbami, Tiina Talts, Leena Bhaw, Richard Myers, Steven Platt, Kirstin Edwards, Jonathan Hubb, Joanna Ellis,  
Maria Zambon  
EPI\_ISL\_417267 hCoV-19/England/20109050606/2020 Europe / United Kingdom / England 2020-03-05







Faculty of Medicine, University of Helsinki, Helsinki, Finland Teemu Smura, Hannimari Kallio-Kokko, Olli Vapalahti

EPI\_ISL\_418408 hCoV-19/Finland/14M32/2020 Europe / Finland / Helsinki 2020-03-14 Department of Virology and Immunology, University of Helsinki and Helsinki University Hospital, Huslab Finland  
Department of Virology, Faculty of Medicine, University of Helsinki, Helsinki, Finland Teemu Smura, Hannimari Kallio-Kokko, Olli Vapalahti

EPI\_ISL\_418409 hCoV-19/Finland/14M74/2020 Europe / Finland / Helsinki 2020-03-14 Department of Virology and Immunology, University of Helsinki and Helsinki University Hospital, Huslab Finland  
Department of Virology, Faculty of Medicine, University of Helsinki, Helsinki, Finland Teemu Smura, Hannimari Kallio-Kokko, Olli Vapalahti

EPI\_ISL\_418410 hCoV-19/Finland/14M77/2020 Europe / Finland / Helsinki 2020-03-14 Department of Virology and Immunology, University of Helsinki and Helsinki University Hospital, Huslab Finland  
Department of Virology, Faculty of Medicine, University of Helsinki, Helsinki, Finland Teemu Smura, Hannimari Kallio-Kokko, Olli Vapalahti

EPI\_ISL\_418411 hCoV-19/Finland/14M82/2020 Europe / Finland / Helsinki 2020-03-14 Department of Virology and Immunology, University of Helsinki and Helsinki University Hospital, Huslab Finland  
Department of Virology, Faculty of Medicine, University of Helsinki, Helsinki, Finland Teemu Smura, Hannimari Kallio-Kokko, Olli Vapalahti

EPI\_ISL\_418412 hCoV-19/France/ARA094100/2020 Europe / France / ARA / Privas 2020-03-15 Centre Hospitalier des Vals d'Ardeche CNR Virus des Infections Respiratoires - France SUD Antonin Bal, Gregory Destras, Gwendolyne Burfin, Solenne Brun, Carine Moustaud, Raphaelle Lamy, Alexandre Gaynard, Maude Bouscambert-Duchamp, Florence Morfin-Sherpa, Martine Valette, Bruno Lina, Laurence Josset

EPI\_ISL\_418413 hCoV-19/France/ARA09428/2020 Europe / France / ARA / Macon 2020-03-15 Centre Hospitalier de Macon CNR Virus des Infections Respiratoires - France SUD Antonin Bal, Gregory Destras, Gwendolyne Burfin, Solenne Brun, Carine Moustaud, Raphaelle Lamy, Alexandre Gaynard, Maude Bouscambert-Duchamp, Florence Morfin-Sherpa, Martine Valette, Bruno Lina, Laurence Josset

EPI\_ISL\_418414 hCoV-19/France/ARA09434/2020 Europe / France / ARA / Valence 2020-03-15 Centre Hospitalier de Valence CNR Virus des Infections Respiratoires - France SUD Antonin Bal, Gregory Destras, Gwendolyne Burfin, Solenne Brun, Carine Moustaud, Raphaelle Lamy, Alexandre Gaynard, Maude Bouscambert-Duchamp, Florence Morfin-Sherpa, Martine Valette, Bruno Lina, Laurence Josset

EPI\_ISL\_418416 hCoV-19/France/ARA09588/2020 Europe / France / ARA / Venissieux 2020-03-16 GH Les Portes du Sud CNR Virus des Infections Respiratoires - France SUD Antonin Bal, Gregory Destras, Gwendolyne Burfin, Solenne Brun, Carine Moustaud, Raphaelle Lamy, Alexandre Gaynard, Maude Bouscambert-Duchamp, Florence Morfin-Sherpa, Martine Valette, Bruno Lina, Laurence Josset

EPI\_ISL\_418417 hCoV-19/France/ARA09686/2020 Europe / France / ARA / Valence 2020-03-16 Centre Hospitalier de Valence CNR Virus des Infections Respiratoires - France SUD Antonin Bal, Gregory Destras, Gwendolyne Burfin, Solenne Brun, Carine Moustaud, Raphaelle Lamy, Alexandre Gaynard, Maude Bouscambert-Duchamp, Florence Morfin-Sherpa, Martine Valette, Bruno Lina, Laurence Josset

EPI\_ISL\_418418 hCoV-19/France/ARA10163/2020 Europe / France / ARA / Lyon 2020-03-16 Centre Hospitalier Saint Joseph Saint Luc CNR Virus des Infections Respiratoires - France SUD Antonin Bal, Gregory Destras, Gwendolyne Burfin, Solenne Brun, Carine Moustaud, Raphaelle Lamy, Alexandre Gaynard, Maude Bouscambert-Duchamp, Florence Morfin-Sherpa, Martine Valette, Bruno Lina, Laurence Josset

EPI\_ISL\_418419 hCoV-19/France/ARA10165/2020 Europe / France / ARA / Lyon 2020-03-16 Centre Hospitalier Saint Joseph Saint Luc CNR Virus des Infections Respiratoires - France SUD Antonin Bal, Gregory Destras, Gwendolyne Burfin, Solenne Brun, Carine Moustaud, Raphaelle Lamy, Alexandre Gaynard, Maude Bouscambert-Duchamp, Florence Morfin-Sherpa, Martine Valette, Bruno Lina, Laurence Josset

EPI\_ISL\_418420 hCoV-19/France/ARA10170/2020 Europe / France / ARA / Lyon 2020-03-17 Institut des Agents Infectieux (IAI), Hospices Civils de Lyon CNR Virus des Infections Respiratoires - France SUD Antonin Bal, Gregory Destras, Gwendolyne Burfin, Solenne Brun, Carine Moustaud, Raphaelle Lamy, Alexandre Gaynard, Maude Bouscambert-Duchamp, Florence Morfin-Sherpa, Martine Valette, Bruno Lina, Laurence Josset

EPI\_ISL\_418422 hCoV-19/France/ARA10184/2020 Europe / France / ARA / Lyon 2020-03-17 Institut des Agents Infectieux (IAI), Hospices Civils de Lyon CNR Virus des Infections Respiratoires - France SUD Antonin Bal, Gregory Destras, Gwendolyne Burfin, Solenne Brun, Carine Moustaud, Raphaelle Lamy, Alexandre Gaynard, Maude Bouscambert-Duchamp, Florence Morfin-Sherpa, Martine Valette, Bruno Lina, Laurence Josset

EPI\_ISL\_418423 hCoV-19/France/ARA10188/2020 Europe / France / ARA / Lyon 2020-03-17 Institut des Agents Infectieux (IAI), Hospices Civils de Lyon CNR Virus des Infections Respiratoires - France SUD Antonin Bal, Gregory Destras, Gwendolyne Burfin, Solenne Brun, Carine Moustaud, Raphaelle Lamy, Alexandre Gaynard, Maude Bouscambert-Duchamp, Florence Morfin-Sherpa, Martine Valette, Bruno Lina, Laurence Josset

EPI\_ISL\_418424 hCoV-19/France/ARA10189/2020 Europe / France / ARA / Lyon 2020-03-17 Institut des Agents Infectieux (IAI), Hospices Civils de Lyon CNR Virus des Infections Respiratoires - France SUD Antonin Bal, Gregory Destras, Gwendolyne Burfin, Solenne Brun, Carine Moustaud, Raphaelle Lamy, Alexandre Gaynard, Maude Bouscambert-Duchamp, Florence Morfin-Sherpa, Martine Valette, Bruno Lina, Laurence Josset

EPI\_ISL\_418425 hCoV-19/France/ARA10192/2020 Europe / France / ARA / Lyon 2020-03-17 Institut des Agents Infectieux (IAI), Hospices Civils de Lyon CNR Virus des Infections Respiratoires - France SUD Antonin Bal, Gregory Destras, Gwendolyne Burfin, Solenne Brun, Carine Moustaud, Raphaelle Lamy, Alexandre Gaynard, Maude Bouscambert-Duchamp, Florence Morfin-Sherpa, Martine Valette, Bruno Lina, Laurence Josset

EPI\_ISL\_418426 hCoV-19/France/ARA10251/2020 Europe / France / ARA / Bourg-en-Bresse 2020-03-17 Centre Hospitalier de Bourg en Bresse CNR Virus des Infections Respiratoires - France SUD Antonin Bal, Gregory Destras, Gwendolyne Burfin, Solenne Brun, Carine Moustaud, Raphaelle Lamy, Alexandre Gaynard, Maude Bouscambert-Duchamp, Florence Morfin-Sherpa, Martine Valette, Bruno Lina, Laurence Josset

EPI\_ISL\_418421 hCoV-19/France/ARA10257/2020 Europe / France / ARA / Saint-Priest 2020-03-17 Hopital Privé de l'Est Lyonnais CNR Virus des Infections Respiratoires - France SUD Antonin Bal, Gregory Destras, Gwendolyne Burfin, Solenne Brun, Carine Moustaud, Raphaëlle Lamy, Alexandre Gaymard, Maude Bouscambert-Duchamp, Florence Morfin-Sherpa, Martine Valette, Bruno Lina, Laurence Josset

EPI\_ISL\_418422 hCoV-19/France/ARA10282/2020 Europe / France / ARA / Vienne 2020-03-17 Centre Hospitalier Lucien Husseil CNR Virus des Infections Respiratoires - France SUD Antonin Bal, Gregory Destras, Gwendolyne Burfin, Solenne Brun, Carine Moustaud, Raphaëlle Lamy, Alexandre Gaymard, Maude Bouscambert-Duchamp, Florence Morfin-Sherpa, Martine Valette, Bruno Lina, Laurence Josset

EPI\_ISL\_418429 hCoV-19/France/ARA10876/2020 Europe / France / ARA / Lyon 2020-03-18 Institut des Agents Infectieux (IAI), Hospices Civils de Lyon CNR Virus des Infections Respiratoires - France SUD Antonin Bal, Gregory Destras, Gwendolyne Burfin, Solenne Brun, Carine Moustaud, Raphaëlle Lamy, Alexandre Gaymard, Maude Bouscambert-Duchamp, Florence Morfin-Sherpa, Martine Valette, Bruno Lina, Laurence Josset

EPI\_ISL\_418430 hCoV-19/France/ARA10910/2020 Europe / France / ARA / Lyon 2020-03-18 Institut des Agents Infectieux (IAI), Hospices Civils de Lyon CNR Virus des Infections Respiratoires - France SUD Antonin Bal, Gregory Destras, Gwendolyne Burfin, Solenne Brun, Carine Moustaud, Raphaëlle Lamy, Alexandre Gaymard, Maude Bouscambert-Duchamp, Florence Morfin-Sherpa, Martine Valette, Bruno Lina, Laurence Josset

EPI\_ISL\_418431 hCoV-19/France/ARA10968/2020 Europe / France / ARA / Lyon 2020-03-18 Institut des Agents Infectieux (IAI), Hospices Civils de Lyon CNR Virus des Infections Respiratoires - France SUD Antonin Bal, Gregory Destras, Gwendolyne Burfin, Solenne Brun, Carine Moustaud, Raphaëlle Lamy, Alexandre Gaymard, Maude Bouscambert-Duchamp, Florence Morfin-Sherpa, Martine Valette, Bruno Lina, Laurence Josset

EPI\_ISL\_418432 hCoV-19/France/ARA11036/2020 Europe / France / ARA / Lyon 2020-03-18 Institut des Agents Infectieux (IAI), Hospices Civils de Lyon CNR Virus des Infections Respiratoires - France SUD Antonin Bal, Gregory Destras, Gwendolyne Burfin, Solenne Brun, Carine Moustaud, Raphaëlle Lamy, Alexandre Gaymard, Maude Bouscambert-Duchamp, Florence Morfin-Sherpa, Martine Valette, Bruno Lina, Laurence Josset

EPI\_ISL\_418441 hCoV-19/Hangzhou/HZ48/2020 Asia / China / Hangzhou 2020-01-21 Hangzhou Center for Disease Control and Prevention Inspection Center of Hangzhou Center for Disease Control and Prevention Yu hua, Wang haoqiu, Li jun, Yu xinfeng, Pan jingcao

EPI\_ISL\_418442 hCoV-19/Hangzhou/HZ49/2020 Asia / China / Hangzhou 2020-01-21 Hangzhou Center for Disease Control and Prevention Inspection Center of Hangzhou Center for Disease Control and Prevention Yu hua, Wang haoqiu, Li jun, Yu xinfeng, Pan jingcao

EPI\_ISL\_418502 hCoV-19/Hangzhou/HZ60/2020 Asia / China / Hangzhou 2020-01-22 Hangzhou Center for Disease Control and Prevention Inspection Center of Hangzhou Center for Disease Control and Prevention Yu hua, Wang haoqiu, Li jun, Yu xinfeng, Pan jingcao

EPI\_ISL\_418503 hCoV-19/Hangzhou/HZ62/2020 Asia / China / Hangzhou 2020-01-22 Hangzhou Center for Disease Control and Prevention Inspection Center of Hangzhou Center for Disease Control and Prevention Yu hua, Wang haoqiu, Li jun, Yu xinfeng, Pan jingcao

EPI\_ISL\_418504 hCoV-19/Hangzhou/HZ79/2020 Asia / China / Hangzhou 2020-01-21 Hangzhou Center for Disease Control and Prevention Inspection Center of Hangzhou Center for Disease Control and Prevention Yu hua, Wang haoqiu, Li jun, Yu xinfeng, Pan jingcao

EPI\_ISL\_418506 hCoV-19/Hangzhou/HZ90/2020 Asia / China / Hangzhou 2020-01-21 Hangzhou Center for Disease Control and Prevention Inspection Center of Hangzhou Center for Disease Control and Prevention Yu hua, Wang haoqiu, Li jun, Yu xinfeng, Pan jingcao

EPI\_ISL\_418507 hCoV-19/Hangzhou/HZ91/2020 Asia/China/Zhejiang/Hangzhou 2020-01-21 Hangzhou Center for Disease Control and Prevention Inspection Center of Hangzhou Center for Disease Control and Prevention Yu hua, Wang haoqiu, Li jun, Yu xinfeng, Pan jingcao

EPI\_ISL\_418508 hCoV-19/Hangzhou/HZ162/2020 Asia / China / Zhejiang / Hangzhou 2020-01-23 Hangzhou Center for Disease Control and Prevention Inspection Center of Hangzhou Center for Disease Control and Prevention Yu hua, Wang haoqiu, Li jun, Yu xinfeng, Pan jingcao

EPI\_ISL\_418509 hCoV-19/Hangzhou/HZ178/2020 Asia / China / Zhejiang / Hangzhou 2020-01-23 Hangzhou Center for Disease Control and Prevention Inspection Center of Hangzhou Center for Disease Control and Prevention Yu hua, Wang haoqiu, Li jun, Yu xinfeng, Pan jingcao

EPI\_ISL\_418510 hCoV-19/Hangzhou/HZ185/2020 Asia / China / Hangzhou 2020-01-23 Hangzhou Center for Disease Control and Prevention Insepction Center of Hangzhou Center for Disease Control and Prevention Yu hua, Wang haoqiu, Li jun, Yu xinfeng, Pan jingcao

EPI\_ISL\_418511 hCoV-19/Hangzhou/HZ477/2020 Asia / China / Zhejiang / Hangzhou 2020-01-24 Hangzhou Center for Disease Control and Prevention Inspection Center of Hangzhou Center for Disease Control and Prevention Yu hua, Wang haoqiu, Li jun, Yu xinfeng, Pan jingcao

EPI\_ISL\_418512 hCoV-19/Hangzhou/HZ481/2020 Asia / China / Zhejiang / Hangzhou 2020-01-25 Hangzhou Center for Disease Control and Prevention Inspection Center of Hangzhou Center for Disease Control and Prevention Yu hua, Wang haoqiu, Li jun, Yu xinfeng, Pan jingcao

EPI\_ISL\_418513 hCoV-19/Hangzhou/HZ551/2020 Asia / China / Hangzhou 2020-01-25 Hangzhou Center for Disease Control and Prevention Inspection Center of Hangzhou Center for Disease Control and Prevention Yu hua, Wang haoqiu, Li jun, Yu xinfeng, Pan jingcao

EPI\_ISL\_418514 hCoV-19/Hangzhou/HZ576/2020 Asia / China / Zhejiang / Hangzhou 2020-01-25 Hangzhou Center for Disease Control and Prevention Inspection Center of Hangzhou Center for Disease Control and Prevention Yu hua, Wang haoqiu, Li jun, Yu xinfeng, Pan jingcao

EPI\_ISL\_418515 hCoV-19/Hangzhou/HZ638/2020 Asia / China / Hangzhou 2020-01-25 Hangzhou Center for Disease Control and Prevention Inspection Center of Hangzhou Center for Disease Control and Prevention Yu hua, Wang haoqiu, Li jun, Yu xinfeng, Pan jingcao

EPI\_ISL\_418516 hCoV-19/Ireland/21023/2020 Europe / Ireland / Tipperary 2020-03-06 UCD National

|                            |                                         |                                                                                                                                                                                                                                                                                                                                                                                                                                                                                                                                                                                 |
|----------------------------|-----------------------------------------|---------------------------------------------------------------------------------------------------------------------------------------------------------------------------------------------------------------------------------------------------------------------------------------------------------------------------------------------------------------------------------------------------------------------------------------------------------------------------------------------------------------------------------------------------------------------------------|
| Virus Reference Laboratory | UCD National Virus Reference Laboratory | Michael Carr, Gabriel Gonzalez, Jonathan Dean, Suzie Coughlan, Alison Murphy, Kevin Byrne, Ken Wolfe, Jeff Connell, Brendan Loftus, Cillian F De Gascun                                                                                                                                                                                                                                                                                                                                                                                                                         |
| EPI_ISL_418580             | hCoV-19/Ireland/Dublin-22361/2020       | Europe / Ireland / Cork 2020-03-08 UCD National Virus Reference Laboratory UCD National Virus Reference Laboratory Michael Carr, Gabriel Gonzalez, Jonathan Dean, Suzie Coughlan, Alison Murphy, Kevin Byrne, Ken Wolfe, Jeff Connell, Brendan Loftus, Cillian F De Gascun                                                                                                                                                                                                                                                                                                      |
| EPI_ISL_418581             | hCoV-19/Ireland/Dublin-22428/2020       | Europe / Ireland / Dublin 2020-03-08 UCD National Virus Reference Laboratory UCD National Virus Reference Laboratory Michael Carr, Gabriel Gonzalez, Jonathan Dean, Suzie Coughlan, Alison Murphy, Kevin Byrne, Ken Wolfe, Jeff Connell, Brendan Loftus, Cillian F De Gascun                                                                                                                                                                                                                                                                                                    |
| EPI_ISL_418582             | hCoV-19/Ireland/22901/2020              | Europe / Ireland / Louth 2020-03-10 UCD National Virus Reference Laboratory UCD National Virus Reference Laboratory Michael Carr, Gabriel Gonzalez, Jonathan Dean, Suzie Coughlan, Alison Murphy, Kevin Byrne, Ken Wolfe, Jeff Connell, Brendan Loftus, Cillian F De Gascun                                                                                                                                                                                                                                                                                                     |
| EPI_ISL_418583             | hCoV-19/Ireland/24042/2020              | Europe / Ireland / Dublin 2020-03-10 UCD National Virus Reference Laboratory UCD National Virus Reference Laboratory Michael Carr, Gabriel Gonzalez, Jonathan Dean, Suzie Coughlan, Alison Murphy, Kevin Byrne, Ken Wolfe, Jeff Connell, Brendan Loftus, Cillian F De Gascun                                                                                                                                                                                                                                                                                                    |
| EPI_ISL_418584             | hCoV-19/Ireland/24052/2020              | Europe / Ireland / Wicklow 2020-03-10 UCD National Virus Reference Laboratory UCD National Virus Reference Laboratory Michael Carr, Gabriel Gonzalez, Jonathan Dean, Suzie Coughlan, Alison Murphy, Kevin Byrne, Ken Wolfe, Jeff Connell, Brendan Loftus, Cillian F De Gascun                                                                                                                                                                                                                                                                                                   |
| EPI_ISL_419700             | hCoV-19/USA/NY-NYUMC39/2020             | North America / USA / New York / Manhattan 2020-03-18 NYU Langone Health Departments of Pathology and Medicine, New York University School of Medicine Maria Aguerro-Rosenfeld, Margaret Black, John Cadley, Paolo Cotzia, John Chen, Dacia Dimartino, Xiaojun Feng, Adriana Heguy, Megan Hogan, Emily Huang, George Jour, Christian Marier, Matthew T. Maurano, Mark J. Mulligan, Peter Meyn, Jared Pinnell, Sitharam Ramaswami, Amy Rapkiewicz, Marie Samanovic-Golden, Antonio Serrano, Guomiao Shen, Matija Snuderl, Nick Vulpescu, Gael Westby, Paul Zappile, Yutong Zhang |
| EPI_ISL_419702             | hCoV-19/USA/NY-NYUMC41/2020             | North America / USA / New York / Brooklyn 2020-03-18 NYU Langone Health Departments of Pathology and Medicine, New York University School of Medicine Maria Aguerro-Rosenfeld, Margaret Black, John Cadley, Paolo Cotzia, John Chen, Dacia Dimartino, Xiaojun Feng, Adriana Heguy, Megan Hogan, Emily Huang, George Jour, Christian Marier, Matthew T. Maurano, Mark J. Mulligan, Peter Meyn, Jared Pinnell, Sitharam Ramaswami, Amy Rapkiewicz, Marie Samanovic-Golden, Antonio Serrano, Guomiao Shen, Matija Snuderl, Nick Vulpescu, Gael Westby, Paul Zappile, Yutong Zhang  |
| EPI_ISL_419703             | hCoV-19/USA/NY-NYUMC42/2020             | North America / USA / New York / Manhattan 2020-03-18 NYU Langone Health Departments of Pathology and Medicine, New York University School of Medicine Maria Aguerro-Rosenfeld, Margaret Black, John Cadley, Paolo Cotzia, John Chen, Dacia Dimartino, Xiaojun Feng, Adriana Heguy, Megan Hogan, Emily Huang, George Jour, Christian Marier, Matthew T. Maurano, Mark J. Mulligan, Peter Meyn, Jared Pinnell, Sitharam Ramaswami, Amy Rapkiewicz, Marie Samanovic-Golden, Antonio Serrano, Guomiao Shen, Matija Snuderl, Nick Vulpescu, Gael Westby, Paul Zappile, Yutong Zhang |
| EPI_ISL_419704             | hCoV-19/USA/NY-NYUMC43/2020             | North America / USA / New York / Manhattan 2020-03-18 NYU Langone Health Departments of Pathology and Medicine, New York University School of Medicine Maria Aguerro-Rosenfeld, Margaret Black, John Cadley, Paolo Cotzia, John Chen, Dacia Dimartino, Xiaojun Feng, Adriana Heguy, Megan Hogan, Emily Huang, George Jour, Christian Marier, Matthew T. Maurano, Mark J. Mulligan, Peter Meyn, Jared Pinnell, Sitharam Ramaswami, Amy Rapkiewicz, Marie Samanovic-Golden, Antonio Serrano, Guomiao Shen, Matija Snuderl, Nick Vulpescu, Gael Westby, Paul Zappile, Yutong Zhang |
| EPI_ISL_419705             | hCoV-19/USA/NY-NYUMC44/2020             | North America / USA / New York / Manhattan 2020-03-18 NYU Langone Health Departments of Pathology and Medicine, New York University School of Medicine Maria Aguerro-Rosenfeld, Margaret Black, John Cadley, Paolo Cotzia, John Chen, Dacia Dimartino, Xiaojun Feng, Adriana Heguy, Megan Hogan, Emily Huang, George Jour, Christian Marier, Matthew T. Maurano, Mark J. Mulligan, Peter Meyn, Jared Pinnell, Sitharam Ramaswami, Amy Rapkiewicz, Marie Samanovic-Golden, Antonio Serrano, Guomiao Shen, Matija Snuderl, Nick Vulpescu, Gael Westby, Paul Zappile, Yutong Zhang |
| EPI_ISL_419706             | hCoV-19/USA/VA-DCLS-0012/2020           | North America / USA / Virginia 2020-03-10 Virginia DCLS Virginia DCLS                                                                                                                                                                                                                                                                                                                                                                                                                                                                                                           |
| EPI_ISL_419707             | hCoV-19/Spain/Cataluna201397/2020       | Europe / Spain / Catalonia 2020 HOSPITAL CLINIC Instituto de Salud Carlos III Iglesias-Caballero, M. Molinero Calamita, M. González-Esguevillas, M. Camarero S. Pozo F. Casas I. Jiménez, P. Jiménez, M. Zaballo, A. Monzón, S. Varona, S. Juliá, M. Cuesta, I. Marcos, M.A                                                                                                                                                                                                                                                                                                     |
| EPI_ISL_419708             | hCoV-19/USA/VA-DCLS-0014/2020           | North America / USA / Virginia 2020-03-12 Virginia DCLS Virginia DCLS                                                                                                                                                                                                                                                                                                                                                                                                                                                                                                           |
| EPI_ISL_419709             | hCoV-19/Spain/PaisVasco201602/2020      | Europe / Spain / BasqueCountry 2020-03-04 HOSPITAL TXAGORRITXU Instituto de Salud Carlos III Iglesias-Caballero, M. Molinero Calamita, M. González-Esguevillas, M. Camarero S. Pozo F. Casas I. Jiménez, P. Jiménez, M. Zaballo, A. Monzón, S. Varona, S. Juliá, M. Cuesta, I. Gómez, C.                                                                                                                                                                                                                                                                                        |
| EPI_ISL_419710             | hCoV-19/USA/VA-DCLS-0016/2020           | North America / USA / Virginia 2020-03-12 Virginia DCLS Virginia DCLS                                                                                                                                                                                                                                                                                                                                                                                                                                                                                                           |
| EPI_ISL_419711             | hCoV-19/USA/VA-DCLS-0017/2020           | North America / USA / Virginia 2020-03-11 Virginia DCLS Virginia DCLS                                                                                                                                                                                                                                                                                                                                                                                                                                                                                                           |
| EPI_ISL_419712             | hCoV-19/USA/VA-DCLS-0020/2020           | North America / USA / Virginia 2020-03-10 Virginia DCLS Virginia DCLS                                                                                                                                                                                                                                                                                                                                                                                                                                                                                                           |



















Maria Zambon  
 EPI\_ISL\_420758 hCoV-19/England/20140039604/2020 Europe / United Kingdom / England 2020-03-27  
 Respiratory Virus Unit, Microbiology Services Colindale, Public Health England Respiratory Virus Unit,  
 Microbiology Services Colindale, Public Health England Monica Galiano, Shahjahan Miah, Angie Lackenby, Omolola  
 Akinbami, Tiina Talts, Leena Bhaw, Richard Myers, Steven Platt, Kirstin Edwards, Jonathan Hubb, Joanna Ellis,  
 Maria Zambon

EPI\_ISL\_420761 hCoV-19/England/20140048704/2020 Europe / United Kingdom / England 2020-03-25  
 Respiratory Virus Unit, Microbiology Services Colindale, Public Health England Respiratory Virus Unit,  
 Microbiology Services Colindale, Public Health England Monica Galiano, Shahjahan Miah, Angie Lackenby, Omolola  
 Akinbami, Tiina Talts, Leena Bhaw, Richard Myers, Steven Platt, Kirstin Edwards, Jonathan Hubb, Joanna Ellis,  
 Maria Zambon

EPI\_ISL\_420765 hCoV-19/England/20142022504/2020 Europe / United Kingdom / England 2020-03-27  
 Respiratory Virus Unit, Microbiology Services Colindale, Public Health England Respiratory Virus Unit,  
 Microbiology Services Colindale, Public Health England Monica Galiano, Shahjahan Miah, Angie Lackenby, Omolola  
 Akinbami, Tiina Talts, Leena Bhaw, Richard Myers, Steven Platt, Kirstin Edwards, Jonathan Hubb, Joanna Ellis,  
 Maria Zambon

EPI\_ISL\_420766 hCoV-19/England/20142060404/2020 Europe / United Kingdom / England 2020-03-27  
 Respiratory Virus Unit, Microbiology Services Colindale, Public Health England Respiratory Virus Unit,  
 Microbiology Services Colindale, Public Health England Monica Galiano, Shahjahan Miah, Angie Lackenby, Omolola  
 Akinbami, Tiina Talts, Leena Bhaw, Richard Myers, Steven Platt, Kirstin Edwards, Jonathan Hubb, Joanna Ellis,  
 Maria Zambon

EPI\_ISL\_420767 hCoV-19/England/20142060804/2020 Europe / United Kingdom / England 2020-03-30  
 Respiratory Virus Unit, Microbiology Services Colindale, Public Health England Respiratory Virus Unit,  
 Microbiology Services Colindale, Public Health England Monica Galiano, Shahjahan Miah, Angie Lackenby, Omolola  
 Akinbami, Tiina Talts, Leena Bhaw, Richard Myers, Steven Platt, Kirstin Edwards, Jonathan Hubb, Joanna Ellis,  
 Maria Zambon

EPI\_ISL\_420772 hCoV-19/England/20142061804/2020 Europe / United Kingdom / England 2020-03-30  
 Respiratory Virus Unit, Microbiology Services Colindale, Public Health England Respiratory Virus Unit,  
 Microbiology Services Colindale, Public Health England Monica Galiano, Shahjahan Miah, Angie Lackenby, Omolola  
 Akinbami, Tiina Talts, Leena Bhaw, Richard Myers, Steven Platt, Kirstin Edwards, Jonathan Hubb, Joanna Ellis,  
 Maria Zambon

EPI\_ISL\_420773 hCoV-19/England/20142062204/2020 Europe / United Kingdom / England 2020-03-30  
 Respiratory Virus Unit, Microbiology Services Colindale, Public Health England Respiratory Virus Unit,  
 Microbiology Services Colindale, Public Health England Monica Galiano, Shahjahan Miah, Angie Lackenby, Omolola  
 Akinbami, Tiina Talts, Leena Bhaw, Richard Myers, Steven Platt, Kirstin Edwards, Jonathan Hubb, Joanna Ellis,  
 Maria Zambon

EPI\_ISL\_420774 hCoV-19/England/20142062604/2020 Europe / United Kingdom / England 2020-03-28  
 Respiratory Virus Unit, Microbiology Services Colindale, Public Health England Respiratory Virus Unit,  
 Microbiology Services Colindale, Public Health England Monica Galiano, Shahjahan Miah, Angie Lackenby, Omolola  
 Akinbami, Tiina Talts, Leena Bhaw, Richard Myers, Steven Platt, Kirstin Edwards, Jonathan Hubb, Joanna Ellis,  
 Maria Zambon

EPI\_ISL\_420775 hCoV-19/England/20142062904/2020 Europe / United Kingdom / England 2020-03-30  
 Respiratory Virus Unit, Microbiology Services Colindale, Public Health England Respiratory Virus Unit,  
 Microbiology Services Colindale, Public Health England Monica Galiano, Shahjahan Miah, Angie Lackenby, Omolola  
 Akinbami, Tiina Talts, Leena Bhaw, Richard Myers, Steven Platt, Kirstin Edwards, Jonathan Hubb, Joanna Ellis,  
 Maria Zambon

EPI\_ISL\_420784 hCoV-19/USA/AZ\_4811/2020 North America / USA / Arizona 2020-03-02 AZ Department  
 of Health Services Pathogen Discovery, Respiratory Viruses Branch, Division of Viral Diseases, Centers for  
 Disease Control and Prevention Krista Queen, Yan Li, Ying Tao, Jing Zhang, Anne Uehara, Clinton R. Paden,  
 Haibin Wang, Rachel Marine, Mary S. Keckler, Alison S. Laufer Halpin, Jasmine Padilla, Justin Lee, Christopher  
 A. Elkins, Suxiang Tong

EPI\_ISL\_420785 hCoV-19/USA/FL\_6318/2020 North America / USA / Florida 2020-03-02 FL Bureau of  
 Health Laboratories Tampa Pathogen Discovery, Respiratory Viruses Branch, Division of Viral Diseases,  
 Centers for Disease Control and Prevention Krista Queen, Yan Li, Ying Tao, Jing Zhang, Anne Uehara,  
 Clinton R. Paden, Haibin Wang, Rachel Marine, Mary S. Keckler, Alison S. Laufer Halpin, Jasmine Padilla, Justin  
 Lee, Christopher A. Elkins, Suxiang Tong

EPI\_ISL\_420786 hCoV-19/USA/GA\_1320/2020 North America / USA / Georgia 2020-03-03 GA Department  
 of Public Health Pathogen Discovery, Respiratory Viruses Branch, Division of Viral Diseases, Centers for  
 Disease Control and Prevention Krista Queen, Yan Li, Ying Tao, Jing Zhang, Anne Uehara, Clinton R. Paden,  
 Haibin Wang, Rachel Marine, Mary S. Keckler, Alison S. Laufer Halpin, Jasmine Padilla, Justin Lee, Christopher  
 A. Elkins, Suxiang Tong

EPI\_ISL\_420787 hCoV-19/USA/GA\_1299/2020 North America / USA / Georgia 2020-03-03 GA Department  
 of Public Health Pathogen Discovery, Respiratory Viruses Branch, Division of Viral Diseases, Centers for  
 Disease Control and Prevention Krista Queen, Yan Li, Ying Tao, Jing Zhang, Anne Uehara, Clinton R. Paden,  
 Haibin Wang, Rachel Marine, Mary S. Keckler, Alison S. Laufer Halpin, Jasmine Padilla, Justin Lee, Christopher  
 A. Elkins, Suxiang Tong

EPI\_ISL\_420788 hCoV-19/USA/GA\_1445/2020 North America / USA / Georgia 2020-03-04 GA Department  
 of Public Health Pathogen Discovery, Respiratory Viruses Branch, Division of Viral Diseases, Centers for  
 Disease Control and Prevention Krista Queen, Yan Li, Ying Tao, Jing Zhang, Anne Uehara, Clinton R. Paden,  
 Haibin Wang, Rachel Marine, Mary S. Keckler, Alison S. Laufer Halpin, Jasmine Padilla, Justin Lee, Christopher

A. Elkins, Suxiang Tong  
EPI\_ISL\_420789 hCoV-19/USA/IL\_1375/2020 North America / USA / Illinois 2020-03-01 Illinois  
Department of Public Health Chicago Laboratory Pathogen Discovery, Respiratory Viruses Branch, Division of  
Viral Diseases, Centers for Disease Control and Prevention Krista Queen, Yan Li, Ying Tao, Jing Zhang,  
Anne Uehara, Clinton R. Paden, Haibin Wang, Rachel Marine, Mary S. Keckler, Alison S. Laufer Halpin, Jasmine  
Padilla, Justin Lee, Christopher A. Elkins, Suxiang Tong

EPI\_ISL\_420790 hCoV-19/USA/IL\_1293/2020 North America / USA / Illinois 2020-03-01 Illinois  
Department of Public Health Chicago Laboratory Pathogen Discovery, Respiratory Viruses Branch, Division of  
Viral Diseases, Centers for Disease Control and Prevention Krista Queen, Yan Li, Ying Tao, Jing Zhang,  
Anne Uehara, Clinton R. Paden, Haibin Wang, Rachel Marine, Mary S. Keckler, Alison S. Laufer Halpin, Jasmine  
Padilla, Justin Lee, Christopher A. Elkins, Suxiang Tong

EPI\_ISL\_420791 hCoV-19/USA/NH\_0004/2020 North America / USA / New Hampshire 2020-02-29 NH  
Department of Health and Human Services Public Health Labs Pathogen Discovery, Respiratory Viruses Branch,  
Division of Viral Diseases, Centers for Disease Control and Prevention Krista Queen, Yan Li, Ying Tao, Jing  
Zhang, Anne Uehara, Clinton R. Paden, Haibin Wang, Rachel Marine, Mary S. Keckler, Alison S. Laufer Halpin,  
Jasmine Padilla, Justin Lee, Christopher A. Elkins, Suxiang Tong

EPI\_ISL\_420792 hCoV-19/USA/NH\_0008/2020 North America / USA / New Hampshire 2020-03-02 NH  
Department of Health and Human Services Public Health Labs Pathogen Discovery, Respiratory Viruses Branch,  
Division of Viral Diseases, Centers for Disease Control and Prevention Krista Queen, Yan Li, Ying Tao, Jing  
Zhang, Anne Uehara, Clinton R. Paden, Haibin Wang, Rachel Marine, Mary S. Keckler, Alison S. Laufer Halpin,  
Jasmine Padilla, Justin Lee, Christopher A. Elkins, Suxiang Tong

EPI\_ISL\_420793 hCoV-19/USA/NY\_2929/2020 North America / USA / New York 2020-03-02 NYC Department  
of Health and Mental Hygiene Pathogen Discovery, Respiratory Viruses Branch, Division of Viral Diseases,  
Centers for Disease Control and Prevention Krista Queen, Yan Li, Ying Tao, Jing Zhang, Anne Uehara,  
Clinton R. Paden, Haibin Wang, Rachel Marine, Mary S. Keckler, Alison S. Laufer Halpin, Jasmine Padilla, Justin  
Lee, Christopher A. Elkins, Suxiang Tong

EPI\_ISL\_420794 hCoV-19/USA/OR\_5430/2020 North America / USA / Oregon 2020-03-01 Oregon State  
Public Health- Virology section Pathogen Discovery, Respiratory Viruses Branch, Division of Viral Diseases,  
Centers for Disease Control and Prevention Krista Queen, Yan Li, Ying Tao, Jing Zhang, Anne Uehara,  
Clinton R. Paden, Haibin Wang, Rachel Marine, Mary S. Keckler, Alison S. Laufer Halpin, Jasmine Padilla, Justin  
Lee, Christopher A. Elkins, Suxiang Tong

EPI\_ISL\_420795 hCoV-19/USA/RI\_0556/2020 North America / USA / Rhode Island 2020-03-01 RI  
State Health Laboratory Pathogen Discovery, Respiratory Viruses Branch, Division of Viral Diseases, Centers for  
Disease Control and Prevention Krista Queen, Yan Li, Ying Tao, Jing Zhang, Anne Uehara, Clinton R. Paden,  
Haibin Wang, Rachel Marine, Mary S. Keckler, Alison S. Laufer Halpin, Jasmine Padilla, Justin Lee, Christopher  
A. Elkins, Suxiang Tong

EPI\_ISL\_420796 hCoV-19/USA/TX\_2039/2020 North America / USA / Texas 2020-02-29 Texas DSHS Lab  
Services Pathogen Discovery, Respiratory Viruses Branch, Division of Viral Diseases, Centers for Disease  
Control and Prevention Krista Queen, Yan Li, Ying Tao, Jing Zhang, Anne Uehara, Clinton R. Paden, Haibin Wang,  
Rachel Marine, Mary S. Keckler, Alison S. Laufer Halpin, Jasmine Padilla, Justin Lee, Christopher A. Elkins,  
Suxiang Tong

EPI\_ISL\_420797 hCoV-19/USA/TX\_2817/2020 North America / USA / Texas 2020-03-01 Texas DSHS Lab  
Services Pathogen Discovery, Respiratory Viruses Branch, Division of Viral Diseases, Centers for Disease  
Control and Prevention Krista Queen, Yan Li, Ying Tao, Jing Zhang, Anne Uehara, Clinton R. Paden, Haibin Wang,  
Rachel Marine, Mary S. Keckler, Alison S. Laufer Halpin, Jasmine Padilla, Justin Lee, Christopher A. Elkins,  
Suxiang Tong

EPI\_ISL\_420798 hCoV-19/USA/TX\_2967/2020 North America / USA / Texas 2020-03-01 Texas DSHS Lab  
Services Pathogen Discovery, Respiratory Viruses Branch, Division of Viral Diseases, Centers for Disease  
Control and Prevention Krista Queen, Yan Li, Ying Tao, Jing Zhang, Anne Uehara, Clinton R. Paden, Haibin Wang,  
Rachel Marine, Mary S. Keckler, Alison S. Laufer Halpin, Jasmine Padilla, Justin Lee, Christopher A. Elkins,  
Suxiang Tong

EPI\_ISL\_420799 hCoV-19/Korea/BA-ACH\_2604/2020 Asia / Korea 2020-02-27 Brian D. Allgood Army Community  
Hospital Pathogen Discovery, Respiratory Viruses Branch, Division of Viral Diseases, Centers for Disease  
Control and Prevention Krista Queen, Yan Li, Ying Tao, Jing Zhang, Anne Uehara, Clinton R. Paden, Haibin Wang,  
Rachel Marine, Mary S. Keckler, Alison S. Laufer Halpin, Jasmine Padilla, Justin Lee, Christopher A. Elkins,  
Suxiang Tong

EPI\_ISL\_420822 hCoV-19/USA/UT-0349/2020 North America / USA / Utah 2020-03-25 Utah Public  
Health Laboratory Utah Public Health Laboratory Erin Young, Kelly Oakeson

EPI\_ISL\_420899 hCoV-19/Germany/BAV-V2010492/2020 Europe / Germany / Munich 2020-03-11 Max von  
Pettenkofer Institute, Virology, National Reference Center for Retroviruses, LMU Munich Laboratory for  
Functional Genome Analysis, Dept. Genomics, Gene Center of the LMU Munich Max Muenchhoff, Stefan Krebs,  
Alexander Graf, Ashok Varadharajan, Oliver Keppler, Helmut Blum

EPI\_ISL\_423091 hCoV-19/England/20134016802/2020 Europe / United Kingdom / England 2020-03-24  
Respiratory Virus Unit, Microbiology Services Colindale, Public Health England Respiratory Virus Unit,  
Microbiology Services Colindale, Public Health England Monica Galiano, Shahjahan Miah, Angie Lackenby, Omolola  
Akinbami, Tiina Talts, Leena Bhaw, Richard Myers, Steven Platt, Kirstin Edwards, Jonathan Hubb, Joanna Ellis,  
Maria Zambon

EPI\_ISL\_423092 hCoV-19/England/20134016902/2020 Europe / United Kingdom / England 2020-03-24  
Respiratory Virus Unit, Microbiology Services Colindale, Public Health England Respiratory Virus Unit,  
Microbiology Services Colindale, Public Health England Monica Galiano, Shahjahan Miah, Angie Lackenby, Omolola















19 Genomics UK (COG-UK) Consortium Ana da Silva Filipe, Kathy Smollett, Stephen Carmichael, Natasha Johnson, Daniel Mair, Lily Tong, Jenna Nichols; Sarah McDonald; Richard Orton, Joseph Hughes, Sreenu Vattipally, David L Robertson; Kathy Li, Natasha Jesudason, Rajiv Shah, James Shepherd, Antonia Ho, Emma Thomson; Alasdair MacLean, Rory Gunson.

EPI\_ISL\_425701 hCoV-19/Scotland/CVR162/2020 Europe / United Kingdom / Scotland 2020-03-17 West of Scotland Specialist Virology Centre, NHSGGC / MRC-University of Glasgow Centre for Virus Research COVID-19 Genomics UK (COG-UK) Consortium Ana da Silva Filipe, Kathy Smollett, Stephen Carmichael, Natasha Johnson, Daniel Mair, Lily Tong, Jenna Nichols; Sarah McDonald; Richard Orton, Joseph Hughes, Sreenu Vattipally, David L Robertson; Kathy Li, Natasha Jesudason, Rajiv Shah, James Shepherd, Antonia Ho, Emma Thomson; Alasdair MacLean, Rory Gunson.

EPI\_ISL\_426800 hCoV-19/Australia/VIC534/2020 Oceania / Australia / Victoria 2020-03-25 Victorian Infectious Diseases Reference Laboratory (VIDRL) Microbiological Diagnostic Unit Public Health Laboratory and Victorian Infectious Diseases Reference Laboratory, Doherty Institute Caly L., Seemann T., Sait, M., Schultz M., Druce J., Sherry, N.

EPI\_ISL\_426801 hCoV-19/Australia/VIC535/2020 Oceania / Australia / Victoria 2020-03-25 Victorian Infectious Diseases Reference Laboratory (VIDRL) Microbiological Diagnostic Unit Public Health Laboratory and Victorian Infectious Diseases Reference Laboratory, Doherty Institute Caly L., Seemann T., Sait, M., Schultz M., Druce J., Sherry, N.

EPI\_ISL\_426802 hCoV-19/Australia/VIC536/2020 Oceania / Australia / Victoria 2020-03-24 Victorian Infectious Diseases Reference Laboratory (VIDRL) Microbiological Diagnostic Unit Public Health Laboratory and Victorian Infectious Diseases Reference Laboratory, Doherty Institute Caly L., Seemann T., Sait, M., Schultz M., Druce J., Sherry, N.

EPI\_ISL\_426803 hCoV-19/Australia/VIC537/2020 Oceania / Australia / Victoria 2020-03-24 Victorian Infectious Diseases Reference Laboratory (VIDRL) Microbiological Diagnostic Unit Public Health Laboratory and Victorian Infectious Diseases Reference Laboratory, Doherty Institute Caly L., Seemann T., Sait, M., Schultz M., Druce J., Sherry, N.

EPI\_ISL\_426804 hCoV-19/Australia/VIC538/2020 Oceania / Australia / Victoria 2020-03-23 Victorian Infectious Diseases Reference Laboratory (VIDRL) Microbiological Diagnostic Unit Public Health Laboratory and Victorian Infectious Diseases Reference Laboratory, Doherty Institute Caly L., Seemann T., Sait, M., Schultz M., Druce J., Sherry, N.

EPI\_ISL\_426805 hCoV-19/Australia/VIC540/2020 Oceania / Australia / Victoria 2020-03-24 Victorian Infectious Diseases Reference Laboratory (VIDRL) Microbiological Diagnostic Unit Public Health Laboratory and Victorian Infectious Diseases Reference Laboratory, Doherty Institute Caly L., Seemann T., Sait, M., Schultz M., Druce J., Sherry, N.

EPI\_ISL\_426806 hCoV-19/Australia/VIC541/2020 Oceania / Australia / Victoria 2020-03-24 Victorian Infectious Diseases Reference Laboratory (VIDRL) Microbiological Diagnostic Unit Public Health Laboratory and Victorian Infectious Diseases Reference Laboratory, Doherty Institute Caly L., Seemann T., Sait, M., Schultz M., Druce J., Sherry, N.

EPI\_ISL\_426807 hCoV-19/Australia/VIC544/2020 Oceania / Australia / Victoria 2020-03-23 Victorian Infectious Diseases Reference Laboratory (VIDRL) Microbiological Diagnostic Unit Public Health Laboratory and Victorian Infectious Diseases Reference Laboratory, Doherty Institute Caly L., Seemann T., Sait, M., Schultz M., Druce J., Sherry, N.

EPI\_ISL\_426809 hCoV-19/Australia/VIC546/2020 Oceania / Australia / Victoria 2020-03-24 Victorian Infectious Diseases Reference Laboratory (VIDRL) Microbiological Diagnostic Unit Public Health Laboratory and Victorian Infectious Diseases Reference Laboratory, Doherty Institute Caly L., Seemann T., Sait, M., Schultz M., Druce J., Sherry, N.

EPI\_ISL\_426810 hCoV-19/Australia/VIC547/2020 Oceania / Australia / Victoria 2020-03-25 Victorian Infectious Diseases Reference Laboratory (VIDRL) Microbiological Diagnostic Unit Public Health Laboratory and Victorian Infectious Diseases Reference Laboratory, Doherty Institute Caly L., Seemann T., Sait, M., Schultz M., Druce J., Sherry, N.

EPI\_ISL\_426811 hCoV-19/Australia/VIC548/2020 Oceania / Australia / Victoria 2020-03-25 Victorian Infectious Diseases Reference Laboratory (VIDRL) Microbiological Diagnostic Unit Public Health Laboratory and Victorian Infectious Diseases Reference Laboratory, Doherty Institute Caly L., Seemann T., Sait, M., Schultz M., Druce J., Sherry, N.

EPI\_ISL\_426812 hCoV-19/Australia/VIC549/2020 Oceania / Australia / Victoria 2020-03-23 Victorian Infectious Diseases Reference Laboratory (VIDRL) Microbiological Diagnostic Unit Public Health Laboratory and Victorian Infectious Diseases Reference Laboratory, Doherty Institute Caly L., Seemann T., Sait, M., Schultz M., Druce J., Sherry, N.

EPI\_ISL\_426813 hCoV-19/Australia/VIC551/2020 Oceania / Australia / Victoria 2020-03-25 Victorian Infectious Diseases Reference Laboratory (VIDRL) Microbiological Diagnostic Unit Public Health Laboratory and Victorian Infectious Diseases Reference Laboratory, Doherty Institute Caly L., Seemann T., Sait, M., Schultz M., Druce J., Sherry, N.

EPI\_ISL\_426816 hCoV-19/Australia/VIC555/2020 Oceania / Australia / Victoria 2020-03-25 Victorian Infectious Diseases Reference Laboratory (VIDRL) Microbiological Diagnostic Unit Public Health Laboratory and Victorian Infectious Diseases Reference Laboratory, Doherty Institute Caly L., Seemann T., Sait, M., Schultz M., Druce J., Sherry, N.

EPI\_ISL\_426817 hCoV-19/Australia/VIC556/2020 Oceania / Australia / Victoria 2020-03-25 Victorian Infectious Diseases Reference Laboratory (VIDRL) Microbiological Diagnostic Unit Public Health Laboratory and Victorian Infectious Diseases Reference Laboratory, Doherty Institute Caly L., Seemann T., Sait, M., Schultz M., Druce J., Sherry, N.









|                                                                                                                                                                                                                                                 |                                    |                                          |            |                 |
|-------------------------------------------------------------------------------------------------------------------------------------------------------------------------------------------------------------------------------------------------|------------------------------------|------------------------------------------|------------|-----------------|
| EPI_ISL_426893                                                                                                                                                                                                                                  | hCoV-19/Czech Republic/IAB_18/2020 | Europe / Czech Republic                  | 2020-03-27 | Motol           |
| University Hospital Institute of Applied Biotechnologies a.s. Petr Brož, Jan Geryk, Petr Klempt, Martin Kašný, Adam Novotný, Kateřina Kvapilová, Pavel Dřevínek, Petr Kvapil, Milan Macek                                                       |                                    |                                          |            |                 |
| EPI_ISL_426894                                                                                                                                                                                                                                  | hCoV-19/Czech Republic/IAB_20/2020 | Europe / Czech Republic                  | 2020-03-27 | Motol           |
| University Hospital Institute of Applied Biotechnologies a.s. Petr Brož, Jan Geryk, Petr Klempt, Martin Kašný, Adam Novotný, Kateřina Kvapilová, Pavel Dřevínek, Petr Kvapil, Milan Macek                                                       |                                    |                                          |            |                 |
| EPI_ISL_426895                                                                                                                                                                                                                                  | hCoV-19/Czech Republic/IAB_21/2020 | Europe / Czech Republic                  | 2020-03-27 | Motol           |
| University Hospital Institute of Applied Biotechnologies a.s. Petr Brož, Jan Geryk, Petr Klempt, Martin Kašný, Adam Novotný, Kateřina Kvapilová, Pavel Dřevínek, Petr Kvapil, Milan Macek                                                       |                                    |                                          |            |                 |
| EPI_ISL_426896                                                                                                                                                                                                                                  | hCoV-19/Czech Republic/IAB_22/2020 | Europe / Czech Republic                  | 2020-03-28 | Motol           |
| University Hospital Institute of Applied Biotechnologies a.s. Petr Brož, Jan Geryk, Petr Klempt, Martin Kašný, Adam Novotný, Kateřina Kvapilová, Pavel Dřevínek, Petr Kvapil, Milan Macek                                                       |                                    |                                          |            |                 |
| EPI_ISL_426897                                                                                                                                                                                                                                  | hCoV-19/Czech Republic/IAB_23/2020 | Europe / Czech Republic                  | 2020-03-29 | Motol           |
| University Hospital Institute of Applied Biotechnologies a.s. Petr Brož, Jan Geryk, Petr Klempt, Martin Kašný, Adam Novotný, Kateřina Kvapilová, Pavel Dřevínek, Petr Kvapil, Milan Macek                                                       |                                    |                                          |            |                 |
| EPI_ISL_426898                                                                                                                                                                                                                                  | hCoV-19/Australia/NT10/2020        | Oceania / Australia / Northern territory | 2020-03-26 |                 |
| Royal Darwin Hospital Pathology Microbiological Diagnostic Unit Public Health Laboratory and Victorian Infectious Diseases Reference Laboratory, Doherty Institute Meumann, E., Caly L., Seemann T., Sait, M., Schultz M., Druce J., Sherry, N. |                                    |                                          |            |                 |
| EPI_ISL_426899                                                                                                                                                                                                                                  | hCoV-19/Australia/NT11/2020        | Oceania / Australia / Northern territory | 2020-03-27 |                 |
| Royal Darwin Hospital Pathology Microbiological Diagnostic Unit Public Health Laboratory and Victorian Infectious Diseases Reference Laboratory, Doherty Institute Meumann, E., Caly L., Seemann T., Sait, M., Schultz M., Druce J., Sherry, N. |                                    |                                          |            |                 |
| EPI_ISL_426900                                                                                                                                                                                                                                  | hCoV-19/Australia/NT12/2020        | Oceania / Australia / Northern territory | 2020-03-25 |                 |
| Royal Darwin Hospital Pathology Microbiological Diagnostic Unit Public Health Laboratory and Victorian Infectious Diseases Reference Laboratory, Doherty Institute Meumann, E., Caly L., Seemann T., Sait, M., Schultz M., Druce J., Sherry, N. |                                    |                                          |            |                 |
| EPI_ISL_426901                                                                                                                                                                                                                                  | hCoV-19/Australia/NT13/2020        | Oceania / Australia / Northern territory | 2020-03-25 |                 |
| Royal Darwin Hospital Pathology Microbiological Diagnostic Unit Public Health Laboratory and Victorian Infectious Diseases Reference Laboratory, Doherty Institute Meumann, E., Caly L., Seemann T., Sait, M., Schultz M., Druce J., Sherry, N. |                                    |                                          |            |                 |
| EPI_ISL_426904                                                                                                                                                                                                                                  | hCoV-19/Australia/NT17/2020        | Oceania / Australia / Northern territory | 2020-03-24 |                 |
| Royal Darwin Hospital Pathology Microbiological Diagnostic Unit Public Health Laboratory and Victorian Infectious Diseases Reference Laboratory, Doherty Institute Meumann, E., Caly L., Seemann T., Sait, M., Schultz M., Druce J., Sherry, N. |                                    |                                          |            |                 |
| EPI_ISL_426906                                                                                                                                                                                                                                  | hCoV-19/Australia/VIC473/2020      | Oceania / Australia / Victoria           | 2020-03-28 | Microbiological |
| Diagnostic Unit Public Health Laboratory Microbiological Diagnostic Unit Public Health Laboratory Seemann T., Schultz M., Sait, M., Sherry, N.                                                                                                  |                                    |                                          |            |                 |
| EPI_ISL_426907                                                                                                                                                                                                                                  | hCoV-19/Australia/VIC475/2020      | Oceania / Australia / Victoria           | 2020-03-28 | Microbiological |
| Diagnostic Unit Public Health Laboratory Microbiological Diagnostic Unit Public Health Laboratory Seemann T., Schultz M., Sait, M., Sherry, N.                                                                                                  |                                    |                                          |            |                 |
| EPI_ISL_426910                                                                                                                                                                                                                                  | hCoV-19/Australia/VIC478/2020      | Oceania / Australia / Victoria           | 2020-03-28 | Microbiological |
| Diagnostic Unit Public Health Laboratory Microbiological Diagnostic Unit Public Health Laboratory Seemann T., Schultz M., Sait, M., Sherry, N.                                                                                                  |                                    |                                          |            |                 |
| EPI_ISL_429074                                                                                                                                                                                                                                  | hCoV-19/Guangzhou/GZMU0003/2020    | Asia / China / Guangzhou                 | 2020-02-07 | The First       |
| Affiliated Hospital of Guangzhou Medical University BGI-shenzhen & The First Affiliated Hospital of Guangzhou Medical University Yanqun Wang, Daxi Wang, Lu Zhang, Wanying Sun, Zhaoyong Zhang et al.                                           |                                    |                                          |            |                 |
| EPI_ISL_429075                                                                                                                                                                                                                                  | hCoV-19/Guangzhou/GZMU0008/2020    | Asia / China / Guangzhou                 | 2020-02-07 | The First       |
| Affiliated Hospital of Guangzhou Medical University BGI-shenzhen & The First Affiliated Hospital of Guangzhou Medical University Yanqun Wang, Daxi Wang, Lu Zhang, Wanying Sun, Zhaoyong Zhang et al.                                           |                                    |                                          |            |                 |
| EPI_ISL_429076                                                                                                                                                                                                                                  | hCoV-19/Guangzhou/GZMU0009/2020    | Asia / China / Guangzhou                 | 2020-02-07 | The First       |
| Affiliated Hospital of Guangzhou Medical University BGI-shenzhen & The First Affiliated Hospital of Guangzhou Medical University                                                                                                                |                                    |                                          |            |                 |
| EPI_ISL_429077                                                                                                                                                                                                                                  | hCoV-19/Guangzhou/GZMU0010/2020    | Asia / China / Guangzhou                 | 2020-02-07 | The First       |
| Affiliated Hospital of Guangzhou Medical University BGI-shenzhen & The First Affiliated Hospital of Guangzhou Medical University Yanqun Wang, Daxi Wang, Lu Zhang, Wanying Sun, Zhaoyong Zhang et al.                                           |                                    |                                          |            |                 |
| EPI_ISL_429078                                                                                                                                                                                                                                  | hCoV-19/Guangzhou/GZMU0013/2020    | Asia / China / Guangzhou                 | 2020-02-07 | The First       |
| Affiliated Hospital of Guangzhou Medical University BGI-shenzhen & The First Affiliated Hospital of Guangzhou Medical University                                                                                                                |                                    |                                          |            |                 |
| EPI_ISL_429079                                                                                                                                                                                                                                  | hCoV-19/Guangzhou/GZMU0017/2020    | Asia / China / Guangzhou                 | 2020-02-05 | The First       |
| Affiliated Hospital of Guangzhou Medical University BGI-shenzhen & The First Affiliated Hospital of Guangzhou Medical University                                                                                                                |                                    |                                          |            |                 |
| EPI_ISL_429080                                                                                                                                                                                                                                  | hCoV-19/Guangzhou/GZMU0019/2020    | Asia / China / Guangzhou                 | 2020-02-05 | The First       |
| Affiliated Hospital of Guangzhou Medical University BGI-shenzhen & The First Affiliated Hospital of Guangzhou Medical University                                                                                                                |                                    |                                          |            |                 |
| EPI_ISL_429081                                                                                                                                                                                                                                  | hCoV-19/Guangzhou/GZMU0020/2020    | Asia / China / Guangzhou                 | 2020-02-05 | The First       |
| Affiliated Hospital of Guangzhou Medical University BGI-shenzhen & The First Affiliated Hospital of Guangzhou Medical University                                                                                                                |                                    |                                          |            |                 |
| EPI_ISL_429082                                                                                                                                                                                                                                  | hCoV-19/Guangzhou/GZMU0023/2020    | Asia / China / Guangzhou                 | 2020-02-05 | The First       |
| Affiliated Hospital of Guangzhou Medical University BGI-shenzhen & The First Affiliated Hospital of                                                                                                                                             |                                    |                                          |            |                 |

|                |                                 |                           |            |                                                               |                                                                                                                                                                                         |
|----------------|---------------------------------|---------------------------|------------|---------------------------------------------------------------|-----------------------------------------------------------------------------------------------------------------------------------------------------------------------------------------|
| EPI_ISL_429083 | hCoV-19/Guangzhou/GZMU0024/2020 | Asia / China / Guangzhou  | 2020-02-05 | The First Affiliated Hospital of Guangzhou Medical University | Yanqun Wang, Daxi Wang, Lu Zhang, Wanying Sun, Zhaoyong Zhang et al.                                                                                                                    |
| EPI_ISL_429084 | hCoV-19/Guangzhou/GZMU0025/2020 | Asia / China / Guangzhou  | 2020-02-05 | The First Affiliated Hospital of Guangzhou Medical University | Yanqun Wang, Daxi Wang, Lu Zhang, Wanying Sun, Zhaoyong Zhang et al.                                                                                                                    |
| EPI_ISL_429085 | hCoV-19/Guangzhou/GZMU0033/2020 | Asia / China / Guangzhou  | 2020-02-01 | The First Affiliated Hospital of Guangzhou Medical University | Yanqun Wang, Daxi Wang, Lu Zhang, Wanying Sun, Zhaoyong Zhang et al.                                                                                                                    |
| EPI_ISL_429086 | hCoV-19/Guangzhou/GZMU0034/2020 | Asia / China / Guangzhou  | 2020-02-01 | The First Affiliated Hospital of Guangzhou Medical University | Yanqun Wang, Daxi Wang, Lu Zhang, Wanying Sun, Zhaoyong Zhang et al.                                                                                                                    |
| EPI_ISL_429088 | hCoV-19/Guangzhou/GZMU0035/2020 | Asia / China / Guangzhou  | 2020-02-01 | The First Affiliated Hospital of Guangzhou Medical University | Yanqun Wang, Daxi Wang, Lu Zhang, Wanying Sun, Zhaoyong Zhang et al.                                                                                                                    |
| EPI_ISL_429089 | hCoV-19/Guangzhou/GZMU0037/2020 | Asia / China / Guangzhou  | 2020-02-08 | The First Affiliated Hospital of Guangzhou Medical University | Yanqun Wang, Daxi Wang, Lu Zhang, Wanying Sun, Zhaoyong Zhang et al.                                                                                                                    |
| EPI_ISL_429090 | hCoV-19/Guangzhou/GZMU0039/2020 | Asia / China / Guangzhou  | 2020-02-08 | The First Affiliated Hospital of Guangzhou Medical University | Yanqun Wang, Daxi Wang, Lu Zhang, Wanying Sun, Zhaoyong Zhang et al.                                                                                                                    |
| EPI_ISL_429091 | hCoV-19/Guangzhou/GZMU0041/2020 | Asia / China / Guangzhou  | 2020-02-08 | The First Affiliated Hospital of Guangzhou Medical University | Yanqun Wang, Daxi Wang, Lu Zhang, Wanying Sun, Zhaoyong Zhang et al.                                                                                                                    |
| EPI_ISL_429092 | hCoV-19/Guangzhou/GZMU0045/2020 | Asia / China / Guangzhou  | 2020-02-08 | The First Affiliated Hospital of Guangzhou Medical University | Yanqun Wang, Daxi Wang, Lu Zhang, Wanying Sun, Zhaoyong Zhang et al.                                                                                                                    |
| EPI_ISL_429093 | hCoV-19/Guangzhou/GZMU0046/2020 | Asia / China / Guangzhou  | 2020-02-08 | The First Affiliated Hospital of Guangzhou Medical University | Yanqun Wang, Daxi Wang, Lu Zhang, Wanying Sun, Zhaoyong Zhang et al.                                                                                                                    |
| EPI_ISL_429094 | hCoV-19/Guangzhou/GZMU0049/2020 | Asia / China / Guangzhou  | 2020-02-08 | The First Affiliated Hospital of Guangzhou Medical University | Yanqun Wang, Daxi Wang, Lu Zhang, Wanying Sun, Zhaoyong Zhang et al.                                                                                                                    |
| EPI_ISL_429095 | hCoV-19/Guangzhou/GZMU0050/2020 | Asia / China / Guangzhou  | 2020-02-08 | The First Affiliated Hospital of Guangzhou Medical University | Yanqun Wang, Daxi Wang, Lu Zhang, Wanying Sun, Zhaoyong Zhang et al.                                                                                                                    |
| EPI_ISL_429096 | hCoV-19/Guangzhou/GZMU0051/2020 | Asia / China / Guangzhou  | 2020-01-29 | The First Affiliated Hospital of Guangzhou Medical University | Yanqun Wang, Daxi Wang, Lu Zhang, Wanying Sun, Zhaoyong Zhang et al.                                                                                                                    |
| EPI_ISL_429097 | hCoV-19/Guangzhou/GZMU0052/2020 | Asia / China / Guangzhou  | 2020-01-29 | The First Affiliated Hospital of Guangzhou Medical University | Yanqun Wang, Daxi Wang, Lu Zhang, Wanying Sun, Zhaoyong Zhang et al.                                                                                                                    |
| EPI_ISL_429098 | hCoV-19/Guangzhou/GZMU0054/2020 | Asia / China / Guangzhou  | 2020-01-29 | The First Affiliated Hospital of Guangzhou Medical University | Yanqun Wang, Daxi Wang, Lu Zhang, Wanying Sun, Zhaoyong Zhang et al.                                                                                                                    |
| EPI_ISL_429100 | hCoV-19/Guangzhou/GZMU0057/2020 | Asia / China / Guangzhou  | 2020-01-27 | The First Affiliated Hospital of Guangzhou Medical University | Yanqun Wang, Daxi Wang, Lu Zhang, Wanying Sun, Zhaoyong Zhang et al.                                                                                                                    |
| EPI_ISL_429101 | hCoV-19/Guangzhou/GZMU0058/2020 | Asia / China / Guangzhou  | 2020-01-27 | The First Affiliated Hospital of Guangzhou Medical University | Yanqun Wang, Daxi Wang, Lu Zhang, Wanying Sun, Zhaoyong Zhang et al.                                                                                                                    |
| EPI_ISL_429102 | hCoV-19/Guangzhou/GZMU0059/2020 | Asia / China / Guangzhou  | 2020-01-27 | The First Affiliated Hospital of Guangzhou Medical University | Yanqun Wang, Daxi Wang, Lu Zhang, Wanying Sun, Zhaoyong Zhang et al.                                                                                                                    |
| EPI_ISL_429103 | hCoV-19/Guangzhou/GZMU0060/2020 | Asia / China / Guangzhou  | 2020-02-09 | The First Affiliated Hospital of Guangzhou Medical University | Yanqun Wang, Daxi Wang, Lu Zhang, Wanying Sun, Zhaoyong Zhang et al.                                                                                                                    |
| EPI_ISL_429104 | hCoV-19/Guangzhou/GZMU0036/2020 | Asia / China / Guangzhou  | 2020-02-01 | The First Affiliated Hospital of Guangzhou Medical University | Yanqun Wang, Daxi Wang, Lu Zhang, Wanying Sun, Zhaoyong Zhang et al.                                                                                                                    |
| EPI_ISL_429105 | hCoV-19/Guangzhou/GZMU0055/2020 | Asia / China / Guangzhou  | 2020-01-29 | The First Affiliated Hospital of Guangzhou Medical University | Yanqun Wang, Daxi Wang, Lu Zhang, Wanying Sun, Zhaoyong Zhang et al.                                                                                                                    |
| EPI_ISL_429115 | hCoV-19/Sweden/20-08142/2020    | Europe / Sweden / Halland | 2020-03-11 | Klinisk mikrobiologi och vardhygien Halmstad                  | The Public Health Agency of Sweden<br>Arne Kotz, Olov Svartstrom, Maria Lind Karlberg, Anna-Malin Linde, Oskar Karlsson Lindsjo, Anna Risberg, Shaman Muradrasoli, Karin Tegmark-Wisell |
| EPI_ISL_429116 | hCoV-19/Sweden/20-08143/2020    | Europe / Sweden / Halland | 2020-03-15 | Klinisk mikrobiologi och vardhygien Halmstad                  | The Public Health Agency of Sweden<br>Arne Kotz, Olov Svartstrom,                                                                                                                       |





EPI\_ISL\_429163 hCoV-19/Thailand/Bangkok-20-50361/2020 Europe / Sweden / Gavleborgs lan 2020-03-16  
The Public Health Agency of Sweden The Public Health Agency of Sweden Olov Svartstrom, Maria Lind Karlberg,  
Anna-Malin Linde, Oskar Karlsson Lindsjo, Anna Risberg, Shaman Muradrasoli, Karin Tegmark-Wisell

EPI\_ISL\_429164 hCoV-19/Thailand/Bangkok-0025/2020 Asia / Thailand / Bangkok 2020-03-13  
Ramathibodi Hospital COVID-19 Network Investigations (CONI) Alliance Elizabeth Batty, Wasun Chantratita,  
Thanat Chookajorn, Stefan Fernandez, Angkana Huang, Poramate Jiaranai, Anthony R. Jones, Khajohn Joosalak,  
Chonticha Klungtong, Theerarat Kochakarn, Namfon Kotanan, Krittikorn Kumpornsin, Wudtichai Manasatienkij,  
Bhakhoom Panthan, Ekawat Pasomsub, Kingkan Rakmanee, Insee Sensorn, Janjira Thaipadungpanit, Arporn  
Wangwiwatsin, Treewat Watthanachockchai

EPI\_ISL\_429165 hCoV-19/Thailand/Bangkok-0026/2020 Asia / Thailand / Bangkok 2020-03-13  
Ramathibodi Hospital COVID-19 Network Investigations (CONI) Alliance Elizabeth Batty, Wasun Chantratita,  
Thanat Chookajorn, Stefan Fernandez, Angkana Huang, Poramate Jiaranai, Anthony R. Jones, Khajohn Joosalak,  
Chonticha Klungtong, Theerarat Kochakarn, Namfon Kotanan, Krittikorn Kumpornsin, Wudtichai Manasatienkij,  
Bhakhoom Panthan, Ekawat Pasomsub, Kingkan Rakmanee, Insee Sensorn, Janjira Thaipadungpanit, Arporn  
Wangwiwatsin, Treewat Watthanachockchai

EPI\_ISL\_429166 hCoV-19/Thailand/Bangkok-0028/2020 Asia / Thailand / Bangkok 2020-03-13  
Ramathibodi Hospital COVID-19 Network Investigations (CONI) Alliance Elizabeth Batty, Wasun Chantratita,  
Thanat Chookajorn, Stefan Fernandez, Angkana Huang, Poramate Jiaranai, Anthony R. Jones, Khajohn Joosalak,  
Chonticha Klungtong, Theerarat Kochakarn, Namfon Kotanan, Krittikorn Kumpornsin, Wudtichai Manasatienkij,  
Bhakhoom Panthan, Ekawat Pasomsub, Kingkan Rakmanee, Insee Sensorn, Janjira Thaipadungpanit, Arporn  
Wangwiwatsin, Treewat Watthanachockchai

EPI\_ISL\_429167 hCoV-19/Thailand/Bangkok-0029/2020 Asia / Thailand / Bangkok 2020-03-13  
Ramathibodi Hospital COVID-19 Network Investigations (CONI) Alliance Elizabeth Batty, Wasun Chantratita,  
Thanat Chookajorn, Stefan Fernandez, Angkana Huang, Poramate Jiaranai, Anthony R. Jones, Khajohn Joosalak,  
Chonticha Klungtong, Theerarat Kochakarn, Namfon Kotanan, Krittikorn Kumpornsin, Wudtichai Manasatienkij,  
Bhakhoom Panthan, Ekawat Pasomsub, Kingkan Rakmanee, Insee Sensorn, Janjira Thaipadungpanit, Arporn  
Wangwiwatsin, Treewat Watthanachockchai

EPI\_ISL\_429169 hCoV-19/Thailand/Bangkok-0033/2020 Asia / Thailand / Bangkok 2020-03-17  
Ramathibodi Hospital COVID-19 Network Investigations (CONI) Alliance Elizabeth Batty, Wasun Chantratita,  
Thanat Chookajorn, Stefan Fernandez, Angkana Huang, Poramate Jiaranai, Anthony R. Jones, Khajohn Joosalak,  
Chonticha Klungtong, Theerarat Kochakarn, Namfon Kotanan, Krittikorn Kumpornsin, Wudtichai Manasatienkij,  
Bhakhoom Panthan, Ekawat Pasomsub, Kingkan Rakmanee, Insee Sensorn, Janjira Thaipadungpanit, Arporn  
Wangwiwatsin, Treewat Watthanachockchai

EPI\_ISL\_429170 hCoV-19/Thailand/Bangkok-0034/2020 Asia / Thailand / Bangkok 2020-03-17  
Ramathibodi Hospital COVID-19 Network Investigations (CONI) Alliance Elizabeth Batty, Wasun Chantratita,  
Thanat Chookajorn, Stefan Fernandez, Angkana Huang, Poramate Jiaranai, Anthony R. Jones, Khajohn Joosalak,  
Chonticha Klungtong, Theerarat Kochakarn, Namfon Kotanan, Krittikorn Kumpornsin, Wudtichai Manasatienkij,  
Bhakhoom Panthan, Ekawat Pasomsub, Kingkan Rakmanee, Insee Sensorn, Janjira Thaipadungpanit, Arporn  
Wangwiwatsin, Treewat Watthanachockchai

EPI\_ISL\_429171 hCoV-19/Thailand/Bangkok-0035/2020 Asia / Thailand / Bangkok 2020-03-18  
Ramathibodi Hospital COVID-19 Network Investigations (CONI) Alliance Elizabeth Batty, Wasun Chantratita,  
Thanat Chookajorn, Stefan Fernandez, Angkana Huang, Poramate Jiaranai, Anthony R. Jones, Khajohn Joosalak,  
Chonticha Klungtong, Theerarat Kochakarn, Namfon Kotanan, Krittikorn Kumpornsin, Wudtichai Manasatienkij,  
Bhakhoom Panthan, Ekawat Pasomsub, Kingkan Rakmanee, Insee Sensorn, Janjira Thaipadungpanit, Arporn  
Wangwiwatsin, Treewat Watthanachockchai

EPI\_ISL\_429172 hCoV-19/Thailand/Bangkok-0036/2020 Asia / Thailand / Bangkok 2020-03-21  
Ramathibodi Hospital COVID-19 Network Investigations (CONI) Alliance Elizabeth Batty, Wasun Chantratita,  
Thanat Chookajorn, Stefan Fernandez, Angkana Huang, Poramate Jiaranai, Anthony R. Jones, Khajohn Joosalak,  
Chonticha Klungtong, Theerarat Kochakarn, Namfon Kotanan, Krittikorn Kumpornsin, Wudtichai Manasatienkij,  
Bhakhoom Panthan, Ekawat Pasomsub, Kingkan Rakmanee, Insee Sensorn, Janjira Thaipadungpanit, Arporn  
Wangwiwatsin, Treewat Watthanachockchai

EPI\_ISL\_429173 hCoV-19/Thailand/Bangkok-0037/2020 Asia / Thailand / Bangkok 2020-03-21  
Ramathibodi Hospital COVID-19 Network Investigations (CONI) Alliance Elizabeth Batty, Wasun Chantratita,  
Thanat Chookajorn, Stefan Fernandez, Angkana Huang, Poramate Jiaranai, Anthony R. Jones, Khajohn Joosalak,  
Chonticha Klungtong, Theerarat Kochakarn, Namfon Kotanan, Krittikorn Kumpornsin, Wudtichai Manasatienkij,  
Bhakhoom Panthan, Ekawat Pasomsub, Kingkan Rakmanee, Insee Sensorn, Janjira Thaipadungpanit, Arporn  
Wangwiwatsin, Treewat Watthanachockchai

EPI\_ISL\_429174 hCoV-19/Thailand/Bangkok-0038/2020 Asia / Thailand / Bangkok 2020-03-25  
Ramathibodi Hospital COVID-19 Network Investigations (CONI) Alliance Elizabeth Batty, Wasun Chantratita,  
Thanat Chookajorn, Stefan Fernandez, Angkana Huang, Poramate Jiaranai, Anthony R. Jones, Khajohn Joosalak,  
Chonticha Klungtong, Theerarat Kochakarn, Namfon Kotanan, Krittikorn Kumpornsin, Wudtichai Manasatienkij,  
Bhakhoom Panthan, Ekawat Pasomsub, Kingkan Rakmanee, Insee Sensorn, Janjira Thaipadungpanit, Arporn  
Wangwiwatsin, Treewat Watthanachockchai

EPI\_ISL\_429175 hCoV-19/Thailand/Bangkok-0039/2020 Asia / Thailand / Bangkok 2020-03-28  
Ramathibodi Hospital COVID-19 Network Investigations (CONI) Alliance Elizabeth Batty, Wasun Chantratita,  
Thanat Chookajorn, Stefan Fernandez, Angkana Huang, Poramate Jiaranai, Anthony R. Jones, Khajohn Joosalak,  
Chonticha Klungtong, Theerarat Kochakarn, Namfon Kotanan, Krittikorn Kumpornsin, Wudtichai Manasatienkij,  
Bhakhoom Panthan, Ekawat Pasomsub, Kingkan Rakmanee, Insee Sensorn, Janjira Thaipadungpanit, Arporn  
Wangwiwatsin, Treewat Watthanachockchai

EPI\_ISL\_429178 hCoV-19/Thailand/Bangkok-0042/2020 Asia / Thailand / Bangkok 2020-03-28

Ramathibodi Hospital COVID-19 Network Investigations (CONI) Alliance Elizabeth Batty, Wasun Chantratita, Thanat Chookajorn, Stefan Fernandez, Angkana Huang, Poramate Jiaranai, Anthony R. Jones, Khajohn Joosalak, Chonticha Klungtong, Theerarat Kochakarn, Namfon Kotanan, Krittikorn Kumpornsin, Wudtichai Manasatienkij, Bhakbhoom Panthan, Ekawat Pasomsub, Kingkan Rakmanee, Insee Sensorn, Janjira Thaipadungpanit, Arporn Wangwiwatsin, Treewat Watthanachockchai  
EPI\_ISL\_429179 hCoV-19/Thailand/Bangkok-0043/2020 Asia / Thailand / Bangkok 2020-03-28  
Ramathibodi Hospital COVID-19 Network Investigations (CONI) Alliance Elizabeth Batty, Wasun Chantratita, Thanat Chookajorn, Stefan Fernandez, Angkana Huang, Poramate Jiaranai, Anthony R. Jones, Khajohn Joosalak, Chonticha Klungtong, Theerarat Kochakarn, Namfon Kotanan, Krittikorn Kumpornsin, Wudtichai Manasatienkij, Bhakbhoom Panthan, Ekawat Pasomsub, Kingkan Rakmanee, Insee Sensorn, Janjira Thaipadungpanit, Arporn Wangwiwatsin, Treewat Watthanachockchai  
EPI\_ISL\_429181 hCoV-19/Thailand/Bangkok-0045/2020 Asia / Thailand / Bangkok 2020-03-28  
Ramathibodi Hospital COVID-19 Network Investigations (CONI) Alliance Elizabeth Batty, Wasun Chantratita, Thanat Chookajorn, Stefan Fernandez, Angkana Huang, Poramate Jiaranai, Anthony R. Jones, Khajohn Joosalak, Chonticha Klungtong, Theerarat Kochakarn, Namfon Kotanan, Krittikorn Kumpornsin, Wudtichai Manasatienkij, Bhakbhoom Panthan, Ekawat Pasomsub, Kingkan Rakmanee, Insee Sensorn, Janjira Thaipadungpanit, Arporn Wangwiwatsin, Treewat Watthanachockchai  
EPI\_ISL\_429182 hCoV-19/Thailand/Bangkok-0046/2020 Asia / Thailand / Bangkok 2020-03-28  
Ramathibodi Hospital COVID-19 Network Investigations (CONI) Alliance Elizabeth Batty, Wasun Chantratita, Thanat Chookajorn, Stefan Fernandez, Angkana Huang, Poramate Jiaranai, Anthony R. Jones, Khajohn Joosalak, Chonticha Klungtong, Theerarat Kochakarn, Namfon Kotanan, Krittikorn Kumpornsin, Wudtichai Manasatienkij, Bhakbhoom Panthan, Ekawat Pasomsub, Kingkan Rakmanee, Insee Sensorn, Janjira Thaipadungpanit, Arporn Wangwiwatsin, Treewat Watthanachockchai  
EPI\_ISL\_429183 hCoV-19/Thailand/Bangkok-0047/2020 Asia / Thailand / Bangkok 2020-03-28  
Ramathibodi Hospital COVID-19 Network Investigations (CONI) Alliance Elizabeth Batty, Wasun Chantratita, Thanat Chookajorn, Stefan Fernandez, Angkana Huang, Poramate Jiaranai, Anthony R. Jones, Khajohn Joosalak, Chonticha Klungtong, Theerarat Kochakarn, Namfon Kotanan, Krittikorn Kumpornsin, Wudtichai Manasatienkij, Bhakbhoom Panthan, Ekawat Pasomsub, Kingkan Rakmanee, Insee Sensorn, Janjira Thaipadungpanit, Arporn Wangwiwatsin, Treewat Watthanachockchai  
EPI\_ISL\_429184 hCoV-19/Thailand/Bangkok-0048/2020 Asia / Thailand / Bangkok 2020-03-28  
Ramathibodi Hospital COVID-19 Network Investigations (CONI) Alliance Elizabeth Batty, Wasun Chantratita, Thanat Chookajorn, Stefan Fernandez, Angkana Huang, Poramate Jiaranai, Anthony R. Jones, Khajohn Joosalak, Chonticha Klungtong, Theerarat Kochakarn, Namfon Kotanan, Krittikorn Kumpornsin, Wudtichai Manasatienkij, Bhakbhoom Panthan, Ekawat Pasomsub, Kingkan Rakmanee, Insee Sensorn, Janjira Thaipadungpanit, Arporn Wangwiwatsin, Treewat Watthanachockchai  
EPI\_ISL\_429231 hCoV-19/Italy/TE6571/2020 Europe / Italy / Abruzzo 2020-03-24 Ospedale Civile Giuseppe Mazzini "Istituto Zooprofilattico Sperimentale dell'Abruzzo e Molise ""G. Caporale"" Lorusso A, Marcacci M, Di Domenico M, Ancora M, Curini V, Mangone I, Rinaldi A, Di Pasquale A, Camma C, Puglia I, Savini G  
EPI\_ISL\_429232 hCoV-19/Italy/TE6572/2020 Europe / Italy / Abruzzo 2020-03-24 Ospedale Civile Giuseppe Mazzini "Istituto Zooprofilattico Sperimentale dell'Abruzzo e Molise ""G. Caporale"" Lorusso A, Marcacci M, Di Domenico M, Ancora M, Curini V, Mangone I, Rinaldi A, Di Pasquale A, Camma C, Puglia I, Savini G  
EPI\_ISL\_429235 hCoV-19/Italy/TE6580/2020 Europe / Italy / Abruzzo 2020-03-24 Ospedale Civile Giuseppe Mazzini "Istituto Zooprofilattico Sperimentale dell'Abruzzo e Molise ""G. Caporale"" Lorusso A, Marcacci M, Di Domenico M, Ancora M, Curini V, Mangone I, Rinaldi A, Di Pasquale A, Camma C, Puglia I, Savini G  
EPI\_ISL\_429236 hCoV-19/Italy/TE7859/2020 Europe / Italy / Abruzzo 2020-03-28 Ospedale Civile S. Liberatore di Atri "Istituto Zooprofilattico Sperimentale dell'Abruzzo e Molise ""G. Caporale"" Lorusso A, Marcacci M, Di Domenico M, Ancora M, Curini V, Mangone I, Rinaldi A, Di Pasquale A, Camma C, Puglia I, Savini G  
EPI\_ISL\_429239 hCoV-19/Yunnan/0306-466/2020 Asia / China / Yunnan 2020-03-06 Department of Clinical Laboratory, the First People's Hospital of Yunnan Province Department of Clinical Laboratory, the First People's Hospital of Yunnan Province Yi Sun, Ziqin Dian, Ya Xu, Guiqian Zhang, Xin Fan, Yu Zhang  
EPI\_ISL\_429255 hCoV-19/DRC/1131/2020 Africa / Democratic Republic of the Congo / Kinshasa 2020-04-05 Viral Respiratory Lab, National Institute for Biomedical Research (INRB) Pathogen Sequencing Lab, National Institute for Biomedical Research (INRB) Placide Mbala-Kingebeni, Edith Nkwembe, Eddy Kinganda-Lusamaki, Amuri Aziza, Catherine Pratt, Matthias Pauthner, Josh Quick, Allison Black, James Hadfield, Trevor Bedford, Ian Goodfellow, Nick Loman, Kristian Andersen, Michael Wiley, Steve Ahuka-Mundeke, Jean-Jacques Muyembe Tamfum  
EPI\_ISL\_429256 hCoV-19/Spain/Vircell001/2020 Europe / Spain / Madrid 2020-03-12 Health Sciences Technology Park, Avicena, 8, 18016 Granada. Spain Sequencing and Bioinformatics Service FISABIO-Public Health Joaquín Mendoza, Almudena Rojas, Pablo Mendoza  
EPI\_ISL\_429262 hCoV-19/Denmark/ALAB-HH01/2020 Europe / Denmark / Unknown 2020-03-10 Department of Clinical Microbiology, Copenhagen University Hospital, Hvidovre, Kettegaard Alle 30, 2650 Hvidovre. Albertsen lab, Department of Chemistry and Bioscience, Aalborg University, Denmark Rasmus Kirkegaard  
EPI\_ISL\_429263 hCoV-19/Denmark/ALAB-HH02/2020 Europe / Denmark / Unknown 2020-03-10 Department of Clinical Microbiology, Copenhagen University Hospital, Hvidovre, Kettegaard Alle 30, 2650 Hvidovre. Albertsen lab, Department of Chemistry and Bioscience, Aalborg University, Denmark Rasmus Kirkegaard  
EPI\_ISL\_429264 hCoV-19/Denmark/ALAB-HH03/2020 Europe / Denmark / Unknown 2020-03-10 Department of





Albertsen lab, Department of Chemistry and Bioscience, Aalborg University, Denmark Rasmus Kirkegaard  
EPI\_ISL\_429293 hCoV-19/Denmark/ALAB-HH37/2020 Europe /Denmark / Unknown 2020-03-13 Department of  
Clinical Microbiology, Copenhagen University Hospital, Hvidovre, Kettegaard Alle 30, 2650 Hvidovre.

Albertsen lab, Department of Chemistry and Bioscience, Aalborg University, Denmark Rasmus Kirkegaard  
EPI\_ISL\_429295 hCoV-19/Denmark/ALAB-HH39/2020 Europe / Denmark / Unknown 2020-03-13 Department of  
Clinical Microbiology, Copenhagen University Hospital, Hvidovre, Kettegaard Alle 30, 2650 Hvidovre.

Albertsen lab, Department of Chemistry and Bioscience, Aalborg University, Denmark Rasmus Kirkegaard  
EPI\_ISL\_429299 hCoV-19/Denmark/ALAB-HH43/2020 Europe / Denmark / Unknown 2020-03-14 Department of  
Clinical Microbiology, Copenhagen University Hospital, Hvidovre, Kettegaard Alle 30, 2650 Hvidovre.

Albertsen lab, Department of Chemistry and Bioscience, Aalborg University, Denmark Rasmus Kirkegaard  
EPI\_ISL\_430059 hCoV-19/USA/UT-0513/2020 North America / USA / Utah 2020-04-03 Utah Public  
Health Laboratory Utah Public Health Laboratory Erin Young, Kelly Oakeson

EPI\_ISL\_430061 hCoV-19/USA/UT-0519/2020 North America / USA / Utah 2020-04-03 Utah Public  
Health Laboratory Utah Public Health Laboratory Erin Young, Kelly Oakeson

EPI\_ISL\_430064 hCoV-19/Australia/VIC-CBA4/2020 Oceania / Australia / Victoria 2020-03-07 Geelong Centre  
for Emerging Infectious Diseases Geelong Centre for Emerging Infectious Diseases Chamings A., Bhatta  
T.R., Alexandersen S.

EPI\_ISL\_430065 hCoV-19/Australia/VIC-CBA5/2020 Oceania / Australia / Victoria 2020-04-08 Geelong Centre  
for Emerging Infectious Diseases Geelong Centre for Emerging Infectious Diseases Chamings A., Bhatta  
T.R., Alexandersen S.

EPI\_ISL\_430067 hCoV-19/Russia/StPetersburg-RII4705S/2020 Europe / Russia / St.Petersburg 2020-04-07  
WHO National Influenza Centre Russian Federation WHO National Influenza Centre Russian Federation  
Andrey Komissarov, Artem Fadeev, Mariia Sergeeva, Anna Ivanova, Daria Danilenko

EPI\_ISL\_430068 hCoV-19/Russia/StPetersburg-RII4712V/2020 Europe / Russia / St.Petersburg 2020-04-07  
WHO National Influenza Centre Russian Federation WHO National Influenza Centre Russian Federation  
Andrey Komissarov, Artem Fadeev, Mariia Sergeeva, Anna Ivanova, Daria Danilenko

EPI\_ISL\_430069 hCoV-19/Russia/StPetersburg-RII4780S/2020 Europe / Russia / St.Petersburg 2020-04-07  
WHO National Influenza Centre Russian Federation WHO National Influenza Centre Russian Federation  
Andrey Komissarov, Artem Fadeev, Mariia Sergeeva, Anna Ivanova, Daria Danilenko

EPI\_ISL\_430070 hCoV-19/Russia/StPetersburg-RII4917S/2020 Europe / Russia / St.Petersburg 2020-04-07  
WHO National Influenza Centre Russian Federation WHO National Influenza Centre Russian Federation  
Andrey Komissarov, Artem Fadeev, Mariia Sergeeva, Anna Ivanova, Daria Danilenko

EPI\_ISL\_430071 hCoV-19/Russia/StPetersburg-RII4936S/2020 Europe / Russia / St.Petersburg 2020-04-08  
WHO National Influenza Centre Russian Federation WHO National Influenza Centre Russian Federation  
Andrey Komissarov, Artem Fadeev, Mariia Sergeeva, Anna Ivanova, Daria Danilenko

EPI\_ISL\_430072 hCoV-19/Russia/StPetersburg-RII4937S/2020 Europe / Russia / St.Petersburg 2020-04-08  
WHO National Influenza Centre Russian Federation WHO National Influenza Centre Russian Federation  
Andrey Komissarov, Artem Fadeev, Mariia Sergeeva, Anna Ivanova, Daria Danilenko

EPI\_ISL\_430073 hCoV-19/Russia/StPetersburg-RII4938S/2020 Europe / Russia / St.Petersburg 2020-04-08  
WHO National Influenza Centre Russian Federation WHO National Influenza Centre Russian Federation  
Andrey Komissarov, Artem Fadeev, Mariia Sergeeva, Anna Ivanova, Daria Danilenko

EPI\_ISL\_430074 hCoV-19/Russia/StPetersburg-RII4944S/2020 Europe / Russia / St.Petersburg 2020-04-08  
WHO National Influenza Centre Russian Federation WHO National Influenza Centre Russian Federation  
Andrey Komissarov, Artem Fadeev, Mariia Sergeeva, Anna Ivanova, Daria Danilenko

EPI\_ISL\_430075 hCoV-19/Russia/StPetersburg-RII4949S/2020 Europe / Russia / St.Petersburg 2020-04-09  
WHO National Influenza Centre Russian Federation WHO National Influenza Centre Russian Federation  
Andrey Komissarov, Artem Fadeev, Mariia Sergeeva, Anna Ivanova, Daria Danilenko

EPI\_ISL\_430076 hCoV-19/Russia/StPetersburg-RII4969S/2020 Europe / Russia / St.Petersburg 2020-04-10  
WHO National Influenza Centre Russian Federation WHO National Influenza Centre Russian Federation  
Andrey Komissarov, Artem Fadeev, Mariia Sergeeva, Anna Ivanova, Daria Danilenko

EPI\_ISL\_430077 hCoV-19/Russia/StPetersburg-RII4970S/2020 Europe / Russia / St.Petersburg 2020-04-10  
WHO National Influenza Centre Russian Federation WHO National Influenza Centre Russian Federation  
Andrey Komissarov, Artem Fadeev, Mariia Sergeeva, Anna Ivanova, Daria Danilenko

EPI\_ISL\_430078 hCoV-19/Russia/StPetersburg-RII4972S/2020 Europe / Russia / St.Petersburg 2020-04-10  
WHO National Influenza Centre Russian Federation WHO National Influenza Centre Russian Federation  
Andrey Komissarov, Artem Fadeev, Mariia Sergeeva, Anna Ivanova, Daria Danilenko

EPI\_ISL\_430079 hCoV-19/Russia/StPetersburg-RII4980S/2020 Europe / Russia / St.Petersburg 2020-04-10  
WHO National Influenza Centre Russian Federation WHO National Influenza Centre Russian Federation  
Andrey Komissarov, Artem Fadeev, Mariia Sergeeva, Anna Ivanova, Daria Danilenko

EPI\_ISL\_430080 hCoV-19/Russia/StPetersburg-RII4983S/2020 Europe / Russia / St.Petersburg 2020-04-10  
WHO National Influenza Centre Russian Federation WHO National Influenza Centre Russian Federation  
Andrey Komissarov, Artem Fadeev, Mariia Sergeeva, Anna Ivanova, Daria Danilenko

EPI\_ISL\_430081 hCoV-19/Russia/StPetersburg-RII4984S/2020 Europe / Russia / St.Petersburg 2020-04-10  
WHO National Influenza Centre Russian Federation WHO National Influenza Centre Russian Federation  
Andrey Komissarov, Artem Fadeev, Mariia Sergeeva, Anna Ivanova, Daria Danilenko

EPI\_ISL\_430082 hCoV-19/Russia/StPetersburg-RII4985S/2020 Europe / Russia / St.Petersburg 2020-04-10  
WHO National Influenza Centre Russian Federation WHO National Influenza Centre Russian Federation  
Andrey Komissarov, Artem Fadeev, Mariia Sergeeva, Anna Ivanova, Daria Danilenko

EPI\_ISL\_430083 hCoV-19/Russia/StPetersburg-RII4988S/2020 Europe / Russia / St.Petersburg 2020-04-10  
WHO National Influenza Centre Russian Federation WHO National Influenza Centre Russian Federation



|                                                                                 |                                                  |                                                     |            |
|---------------------------------------------------------------------------------|--------------------------------------------------|-----------------------------------------------------|------------|
| EPI_ISL_430107                                                                  | hCoV-19/Russia/StPetersburg-RII6060S/2020        | Europe / Russia / St.Petersburg                     | 2020-04-15 |
| WHO National Influenza Centre Russian Federation                                | WHO National Influenza Centre Russian Federation |                                                     |            |
| Andrey Komissarov, Artem Fadeev, Mariia Sergeeva, Anna Ivanova, Daria Danilenko |                                                  |                                                     |            |
| EPI_ISL_430108                                                                  | hCoV-19/Russia/StPetersburg-RII6061S/2020        | Europe / Russia / St.Petersburg                     | 2020-04-15 |
| WHO National Influenza Centre Russian Federation                                | WHO National Influenza Centre Russian Federation |                                                     |            |
| Andrey Komissarov, Artem Fadeev, Mariia Sergeeva, Anna Ivanova, Daria Danilenko |                                                  |                                                     |            |
| EPI_ISL_430109                                                                  | hCoV-19/Russia/StPetersburg-RII6063S/2020        | Europe / Russia / St.Petersburg                     | 2020-04-15 |
| WHO National Influenza Centre Russian Federation                                | WHO National Influenza Centre Russian Federation |                                                     |            |
| Andrey Komissarov, Artem Fadeev, Mariia Sergeeva, Anna Ivanova, Daria Danilenko |                                                  |                                                     |            |
| EPI_ISL_430110                                                                  | hCoV-19/Russia/StPetersburg-RII6065S/2020        | Europe / Russia / St.Petersburg                     | 2020-04-15 |
| WHO National Influenza Centre Russian Federation                                | WHO National Influenza Centre Russian Federation |                                                     |            |
| Andrey Komissarov, Artem Fadeev, Mariia Sergeeva, Anna Ivanova, Daria Danilenko |                                                  |                                                     |            |
| EPI_ISL_430111                                                                  | hCoV-19/Russia/StPetersburg-RII6086S/2020        | Europe / Russia / St.Petersburg                     | 2020-04-15 |
| WHO National Influenza Centre Russian Federation                                | WHO National Influenza Centre Russian Federation |                                                     |            |
| Andrey Komissarov, Artem Fadeev, Mariia Sergeeva, Anna Ivanova, Daria Danilenko |                                                  |                                                     |            |
| EPI_ISL_430112                                                                  | hCoV-19/Russia/Ulan-Ude-RII4562V/2020            | Europe / Russia / Buryat Republic / Ulan-Ude        | 2020-03-25 |
| WHO National Influenza Centre Russian Federation                                | WHO National Influenza Centre Russian Federation |                                                     |            |
| Andrey Komissarov, Artem Fadeev, Mariia Sergeeva, Anna Ivanova, Daria Danilenko |                                                  |                                                     |            |
| EPI_ISL_430113                                                                  | hCoV-19/USA/WA-S259/2020                         | North America / USA / Washington / King County      | 2020-03-04 |
| Seattle Flu Study                                                               | Seattle Flu Study                                | Chu et al                                           |            |
| EPI_ISL_430114                                                                  | hCoV-19/USA/WA-S260/2020                         | North America / USA / Washington / King County      | 2020-03-12 |
| Seattle Flu Study                                                               | Seattle Flu Study                                | Chu et al                                           |            |
| EPI_ISL_430115                                                                  | hCoV-19/USA/WA-S261/2020                         | North America / USA / Washington                    | 2020-03-30 |
| Flu Study                                                                       | Seattle Flu Study                                | Chu et al                                           | Seattle    |
| EPI_ISL_430116                                                                  | hCoV-19/USA/WA-S262/2020                         | North America / USA / Washington                    | 2020-03-16 |
| Flu Study                                                                       | Seattle Flu Study                                | Chu et al                                           | Seattle    |
| EPI_ISL_430117                                                                  | hCoV-19/USA/WA-S263/2020                         | North America / USA / Washington / King County      | 2020-03-05 |
| Seattle Flu Study                                                               | Seattle Flu Study                                | Chu et al                                           |            |
| EPI_ISL_430118                                                                  | hCoV-19/USA/WA-S264/2020                         | North America / USA / Washington / King County      | 2020-03-03 |
| Seattle Flu Study                                                               | Seattle Flu Study                                | Chu et al                                           |            |
| EPI_ISL_430119                                                                  | hCoV-19/USA/WA-S265/2020                         | North America / USA / Washington / Snohomish County | 2020-03-05 |
| Seattle Flu Study                                                               | Seattle Flu Study                                | Chu et al                                           |            |
| EPI_ISL_430121                                                                  | hCoV-19/USA/WA-S267/2020                         | North America / USA / Washington / King County      | 2020-03-31 |
| Seattle Flu Study                                                               | Seattle Flu Study                                | Chu et al                                           |            |
| EPI_ISL_430122                                                                  | hCoV-19/USA/WA-S268/2020                         | North America / USA / Washington / King County      | 2020-03-05 |
| Seattle Flu Study                                                               | Seattle Flu Study                                | Chu et al                                           |            |
| EPI_ISL_430123                                                                  | hCoV-19/USA/WA-S269/2020                         | North America / USA / Washington / King County      | 2020-03-10 |
| Seattle Flu Study                                                               | Seattle Flu Study                                | Chu et al                                           |            |
| EPI_ISL_430124                                                                  | hCoV-19/USA/WA-S270/2020                         | North America / USA / Washington / King County      | 2020-03-06 |
| Seattle Flu Study                                                               | Seattle Flu Study                                | Chu et al                                           |            |
| EPI_ISL_430125                                                                  | hCoV-19/USA/WA-S271/2020                         | North America / USA / Washington / King County      | 2020-03-31 |
| Seattle Flu Study                                                               | Seattle Flu Study                                | Chu et al                                           |            |
| EPI_ISL_430126                                                                  | hCoV-19/USA/WA-S272/2020                         | North America / USA / Washington / King County      | 2020-02-26 |
| Seattle Flu Study                                                               | Seattle Flu Study                                | Chu et al                                           |            |
| EPI_ISL_430127                                                                  | hCoV-19/USA/WA-S273/2020                         | North America / USA / Washington / King County      | 2020-03-12 |
| Seattle Flu Study                                                               | Seattle Flu Study                                | Chu et al                                           |            |
| EPI_ISL_430128                                                                  | hCoV-19/USA/WA-S274/2020                         | North America / USA / Washington / King County      | 2020-03-08 |
| Seattle Flu Study                                                               | Seattle Flu Study                                | Chu et al                                           |            |
| EPI_ISL_430129                                                                  | hCoV-19/USA/WA-S275/2020                         | North America / USA / Washington / King County      | 2020-03-06 |
| Seattle Flu Study                                                               | Seattle Flu Study                                | Chu et al                                           |            |
| EPI_ISL_430130                                                                  | hCoV-19/USA/WA-S276/2020                         | North America / USA / Washington                    | 2020-04-01 |
| Flu Study                                                                       | Seattle Flu Study                                | Chu et al                                           | Seattle    |
| EPI_ISL_430131                                                                  | hCoV-19/USA/WA-S277/2020                         | North America / USA / Washington / King County      | 2020-02-22 |
| Seattle Flu Study                                                               | Seattle Flu Study                                | Chu et al                                           |            |
| EPI_ISL_430132                                                                  | hCoV-19/USA/WA-S278/2020                         | North America / USA / Washington                    | 2020-03-17 |
| Flu Study                                                                       | Seattle Flu Study                                | Chu et al                                           | Seattle    |
| EPI_ISL_430133                                                                  | hCoV-19/USA/WA-S279/2020                         | North America / USA / Washington / King County      | 2020-03-04 |
| Seattle Flu Study                                                               | Seattle Flu Study                                | Chu et al                                           |            |
| EPI_ISL_430134                                                                  | hCoV-19/USA/WA-S280/2020                         | North America / USA / Washington / King County      | 2020-03-09 |
| Seattle Flu Study                                                               | Seattle Flu Study                                | Chu et al                                           |            |
| EPI_ISL_430135                                                                  | hCoV-19/USA/WA-S281/2020                         | North America / USA / Washington / King County      | 2020-02-29 |
| Seattle Flu Study                                                               | Seattle Flu Study                                | Chu et al                                           |            |
| EPI_ISL_430136                                                                  | hCoV-19/USA/WA-S282/2020                         | North America / USA / Washington / King County      | 2020-03-10 |
| Seattle Flu Study                                                               | Seattle Flu Study                                | Chu et al                                           |            |
| EPI_ISL_430137                                                                  | hCoV-19/USA/WA-S283/2020                         | North America / USA / Washington / King County      | 2020-03-21 |
| Seattle Flu Study                                                               | Seattle Flu Study                                | Chu et al                                           |            |
| EPI_ISL_430140                                                                  | hCoV-19/USA/WA-S286/2020                         | North America / USA / Washington / Pierce County    | 2020-03-15 |
| Seattle Flu Study                                                               | Seattle Flu Study                                | Chu et al                                           |            |
| EPI_ISL_430141                                                                  | hCoV-19/USA/WA-S287/2020                         | North America / USA / Washington / King County      | 2020-03-06 |
| Seattle Flu Study                                                               | Seattle Flu Study                                | Chu et al                                           |            |







|                                                                                                                                                                                                 |                                                                                                                                         |                                                                                                           |            |                                                                                                                                                                                                                                                                                                                                                                                                        |
|-------------------------------------------------------------------------------------------------------------------------------------------------------------------------------------------------|-----------------------------------------------------------------------------------------------------------------------------------------|-----------------------------------------------------------------------------------------------------------|------------|--------------------------------------------------------------------------------------------------------------------------------------------------------------------------------------------------------------------------------------------------------------------------------------------------------------------------------------------------------------------------------------------------------|
| EPI_ISL_430290                                                                                                                                                                                  | hCoV-19/USA/WA-S252/2020                                                                                                                | North America / USA / Washington / King County                                                            | 2020-03-02 |                                                                                                                                                                                                                                                                                                                                                                                                        |
| Washington State Department of Health                                                                                                                                                           | Seattle                                                                                                                                 | Flu Study                                                                                                 | Chu et al  |                                                                                                                                                                                                                                                                                                                                                                                                        |
| EPI_ISL_430291                                                                                                                                                                                  | hCoV-19/USA/WA-S253/2020                                                                                                                | North America / USA / Washington / Snohomish County                                                       | 2020-03-07 |                                                                                                                                                                                                                                                                                                                                                                                                        |
| Washington State Department of Health                                                                                                                                                           | Seattle                                                                                                                                 | Flu Study                                                                                                 | Chu et al  |                                                                                                                                                                                                                                                                                                                                                                                                        |
| EPI_ISL_430292                                                                                                                                                                                  | hCoV-19/USA/WA-S254/2020                                                                                                                | North America / USA / Washington / Snohomish County                                                       | 2020-02-24 |                                                                                                                                                                                                                                                                                                                                                                                                        |
| Washington State Department of Health                                                                                                                                                           | Seattle                                                                                                                                 | Flu Study                                                                                                 | Chu et al  |                                                                                                                                                                                                                                                                                                                                                                                                        |
| EPI_ISL_430293                                                                                                                                                                                  | hCoV-19/USA/WA-S255/2020                                                                                                                | North America / USA / Washington / Clark County                                                           | 2020-03-08 |                                                                                                                                                                                                                                                                                                                                                                                                        |
| Washington State Department of Health                                                                                                                                                           | Seattle                                                                                                                                 | Flu Study                                                                                                 | Chu et al  |                                                                                                                                                                                                                                                                                                                                                                                                        |
| EPI_ISL_430294                                                                                                                                                                                  | hCoV-19/USA/WA-S256/2020                                                                                                                | North America / USA / Washington / King County                                                            | 2020-03-02 |                                                                                                                                                                                                                                                                                                                                                                                                        |
| Washington State Department of Health                                                                                                                                                           | Seattle                                                                                                                                 | Flu Study                                                                                                 | Chu et al  |                                                                                                                                                                                                                                                                                                                                                                                                        |
| EPI_ISL_430295                                                                                                                                                                                  | hCoV-19/USA/WA-S257/2020                                                                                                                | North America / USA / Washington / King County                                                            | 2020-02-25 |                                                                                                                                                                                                                                                                                                                                                                                                        |
| Washington State Department of Health                                                                                                                                                           | Seattle                                                                                                                                 | Flu Study                                                                                                 | Chu et al  |                                                                                                                                                                                                                                                                                                                                                                                                        |
| EPI_ISL_430297                                                                                                                                                                                  | hCoV-19/South Africa/R02827/2020                                                                                                        | Africa / South Africa / GP                                                                                | 2020-03-06 |                                                                                                                                                                                                                                                                                                                                                                                                        |
| National Institute for Communicable Diseases of the National Health Laboratory Service                                                                                                          | National Institute for Communicable Diseases of the National Health Laboratory Service                                                  | Allam M, Kwenda S, van Heusden P, Khumalo Z, Mohale T, Subramoney K, von Gottberg, A, Ismail A, Bhiman JN |            |                                                                                                                                                                                                                                                                                                                                                                                                        |
| EPI_ISL_450500                                                                                                                                                                                  | hCoV-19/Wuhan/OS52/2020                                                                                                                 | Asia / China / Hubei / Wuhan                                                                              | 2020-01-10 | unknown CAS Key                                                                                                                                                                                                                                                                                                                                                                                        |
| Laboratory of Special Pathogens and Biosafety and Center for Emerging Infectious Diseases                                                                                                       |                                                                                                                                         |                                                                                                           |            | Si,H., Zhu,Y., Lin,H., Xie,S., Shi,Z., Zhou,P.                                                                                                                                                                                                                                                                                                                                                         |
| EPI_ISL_450501                                                                                                                                                                                  | hCoV-19/Wuhan/YB012611/2020                                                                                                             | Asia / China / Hubei / Wuhan                                                                              | 2020-01-26 | unknown CAS Key                                                                                                                                                                                                                                                                                                                                                                                        |
| Laboratory of Special Pathogens and Biosafety and Center for Emerging Infectious Diseases                                                                                                       |                                                                                                                                         |                                                                                                           |            | Si,H., Zhu,Y., Lin,H., Xie,S., Shi,Z., Zhou,P.                                                                                                                                                                                                                                                                                                                                                         |
| EPI_ISL_450502                                                                                                                                                                                  | hCoV-19/Wuhan/YB012605/2020                                                                                                             | Asia / China / Hubei / Wuhan                                                                              | 2020-01-26 | unknown CAS Key                                                                                                                                                                                                                                                                                                                                                                                        |
| Laboratory of Special Pathogens and Biosafety and Center for Emerging Infectious Diseases                                                                                                       |                                                                                                                                         |                                                                                                           |            | Si,H., Zhu,Y., Lin,H., Xie,S., Shi,Z., Zhou,P.                                                                                                                                                                                                                                                                                                                                                         |
| EPI_ISL_450503                                                                                                                                                                                  | hCoV-19/Wuhan/YB012602/2020                                                                                                             | Asia / China / Hubei / Wuhan                                                                              | 2020-01-26 | unknown CAS Key                                                                                                                                                                                                                                                                                                                                                                                        |
| Laboratory of Special Pathogens and Biosafety and Center for Emerging Infectious Diseases                                                                                                       |                                                                                                                                         |                                                                                                           |            | Si,H., Zhu,Y., Lin,H., Xie,S., Shi,Z., Zhou,P.                                                                                                                                                                                                                                                                                                                                                         |
| EPI_ISL_450504                                                                                                                                                                                  | hCoV-19/Wuhan/YB012506/2020                                                                                                             | Asia / China / Hubei / Wuhan                                                                              | 2020-01-25 | unknown CAS Key                                                                                                                                                                                                                                                                                                                                                                                        |
| Laboratory of Special Pathogens and Biosafety and Center for Emerging Infectious Diseases                                                                                                       |                                                                                                                                         |                                                                                                           |            | Si,H., Zhu,Y., Lin,H., Xie,S., Shi,Z., Zhou,P.                                                                                                                                                                                                                                                                                                                                                         |
| EPI_ISL_450506                                                                                                                                                                                  | hCoV-19/Brazil/SP02cc/2020                                                                                                              | South America / Brazil                                                                                    | 2020-03-18 | unknown Clinical                                                                                                                                                                                                                                                                                                                                                                                       |
| Laboratory                                                                                                                                                                                      | Malta,F., Amgarten,D., de Oliveira,D.B.L., Araujo,D.B., Machado,R.R.G., Santana,R.A.F., Manguiera,C.L.P., Durigon,E.L. and Pinho,J.R.R. |                                                                                                           |            |                                                                                                                                                                                                                                                                                                                                                                                                        |
| EPI_ISL_403928                                                                                                                                                                                  | hCoV-19/Wuhan/IPBCAMS-WH-05/2020                                                                                                        | Asia / China / Hubei / Wuhan                                                                              | 2020-01-01 |                                                                                                                                                                                                                                                                                                                                                                                                        |
| Institute of Pathogen Biology, Chinese Academy of Medical Sciences & Peking Union Medical College                                                                                               |                                                                                                                                         |                                                                                                           |            |                                                                                                                                                                                                                                                                                                                                                                                                        |
| Institute of Pathogen Biology, Chinese Academy of Medical Sciences & Peking Union Medical College                                                                                               |                                                                                                                                         |                                                                                                           |            | Lili                                                                                                                                                                                                                                                                                                                                                                                                   |
| Ren, Jianwei Wang, Qi Jin, Zichun Xiang, Zhiqiang Wu, Chao Wu, Yiwei Liu                                                                                                                        |                                                                                                                                         |                                                                                                           |            |                                                                                                                                                                                                                                                                                                                                                                                                        |
| EPI_ISL_403929                                                                                                                                                                                  | hCoV-19/Wuhan/IPBCAMS-WH-04/2019                                                                                                        | Asia / China / Hubei / Wuhan                                                                              | 2019-12-30 |                                                                                                                                                                                                                                                                                                                                                                                                        |
| Institute of Pathogen Biology, Chinese Academy of Medical Sciences & Peking Union Medical College                                                                                               |                                                                                                                                         |                                                                                                           |            |                                                                                                                                                                                                                                                                                                                                                                                                        |
| Institute of Pathogen Biology, Chinese Academy of Medical Sciences & Peking Union Medical College                                                                                               |                                                                                                                                         |                                                                                                           |            | Lili                                                                                                                                                                                                                                                                                                                                                                                                   |
| Ren, Jianwei Wang, Qi Jin, Zichun Xiang, Zhiqiang Wu, Chao Wu, Yiwei Liu                                                                                                                        |                                                                                                                                         |                                                                                                           |            |                                                                                                                                                                                                                                                                                                                                                                                                        |
| EPI_ISL_403930                                                                                                                                                                                  | hCoV-19/Wuhan/IPBCAMS-WH-03/2019                                                                                                        | Asia / China / Hubei / Wuhan                                                                              | 2019-12-30 |                                                                                                                                                                                                                                                                                                                                                                                                        |
| Institute of Pathogen Biology, Chinese Academy of Medical Sciences & Peking Union Medical College                                                                                               |                                                                                                                                         |                                                                                                           |            |                                                                                                                                                                                                                                                                                                                                                                                                        |
| Institute of Pathogen Biology, Chinese Academy of Medical Sciences & Peking Union Medical College                                                                                               |                                                                                                                                         |                                                                                                           |            | Lili                                                                                                                                                                                                                                                                                                                                                                                                   |
| Ren, Jianwei Wang, Qi Jin, Zichun Xiang, Zhiqiang Wu, Chao Wu, Yiwei Liu                                                                                                                        |                                                                                                                                         |                                                                                                           |            |                                                                                                                                                                                                                                                                                                                                                                                                        |
| EPI_ISL_403931                                                                                                                                                                                  | hCoV-19/Wuhan/IPBCAMS-WH-02/2019                                                                                                        | Asia / China / Hubei / Wuhan                                                                              | 2019-12-30 |                                                                                                                                                                                                                                                                                                                                                                                                        |
| Institute of Pathogen Biology, Chinese Academy of Medical Sciences & Peking Union Medical College                                                                                               |                                                                                                                                         |                                                                                                           |            |                                                                                                                                                                                                                                                                                                                                                                                                        |
| Institute of Pathogen Biology, Chinese Academy of Medical Sciences & Peking Union Medical College                                                                                               |                                                                                                                                         |                                                                                                           |            | Lili                                                                                                                                                                                                                                                                                                                                                                                                   |
| Ren, Jianwei Wang, Qi Jin, Zichun Xiang, Zhiqiang Wu, Chao Wu, Yiwei Liu                                                                                                                        |                                                                                                                                         |                                                                                                           |            |                                                                                                                                                                                                                                                                                                                                                                                                        |
| EPI_ISL_403932                                                                                                                                                                                  | hCoV-19/Guangdong/20SF012/2020                                                                                                          | Asia / China / Guangdong / Shenzhen                                                                       | 2020-01-14 |                                                                                                                                                                                                                                                                                                                                                                                                        |
| Guangdong Provincial Center for Diseases Control and Prevention; Guangdong Provincial Public Health Department of Microbiology, Guangdong Provincial Center for Diseases Control and Prevention |                                                                                                                                         |                                                                                                           |            | Min Kang, Jie Wu, Jing Lu, Tao Liu, Baisheng Li, Shujiang Mei, Feng Ruan, Lifeng Lin, Changwen Ke, Haojie Zhong, Yingtao Zhang, Lirong Zou, Xuguang Chen, Qi Zhu, Jianpeng Xiao, Jianxiang Geng, Zhe Liu, Jianxiong Hu, Weilin Zeng, Xing Li, Yuhuang Liao, Xiujian Tang, Songjian Xiao, Ying Wang, Yingchao Song, Xue Zhuang, Lijun Liang, Guanhao He, Huihong Deng, Tie Song, Jianfeng He, Wenjun Ma |
| EPI_ISL_403933                                                                                                                                                                                  | hCoV-19/Guangdong/20SF013/2020                                                                                                          | Asia / China / Guangdong / Shenzhen                                                                       | 2020-01-15 |                                                                                                                                                                                                                                                                                                                                                                                                        |
| Guangdong Provincial Center for Diseases Control and Prevention; Guangdong Provincial Public Health Department of Microbiology, Guangdong Provincial Center for Diseases Control and Prevention |                                                                                                                                         |                                                                                                           |            | Min Kang, Jie Wu, Jing Lu, Tao Liu, Baisheng Li, Shujiang Mei, Feng Ruan, Lifeng Lin, Changwen Ke, Haojie Zhong, Yingtao Zhang, Lirong Zou, Xuguang Chen, Qi Zhu, Jianpeng Xiao, Jianxiang Geng, Zhe Liu, Jianxiong Hu, Weilin Zeng, Xing Li, Yuhuang Liao, Xiujian Tang, Songjian Xiao, Ying Wang, Yingchao Song, Xue Zhuang, Lijun Liang, Guanhao He, Huihong Deng, Tie Song, Jianfeng He, Wenjun Ma |
| EPI_ISL_403934                                                                                                                                                                                  | hCoV-19/Guangdong/20SF014/2020                                                                                                          | Asia / China / Guangdong / Shenzhen                                                                       | 2020-01-15 |                                                                                                                                                                                                                                                                                                                                                                                                        |
| Guangdong Provincial Center for Diseases Control and Prevention; Guangdong Provincial Public Health Department of Microbiology, Guangdong Provincial Center for Diseases Control and Prevention |                                                                                                                                         |                                                                                                           |            | Min Kang, Jie Wu, Jing Lu, Tao Liu, Baisheng Li, Shujiang Mei, Feng Ruan, Lifeng Lin, Changwen Ke, Haojie Zhong, Yingtao Zhang, Lirong Zou, Xuguang Chen, Qi Zhu, Jianpeng Xiao, Jianxiang Geng, Zhe Liu, Jianxiong Hu, Weilin Zeng, Xing Li, Yuhuang Liao, Xiujian Tang, Songjian Xiao, Ying Wang, Yingchao Song, Xue Zhuang, Lijun Liang, Guanhao He, Huihong Deng, Tie Song, Jianfeng He, Wenjun Ma |

He, Huihong Deng, Tie Song, Jianfeng He, Wenjun Ma  
EPI\_ISL\_403935 hCoV-19/Guangdong/20SF025/2020 Asia / China / Guangdong / Shenzhen 2020-01-15  
Guangdong Provincial Center for Diseases Control and Prevention; Guangdong Provincial Public Health  
Department of Microbiology, Guangdong Provincial Center for Diseases Control and Prevention Min Kang, Jie  
Wu, Jing Lu, Tao Liu, Baisheng Li, Shujiang Mei, Feng Ruan, Lifeng Lin, Changwen Ke, Haojie Zhong, Yingtao  
Zhang, Lirong Zou, Xuguang Chen, Qi Zhu, Jianpeng Xiao, Jianxiang Geng, Zhe Liu, Jianxiong Hu, Weilin Zeng,  
Xing Li, Yuhuang Liao, Xiujuan Tang, Songjian Xiao, Ying Wang, Yingchao Song, Xue Zhuang, Lijun Liang, Guanhao  
He, Huihong Deng, Tie Song, Jianfeng He, Wenjun Ma

EPI\_ISL\_403936 hCoV-19/Guangdong/20SF028/2020 Asia / China / Guangdong / Zhuhai 2020-01-17  
Guangdong Provincial Center for Diseases Control and Prevention; Guangdong Provincial Public Health  
Department of Microbiology, Guangdong Provincial Center for Diseases Control and Prevention Min Kang, Jie  
Wu, Jing Lu, Tao Liu, Baisheng Li, Shujiang Mei, Feng Ruan, Lifeng Lin, Changwen Ke, Haojie Zhong, Yingtao  
Zhang, Lirong Zou, Xuguang Chen, Qi Zhu, Jianpeng Xiao, Jianxiang Geng, Zhe Liu, Jianxiong Hu, Weilin Zeng,  
Xing Li, Yuhuang Liao, Xiujuan Tang, Songjian Xiao, Ying Wang, Yingchao Song, Xue Zhuang, Lijun Liang, Guanhao  
He, Huihong Deng, Tie Song, Jianfeng He, Wenjun Ma

EPI\_ISL\_403937 hCoV-19/Guangdong/20SF040/2020 Asia / China / Guangdong / Zhuhai 2020-01-18  
Guangdong Provincial Center for Diseases Control and Prevention; Guangdong Provincial Public Health  
Department of Microbiology, Guangdong Provincial Center for Diseases Control and Prevention Min Kang, Jie  
Wu, Jing Lu, Tao Liu, Baisheng Li, Shujiang Mei, Feng Ruan, Lifeng Lin, Changwen Ke, Haojie Zhong, Yingtao  
Zhang, Lirong Zou, Xuguang Chen, Qi Zhu, Jianpeng Xiao, Jianxiang Geng, Zhe Liu, Jianxiong Hu, Weilin Zeng,  
Xing Li, Yuhuang Liao, Xiujuan Tang, Songjian Xiao, Ying Wang, Yingchao Song, Xue Zhuang, Lijun Liang, Guanhao  
He, Huihong Deng, Tie Song, Jianfeng He, Wenjun Ma

EPI\_ISL\_403962 hCoV-19/Thailand/61/2020 Asia / Thailand / Nonthaburi 2020-01-08 Bamrasnaradura  
Hospital 1. Department of Medical Sciences, Ministry of Public Health, Thailand 2. Thai Red Cross  
Emerging Infectious Diseases - Health Science Centre 3. Department of Disease Control, Ministry of Public  
Health, Thailand Pilailuk,Okada; Siripaporn,Phuygun; Thanutsapa,Thanadachakul;  
Supaporn,Wacharapluesadee; Sittiporn,Parnmen; Warawan,Wongboot; Sunthareeya,Waicharoen; Rome,Buathong;  
Malinee,Chittaganpitch; Nanthawan,Mekha

EPI\_ISL\_403963 hCoV-19/Thailand/74/2020 Asia / Thailand / Nonthaburi 2020-01-13 Bamrasnaradura  
Hospital 1. Department of Medical Sciences, Ministry of Public Health, Thailand 2. Thai Red Cross  
Emerging Infectious Diseases - Health Science Centre 3. Department of Disease Control, Ministry of Public  
Health, Thailand Pilailuk,Okada; Siripaporn,Phuygun; Thanutsapa,Thanadachakul;  
Supaporn,Wacharapluesadee; Sittiporn,Parnmen; Warawan,Wongboot; Sunthareeya,Waicharoen; Rome,Buathong;  
Malinee,Chittaganpitch; Nanthawan,Mekha

EPI\_ISL\_406223 hCoV-19/USA/AZ1/2020 North America / USA / Arizona / Phoenix 2020-01-22 Arizona  
Department of Health Services Pathogen Discovery, Respiratory Viruses Branch, Division of Viral Diseases,  
Centers for Disease Control and Prevention Ying Tao, Clinton R. Paden, Krista Queen, Anna Uehara, Yan Li,  
Jing Zhang, Xiaoyan Lu, Brian Lynch, Senthil Kumar K. Sakthivel, Brett L. Whitaker, Shifaq Kamili, Lijuan Wang,  
Janna' R. Murray, Susan I. Gerber, Stephen Lindstrom, Suxiang Tong

EPI\_ISL\_406592 hCoV-19/Shenzhen/SZTH-001/2020 Asia / China / Guangdong / Shenzhen 2020-01-13  
Shenzhen Third People's Hospital Shenzhen Key Laboratory of Pathogen and Immunity, National Clinical  
Research Center for Infectious Disease, Shenzhen Third People's Hospital Yang Yang, Chenguang Shen, Li Xing,  
Zhixiang Xu, Haixia Zheng, Yingxia Liu

EPI\_ISL\_406593 hCoV-19/Shenzhen/SZTH-002/2020 Asia / China / Guangdong / Shenzhen 2020-01-13  
Shenzhen Key Laboratory of Pathogen and Immunity, National Clinical Research Center for Infectious Disease,  
Shenzhen Third People's Hospital Shenzhen Key Laboratory of Pathogen and Immunity, National Clinical  
Research Center for Infectious Disease, Shenzhen Third People's Hospital Yang Yang, Chenguang Shen, Li  
Xing, Zhixiang Xu, Haixia Zheng, Yingxia Liu

EPI\_ISL\_406594 hCoV-19/Shenzhen/SZTH-003/2020 Asia / China / Guangdong / Shenzhen 2020-01-16  
Shenzhen Key Laboratory of Pathogen and Immunity, National Clinical Research Center for Infectious Disease,  
Shenzhen Third People's Hospital Shenzhen Key Laboratory of Pathogen and Immunity, National Clinical  
Research Center for Infectious Disease, Shenzhen Third People's Hospital Yang Yang, Chenguang Shen, Li  
Xing, Zhixiang Xu, Haixia Zheng, Yingxia Liu

EPI\_ISL\_406595 hCoV-19/Shenzhen/SZTH-004/2020 Asia / China / Guangdong / Shenzhen 2020-01-16  
Shenzhen Key Laboratory of Pathogen and Immunity, National Clinical Research Center for Infectious Disease,  
Shenzhen Third People's Hospital Shenzhen Key Laboratory of Pathogen and Immunity, National Clinical  
Research Center for Infectious Disease, Shenzhen Third People's Hospital Yang Yang, Chenguang Shen, Li  
Xing, Zhixiang Xu, Haixia Zheng, Yingxia Liu

EPI\_ISL\_406596 hCoV-19/France/IDF0372/2020 Europe / France / Ile-de-France / Paris 2020-01-23  
Department of Infectious and Tropical Diseases, Bichat Claude Bernard Hospital, Paris National Reference  
Center for Viruses of Respiratory Infections, Institut Pasteur, Paris Mélanie Albert, Marion Barbet, Sylvie  
Behillil, Méline Bizard, Angela Brisebarre, Flora Donati, Vincent Enouf, Maud Vanpeene, Sylvie van der Werf,  
Yazdan Yazdanpanah, Xavier Lescure.

EPI\_ISL\_406597 hCoV-19/France/IDF0373/2020 Europe / France / Ile-de-France / Paris 2020-01-23  
Department of Infectious and Tropical Diseases, Bichat Claude Bernard Hospital, Paris National Reference  
Center for Viruses of Respiratory Infections, Institut Pasteur, Paris Mélanie Albert, Marion Barbet, Sylvie  
Behillil, Méline Bizard, Angela Brisebarre, Flora Donati, Vincent Enouf, Maud Vanpeene, Sylvie van der Werf,  
Yazdan Yazdanpanah, Xavier Lescure.

EPI\_ISL\_407893 hCoV-19/Australia/NSW01/2020 Oceania / Australia / New South Wales / Sydney 2020-01-24  
Centre for Infectious Diseases and Microbiology Laboratory Services NSW Health Pathology - Institute of



Eden J-S, Carter I, Rahman H, Holmes EC, Rockett R, O'Sullivan MV, Sintchenko V, Chen SC, Maddocks S, Kok J and Dwyer DE for the 2019-nCoV Study Group

EPI\_ISL\_407894 hCoV-19/Australia/QLD01/2020 Oceania / Australia / Queensland / Gold Coast 2020-01-28  
 Pathology Queensland Public Health Virology Laboratory Ben Huang, Alyssa Pyke, Amanda De Jong, Andrew Van Den Hurk, Carmel Taylor, David Warrilow, Doris Genge, Elisabeth Gamez, Glen Hewitson, Ian Maxwell Mackay, Inga Sultana, Jamie McMahon, Jean Barcelon, Judy Northill, Mitchell Finger, Natalie Simpson, Neelima Nair, Peter Burtonclay, Peter Moore, Sarah Wheatley, Sean Moody, Sonja Hall-Mendelin, Timothy Gardam, and Frederick Moore.

EPI\_ISL\_407896 hCoV-19/Australia/QLD02/2020 Oceania / Australia / Queensland / Gold Coast 2020-01-30  
 Pathology Queensland Public Health Virology Laboratory Ben Huang, Alyssa Pyke, Amanda De Jong, Andrew Van Den Hurk, Carmel Taylor, David Warrilow, Doris Genge, Elisabeth Gamez, Glen Hewitson, Ian Maxwell Mackay, Inga Sultana, Jamie McMahon, Jean Barcelon, Judy Northill, Mitchell Finger, Natalie Simpson, Neelima Nair, Peter Burtonclay, Peter Moore, Sarah Wheatley, Sean Moody, Sonja Hall-Mendelin, Timothy Gardam, and Frederick Moore.

EPI\_ISL\_411060 hCoV-19/Fujian/8/2020 Asia / China / Fujian 2020-01-21 Fujian Center for Disease Control and Prevention Fujian Center for Disease Control and Prevention Chen Wei, Zhang Yanhua, He Wenxiang, Weng Yuwei

EPI\_ISL\_411066 hCoV-19/Fujian/13/2020 Asia / China / Fujian 2020-01-22 Fujian Center for Disease Control and Prevention Fujian Center for Disease Control and Prevention Chen Wei, Zhang Yanhua, He Wenxiang, Weng Yuwei

EPI\_ISL\_412026 hCoV-19/Hefei/2/2020 Asia / China / Anhui / Hefei 2020-02-23 Second Hospital of Anhui Medical University Second Hospital of Anhui Medical University Changtai Wang, Zhongping Liua, Zixiang Chen, Xin Huang, Mengyuan Xua, Tengfei He, Mengji Lu, Zhenhua Zhang

EPI\_ISL\_412028 hCoV-19/Hong Kong/VM20001061-2/2020 Asia / Hong Kong 2020-01-22 Hong Kong Department of Health School of Public Health, The University of Hong Kong Dominic N.C. Tsang, Daniel K.W. Chu, Leo L.M. Poon, Malik Peiris

EPI\_ISL\_412029 hCoV-19/Hong Kong/VB20024950-2/2020 Asia / Hong Kong 2020-01-30 Hong Kong Department of Health The University of Hong Kong Dominic N.C. Tsang, Daniel K.W. Chu, Leo L.M. Poon, Malik Peiris

EPI\_ISL\_412030 hCoV-19/Hong Kong/VB20026565-2/2020 Asia / Hong Kong 2020-02-01 Hong Kong Department of Health School of Public Health, The University of Hong Kong Dominic N.C. Tsang, Daniel K.W. Chu, Leo L.M. Poon, Malik Peiris

EPI\_ISL\_413602 hCoV-19/Finland/FIN03032020A/2020 Europe / Finland / Helsinki 2020-03-03 Department of Virology and Immunology, University of Helsinki and Helsinki University Hospital, Huslab Finland Department of Virology, Faculty of Medicine, University of Helsinki, Helsinki, Finland Teemu Smura, Hannimari Kallio-Kokko, Olli Vapalahti

EPI\_ISL\_413603 hCoV-19/Finland/FIN03032020B/2020 Europe / Finland / Helsinki 2020-03-03 Department of Virology and Immunology, University of Helsinki and Helsinki University Hospital, Huslab Finland Department of Virology, Faculty of Medicine, University of Helsinki, Helsinki, Finland Teemu Smura, Hannimari Kallio-Kokko, Olli Vapalahti

EPI\_ISL\_413604 hCoV-19/Finland/FIN03032020C/2020 Europe / Finland / Helsinki 2020-03-03 Department of Virology and Immunology, University of Helsinki and Helsinki University Hospital, Huslab Finland Department of Virology, Faculty of Medicine, University of Helsinki, Helsinki, Finland Teemu Smura, Hannimari Kallio-Kokko, Olli Vapalahti

EPI\_ISL\_413606 hCoV-19/USA/CruiseA-1/2020 North America / USA 2020-02-17 unknown Pathogen Discovery, Respiratory Viruses Branch, Division of Viral Diseases, Centers for Diseases Control and Prevention Anna Uehara, Ying Tao, Clinton R. Paden, Krista Queen, Jing Zhang, Yan Li, Mary S. Keckler, Alison S Laufer Halpin, Haibin Wang, Jasmine Padilla, Justin Lee, Christopher A. Elkins, Susan I. Gerber, Suxiang Tong

EPI\_ISL\_413607 hCoV-19/USA/CruiseA-2/2020 North America / USA 2020-02-18 unknown Pathogen Discovery, Respiratory Viruses Branch, Division of Viral Diseases, Centers for Diseases Control and Prevention Anna Uehara, Ying Tao, Clinton R. Paden, Krista Queen, Jing Zhang, Yan Li, Mary S. Keckler, Alison S Laufer Halpin, Haibin Wang, Jasmine Padilla, Justin Lee, Christopher A. Elkins, Susan I. Gerber, Suxiang Tong

EPI\_ISL\_413608 hCoV-19/USA/CruiseA-3/2020 North America / USA 2020-02-18 unknown Pathogen Discovery, Respiratory Viruses Branch, Division of Viral Diseases, Centers for Diseases Control and Prevention Anna Uehara, Ying Tao, Clinton R. Paden, Krista Queen, Jing Zhang, Yan Li, Mary S. Keckler, Alison S Laufer Halpin, Haibin Wang, Jasmine Padilla, Justin Lee, Christopher A. Elkins, Susan I. Gerber, Suxiang Tong

EPI\_ISL\_413609 hCoV-19/USA/CruiseA-4/2020 North America / USA 2020-02-21 unknown Pathogen Discovery, Respiratory Viruses Branch, Division of Viral Diseases, Centers for Diseases Control and Prevention Anna Uehara, Ying Tao, Clinton R. Paden, Krista Queen, Jing Zhang, Yan Li, Mary S. Keckler, Alison S Laufer Halpin, Haibin Wang, Jasmine Padilla, Justin Lee, Christopher A. Elkins, Susan I. Gerber, Suxiang Tong

EPI\_ISL\_413610 hCoV-19/USA/CruiseA-5/2020 North America / USA 2020-02-21 unknown Pathogen Discovery, Respiratory Viruses Branch, Division of Viral Diseases, Centers for Diseases Control and Prevention Anna Uehara, Ying Tao, Clinton R. Paden, Krista Queen, Jing Zhang, Yan Li, Mary S. Keckler, Alison S Laufer Halpin, Haibin Wang, Jasmine Padilla, Justin Lee, Christopher A. Elkins, Susan I. Gerber, Suxiang Tong

EPI\_ISL\_413611 hCoV-19/USA/CruiseA-6/2020 North America / USA 2020-02-21 unknown Pathogen Discovery, Respiratory Viruses Branch, Division of Viral Diseases, Centers for Diseases Control and Prevention Anna Uehara, Ying Tao, Clinton R. Paden, Krista Queen, Jing Zhang, Yan Li, Mary S. Keckler, Alison S Laufer Halpin, Haibin Wang, Jasmine Padilla, Justin Lee, Christopher A. Elkins, Susan I. Gerber, Suxiang Tong

EPI\_ISL\_413612 hCoV-19/USA/CruiseA-7/2020 North America / USA 2020-02-17 unknown Pathogen Discovery, Respiratory Viruses Branch, Division of Viral Diseases, Centers for Diseases Control and Prevention Anna Uehara, Ying Tao, Clinton R. Paden, Krista Queen, Jing Zhang, Yan Li, Mary S. Keckler, Alison S Laufer Halpin, Haibin Wang, Jasmine Padilla, Justin Lee, Christopher A. Elkins, Susan I. Gerber, Suxiang Tong

Discovery, Respiratory Viruses Branch, Division of Viral Diseases, Centers for Diseases Control and Prevention  
Ying Tao, Clinton R. Paden, Krista Queen, Anna Uehara, Jing Zhang, Yan Li, Haibin Wang, Shifaq Kamili, Xiaoyan Lu, Brian Lynch, Senthil Kumar K. Sakthivel, Brett L. Whitaker, Lijuan Wang, Janna' R. Murray, Jasmine Padilla, Justin Lee, Susan I. Gerber, Stephen Lindstrom, Suxiang Tong  
EPI\_ISL\_413613 hCoV-19/USA/CruiseA-8/2020 North America / USA 2020-02-17 unknown Pathogen

Discovery, Respiratory Viruses Branch, Division of Viral Diseases, Centers for Diseases Control and Prevention  
Ying Tao, Clinton R. Paden, Krista Queen, Anna Uehara, Jing Zhang, Yan Li, Haibin Wang, Shifaq Kamili, Xiaoyan Lu, Brian Lynch, Senthil Kumar K. Sakthivel, Brett L. Whitaker, Lijuan Wang, Janna' R. Murray, Jasmine Padilla, Justin Lee, Susan I. Gerber, Stephen Lindstrom, Suxiang Tong  
EPI\_ISL\_413614 hCoV-19/USA/CruiseA-9/2020 North America / USA 2020-02-17 unknown Pathogen

Discovery, Respiratory Viruses Branch, Division of Viral Diseases, Centers for Diseases Control and Prevention  
Ying Tao, Clinton R. Paden, Krista Queen, Anna Uehara, Jing Zhang, Yan Li, Haibin Wang, Shifaq Kamili, Xiaoyan Lu, Brian Lynch, Senthil Kumar K. Sakthivel, Brett L. Whitaker, Lijuan Wang, Janna' R. Murray, Jasmine Padilla, Justin Lee, Susan I. Gerber, Stephen Lindstrom, Suxiang Tong  
EPI\_ISL\_413615 hCoV-19/USA/CruiseA-10/2020 North America / USA 2020-02-17 unknown Pathogen

Discovery, Respiratory Viruses Branch, Division of Viral Diseases, Centers for Diseases Control and Prevention  
Ying Tao, Clinton R. Paden, Krista Queen, Anna Uehara, Jing Zhang, Yan Li, Haibin Wang, Shifaq Kamili, Xiaoyan Lu, Brian Lynch, Senthil Kumar K. Sakthivel, Brett L. Whitaker, Lijuan Wang, Janna' R. Murray, Jasmine Padilla, Justin Lee, Susan I. Gerber, Stephen Lindstrom, Suxiang Tong  
EPI\_ISL\_413616 hCoV-19/USA/CruiseA-11/2020 North America / USA 2020-02-17 unknown Pathogen

Discovery, Respiratory Viruses Branch, Division of Viral Diseases, Centers for Diseases Control and Prevention  
Ying Tao, Clinton R. Paden, Krista Queen, Anna Uehara, Jing Zhang, Yan Li, Haibin Wang, Shifaq Kamili, Xiaoyan Lu, Brian Lynch, Senthil Kumar K. Sakthivel, Brett L. Whitaker, Lijuan Wang, Janna' R. Murray, Jasmine Padilla, Justin Lee, Susan I. Gerber, Stephen Lindstrom, Suxiang Tong  
EPI\_ISL\_413617 hCoV-19/USA/CruiseA-12/2020 North America / USA 2020-02-20 unknown Pathogen

Discovery, Respiratory Viruses Branch, Division of Viral Diseases, Centers for Diseases Control and Prevention  
Ying Tao, Clinton R. Paden, Krista Queen, Anna Uehara, Jing Zhang, Yan Li, Haibin Wang, Shifaq Kamili, Xiaoyan Lu, Brian Lynch, Senthil Kumar K. Sakthivel, Brett L. Whitaker, Lijuan Wang, Janna' R. Murray, Jasmine Padilla, Justin Lee, Susan I. Gerber, Stephen Lindstrom, Suxiang Tong  
EPI\_ISL\_413618 hCoV-19/USA/CruiseA-13/2020 North America / USA 2020-02-20 unknown Pathogen

Discovery, Respiratory Viruses Branch, Division of Viral Diseases, Centers for Diseases Control and Prevention  
Clinton R. Paden, Ying Tao, Krista Queen, Anna Uehara, Jing Zhang, Yan Li, Haibin Wang, Shifaq Kamili, Xiaoyan Lu, Brian Lynch, Senthil Kumar K. Sakthivel, Brett L. Whitaker, Lijuan Wang, Janna' R. Murray, Jasmine Padilla, Justin Lee, Susan I. Gerber, Stephen Lindstrom, Suxiang Tong  
EPI\_ISL\_413619 hCoV-19/USA/CruiseA-14/2020 North America / USA 2020-02-25 unknown Pathogen

Discovery, Respiratory Viruses Branch, Division of Viral Diseases, Centers for Diseases Control and Prevention  
Clinton R. Paden, Ying Tao, Krista Queen, Anna Uehara, Jing Zhang, Yan Li, Haibin Wang, Shifaq Kamili, Xiaoyan Lu, Brian Lynch, Senthil Kumar K. Sakthivel, Brett L. Whitaker, Lijuan Wang, Janna' R. Murray, Jasmine Padilla, Justin Lee, Susan I. Gerber, Stephen Lindstrom, Suxiang Tong  
EPI\_ISL\_413620 hCoV-19/USA/CruiseA-15/2020 North America / USA 2020-02-18 unknown Pathogen

Discovery, Respiratory Viruses Branch, Division of Viral Diseases, Centers for Diseases Control and Prevention  
Clinton R. Paden, Ying Tao, Krista Queen, Anna Uehara, Jing Zhang, Yan Li, Haibin Wang, Shifaq Kamili, Xiaoyan Lu, Brian Lynch, Senthil Kumar K. Sakthivel, Brett L. Whitaker, Lijuan Wang, Janna' R. Murray, Jasmine Padilla, Justin Lee, Susan I. Gerber, Stephen Lindstrom, Suxiang Tong  
EPI\_ISL\_413621 hCoV-19/USA/CruiseA-16/2020 North America / USA 2020-02-18 unknown Pathogen

Discovery, Respiratory Viruses Branch, Division of Viral Diseases, Centers for Diseases Control and Prevention  
Clinton R. Paden, Ying Tao, Krista Queen, Anna Uehara, Jing Zhang, Yan Li, Haibin Wang, Shifaq Kamili, Xiaoyan Lu, Brian Lynch, Senthil Kumar K. Sakthivel, Brett L. Whitaker, Lijuan Wang, Janna' R. Murray, Jasmine Padilla, Justin Lee, Susan I. Gerber, Stephen Lindstrom, Suxiang Tong  
EPI\_ISL\_413622 hCoV-19/USA/CruiseA-17/2020 North America / USA 2020-02-24 unknown Pathogen

Discovery, Respiratory Viruses Branch, Division of Viral Diseases, Centers for Diseases Control and Prevention  
Clinton R. Paden, Ying Tao, Krista Queen, Anna Uehara, Jing Zhang, Yan Li, Haibin Wang, Shifaq Kamili, Xiaoyan Lu, Brian Lynch, Senthil Kumar K. Sakthivel, Brett L. Whitaker, Lijuan Wang, Janna' R. Murray, Jasmine Padilla, Justin Lee, Susan I. Gerber, Stephen Lindstrom, Suxiang Tong  
EPI\_ISL\_413623 hCoV-19/USA/CruiseA-18/2020 North America / USA 2020-02-24 unknown Pathogen

Discovery, Respiratory Viruses Branch, Division of Viral Diseases, Centers for Diseases Control and Prevention  
Clinton R. Paden, Ying Tao, Krista Queen, Anna Uehara, Jing Zhang, Yan Li, Haibin Wang, Shifaq Kamili, Xiaoyan Lu, Brian Lynch, Senthil Kumar K. Sakthivel, Brett L. Whitaker, Lijuan Wang, Janna' R. Murray, Jasmine Padilla, Justin Lee, Susan I. Gerber, Stephen Lindstrom, Suxiang Tong  
EPI\_ISL\_413647 hCoV-19/Portugal/CV62/2020 Europe / Portugal 2020-03-01 Centro Hospital do Porto, E.P.E. - H. Geral de Santo Antonio Instituto Nacional de Saude (INSA) Raquel Guiomar, Inês Costa, Pedro Pechirra, Joana Mendonça, Luís Vieira, Helena Ramos, Joana Isidro, Vítor Borges, João Paulo Gomes

EPI\_ISL\_413648 hCoV-19/Portugal/CV63/2020 Europe / Portugal 2020-03-01 Centro Hospitalar e Universitário de Sao Joao, Porto Instituto Nacional de Saude (INSA) Raquel Guiomar, Inês Costa, Pedro Pechirra, Joana Mendonça, Luís Vieira, João Tiago Guimarães, Joana Isidro, Vítor Borges, João Paulo Gomes

EPI\_ISL\_413649 hCoV-19/USA/WA14-UW10/2020 North America / USA / Washington 2020-03-05 UW Virology Lab UW Virology Lab Pavitra Roychoudhury, Hong Xie, Keith Jerome, Alexander Greninger

EPI\_ISL\_413650 hCoV-19/USA/WA15-UW11/2020 North America / USA / Washington 2020-03-05 UW Virology Lab UW Virology Lab Pavitra Roychoudhury, Hong Xie, Keith Jerome, Alexander Greninger

EPI\_ISL\_413651 hCoV-19/USA/WA16-UW12/2020 North America / USA / Washington 2020-03-05 UW Virology Lab UW Virology Lab Pavitra Roychoudhury, Hong Xie, Keith Jerome, Alexander Greninger

|                |                                                                                                      |                                                     |            |                                                                                                                                                                                   |
|----------------|------------------------------------------------------------------------------------------------------|-----------------------------------------------------|------------|-----------------------------------------------------------------------------------------------------------------------------------------------------------------------------------|
| Virology Lab   | UW Virology Lab Pavitra Roychoudhury, Hong Xie, Keith Jerome, Alexander Greninger                    |                                                     |            |                                                                                                                                                                                   |
| EPI_ISL_413652 | hCoV-19/USA/WA17-UW13/2020                                                                           | North America / USA / Washington                    | 2020-03-05 | UW                                                                                                                                                                                |
| Virology Lab   | UW Virology Lab Pavitra Roychoudhury, Hong Xie, Keith Jerome, Alexander Greninger                    |                                                     |            |                                                                                                                                                                                   |
| EPI_ISL_413653 | hCoV-19/USA/WA18-UW14/2020                                                                           | North America / USA / Washington                    | 2020-03-05 | UW                                                                                                                                                                                |
| Virology Lab   | UW Virology Lab Pavitra Roychoudhury, Hong Xie, Keith Jerome, Alexander Greninger                    |                                                     |            |                                                                                                                                                                                   |
| EPI_ISL_413691 | hCoV-19/China/WF0001/2020                                                                            | Asia / China                                        | 2020-01    | Weifang Center for Disease Control and Prevention                                                                                                                                 |
|                | Weifang Center for Disease Control and Prevention & BGI-Shenzhen                                     |                                                     |            | Qing Nie, Xingguang Li, Erik M Volz, Han Fu, Haowei Wang, Xiaoyue Xi, Wei Chen, Dehui Liu, Yingying Chen, Mengmeng Tian, Wei Tan, Junjie Zai, Wanying Sun, Jiandong Li, Junhua Li |
| EPI_ISL_413692 | hCoV-19/China/WF0002/2020                                                                            | Asia / China                                        | 2020-01    | Weifang Center for Disease Control and Prevention                                                                                                                                 |
|                | Weifang Center for Disease Control and Prevention & BGI-Shenzhen                                     |                                                     |            | Qing Nie, Xingguang Li, Erik M Volz, Han Fu, Haowei Wang, Xiaoyue Xi, Wei Chen, Dehui Liu, Yingying Chen, Mengmeng Tian, Wei Tan, Junjie Zai, Wanying Sun, Jiandong Li, Junhua Li |
| EPI_ISL_413693 | hCoV-19/China/WF0003/2020                                                                            | Asia / China                                        | 2020-01    | Weifang Center for Disease Control and Prevention                                                                                                                                 |
|                | Weifang Center for Disease Control and Prevention & BGI-Shenzhen                                     |                                                     |            | Qing Nie, Xingguang Li, Erik M Volz, Han Fu, Haowei Wang, Xiaoyue Xi, Wei Chen, Dehui Liu, Yingying Chen, Mengmeng Tian, Wei Tan, Junjie Zai, Wanying Sun, Jiandong Li, Junhua Li |
| EPI_ISL_413694 | hCoV-19/China/WF0004/2020                                                                            | Asia / China                                        | 2020-01    | Weifang Center for Disease Control and Prevention                                                                                                                                 |
|                | Weifang Center for Disease Control and Prevention & BGI-Shenzhen                                     |                                                     |            | Qing Nie, Xingguang Li, Erik M Volz, Han Fu, Haowei Wang, Xiaoyue Xi, Wei Chen, Dehui Liu, Yingying Chen, Mengmeng Tian, Wei Tan, Junjie Zai, Wanying Sun, Jiandong Li, Junhua Li |
| EPI_ISL_413697 | hCoV-19/China/WF0012/2020                                                                            | Asia / China                                        | 2020-02    | Weifang Center for Disease Control and Prevention                                                                                                                                 |
|                | Weifang Center for Disease Control and Prevention & BGI-Shenzhen                                     |                                                     |            | Qing Nie, Xingguang Li, Erik M Volz, Han Fu, Haowei Wang, Xiaoyue Xi, Wei Chen, Dehui Liu, Yingying Chen, Mengmeng Tian, Wei Tan, Junjie Zai, Wanying Sun, Jiandong Li, Junhua Li |
| EPI_ISL_414600 | hCoV-19/France/GE1583/2020                                                                           | Europe / France / Grand-Est / Strasbourg            | 2020-02-26 |                                                                                                                                                                                   |
|                | Laboratoire de Virologie Institut de Virologie - INSERM U 1109 Hôpitaux Universitaires de Strasbourg |                                                     |            |                                                                                                                                                                                   |
|                | National Reference Center for Viruses of Respiratory Infections, Institut Pasteur, Paris             |                                                     |            | Mélnie Albert, Marion Barbet, Sylvie Behillil, Méline Bizard, Angela Brisebarre, Flora Donati Vincent Enouf, Maud Vanpeene, Sylvie van der Werf, Samira Fafi-Kremer               |
| EPI_ISL_414620 | hCoV-19/USA/WA-UW33/2020                                                                             | North America / USA                                 | 2020-03-08 | UW Virology Lab UW                                                                                                                                                                |
| Virology Lab   | Pavitra Roychoudhury, Hong Xie, Keith Jerome, Alexander Greninger                                    |                                                     |            |                                                                                                                                                                                   |
| EPI_ISL_414625 | hCoV-19/France/PL1643/2020                                                                           | Europe / France / Pays de la Loire / Nantes         | 2020-02-26 |                                                                                                                                                                                   |
|                | Centre Hospitalier Régional Universitaire de Nantes Laboratoire de Virologie                         |                                                     |            | National Reference Center for Viruses of Respiratory Infections, Institut Pasteur, Paris                                                                                          |
|                |                                                                                                      |                                                     |            | Mélnie Albert, Marion Barbet, Sylvie Behillil, Méline Bizard, Angela Brisebarre, Flora Donati Vincent Enouf, Maud Vanpeene, Sylvie van der Werf, Marianne Coste-Burel             |
| EPI_ISL_414626 | hCoV-19/France/HF1684/2020                                                                           | Europe / France / Hauts de France / Crépy en Valois | 2020-02-29 | unknown                                                                                                                                                                           |
|                | National Reference Center for Viruses of Respiratory Infections, Institut Pasteur, Paris             |                                                     |            |                                                                                                                                                                                   |
|                |                                                                                                      |                                                     |            | Mélnie Albert, Marion Barbet, Sylvie Behillil, Méline Bizard, Angela Brisebarre, Flora Donati Vincent Enouf, Maud Vanpeene, Sylvie van der Werf                                   |
| EPI_ISL_414627 | hCoV-19/France/HF1795/2020                                                                           | Europe / France / Hauts de France / Compiègne       | 2020-03-02 |                                                                                                                                                                                   |
|                | Centre Hospitalier Compiègne Laboratoire de Biologie                                                 |                                                     |            | National Reference Center for Viruses of Respiratory Infections, Institut Pasteur, Paris                                                                                          |
|                |                                                                                                      |                                                     |            | Mélnie Albert, Marion Barbet, Sylvie Behillil, Méline Bizard, Angela Brisebarre, Flora Donati Vincent Enouf, Maud Vanpeene, Sylvie van der Werf, Raulin Olivia                    |
| EPI_ISL_414628 | hCoV-19/France/HF1805/2020                                                                           | Europe / France / Hauts de France / Compiègne       | 2020-03-02 |                                                                                                                                                                                   |
|                | Centre Hospitalier Compiègne Laboratoire de Biologie                                                 |                                                     |            | National Reference Center for Viruses of Respiratory Infections, Institut Pasteur, Paris                                                                                          |
|                |                                                                                                      |                                                     |            | Mélnie Albert, Marion Barbet, Sylvie Behillil, Méline Bizard, Angela Brisebarre, Flora Donati Vincent Enouf, Maud Vanpeene, Sylvie van der Werf, Raulin Olivia                    |
| EPI_ISL_414629 | hCoV-19/France/HF1870/2020                                                                           | Europe / France / Hauts de France / Compiègne       | 2020-03-03 |                                                                                                                                                                                   |
|                | Centre Hospitalier Compiègne Laboratoire de Biologie                                                 |                                                     |            | National Reference Center for Viruses of Respiratory Infections, Institut Pasteur, Paris                                                                                          |
|                |                                                                                                      |                                                     |            | Mélnie Albert, Marion Barbet, Sylvie Behillil, Méline Bizard, Angela Brisebarre, Flora Donati Vincent Enouf, Maud Vanpeene, Sylvie van der Werf, Raulin Olivia                    |
| EPI_ISL_414630 | hCoV-19/France/HF1871/2020                                                                           | Europe / France / Hauts de France / Compiègne       | 2020-03-03 |                                                                                                                                                                                   |
|                | Centre Hospitalier Compiègne Laboratoire de Biologie                                                 |                                                     |            | National Reference Center for Viruses of Respiratory Infections, Institut Pasteur, Paris                                                                                          |
|                |                                                                                                      |                                                     |            | Mélnie Albert, Marion Barbet, Sylvie Behillil, Méline Bizard, Angela Brisebarre, Flora Donati Vincent Enouf, Maud Vanpeene, Sylvie van der Werf, Raulin Olivia                    |
| EPI_ISL_414631 | hCoV-19/France/GE1973/2020                                                                           | Europe / France / Grand-Est / Reims                 | 2020-03-04 | Hôpital                                                                                                                                                                           |
|                | Robert Debré Laboratoire de Virologie                                                                |                                                     |            | National Reference Center for Viruses of Respiratory Infections, Institut Pasteur, Paris                                                                                          |
|                |                                                                                                      |                                                     |            | Mélnie Albert, Marion Barbet, Sylvie Behillil, Méline Bizard, Angela Brisebarre, Flora Donati Vincent Enouf, Maud Vanpeene, Sylvie van der Werf, Laurent Andreoletti              |
| EPI_ISL_414632 | hCoV-19/France/GE1977/2020                                                                           | Europe / France / Grand-Est / Reims                 | 2020-03-04 | Hôpital                                                                                                                                                                           |
|                | Robert Debré Laboratoire de Virologie                                                                |                                                     |            | National Reference Center for Viruses of Respiratory Infections, Institut Pasteur, Paris                                                                                          |
|                |                                                                                                      |                                                     |            | Mélnie Albert, Marion Barbet, Sylvie Behillil, Méline Bizard, Angela Brisebarre, Flora Donati Vincent Enouf, Maud Vanpeene, Sylvie van der Werf, Laurent Andreoletti              |
| EPI_ISL_414633 | hCoV-19/France/IDF1980/2020                                                                          | Europe / France / Ile-de-France / Pontoise          | 2020-03-04 |                                                                                                                                                                                   |
|                | Centre Hospitalier René Dubois Laboratoire de Microbiologie - Bât A                                  |                                                     |            | National Reference Center for Viruses of Respiratory Infections, Institut Pasteur, Paris                                                                                          |
|                |                                                                                                      |                                                     |            | Mélnie Albert, Marion Barbet, Sylvie Behillil, Méline Bizard, Angela Brisebarre, Flora Donati Vincent Enouf, Maud Vanpeene, Sylvie van der Werf, Pascale Martres                  |
| EPI_ISL_414634 | hCoV-19/France/HF1986/2020                                                                           | Europe / France / Hauts de France / Compiègne       | 2020-03-04 |                                                                                                                                                                                   |

Centre Hospitalier Compiègne Laboratoire de Biologie National Reference Center for Viruses of Respiratory Infections, Institut Pasteur, Paris Mélnie Albert, Marion Barbet, Sylvie Behillil, Méline Bizard, Angela Brisebarre, Flora Donati Vincent Enouf, Maud Vanpeene, Sylvie van der Werf, Raulin Olivia  
EPI\_ISL\_414635 hCoV-19/France/HF1988/2020 Europe / France / Hauts de France / Compiègne 2020-03-04  
Centre Hospitalier Compiègne Laboratoire de Biologie National Reference Center for Viruses of Respiratory Infections, Institut Pasteur, Paris Mélnie Albert, Marion Barbet, Sylvie Behillil, Méline Bizard, Angela Brisebarre, Flora Donati Vincent Enouf, Maud Vanpeene, Sylvie van der Werf, Raulin Olivia  
EPI\_ISL\_414663 hCoV-19/Guangzhou/GZMU0016/2020 Asia / China / Guangdong / Guangzhou 2020-02-25 State  
Key Laboratory of Respiratory Disease, National Clinical Research Center for Respiratory Disease, Guangzhou Institute of Respiratory Health, the First Affiliated Hospital of Guangzhou Medical University The First Affiliated Hospital of Guangzhou Medical University & BGI-Shenzhen Zhao et al  
EPI\_ISL\_414686 hCoV-19/Guangzhou/GZMU0030/2020 Asia / China / Guangdong / Guangzhou 2020-02-27 State  
Key Laboratory of Respiratory Disease, National Clinical Research Center for Respiratory Disease, Guangzhou Institute of Respiratory Health, the First Affiliated Hospital of Guangzhou Medical University The First Affiliated Hospital of Guangzhou Medical University & BGI-Shenzhen Zhao et al  
EPI\_ISL\_414687 hCoV-19/Guangzhou/GZMU0031/2020 Asia / China / Guangdong / Guangzhou 2020-02-25 State  
Key Laboratory of Respiratory Disease, National Clinical Research Center for Respiratory Disease, Guangzhou Institute of Respiratory Health, the First Affiliated Hospital of Guangzhou Medical University the First Affiliated Hospital of Guangzhou Medical University & BGI-Shenzhen Zhao et al  
EPI\_ISL\_414689 hCoV-19/Guangzhou/GZMU0044/2020 Asia / China / Guangdong / Guangzhou 2020-02-25 State  
Key Laboratory of Respiratory Disease, National Clinical Research Center for Respiratory Disease, Guangzhou Institute of Respiratory Health, the First Affiliated Hospital of Guangzhou Medical University The First Affiliated Hospital of Guangzhou Medical University & BGI-Shenzhen Zhao et al  
EPI\_ISL\_414690 hCoV-19/Guangzhou/GZMU0047/2020 Asia / China / Guangdong / Guangzhou 2020-02-25 State  
Key Laboratory of Respiratory Disease, National Clinical Research Center for Respiratory Disease, Guangzhou Institute of Respiratory Health, the First Affiliated Hospital of Guangzhou Medical University The First Affiliated Hospital of Guangzhou Medical University & BGI-Shenzhen Zhao et al  
EPI\_ISL\_414691 hCoV-19/Guangzhou/GZMU0048/2020 Asia / China / Guangdong / Guangzhou 2020-02-25 State  
Key Laboratory of Respiratory Disease, National Clinical Research Center for Respiratory Disease, Guangzhou Institute of Respiratory Health, the First Affiliated Hospital of Guangzhou Medical University The First Affiliated Hospital of Guangzhou Medical University & BGI-Shenzhen Zhao et al  
EPI\_ISL\_414692 hCoV-19/Guangzhou/GZMU0014/2020 Asia / China / Guangdong / Guangzhou 2020-02-25 State  
Key Laboratory of Respiratory Disease, National Clinical Research Center for Respiratory Disease, Guangzhou Institute of Respiratory Health, the First Affiliated Hospital of Guangzhou Medical University The First Affiliated Hospital of Guangzhou Medical University & BGI-Shenzhen Zhao et al  
EPI\_ISL\_414936 hCoV-19/Shandong/LY003-2/2020 Asia / China / Shandong 2020-01-23 Shandong Provincial Center for Disease Control and Prevention Beijing Institute of Microbiology and Epidemiology Xiao-Lin Jiang, Xiao-Li Zhang, Xiang-Na Zhao, Cun-Bao Li, Jie Lei, Zeng-Qiang Kou, Wen-Kui Sun, Yang Hang, Feng Gao, Sheng-Xiang Ji, Can-Fang Lin, Bo Pang, Ming-Xiao Yao, Guo-Lin Wang, Lin Yao, Li-Jun Duan, Xiao Wei, Dian-Ming Kang, Mai-Juan Ma  
EPI\_ISL\_414937 hCoV-19/Shandong/LY004-2/2020 Asia / China / Shandong 2020-01-26 Shandong Provincial Center for Disease Control and Prevention Beijing Institute of Microbiology and Epidemiology Xiao-Lin Jiang, Xiao-Li Zhang, Xiang-Na Zhao, Cun-Bao Li, Jie Lei, Zeng-Qiang Kou, Wen-Kui Sun, Yang Hang, Feng Gao, Sheng-Xiang Ji, Can-Fang Lin, Bo Pang, Ming-Xiao Yao, Guo-Lin Wang, Lin Yao, Li-Jun Duan, Xiao Wei, Dian-Ming Kang, Mai-Juan Ma  
EPI\_ISL\_414938 hCoV-19/Shandong/LY005-2/2020 Asia / China / Shandong 2020-01-24 Shandong Provincial Center for Disease Control and Prevention Beijing Institute of Microbiology and Epidemiology Xiao-Lin Jiang, Xiao-Li Zhang, Xiang-Na Zhao, Cun-Bao Li, Jie Lei, Zeng-Qiang Kou, Wen-Kui Sun, Yang Hang, Feng Gao, Sheng-Xiang Ji, Can-Fang Lin, Bo Pang, Ming-Xiao Yao, Guo-Lin Wang, Lin Yao, Li-Jun Duan, Xiao Wei, Dian-Ming Kang, Mai-Juan Ma  
EPI\_ISL\_414940 hCoV-19/Shandong/LY007-2/2020 Asia / China / Shandong 2020-01-25 Shandong Provincial Center for Disease Control and Prevention Beijing Institute of Microbiology and Epidemiology Xiao-Lin Jiang, Xiao-Li Zhang, Xiang-Na Zhao, Cun-Bao Li, Jie Lei, Zeng-Qiang Kou, Wen-Kui Sun, Yang Hang, Feng Gao, Sheng-Xiang Ji, Can-Fang Lin, Bo Pang, Ming-Xiao Yao, Guo-Lin Wang, Lin Yao, Li-Jun Duan, Xiao Wei, Dian-Ming Kang, Mai-Juan Ma  
EPI\_ISL\_414941 hCoV-19/Shandong/LY008-2/2020 Asia / China / Shandong 2020-01-30 Shandong Provincial Center for Disease Control and Prevention Beijing Institute of Microbiology and Epidemiology Xiao-Lin Jiang, Xiao-Li Zhang, Xiang-Na Zhao, Cun-Bao Li, Jie Lei, Zeng-Qiang Kou, Wen-Kui Sun, Yang Hang, Feng Gao, Sheng-Xiang Ji, Can-Fang Lin, Bo Pang, Ming-Xiao Yao, Guo-Lin Wang, Lin Yao, Li-Jun Duan, Xiao Wei, Dian-Ming Kang, Mai-Juan Ma  
EPI\_ISL\_415920 hCoV-19/Wales/PHW32/2020 Europe / United Kingdom / Wales 2020-03-12 Wales Specialist Virology Centre Public Health Wales Microbiology Cardiff Catherine Moore, Joanne Watkins, Sally Corden, Tom Connor  
EPI\_ISL\_417200 hCoV-19/USA/WI-UW-06/2020 North America / USA / Wisconsin / Cottage Grove 2020-03-21 University of Wisconsin-Madison AIDS Vaccine Research Laboratories University of Wisconsin-Madison AIDS Vaccine Research Laboratories Gage Moreno, Katarina Braun, et al. AIDS Vaccine Research Laboratories  
EPI\_ISL\_417201 hCoV-19/USA/WI-UW-07/2020 North America / USA / Wisconsin / Madison 2020-03-21 University of Wisconsin-Madison AIDS Vaccine Research Laboratories University of Wisconsin-Madison AIDS Vaccine Research Laboratories Gage Moreno, Katarina Braun, et al. AIDS Vaccine Research Laboratories  
EPI\_ISL\_417202 hCoV-19/USA/WI-UW-08/2020 North America / USA / Wisconsin / Stoughton 2020-03-21

University of Wisconsin-Madison AIDS Vaccine Research Laboratories      University of Wisconsin-Madison AIDS Vaccine Research Laboratories      Gage Moreno, Katarina Braun, et al. AIDS Vaccine Research Laboratories

EPI\_ISL\_417203    hCoV-19/USA/WI-UW-09/2020      North America / USA / Wisconsin / Madison      2020-03-21

University of Wisconsin-Madison AIDS Vaccine Research Laboratories      University of Wisconsin-Madison AIDS Vaccine Research Laboratories      Gage Moreno, Katarina Braun, et al. AIDS Vaccine Research Laboratories

EPI\_ISL\_417204    hCoV-19/USA/WI-UW-10/2020      North America / USA / Wisconsin / Cambridge      2020-03-21

University of Wisconsin-Madison AIDS Vaccine Research Laboratories      University of Wisconsin-Madison AIDS Vaccine Research Laboratories      Gage Moreno, Katarina Braun, et al. AIDS Vaccine Research Laboratories

EPI\_ISL\_417211    hCoV-19/NewZealand/CoV001/2020      Oceania / New Zealand / Otago      2020-03-11      Dunedin Hospital      University of Otago      M.E. Quiñones-Mateu, B. Lawley, J. Grant, R. Harfoot, J. Ussher

EPI\_ISL\_417213    hCoV-19/England/20102068502/2020      Europe / United Kingdom / England      2020-03-01

Respiratory Virus Unit, Microbiology Services Colindale, Public Health England      Respiratory Virus Unit, Microbiology Services Colindale, Public Health England      Monica Galiano, Shahjahan Miah, Angie Lackenby, Omolola Akinbami, Tiina Talts, Leena Bhaw, Richard Myers, Steven Platt, Kirstin Edwards, Jonathan Hubb, Joanna Ellis, Maria Zambon

EPI\_ISL\_417217    hCoV-19/England/20102098802/2020      Europe / United Kingdom / England      2020-03-01

Respiratory Virus Unit, Microbiology Services Colindale, Public Health England      Respiratory Virus Unit, Microbiology Services Colindale, Public Health England      Monica Galiano, Shahjahan Miah, Angie Lackenby, Omolola Akinbami, Tiina Talts, Leena Bhaw, Richard Myers, Steven Platt, Kirstin Edwards, Jonathan Hubb, Joanna Ellis, Maria Zambon

EPI\_ISL\_417220    hCoV-19/England/20104002606/2020      Europe / United Kingdom / England      2020-03-03

Respiratory Virus Unit, Microbiology Services Colindale, Public Health England      Respiratory Virus Unit, Microbiology Services Colindale, Public Health England      Monica Galiano, Shahjahan Miah, Angie Lackenby, Omolola Akinbami, Tiina Talts, Leena Bhaw, Richard Myers, Steven Platt, Kirstin Edwards, Jonathan Hubb, Joanna Ellis, Maria Zambon

EPI\_ISL\_417222    hCoV-19/England/20104003002/2020      Europe / United Kingdom / England      2020-03-04

Respiratory Virus Unit, Microbiology Services Colindale, Public Health England      Respiratory Virus Unit, Microbiology Services Colindale, Public Health England      Monica Galiano, Shahjahan Miah, Angie Lackenby, Omolola Akinbami, Tiina Talts, Leena Bhaw, Richard Myers, Steven Platt, Kirstin Edwards, Jonathan Hubb, Joanna Ellis, Maria Zambon

EPI\_ISL\_417226    hCoV-19/England/20104004902/2020      Europe / United Kingdom / England      2020-03-02

Respiratory Virus Unit, Microbiology Services Colindale, Public Health England      Respiratory Virus Unit, Microbiology Services Colindale, Public Health England      Monica Galiano, Shahjahan Miah, Angie Lackenby, Omolola Akinbami, Tiina Talts, Leena Bhaw, Richard Myers, Steven Platt, Kirstin Edwards, Jonathan Hubb, Joanna Ellis, Maria Zambon

EPI\_ISL\_417227    hCoV-19/England/20104007503/2020      Europe / United Kingdom / England      2020-03-03

Respiratory Virus Unit, Microbiology Services Colindale, Public Health England      Respiratory Virus Unit, Microbiology Services Colindale, Public Health England      Monica Galiano, Shahjahan Miah, Angie Lackenby, Omolola Akinbami, Tiina Talts, Leena Bhaw, Richard Myers, Steven Platt, Kirstin Edwards, Jonathan Hubb, Joanna Ellis, Maria Zambon

EPI\_ISL\_417228    hCoV-19/England/20104008402/2020      Europe / United Kingdom / England      2020-03-03

Respiratory Virus Unit, Microbiology Services Colindale, Public Health England      Respiratory Virus Unit, Microbiology Services Colindale, Public Health England      Monica Galiano, Shahjahan Miah, Angie Lackenby, Omolola Akinbami, Tiina Talts, Leena Bhaw, Richard Myers, Steven Platt, Kirstin Edwards, Jonathan Hubb, Joanna Ellis, Maria Zambon

EPI\_ISL\_417230    hCoV-19/England/20104008702/2020      Europe / United Kingdom / England      2020-03-02

Respiratory Virus Unit, Microbiology Services Colindale, Public Health England      Respiratory Virus Unit, Microbiology Services Colindale, Public Health England      Monica Galiano, Shahjahan Miah, Angie Lackenby, Omolola Akinbami, Tiina Talts, Leena Bhaw, Richard Myers, Steven Platt, Kirstin Edwards, Jonathan Hubb, Joanna Ellis, Maria Zambon

EPI\_ISL\_417231    hCoV-19/England/20104008802/2020      Europe / United Kingdom / England      2020-03-03

Respiratory Virus Unit, Microbiology Services Colindale, Public Health England      Respiratory Virus Unit, Microbiology Services Colindale, Public Health England      Monica Galiano, Shahjahan Miah, Angie Lackenby, Omolola Akinbami, Tiina Talts, Leena Bhaw, Richard Myers, Steven Platt, Kirstin Edwards, Jonathan Hubb, Joanna Ellis, Maria Zambon

EPI\_ISL\_417232    hCoV-19/England/20104008902/2020      Europe / United Kingdom / England      2020-03-04

Respiratory Virus Unit, Microbiology Services Colindale, Public Health England      Respiratory Virus Unit, Microbiology Services Colindale, Public Health England      Monica Galiano, Shahjahan Miah, Angie Lackenby, Omolola Akinbami, Tiina Talts, Leena Bhaw, Richard Myers, Steven Platt, Kirstin Edwards, Jonathan Hubb, Joanna Ellis, Maria Zambon

EPI\_ISL\_417233    hCoV-19/England/20104009002/2020      Europe / United Kingdom / England      2020-03-02

Respiratory Virus Unit, Microbiology Services Colindale, Public Health England      Respiratory Virus Unit, Microbiology Services Colindale, Public Health England      Monica Galiano, Shahjahan Miah, Angie Lackenby, Omolola Akinbami, Tiina Talts, Leena Bhaw, Richard Myers, Steven Platt, Kirstin Edwards, Jonathan Hubb, Joanna Ellis, Maria Zambon

EPI\_ISL\_417234    hCoV-19/England/20104009102/2020      Europe / United Kingdom / England      2020-03-02

Respiratory Virus Unit, Microbiology Services Colindale, Public Health England      Respiratory Virus Unit, Microbiology Services Colindale, Public Health England      Monica Galiano, Shahjahan Miah, Angie Lackenby, Omolola Akinbami, Tiina Talts, Leena Bhaw, Richard Myers, Steven Platt, Kirstin Edwards, Jonathan Hubb, Joanna Ellis, Maria Zambon

|                |                                  |                                                    |            |                                                                                                 |
|----------------|----------------------------------|----------------------------------------------------|------------|-------------------------------------------------------------------------------------------------|
| EPI_ISL_417235 | hCoV-19/England/20104013700/2020 | Europe / United Kingdom / England                  | 2020-03-02 | Respiratory Virus Unit, Microbiology Services Colindale, Public Health England                  |
| EPI_ISL_417236 | hCoV-19/England/20104015302/2020 | Europe / United Kingdom / England                  | 2020-03-01 | Respiratory Virus Unit, Microbiology Services Colindale, Public Health England                  |
| EPI_ISL_417238 | hCoV-19/England/20104035803/2020 | Europe / United Kingdom / England                  | 2020-03-03 | Respiratory Virus Unit, Microbiology Services Colindale, Public Health England                  |
| EPI_ISL_417239 | hCoV-19/England/20106003303/2020 | Europe / United Kingdom / England                  | 2020-03-03 | Respiratory Virus Unit, Microbiology Services Colindale, Public Health England                  |
| EPI_ISL_417240 | hCoV-19/England/20106004803/2020 | Europe / United Kingdom / England                  | 2020-03-03 | Respiratory Virus Unit, Microbiology Services Colindale, Public Health England                  |
| EPI_ISL_417244 | hCoV-19/England/20106005403/2020 | Europe / United Kingdom / England                  | 2020-03-03 | Respiratory Virus Unit, Microbiology Services Colindale, Public Health England                  |
| EPI_ISL_417246 | hCoV-19/England/20106145903/2020 | Europe / United Kingdom / England                  | 2020-03-03 | Respiratory Virus Unit, Microbiology Services Colindale, Public Health England                  |
| EPI_ISL_417248 | hCoV-19/England/20108003302/2020 | Europe / United Kingdom / England                  | 2020-03-03 | Respiratory Virus Unit, Microbiology Services Colindale, Public Health England                  |
| EPI_ISL_418182 | hCoV-19/Spain/Madrid_H8_37/2020  | Europe / Spain / Madrid                            | 2020-03-12 | Hospital Universitario 12 de Octubre Hospital Universitario La Paz                              |
| EPI_ISL_418183 | hCoV-19/Hungary/mbl2/2020        | Europe / Hungary / Baranya                         | 2020-03-17 | Virological Research Group, Szentágothai Research Centre                                        |
| EPI_ISL_418184 | hCoV-19/USA/WI-GMF-00018/2020    | North America / USA / Wisconsin / La Crosse County | 2020-03-18 | Gundersen Molecular Diagnostics Laboratory Kabara Cancer Research Institute                     |
| EPI_ISL_418186 | hCoV-19/USA/WI-GMF-00227/2020    | North America / USA / Wisconsin / La Crosse County | 2020-03-23 | Gundersen Molecular Diagnostic Laboratory Kabara Cancer Research Institute                      |
| EPI_ISL_418187 | hCoV-19/USA/WI-GMF-00228/2020    | North America / USA / Wisconsin / La Crosse County | 2020-03-23 | Gundersen Molecular Diagnostics Laboratory Kabara Cancer Research Institute                     |
| EPI_ISL_418188 | hCoV-19/USA/WI-GMF-00232/2020    | North America / USA / Wisconsin / Monroe County    | 2020-03-23 | Gundersen Molecular Diagnostics Laboratory Kabara Cancer Research Institute                     |
| EPI_ISL_418192 | hCoV-19/USA/NY-NYUMC7/2020       | North America / USA / New York / Manhattan         | 2020-03-16 | NYU Langone Health Department of Pathology and Medicine, New York University School of Medicine |
| EPI_ISL_418193 | hCoV-19/USA/NY-NYUMC8/2020       | North America / USA / New York / Manhattan         | 2020-03-17 | NYU Langone Health Department of Pathology and Medicine, New York University School of Medicine |

|                                                                                                                                                                                                                                                                                                                                                               |                |                                                                                          |                                                                                                                                                                                                          |            |          |
|---------------------------------------------------------------------------------------------------------------------------------------------------------------------------------------------------------------------------------------------------------------------------------------------------------------------------------------------------------------|----------------|------------------------------------------------------------------------------------------|----------------------------------------------------------------------------------------------------------------------------------------------------------------------------------------------------------|------------|----------|
| Gael Westby, Paul Zappile                                                                                                                                                                                                                                                                                                                                     | EPI_ISL_418196 | hCoV-19/USA/NY-NYUMC11/2020                                                              | North America / USA / New York / Manhattan                                                                                                                                                               | 2020-03-14 |          |
| NYU Langone Health                                                                                                                                                                                                                                                                                                                                            |                | Department of Pathology and Medicine, New York University School of Medicine             |                                                                                                                                                                                                          |            |          |
| Margaret Black, John Cadley, Paolo Cotzia, John Chen, Dacia Dimartino, Xiaojun Feng, Adriana Heguy, Megan Hogan, Emily Huang, George Jour, Christian Marier, Matthew T. Maurano, Mark J. Mulligan, Peter Meyn, Jared Pinnell, Amy Rapkiewicz, Marie Samanovic-Golden, Antonio Serrano, Guomiao Shen, Matija Snuderl, Nick Vulpescu, Gael Westby, Paul Zappile |                |                                                                                          |                                                                                                                                                                                                          |            |          |
| Gael Westby, Paul Zappile                                                                                                                                                                                                                                                                                                                                     | EPI_ISL_418197 | hCoV-19/USA/NY-NYUMC12/2020                                                              | North America / USA / New York / Manhattan                                                                                                                                                               | 2020-03-15 |          |
| NYU Langone Health                                                                                                                                                                                                                                                                                                                                            |                | Department of Pathology and Medicine, New York University School of Medicine             |                                                                                                                                                                                                          |            |          |
| Margaret Black, John Cadley, Paolo Cotzia, John Chen, Dacia Dimartino, Xiaojun Feng, Adriana Heguy, Megan Hogan, Emily Huang, George Jour, Christian Marier, Matthew T. Maurano, Mark J. Mulligan, Peter Meyn, Jared Pinnell, Amy Rapkiewicz, Marie Samanovic-Golden, Antonio Serrano, Guomiao Shen, Matija Snuderl, Nick Vulpescu, Gael Westby, Paul Zappile |                |                                                                                          |                                                                                                                                                                                                          |            |          |
| Gael Westby, Paul Zappile                                                                                                                                                                                                                                                                                                                                     | EPI_ISL_418198 | hCoV-19/USA/NY-NYUMC13/2020                                                              | North America / USA / New York / Manhattan                                                                                                                                                               | 2020-03-17 |          |
| NYU Langone Health                                                                                                                                                                                                                                                                                                                                            |                | Department of Pathology and Medicine, New York University School of Medicine             |                                                                                                                                                                                                          |            |          |
| Margaret Black, John Cadley, Paolo Cotzia, John Chen, Dacia Dimartino, Xiaojun Feng, Adriana Heguy, Megan Hogan, Emily Huang, George Jour, Christian Marier, Matthew T. Maurano, Mark J. Mulligan, Peter Meyn, Jared Pinnell, Amy Rapkiewicz, Marie Samanovic-Golden, Antonio Serrano, Guomiao Shen, Matija Snuderl, Nick Vulpescu, Gael Westby, Paul Zappile |                |                                                                                          |                                                                                                                                                                                                          |            |          |
| Gael Westby, Paul Zappile                                                                                                                                                                                                                                                                                                                                     | EPI_ISL_418199 | hCoV-19/USA/NY-NYUMC14/2020                                                              | North America / USA / New York / Manhattan                                                                                                                                                               | 2020-03-17 |          |
| NYU Langone Health                                                                                                                                                                                                                                                                                                                                            |                | Department of Pathology and Medicine, New York University School of Medicine             |                                                                                                                                                                                                          |            |          |
| Margaret Black, John Cadley, Paolo Cotzia, John Chen, Dacia Dimartino, Xiaojun Feng, Adriana Heguy, Megan Hogan, Emily Huang, George Jour, Christian Marier, Matthew T. Maurano, Mark J. Mulligan, Peter Meyn, Jared Pinnell, Amy Rapkiewicz, Marie Samanovic-Golden, Antonio Serrano, Guomiao Shen, Matija Snuderl, Nick Vulpescu, Gael Westby, Paul Zappile |                |                                                                                          |                                                                                                                                                                                                          |            |          |
| Gael Westby, Paul Zappile                                                                                                                                                                                                                                                                                                                                     | EPI_ISL_418200 | hCoV-19/USA/NY-NYUMC15/2020                                                              | North America / USA / New York / Manhattan                                                                                                                                                               | 2020-03-17 |          |
| NYU Langone Health                                                                                                                                                                                                                                                                                                                                            |                | Department of Pathology and Medicine, New York University School of Medicine             |                                                                                                                                                                                                          |            |          |
| Margaret Black, John Cadley, Paolo Cotzia, John Chen, Dacia Dimartino, Xiaojun Feng, Adriana Heguy, Megan Hogan, Emily Huang, George Jour, Christian Marier, Matthew T. Maurano, Mark J. Mulligan, Peter Meyn, Jared Pinnell, Amy Rapkiewicz, Marie Samanovic-Golden, Antonio Serrano, Guomiao Shen, Matija Snuderl, Nick Vulpescu, Gael Westby, Paul Zappile |                |                                                                                          |                                                                                                                                                                                                          |            |          |
| Gael Westby, Paul Zappile                                                                                                                                                                                                                                                                                                                                     | EPI_ISL_418203 | hCoV-19/USA/NY-NYUMC18/2020                                                              | North America / USA / New York / Manhattan                                                                                                                                                               | 2020-03-17 |          |
| NYU Langone Health                                                                                                                                                                                                                                                                                                                                            |                | Department of Pathology and Medicine, New York University School of Medicine             |                                                                                                                                                                                                          |            |          |
| Margaret Black, John Cadley, Paolo Cotzia, John Chen, Dacia Dimartino, Xiaojun Feng, Adriana Heguy, Megan Hogan, Emily Huang, George Jour, Christian Marier, Matthew T. Maurano, Mark J. Mulligan, Peter Meyn, Jared Pinnell, Amy Rapkiewicz, Marie Samanovic-Golden, Antonio Serrano, Guomiao Shen, Matija Snuderl, Nick Vulpescu, Gael Westby, Paul Zappile |                |                                                                                          |                                                                                                                                                                                                          |            |          |
| Gael Westby, Paul Zappile                                                                                                                                                                                                                                                                                                                                     | EPI_ISL_418204 | hCoV-19/USA/NY-NYUMC19/2020                                                              | North America / USA / New York / Manhattan                                                                                                                                                               | 2020-03-17 |          |
| NYU Langone Health                                                                                                                                                                                                                                                                                                                                            |                | Department of Pathology and Medicine, New York University School of Medicine             |                                                                                                                                                                                                          |            |          |
| Margaret Black, John Cadley, Paolo Cotzia, John Chen, Dacia Dimartino, Xiaojun Feng, Adriana Heguy, Megan Hogan, Emily Huang, George Jour, Christian Marier, Matthew T. Maurano, Mark J. Mulligan, Peter Meyn, Jared Pinnell, Amy Rapkiewicz, Marie Samanovic-Golden, Antonio Serrano, Guomiao Shen, Matija Snuderl, Nick Vulpescu, Gael Westby, Paul Zappile |                |                                                                                          |                                                                                                                                                                                                          |            |          |
| Gael Westby, Paul Zappile                                                                                                                                                                                                                                                                                                                                     | EPI_ISL_418206 | hCoV-19/Senegal/003/2020                                                                 | Africa / Senegal / Dakar                                                                                                                                                                                 | 2020-02-28 | Institut |
| Pasteur Dakar                                                                                                                                                                                                                                                                                                                                                 |                | Institut Pasteur de Dakar                                                                | Ndongo Dia, Ousmane Faye, Amadou Alpha Sall                                                                                                                                                              |            |          |
| Gael Westby, Paul Zappile                                                                                                                                                                                                                                                                                                                                     | EPI_ISL_418207 | hCoV-19/Senegal/016/2020                                                                 | Africa / Senegal / Dakar                                                                                                                                                                                 | 2020-03-02 | Institut |
| Pasteur Dakar                                                                                                                                                                                                                                                                                                                                                 |                | Institut Pasteur de Dakar                                                                | Ndongo Dia, Ousmane Faye, Amadou Alpha Sall                                                                                                                                                              |            |          |
| Gael Westby, Paul Zappile                                                                                                                                                                                                                                                                                                                                     | EPI_ISL_418208 | hCoV-19/Senegal/020/2020                                                                 | Africa / Senegal / Dakar                                                                                                                                                                                 | 2020-03-04 | Institut |
| Pasteur Dakar                                                                                                                                                                                                                                                                                                                                                 |                | Institut Pasteur de Dakar                                                                | Ndongo Dia, Ousmane Faye, Amadou Alpha Sall                                                                                                                                                              |            |          |
| Gael Westby, Paul Zappile                                                                                                                                                                                                                                                                                                                                     | EPI_ISL_418209 | hCoV-19/Senegal/026/2020                                                                 | Africa / Senegal / Dakar                                                                                                                                                                                 | 2020-03-03 | Institut |
| Pasteur Dakar                                                                                                                                                                                                                                                                                                                                                 |                | Institut Pasteur de Dakar                                                                | Ndongo Dia, Ousmane Faye, Amadou Alpha Sall                                                                                                                                                              |            |          |
| Gael Westby, Paul Zappile                                                                                                                                                                                                                                                                                                                                     | EPI_ISL_418210 | hCoV-19/Senegal/073/2020                                                                 | Africa / Senegal / Touba                                                                                                                                                                                 | 2020-03-10 | Institut |
| Pasteur Dakar                                                                                                                                                                                                                                                                                                                                                 |                | Institut Pasteur de Dakar                                                                | Ndongo Dia, Ousmane Faye, Amadou Alpha Sall                                                                                                                                                              |            |          |
| Gael Westby, Paul Zappile                                                                                                                                                                                                                                                                                                                                     | EPI_ISL_418211 | hCoV-19/Senegal/082/2020                                                                 | Africa / Senegal / Touba                                                                                                                                                                                 | 2020-03-11 | Institut |
| Pasteur Dakar                                                                                                                                                                                                                                                                                                                                                 |                | Institut Pasteur de Dakar                                                                | Ndongo Dia, Ousmane Faye, Amadou Alpha Sall                                                                                                                                                              |            |          |
| Gael Westby, Paul Zappile                                                                                                                                                                                                                                                                                                                                     | EPI_ISL_418212 | hCoV-19/Senegal/087/2020                                                                 | Africa / Senegal / Touba                                                                                                                                                                                 | 2020-03-11 | Institut |
| Pasteur Dakar                                                                                                                                                                                                                                                                                                                                                 |                | Institut Pasteur de Dakar                                                                | Ndongo Dia, Ousmane Faye, Amadou Alpha Sall                                                                                                                                                              |            |          |
| Gael Westby, Paul Zappile                                                                                                                                                                                                                                                                                                                                     | EPI_ISL_418213 | hCoV-19/Senegal/094/2020                                                                 | Africa / Senegal / Touba                                                                                                                                                                                 | 2020-03-12 | Institut |
| Pasteur Dakar                                                                                                                                                                                                                                                                                                                                                 |                | Institut Pasteur de Dakar                                                                | Ndongo Dia, Ousmane Faye, Amadou Alpha Sall                                                                                                                                                              |            |          |
| Gael Westby, Paul Zappile                                                                                                                                                                                                                                                                                                                                     | EPI_ISL_418216 | hCoV-19/Senegal/136/2020                                                                 | Africa / Senegal / Dakar                                                                                                                                                                                 | 2020-03-13 | Institut |
| Pasteur Dakar                                                                                                                                                                                                                                                                                                                                                 |                | Institut Pasteur de Dakar                                                                | Ndongo Dia, Ousmane Faye, Amadou Alpha Sall                                                                                                                                                              |            |          |
| Gael Westby, Paul Zappile                                                                                                                                                                                                                                                                                                                                     | EPI_ISL_418217 | hCoV-19/Senegal/139/2020                                                                 | Africa / Senegal / Mbour                                                                                                                                                                                 | 2020-03-13 | Institut |
| Pasteur Dakar                                                                                                                                                                                                                                                                                                                                                 |                | Institut Pasteur de Dakar                                                                | Ndongo Dia, Ousmane Faye, Amadou Alpha Sall                                                                                                                                                              |            |          |
| Gael Westby, Paul Zappile                                                                                                                                                                                                                                                                                                                                     | EPI_ISL_418218 | hCoV-19/France/HF1465/2020                                                               | Europe / France / Hauts de France / Compiègne                                                                                                                                                            | 2020-02-21 |          |
| Centre Hospitalier Compiègne Laboratoire de Biologie                                                                                                                                                                                                                                                                                                          |                | National Reference Center for Viruses of Respiratory Infections, Institut Pasteur, Paris | Mélanie Albert, Marion Barbet, Sylvie Behillil, Méline Bizard, Angela Brisebarre, Flora Donati, Fabiana Gambaro, Etienne Simon-Lorière, Vincent Enouf, Maud Vanpeene, Sylvie van der Werf, Raulin Olivia |            |          |
| Gael Westby, Paul Zappile                                                                                                                                                                                                                                                                                                                                     | EPI_ISL_418219 | hCoV-19/France/B1623/2020                                                                | Europe / France / Bretagne / Brest                                                                                                                                                                       | 2020-02-26 | CHU -    |
| Hôpital Cavale Blanche - Labo. de Virologie                                                                                                                                                                                                                                                                                                                   |                | National Reference Center for Viruses of Respiratory                                     |                                                                                                                                                                                                          |            |          |

Infections, Institut Pasteur, Paris Mélanie Albert, Marion Barbet, Sylvie Behillil, Méline Bizard, Angela Brisebarre, Flora Donati, Fabiana Gambaro, Etienne Simon-Lorière, Vincent Enouf, Maud Vanpeene, Sylvie van der Werf, Léa Pilorge

EPI\_ISL\_418220 hCoV-19/France/HF1645/2020 Europe / France / Hauts de France / Compiègne 2020-02-28  
Centre Hospitalier Compiègne Laboratoire de Biologie National Reference Center for Viruses of Respiratory Infections, Institut Pasteur, Paris Mélanie Albert, Marion Barbet, Sylvie Behillil, Méline Bizard, Angela Brisebarre, Flora Donati, Fabiana Gambaro, Etienne Simon-Lorière, Vincent Enouf, Maud Vanpeene, Sylvie van der Werf, Raulin Olivia

EPI\_ISL\_418222 hCoV-19/France/CVL2000/2020 Europe / France / Centre-Val de Loire / Tours 2020-03-04  
CHRU Bretonneau - Serv. Bacterio-Virol. National Reference Center for Viruses of Respiratory Infections, Institut Pasteur, Paris Mélanie Albert, Marion Barbet, Sylvie Behillil, Méline Bizard, Angela Brisebarre, Flora Donati, Fabiana Gambaro, Etienne Simon-Lorière, Vincent Enouf, Maud Vanpeene, Sylvie van der Werf, Julien Marlet

EPI\_ISL\_418223 hCoV-19/France/HF2060/2020 Europe / France / Hauts de France / Compiègne 2020-03-05  
Centre Hospitalier Compiègne Laboratoire de Biologie National Reference Center for Viruses of Respiratory Infections, Institut Pasteur, Paris Mélanie Albert, Marion Barbet, Sylvie Behillil, Méline Bizard, Angela Brisebarre, Flora Donati, Fabiana Gambaro, Etienne Simon-Lorière, Vincent Enouf, Maud Vanpeene, Sylvie van der Werf, Raulin Olivia

EPI\_ISL\_418224 hCoV-19/France/HF2150/2020 Europe / France / Hauts de France / Compiègne 2020-03-08  
Centre Hospitalier Compiègne Laboratoire de Biologie National Reference Center for Viruses of Respiratory Infections, Institut Pasteur, Paris Mélanie Albert, Marion Barbet, Sylvie Behillil, Méline Bizard, Angela Brisebarre, Flora Donati, Fabiana Gambaro, Etienne Simon-Lorière, Vincent Enouf, Maud Vanpeene, Sylvie van der Werf, Raulin Olivia

EPI\_ISL\_418225 hCoV-19/France/HF2155/2020 Europe / France / Hauts de France / Compiègne 2020-03-08  
Centre Hospitalier Compiègne Laboratoire de Biologie National Reference Center for Viruses of Respiratory Infections, Institut Pasteur, Paris Mélanie Albert, Marion Barbet, Sylvie Behillil, Méline Bizard, Angela Brisebarre, Flora Donati, Fabiana Gambaro, Etienne Simon-Lorière, Vincent Enouf, Maud Vanpeene, Sylvie van der Werf, Raulin Olivia

EPI\_ISL\_418226 hCoV-19/France/HF2381/2020 Europe / France / Hauts de France / Crouy en Thelle 2020-03-09  
EHPAD - Résidences les Cèdres National Reference Center for Viruses of Respiratory Infections, Institut Pasteur, Paris Mélanie Albert, Marion Barbet, Sylvie Behillil, Méline Bizard, Angela Brisebarre, Flora Donati, Etienne Simon-Lorière, Vincent Enouf, Maud Vanpeene, Sylvie van der Werf

EPI\_ISL\_418227 hCoV-19/France/HF2393/2020 Europe / France / Hauts de France / Compiègne 2020-03-12  
Centre Hospitalier Compiègne Laboratoire de Biologie National Reference Center for Viruses of Respiratory Infections, Institut Pasteur, Paris Mélanie Albert, Marion Barbet, Sylvie Behillil, Méline Bizard, Angela Brisebarre, Flora Donati, Etienne Simon-Lorière, Vincent Enouf, Maud Vanpeene, Sylvie van der Werf, Raulin Olivia

EPI\_ISL\_418228 hCoV-19/France/HF2405/2020 Europe / France / Hauts de France / Compiègne 2020-03-12  
Centre Hospitalier Compiègne Laboratoire de Biologie National Reference Center for Viruses of Respiratory Infections, Institut Pasteur, Paris Mélanie Albert, Marion Barbet, Sylvie Behillil, Méline Bizard, Angela Brisebarre, Flora Donati, Etienne Simon-Lorière, Vincent Enouf, Maud Vanpeene, Sylvie van der Werf, Raulin Olivia

EPI\_ISL\_418229 hCoV-19/France/IDF2410/2020 Europe / France / Ile de France / Levallois-Perret 2020-03-12  
Hopital franco britannique - Laboratoire National Reference Center for Viruses of Respiratory Infections, Institut Pasteur, Paris Mélanie Albert, Marion Barbet, Sylvie Behillil, Méline Bizard, Angela Brisebarre, Flora Donati, Etienne Simon-Lorière, Vincent Enouf, Maud Vanpeene, Sylvie van der Werf, Marianne Asso Bonnet

EPI\_ISL\_418230 hCoV-19/France/IDF2420/2020 Europe / France / Ile de France / Paris 2020-03-13  
Clinique AVERAY LA BROUSTE, Med. Polyvalente National Reference Center for Viruses of Respiratory Infections, Institut Pasteur, Paris Mélanie Albert, Marion Barbet, Sylvie Behillil, Méline Bizard, Angela Brisebarre, Flora Donati, Etienne Simon-Lorière, Vincent Enouf, Maud Vanpeene, Sylvie van der Werf, Elsa Ngwem

EPI\_ISL\_418231 hCoV-19/France/HF2496/2020 Europe / France / Hauts de France / Compiègne 2020-03-15  
Centre Hospitalier Compiègne Laboratoire de Biologie National Reference Center for Viruses of Respiratory Infections, Institut Pasteur, Paris Mélanie Albert, Marion Barbet, Sylvie Behillil, Méline Bizard, Angela Brisebarre, Flora Donati, Etienne Simon-Lorière, Vincent Enouf, Maud Vanpeene, Sylvie van der Werf, Raulin Olivia

EPI\_ISL\_418232 hCoV-19/France/IDF2532/2020 Europe / France / Ile de France / Meudon la Forêt 2020-03-15  
Service des Urgences National Reference Center for Viruses of Respiratory Infections, Institut Pasteur, Paris Mélanie Albert, Marion Barbet, Sylvie Behillil, Méline Bizard, Angela Brisebarre, Flora Donati, Etienne Simon-Lorière, Vincent Enouf, Maud Vanpeene, Sylvie van der Werf, Boubkeur

EPI\_ISL\_418233 hCoV-19/France/IDF2533/2020 Europe / France / Ile de France / Meudon la Forêt 2020-03-15  
Service des Urgences National Reference Center for Viruses of Respiratory Infections, Institut Pasteur, Paris Mélanie Albert, Marion Barbet, Sylvie Behillil, Méline Bizard, Angela Brisebarre, Flora Donati, Etienne Simon-Lorière, Vincent Enouf, Maud Vanpeene, Sylvie van der Werf, Boubkeur

EPI\_ISL\_418234 hCoV-19/France/IDF2534/2020 Europe / France / Ile de France / Longjumeau 2020-03-14  
LABM GH nord Essonne National Reference Center for Viruses of Respiratory Infections, Institut Pasteur, Paris Mélanie Albert, Marion Barbet, Sylvie Behillil, Méline Bizard, Angela Brisebarre, Flora Donati, Etienne Simon-Lorière, Vincent Enouf, Maud Vanpeene, Sylvie van der Werf, Christine Lambert

EPI\_ISL\_418235 hCoV-19/France/IDF2561/2020 Europe / France / Ile de France / Vanves 2020-03-16  
Cabinet médical National Reference Center for Viruses of Respiratory Infections, Institut Pasteur, Paris



Mélanie Albert, Marion Barbet, Sylvie Behillil, Méline Bizard, Angela Brisebarre, Flora Donati, Etienne Simon-Lorière, Vincent Enouf, Maud Vanpeene, Sylvie van der Werf  
EPI\_ISL\_418236 hCoV-19/France/HF2586/2020 Europe / France / Hauts de France / Compiègne 2020-03-16  
Centre Hospitalier Compiègne Laboratoire de Biologie National Reference Center for Viruses of Respiratory Infections, Institut Pasteur, Paris Mélanie Albert, Marion Barbet, Sylvie Behillil, Méline Bizard, Angela Brisebarre, Flora Donati, Etienne Simon-Lorière, Vincent Enouf, Maud Vanpeene, Sylvie van der Werf, Raulin Olivia

EPI\_ISL\_418237 hCoV-19/France/HF2595/2020 Europe / France / Hauts de France / Compiègne 2020-03-16  
Centre Hospitalier Compiègne Laboratoire de Biologie National Reference Center for Viruses of Respiratory Infections, Institut Pasteur, Paris Mélanie Albert, Marion Barbet, Sylvie Behillil, Méline Bizard, Angela Brisebarre, Flora Donati, Etienne Simon-Lorière, Vincent Enouf, Maud Vanpeene, Sylvie van der Werf, Raulin Olivia

EPI\_ISL\_418238 hCoV-19/France/HF2597/2020 Europe / France / Hauts de France / Compiègne 2020-03-16  
Centre Hospitalier Compiègne Laboratoire de Biologie National Reference Center for Viruses of Respiratory Infections, Institut Pasteur, Paris Mélanie Albert, Marion Barbet, Sylvie Behillil, Méline Bizard, Angela Brisebarre, Flora Donati, Etienne Simon-Lorière, Vincent Enouf, Maud Vanpeene, Sylvie van der Werf, Raulin Olivia

EPI\_ISL\_418239 hCoV-19/France/HF2601/2020 Europe / France / Hauts de France / Compiègne 2020-03-16  
Centre Hospitalier Compiègne Laboratoire de Biologie National Reference Center for Viruses of Respiratory Infections, Institut Pasteur, Paris Mélanie Albert, Marion Barbet, Sylvie Behillil, Méline Bizard, Angela Brisebarre, Flora Donati, Etienne Simon-Lorière, Vincent Enouf, Maud Vanpeene, Sylvie van der Werf, Raulin Olivia

EPI\_ISL\_418240 hCoV-19/France/IDF2684/2020 Europe / France / Ile de France / Longjumeau 2020-03-16  
LABM GH nord Essonne National Reference Center for Viruses of Respiratory Infections, Institut Pasteur, Paris Mélanie Albert, Marion Barbet, Sylvie Behillil, Méline Bizard, Angela Brisebarre, Flora Donati, Etienne Simon-Lorière, Vincent Enouf, Maud Vanpeene, Sylvie van der Werf, Christine Lambert

EPI\_ISL\_418241 hCoV-19/Algeria/G0638\_2264/2020 Africa / Algeria / Boufarik 2020-03-02 NIC Viral  
Respiratory Unit - Institut Pasteur of Algeria National Reference Center for Viruses of Respiratory Infections, Institut Pasteur, Paris Mélanie Albert, Marion Barbet, Sylvie Behillil, Méline Bizard, Angela Brisebarre, Flora Donati, Etienne Simon-Lorière, Vincent Enouf, Maud Vanpeene, Sylvie van der Werf, Fawzi Derrar

EPI\_ISL\_418242 hCoV-19/Algeria/G0640\_2265/2020 Africa / Algeria / Blida 2020-03-08 NIC Viral  
Respiratory Unit - Institut Pasteur of Algeria National Reference Center for Viruses of Respiratory Infections, Institut Pasteur, Paris Mélanie Albert, Marion Barbet, Sylvie Behillil, Méline Bizard, Angela Brisebarre, Flora Donati, Etienne Simon-Lorière, Vincent Enouf, Maud Vanpeene, Sylvie van der Werf, Fawzi Derrar

EPI\_ISL\_418243 hCoV-19/Spain/Andalucia201272/2020 Europe / Spain / Andalusia 2020-02-28  
HOSPITAL UNIVERSITARIO VIRGEN DE LAS NIEVES Instituto de Salud Carlos III Iglesias-Caballero, M. Molinero Calamita, M. González-Esguevillas, M. Camarero, S. Pozo, F. Casas, I. Jiménez, P. Jiménez, M. Zaballos, A. Monzón, S. Varona, S. Juliá, M. Cuesta, I. Sanbonmatsu S.

EPI\_ISL\_418244 hCoV-19/Spain/Andalucia201373/2020 Europe / Spain / Andalusia 2020-03-02  
HOSPITAL UNIVERSITARIO VIRGEN DE LAS NIEVES Instituto de Salud Carlos III Iglesias-Caballero, M. Molinero Calamita, M. González-Esguevillas, M. Camarero, S. Pozo, F. Casas, I. Jiménez, P. Jiménez, M. Zaballos, A. Monzón, S. Varona, S. Juliá, M. Cuesta, I. Sanbonmatsu S.

EPI\_ISL\_418245 hCoV-19/Spain/CastillaLaMancha201328/2020 Europe / Spain / Castilla La Mancha 2020-03-01  
Hospital General y Universitario de Guadalajara Instituto de Salud Carlos III Iglesias-Caballero, M. Molinero Calamita, M. González-Esguevillas, M. Camarero, S. Pozo, F. Casas, I. Jiménez, P. Jiménez, M. Zaballos, A. Monzón, S. Varona, S. Juliá, M. Cuesta, I. Gonzalez-Praetorius A.

EPI\_ISL\_418246 hCoV-19/Spain/CastillaLaMancha201329/2020 Europe / Spain / Castilla-La Mancha 2020-03-01  
Hospital General y Universitario de Guadalajara Instituto de Salud Carlos III Iglesias-Caballero, M. Molinero Calamita, M. González-Esguevillas, M. Camarero, S. Pozo, F. Casas, I. Jiménez, P. Jiménez, M. Zaballos, A. Monzón, S. Varona, S. Juliá, M. Cuesta, I. Gonzalez-Praetorius A.

EPI\_ISL\_418247 hCoV-19/Spain/CastillayLeon201061/2020 Europe / Spain / Castilla y Leon 2020-02-26  
HOSPITAL GENERAL DE SEGOVIA Instituto de Salud Carlos III Iglesias-Caballero, M. Molinero Calamita, M. González-Esguevillas, M. Camarero, S. Pozo, F. Casas, I. Jiménez, P. Jiménez, M. Zaballos, A. Monzón, S. Varona, S. Juliá, M. Cuesta, I. Hernando-Real S.

EPI\_ISL\_418248 hCoV-19/Spain/CastillayLeon201323/2020 Europe / Spain / Castilla y Leon 2020-03-01  
COMPLEJO ASISTENCIAL UNIVERSITARIO DE BURGOS Instituto de Salud Carlos III Iglesias-Caballero, M. Molinero Calamita, M. González-Esguevillas, M. Camarero, S. Pozo, F. Casas, I. Jiménez, P. Jiménez, M. Zaballos, A. Monzón, S. Varona, S. Juliá, M. Cuesta, I. Megias-Lobon G.

EPI\_ISL\_418249 hCoV-19/Spain/CastillayLeon201372/2020 Europe / Spain / Castilla y Leon 2020-03-03  
COMPLEJO ASISTENCIAL UNIVERSITARIO DE BURGOS Instituto de Salud Carlos III Iglesias-Caballero, M. Molinero Calamita, M. González-Esguevillas, M. Camarero, S. Pozo, F. Casas, I. Jiménez, P. Jiménez, M. Zaballos, A. Monzón, S. Varona, S. Juliá, M. Cuesta, I. Megias-Lobon G.

EPI\_ISL\_418250 hCoV-19/Spain/Cataluna201396/2020 Europe / Spain / Catalonia 2020 HOSPITAL CLINIC  
Instituto de Salud Carlos III Iglesias-Caballero, M. Molinero Calamita, M. González-Esguevillas, M. Camarero, S. Pozo, F. Casas, I. Jiménez, P. Jiménez, M. Zaballos, A. Monzón, S. Varona, S. Juliá, M. Cuesta, I. Marcos M.A

EPI\_ISL\_418251 hCoV-19/Spain/Madrid201105/2020 Europe / Spain / Madrid 2020-02-25 HOSPITAL UNIVERSITARIO  
LA PAZ Instituto de Salud Carlos III Iglesias-Caballero, M. Molinero Calamita, M. González-Esguevillas, M.

Camarero, S. Pozo, F. Casas, I. Jiménez, P. Jiménez, M. Zaballos, A. Monzón, S. Varona, S. Juliá, M. Cuesta, I. Romero P.  
EPI\_ISL\_418252 hCoV-19/Spain/Madrid201449/2020 Europe / Spain / Madrid 2020-03-04 FUNDACION JIMENEZ DIAZ  
Instituto de Salud Carlos III Iglesias-Caballero, M. Molinero Calamita, M. González-Esguevillas, M. Camarero,  
S. Pozo, F. Casas, I. Jiménez, P. Jiménez, M. Zaballos, A. Monzón, S. Varona, S. Juliá, M. Cuesta, I. Fernández  
Roblas, R.  
EPI\_ISL\_418253 hCoV-19/Spain/PaisVasco201382/2020 Europe / Spain / Basque Country 2020-03-02  
HOSPITAL TXAGORRITXU Instituto de Salud Carlos III Iglesias-Caballero, M. Molinero Calamita, M. González-  
Esguevillas, M. Camarero, S. Pozo, F. Casas, I. Jiménez, P. Jiménez, M. Zaballos, A. Monzón, S. Varona, S.  
Juliá, M. Cuesta, I. Gomez-Gonzalez C.  
EPI\_ISL\_418255 hCoV-19/Italy/TE4925/2020 Europe / Italy / Abruzzo 2020-03-14 "Presidio  
Ospedaliero ""S. Spirito"" - PESCARA" "Istituto Zooprofilattico Sperimentale dell'Abruzzo e Molise ""G.  
Caporale"" Lorusso A, Marcacci M, Cammà C, Monaco F, Puglia I, Di Pasquale A, Rinaldi A, Mangone I, Savini  
G  
EPI\_ISL\_418256 hCoV-19/Italy/TE4880/2020 Europe / Italy / Abruzzo 2020-03-14 Ospedale "San  
Liberatore" di Atri "Istituto Zooprofilattico Sperimentale dell'Abruzzo e Molise ""G. Caporale"" Lorusso  
A, Marcacci M, Di Domenico M, Puglia I, Curini V, Ancora M, Di Pasquale A, Rinaldi A, Mangone I, Cammà C,  
Savini G.  
EPI\_ISL\_418257 hCoV-19/Italy/TE5056/2020 Europe / Italy / Abruzzo 2020-03-17 Ospedale Civile  
Giuseppe Mazzini, Teramo "Istituto Zooprofilattico Sperimentale dell'Abruzzo e Molise ""G.Caporale""  
Lorusso A, Marcacci M, Di Domenico M, Puglia I, Curini V, Ancora M, Di Pasquale A, Rinaldi A, Mangone I, Cammà  
C, Savini G.  
EPI\_ISL\_418258 hCoV-19/Italy/TE4953/2020 Europe / Italy / Abruzzo 2020-03-14 "Presidio  
ospedaliero ""Santo Spirito"" "Istituto Zooprofilattico Sperimentale dell'Abruzzo e Molise ""G. Caporale""  
Lorusso A, Marcacci M, Di Domenico M, Puglia I, Curini V, Ancora M, Di Pasquale A, Rinaldi A, Mangone I, Cammà  
C, Savini G.  
EPI\_ISL\_418259 hCoV-19/Italy/TE4959/2020 Europe / Italy / Abruzzo 2020-03-14 "Presidio  
ospedaliero ""Santo Spirito"" "Istituto Zooprofilattico Sperimentale dell'Abruzzo e Molise ""G. Caporale""  
Lorusso A, Marcacci M, Di Domenico M, Puglia I, Curini V, Ancora M, Di Pasquale A, Rinaldi A, Mangone I, Cammà  
C, Savini G.  
EPI\_ISL\_418260 hCoV-19/Italy/TE4836/2020 Europe / Italy / Abruzzo 2020-03-16 Ospedale Civile  
Giuseppe Mazzini "Istituto Zooprofilattico Sperimentale dell'Abruzzo e Molise ""G. Caporale"" Lorusso  
A, Marcacci M, Di Domenico M, Puglia I, Curini V, Ancora M, Di Pasquale A, Rinaldi A, Mangone I, Cammà C,  
Savini G.  
EPI\_ISL\_418263 hCoV-19/Greece/10/2020 Europe / Greece / Athens 2020-03-18 Laboratory of  
Microbiology, Department of Medicine, National and Kapodistrian University of Athens, Greece Laboratory of  
Biology, Department of Medicine, Democritus University of Thrace, Greece Maria Bampali, Elisavet  
Gatzidou, Nikolaos Dovrolis, Stavroula Veletza, Nikolaos Spanakis, Ioannis Karakasiliotis  
EPI\_ISL\_418264 hCoV-19/Greece/12/2020 Europe / Greece / Athens 2020-03-18 Laboratory of  
Microbiology, Department of Medicine, National and Kapodistrian University of Athens, Greece Laboratory of  
Biology, Department of Medicine, Democritus University of Thrace, Greece Maria Bampali, Elisavet  
Gatzidou, Nikolaos Dovrolis, Stavroula Veletza, Nikolaos Spanakis, Ioannis Karakasiliotis  
EPI\_ISL\_418265 hCoV-19/Greece/16/2020 Europe / Greece / Athens 2020-03-18 Laboratory of  
Microbiology, Department of Medicine, National and Kapodistrian University of Athens, Greece Laboratory of  
Biology, Department of Medicine, Democritus University of Thrace, Greece Maria Bampali, Elisavet  
Gatzidou, Nikolaos Dovrolis, Stavroula Veletza, Nikolaos Spanakis, Ioannis Karakasiliotis  
EPI\_ISL\_418267 hCoV-19/Vietnam/19-02S/2020 Asia / Vietnam / Ho Chi Minh City 2020-01-22 unknown  
Microbiology and Immunology department Nguyen,H.T., Cao,T.M., Pham,H.T.T., Vu,N.P.H., Dao,M.H., Huynh,L.T.K.,  
Nguyen,L.T., Nguyen,N.T., Nguyen,T.T.N., Nguyen,A.H., Luong,Q.C., Nguyen,T.V., Tran,K.C., Pham,Q.D., Tran,T.,  
Hoang,C.Q., Nguyen,T.T., Le,H.Q., Phung,T.M., Vo,T.N.A., Nguyen,S.N., Pham,D.T., Nguyen,T.V. and Phan,L.T.  
EPI\_ISL\_418269 hCoV-19/Vietnam/19-01S/2020 Asia / Vietnam / Ho Chi Minh City 2020-01-22 unknown  
Microbiology and Immunology department Cao,T.M., Nguyen,H.T., Pham,H.T.T., Vu,N.P.H., Dao,M.H., Huynh,L.T.K.,  
Nguyen,L.T., Nguyen,N.T., Nguyen,T.T.N., Nguyen,A.H., Luong,Q.C., Nguyen,T.V., Tran,K.C., Pham,Q.D., Tran,T.,  
Hoang,C.Q., Nguyen,T.T., Le,H.Q., Phung,T.M., Vo,T.N.A., Nguyen,S.N., Pham,D.T., Phan,L.T. and Nguyen,T.V.  
EPI\_ISL\_418270 hCoV-19/Belgium/JL-03044/2020 Europe / Belgium / Antwerp 2020-03-04 KU Leuven,  
Clinical and Epidemiological Virology KU Leuven, Clinical and Epidemiological Virology Tony Wawina,  
Joan Marti-Carreras, Bert Vanmechelen, Piet Maes  
EPI\_ISL\_418294 hCoV-19/England/SHEF-BFDFA/2020 Europe / United Kingdom / England / South Yorkshire 2020-  
03-18 Virology Department, Sheffield Teaching Hospitals NHS Foundation Trust Department of Infection,  
Immunity and Cardiovascular Disease, The Florey Institute, The Medical School, University of Sheffield Thushan  
de Silva, Matthew Parker, Adri Angyal, Rebecca Brown, Rachel Tucker, Paul Parsons, Danielle Groves, Alex  
Keeley, Dave Partridge, Matthew Wyles, Benjamin Lindsey, Mehmet Yavuz, Mohammad Raza, Cariad Evans  
EPI\_ISL\_418295 hCoV-19/England/SHEF-BFE06/2020 Europe / United Kingdom / England / South Yorkshire 2020-  
03-17 Virology Department, Sheffield Teaching Hospitals NHS Foundation Trust Department of Infection,  
Immunity and Cardiovascular Disease, The Florey Institute, The Medical School, University of Sheffield Thushan  
de Silva, Matthew Parker, Adri Angyal, Rebecca Brown, Rachel Tucker, Paul Parsons, Danielle Groves, Alex  
Keeley, Dave Partridge, Matthew Wyles, Benjamin Lindsey, Mehmet Yavuz, Mohammad Raza, Cariad Evans  
EPI\_ISL\_418548 hCoV-19/Ireland/21145/2020 Europe / Ireland / Dublin 2020-03-06 UCD National  
Virus Reference Laboratory UCD National Virus Reference Laboratory Michael Carr, Gabriel Gonzalez,  
Jonathan Dean, Suzie Coughlan, Alison Murphy, Kevin Byrne, Ken Wolfe, Jeff Connell, Brendan Loftus, Cillian F



|                                                                                                                                                                                                                                                          |                                    |                                    |            |                                                       |
|----------------------------------------------------------------------------------------------------------------------------------------------------------------------------------------------------------------------------------------------------------|------------------------------------|------------------------------------|------------|-------------------------------------------------------|
| EPI_ISL_419553                                                                                                                                                                                                                                           | hCoV-19/USA/RI_0520/2020           | North America / USA / Rhode Island | 2020-02-28 | RI State Health Laboratories                          |
| Pathogen Discovery, Respiratory Viruses Branch, Division of Viral Diseases, Centers for Disease Control and Prevention Ying Tao, Jing Zhang, Krista Queen, Anna Uehara, Clinton R. Paden, Yan Li, Haibin Wang, Jasmine Padilla, Justin Lee, Suxiang Tong |                                    |                                    |            |                                                       |
| EPI_ISL_419554                                                                                                                                                                                                                                           | hCoV-19/USA/CA_2602/2020           | North America / USA / California   | 2020-02-26 | California Department of Public Health                |
| Pathogen Discovery, Respiratory Viruses Branch, Division of Viral Diseases, Centers for Disease Control and Prevention Ying Tao, Jing Zhang, Krista Queen, Anna Uehara, Clinton R. Paden, Yan Li, Haibin Wang, Jasmine Padilla, Justin Lee, Suxiang Tong |                                    |                                    |            |                                                       |
| EPI_ISL_419555                                                                                                                                                                                                                                           | hCoV-19/USA/WA_5030/2020           | North America / USA / Washington   | 2020-02-27 | WA State Department of Health                         |
| Pathogen Discovery, Respiratory Viruses Branch, Division of Viral Diseases, Centers for Disease Control and Prevention Ying Tao, Jing Zhang, Krista Queen, Anna Uehara, Clinton R. Paden, Yan Li, Haibin Wang, Jasmine Padilla, Justin Lee, Suxiang Tong |                                    |                                    |            |                                                       |
| EPI_ISL_419556                                                                                                                                                                                                                                           | hCoV-19/USA/GA_2741/2020           | North America / USA / Georgia      | 2020-02-29 | GA Department of Public Health Laboratory             |
| Pathogen Discovery, Respiratory Viruses Branch, Division of Viral Diseases, Centers for Disease Control and Prevention Ying Tao, Jing Zhang, Krista Queen, Anna Uehara, Clinton R. Paden, Yan Li, Haibin Wang, Jasmine Padilla, Justin Lee, Suxiang Tong |                                    |                                    |            |                                                       |
| EPI_ISL_419557                                                                                                                                                                                                                                           | hCoV-19/USA/GA_2742/2020           | North America / USA / Georgia      | 2020-02-29 | GA Department of Public Health Laboratory             |
| Pathogen Discovery, Respiratory Viruses Branch, Division of Viral Diseases, Centers for Disease Control and Prevention Ying Tao, Jing Zhang, Krista Queen, Anna Uehara, Clinton R. Paden, Yan Li, Haibin Wang, Jasmine Padilla, Justin Lee, Suxiang Tong |                                    |                                    |            |                                                       |
| EPI_ISL_419558                                                                                                                                                                                                                                           | hCoV-19/USA/OR_2656/2020           | North America / USA / Oregon       | 2020-02-27 | OR State PHL-Virology/Immunology Section              |
| Pathogen Discovery, Respiratory Viruses Branch, Division of Viral Diseases, Centers for Disease Control and Prevention Ying Tao, Jing Zhang, Krista Queen, Anna Uehara, Clinton R. Paden, Yan Li, Haibin Wang, Jasmine Padilla, Justin Lee, Suxiang Tong |                                    |                                    |            |                                                       |
| EPI_ISL_419559                                                                                                                                                                                                                                           | hCoV-19/USA/FL_5125/2020           | North America / USA / Florida      | 2020-02-28 | FL Bureau of Public Health Laboratories-Tampa         |
| Pathogen Discovery, Respiratory Viruses Branch, Division of Viral Diseases, Centers for Disease Control and Prevention Anna Uehara, Ying Tao, Jing Zhang, Krista Queen, Clinton R. Paden, Yan Li, Haibin Wang, Jasmine Padilla, Justin Lee, Suxiang Tong |                                    |                                    |            |                                                       |
| EPI_ISL_419560                                                                                                                                                                                                                                           | hCoV-19/USA/FL_5091/2020           | North America / USA / Florida      | 2020-02-28 | FL Bureau of Public Health Laboratories-Tampa         |
| Pathogen Discovery, Respiratory Viruses Branch, Division of Viral Diseases, Centers for Disease Control and Prevention Anna Uehara, Ying Tao, Jing Zhang, Krista Queen, Clinton R. Paden, Yan Li, Haibin Wang, Jasmine Padilla, Justin Lee, Suxiang Tong |                                    |                                    |            |                                                       |
| EPI_ISL_419562                                                                                                                                                                                                                                           | hCoV-19/Luxembourg/LNS0000001/2020 | Europe / Luxembourg                | 2020-02-29 | Laboratoire National de Santé, Microbiology, Virology |
| Laboratoire National de Santé, Microbiology, Epidemiology and Microbial Genomics Anke Wienecke-Baldacchino, Ardashel Latsuzbaia, Jessica Tapp, Catherine Ragimbeau, Guillaume Fournier, Tamir Abdelrahman, Trung Nguyen Nguyen, Joel Mossong             |                                    |                                    |            |                                                       |
| EPI_ISL_419563                                                                                                                                                                                                                                           | hCoV-19/Luxembourg/LNS0156959/2020 | Europe / Luxembourg                | 2020-03-12 | Laboratoire National de Santé, Microbiology, Virology |
| Laboratoire National de Santé, Microbiology, Epidemiology and Microbial Genomics Anke Wienecke-Baldacchino, Ardashel Latsuzbaia, Jessica Tapp, Catherine Ragimbeau, Guillaume Fournier, Tamir Abdelrahman, Trung Nguyen Nguyen, Joel Mossong             |                                    |                                    |            |                                                       |
| EPI_ISL_419564                                                                                                                                                                                                                                           | hCoV-19/Luxembourg/LNS0366116/2020 | Europe / Luxembourg                | 2020-03-15 | Laboratoire National de Santé, Microbiology, Virology |
| Laboratoire National de Santé, Microbiology, Epidemiology and Microbial Genomics Anke Wienecke-Baldacchino, Ardashel Latsuzbaia, Jessica Tapp, Catherine Ragimbeau, Guillaume Fournier, Tamir Abdelrahman, Trung Nguyen Nguyen, Joel Mossong             |                                    |                                    |            |                                                       |
| EPI_ISL_419566                                                                                                                                                                                                                                           | hCoV-19/Luxembourg/LNS0641910/2020 | Europe / Luxembourg                | 2020-03-05 | Laboratoire National de Santé, Microbiology, Virology |
| Laboratoire National de Santé, Microbiology, Epidemiology and Microbial Genomics Anke Wienecke-Baldacchino, Ardashel Latsuzbaia, Jessica Tapp, Catherine Ragimbeau, Guillaume Fournier, Tamir Abdelrahman, Trung Nguyen Nguyen, Joel Mossong             |                                    |                                    |            |                                                       |
| EPI_ISL_419568                                                                                                                                                                                                                                           | hCoV-19/Luxembourg/LNS0756270/2020 | Europe / Luxembourg                | 2020-03-14 | Laboratoire National de Santé, Microbiology, Virology |
| Laboratoire National de Santé, Microbiology, Epidemiology and Microbial Genomics Anke Wienecke-Baldacchino, Ardashel Latsuzbaia, Jessica Tapp, Catherine Ragimbeau, Guillaume Fournier, Tamir Abdelrahman, Trung Nguyen Nguyen, Joel Mossong             |                                    |                                    |            |                                                       |
| EPI_ISL_419569                                                                                                                                                                                                                                           | hCoV-19/Luxembourg/LNS0945359/2020 | Europe / Luxembourg                | 2020-03-07 | Laboratoire National de Santé, Microbiology, Virology |
| Laboratoire National de Santé, Microbiology, Epidemiology and Microbial Genomics Anke Wienecke-Baldacchino, Ardashel Latsuzbaia, Jessica Tapp, Catherine Ragimbeau, Guillaume Fournier, Tamir Abdelrahman, Trung Nguyen Nguyen, Joel Mossong             |                                    |                                    |            |                                                       |
| EPI_ISL_419570                                                                                                                                                                                                                                           | hCoV-19/Luxembourg/LNS1234709/2020 | Europe / Luxembourg                | 2020-03-12 | Laboratoire National de Santé, Microbiology, Virology |
| Laboratoire National de Santé, Microbiology, Epidemiology and Microbial Genomics Anke Wienecke-Baldacchino, Ardashel Latsuzbaia, Jessica Tapp, Catherine Ragimbeau, Guillaume Fournier, Tamir Abdelrahman, Trung Nguyen Nguyen, Joel Mossong             |                                    |                                    |            |                                                       |
| EPI_ISL_419573                                                                                                                                                                                                                                           | hCoV-19/Luxembourg/LNS1874423/2020 | Europe / Luxembourg                | 2020-03-11 | Laboratoire National de Santé, Microbiology, Virology |
| Laboratoire National de Santé, Microbiology, Epidemiology and Microbial Genomics Anke Wienecke-Baldacchino, Ardashel Latsuzbaia, Jessica Tapp, Catherine Ragimbeau, Guillaume Fournier, Tamir Abdelrahman, Trung Nguyen Nguyen, Joel Mossong             |                                    |                                    |            |                                                       |
| EPI_ISL_419578                                                                                                                                                                                                                                           | hCoV-19/Luxembourg/LNS2614631/2020 | Europe / Luxembourg                | 2020-03-08 | Laboratoire National de Santé, Microbiology, Virology |
| Laboratoire National de Santé, Microbiology, Epidemiology and Microbial Genomics Anke Wienecke-Baldacchino, Ardashel Latsuzbaia, Jessica Tapp, Catherine Ragimbeau, Guillaume Fournier, Tamir Abdelrahman, Trung Nguyen Nguyen, Joel Mossong             |                                    |                                    |            |                                                       |
| EPI_ISL_419579                                                                                                                                                                                                                                           | hCoV-19/Luxembourg/LNS2886370/2020 | Europe / Luxembourg                | 2020-03-14 | Laboratoire National de Santé, Microbiology, Virology |
| Laboratoire National de Santé, Microbiology, Epidemiology and Microbial Genomics Anke Wienecke-Baldacchino, Ardashel Latsuzbaia, Jessica Tapp, Catherine Ragimbeau, Guillaume Fournier, Tamir Abdelrahman, Trung Nguyen Nguyen, Joel Mossong             |                                    |                                    |            |                                                       |



|                |                                    |                                |            |                                                                                                                                    |
|----------------|------------------------------------|--------------------------------|------------|------------------------------------------------------------------------------------------------------------------------------------|
| EPI_ISL_419598 | hCoV-19/Luxembourg/LNS8188502/2020 | Europe / Luxembourg            | 2020-03-14 | Laboratoire National de Santé, Microbiology, Virology and Microbial Genomics                                                       |
| EPI_ISL_419599 | hCoV-19/Luxembourg/LNS8639502/2020 | Europe / Luxembourg            | 2020-03-16 | Laboratoire National de Santé, Microbiology, Virology and Microbial Genomics                                                       |
| EPI_ISL_419800 | hCoV-19/Australia/VIC89/2020       | Oceania / Australia / Victoria | 2020-03-15 | Victorian Infectious Diseases Reference Laboratory (VIDRL)                                                                         |
| EPI_ISL_419801 | hCoV-19/Australia/VIC90/2020       | Oceania / Australia / Victoria | 2020-03-15 | Victorian Infectious Diseases Reference Laboratory and Microbiological Diagnostic Unit Public Health Laboratory, Doherty Institute |
| EPI_ISL_419802 | hCoV-19/Australia/VIC45/2020       | Oceania / Australia / Victoria | 2020-03-11 | Victorian Infectious Diseases Reference Laboratory and Microbiological Diagnostic Unit Public Health Laboratory, Doherty Institute |
| EPI_ISL_419803 | hCoV-19/Australia/VIC84/2020       | Oceania / Australia / Victoria | 2020-03-14 | Victorian Infectious Diseases Reference Laboratory and Microbiological Diagnostic Unit Public Health Laboratory, Doherty Institute |
| EPI_ISL_419804 | hCoV-19/Australia/VIC91/2020       | Oceania / Australia / Victoria | 2020-03-15 | Victorian Infectious Diseases Reference Laboratory and Microbiological Diagnostic Unit Public Health Laboratory, Doherty Institute |
| EPI_ISL_419805 | hCoV-19/Australia/VIC94/2020       | Oceania / Australia / Victoria | 2020-03-16 | Victorian Infectious Diseases Reference Laboratory and Microbiological Diagnostic Unit Public Health Laboratory, Doherty Institute |
| EPI_ISL_419806 | hCoV-19/Australia/VIC95/2020       | Oceania / Australia / Victoria | 2020-03-16 | Victorian Infectious Diseases Reference Laboratory and Microbiological Diagnostic Unit Public Health Laboratory, Doherty Institute |
| EPI_ISL_419807 | hCoV-19/Australia/VIC96/2020       | Oceania / Australia / Victoria | 2020-03-16 | Victorian Infectious Diseases Reference Laboratory and Microbiological Diagnostic Unit Public Health Laboratory, Doherty Institute |
| EPI_ISL_419808 | hCoV-19/Australia/VIC97/2020       | Oceania / Australia / Victoria | 2020-03-16 | Victorian Infectious Diseases Reference Laboratory and Microbiological Diagnostic Unit Public Health Laboratory, Doherty Institute |
| EPI_ISL_419809 | hCoV-19/Australia/VIC92/2020       | Oceania / Australia / Victoria | 2020-03-15 | Victorian Infectious Diseases Reference Laboratory and Microbiological Diagnostic Unit Public Health Laboratory, Doherty Institute |
| EPI_ISL_419810 | hCoV-19/Australia/VIC98/2020       | Oceania / Australia / Victoria | 2020-03-16 | Victorian Infectious Diseases Reference Laboratory and Microbiological Diagnostic Unit Public Health Laboratory, Doherty Institute |
| EPI_ISL_419811 | hCoV-19/Australia/VIC99/2020       | Oceania / Australia / Victoria | 2020-03-16 | Victorian Infectious Diseases Reference Laboratory and Microbiological Diagnostic Unit Public Health Laboratory, Doherty Institute |
| EPI_ISL_419812 | hCoV-19/Australia/VIC100/2020      | Oceania / Australia / Victoria | 2020-03-16 | Victorian Infectious Diseases Reference Laboratory and Microbiological Diagnostic Unit Public Health Laboratory, Doherty Institute |
| EPI_ISL_419813 | hCoV-19/Australia/VIC101/2020      | Oceania / Australia / Victoria | 2020-03-16 | Victorian Infectious Diseases Reference Laboratory and Microbiological Diagnostic Unit Public Health Laboratory, Doherty Institute |
| EPI_ISL_419814 | hCoV-19/Australia/VIC103/2020      | Oceania / Australia / Victoria | 2020-03-17 | Victorian Infectious Diseases Reference Laboratory and Microbiological Diagnostic Unit Public Health Laboratory, Doherty Institute |
| EPI_ISL_419816 | hCoV-19/Australia/VIC46/2020       | Oceania / Australia / Victoria | 2020-03-11 | Victorian Infectious Diseases Reference Laboratory and                                                                             |









|                                                                                                                                                                                                                                                                                                                           |                                                                                                                                                                           |
|---------------------------------------------------------------------------------------------------------------------------------------------------------------------------------------------------------------------------------------------------------------------------------------------------------------------------|---------------------------------------------------------------------------------------------------------------------------------------------------------------------------|
| Infectious Diseases Reference Laboratory (VIDRL)<br>Microbiological Diagnostic Unit Public Health Laboratory, Doherty Institute                                                                                                                                                                                           | Victorian Infectious Diseases Reference Laboratory and<br>Caly L., Seemann T., Sait, M.,<br>Schultz M., Druce J., Sherry, N.                                              |
| EPI_ISL_419893 hCoV-19/Australia/VIC197/2020<br>Infectious Diseases Reference Laboratory (VIDRL)<br>Microbiological Diagnostic Unit Public Health Laboratory, Doherty Institute                                                                                                                                           | Oceania / Australia / Victoria 2020-03-19<br>Victorian Infectious Diseases Reference Laboratory and<br>Caly L., Seemann T., Sait, M.,<br>Schultz M., Druce J., Sherry, N. |
| EPI_ISL_419894 hCoV-19/Australia/VIC198/2020<br>Infectious Diseases Reference Laboratory (VIDRL)<br>Microbiological Diagnostic Unit Public Health Laboratory, Doherty Institute                                                                                                                                           | Oceania / Australia / Victoria 2020-03-19<br>Victorian Infectious Diseases Reference Laboratory and<br>Caly L., Seemann T., Sait, M.,<br>Schultz M., Druce J., Sherry, N. |
| EPI_ISL_419895 hCoV-19/Australia/VIC199/2020<br>Infectious Diseases Reference Laboratory (VIDRL)<br>Microbiological Diagnostic Unit Public Health Laboratory, Doherty Institute                                                                                                                                           | Oceania / Australia / Victoria 2020-03-19<br>Victorian Infectious Diseases Reference Laboratory and<br>Caly L., Seemann T., Sait, M.,<br>Schultz M., Druce J., Sherry, N. |
| EPI_ISL_419896 hCoV-19/Australia/VIC201/2020<br>Infectious Diseases Reference Laboratory (VIDRL)<br>Microbiological Diagnostic Unit Public Health Laboratory, Doherty Institute                                                                                                                                           | Oceania / Australia / Victoria 2020-03-19<br>Victorian Infectious Diseases Reference Laboratory and<br>Caly L., Seemann T., Sait, M.,<br>Schultz M., Druce J., Sherry, N. |
| EPI_ISL_419897 hCoV-19/Australia/VIC202/2020<br>Infectious Diseases Reference Laboratory (VIDRL)<br>Microbiological Diagnostic Unit Public Health Laboratory, Doherty Institute                                                                                                                                           | Oceania / Australia / Victoria 2020-03-19<br>Victorian Infectious Diseases Reference Laboratory and<br>Caly L., Seemann T., Sait, M.,<br>Schultz M., Druce J., Sherry, N. |
| EPI_ISL_419898 hCoV-19/Australia/VIC203/2020<br>Infectious Diseases Reference Laboratory (VIDRL)<br>Microbiological Diagnostic Unit Public Health Laboratory, Doherty Institute                                                                                                                                           | Oceania / Australia / Victoria 2020-03-19<br>Victorian Infectious Diseases Reference Laboratory and<br>Caly L., Seemann T., Sait, M.,<br>Schultz M., Druce J., Sherry, N. |
| EPI_ISL_419899 hCoV-19/Australia/VIC204/2020<br>Infectious Diseases Reference Laboratory (VIDRL)<br>Microbiological Diagnostic Unit Public Health Laboratory, Doherty Institute                                                                                                                                           | Oceania / Australia / Victoria 2020-03-19<br>Victorian Infectious Diseases Reference Laboratory and<br>Caly L., Seemann T., Sait, M.,<br>Schultz M., Druce J., Sherry, N. |
| EPI_ISL_420508 hCoV-19/England/20132072802/2020<br>Respiratory Virus Unit, Microbiology Services Colindale, Public Health England<br>Microbiology Services Colindale, Public Health England<br>Akinbami, Tiina Talts, Leena Bhaw, Richard Myers, Steven Platt, Kirstin Edwards, Jonathan Hubb, Joanna Ellis, Maria Zambon | Europe / United Kingdom / England 2020-03-23<br>Respiratory Virus Unit,<br>Monica Galiano, Shahjahan Miah, Angie Lackenby, Omolola                                        |
| EPI_ISL_420520 hCoV-19/England/20136015502/2020<br>Respiratory Virus Unit, Microbiology Services Colindale, Public Health England<br>Microbiology Services Colindale, Public Health England<br>Akinbami, Tiina Talts, Leena Bhaw, Richard Myers, Steven Platt, Kirstin Edwards, Jonathan Hubb, Joanna Ellis, Maria Zambon | Europe / United Kingdom / England 2020-03-24<br>Respiratory Virus Unit,<br>Monica Galiano, Shahjahan Miah, Angie Lackenby, Omolola                                        |
| EPI_ISL_420521 hCoV-19/England/20138012802/2020<br>Respiratory Virus Unit, Microbiology Services Colindale, Public Health England<br>Microbiology Services Colindale, Public Health England<br>Akinbami, Tiina Talts, Leena Bhaw, Richard Myers, Steven Platt, Kirstin Edwards, Jonathan Hubb, Joanna Ellis, Maria Zambon | Europe / United Kingdom / England 2020-03-25<br>Respiratory Virus Unit,<br>Monica Galiano, Shahjahan Miah, Angie Lackenby, Omolola                                        |
| EPI_ISL_420522 hCoV-19/England/20138014402/2020<br>Respiratory Virus Unit, Microbiology Services Colindale, Public Health England<br>Microbiology Services Colindale, Public Health England<br>Akinbami, Tiina Talts, Leena Bhaw, Richard Myers, Steven Platt, Kirstin Edwards, Jonathan Hubb, Joanna Ellis, Maria Zambon | Europe / United Kingdom / England 2020-03-25<br>Respiratory Virus Unit,<br>Monica Galiano, Shahjahan Miah, Angie Lackenby, Omolola                                        |
| EPI_ISL_420524 hCoV-19/England/20139018302/2020<br>Respiratory Virus Unit, Microbiology Services Colindale, Public Health England<br>Microbiology Services Colindale, Public Health England<br>Akinbami, Tiina Talts, Leena Bhaw, Richard Myers, Steven Platt, Kirstin Edwards, Jonathan Hubb, Joanna Ellis, Maria Zambon | Europe / United Kingdom / England 2020-03-26<br>Respiratory Virus Unit,<br>Monica Galiano, Shahjahan Miah, Angie Lackenby, Omolola                                        |
| EPI_ISL_420531 hCoV-19/Australia/WA01/2020<br>Microbiology, PathWest QEII Medical Centre<br>Chisha Sikazwe, Jurissa Lang, Avram Levy, David Speers and David Smith                                                                                                                                                        | Oceania / Australia 2020-03-14<br>Department of<br>Department of Microbiology, PathWest QEII Medical Centre                                                               |
| EPI_ISL_420532 hCoV-19/Australia/WA02/2020<br>Department of Microbiology, PathWest QEII Medical Centre<br>Medical Centre<br>Chisha Sikazwe, Jurissa Lang, Avram Levy, David Speers and David Smith                                                                                                                        | Oceania / Australia / Western Australia / Perth 2020-03-13<br>Department of Microbiology, PathWest QEII<br>Department of Microbiology, PathWest QEII                      |
| EPI_ISL_420533 hCoV-19/Australia/WA03/2020<br>Department of Microbiology, PathWest QEII Medical Centre<br>Medical Centre<br>Chisha Sikazwe, Jurissa Lang, Avram Levy, David Speers and David Smith                                                                                                                        | Oceania / Australia / Western Australia / Perth 2020-03-14<br>Department of Microbiology, PathWest QEII<br>Department of Microbiology, PathWest QEII                      |
| EPI_ISL_420534 hCoV-19/Australia/WA06/2020<br>Department of Microbiology, PathWest QEII Medical Centre<br>Medical Centre<br>Chisha Sikazwe, Jurissa Lang, Avram Levy, David Speers and David Smith                                                                                                                        | Oceania / Australia / Western Australia / Perth 2020-03-04<br>Department of Microbiology, PathWest QEII<br>Department of Microbiology, PathWest QEII                      |
| EPI_ISL_420536 hCoV-19/Australia/WA04/2020<br>Department of Microbiology, PathWest QEII Medical Centre                                                                                                                                                                                                                    | Oceania / Australia / Western Australia / Perth 2020-03-15<br>Department of Microbiology, PathWest QEII                                                                   |

Medical Centre Chisha Sikazwe, Jurissa Lang, Avram Levy, David Speers and David Smith  
 EPI\_ISL\_420537 hCoV-19/Australia/WA07/2020 Oceania / Australia / Western Australia / Perth 2020-03-13  
 Department of Microbiology, PathWest QEII Medical Centre Department of Microbiology, PathWest QEII  
 Medical Centre Chisha Sikazwe, Jurissa Lang, Avram Levy, David Speers and David Smith  
 EPI\_ISL\_420538 hCoV-19/Australia/WA09/2020 Oceania / Australia / Western Australia / Perth 2020-03-14  
 Department of Microbiology, PathWest QEII Medical Centre Department of Microbiology, PathWest QEII  
 Medical Centre Chisha Sikazwe, Jurissa Lang, Avram Levy, David Speers and David Smith  
 EPI\_ISL\_420539 hCoV-19/Australia/WA10/2020 Oceania / Australia / Western Australia / Perth 2020-03-14  
 Department of Microbiology, PathWest QEII Medical Centre Department of Microbiology, PathWest QEII  
 Medical Centre Chisha Sikazwe, Jurissa Lang, Avram Levy, David Speers and David Smith  
 EPI\_ISL\_420540 hCoV-19/Estonia/ChVir2148/2020 Europe / Estonia 2020-03 SYNLAB Eesti OÜ Charité  
 Universitätsmedizin Berlin, Institute of Virology Victor M Corman, Jörn Beheim-Schwarzbach, Barbara  
 Mühlemann, Talitha Veith, Julia Schneider, Paul Naaber, Terry Jones, Christian Drosten  
 EPI\_ISL\_420541 hCoV-19/Slovenia/808/2020 Europe / Slovenia 2020-03-05 Institute of  
 Microbiology and Immunology, Faculty of Medicine, University of Ljubljana Institute of Microbiology and  
 Immunology, Faculty of Medicine, University of Ljubljana Tomaž Mark Zorec, Samo Zakotnik, Lucijan  
 Skubic, Miša Korva, Tatjana Avšič - Županc, Mario Poljak  
 EPI\_ISL\_420543 hCoV-19/India/763/2020 Asia / India 2020-03-03 National Influenza Center, Indian  
 Council of Medical Research - National Institute of Virology Indian Council of Medical Research-National  
 Institute of Virology, Microbial Containment Complex Pragma D. Yadav. Savita Patil, Varsha Potdar, Prasad  
 Sarkale, Dimpal A. Nyayanit, Gajanan Sapkal, Anita M. Shete, Atanu Basu, Lalit Dar, M Choudhary, Amita Jain,  
 Bharati Malhotra, Pranita Gawande, Sarah Cherian, Priya Abraham  
 EPI\_ISL\_420544 hCoV-19/India/2020763/2020 Asia / India 2020 Indian Council of Medical Research-  
 National Institute of Virology, Microbial Containment Complex Indian Council of Medical Research-National  
 Institute of Virology, Microbial Containment Complex Pragma D. Yadav. Savita Patil, Varsha Potdar, Prasad  
 Sarkale, Dimpal A. Nyayanit, Gajanan Sapkal, Anita M. Shete, Atanu Basu, Lalit Dar, M Choudhary, Amita Jain,  
 Bharati Malhotra, Pranita Gawande, Sarah Cherian, Priya Abraham  
 EPI\_ISL\_420545 hCoV-19/India/770/2020 Asia / India 2020-03 National Influenza Center, Indian  
 Council of Medical Research - National Institute of Virology Indian Council of Medical Research-National  
 Institute of Virology, Microbial Containment Complex Pragma D. Yadav. Savita Patil, Varsha Potdar, Prasad  
 Sarkale, Dimpal A. Nyayanit, Gajanan Sapkal, Anita M. Shete, Atanu Basu, Lalit Dar, M Choudhary, Amita Jain,  
 Bharati Malhotra, Pranita Gawande, Sarah Cherian, Priya Abraham  
 EPI\_ISL\_420546 hCoV-19/India/2020770/2020 Asia / India 2020 Indian Council of Medical Research-  
 National Institute of Virology, Microbial Containment Complex Indian Council of Medical Research-National  
 Institute of Virology, Microbial Containment Complex Pragma D. Yadav. Savita Patil, Varsha Potdar, Prasad  
 Sarkale, Dimpal A. Nyayanit, Gajanan Sapkal, Anita M. Shete, Atanu Basu, Lalit Dar, M Choudhary, Amita Jain,  
 Bharati Malhotra, Pranita Gawande, Sarah Cherian, Priya Abraham  
 EPI\_ISL\_420547 hCoV-19/India/772/2020 Asia / India 2020-03-03 National Influenza Center, Indian  
 Council of Medical Research - National Institute of Virology Indian Council of Medical Research-National  
 Institute of Virology, Microbial Containment Complex Pragma D. Yadav. Savita Patil, Varsha Potdar, Prasad  
 Sarkale, Dimpal A. Nyayanit, Gajanan Sapkal, Anita M. Shete, Atanu Basu, Lalit Dar, M Choudhary, Amita Jain,  
 Bharati Malhotra, Pranita Gawande, Sarah Cherian, Priya Abraham  
 EPI\_ISL\_420548 hCoV-19/India/2020772/2020 Asia / India 2020 Indian Council of Medical Research-  
 National Institute of Virology, Microbial Containment Complex Indian Council of Medical Research-National  
 Institute of Virology, Microbial Containment Complex Pragma D. Yadav. Savita Patil, Varsha Potdar, Prasad  
 Sarkale, Dimpal A. Nyayanit, Gajanan Sapkal, Anita M. Shete, Atanu Basu, Lalit Dar, M Choudhary, Amita Jain,  
 Bharati Malhotra, Pranita Gawande, Sarah Cherian, Priya Abraham  
 EPI\_ISL\_420549 hCoV-19/India/773/2020 Asia / India 2020-03-03 National Influenza Center, Indian  
 Council of Medical Research - National Institute of Virology Indian Council of Medical Research-National  
 Institute of Virology, Microbial Containment Complex Pragma D. Yadav. Savita Patil, Varsha Potdar, Prasad  
 Sarkale, Dimpal A. Nyayanit, Gajanan Sapkal, Anita M. Shete, Atanu Basu, Lalit Dar, M Choudhary, Amita Jain,  
 Bharati Malhotra, Pranita Gawande, Sarah Cherian, Priya Abraham  
 EPI\_ISL\_420550 hCoV-19/India/2020773/2020 Asia / India 2020 Indian Council of Medical Research-  
 National Institute of Virology, Microbial Containment Complex Indian Council of Medical Research-National  
 Institute of Virology, Microbial Containment Complex Pragma D. Yadav. Savita Patil, Varsha Potdar, Prasad  
 Sarkale, Dimpal A. Nyayanit, Gajanan Sapkal, Anita M. Shete, Atanu Basu, Lalit Dar, M Choudhary, Amita Jain,  
 Bharati Malhotra, Pranita Gawande, Sarah Cherian, Priya Abraham  
 EPI\_ISL\_420551 hCoV-19/India/777/2020 Asia / India 2020-03-03 National Influenza Center, Indian  
 Council of Medical Research - National Institute of Virology Indian Council of Medical Research-National  
 Institute of Virology, Microbial Containment Complex Pragma D. Yadav. Savita Patil, Varsha Potdar, Prasad  
 Sarkale, Dimpal A. Nyayanit, Gajanan Sapkal, Anita M. Shete, Atanu Basu, Lalit Dar, M Choudhary, Amita Jain,  
 Bharati Malhotra, Pranita Gawande, Sarah Cherian, Priya Abraham  
 EPI\_ISL\_420552 hCoV-19/India/2020777/2020 Asia / India 2020 Indian Council of Medical Research-  
 National Institute of Virology, Microbial Containment Complex Indian Council of Medical Research-National  
 Institute of Virology, Microbial Containment Complex Pragma D. Yadav. Savita Patil, Varsha Potdar, Prasad  
 Sarkale, Dimpal A. Nyayanit, Gajanan Sapkal, Anita M. Shete, Atanu Basu, Lalit Dar, M Choudhary, Amita Jain,  
 Bharati Malhotra, Pranita Gawande, Sarah Cherian, Priya Abraham  
 EPI\_ISL\_420553 hCoV-19/India/781/2020 Asia / India 2020-03-03 National Influenza Center, Indian  
 Council of Medical Research - National Institute of Virology Indian Council of Medical Research-National  
 Institute of Virology, Microbial Containment Complex Pragma D. Yadav. Savita Patil, Varsha Potdar, Prasad

Sarkale, Dimpal A. Nyayanit, Gajanan Sapkal, Anita M. Shete, Atanu Basu, Lalit Dar, M Choudhary, Amita Jain, Bharati Malhotra, Pranita Gawande, Sarah Cherian, Priya Abraham  
EPI\_ISL\_420554 hCoV-19/India/2020781/2020 Asia / India 2020 Indian Council of Medical Research-National Institute of Virology, Microbial Containment Complex Indian Council of Medical Research-National Institute of Virology, Microbial Containment Complex Pragma D. Yadav. Savita Patil, Varsha Potdar, Prasad Sarkale, Dimpal A. Nyayanit, Gajanan Sapkal, Anita M. Shete, Atanu Basu, Lalit Dar, M Choudhary, Amita Jain, Bharati Malhotra, Pranita Gawande, Sarah Cherian, Priya Abraham  
EPI\_ISL\_420555 hCoV-19/India/c32/2020 Asia / India 2020-03-03 National Influenza Center, Indian Council of Medical Research - National Institute of Virology Indian Council of Medical Research-National Institute of Virology, Microbial Containment Complex Pragma D. Yadav. Savita Patil, Varsha Potdar, Prasad Sarkale, Dimpal A. Nyayanit, Gajanan Sapkal, Anita M. Shete, Atanu Basu, Lalit Dar, M Choudhary, Amita Jain, Bharati Malhotra, Pranita Gawande, Sarah Cherian, Priya Abraham  
EPI\_ISL\_420556 hCoV-19/India/2020c32/2020 Asia / India 2020 Indian Council of Medical Research-National Institute of Virology, Microbial Containment Complex Indian Council of Medical Research-National Institute of Virology, Microbial Containment Complex Pragma D. Yadav. Savita Patil, Varsha Potdar, Prasad Sarkale, Dimpal A. Nyayanit, Gajanan Sapkal, Anita M. Shete, Atanu Basu, Lalit Dar, M Choudhary, Amita Jain, Bharati Malhotra, Pranita Gawande, Sarah Cherian, Priya Abraham  
EPI\_ISL\_420563 hCoV-19/Italy/TE5166/2020 Europe / Italy / Teramo 2020-03-18 Ospedale Civile Giuseppe Mazzini "Istituto Zooprofilattico Sperimentale dell'Abruzzo e Molise ""G. Caporale"" Lorusso A, Marcacci M, Di Domenico M, Ancora M, Curini V, Mangone I, Rinaldi A, Di Pasquale A, Cammà C, Puglia I, Savini G  
EPI\_ISL\_420564 hCoV-19/Italy/TE5472/2020 Europe / Italy / Castel di Sangro 2020-03-19 Ospedale Civile Castel Di Sangro Istituto Zooprofilattico Sperimentale dell'Abruzzo e Molise "G. Caporale" Lorusso A, Marcacci M, Di Domenico M, Ancora M, Curini V, Mangone I, Rinaldi A, Di Pasquale A, Cammà C, Puglia I, Savini G  
EPI\_ISL\_420565 hCoV-19/Italy/TE5476/2020 Europe / Italy / Abruzzo / Teramo 2020-03-19 Ospedale Civile Giuseppe Mazzini Istituto Zooprofilattico Sperimentale dell'Abruzzo e Molise "G. Caporale" Lorusso A, Marcacci M, Di Domenico M, Ancora M, Curini V, Mangone I, Rinaldi A, Di Pasquale A, Cammà C, Puglia I, Savini G  
EPI\_ISL\_420566 hCoV-19/Italy/TE5512/2020 Europe / Italy / Abruzzo 2020-03-19 Ospedale Regionale San Salvatore Istituto Zooprofilattico Sperimentale dell'Abruzzo e Molise "G. Caporale" Lorusso A, Marcacci M, Di Domenico M, Ancora M, Curini V, Mangone I, Rinaldi A, Di Pasquale A, Cammà C, Puglia I, Savini G  
EPI\_ISL\_420567 hCoV-19/Italy/TE5780/2020 Europe / Italy / Abruzzo / L'Aquila 2020-03-21 Ospedale Regionale San Salvatore Istituto Zooprofilattico Sperimentale dell'Abruzzo e Molise "G. Caporale" Lorusso A, Marcacci M, Di Domenico M, Ancora M, Curini V, Mangone I, Rinaldi A, Di Pasquale A, Cammà C, Puglia I, Savini G  
EPI\_ISL\_420568 hCoV-19/Italy/6193/2020 Europe / Italy / Abruzzo 2020-03-23 Ospedale Civile Giuseppe Mazzini Istituto Zooprofilattico Sperimentale dell'Abruzzo e Molise "G. Caporale" Lorusso A, Marcacci M, Di Domenico M, Ancora M, Curini V, Mangone I, Rinaldi A, Di Pasquale A, Cammà C, Puglia I, Savini G  
EPI\_ISL\_420569 hCoV-19/Italy/TE6195/2020 Europe / Italy / Abruzzo 2020-03-23 Ospedale Civile Giuseppe Mazzini Istituto Zooprofilattico Sperimentale dell'Abruzzo e Molise "G. Caporale" Lorusso A, Marcacci M, Di Domenico M, Ancora M, Curini V, Mangone I, Rinaldi A, Di Pasquale A, Cammà C, Puglia I, Savini G  
EPI\_ISL\_420570 hCoV-19/USA/NY-NYUMC55/2020 North America / USA / New York / Nassau County 2020-03-17 NYU Langone Health Departments of Pathology and Medicine, New York University School of Medicine Maria Aguerro-Rosenfeld, Brendan Belovarac, Margaret Black, Ludovic Boytard, John Cadley, Paolo Cotzia, John Chen, Dacia Dimartino, Xiaojun Feng, Tatyana Gindin, Adriana Heguy, Megan Hogan, Emily Huang, George Jour, Andrew Lytle, Christian Marier, Matthew T. Maurano, Mark J. Mulligan, Peter Meyn, Iman Osman, Jared Pinnell, Sitharam Ramaswami, Amy Rapkiewicz, Marie Samanovic-Golden, Antonio Serrano, Guomiao Shen, Matija Snuderl, Theodore Vougiouklakis, Nick Vulpescu, Gael Westby, Paul Zappile, Yutong Zhang  
EPI\_ISL\_420571 hCoV-19/USA/NY-NYUMC56/2020 North America / USA / New York / Nassau County 2020-03-18 NYU Langone Health Departments of Pathology and Medicine, New York University School of Medicine Maria Aguerro-Rosenfeld, Brendan Belovarac, Margaret Black, Ludovic Boytard, John Cadley, Paolo Cotzia, John Chen, Dacia Dimartino, Xiaojun Feng, Tatyana Gindin, Adriana Heguy, Megan Hogan, Emily Huang, George Jour, Andrew Lytle, Christian Marier, Matthew T. Maurano, Mark J. Mulligan, Peter Meyn, Iman Osman, Jared Pinnell, Sitharam Ramaswami, Amy Rapkiewicz, Marie Samanovic-Golden, Antonio Serrano, Guomiao Shen, Matija Snuderl, Theodore Vougiouklakis, Nick Vulpescu, Gael Westby, Paul Zappile, Yutong Zhang  
EPI\_ISL\_420572 hCoV-19/USA/NY-NYUMC57/2020 North America / USA / New York / Nassau County 2020-03-17 NYU Langone Health Departments of Pathology and Medicine, New York University School of Medicine Maria Aguerro-Rosenfeld, Brendan Belovarac, Margaret Black, Ludovic Boytard, John Cadley, Paolo Cotzia, John Chen, Dacia Dimartino, Xiaojun Feng, Tatyana Gindin, Adriana Heguy, Megan Hogan, Emily Huang, George Jour, Andrew Lytle, Christian Marier, Matthew T. Maurano, Mark J. Mulligan, Peter Meyn, Iman Osman, Jared Pinnell, Sitharam Ramaswami, Amy Rapkiewicz, Marie Samanovic-Golden, Antonio Serrano, Guomiao Shen, Matija Snuderl, Theodore Vougiouklakis, Nick Vulpescu, Gael Westby, Paul Zappile, Yutong Zhang  
EPI\_ISL\_420573 hCoV-19/USA/NY-NYUMC58/2020 North America / USA / New York / Manhattan 2020-03-18 NYU Langone Health Departments of Pathology and Medicine, New York University School of Medicine Maria Aguerro-Rosenfeld, Brendan Belovarac, Margaret Black, Ludovic Boytard, John Cadley, Paolo Cotzia, John Chen, Dacia Dimartino, Xiaojun Feng, Tatyana Gindin, Adriana Heguy, Megan Hogan, Emily Huang, George Jour, Andrew

Lytle, Christian Marier, Matthew T. Maurano, Mark J. Mulligan, Peter Meyn, Iman Osman, Jared Pinnell, Sitharam Ramaswami, Amy Rapkiewicz, Marie Samanovic-Golden, Antonio Serrano, Guomiao Shen, Matija Snuderl, Theodore Vougiouklakis, Nick Vulpescu, Gael Westby, Paul Zappile, Yutong Zhang  
 EPI\_ISL\_420575 hCoV-19/USA/NY-NYUMC60/2020 North America / USA / New York / Nassau County 2020-03-18  
 NYU Langone Health Departments of Pathology and Medicine, New York University School of Medicine Maria Aguerro-Rosenfeld, Brendan Belovarac, Margaret Black, Ludovic Boytard, John Cadley, Paolo Cotzia, John Chen, Dacia Dimartino, Xiaojun Feng, Tatyana Gindin, Adriana Heguy, Megan Hogan, Emily Huang, George Jour, Andrew Lytle, Christian Marier, Matthew T. Maurano, Mark J. Mulligan, Peter Meyn, Iman Osman, Jared Pinnell, Sitharam Ramaswami, Amy Rapkiewicz, Marie Samanovic-Golden, Antonio Serrano, Guomiao Shen, Matija Snuderl, Theodore Vougiouklakis, Nick Vulpescu, Gael Westby, Paul Zappile, Yutong Zhang  
 EPI\_ISL\_420576 hCoV-19/USA/NY-NYUMC61/2020 North America / USA / New York 2020-03-18 NYU Langone Health Departments of Pathology and Medicine, New York University School of Medicine Maria Aguerro-Rosenfeld, Brendan Belovarac, Margaret Black, Ludovic Boytard, John Cadley, Paolo Cotzia, John Chen, Dacia Dimartino, Xiaojun Feng, Tatyana Gindin, Adriana Heguy, Megan Hogan, Emily Huang, George Jour, Andrew Lytle, Christian Marier, Matthew T. Maurano, Mark J. Mulligan, Peter Meyn, Iman Osman, Jared Pinnell, Sitharam Ramaswami, Amy Rapkiewicz, Marie Samanovic-Golden, Antonio Serrano, Guomiao Shen, Matija Snuderl, Theodore Vougiouklakis, Nick Vulpescu, Gael Westby, Paul Zappile, Yutong Zhang  
 EPI\_ISL\_420577 hCoV-19/USA/NY-NYUMC62/2020 North America / USA / New York / Manhattan 2020-03-18 NYU Langone Health Departments of Pathology and Medicine, New York University School of Medicine Maria Aguerro-Rosenfeld, Brendan Belovarac, Margaret Black, Ludovic Boytard, John Cadley, Paolo Cotzia, John Chen, Dacia Dimartino, Xiaojun Feng, Tatyana Gindin, Adriana Heguy, Megan Hogan, Emily Huang, George Jour, Andrew Lytle, Christian Marier, Matthew T. Maurano, Mark J. Mulligan, Peter Meyn, Iman Osman, Jared Pinnell, Sitharam Ramaswami, Amy Rapkiewicz, Marie Samanovic-Golden, Antonio Serrano, Guomiao Shen, Matija Snuderl, Theodore Vougiouklakis, Nick Vulpescu, Gael Westby, Paul Zappile, Yutong Zhang  
 EPI\_ISL\_420578 hCoV-19/USA/NY-NYUMC63/2020 North America / USA / New York / Manhattan 2020-03-18 NYU Langone Health Departments of Pathology and Medicine, New York University School of Medicine Maria Aguerro-Rosenfeld, Brendan Belovarac, Margaret Black, Ludovic Boytard, John Cadley, Paolo Cotzia, John Chen, Dacia Dimartino, Xiaojun Feng, Tatyana Gindin, Adriana Heguy, Megan Hogan, Emily Huang, George Jour, Andrew Lytle, Christian Marier, Matthew T. Maurano, Mark J. Mulligan, Peter Meyn, Iman Osman, Jared Pinnell, Sitharam Ramaswami, Amy Rapkiewicz, Marie Samanovic-Golden, Antonio Serrano, Guomiao Shen, Matija Snuderl, Theodore Vougiouklakis, Nick Vulpescu, Gael Westby, Paul Zappile, Yutong Zhang  
 EPI\_ISL\_420579 hCoV-19/USA/NY-NYUMC64/2020 North America / USA / New York / Manhattan 2020-03-18 NYU Langone Health Departments of Pathology and Medicine, New York University School of Medicine Maria Aguerro-Rosenfeld, Brendan Belovarac, Margaret Black, Ludovic Boytard, John Cadley, Paolo Cotzia, John Chen, Dacia Dimartino, Xiaojun Feng, Tatyana Gindin, Adriana Heguy, Megan Hogan, Emily Huang, George Jour, Andrew Lytle, Christian Marier, Matthew T. Maurano, Mark J. Mulligan, Peter Meyn, Iman Osman, Jared Pinnell, Sitharam Ramaswami, Amy Rapkiewicz, Marie Samanovic-Golden, Antonio Serrano, Guomiao Shen, Matija Snuderl, Theodore Vougiouklakis, Nick Vulpescu, Gael Westby, Paul Zappile, Yutong Zhang  
 EPI\_ISL\_420580 hCoV-19/USA/NY-NYUMC65/2020 North America / USA / New York / Manhattan 2020-03-18 NYU Langone Health Departments of Pathology and Medicine, New York University School of Medicine Maria Aguerro-Rosenfeld, Brendan Belovarac, Margaret Black, Ludovic Boytard, John Cadley, Paolo Cotzia, John Chen, Dacia Dimartino, Xiaojun Feng, Tatyana Gindin, Adriana Heguy, Megan Hogan, Emily Huang, George Jour, Andrew Lytle, Christian Marier, Matthew T. Maurano, Mark J. Mulligan, Peter Meyn, Iman Osman, Jared Pinnell, Sitharam Ramaswami, Amy Rapkiewicz, Marie Samanovic-Golden, Antonio Serrano, Guomiao Shen, Matija Snuderl, Theodore Vougiouklakis, Nick Vulpescu, Gael Westby, Paul Zappile, Yutong Zhang  
 EPI\_ISL\_420581 hCoV-19/USA/NY-NYUMC66/2020 North America / USA / New York / Manhattan 2020-03-18 NYU Langone Health Departments of Pathology and Medicine, New York University School of Medicine Maria Aguerro-Rosenfeld, Brendan Belovarac, Margaret Black, Ludovic Boytard, John Cadley, Paolo Cotzia, John Chen, Dacia Dimartino, Xiaojun Feng, Tatyana Gindin, Adriana Heguy, Megan Hogan, Emily Huang, George Jour, Andrew Lytle, Christian Marier, Matthew T. Maurano, Mark J. Mulligan, Peter Meyn, Iman Osman, Jared Pinnell, Sitharam Ramaswami, Amy Rapkiewicz, Marie Samanovic-Golden, Antonio Serrano, Guomiao Shen, Matija Snuderl, Theodore Vougiouklakis, Nick Vulpescu, Gael Westby, Paul Zappile, Yutong Zhang  
 EPI\_ISL\_420583 hCoV-19/Italy/TE6222/2020 Europe / Italy / Abruzzo 2020-03-23 Ospedale Civile Giuseppe Mazzini Istituto Zooprofilattico Sperimentale dell'Abruzzo e Molise "G. Caporale" Lorusso A, Marcacci M, Di Domenico M, Ancora M, Curini V, Mangone I, Rinaldi A, Di Pasquale A, Cammà C, Puglia I, Savini G  
 EPI\_ISL\_420585 hCoV-19/USA/NY-NYUMC69/2020 North America / USA / New York / Manhattan 2020-03-18 NYU Langone Health Departments of Pathology and Medicine, New York University School of Medicine Maria Aguerro-Rosenfeld, Brendan Belovarac, Margaret Black, Ludovic Boytard, John Cadley, Paolo Cotzia, John Chen, Dacia Dimartino, Xiaojun Feng, Tatyana Gindin, Adriana Heguy, Megan Hogan, Emily Huang, George Jour, Andrew Lytle, Christian Marier, Matthew T. Maurano, Mark J. Mulligan, Peter Meyn, Iman Osman, Jared Pinnell, Sitharam Ramaswami, Amy Rapkiewicz, Marie Samanovic-Golden, Antonio Serrano, Guomiao Shen, Matija Snuderl, Theodore Vougiouklakis, Nick Vulpescu, Gael Westby, Paul Zappile, Yutong Zhang  
 EPI\_ISL\_420586 hCoV-19/USA/NY-NYUMC70/2020 North America / USA / New York / Brooklyn 2020-03-19 NYU Langone Health Departments of Pathology and Medicine, New York University School of Medicine Maria Aguerro-Rosenfeld, Brendan Belovarac, Margaret Black, Ludovic Boytard, John Cadley, Paolo Cotzia, John Chen, Dacia Dimartino, Xiaojun Feng, Tatyana Gindin, Adriana Heguy, Megan Hogan, Emily Huang, George Jour, Andrew Lytle, Christian Marier, Matthew T. Maurano, Mark J. Mulligan, Peter Meyn, Iman Osman, Jared Pinnell, Sitharam Ramaswami, Amy Rapkiewicz, Marie Samanovic-Golden, Antonio Serrano, Guomiao Shen, Matija Snuderl, Theodore Vougiouklakis, Nick Vulpescu, Gael Westby, Paul Zappile, Yutong Zhang

|                                                                                                                        |                                                                                                                                                                                                                   |                                                      |            |                                                                                                                                                                                                                                                                                                                                                                                                                                                                                                                               |
|------------------------------------------------------------------------------------------------------------------------|-------------------------------------------------------------------------------------------------------------------------------------------------------------------------------------------------------------------|------------------------------------------------------|------------|-------------------------------------------------------------------------------------------------------------------------------------------------------------------------------------------------------------------------------------------------------------------------------------------------------------------------------------------------------------------------------------------------------------------------------------------------------------------------------------------------------------------------------|
| EPI_ISL_420587                                                                                                         | hCoV-19/USA/NY-NYUMC71/2020                                                                                                                                                                                       | North America / USA / New York / Manhattan           | 2020-03-18 |                                                                                                                                                                                                                                                                                                                                                                                                                                                                                                                               |
| NYU Langone Health                                                                                                     | Departments of Pathology and Medicine, New York University School of Medicine                                                                                                                                     |                                                      |            | Maria Aguero-Rosenfeld, Brendan Belovarac, Margaret Black, Ludovic Boytard, John Cadley, Paolo Cotzia, John Chen, Dacia Dimartino, Xiaojun Feng, Tatyana Gindin, Adriana Heguy, Megan Hogan, Emily Huang, George Jour, Andrew Lytle, Christian Marier, Matthew T. Maurano, Mark J. Mulligan, Peter Meyn, Iman Osman, Jared Pinnell, Sitharam Ramaswami, Amy Rapkiewicz, Marie Samanovic-Golden, Antonio Serrano, Guomiao Shen, Matija Snuderl, Theodore Vougiouklakis, Nick Vulpescu, Gael Westby, Paul Zappile, Yutong Zhang |
| EPI_ISL_420588                                                                                                         | hCoV-19/USA/NY-NYUMC72/2020                                                                                                                                                                                       | North America / USA / New York / Manhattan           | 2020-03-18 |                                                                                                                                                                                                                                                                                                                                                                                                                                                                                                                               |
| NYU Langone Health                                                                                                     | Departments of Pathology and Medicine, New York University School of Medicine                                                                                                                                     |                                                      |            | Maria Aguero-Rosenfeld, Brendan Belovarac, Margaret Black, Ludovic Boytard, John Cadley, Paolo Cotzia, John Chen, Dacia Dimartino, Xiaojun Feng, Tatyana Gindin, Adriana Heguy, Megan Hogan, Emily Huang, George Jour, Andrew Lytle, Christian Marier, Matthew T. Maurano, Mark J. Mulligan, Peter Meyn, Iman Osman, Jared Pinnell, Sitharam Ramaswami, Amy Rapkiewicz, Marie Samanovic-Golden, Antonio Serrano, Guomiao Shen, Matija Snuderl, Theodore Vougiouklakis, Nick Vulpescu, Gael Westby, Paul Zappile, Yutong Zhang |
| EPI_ISL_420589                                                                                                         | hCoV-19/USA/NY-NYUMC73/2020                                                                                                                                                                                       | North America / USA / New York / Manhattan           | 2020-03-18 |                                                                                                                                                                                                                                                                                                                                                                                                                                                                                                                               |
| NYU Langone Health                                                                                                     | Departments of Pathology and Medicine, New York University School of Medicine                                                                                                                                     |                                                      |            | Maria Aguero-Rosenfeld, Brendan Belovarac, Margaret Black, Ludovic Boytard, John Cadley, Paolo Cotzia, John Chen, Dacia Dimartino, Xiaojun Feng, Tatyana Gindin, Adriana Heguy, Megan Hogan, Emily Huang, George Jour, Andrew Lytle, Christian Marier, Matthew T. Maurano, Mark J. Mulligan, Peter Meyn, Iman Osman, Jared Pinnell, Sitharam Ramaswami, Amy Rapkiewicz, Marie Samanovic-Golden, Antonio Serrano, Guomiao Shen, Matija Snuderl, Theodore Vougiouklakis, Nick Vulpescu, Gael Westby, Paul Zappile, Yutong Zhang |
| EPI_ISL_420590                                                                                                         | hCoV-19/USA/NY-NYUMC74/2020                                                                                                                                                                                       | North America / USA / New York / Nassau County       | 2020-03-18 |                                                                                                                                                                                                                                                                                                                                                                                                                                                                                                                               |
| NYU Langone Health                                                                                                     | Departments of Pathology and Medicine, New York University School of Medicine                                                                                                                                     |                                                      |            | Maria Aguero-Rosenfeld, Brendan Belovarac, Margaret Black, Ludovic Boytard, John Cadley, Paolo Cotzia, John Chen, Dacia Dimartino, Xiaojun Feng, Tatyana Gindin, Adriana Heguy, Megan Hogan, Emily Huang, George Jour, Andrew Lytle, Christian Marier, Matthew T. Maurano, Mark J. Mulligan, Peter Meyn, Iman Osman, Jared Pinnell, Sitharam Ramaswami, Amy Rapkiewicz, Marie Samanovic-Golden, Antonio Serrano, Guomiao Shen, Matija Snuderl, Theodore Vougiouklakis, Nick Vulpescu, Gael Westby, Paul Zappile, Yutong Zhang |
| EPI_ISL_420591                                                                                                         | hCoV-19/USA/NY-NYUMC75/2020                                                                                                                                                                                       | North America / USA / New York / Manhattan           | 2020-03-18 |                                                                                                                                                                                                                                                                                                                                                                                                                                                                                                                               |
| NYU Langone Health                                                                                                     | Departments of Pathology and Medicine, New York University School of Medicine                                                                                                                                     |                                                      |            | Maria Aguero-Rosenfeld, Brendan Belovarac, Margaret Black, Ludovic Boytard, John Cadley, Paolo Cotzia, John Chen, Dacia Dimartino, Xiaojun Feng, Tatyana Gindin, Adriana Heguy, Megan Hogan, Emily Huang, George Jour, Andrew Lytle, Christian Marier, Matthew T. Maurano, Mark J. Mulligan, Peter Meyn, Iman Osman, Jared Pinnell, Sitharam Ramaswami, Amy Rapkiewicz, Marie Samanovic-Golden, Antonio Serrano, Guomiao Shen, Matija Snuderl, Theodore Vougiouklakis, Nick Vulpescu, Gael Westby, Paul Zappile, Yutong Zhang |
| EPI_ISL_420598                                                                                                         | hCoV-19/Argentina/C3013/2020                                                                                                                                                                                      | South America / Argentina                            | 2020-03-22 | Servicio                                                                                                                                                                                                                                                                                                                                                                                                                                                                                                                      |
| Virosis Respiratorias-Departamento Virología-INEI                                                                      | Instituto Nacional Enfermedades Infecciosas C.G.Malbran                                                                                                                                                           |                                                      |            | Baumeister E., Avaro M., Benedetti E., Russo M., Dattero ME, Pontoriero A., Cisterna D., Molina V., Perandones C., Tuduri E., Lorenzo F., Poklepovich T., Campos J.                                                                                                                                                                                                                                                                                                                                                           |
| EPI_ISL_420599                                                                                                         | hCoV-19/Argentina/C1374/2020                                                                                                                                                                                      | South America / Argentina                            | 2020-03-18 | Servicio                                                                                                                                                                                                                                                                                                                                                                                                                                                                                                                      |
| Virosis Respiratorias-Departamento Virología-INEI                                                                      | Instituto Nacional Enfermedades Infecciosas C.G.Malbran                                                                                                                                                           |                                                      |            | Baumeister E., Avaro M., Benedetti E., Russo M., Dattero ME, Pontoriero A., Cisterna D., Molina V., Perandones C., Tuduri E., Lorenzo F., Poklepovich T., Campos J.                                                                                                                                                                                                                                                                                                                                                           |
| EPI_ISL_420800                                                                                                         | hCoV-19/Korea/BA-ACH-2718/2020                                                                                                                                                                                    | Asia / Korea                                         | 2020-02-29 | Brian D. Allgood Army Community Hospital                                                                                                                                                                                                                                                                                                                                                                                                                                                                                      |
| Pathogen Discovery, Respiratory Viruses Branch, Division of Viral Diseases, Centers for Disease Control and Prevention | Krista Queen, Yan Li, Ying Tao, Jing Zhang, Anne Uehara, Clinton R. Paden, Haibin Wang, Rachel Marine, Mary S. Keckler, Alison S. Laufer Halpin, Jasmine Padilla, Justin Lee, Christopher A. Elkins, Suxiang Tong |                                                      |            |                                                                                                                                                                                                                                                                                                                                                                                                                                                                                                                               |
| EPI_ISL_420801                                                                                                         | hCoV-19/Korea/BA-ACH-2719/2020                                                                                                                                                                                    | Asia / Korea                                         | 2020-02-29 | Brian D. Allgood Army Community Hospital                                                                                                                                                                                                                                                                                                                                                                                                                                                                                      |
| Pathogen Discovery, Respiratory Viruses Branch, Division of Viral Diseases, Centers for Disease Control and Prevention | Krista Queen, Yan Li, Ying Tao, Jing Zhang, Anne Uehara, Clinton R. Paden, Haibin Wang, Rachel Marine, Mary S. Keckler, Alison S. Laufer Halpin, Jasmine Padilla, Justin Lee, Christopher A. Elkins, Suxiang Tong |                                                      |            |                                                                                                                                                                                                                                                                                                                                                                                                                                                                                                                               |
| EPI_ISL_420803                                                                                                         | hCoV-19/USA/UT-089/2020                                                                                                                                                                                           | North America / USA / Utah                           | 2020-03-12 | Utah Public Health Laboratory                                                                                                                                                                                                                                                                                                                                                                                                                                                                                                 |
| Utah Public Health Laboratory                                                                                          | Erin Young, Kelly Oakeson                                                                                                                                                                                         |                                                      |            |                                                                                                                                                                                                                                                                                                                                                                                                                                                                                                                               |
| EPI_ISL_420810                                                                                                         | hCoV-19/USA/UT-0290/2020                                                                                                                                                                                          | North America / USA / Utah                           | 2020-03-27 | Utah Public Health Laboratory                                                                                                                                                                                                                                                                                                                                                                                                                                                                                                 |
| Utah Public Health Laboratory                                                                                          | Erin Young, Kelly Oakeson                                                                                                                                                                                         |                                                      |            |                                                                                                                                                                                                                                                                                                                                                                                                                                                                                                                               |
| EPI_ISL_420812                                                                                                         | hCoV-19/USA/UT-0297/2020                                                                                                                                                                                          | North America / USA / Utah                           | 2020-03-27 | Utah Public Health Laboratory                                                                                                                                                                                                                                                                                                                                                                                                                                                                                                 |
| Utah Public Health Laboratory                                                                                          | Erin Young, Kelly Oakeson                                                                                                                                                                                         |                                                      |            |                                                                                                                                                                                                                                                                                                                                                                                                                                                                                                                               |
| EPI_ISL_420814                                                                                                         | hCoV-19/USA/UT-0301/2020                                                                                                                                                                                          | North America / USA / Utah                           | 2020-03-27 | Utah Public Health Laboratory                                                                                                                                                                                                                                                                                                                                                                                                                                                                                                 |
| Utah Public Health Laboratory                                                                                          | Erin Young, Kelly Oakeson                                                                                                                                                                                         |                                                      |            |                                                                                                                                                                                                                                                                                                                                                                                                                                                                                                                               |
| EPI_ISL_420838                                                                                                         | hCoV-19/DRC/253/2020                                                                                                                                                                                              | Africa / Democratic Republic of the Congo / Kinshasa | 2020-03-22 |                                                                                                                                                                                                                                                                                                                                                                                                                                                                                                                               |
| Viral Respiratory Lab, National Institute for Biomedical Research (INRB)                                               | Pathogen Sequencing Lab, National Institute for Biomedical Research (INRB)                                                                                                                                        |                                                      |            | Placide Mbala-Kingebeni, Edith Nkwembe, Eddy Kinganda-Lusamaki, Amuri Aziza, Catherine Pratt, Matthias Pauthner, Josh Quick, Allison Black, James Hadfield, Trevor Bedford, Ian Goodfellow, Nick Loman, Kristian Andersen, Michael Wiley, Steve Ahuka-Mundeke, Jean-Jacques Muyembe Tamfum                                                                                                                                                                                                                                    |
| EPI_ISL_420841                                                                                                         | hCoV-19/DRC/300/2020                                                                                                                                                                                              | Africa / Democratic Republic of the Congo / Sud Kivu | 2020-03-22 |                                                                                                                                                                                                                                                                                                                                                                                                                                                                                                                               |
| Viral Respiratory Lab, National Institute for Biomedical Research (INRB)                                               | Pathogen Sequencing Lab, National Institute for Biomedical Research (INRB)                                                                                                                                        |                                                      |            | Placide Mbala-Kingebeni, Edith Nkwembe, Eddy Kinganda-                                                                                                                                                                                                                                                                                                                                                                                                                                                                        |

Lusamaki, Amuri Aziza, Catherine Pratt, Matthias Pauthner, Josh Quick, Allison Black, James Hadfield, Trevor Bedford, Ian Goodfellow, Nick Loman, Kristian Andersen, Michael Wiley, Steve Ahuka-Mundeke, Jean-Jacques Muyembe Tamfum

EPI\_ISL\_420844 hCoV-19/DRC/355/2020 Africa / Democratic Republic of the Congo / Kinshasa 2020-03 Viral Respiratory Lab, National Institute for Biomedical Research (INRB) Pathogen Sequencing Lab, National Institute for Biomedical Research (INRB) Placide Mbala-Kingebeni, Edith Nkwembe, Eddy Kinganda-Lusamaki, Amuri Aziza, Catherine Pratt, Matthias Pauthner, Josh Quick, Allison Black, James Hadfield, Trevor Bedford, Ian Goodfellow, Nick Loman, Kristian Andersen, Michael Wiley, Steve Ahuka-Mundeke, Jean-Jacques Muyembe Tamfum

EPI\_ISL\_420845 hCoV-19/DRC/397/2020 Africa / Democratic Republic of the Congo / Kinshasa 2020-03-26 Viral Respiratory Lab, National Institute for Biomedical Research (INRB) Pathogen Sequencing Lab, National Institute for Biomedical Research (INRB) Placide Mbala-Kingebeni, Edith Nkwembe, Eddy Kinganda-Lusamaki, Amuri Aziza, Catherine Pratt, Matthias Pauthner, Josh Quick, Allison Black, James Hadfield, Trevor Bedford, Ian Goodfellow, Nick Loman, Kristian Andersen, Michael Wiley, Steve Ahuka-Mundeke, Jean-Jacques Muyembe Tamfum

EPI\_ISL\_420846 hCoV-19/DRC/400/2020 Africa / Democratic Republic of the Congo / Kinshasa 2020-03 Viral Respiratory Lab, National Institute for Biomedical Research (INRB) Pathogen Sequencing Lab, National Institute for Biomedical Research (INRB) Placide Mbala-Kingebeni, Edith Nkwembe, Eddy Kinganda-Lusamaki, Amuri Aziza, Catherine Pratt, Matthias Pauthner, Josh Quick, Allison Black, James Hadfield, Trevor Bedford, Ian Goodfellow, Nick Loman, Kristian Andersen, Michael Wiley, Steve Ahuka-Mundeke, Jean-Jacques Muyembe Tamfum

EPI\_ISL\_420847 hCoV-19/DRC/431/2020 Africa / Democratic Republic of the Congo 2020-03-26 Viral Respiratory Lab, National Institute for Biomedical Research (INRB) Pathogen Sequencing Lab, National Institute for Biomedical Research (INRB) Placide Mbala-Kingebeni, Edith Nkwembe, Eddy Kinganda-Lusamaki, Amuri Aziza, Catherine Pratt, Matthias Pauthner, Josh Quick, Allison Black, James Hadfield, Trevor Bedford, Ian Goodfellow, Nick Loman, Kristian Andersen, Michael Wiley, Steve Ahuka-Mundeke, Jean-Jacques Muyembe Tamfum

EPI\_ISL\_420849 hCoV-19/DRC/523/2020 Africa / Democratic Republic of the Congo / Kinshasa 2020-03-28 Viral Respiratory Lab, National Institute for Biomedical Research (INRB) Pathogen Sequencing Lab, National Institute for Biomedical Research (INRB) Placide Mbala-Kingebeni, Edith Nkwembe, Eddy Kinganda-Lusamaki, Amuri Aziza, Catherine Pratt, Matthias Pauthner, Josh Quick, Allison Black, James Hadfield, Trevor Bedford, Ian Goodfellow, Nick Loman, Kristian Andersen, Michael Wiley, Steve Ahuka-Mundeke, Jean-Jacques Muyembe Tamfum

EPI\_ISL\_420851 hCoV-19/DRC/376/2020 Africa / Democratic Republic of the Congo / Kinshasa 2020-03-25 Viral Respiratory Lab, National Institute for Biomedical Research (INRB) Pathogen Sequencing Lab, National Institute for Biomedical Research (INRB) Placide Mbala-Kingebeni, Edith Nkwembe, Eddy Kinganda-Lusamaki, Amuri Aziza, Catherine Pratt, Matthias Pauthner, Josh Quick, Allison Black, James Hadfield, Trevor Bedford, Ian Goodfellow, Nick Loman, Kristian Andersen, Michael Wiley, Steve Ahuka-Mundeke, Jean-Jacques Muyembe Tamfum

EPI\_ISL\_420852 hCoV-19/DRC/396/2020 Africa / Democratic Republic of the Congo / Kinshasa 2020-03-26 Viral Respiratory Lab, National Institute for Biomedical Research (INRB) Pathogen Sequencing Lab, National Institute for Biomedical Research (INRB) Placide Mbala-Kingebeni, Edith Nkwembe, Eddy Kinganda-Lusamaki, Amuri Aziza, Catherine Pratt, Matthias Pauthner, Josh Quick, Allison Black, James Hadfield, Trevor Bedford, Ian Goodfellow, Nick Loman, Kristian Andersen, Michael Wiley, Steve Ahuka-Mundeke, Jean-Jacques Muyembe Tamfum

EPI\_ISL\_420854 hCoV-19/DRC/521/2020 Africa / Democratic Republic of the Congo / Kinshasa 2020-03-25 Viral Respiratory Lab, National Institute for Biomedical Research (INRB) Pathogen Sequencing Lab, National Institute for Biomedical Research (INRB) Placide Mbala-Kingebeni, Edith Nkwembe, Eddy Kinganda-Lusamaki, Amuri Aziza, Catherine Pratt, Matthias Pauthner, Josh Quick, Allison Black, James Hadfield, Trevor Bedford, Ian Goodfellow, Nick Loman, Kristian Andersen, Michael Wiley, Steve Ahuka-Mundeke, Jean-Jacques Muyembe Tamfum

EPI\_ISL\_420855 hCoV-19/Australia/VIC-CBA1/2020 Oceania / Australia / Victoria 2020-03-23 Geelong Centre for Emerging Infectious Diseases Geelong Centre for Emerging Infectious Diseases Chamings,A., Raj Bhatta T., Alexandersen S.

EPI\_ISL\_420876 hCoV-19/Australia/VIC-CBA2/2020 Oceania / Australia / Victoria 2020-03-24 Geelong Centre for Emerging Infectious Diseases Geelong Centre for Emerging Infectious Diseases Chamings,A., Raj Bhatta T., Alexandersen S.

EPI\_ISL\_420877 hCoV-19/Australia/VIC-CBA3/2020 Oceania / Australia / Victoria 2020-03-28 Geelong Centre for Emerging Infectious Diseases Geelong Centre for Emerging Infectious Diseases Chamings,A., Raj Bhatta T., Alexandersen S.

EPI\_ISL\_420878 hCoV-19/Australia/QLDID929/2020 Oceania / Australia / Queensland / Brisbane 2020-03-24 Mater Pathology Public Health Virology Laboratory Bixing Huang, Alyssa Pyke, Amanda De Jong, Andrew Van Den Hurk, Carmel Taylor, David Warrilow, Doris Genge, Elisabeth Gamez, Glen Hewitson, Ian Maxwell Mackay, Inga Sultana, Jamie McMahon, Jean Barcelon, Judy Northill, Mitchell Finger, Natalie Simpson, Neelima Nair, Peter Burtonclay, Peter Moore, Sarah Wheatley, Sean Moody, Sonja Hall-Mendelin, Timothy Gardam, and Frederick Moore

EPI\_ISL\_420879 hCoV-19/Australia/QLDID931/2020 Oceania / Australia / Queensland / Brisbane 2020-03-25 Mater Pathology Public Health Virology Laboratory Bixing Huang, Alyssa Pyke, Amanda De Jong, Andrew Van Den Hurk, Carmel Taylor, David Warrilow, Doris Genge, Elisabeth Gamez, Glen Hewitson, Ian Maxwell Mackay, Inga Sultana, Jamie McMahon, Jean Barcelon, Judy Northill, Mitchell Finger, Natalie Simpson, Neelima Nair, Peter Burtonclay, Peter Moore, Sarah Wheatley, Sean Moody, Sonja Hall-Mendelin, Timothy Gardam, and Frederick Moore

EPI\_ISL\_420889 hCoV-19/Japan/Hu\_DP\_Kng\_19-031/2020 Asia / Japan 2020-02-14 unknown Takayuki Hishiki Kanagawa Prefectural Institute of Public Health Hishiki,T., Suzuki,R., Sakuragi,J., Usui,K., Tanaka,Y., Kawai,J., Kogo,Y., Matsuki,Y., An,T., Hayashizaki,Y. and Takasaki,T.











|                                                                                                                                                                                                                                           |                                  |                                   |            |                                                                                                                                                                                                                                                                                                                                                  |                                                                                                |  |
|-------------------------------------------------------------------------------------------------------------------------------------------------------------------------------------------------------------------------------------------|----------------------------------|-----------------------------------|------------|--------------------------------------------------------------------------------------------------------------------------------------------------------------------------------------------------------------------------------------------------------------------------------------------------------------------------------------------------|------------------------------------------------------------------------------------------------|--|
| Microbiology Services Colindale, Public Health England Monica Galiano, Shahjahan Miah, Angie Lackenby, Omolola Akinbami, Tiina Talts, Leena Bhaw, Richard Myers, Steven Platt, Kirstin Edwards, Jonathan Hubb, Joanna Ellis, Maria Zambon |                                  |                                   |            |                                                                                                                                                                                                                                                                                                                                                  |                                                                                                |  |
| EPI_ISL_421899                                                                                                                                                                                                                            | hCoV-19/England/20139026904/2020 | Europe / United Kingdom / England | 2020-03-26 | Respiratory Virus Unit, Microbiology Services Colindale, Public Health England Respiratory Virus Unit, Microbiology Services Colindale, Public Health England Monica Galiano, Shahjahan Miah, Angie Lackenby, Omolola Akinbami, Tiina Talts, Leena Bhaw, Richard Myers, Steven Platt, Kirstin Edwards, Jonathan Hubb, Joanna Ellis, Maria Zambon |                                                                                                |  |
| EPI_ISL_423000                                                                                                                                                                                                                            | hCoV-19/USA/WA-UW-1420/2020      | North America / USA / Washington  | 2020-03-18 | UW                                                                                                                                                                                                                                                                                                                                               | Virology Lab UW Virology Lab Pavitra Roychoudhury, Hong Xie, Keith Jerome, Alexander Greninger |  |
| EPI_ISL_423001                                                                                                                                                                                                                            | hCoV-19/USA/WA-UW-1567/2020      | North America / USA / Washington  | 2020-03-19 | UW                                                                                                                                                                                                                                                                                                                                               | Virology Lab UW Virology Lab Pavitra Roychoudhury, Hong Xie, Keith Jerome, Alexander Greninger |  |
| EPI_ISL_423002                                                                                                                                                                                                                            | hCoV-19/USA/WA-UW-1593/2020      | North America / USA / Washington  | 2020-03-19 | UW                                                                                                                                                                                                                                                                                                                                               | Virology Lab UW Virology Lab Pavitra Roychoudhury, Hong Xie, Keith Jerome, Alexander Greninger |  |
| EPI_ISL_423003                                                                                                                                                                                                                            | hCoV-19/USA/WA-UW-1583/2020      | North America / USA / Washington  | 2020-03-19 | UW                                                                                                                                                                                                                                                                                                                                               | Virology Lab UW Virology Lab Pavitra Roychoudhury, Hong Xie, Keith Jerome, Alexander Greninger |  |
| EPI_ISL_423004                                                                                                                                                                                                                            | hCoV-19/USA/WA-UW-1581/2020      | North America / USA / Washington  | 2020-03-19 | UW                                                                                                                                                                                                                                                                                                                                               | Virology Lab UW Virology Lab Pavitra Roychoudhury, Hong Xie, Keith Jerome, Alexander Greninger |  |
| EPI_ISL_423005                                                                                                                                                                                                                            | hCoV-19/USA/WA-UW-1603/2020      | North America / USA / Washington  | 2020-03-19 | UW                                                                                                                                                                                                                                                                                                                                               | Virology Lab UW Virology Lab Pavitra Roychoudhury, Hong Xie, Keith Jerome, Alexander Greninger |  |
| EPI_ISL_423006                                                                                                                                                                                                                            | hCoV-19/USA/WA-UW-1611/2020      | North America / USA / Washington  | 2020-03-19 | UW                                                                                                                                                                                                                                                                                                                                               | Virology Lab UW Virology Lab Pavitra Roychoudhury, Hong Xie, Keith Jerome, Alexander Greninger |  |
| EPI_ISL_423007                                                                                                                                                                                                                            | hCoV-19/USA/WA-UW-1448/2020      | North America / USA / Washington  | 2020-03-19 | UW                                                                                                                                                                                                                                                                                                                                               | Virology Lab UW Virology Lab Pavitra Roychoudhury, Hong Xie, Keith Jerome, Alexander Greninger |  |
| EPI_ISL_423008                                                                                                                                                                                                                            | hCoV-19/USA/WA-UW-1426/2020      | North America / USA / Washington  | 2020-03-18 | UW                                                                                                                                                                                                                                                                                                                                               | Virology Lab UW Virology Lab Pavitra Roychoudhury, Hong Xie, Keith Jerome, Alexander Greninger |  |
| EPI_ISL_423010                                                                                                                                                                                                                            | hCoV-19/USA/WA-UW-1446/2020      | North America / USA / Washington  | 2020-03-18 | UW                                                                                                                                                                                                                                                                                                                                               | Virology Lab UW Virology Lab Pavitra Roychoudhury, Hong Xie, Keith Jerome, Alexander Greninger |  |
| EPI_ISL_423011                                                                                                                                                                                                                            | hCoV-19/USA/WA-UW-1561/2020      | North America / USA / Washington  | 2020-03-19 | UW                                                                                                                                                                                                                                                                                                                                               | Virology Lab UW Virology Lab Pavitra Roychoudhury, Hong Xie, Keith Jerome, Alexander Greninger |  |
| EPI_ISL_423012                                                                                                                                                                                                                            | hCoV-19/USA/WA-UW-1588/2020      | North America / USA / Washington  | 2020-03-19 | UW                                                                                                                                                                                                                                                                                                                                               | Virology Lab UW Virology Lab Pavitra Roychoudhury, Hong Xie, Keith Jerome, Alexander Greninger |  |
| EPI_ISL_423013                                                                                                                                                                                                                            | hCoV-19/USA/WA-UW-1586/2020      | North America / USA / Washington  | 2020-03-19 | UW                                                                                                                                                                                                                                                                                                                                               | Virology Lab UW Virology Lab Pavitra Roychoudhury, Hong Xie, Keith Jerome, Alexander Greninger |  |
| EPI_ISL_423014                                                                                                                                                                                                                            | hCoV-19/USA/WA-UW-1587/2020      | North America / USA / Washington  | 2020-03-19 | UW                                                                                                                                                                                                                                                                                                                                               | Virology Lab UW Virology Lab Pavitra Roychoudhury, Hong Xie, Keith Jerome, Alexander Greninger |  |
| EPI_ISL_423015                                                                                                                                                                                                                            | hCoV-19/USA/WA-UW-1552/2020      | North America / USA / Washington  | 2020-03-19 | UW                                                                                                                                                                                                                                                                                                                                               | Virology Lab UW Virology Lab Pavitra Roychoudhury, Hong Xie, Keith Jerome, Alexander Greninger |  |
| EPI_ISL_423016                                                                                                                                                                                                                            | hCoV-19/USA/WA-UW-1578/2020      | North America / USA / Washington  | 2020-03-19 | UW                                                                                                                                                                                                                                                                                                                                               | Virology Lab UW Virology Lab Pavitra Roychoudhury, Hong Xie, Keith Jerome, Alexander Greninger |  |
| EPI_ISL_423017                                                                                                                                                                                                                            | hCoV-19/USA/WA-UW-1591/2020      | North America / USA / Washington  | 2020-03-19 | UW                                                                                                                                                                                                                                                                                                                                               | Virology Lab UW Virology Lab Pavitra Roychoudhury, Hong Xie, Keith Jerome, Alexander Greninger |  |
| EPI_ISL_423018                                                                                                                                                                                                                            | hCoV-19/USA/WA-UW-1576/2020      | North America / USA / Washington  | 2020-03-19 | UW                                                                                                                                                                                                                                                                                                                                               | Virology Lab UW Virology Lab Pavitra Roychoudhury, Hong Xie, Keith Jerome, Alexander Greninger |  |
| EPI_ISL_423019                                                                                                                                                                                                                            | hCoV-19/USA/WA-UW-1574/2020      | North America / USA / Washington  | 2020-03-19 | UW                                                                                                                                                                                                                                                                                                                                               | Virology Lab UW Virology Lab Pavitra Roychoudhury, Hong Xie, Keith Jerome, Alexander Greninger |  |
| EPI_ISL_423020                                                                                                                                                                                                                            | hCoV-19/USA/WA-UW-1570/2020      | North America / USA / Washington  | 2020-03-19 | UW                                                                                                                                                                                                                                                                                                                                               | Virology Lab UW Virology Lab Pavitra Roychoudhury, Hong Xie, Keith Jerome, Alexander Greninger |  |
| EPI_ISL_423021                                                                                                                                                                                                                            | hCoV-19/USA/WA-UW-1569/2020      | North America / USA / Washington  | 2020-03-19 | UW                                                                                                                                                                                                                                                                                                                                               | Virology Lab UW Virology Lab Pavitra Roychoudhury, Hong Xie, Keith Jerome, Alexander Greninger |  |
| EPI_ISL_423022                                                                                                                                                                                                                            | hCoV-19/USA/WA-UW-1562/2020      | North America / USA / Washington  | 2020-03-19 | UW                                                                                                                                                                                                                                                                                                                                               | Virology Lab UW Virology Lab Pavitra Roychoudhury, Hong Xie, Keith Jerome, Alexander Greninger |  |
| EPI_ISL_423023                                                                                                                                                                                                                            | hCoV-19/USA/UN-UW-1449/2020      | North America / USA               | 2020-03    | UW Virology Lab                                                                                                                                                                                                                                                                                                                                  | UW Virology Lab Pavitra Roychoudhury, Hong Xie, Keith Jerome, Alexander Greninger              |  |
| EPI_ISL_423024                                                                                                                                                                                                                            | hCoV-19/USA/WA-UW-1435/2020      | North America / USA / Washington  | 2020-03-17 | UW                                                                                                                                                                                                                                                                                                                                               | Virology Lab UW Virology Lab Pavitra Roychoudhury, Hong Xie, Keith Jerome, Alexander Greninger |  |
| EPI_ISL_423025                                                                                                                                                                                                                            | hCoV-19/USA/WA-UW-1441/2020      | North America / USA / Washington  | 2020-03-18 | UW                                                                                                                                                                                                                                                                                                                                               | Virology Lab UW Virology Lab Pavitra Roychoudhury, Hong Xie, Keith Jerome, Alexander Greninger |  |
| EPI_ISL_423026                                                                                                                                                                                                                            | hCoV-19/USA/WA-UW-1440/2020      | North America / USA / Washington  | 2020-03-18 | UW                                                                                                                                                                                                                                                                                                                                               | Virology Lab UW Virology Lab Pavitra Roychoudhury, Hong Xie, Keith Jerome, Alexander Greninger |  |
| EPI_ISL_423027                                                                                                                                                                                                                            | hCoV-19/USA/WA-UW-1473/2020      | North America / USA / Washington  | 2020-03-18 | UW                                                                                                                                                                                                                                                                                                                                               | Virology Lab UW Virology Lab Pavitra Roychoudhury, Hong Xie, Keith Jerome, Alexander Greninger |  |
| EPI_ISL_423028                                                                                                                                                                                                                            | hCoV-19/USA/WA-UW-1470/2020      | North America / USA / Washington  | 2020-03-18 | UW                                                                                                                                                                                                                                                                                                                                               | Virology Lab UW Virology Lab Pavitra Roychoudhury, Hong Xie, Keith Jerome, Alexander Greninger |  |
| EPI_ISL_423029                                                                                                                                                                                                                            | hCoV-19/USA/WA-UW-1471/2020      | North America / USA / Washington  | 2020-03-18 | UW                                                                                                                                                                                                                                                                                                                                               | Virology Lab UW Virology Lab Pavitra Roychoudhury, Hong Xie, Keith Jerome, Alexander Greninger |  |
| EPI_ISL_423030                                                                                                                                                                                                                            | hCoV-19/USA/WA-UW-1433/2020      | North America / USA / Washington  | 2020-03-18 | UW                                                                                                                                                                                                                                                                                                                                               | Virology Lab UW Virology Lab Pavitra Roychoudhury, Hong Xie, Keith Jerome, Alexander Greninger |  |
| EPI_ISL_423031                                                                                                                                                                                                                            | hCoV-19/USA/WA-UW-1425/2020      | North America / USA / Washington  | 2020-03-18 | UW                                                                                                                                                                                                                                                                                                                                               | Virology Lab UW Virology Lab Pavitra Roychoudhury, Hong Xie, Keith Jerome, Alexander Greninger |  |

|                                                                                |                                                                                                                                                                                                                                                                                                                                                               |                                   |            |    |
|--------------------------------------------------------------------------------|---------------------------------------------------------------------------------------------------------------------------------------------------------------------------------------------------------------------------------------------------------------------------------------------------------------------------------------------------------------|-----------------------------------|------------|----|
| EPI_ISL_423032                                                                 | hCoV-19/USA/WA-UW-1608/2020                                                                                                                                                                                                                                                                                                                                   | North America / USA / Washington  | 2020-03-18 | UW |
| Virology Lab                                                                   | UW Virology Lab Pavitra Roychoudhury, Hong Xie, Keith Jerome, Alexander Greninger                                                                                                                                                                                                                                                                             |                                   |            |    |
| EPI_ISL_423033                                                                 | hCoV-19/USA/WA-UW-1599/2020                                                                                                                                                                                                                                                                                                                                   | North America / USA / Washington  | 2020-03-18 | UW |
| Virology Lab                                                                   | UW Virology Lab Pavitra Roychoudhury, Hong Xie, Keith Jerome, Alexander Greninger                                                                                                                                                                                                                                                                             |                                   |            |    |
| EPI_ISL_423039                                                                 | hCoV-19/Thailand/Bangkok-0017/2020                                                                                                                                                                                                                                                                                                                            | Asia / Thailand / Bangkok         | 2020-03-21 |    |
| Ramathibodi Hospital                                                           | COVID-19 Network Investigations (CONI) Alliance Elizabeth Batty, Wasun Chantratita, Thanat Chookajorn, Stefan Fernandez, Angkana Huang, Anthony R. Jones, Khajohn Joonsalak, Chonticha Klungtong, Theerarat Kochakarn, Namfon Kotanan, Krittikorn Kumpornsin, Wudtichai Manasatienkij, Bhakbhoom Panthan, Ekawat Pasomsub, Insee Sensorn, Arporn Wangwiwatsin |                                   |            |    |
| EPI_ISL_423040                                                                 | hCoV-19/Thailand/Bangkok-0019/2020                                                                                                                                                                                                                                                                                                                            | Asia / Thailand / Bangkok         | 2020-03-20 |    |
| Ramathibodi Hospital                                                           | COVID-19 Network Investigations (CONI) Alliance Elizabeth Batty, Wasun Chantratita, Thanat Chookajorn, Stefan Fernandez, Angkana Huang, Anthony R. Jones, Khajohn Joonsalak, Chonticha Klungtong, Theerarat Kochakarn, Namfon Kotanan, Krittikorn Kumpornsin, Wudtichai Manasatienkij, Bhakbhoom Panthan, Ekawat Pasomsub, Insee Sensorn, Arporn Wangwiwatsin |                                   |            |    |
| EPI_ISL_423041                                                                 | hCoV-19/Thailand/Bangkok-0020/2020                                                                                                                                                                                                                                                                                                                            | Asia / Thailand / Bangkok         | 2020-03-21 |    |
| Ramathibodi Hospital                                                           | COVID-19 Network Investigations (CONI) Alliance Elizabeth Batty, Wasun Chantratita, Thanat Chookajorn, Stefan Fernandez, Angkana Huang, Anthony R. Jones, Khajohn Joonsalak, Chonticha Klungtong, Theerarat Kochakarn, Namfon Kotanan, Krittikorn Kumpornsin, Wudtichai Manasatienkij, Bhakbhoom Panthan, Ekawat Pasomsub, Insee Sensorn, Arporn Wangwiwatsin |                                   |            |    |
| EPI_ISL_423042                                                                 | hCoV-19/Thailand/Bangkok-0021/2020                                                                                                                                                                                                                                                                                                                            | Asia / Thailand / Bangkok         | 2020-03-24 |    |
| Ramathibodi Hospital                                                           | COVID-19 Network Investigations (CONI) Alliance Elizabeth Batty, Wasun Chantratita, Thanat Chookajorn, Stefan Fernandez, Angkana Huang, Anthony R. Jones, Khajohn Joonsalak, Chonticha Klungtong, Theerarat Kochakarn, Namfon Kotanan, Krittikorn Kumpornsin, Wudtichai Manasatienkij, Bhakbhoom Panthan, Ekawat Pasomsub, Insee Sensorn, Arporn Wangwiwatsin |                                   |            |    |
| EPI_ISL_423043                                                                 | hCoV-19/Thailand/Bangkok-0022/2020                                                                                                                                                                                                                                                                                                                            | Asia / Thailand / Bangkok         | 2020-03-18 |    |
| Ramathibodi Hospital                                                           | COVID-19 Network Investigations (CONI) Alliance Elizabeth Batty, Wasun Chantratita, Thanat Chookajorn, Stefan Fernandez, Angkana Huang, Anthony R. Jones, Khajohn Joonsalak, Chonticha Klungtong, Theerarat Kochakarn, Namfon Kotanan, Krittikorn Kumpornsin, Wudtichai Manasatienkij, Bhakbhoom Panthan, Ekawat Pasomsub, Insee Sensorn, Arporn Wangwiwatsin |                                   |            |    |
| EPI_ISL_423044                                                                 | hCoV-19/England/20134000704/2020                                                                                                                                                                                                                                                                                                                              | Europe / United Kingdom / England | 2020-03-25 |    |
| Respiratory Virus Unit, Microbiology Services Colindale, Public Health England | Respiratory Virus Unit, Microbiology Services Colindale, Public Health England Monica Galiano, Shahjahan Miah, Angie Lackenby, Omolola Akinbami, Tiina Talts, Leena Bhaw, Richard Myers, Steven Platt, Kirstin Edwards, Jonathan Hubb, Joanna Ellis, Maria Zambon                                                                                             |                                   |            |    |
| EPI_ISL_423045                                                                 | hCoV-19/England/20134000804/2020                                                                                                                                                                                                                                                                                                                              | Europe / United Kingdom / England | 2020-03-24 |    |
| Respiratory Virus Unit, Microbiology Services Colindale, Public Health England | Respiratory Virus Unit, Microbiology Services Colindale, Public Health England Monica Galiano, Shahjahan Miah, Angie Lackenby, Omolola Akinbami, Tiina Talts, Leena Bhaw, Richard Myers, Steven Platt, Kirstin Edwards, Jonathan Hubb, Joanna Ellis, Maria Zambon                                                                                             |                                   |            |    |
| EPI_ISL_423047                                                                 | hCoV-19/England/20134001104/2020                                                                                                                                                                                                                                                                                                                              | Europe / United Kingdom / England | 2020-03-24 |    |
| Respiratory Virus Unit, Microbiology Services Colindale, Public Health England | Respiratory Virus Unit, Microbiology Services Colindale, Public Health England Monica Galiano, Shahjahan Miah, Angie Lackenby, Omolola Akinbami, Tiina Talts, Leena Bhaw, Richard Myers, Steven Platt, Kirstin Edwards, Jonathan Hubb, Joanna Ellis, Maria Zambon                                                                                             |                                   |            |    |
| EPI_ISL_423052                                                                 | hCoV-19/England/20134001904/2020                                                                                                                                                                                                                                                                                                                              | Europe / United Kingdom / England | 2020-03-19 |    |
| Respiratory Virus Unit, Microbiology Services Colindale, Public Health England | Respiratory Virus Unit, Microbiology Services Colindale, Public Health England Monica Galiano, Shahjahan Miah, Angie Lackenby, Omolola Akinbami, Tiina Talts, Leena Bhaw, Richard Myers, Steven Platt, Kirstin Edwards, Jonathan Hubb, Joanna Ellis, Maria Zambon                                                                                             |                                   |            |    |
| EPI_ISL_423053                                                                 | hCoV-19/England/20134002104/2020                                                                                                                                                                                                                                                                                                                              | Europe / United Kingdom / England | 2020-03-18 |    |
| Respiratory Virus Unit, Microbiology Services Colindale, Public Health England | Respiratory Virus Unit, Microbiology Services Colindale, Public Health England Monica Galiano, Shahjahan Miah, Angie Lackenby, Omolola Akinbami, Tiina Talts, Leena Bhaw, Richard Myers, Steven Platt, Kirstin Edwards, Jonathan Hubb, Joanna Ellis, Maria Zambon                                                                                             |                                   |            |    |
| EPI_ISL_423055                                                                 | hCoV-19/England/20134003004/2020                                                                                                                                                                                                                                                                                                                              | Europe / United Kingdom / England | 2020-03-19 |    |
| Respiratory Virus Unit, Microbiology Services Colindale, Public Health England | Respiratory Virus Unit, Microbiology Services Colindale, Public Health England Monica Galiano, Shahjahan Miah, Angie Lackenby, Omolola Akinbami, Tiina Talts, Leena Bhaw, Richard Myers, Steven Platt, Kirstin Edwards, Jonathan Hubb, Joanna Ellis, Maria Zambon                                                                                             |                                   |            |    |
| EPI_ISL_423057                                                                 | hCoV-19/England/20134003204/2020                                                                                                                                                                                                                                                                                                                              | Europe / United Kingdom / England | 2020-03-23 |    |
| Respiratory Virus Unit, Microbiology Services Colindale, Public Health England | Respiratory Virus Unit, Microbiology Services Colindale, Public Health England Monica Galiano, Shahjahan Miah, Angie Lackenby, Omolola Akinbami, Tiina Talts, Leena Bhaw, Richard Myers, Steven Platt, Kirstin Edwards, Jonathan Hubb, Joanna Ellis, Maria Zambon                                                                                             |                                   |            |    |
| EPI_ISL_423059                                                                 | hCoV-19/England/20134003404/2020                                                                                                                                                                                                                                                                                                                              | Europe / United Kingdom / England | 2020-03-24 |    |
| Respiratory Virus Unit, Microbiology Services Colindale, Public Health England | Respiratory Virus Unit, Microbiology Services Colindale, Public Health England Monica Galiano, Shahjahan Miah, Angie Lackenby, Omolola Akinbami, Tiina Talts, Leena Bhaw, Richard Myers, Steven Platt, Kirstin Edwards, Jonathan Hubb, Joanna Ellis, Maria Zambon                                                                                             |                                   |            |    |
| EPI_ISL_423063                                                                 | hCoV-19/England/20134004704/2020                                                                                                                                                                                                                                                                                                                              | Europe / United Kingdom / England | 2020-03-24 |    |









|                                                                                |                                                                                   |                                                                                                                                                                                    |            |  |  |                 |
|--------------------------------------------------------------------------------|-----------------------------------------------------------------------------------|------------------------------------------------------------------------------------------------------------------------------------------------------------------------------------|------------|--|--|-----------------|
| Respiratory Virus Unit, Microbiology Services Colindale, Public Health England | Respiratory Virus Unit, Microbiology Services Colindale, Public Health England    | Monica Galiano, Shahjahan Miah, Angie Lackenby, Omolola Akinbami, Tiina Talts, Leena Bhaw, Richard Myers, Steven Platt, Kirstin Edwards, Jonathan Hubb, Joanna Ellis, Maria Zambon |            |  |  |                 |
| EPI_ISL_424076                                                                 | hCoV-19/England/20129085704/2020                                                  | Europe / United Kingdom / England                                                                                                                                                  | 2020-03-21 |  |  |                 |
| Respiratory Virus Unit, Microbiology Services Colindale, Public Health England | Respiratory Virus Unit, Microbiology Services Colindale, Public Health England    | Monica Galiano, Shahjahan Miah, Angie Lackenby, Omolola Akinbami, Tiina Talts, Leena Bhaw, Richard Myers, Steven Platt, Kirstin Edwards, Jonathan Hubb, Joanna Ellis, Maria Zambon |            |  |  |                 |
| EPI_ISL_424078                                                                 | hCoV-19/England/20129089504/2020                                                  | Europe / United Kingdom / England                                                                                                                                                  | 2020-03-11 |  |  |                 |
| Respiratory Virus Unit, Microbiology Services Colindale, Public Health England | Respiratory Virus Unit, Microbiology Services Colindale, Public Health England    | Monica Galiano, Shahjahan Miah, Angie Lackenby, Omolola Akinbami, Tiina Talts, Leena Bhaw, Richard Myers, Steven Platt, Kirstin Edwards, Jonathan Hubb, Joanna Ellis, Maria Zambon |            |  |  |                 |
| EPI_ISL_424082                                                                 | hCoV-19/England/20129096604/2020                                                  | Europe / United Kingdom / England                                                                                                                                                  | 2020-03-11 |  |  |                 |
| Respiratory Virus Unit, Microbiology Services Colindale, Public Health England | Respiratory Virus Unit, Microbiology Services Colindale, Public Health England    | Monica Galiano, Shahjahan Miah, Angie Lackenby, Omolola Akinbami, Tiina Talts, Leena Bhaw, Richard Myers, Steven Platt, Kirstin Edwards, Jonathan Hubb, Joanna Ellis, Maria Zambon |            |  |  |                 |
| EPI_ISL_424084                                                                 | hCoV-19/England/20129096804/2020                                                  | Europe / United Kingdom / England                                                                                                                                                  | 2020-03-11 |  |  |                 |
| Respiratory Virus Unit, Microbiology Services Colindale, Public Health England | Respiratory Virus Unit, Microbiology Services Colindale, Public Health England    | Monica Galiano, Shahjahan Miah, Angie Lackenby, Omolola Akinbami, Tiina Talts, Leena Bhaw, Richard Myers, Steven Platt, Kirstin Edwards, Jonathan Hubb, Joanna Ellis, Maria Zambon |            |  |  |                 |
| EPI_ISL_424300                                                                 | hCoV-19/USA/WA-UW-1879/2020                                                       | North America / USA / Washington                                                                                                                                                   | 2020-03-21 |  |  | UW              |
| Virology Lab                                                                   | UW Virology Lab Pavitra Roychoudhury, Hong Xie, Keith Jerome, Alexander Greninger |                                                                                                                                                                                    |            |  |  |                 |
| EPI_ISL_424301                                                                 | hCoV-19/USA/WA-UW-1948/2020                                                       | North America / USA / Washington                                                                                                                                                   | 2020-03-24 |  |  | UW              |
| Virology Lab                                                                   | UW Virology Lab Pavitra Roychoudhury, Hong Xie, Keith Jerome, Alexander Greninger |                                                                                                                                                                                    |            |  |  |                 |
| EPI_ISL_424302                                                                 | hCoV-19/USA/WA-UW-1878/2020                                                       | North America / USA / Washington                                                                                                                                                   | 2020-03-24 |  |  | UW              |
| Virology Lab                                                                   | UW Virology Lab Pavitra Roychoudhury, Hong Xie, Keith Jerome, Alexander Greninger |                                                                                                                                                                                    |            |  |  |                 |
| EPI_ISL_424304                                                                 | hCoV-19/USA/WA-UW-1930/2020                                                       | North America / USA / Washington                                                                                                                                                   | 2020-03-24 |  |  | UW              |
| Virology Lab                                                                   | UW Virology Lab Pavitra Roychoudhury, Hong Xie, Keith Jerome, Alexander Greninger |                                                                                                                                                                                    |            |  |  |                 |
| EPI_ISL_424305                                                                 | hCoV-19/USA/WA-UW-1877/2020                                                       | North America / USA / Washington                                                                                                                                                   | 2020-03-24 |  |  | UW              |
| Virology Lab                                                                   | UW Virology Lab Pavitra Roychoudhury, Hong Xie, Keith Jerome, Alexander Greninger |                                                                                                                                                                                    |            |  |  |                 |
| EPI_ISL_424306                                                                 | hCoV-19/USA/WA-UW-1874/2020                                                       | North America / USA / Washington                                                                                                                                                   | 2020-03-23 |  |  | UW              |
| Virology Lab                                                                   | UW Virology Lab Pavitra Roychoudhury, Hong Xie, Keith Jerome, Alexander Greninger |                                                                                                                                                                                    |            |  |  |                 |
| EPI_ISL_424307                                                                 | hCoV-19/USA/OR-UW-1885/2020                                                       | North America / USA / Oregon                                                                                                                                                       | 2020-03-23 |  |  | UW Virology Lab |
| UW Virology Lab                                                                | Pavitra Roychoudhury, Hong Xie, Keith Jerome, Alexander Greninger                 |                                                                                                                                                                                    |            |  |  |                 |
| EPI_ISL_424308                                                                 | hCoV-19/USA/OR-UW-1887/2020                                                       | North America / USA / Oregon                                                                                                                                                       | 2020-03-22 |  |  | UW Virology Lab |
| UW Virology Lab                                                                | Pavitra Roychoudhury, Hong Xie, Keith Jerome, Alexander Greninger                 |                                                                                                                                                                                    |            |  |  |                 |
| EPI_ISL_424309                                                                 | hCoV-19/USA/WA-UW-1881/2020                                                       | North America / USA / Washington                                                                                                                                                   | 2020-03-24 |  |  | UW              |
| Virology Lab                                                                   | UW Virology Lab Pavitra Roychoudhury, Hong Xie, Keith Jerome, Alexander Greninger |                                                                                                                                                                                    |            |  |  |                 |
| EPI_ISL_424310                                                                 | hCoV-19/USA/WA-UW-1888/2020                                                       | North America / USA / Washington                                                                                                                                                   | 2020-03-23 |  |  | UW              |
| Virology Lab                                                                   | UW Virology Lab Pavitra Roychoudhury, Hong Xie, Keith Jerome, Alexander Greninger |                                                                                                                                                                                    |            |  |  |                 |
| EPI_ISL_424311                                                                 | hCoV-19/USA/WA-UW-1880/2020                                                       | North America / USA / Washington                                                                                                                                                   | 2020-03-24 |  |  | UW              |
| Virology Lab                                                                   | UW Virology Lab Pavitra Roychoudhury, Hong Xie, Keith Jerome, Alexander Greninger |                                                                                                                                                                                    |            |  |  |                 |
| EPI_ISL_424312                                                                 | hCoV-19/USA/WA-UW-1955/2020                                                       | North America / USA / Washington                                                                                                                                                   | 2020-03-24 |  |  | UW              |
| Virology Lab                                                                   | UW Virology Lab Pavitra Roychoudhury, Hong Xie, Keith Jerome, Alexander Greninger |                                                                                                                                                                                    |            |  |  |                 |
| EPI_ISL_424313                                                                 | hCoV-19/USA/WA-UW-1956/2020                                                       | North America / USA / Washington                                                                                                                                                   | 2020-03-24 |  |  | UW              |
| Virology Lab                                                                   | UW Virology Lab Pavitra Roychoudhury, Hong Xie, Keith Jerome, Alexander Greninger |                                                                                                                                                                                    |            |  |  |                 |
| EPI_ISL_424314                                                                 | hCoV-19/USA/WA-UW-1921/2020                                                       | North America / USA / Washington                                                                                                                                                   | 2020-03-24 |  |  | UW              |
| Virology Lab                                                                   | UW Virology Lab Pavitra Roychoudhury, Hong Xie, Keith Jerome, Alexander Greninger |                                                                                                                                                                                    |            |  |  |                 |
| EPI_ISL_424315                                                                 | hCoV-19/USA/ID-UW-1957/2020                                                       | North America / USA / Idaho                                                                                                                                                        | 2020-03-20 |  |  | UW Virology Lab |
| UW Virology Lab                                                                | Pavitra Roychoudhury, Hong Xie, Keith Jerome, Alexander Greninger                 |                                                                                                                                                                                    |            |  |  |                 |
| EPI_ISL_424316                                                                 | hCoV-19/USA/WA-UW-1890/2020                                                       | North America / USA / Washington                                                                                                                                                   | 2020-03-24 |  |  | UW              |
| Virology Lab                                                                   | UW Virology Lab Pavitra Roychoudhury, Hong Xie, Keith Jerome, Alexander Greninger |                                                                                                                                                                                    |            |  |  |                 |
| EPI_ISL_424317                                                                 | hCoV-19/USA/WA-UW-1928/2020                                                       | North America / USA / Washington                                                                                                                                                   | 2020-03-24 |  |  | UW              |
| Virology Lab                                                                   | UW Virology Lab Pavitra Roychoudhury, Hong Xie, Keith Jerome, Alexander Greninger |                                                                                                                                                                                    |            |  |  |                 |
| EPI_ISL_424318                                                                 | hCoV-19/USA/ID-UW-1938/2020                                                       | North America / USA / Idaho                                                                                                                                                        | 2020-03-22 |  |  | UW Virology Lab |
| UW Virology Lab                                                                | Pavitra Roychoudhury, Hong Xie, Keith Jerome, Alexander Greninger                 |                                                                                                                                                                                    |            |  |  |                 |
| EPI_ISL_424319                                                                 | hCoV-19/USA/ID-UW-1935/2020                                                       | North America / USA / Idaho                                                                                                                                                        | 2020-03-22 |  |  | UW Virology Lab |
| UW Virology Lab                                                                | Pavitra Roychoudhury, Hong Xie, Keith Jerome, Alexander Greninger                 |                                                                                                                                                                                    |            |  |  |                 |
| EPI_ISL_424321                                                                 | hCoV-19/USA/ID-UW-1925/2020                                                       | North America / USA / Idaho                                                                                                                                                        | 2020-03-20 |  |  | UW Virology Lab |
| UW Virology Lab                                                                | Pavitra Roychoudhury, Hong Xie, Keith Jerome, Alexander Greninger                 |                                                                                                                                                                                    |            |  |  |                 |
| EPI_ISL_424322                                                                 | hCoV-19/USA/ID-UW-1934/2020                                                       | North America / USA / Idaho                                                                                                                                                        | 2020-03-20 |  |  | UW Virology Lab |
| UW Virology Lab                                                                | Pavitra Roychoudhury, Hong Xie, Keith Jerome, Alexander Greninger                 |                                                                                                                                                                                    |            |  |  |                 |
| EPI_ISL_424323                                                                 | hCoV-19/USA/WA-UW-1944/2020                                                       | North America / USA / Washington                                                                                                                                                   | 2020-03-24 |  |  | UW              |
| Virology Lab                                                                   | UW Virology Lab Pavitra Roychoudhury, Hong Xie, Keith Jerome, Alexander Greninger |                                                                                                                                                                                    |            |  |  |                 |
| EPI_ISL_424324                                                                 | hCoV-19/USA/WA-UW-1965/2020                                                       | North America / USA / Washington                                                                                                                                                   | 2020-03-24 |  |  | UW              |
| Virology Lab                                                                   | UW Virology Lab Pavitra Roychoudhury, Hong Xie, Keith Jerome, Alexander Greninger |                                                                                                                                                                                    |            |  |  |                 |

|                                                  |                                                                                                                                                                                        |                                          |            |                                                                                                                                                                                                                                                                                                                                                                                                                                                                                                                                                                                                                                                                                                                                                                                                               |
|--------------------------------------------------|----------------------------------------------------------------------------------------------------------------------------------------------------------------------------------------|------------------------------------------|------------|---------------------------------------------------------------------------------------------------------------------------------------------------------------------------------------------------------------------------------------------------------------------------------------------------------------------------------------------------------------------------------------------------------------------------------------------------------------------------------------------------------------------------------------------------------------------------------------------------------------------------------------------------------------------------------------------------------------------------------------------------------------------------------------------------------------|
| EPI_ISL_424325                                   | hCoV-19/USA/WA-UW-1954/2020                                                                                                                                                            | North America / USA / Washington         | 2020-03-24 | UW                                                                                                                                                                                                                                                                                                                                                                                                                                                                                                                                                                                                                                                                                                                                                                                                            |
| Virology Lab                                     | UW Virology Lab Pavitra Roychoudhury, Hong Xie, Keith Jerome, Alexander Greninger                                                                                                      |                                          |            |                                                                                                                                                                                                                                                                                                                                                                                                                                                                                                                                                                                                                                                                                                                                                                                                               |
| EPI_ISL_424326                                   | hCoV-19/USA/WA-UW-1968/2020                                                                                                                                                            | North America / USA / Washington         | 2020-03-20 | UW                                                                                                                                                                                                                                                                                                                                                                                                                                                                                                                                                                                                                                                                                                                                                                                                            |
| Virology Lab                                     | UW Virology Lab Pavitra Roychoudhury, Hong Xie, Keith Jerome, Alexander Greninger                                                                                                      |                                          |            |                                                                                                                                                                                                                                                                                                                                                                                                                                                                                                                                                                                                                                                                                                                                                                                                               |
| EPI_ISL_424327                                   | hCoV-19/USA/WA-UW-1947/2020                                                                                                                                                            | North America / USA / Washington         | 2020-03-23 | UW                                                                                                                                                                                                                                                                                                                                                                                                                                                                                                                                                                                                                                                                                                                                                                                                            |
| Virology Lab                                     | UW Virology Lab Pavitra Roychoudhury, Hong Xie, Keith Jerome, Alexander Greninger                                                                                                      |                                          |            |                                                                                                                                                                                                                                                                                                                                                                                                                                                                                                                                                                                                                                                                                                                                                                                                               |
| EPI_ISL_424329                                   | hCoV-19/USA/WA-UW-1984/2020                                                                                                                                                            | North America / USA / Washington         | 2020-03-24 | UW                                                                                                                                                                                                                                                                                                                                                                                                                                                                                                                                                                                                                                                                                                                                                                                                            |
| Virology Lab                                     | UW Virology Lab Pavitra Roychoudhury, Hong Xie, Keith Jerome, Alexander Greninger                                                                                                      |                                          |            |                                                                                                                                                                                                                                                                                                                                                                                                                                                                                                                                                                                                                                                                                                                                                                                                               |
| EPI_ISL_424330                                   | hCoV-19/USA/WA-UW-1865/2020                                                                                                                                                            | North America / USA / Washington         | 2020-03-23 | UW                                                                                                                                                                                                                                                                                                                                                                                                                                                                                                                                                                                                                                                                                                                                                                                                            |
| Virology Lab                                     | UW Virology Lab Pavitra Roychoudhury, Hong Xie, Keith Jerome, Alexander Greninger                                                                                                      |                                          |            |                                                                                                                                                                                                                                                                                                                                                                                                                                                                                                                                                                                                                                                                                                                                                                                                               |
| EPI_ISL_424331                                   | hCoV-19/USA/WA-UW-1907/2020                                                                                                                                                            | North America / USA / Washington         | 2020-03-22 | UW                                                                                                                                                                                                                                                                                                                                                                                                                                                                                                                                                                                                                                                                                                                                                                                                            |
| Virology Lab                                     | UW Virology Lab Pavitra Roychoudhury, Hong Xie, Keith Jerome, Alexander Greninger                                                                                                      |                                          |            |                                                                                                                                                                                                                                                                                                                                                                                                                                                                                                                                                                                                                                                                                                                                                                                                               |
| EPI_ISL_424332                                   | hCoV-19/USA/WA-UW-1917/2020                                                                                                                                                            | North America / USA / Washington         | 2020-03-22 | UW                                                                                                                                                                                                                                                                                                                                                                                                                                                                                                                                                                                                                                                                                                                                                                                                            |
| Virology Lab                                     | UW Virology Lab Pavitra Roychoudhury, Hong Xie, Keith Jerome, Alexander Greninger                                                                                                      |                                          |            |                                                                                                                                                                                                                                                                                                                                                                                                                                                                                                                                                                                                                                                                                                                                                                                                               |
| EPI_ISL_424333                                   | hCoV-19/USA/WA-UW-2006/2020                                                                                                                                                            | North America / USA / Washington         | 2020-03-24 | UW                                                                                                                                                                                                                                                                                                                                                                                                                                                                                                                                                                                                                                                                                                                                                                                                            |
| Virology Lab                                     | UW Virology Lab Pavitra Roychoudhury, Hong Xie, Keith Jerome, Alexander Greninger                                                                                                      |                                          |            |                                                                                                                                                                                                                                                                                                                                                                                                                                                                                                                                                                                                                                                                                                                                                                                                               |
| EPI_ISL_424334                                   | hCoV-19/USA/WA-UW-1994/2020                                                                                                                                                            | North America / USA / Washington         | 2020-03-24 | UW                                                                                                                                                                                                                                                                                                                                                                                                                                                                                                                                                                                                                                                                                                                                                                                                            |
| Virology Lab                                     | UW Virology Lab Pavitra Roychoudhury, Hong Xie, Keith Jerome, Alexander Greninger                                                                                                      |                                          |            |                                                                                                                                                                                                                                                                                                                                                                                                                                                                                                                                                                                                                                                                                                                                                                                                               |
| EPI_ISL_424335                                   | hCoV-19/USA/WA-UW-1998/2020                                                                                                                                                            | North America / USA / Washington         | 2020-03-24 | UW                                                                                                                                                                                                                                                                                                                                                                                                                                                                                                                                                                                                                                                                                                                                                                                                            |
| Virology Lab                                     | UW Virology Lab Pavitra Roychoudhury, Hong Xie, Keith Jerome, Alexander Greninger                                                                                                      |                                          |            |                                                                                                                                                                                                                                                                                                                                                                                                                                                                                                                                                                                                                                                                                                                                                                                                               |
| EPI_ISL_424336                                   | hCoV-19/USA/WA-UW-1988/2020                                                                                                                                                            | North America / USA / Washington         | 2020-03-24 | UW                                                                                                                                                                                                                                                                                                                                                                                                                                                                                                                                                                                                                                                                                                                                                                                                            |
| Virology Lab                                     | UW Virology Lab Pavitra Roychoudhury, Hong Xie, Keith Jerome, Alexander Greninger                                                                                                      |                                          |            |                                                                                                                                                                                                                                                                                                                                                                                                                                                                                                                                                                                                                                                                                                                                                                                                               |
| EPI_ISL_424337                                   | hCoV-19/USA/WA-UW-1977/2020                                                                                                                                                            | North America / USA / Washington         | 2020-03-24 | UW                                                                                                                                                                                                                                                                                                                                                                                                                                                                                                                                                                                                                                                                                                                                                                                                            |
| Virology Lab                                     | UW Virology Lab Pavitra Roychoudhury, Hong Xie, Keith Jerome, Alexander Greninger                                                                                                      |                                          |            |                                                                                                                                                                                                                                                                                                                                                                                                                                                                                                                                                                                                                                                                                                                                                                                                               |
| EPI_ISL_424338                                   | hCoV-19/USA/WA-UW-1986/2020                                                                                                                                                            | North America / USA / Washington         | 2020-03-24 | UW                                                                                                                                                                                                                                                                                                                                                                                                                                                                                                                                                                                                                                                                                                                                                                                                            |
| Virology Lab                                     | UW Virology Lab Pavitra Roychoudhury, Hong Xie, Keith Jerome, Alexander Greninger                                                                                                      |                                          |            |                                                                                                                                                                                                                                                                                                                                                                                                                                                                                                                                                                                                                                                                                                                                                                                                               |
| EPI_ISL_424339                                   | hCoV-19/USA/WA-UW-2016/2020                                                                                                                                                            | North America / USA / Washington         | 2020-03-24 | UW                                                                                                                                                                                                                                                                                                                                                                                                                                                                                                                                                                                                                                                                                                                                                                                                            |
| Virology Lab                                     | UW Virology Lab Pavitra Roychoudhury, Hong Xie, Keith Jerome, Alexander Greninger                                                                                                      |                                          |            |                                                                                                                                                                                                                                                                                                                                                                                                                                                                                                                                                                                                                                                                                                                                                                                                               |
| EPI_ISL_424340                                   | hCoV-19/USA/WA-UW-2009/2020                                                                                                                                                            | North America / USA / Washington         | 2020-03-24 | UW                                                                                                                                                                                                                                                                                                                                                                                                                                                                                                                                                                                                                                                                                                                                                                                                            |
| Virology Lab                                     | UW Virology Lab Pavitra Roychoudhury, Hong Xie, Keith Jerome, Alexander Greninger                                                                                                      |                                          |            |                                                                                                                                                                                                                                                                                                                                                                                                                                                                                                                                                                                                                                                                                                                                                                                                               |
| EPI_ISL_424341                                   | hCoV-19/USA/WA-UW-2008/2020                                                                                                                                                            | North America / USA / Washington         | 2020-03-24 | UW                                                                                                                                                                                                                                                                                                                                                                                                                                                                                                                                                                                                                                                                                                                                                                                                            |
| Virology Lab                                     | UW Virology Lab Pavitra Roychoudhury, Hong Xie, Keith Jerome, Alexander Greninger                                                                                                      |                                          |            |                                                                                                                                                                                                                                                                                                                                                                                                                                                                                                                                                                                                                                                                                                                                                                                                               |
| EPI_ISL_424342                                   | hCoV-19/Italy/INMI8/2020                                                                                                                                                               | Europe / Italy / Rome                    | 2020-03-07 | INMI Lazzaro                                                                                                                                                                                                                                                                                                                                                                                                                                                                                                                                                                                                                                                                                                                                                                                                  |
| Spallanzani IRCCS                                | Laboratory of Virology, INMI Lazzaro Spallanzani IRCCS                                                                                                                                 |                                          |            | Concetta Castilletti, Barbara Bartolini, Martina Rueca, Cesare Ernesto Maria Gruber, Francesco Messina, Fabrizio Carletti, Eleonora Lalle, Licia Bordi, Giulia Matusali, Francesca Colavita, Maria Rosaria Capobianchi, Francesco Vairo, Giuseppe Ippolito, Antonino Di Caro                                                                                                                                                                                                                                                                                                                                                                                                                                                                                                                                  |
| EPI_ISL_424343                                   | hCoV-19/Italy/INMI9/2020                                                                                                                                                               | Europe / Italy / Rome                    | 2020-03-23 | INMI Lazzaro                                                                                                                                                                                                                                                                                                                                                                                                                                                                                                                                                                                                                                                                                                                                                                                                  |
| Spallanzani IRCCS                                | Laboratory of Virology, INMI Lazzaro Spallanzani IRCCS                                                                                                                                 |                                          |            | Fabrizio Carletti, Barbara Bartolini, Martina Rueca, Cesare Ernesto Maria Gruber, Francesco Messina, Eleonora Lalle, Licia Bordi, Giulia Matusali, Francesca Colavita, Maria Rosaria Capobianchi, Concetta Castilletti, Francesco Vairo, Giuseppe Ippolito, Antonino Di Caro                                                                                                                                                                                                                                                                                                                                                                                                                                                                                                                                  |
| EPI_ISL_424344                                   | hCoV-19/Italy/INMI10/2020                                                                                                                                                              | Europe / Italy / Rome                    | 2020-03-04 | INMI Lazzaro                                                                                                                                                                                                                                                                                                                                                                                                                                                                                                                                                                                                                                                                                                                                                                                                  |
| Spallanzani IRCCS                                | Laboratory of Virology, INMI Lazzaro Spallanzani IRCCS                                                                                                                                 |                                          |            | Eleonora Lalle, Barbara Bartolini, Martina Rueca, Cesare Ernesto Maria Gruber, Francesco Messina, Fabrizio Carletti, Licia Bordi, Giulia Matusali, Francesca Colavita, Maria Rosaria Capobianchi, Concetta Castilletti, Francesco Vairo, Giuseppe Ippolito, Antonino Di Caro                                                                                                                                                                                                                                                                                                                                                                                                                                                                                                                                  |
| EPI_ISL_424345                                   | hCoV-19/Mexico/CDMX-INNER_01/2020                                                                                                                                                      | North America / Mexico / Mexico City     | 2020-03-12 |                                                                                                                                                                                                                                                                                                                                                                                                                                                                                                                                                                                                                                                                                                                                                                                                               |
| Instituto Nacional de Enfermedades Respiratorias | Instituto Nacional de Enfermedades Respiratorias                                                                                                                                       |                                          |            | Joel Armando Vázquez Pérez, Celia Boukadida, Santiago Avila Ríos, Mario Mújica Sánchez, José Arturo Martínez Orozco, Eduardo Becerril Vargas, Jorge Salas Hernández, Irma López Martínez, Lucia Hernández Rivas, Gisela Barrera Badillo, Edgar Mendieta Condado, Fabiola Garcés Ayala, Adnan Araiza Rodríguez, José Ernesto Ramírez González, Victor Hugo Borja Aburto, Concepción Grajales Muñiz, Cesar Raúl González Bonilla, Carolina González Torres, Francisco Javier Gaytán Cervantes, José Esteban Muñoz Medina, Guillermo M. Ruiz-Palacios, Pilar Ramos Cervantes, Violeta Ibarra Gonzalez, Fernando Ledesma Barrientos, Luis Alberto García Andrade, Alfredo Ponce de León Garduño, Blanca Taboada, Alejandro Sánchez, Pavel Isa, Ricardo Grande, Gloria Vázquez, Francisco Pulido, Carlos F. Arias. |
| EPI_ISL_424346                                   | hCoV-19/USA/AK-PHL037/2020                                                                                                                                                             | North America / USA / Alaska / Southeast | 2020-03-21 |                                                                                                                                                                                                                                                                                                                                                                                                                                                                                                                                                                                                                                                                                                                                                                                                               |
| Alaska State Virology Laboratory                 | Alaska State Virology Laboratory                                                                                                                                                       |                                          |            | Chen, J.                                                                                                                                                                                                                                                                                                                                                                                                                                                                                                                                                                                                                                                                                                                                                                                                      |
| EPI_ISL_424347                                   | hCoV-19/USA/AK-PHL077/2020                                                                                                                                                             | North America / USA / Alaska / Interior  | 2020-03-29 | Alaska                                                                                                                                                                                                                                                                                                                                                                                                                                                                                                                                                                                                                                                                                                                                                                                                        |
| State Virology Laboratory                        | Alaska State Virology Laboratory                                                                                                                                                       |                                          |            | Chen, J.                                                                                                                                                                                                                                                                                                                                                                                                                                                                                                                                                                                                                                                                                                                                                                                                      |
| EPI_ISL_424352                                   | hCoV-19/Fuyang/FY002/2020                                                                                                                                                              | Asia / China / Anhui / Fuyang            | 2020-03-10 | unknown                                                                                                                                                                                                                                                                                                                                                                                                                                                                                                                                                                                                                                                                                                                                                                                                       |
| Clinical Laboratory                              | Ge,B.                                                                                                                                                                                  |                                          |            |                                                                                                                                                                                                                                                                                                                                                                                                                                                                                                                                                                                                                                                                                                                                                                                                               |
| EPI_ISL_424353                                   | hCoV-19/USA/NC_200173/2020                                                                                                                                                             | North America / USA / North Carolina     | 2020-03    | Dirk Dittmer                                                                                                                                                                                                                                                                                                                                                                                                                                                                                                                                                                                                                                                                                                                                                                                                  |
| Dirk Dittmer                                     | Bailey,A.G., Caro-Vegas,C., Thompson,C., Dittmer,D., Eason,A.B., Juarez,A., Landis,J.T., McNamara,R.P., Miller,M.B., Moorad,R., Pluta,L.J., Seltzer,T.A., Villamor,F. and Vahrson,W.   |                                          |            |                                                                                                                                                                                                                                                                                                                                                                                                                                                                                                                                                                                                                                                                                                                                                                                                               |
| EPI_ISL_424354                                   | hCoV-19/USA/NC_200189/2020                                                                                                                                                             | North America / USA / North Carolina     | 2020-03    | Dirk Dittmer                                                                                                                                                                                                                                                                                                                                                                                                                                                                                                                                                                                                                                                                                                                                                                                                  |
| Dirk Dittmer                                     | Bailey,A.G., Caro-Vegas,C.P., Dittmer,D., Eason,A.B., Juarez,A., Landis,J.T., McNamara,R.P., Miller,M.B., Moorad,R., Pluta,L.J., Seltzer,T.A., Thompson,C., Vahrson,W. and Villamor,F. |                                          |            |                                                                                                                                                                                                                                                                                                                                                                                                                                                                                                                                                                                                                                                                                                                                                                                                               |
| EPI_ISL_424355                                   | hCoV-19/Beijing/Wuhan_IME-BJ01/2020                                                                                                                                                    | Asia / China / Beijing                   | 2020-01-24 | unknown Beijing                                                                                                                                                                                                                                                                                                                                                                                                                                                                                                                                                                                                                                                                                                                                                                                               |

|                                                                  |                                                                                                                                                                                                                                                                                                                                                                                                                                                                                                                                                                                                                                                                                                                                                                                                            |                              |            |         |                                                                                                |
|------------------------------------------------------------------|------------------------------------------------------------------------------------------------------------------------------------------------------------------------------------------------------------------------------------------------------------------------------------------------------------------------------------------------------------------------------------------------------------------------------------------------------------------------------------------------------------------------------------------------------------------------------------------------------------------------------------------------------------------------------------------------------------------------------------------------------------------------------------------------------------|------------------------------|------------|---------|------------------------------------------------------------------------------------------------|
| Institute of Microbiology and Epidemiology                       | Fan,H., Qin,E., Wu,Y., Guo,Y., Zhang,X., Yong,Y., Hou,J., Xu,Z., Mu,J., Teng,Y., Mi,Z., Yang,R., Song,Y., Li,B. and Cui,Y.                                                                                                                                                                                                                                                                                                                                                                                                                                                                                                                                                                                                                                                                                 |                              |            |         |                                                                                                |
| EPI_ISL_424356                                                   | hCoV-19/Beijing/Wuhan_IME-BJ02/2020                                                                                                                                                                                                                                                                                                                                                                                                                                                                                                                                                                                                                                                                                                                                                                        | Asia / China / Beijing       | 2020-01-25 | unknown | Beijing                                                                                        |
| Institute of Microbiology and Epidemiology                       | Fan,H., Qin,E., Wu,Y., Guo,Y., Zhang,X., Yong,Y., Hou,J., Xu,Z., Mu,J., Teng,Y., Mi,Z., Yang,R., Song,Y., Li,B. and Cui,Y.                                                                                                                                                                                                                                                                                                                                                                                                                                                                                                                                                                                                                                                                                 |                              |            |         |                                                                                                |
| EPI_ISL_424357                                                   | hCoV-19/Beijing/Wuhan_IME-BJ03/2020                                                                                                                                                                                                                                                                                                                                                                                                                                                                                                                                                                                                                                                                                                                                                                        | Asia / China / Beijing       | 2020-01-28 | unknown | Beijing                                                                                        |
| Institute of Microbiology and Epidemiology                       | Fan,H., Qin,E., Wu,Y., Guo,Y., Zhang,X., Yong,Y., Hou,J., Xu,Z., Mu,J., Teng,Y., Mi,Z., Yang,R., Song,Y., Li,B. and Cui,Y.                                                                                                                                                                                                                                                                                                                                                                                                                                                                                                                                                                                                                                                                                 |                              |            |         |                                                                                                |
| EPI_ISL_424358                                                   | hCoV-19/Beijing/Wuhan_IME-BJ04/2020                                                                                                                                                                                                                                                                                                                                                                                                                                                                                                                                                                                                                                                                                                                                                                        | Asia / China / Beijing       | 2020-01-28 | unknown | Beijing                                                                                        |
| Institute of Microbiology and Epidemiology                       | Fan,H., Qin,E., Wu,Y., Guo,Y., Zhang,X., Yong,Y., Hou,J., Xu,Z., Mu,J., Teng,Y., Mi,Z., Yang,R., Song,Y., Li,B. and Cui,Y.                                                                                                                                                                                                                                                                                                                                                                                                                                                                                                                                                                                                                                                                                 |                              |            |         |                                                                                                |
| EPI_ISL_424359                                                   | hCoV-19/Beijing/Wuhan_IME-BJ05/2020                                                                                                                                                                                                                                                                                                                                                                                                                                                                                                                                                                                                                                                                                                                                                                        | Asia / China / Beijing       | 2020-01-27 | unknown | Beijing                                                                                        |
| Institute of Microbiology and Epidemiology                       | Fan,H., Qin,E., Wu,Y., Guo,Y., Zhang,X., Yong,Y., Hou,J., Xu,Z., Mu,J., Teng,Y., Mi,Z., Yang,R., Song,Y., Li,B. and Cui,Y.                                                                                                                                                                                                                                                                                                                                                                                                                                                                                                                                                                                                                                                                                 |                              |            |         |                                                                                                |
| EPI_ISL_424360                                                   | hCoV-19/Beijing/Wuhan_IME-BJ07/2020                                                                                                                                                                                                                                                                                                                                                                                                                                                                                                                                                                                                                                                                                                                                                                        | Asia / China / Beijing       | 2020-01-29 | unknown | Beijing                                                                                        |
| Institute of Microbiology and Epidemiology                       | Fan,H., Qin,E., Wu,Y., Guo,Y., Zhang,X., Yong,Y., Hou,J., Xu,Z., Mu,J., Teng,Y., Mi,Z., Yang,R., Song,Y., Li,B. and Cui,Y.                                                                                                                                                                                                                                                                                                                                                                                                                                                                                                                                                                                                                                                                                 |                              |            |         |                                                                                                |
| EPI_ISL_424361                                                   | hCoV-19/India/1063/2020                                                                                                                                                                                                                                                                                                                                                                                                                                                                                                                                                                                                                                                                                                                                                                                    | Asia / India                 | 2020-03-10 |         | National Influenza Center, Indian Council of Medical Research - National Institute of Virology |
| Institute of Virology, Microbial Containment Complex             | Pragya D. Yadav, Varsha Potdar, Savita Patil, Dimpal A. Nyayanit, Triparna Majumdar, Manohar. L. Chaudhary, Gururaj Deshpande, Padinjaremmattathil Thankappan Ullas, Anita Shete-Aich, Hitesh Dighe, Sreelekshmy Mohandas, Gajanan Sapkal, Atanu Basu, Amita Jain, Bharti Malhotra, Deepika Chaudhary, Sarah Cherian, Priya Abraham                                                                                                                                                                                                                                                                                                                                                                                                                                                                        |                              |            |         |                                                                                                |
| EPI_ISL_424362                                                   | hCoV-19/India/1135/2020                                                                                                                                                                                                                                                                                                                                                                                                                                                                                                                                                                                                                                                                                                                                                                                    | Asia / India                 | 2020-03-10 |         | National Influenza Center, Indian Council of Medical Research - National Institute of Virology |
| Institute of Virology, Microbial Containment Complex             | Pragya D. Yadav, Varsha Potdar, Savita Patil, Dimpal A. Nyayanit, Triparna Majumdar, Manohar. L. Chaudhary, Gururaj Deshpande, Padinjaremmattathil Thankappan Ullas, Anita Shete-Aich, Hitesh Dighe, Sreelekshmy Mohandas, Gajanan Sapkal, Atanu Basu, Amita Jain, Bharti Malhotra, Deepika Chaudhary, Sarah Cherian, Priya Abraham                                                                                                                                                                                                                                                                                                                                                                                                                                                                        |                              |            |         |                                                                                                |
| EPI_ISL_424363                                                   | hCoV-19/India/1652/2020                                                                                                                                                                                                                                                                                                                                                                                                                                                                                                                                                                                                                                                                                                                                                                                    | Asia / India                 | 2020-03-12 |         | National Influenza Center, Indian Council of Medical Research - National Institute of Virology |
| Institute of Virology, Microbial Containment Complex             | Pragya D. Yadav, Varsha Potdar, Savita Patil, Dimpal A. Nyayanit, Triparna Majumdar, Manohar. L. Chaudhary, Gururaj Deshpande, Padinjaremmattathil Thankappan Ullas, Anita Shete-Aich, Hitesh Dighe, Sreelekshmy Mohandas, Gajanan Sapkal, Atanu Basu, Amita Jain, Bharti Malhotra, Deepika Chaudhary, Sarah Cherian, Priya Abraham                                                                                                                                                                                                                                                                                                                                                                                                                                                                        |                              |            |         |                                                                                                |
| EPI_ISL_424364                                                   | hCoV-19/India/3118/2020                                                                                                                                                                                                                                                                                                                                                                                                                                                                                                                                                                                                                                                                                                                                                                                    | Asia / India                 | 2020-03-17 |         | National Influenza Center, Indian Council of Medical Research - National Institute of Virology |
| Institute of Virology, Microbial Containment Complex             | Pragya D. Yadav, Varsha Potdar, Savita Patil, Dimpal A. Nyayanit, Triparna Majumdar, Manohar. L. Chaudhary, Gururaj Deshpande, Padinjaremmattathil Thankappan Ullas, Anita Shete-Aich, Hitesh Dighe, Sreelekshmy Mohandas, Gajanan Sapkal, Atanu Basu, Amita Jain, Bharti Malhotra, Deepika Chaudhary, Sarah Cherian, Priya Abraham                                                                                                                                                                                                                                                                                                                                                                                                                                                                        |                              |            |         |                                                                                                |
| EPI_ISL_424365                                                   | hCoV-19/India/3239/2020                                                                                                                                                                                                                                                                                                                                                                                                                                                                                                                                                                                                                                                                                                                                                                                    | Asia / India                 | 2020-03-17 |         | National Influenza Center, Indian Council of Medical Research - National Institute of Virology |
| Institute of Virology, Microbial Containment Complex             | Pragya D. Yadav, Varsha Potdar, Savita Patil, Dimpal A. Nyayanit, Triparna Majumdar, Manohar. L. Chaudhary, Gururaj Deshpande, Padinjaremmattathil Thankappan Ullas, Anita Shete-Aich, Hitesh Dighe, Sreelekshmy Mohandas, Gajanan Sapkal, Atanu Basu, Amita Jain, Bharti Malhotra, Deepika Chaudhary, Sarah Cherian, Priya Abraham                                                                                                                                                                                                                                                                                                                                                                                                                                                                        |                              |            |         |                                                                                                |
| EPI_ISL_424366                                                   | hCoV-19/Turkey/ERAGEM-001/2020                                                                                                                                                                                                                                                                                                                                                                                                                                                                                                                                                                                                                                                                                                                                                                             | Europe / Turkey / Kayseri    | 2020-03-17 |         | Vaccine Research, Development and Application Center, Erciyes University                       |
| Research, Development and Application Center, Erciyes University | Gen Era Diagnostics Inc. Shaikh Terkis Islam Pavel, Hazel Yetiskin, Gunsu Aydin, Can Holyavkin, Muhammet Ali Uygut, Zehra B Dursun, İlhami Celik, Alper Iseri, Aykut Ozdarendeli                                                                                                                                                                                                                                                                                                                                                                                                                                                                                                                                                                                                                           |                              |            |         |                                                                                                |
| EPI_ISL_424367                                                   | hCoV-19/Iceland/343/2020                                                                                                                                                                                                                                                                                                                                                                                                                                                                                                                                                                                                                                                                                                                                                                                   | Europe / Iceland / Reykjavik | 2020-03    |         | The National University Hospital of Iceland                                                    |
| Hospital of Iceland                                              | deCODE genetics Daniel F Gudbjartsson; Agnar Helgason; Hakon Jonsson; Olafur T Magnusson; Pall Melsted; Gudmundur L Norddahl; Jona Saemundsdottir; Asgeir Sigurdsson; Patrick Sulem; Arna B Agustsdottir; Berglind Eiriksdottir; Run Fridriksdottir; Elisabet E Gardarsdottir; Gudmundur Georgsson; Olafia S Gretarsdottir; Kjartan R Gudmundsson; Thora R Gunnarsdottir; Arnaldur Gylfason; Hilma Holm; Brynjar O Jensson; Aslaug Jonasdottir; Kamilla S Josefsdottir; Thordur Kristjansson; Droplaug N Magnusdottir; Louise le Roux; Gudrun Sigmundsdottir; Gardar Sveinbjornsson; Kristin E Sveinsdottir; Maney Sveinsdottir; Emil A Thorarensen; Bjarni Thorbjornsson; Gisli Masson; Ingileif Jonsdottir; Alma Moller; Thorolfur Gudnason; Karl G Kristinsson; Unnur Thorsteinsdottir; Kari Stefansson |                              |            |         |                                                                                                |
| EPI_ISL_424368                                                   | hCoV-19/Iceland/344/2020                                                                                                                                                                                                                                                                                                                                                                                                                                                                                                                                                                                                                                                                                                                                                                                   | Europe / Iceland / Reykjavik | 2020-03    |         | The National University Hospital of Iceland                                                    |
| Hospital of Iceland                                              | deCODE genetics Daniel F Gudbjartsson; Agnar Helgason; Hakon Jonsson; Olafur T Magnusson; Pall Melsted; Gudmundur L Norddahl; Jona Saemundsdottir; Asgeir Sigurdsson; Patrick Sulem; Arna B Agustsdottir; Berglind Eiriksdottir; Run Fridriksdottir; Elisabet E Gardarsdottir; Gudmundur Georgsson; Olafia S Gretarsdottir; Kjartan R Gudmundsson; Thora R Gunnarsdottir; Arnaldur Gylfason; Hilma Holm; Brynjar O Jensson; Aslaug Jonasdottir; Kamilla S Josefsdottir; Thordur Kristjansson; Droplaug N Magnusdottir; Louise le Roux; Gudrun Sigmundsdottir; Gardar Sveinbjornsson; Kristin E Sveinsdottir; Maney Sveinsdottir; Emil A Thorarensen; Bjarni Thorbjornsson; Gisli Masson; Ingileif Jonsdottir; Alma Moller; Thorolfur Gudnason; Karl G Kristinsson; Unnur Thorsteinsdottir; Kari Stefansson |                              |            |         |                                                                                                |
| EPI_ISL_424369                                                   | hCoV-19/Iceland/345/2020                                                                                                                                                                                                                                                                                                                                                                                                                                                                                                                                                                                                                                                                                                                                                                                   | Europe / Iceland / Reykjavik | 2020-03    |         | The National University Hospital of Iceland                                                    |





Roux; Gudrun Sigmundsdottir; Gardar Sveinbjornsson; Kristin E Sveinsdottir; Maney Sveinsdottir; Emil A Thorarensen; Bjarni Thorbjornsson; Gisli Masson; Ingileif Jonsdottir; Alma Moller; Thorolfur Gudnason; Karl G Kristinsson; Unnur Thorsteinsdottir; Kari Stefansson

EPI\_ISL\_424393 hCoV-19/Iceland/369/2020 Europe / Iceland / Reykjavik 2020-03-19 The National University Hospital of Iceland deCODE genetics Daniel F Gudbjartsson; Agnar Helgason; Hakon Jonsson; Olafur T Magnusson; Pall Melsted; Gudmundur L Norddahl; Jona Saemundsdottir; Asgeir Sigurdsson; Patrick Sulem; Arna B Agustsdottir; Berglind Eiriksdottir; Run Fridriksdottir; Elisabet E Gardarsdottir; Gudmundur Georgsson; Olafia S Gretarsdottir; Kjartan R Gudmundsson; Thora R Gunnarsdottir; Arnaldur Gylfason; Hilma Holm; Brynjar O Jenson; Aslaug Jonasdottir; Kamilla S Josefsdottir; Thordur Kristjansson; Droplaug N Magnusdottir; Louise le Roux; Gudrun Sigmundsdottir; Gardar Sveinbjornsson; Kristin E Sveinsdottir; Maney Sveinsdottir; Emil A Thorarensen; Bjarni Thorbjornsson; Gisli Masson; Ingileif Jonsdottir; Alma Moller; Thorolfur Gudnason; Karl G Kristinsson; Unnur Thorsteinsdottir; Kari Stefansson

EPI\_ISL\_424394 hCoV-19/Iceland/370/2020 Europe / Iceland / Reykjavik 2020-03-19 The National University Hospital of Iceland deCODE genetics Daniel F Gudbjartsson; Agnar Helgason; Hakon Jonsson; Olafur T Magnusson; Pall Melsted; Gudmundur L Norddahl; Jona Saemundsdottir; Asgeir Sigurdsson; Patrick Sulem; Arna B Agustsdottir; Berglind Eiriksdottir; Run Fridriksdottir; Elisabet E Gardarsdottir; Gudmundur Georgsson; Olafia S Gretarsdottir; Kjartan R Gudmundsson; Thora R Gunnarsdottir; Arnaldur Gylfason; Hilma Holm; Brynjar O Jenson; Aslaug Jonasdottir; Kamilla S Josefsdottir; Thordur Kristjansson; Droplaug N Magnusdottir; Louise le Roux; Gudrun Sigmundsdottir; Gardar Sveinbjornsson; Kristin E Sveinsdottir; Maney Sveinsdottir; Emil A Thorarensen; Bjarni Thorbjornsson; Gisli Masson; Ingileif Jonsdottir; Alma Moller; Thorolfur Gudnason; Karl G Kristinsson; Unnur Thorsteinsdottir; Kari Stefansson

EPI\_ISL\_424396 hCoV-19/Iceland/372/2020 Europe / Iceland / Reykjavik 2020-03-19 The National University Hospital of Iceland deCODE genetics Daniel F Gudbjartsson; Agnar Helgason; Hakon Jonsson; Olafur T Magnusson; Pall Melsted; Gudmundur L Norddahl; Jona Saemundsdottir; Asgeir Sigurdsson; Patrick Sulem; Arna B Agustsdottir; Berglind Eiriksdottir; Run Fridriksdottir; Elisabet E Gardarsdottir; Gudmundur Georgsson; Olafia S Gretarsdottir; Kjartan R Gudmundsson; Thora R Gunnarsdottir; Arnaldur Gylfason; Hilma Holm; Brynjar O Jenson; Aslaug Jonasdottir; Kamilla S Josefsdottir; Thordur Kristjansson; Droplaug N Magnusdottir; Louise le Roux; Gudrun Sigmundsdottir; Gardar Sveinbjornsson; Kristin E Sveinsdottir; Maney Sveinsdottir; Emil A Thorarensen; Bjarni Thorbjornsson; Gisli Masson; Ingileif Jonsdottir; Alma Moller; Thorolfur Gudnason; Karl G Kristinsson; Unnur Thorsteinsdottir; Kari Stefansson

EPI\_ISL\_424398 hCoV-19/Iceland/374/2020 Europe / Iceland / Reykjavik 2020-03-19 The National University Hospital of Iceland deCODE genetics Daniel F Gudbjartsson; Agnar Helgason; Hakon Jonsson; Olafur T Magnusson; Pall Melsted; Gudmundur L Norddahl; Jona Saemundsdottir; Asgeir Sigurdsson; Patrick Sulem; Arna B Agustsdottir; Berglind Eiriksdottir; Run Fridriksdottir; Elisabet E Gardarsdottir; Gudmundur Georgsson; Olafia S Gretarsdottir; Kjartan R Gudmundsson; Thora R Gunnarsdottir; Arnaldur Gylfason; Hilma Holm; Brynjar O Jenson; Aslaug Jonasdottir; Kamilla S Josefsdottir; Thordur Kristjansson; Droplaug N Magnusdottir; Louise le Roux; Gudrun Sigmundsdottir; Gardar Sveinbjornsson; Kristin E Sveinsdottir; Maney Sveinsdottir; Emil A Thorarensen; Bjarni Thorbjornsson; Gisli Masson; Ingileif Jonsdottir; Alma Moller; Thorolfur Gudnason; Karl G Kristinsson; Unnur Thorsteinsdottir; Kari Stefansson

EPI\_ISL\_424399 hCoV-19/Iceland/375/2020 Europe / Iceland / Reykjavik 2020-03-19 The National University Hospital of Iceland deCODE genetics Daniel F Gudbjartsson; Agnar Helgason; Hakon Jonsson; Olafur T Magnusson; Pall Melsted; Gudmundur L Norddahl; Jona Saemundsdottir; Asgeir Sigurdsson; Patrick Sulem; Arna B Agustsdottir; Berglind Eiriksdottir; Run Fridriksdottir; Elisabet E Gardarsdottir; Gudmundur Georgsson; Olafia S Gretarsdottir; Kjartan R Gudmundsson; Thora R Gunnarsdottir; Arnaldur Gylfason; Hilma Holm; Brynjar O Jenson; Aslaug Jonasdottir; Kamilla S Josefsdottir; Thordur Kristjansson; Droplaug N Magnusdottir; Louise le Roux; Gudrun Sigmundsdottir; Gardar Sveinbjornsson; Kristin E Sveinsdottir; Maney Sveinsdottir; Emil A Thorarensen; Bjarni Thorbjornsson; Gisli Masson; Ingileif Jonsdottir; Alma Moller; Thorolfur Gudnason; Karl G Kristinsson; Unnur Thorsteinsdottir; Kari Stefansson

EPI\_ISL\_425308 hCoV-19/England/CAMB-74580/2020 Europe / United Kingdom / England 2020-03-28 Department of Pathology, University of Cambridge COVID-19 Genomics UK (COG-UK) Consortium Luke W Meredith, M. Estee Torok , Myra Hosmillo, William L. Hamilton, Martin D. Curran, Theresa Feltwell, Anna Yakovleva, Charlotte J. Houldcroft, Aminu S. Jahun, Sarah L. Caddy, Ian Goodfellow

EPI\_ISL\_425309 hCoV-19/England/CAMB-7459F/2020 Europe / United Kingdom / England 2020-03-30 Department of Pathology, University of Cambridge COVID-19 Genomics UK (COG-UK) Consortium Luke W Meredith, M. Estee Torok , Myra Hosmillo, William L. Hamilton, Martin D. Curran, Theresa Feltwell, Anna Yakovleva, Charlotte J. Houldcroft, Aminu S. Jahun, Sarah L. Caddy, Ian Goodfellow

EPI\_ISL\_425310 hCoV-19/England/CAMB-745AE/2020 Europe / United Kingdom / England 2020-03-27 Department of Pathology, University of Cambridge COVID-19 Genomics UK (COG-UK) Consortium Luke W Meredith, M. Estee Torok , Myra Hosmillo, William L. Hamilton, Martin D. Curran, Theresa Feltwell, Anna Yakovleva, Charlotte J. Houldcroft, Aminu S. Jahun, Sarah L. Caddy, Ian Goodfellow

EPI\_ISL\_425311 hCoV-19/England/CAMB-745BD/2020 Europe / United Kingdom / England 2020-03-27 Department of Pathology, University of Cambridge COVID-19 Genomics UK (COG-UK) Consortium Luke W Meredith, M. Estee Torok , Myra Hosmillo, William L. Hamilton, Martin D. Curran, Theresa Feltwell, Anna Yakovleva, Charlotte J. Houldcroft, Aminu S. Jahun, Sarah L. Caddy, Ian Goodfellow

EPI\_ISL\_425312 hCoV-19/England/CAMB-745CC/2020 Europe / United Kingdom / England 2020-03-29 Department of Pathology, University of Cambridge COVID-19 Genomics UK (COG-UK) Consortium Luke W Meredith, M. Estee Torok , Myra Hosmillo, William L. Hamilton, Martin D. Curran, Theresa Feltwell, Anna Yakovleva, Charlotte J. Houldcroft, Aminu S. Jahun, Sarah L. Caddy, Ian Goodfellow

EPI\_ISL\_425313 hCoV-19/England/CAMB-745DB/2020 Europe / United Kingdom / England 2020-03-28 Department of Pathology, University of Cambridge COVID-19 Genomics UK (COG-UK) Consortium Luke W



|                                                                                                                                                                                                                                                     |                                  |                                   |            |
|-----------------------------------------------------------------------------------------------------------------------------------------------------------------------------------------------------------------------------------------------------|----------------------------------|-----------------------------------|------------|
| EPI_ISL_425359                                                                                                                                                                                                                                      | hCoV-19/England/CAMB-74C30/2020  | Europe / United Kingdom / England | 2020-03-17 |
| Department of Pathology, University of Cambridge COVID-19 Genomics UK (COG-UK) Consortium Luke W                                                                                                                                                    |                                  |                                   |            |
| Meredith, M. Estee Torok , Myra Hosmillo, William L. Hamilton, Martin D. Curran, Theresa Feltwell, Anna Yakovleva, Charlotte J. Houldcroft, Aminu S. Jahun, Sarah L. Caddy, Ian Goodfellow                                                          |                                  |                                   |            |
| EPI_ISL_425361                                                                                                                                                                                                                                      | hCoV-19/England/CAMB-74C5E/2020  | Europe / United Kingdom / England | 2020-03-19 |
| Department of Pathology, University of Cambridge COVID-19 Genomics UK (COG-UK) Consortium Luke W                                                                                                                                                    |                                  |                                   |            |
| Meredith, M. Estee Torok , Myra Hosmillo, William L. Hamilton, Martin D. Curran, Theresa Feltwell, Anna Yakovleva, Charlotte J. Houldcroft, Aminu S. Jahun, Sarah L. Caddy, Ian Goodfellow                                                          |                                  |                                   |            |
| EPI_ISL_425362                                                                                                                                                                                                                                      | hCoV-19/England/CAMB-74C8B/2020  | Europe / United Kingdom / England | 2020-03-17 |
| Department of Pathology, University of Cambridge COVID-19 Genomics UK (COG-UK) Consortium Luke W                                                                                                                                                    |                                  |                                   |            |
| Meredith, M. Estee Torok , Myra Hosmillo, William L. Hamilton, Martin D. Curran, Theresa Feltwell, Anna Yakovleva, Charlotte J. Houldcroft, Aminu S. Jahun, Sarah L. Caddy, Ian Goodfellow                                                          |                                  |                                   |            |
| EPI_ISL_425371                                                                                                                                                                                                                                      | hCoV-19/England/CAMB-74D4C/2020  | Europe / United Kingdom / England | 2020-03-19 |
| Department of Pathology, University of Cambridge COVID-19 Genomics UK (COG-UK) Consortium Luke W                                                                                                                                                    |                                  |                                   |            |
| Meredith, M. Estee Torok , Myra Hosmillo, William L. Hamilton, Martin D. Curran, Theresa Feltwell, Anna Yakovleva, Charlotte J. Houldcroft, Aminu S. Jahun, Sarah L. Caddy, Ian Goodfellow                                                          |                                  |                                   |            |
| EPI_ISL_425373                                                                                                                                                                                                                                      | hCoV-19/England/CAMB-74D5B/2020  | Europe / United Kingdom / England | 2020-03-19 |
| Department of Pathology, University of Cambridge COVID-19 Genomics UK (COG-UK) Consortium Luke W                                                                                                                                                    |                                  |                                   |            |
| Meredith, M. Estee Torok , Myra Hosmillo, William L. Hamilton, Martin D. Curran, Theresa Feltwell, Anna Yakovleva, Charlotte J. Houldcroft, Aminu S. Jahun, Sarah L. Caddy, Ian Goodfellow                                                          |                                  |                                   |            |
| EPI_ISL_425374                                                                                                                                                                                                                                      | hCoV-19/England/CAMB-74D6A/2020  | Europe / United Kingdom / England | 2020-03-19 |
| Department of Pathology, University of Cambridge COVID-19 Genomics UK (COG-UK) Consortium Luke W                                                                                                                                                    |                                  |                                   |            |
| Meredith, M. Estee Torok , Myra Hosmillo, William L. Hamilton, Martin D. Curran, Theresa Feltwell, Anna Yakovleva, Charlotte J. Houldcroft, Aminu S. Jahun, Sarah L. Caddy, Ian Goodfellow                                                          |                                  |                                   |            |
| EPI_ISL_425382                                                                                                                                                                                                                                      | hCoV-19/England/CAMB-74E85/2020  | Europe / United Kingdom / England | 2020-03-18 |
| Department of Pathology, University of Cambridge COVID-19 Genomics UK (COG-UK) Consortium Luke W                                                                                                                                                    |                                  |                                   |            |
| Meredith, M. Estee Torok , Myra Hosmillo, William L. Hamilton, Martin D. Curran, Theresa Feltwell, Anna Yakovleva, Charlotte J. Houldcroft, Aminu S. Jahun, Sarah L. Caddy, Ian Goodfellow                                                          |                                  |                                   |            |
| EPI_ISL_425611                                                                                                                                                                                                                                      | hCoV-19/England/NOTT-10E8FA/2020 | Europe / United Kingdom / England | 2020-03-29 |
| Queens Medical Centre, Clinical Microbiology Department / DeepSeq Nottingham COVID-19 Genomics UK (COG-UK) Consortium Luke W                                                                                                                        |                                  |                                   |            |
| Gemma Clark, Wendy Smith, Manjinder Khakh, Hannah Howson-Wells, Jonathan Ball, Patrick McClure, Joseph Chappell, Theocharis Tsoleridis, Nadine Holmes, Matthew Carlisle, Christopher Moore, Fei Sang, Johnny Debebe, Victoria Wright, Matthew Loose |                                  |                                   |            |
| EPI_ISL_425614                                                                                                                                                                                                                                      | hCoV-19/England/NOTT-10E933/2020 | Europe / United Kingdom / England | 2020-03-29 |
| Queens Medical Centre, Clinical Microbiology Department / DeepSeq Nottingham COVID-19 Genomics UK (COG-UK) Consortium Luke W                                                                                                                        |                                  |                                   |            |
| Gemma Clark, Wendy Smith, Manjinder Khakh, Hannah Howson-Wells, Jonathan Ball, Patrick McClure, Joseph Chappell, Theocharis Tsoleridis, Nadine Holmes, Matthew Carlisle, Christopher Moore, Fei Sang, Johnny Debebe, Victoria Wright, Matthew Loose |                                  |                                   |            |
| EPI_ISL_425621                                                                                                                                                                                                                                      | hCoV-19/England/NOTT-10E9BB/2020 | Europe / United Kingdom / England | 2020-03-29 |
| Queens Medical Centre, Clinical Microbiology Department / DeepSeq Nottingham COVID-19 Genomics UK (COG-UK) Consortium Luke W                                                                                                                        |                                  |                                   |            |
| Gemma Clark, Wendy Smith, Manjinder Khakh, Hannah Howson-Wells, Jonathan Ball, Patrick McClure, Joseph Chappell, Theocharis Tsoleridis, Nadine Holmes, Matthew Carlisle, Christopher Moore, Fei Sang, Johnny Debebe, Victoria Wright, Matthew Loose |                                  |                                   |            |
| EPI_ISL_425628                                                                                                                                                                                                                                      | hCoV-19/England/NOTT-10EA30/2020 | Europe / United Kingdom / England | 2020-03-30 |
| Queens Medical Centre, Clinical Microbiology Department / DeepSeq Nottingham COVID-19 Genomics UK (COG-UK) Consortium Luke W                                                                                                                        |                                  |                                   |            |
| Gemma Clark, Wendy Smith, Manjinder Khakh, Hannah Howson-Wells, Jonathan Ball, Patrick McClure, Joseph Chappell, Theocharis Tsoleridis, Nadine Holmes, Matthew Carlisle, Christopher Moore, Fei Sang, Johnny Debebe, Victoria Wright, Matthew Loose |                                  |                                   |            |
| EPI_ISL_425630                                                                                                                                                                                                                                      | hCoV-19/England/NOTT-10EA5E/2020 | Europe / United Kingdom / England | 2020-03-29 |
| Queens Medical Centre, Clinical Microbiology Department / DeepSeq Nottingham COVID-19 Genomics UK (COG-UK) Consortium Luke W                                                                                                                        |                                  |                                   |            |
| Gemma Clark, Wendy Smith, Manjinder Khakh, Hannah Howson-Wells, Jonathan Ball, Patrick McClure, Joseph Chappell, Theocharis Tsoleridis, Nadine Holmes, Matthew Carlisle, Christopher Moore, Fei Sang, Johnny Debebe, Victoria Wright, Matthew Loose |                                  |                                   |            |
| EPI_ISL_425631                                                                                                                                                                                                                                      | hCoV-19/England/NOTT-10EA6D/2020 | Europe / United Kingdom / England | 2020-03-29 |
| Queens Medical Centre, Clinical Microbiology Department / DeepSeq Nottingham COVID-19 Genomics UK (COG-UK) Consortium Luke W                                                                                                                        |                                  |                                   |            |
| Gemma Clark, Wendy Smith, Manjinder Khakh, Hannah Howson-Wells, Jonathan Ball, Patrick McClure, Joseph Chappell, Theocharis Tsoleridis, Nadine Holmes, Matthew Carlisle, Christopher Moore, Fei Sang, Johnny Debebe, Victoria Wright, Matthew Loose |                                  |                                   |            |
| EPI_ISL_425632                                                                                                                                                                                                                                      | hCoV-19/England/NOTT-10EA7C/2020 | Europe / United Kingdom / England | 2020-03-30 |
| Queens Medical Centre, Clinical Microbiology Department / DeepSeq Nottingham COVID-19 Genomics UK (COG-UK) Consortium Luke W                                                                                                                        |                                  |                                   |            |
| Gemma Clark, Wendy Smith, Manjinder Khakh, Hannah Howson-Wells, Jonathan Ball, Patrick McClure, Joseph Chappell, Theocharis Tsoleridis, Nadine Holmes, Matthew Carlisle, Christopher Moore, Fei Sang, Johnny Debebe, Victoria Wright, Matthew Loose |                                  |                                   |            |
| EPI_ISL_425633                                                                                                                                                                                                                                      | hCoV-19/England/NOTT-10EA8B/2020 | Europe / United Kingdom / England | 2020-03-29 |
| Queens Medical Centre, Clinical Microbiology Department / DeepSeq Nottingham COVID-19 Genomics UK (COG-UK) Consortium Luke W                                                                                                                        |                                  |                                   |            |
| Gemma Clark, Wendy Smith, Manjinder Khakh, Hannah Howson-Wells, Jonathan Ball, Patrick McClure, Joseph Chappell, Theocharis Tsoleridis, Nadine Holmes, Matthew Carlisle, Christopher Moore, Fei Sang, Johnny Debebe, Victoria Wright, Matthew Loose |                                  |                                   |            |
| EPI_ISL_425635                                                                                                                                                                                                                                      | hCoV-19/England/NOTT-10EAA9/2020 | Europe / United Kingdom / England | 2020-03-30 |
| Queens Medical Centre, Clinical Microbiology Department / DeepSeq Nottingham COVID-19 Genomics UK (COG-UK) Consortium Luke W                                                                                                                        |                                  |                                   |            |



Consortium Gemma Clark, Wendy Smith, Manjinder Khakh, Hannah Howson-Wells, Jonathan Ball, Patrick McClure, Joseph Chappell, Theocharis Tsoleridis, Nadine Holmes, Matthew Carlisle, Christopher Moore, Fei Sang, Johnny Debebe, Victoria Wright, Matthew Loose  
 EPI\_ISL\_425638 hCoV-19/England/NOTT-10EAD6/2020 Europe / United Kingdom / England 2020-03-30  
 Queens Medical Centre, Clinical Microbiology Department / DeepSeq Nottingham COVID-19 Genomics UK (COG-UK)  
 Consortium Gemma Clark, Wendy Smith, Manjinder Khakh, Hannah Howson-Wells, Jonathan Ball, Patrick McClure, Joseph Chappell, Theocharis Tsoleridis, Nadine Holmes, Matthew Carlisle, Christopher Moore, Fei Sang, Johnny Debebe, Victoria Wright, Matthew Loose  
 EPI\_ISL\_425639 hCoV-19/England/NOTT-10EAE5/2020 Europe / United Kingdom / England 2020-03-30  
 Queens Medical Centre, Clinical Microbiology Department / DeepSeq Nottingham COVID-19 Genomics UK (COG-UK)  
 Consortium Gemma Clark, Wendy Smith, Manjinder Khakh, Hannah Howson-Wells, Jonathan Ball, Patrick McClure, Joseph Chappell, Theocharis Tsoleridis, Nadine Holmes, Matthew Carlisle, Christopher Moore, Fei Sang, Johnny Debebe, Victoria Wright, Matthew Loose  
 EPI\_ISL\_425640 hCoV-19/England/NOTT-10EAF4/2020 Europe / United Kingdom / England 2020-03-30  
 Queens Medical Centre, Clinical Microbiology Department / DeepSeq Nottingham COVID-19 Genomics UK (COG-UK)  
 Consortium Gemma Clark, Wendy Smith, Manjinder Khakh, Hannah Howson-Wells, Jonathan Ball, Patrick McClure, Joseph Chappell, Theocharis Tsoleridis, Nadine Holmes, Matthew Carlisle, Christopher Moore, Fei Sang, Johnny Debebe, Victoria Wright, Matthew Loose  
 EPI\_ISL\_425642 hCoV-19/England/NOTT-10EB2E/2020 Europe / United Kingdom / England 2020-03-30  
 Queens Medical Centre, Clinical Microbiology Department / DeepSeq Nottingham COVID-19 Genomics UK (COG-UK)  
 Consortium Gemma Clark, Wendy Smith, Manjinder Khakh, Hannah Howson-Wells, Jonathan Ball, Patrick McClure, Joseph Chappell, Theocharis Tsoleridis, Nadine Holmes, Matthew Carlisle, Christopher Moore, Fei Sang, Johnny Debebe, Victoria Wright, Matthew Loose  
 EPI\_ISL\_425644 hCoV-19/England/NOTT-10EB6A/2020 Europe / United Kingdom / England 2020-03-17  
 Queens Medical Centre, Clinical Microbiology Department / DeepSeq Nottingham COVID-19 Genomics UK (COG-UK)  
 Consortium Gemma Clark, Wendy Smith, Manjinder Khakh, Hannah Howson-Wells, Jonathan Ball, Patrick McClure, Joseph Chappell, Theocharis Tsoleridis, Nadine Holmes, Matthew Carlisle, Christopher Moore, Fei Sang, Johnny Debebe, Victoria Wright, Matthew Loose  
 EPI\_ISL\_425645 hCoV-19/England/NOTT-10EB79/2020 Europe / United Kingdom / England 2020-03-18  
 Queens Medical Centre, Clinical Microbiology Department / DeepSeq Nottingham COVID-19 Genomics UK (COG-UK)  
 Consortium Gemma Clark, Wendy Smith, Manjinder Khakh, Hannah Howson-Wells, Jonathan Ball, Patrick McClure, Joseph Chappell, Theocharis Tsoleridis, Nadine Holmes, Matthew Carlisle, Christopher Moore, Fei Sang, Johnny Debebe, Victoria Wright, Matthew Loose  
 EPI\_ISL\_425647 hCoV-19/Scotland/CVR100/2020 Europe / United Kingdom / Scotland 2020-03-14 West of  
 Scotland Specialist Virology Centre, NHSGGC / MRC-University of Glasgow Centre for Virus Research COVID-19 Genomics UK (COG-UK) Consortium Ana da Silva Filipe, Kathy Smollett, Stephen Carmichael, Natasha Johnson, Daniel Mair, Lily Tong, Jenna Nichols; Sarah McDonald; Richard Orton, Joseph Hughes, Sreenu Vattipally, David L Robertson; Kathy Li, Natasha Jesudason, Rajiv Shah, James Shepherd, Antonia Ho, Emma Thomson; Alasdair MacLean, Rory Gunson.  
 EPI\_ISL\_425648 hCoV-19/Scotland/CVR101/2020 Europe / United Kingdom / Scotland 2020-03-14 West of  
 Scotland Specialist Virology Centre, NHSGGC / MRC-University of Glasgow Centre for Virus Research COVID-19 Genomics UK (COG-UK) Consortium Ana da Silva Filipe, Kathy Smollett, Stephen Carmichael, Natasha Johnson, Daniel Mair, Lily Tong, Jenna Nichols; Sarah McDonald; Richard Orton, Joseph Hughes, Sreenu Vattipally, David L Robertson; Kathy Li, Natasha Jesudason, Rajiv Shah, James Shepherd, Antonia Ho, Emma Thomson; Alasdair MacLean, Rory Gunson.  
 EPI\_ISL\_425650 hCoV-19/Scotland/CVR103/2020 Europe / United Kingdom / Scotland 2020-03-13 West of  
 Scotland Specialist Virology Centre, NHSGGC / MRC-University of Glasgow Centre for Virus Research COVID-19 Genomics UK (COG-UK) Consortium Ana da Silva Filipe, Kathy Smollett, Stephen Carmichael, Natasha Johnson, Daniel Mair, Lily Tong, Jenna Nichols; Sarah McDonald; Richard Orton, Joseph Hughes, Sreenu Vattipally, David L Robertson; Kathy Li, Natasha Jesudason, Rajiv Shah, James Shepherd, Antonia Ho, Emma Thomson; Alasdair MacLean, Rory Gunson.  
 EPI\_ISL\_425651 hCoV-19/Scotland/CVR104/2020 Europe / United Kingdom / Scotland 2020-03-13 West of  
 Scotland Specialist Virology Centre, NHSGGC / MRC-University of Glasgow Centre for Virus Research COVID-19 Genomics UK (COG-UK) Consortium Ana da Silva Filipe, Kathy Smollett, Stephen Carmichael, Natasha Johnson, Daniel Mair, Lily Tong, Jenna Nichols; Sarah McDonald; Richard Orton, Joseph Hughes, Sreenu Vattipally, David L Robertson; Kathy Li, Natasha Jesudason, Rajiv Shah, James Shepherd, Antonia Ho, Emma Thomson; Alasdair MacLean, Rory Gunson.  
 EPI\_ISL\_425652 hCoV-19/Scotland/CVR106/2020 Europe / United Kingdom / Scotland 2020-03-13 West of  
 Scotland Specialist Virology Centre, NHSGGC / MRC-University of Glasgow Centre for Virus Research COVID-19 Genomics UK (COG-UK) Consortium Ana da Silva Filipe, Kathy Smollett, Stephen Carmichael, Natasha Johnson, Daniel Mair, Lily Tong, Jenna Nichols; Sarah McDonald; Richard Orton, Joseph Hughes, Sreenu Vattipally, David L Robertson; Kathy Li, Natasha Jesudason, Rajiv Shah, James Shepherd, Antonia Ho, Emma Thomson; Alasdair MacLean, Rory Gunson.  
 EPI\_ISL\_425653 hCoV-19/Scotland/CVR107/2020 Europe / United Kingdom / Scotland 2020-03-13 West of  
 Scotland Specialist Virology Centre, NHSGGC / MRC-University of Glasgow Centre for Virus Research COVID-19 Genomics UK (COG-UK) Consortium Ana da Silva Filipe, Kathy Smollett, Stephen Carmichael, Natasha Johnson, Daniel Mair, Lily Tong, Jenna Nichols; Sarah McDonald; Richard Orton, Joseph Hughes, Sreenu Vattipally, David L Robertson; Kathy Li, Natasha Jesudason, Rajiv Shah, James Shepherd, Antonia Ho, Emma Thomson; Alasdair MacLean, Rory Gunson.  
 EPI\_ISL\_425654 hCoV-19/Scotland/CVR108/2020 Europe / United Kingdom / Scotland 2020-03-13 West of





Johnson, Daniel Mair, Lily Tong, Jenna Nichols; Sarah McDonald; Richard Orton, Joseph Hughes, Sreenu Vattipally, David L Robertson; Kathy Li, Natasha Jesudason, Rajiv Shah, James Shepherd, Antonia Ho, Emma Thomson; Alasdair MacLean, Rory Gunson.

EPI\_ISL\_425692 hCoV-19/Scotland/CVR15/2020 Europe / United Kingdom / Scotland 2020-03-12 West of Scotland Specialist Virology Centre, NHSGGC / MRC-University of Glasgow Centre for Virus Research COVID-19 Genomics UK (COG-UK) Consortium Ana da Silva Filipe, Kathy Smollett, Stephen Carmichael, Natasha Johnson, Daniel Mair, Lily Tong, Jenna Nichols; Sarah McDonald; Richard Orton, Joseph Hughes, Sreenu Vattipally, David L Robertson; Kathy Li, Natasha Jesudason, Rajiv Shah, James Shepherd, Antonia Ho, Emma Thomson; Alasdair MacLean, Rory Gunson.

EPI\_ISL\_425693 hCoV-19/Scotland/CVR150/2020 Europe / United Kingdom / Scotland 2020-03-16 West of Scotland Specialist Virology Centre, NHSGGC / MRC-University of Glasgow Centre for Virus Research COVID-19 Genomics UK (COG-UK) Consortium Ana da Silva Filipe, Kathy Smollett, Stephen Carmichael, Natasha Johnson, Daniel Mair, Lily Tong, Jenna Nichols; Sarah McDonald; Richard Orton, Joseph Hughes, Sreenu Vattipally, David L Robertson; Kathy Li, Natasha Jesudason, Rajiv Shah, James Shepherd, Antonia Ho, Emma Thomson; Alasdair MacLean, Rory Gunson.

EPI\_ISL\_425695 hCoV-19/Scotland/CVR152/2020 Europe / United Kingdom / Scotland 2020-03-16 West of Scotland Specialist Virology Centre, NHSGGC / MRC-University of Glasgow Centre for Virus Research COVID-19 Genomics UK (COG-UK) Consortium Ana da Silva Filipe, Kathy Smollett, Stephen Carmichael, Natasha Johnson, Daniel Mair, Lily Tong, Jenna Nichols; Sarah McDonald; Richard Orton, Joseph Hughes, Sreenu Vattipally, David L Robertson; Kathy Li, Natasha Jesudason, Rajiv Shah, James Shepherd, Antonia Ho, Emma Thomson; Alasdair MacLean, Rory Gunson.

EPI\_ISL\_425696 hCoV-19/Scotland/CVR153/2020 Europe / United Kingdom / Scotland 2020-03-17 West of Scotland Specialist Virology Centre, NHSGGC / MRC-University of Glasgow Centre for Virus Research COVID-19 Genomics UK (COG-UK) Consortium Ana da Silva Filipe, Kathy Smollett, Stephen Carmichael, Natasha Johnson, Daniel Mair, Lily Tong, Jenna Nichols; Sarah McDonald; Richard Orton, Joseph Hughes, Sreenu Vattipally, David L Robertson; Kathy Li, Natasha Jesudason, Rajiv Shah, James Shepherd, Antonia Ho, Emma Thomson; Alasdair MacLean, Rory Gunson.

EPI\_ISL\_425697 hCoV-19/Scotland/CVR155/2020 Europe / United Kingdom / Scotland 2020-03-17 West of Scotland Specialist Virology Centre, NHSGGC / MRC-University of Glasgow Centre for Virus Research COVID-19 Genomics UK (COG-UK) Consortium Ana da Silva Filipe, Kathy Smollett, Stephen Carmichael, Natasha Johnson, Daniel Mair, Lily Tong, Jenna Nichols; Sarah McDonald; Richard Orton, Joseph Hughes, Sreenu Vattipally, David L Robertson; Kathy Li, Natasha Jesudason, Rajiv Shah, James Shepherd, Antonia Ho, Emma Thomson; Alasdair MacLean, Rory Gunson.

EPI\_ISL\_425698 hCoV-19/Scotland/CVR159/2020 Europe / United Kingdom / Scotland 2020-03-17 West of Scotland Specialist Virology Centre, NHSGGC / MRC-University of Glasgow Centre for Virus Research COVID-19 Genomics UK (COG-UK) Consortium Ana da Silva Filipe, Kathy Smollett, Stephen Carmichael, Natasha Johnson, Daniel Mair, Lily Tong, Jenna Nichols; Sarah McDonald; Richard Orton, Joseph Hughes, Sreenu Vattipally, David L Robertson; Kathy Li, Natasha Jesudason, Rajiv Shah, James Shepherd, Antonia Ho, Emma Thomson; Alasdair MacLean, Rory Gunson.

EPI\_ISL\_425699 hCoV-19/Scotland/CVR16/2020 Europe / United Kingdom / Scotland 2020-03-12 West of Scotland Specialist Virology Centre, NHSGGC / MRC-University of Glasgow Centre for Virus Research COVID-19 Genomics UK (COG-UK) Consortium Ana da Silva Filipe, Kathy Smollett, Stephen Carmichael, Natasha Johnson, Daniel Mair, Lily Tong, Jenna Nichols; Sarah McDonald; Richard Orton, Joseph Hughes, Sreenu Vattipally, David L Robertson; Kathy Li, Natasha Jesudason, Rajiv Shah, James Shepherd, Antonia Ho, Emma Thomson; Alasdair MacLean, Rory Gunson.

EPI\_ISL\_426617 hCoV-19/USA/NY-NYUMC162/2020 North America / USA / New York / Suffolk county 2020-04-01 NYU Langone Health Departments of Pathology and Medicine, New York University School of Medicine Maria Aguero-Rosenfeld, Brendan Belovarac, Margaret Black, Ludovic Boytard, John Cadley, Paolo Cotzia, John Chen, Dacia Dimartino, Xiaojun Feng, Tatyana Gindin, Emily Guzman, Adriana Heguy, Megan Hogan, Emily Huang, George Jour, Andrew Lytle, Christian Marier, Matthew T. Maurano, Mark J. Mulligan, Peter Meyn, Iman Osman, Jared Pinnell, Vanessa Raabe, Sitharam Ramaswami, Amy Rapkiewicz, Marie Samanovic-Golden, Antonio Serrano, Guomiao Shen, Matija Snuderl, Theodore Vougiouklakis, Nick Vulpescu, Gael Westby, Paul Zappile, Yutong Zhang

EPI\_ISL\_426618 hCoV-19/USA/NY-NYUMC163/2020 North America / USA / New York / Nassau county 2020-04-01 NYU Langone Health Departments of Pathology and Medicine, New York University School of Medicine Maria Aguero-Rosenfeld, Brendan Belovarac, Margaret Black, Ludovic Boytard, John Cadley, Paolo Cotzia, John Chen, Dacia Dimartino, Xiaojun Feng, Tatyana Gindin, Emily Guzman, Adriana Heguy, Megan Hogan, Emily Huang, George Jour, Andrew Lytle, Christian Marier, Matthew T. Maurano, Mark J. Mulligan, Peter Meyn, Iman Osman, Jared Pinnell, Vanessa Raabe, Sitharam Ramaswami, Amy Rapkiewicz, Marie Samanovic-Golden, Antonio Serrano, Guomiao Shen, Matija Snuderl, Theodore Vougiouklakis, Nick Vulpescu, Gael Westby, Paul Zappile, Yutong Zhang

EPI\_ISL\_426619 hCoV-19/USA/NY-NYUMC164/2020 North America / USA / New York / Nassau county 2020-04-01 NYU Langone Health Departments of Pathology and Medicine, New York University School of Medicine Maria Aguero-Rosenfeld, Brendan Belovarac, Margaret Black, Ludovic Boytard, John Cadley, Paolo Cotzia, John Chen, Dacia Dimartino, Xiaojun Feng, Tatyana Gindin, Emily Guzman, Adriana Heguy, Megan Hogan, Emily Huang, George Jour, Andrew Lytle, Christian Marier, Matthew T. Maurano, Mark J. Mulligan, Peter Meyn, Iman Osman, Jared Pinnell, Vanessa Raabe, Sitharam Ramaswami, Amy Rapkiewicz, Marie Samanovic-Golden, Antonio Serrano, Guomiao Shen, Matija Snuderl, Theodore Vougiouklakis, Nick Vulpescu, Gael Westby, Paul Zappile, Yutong Zhang

EPI\_ISL\_426620 hCoV-19/USA/NY-NYUMC165/2020 North America / USA / New York / Brooklyn 2020-04-01 NYU Langone Health Departments of Pathology and Medicine, New York University School of Medicine Maria Aguero-Rosenfeld, Brendan Belovarac, Margaret Black, Ludovic Boytard, John Cadley, Paolo Cotzia, John Chen, Dacia Dimartino, Xiaojun Feng, Tatyana Gindin, Emily Guzman, Adriana Heguy, Megan Hogan, Emily Huang, George

Jour, Andrew Lytle, Christian Marier, Matthew T. Maurano, Mark J. Mulligan, Peter Meyn, Iman Osman, Jared Pinnell, Vanessa Raabe, Sitharam Ramaswami, Amy Rapkiewicz, Marie Samanovic-Golden, Antonio Serrano, Guomiao Shen, Matija Snuderl, Theodore Vougiouklakis, Nick Vulpescu, Gael Westby, Paul Zappile, Yutong Zhang  
 EPI\_ISL\_426621 hCoV-19/USA/NY-NYUMC166/2020 North America / USA / New York / Brooklyn 2020-04-01  
 NYU Langone Health Departments of Pathology and Medicine, New York University School of Medicine Maria Aguero-Rosenfeld, Brendan Belovarac, Margaret Black, Ludovic Boytard, John Cadley, Paolo Cotzia, John Chen, Dacia Dimartino, Xiaojun Feng, Tatyana Gindin, Emily Guzman, Adriana Heguy, Megan Hogan, Emily Huang, George Jour, Andrew Lytle, Christian Marier, Matthew T. Maurano, Mark J. Mulligan, Peter Meyn, Iman Osman, Jared Pinnell, Vanessa Raabe, Sitharam Ramaswami, Amy Rapkiewicz, Marie Samanovic-Golden, Antonio Serrano, Guomiao Shen, Matija Snuderl, Theodore Vougiouklakis, Nick Vulpescu, Gael Westby, Paul Zappile, Yutong Zhang  
 EPI\_ISL\_426622 hCoV-19/USA/NY-NYUMC167/2020 North America / USA / New York / Manhattan 2020-04-01  
 NYU Langone Health Departments of Pathology and Medicine, New York University School of Medicine Maria Aguero-Rosenfeld, Brendan Belovarac, Margaret Black, Ludovic Boytard, John Cadley, Paolo Cotzia, John Chen, Dacia Dimartino, Xiaojun Feng, Tatyana Gindin, Emily Guzman, Adriana Heguy, Megan Hogan, Emily Huang, George Jour, Andrew Lytle, Christian Marier, Matthew T. Maurano, Mark J. Mulligan, Peter Meyn, Iman Osman, Jared Pinnell, Vanessa Raabe, Sitharam Ramaswami, Amy Rapkiewicz, Marie Samanovic-Golden, Antonio Serrano, Guomiao Shen, Matija Snuderl, Theodore Vougiouklakis, Nick Vulpescu, Gael Westby, Paul Zappile, Yutong Zhang  
 EPI\_ISL\_426623 hCoV-19/USA/NY-NYUMC168/2020 North America / USA / New York / Manhattan 2020-04-01  
 NYU Langone Health Departments of Pathology and Medicine, New York University School of Medicine Maria Aguero-Rosenfeld, Brendan Belovarac, Margaret Black, Ludovic Boytard, John Cadley, Paolo Cotzia, John Chen, Dacia Dimartino, Xiaojun Feng, Tatyana Gindin, Emily Guzman, Adriana Heguy, Megan Hogan, Emily Huang, George Jour, Andrew Lytle, Christian Marier, Matthew T. Maurano, Mark J. Mulligan, Peter Meyn, Iman Osman, Jared Pinnell, Vanessa Raabe, Sitharam Ramaswami, Amy Rapkiewicz, Marie Samanovic-Golden, Antonio Serrano, Guomiao Shen, Matija Snuderl, Theodore Vougiouklakis, Nick Vulpescu, Gael Westby, Paul Zappile, Yutong Zhang  
 EPI\_ISL\_426624 hCoV-19/USA/NY-NYUMC169/2020 North America / USA / New York / Brooklyn 2020-04-01  
 NYU Langone Health Departments of Pathology and Medicine, New York University School of Medicine Maria Aguero-Rosenfeld, Brendan Belovarac, Margaret Black, Ludovic Boytard, John Cadley, Paolo Cotzia, John Chen, Dacia Dimartino, Xiaojun Feng, Tatyana Gindin, Emily Guzman, Adriana Heguy, Megan Hogan, Emily Huang, George Jour, Andrew Lytle, Christian Marier, Matthew T. Maurano, Mark J. Mulligan, Peter Meyn, Iman Osman, Jared Pinnell, Vanessa Raabe, Sitharam Ramaswami, Amy Rapkiewicz, Marie Samanovic-Golden, Antonio Serrano, Guomiao Shen, Matija Snuderl, Theodore Vougiouklakis, Nick Vulpescu, Gael Westby, Paul Zappile, Yutong Zhang  
 EPI\_ISL\_426625 hCoV-19/USA/NY-NYUMC170/2020 North America / USA / New York / Brooklyn 2020-04-01  
 NYU Langone Health Departments of Pathology and Medicine, New York University School of Medicine Maria Aguero-Rosenfeld, Brendan Belovarac, Margaret Black, Ludovic Boytard, John Cadley, Paolo Cotzia, John Chen, Dacia Dimartino, Xiaojun Feng, Tatyana Gindin, Emily Guzman, Adriana Heguy, Megan Hogan, Emily Huang, George Jour, Andrew Lytle, Christian Marier, Matthew T. Maurano, Mark J. Mulligan, Peter Meyn, Iman Osman, Jared Pinnell, Vanessa Raabe, Sitharam Ramaswami, Amy Rapkiewicz, Marie Samanovic-Golden, Antonio Serrano, Guomiao Shen, Matija Snuderl, Theodore Vougiouklakis, Nick Vulpescu, Gael Westby, Paul Zappile, Yutong Zhang  
 EPI\_ISL\_426626 hCoV-19/USA/NY-NYUMC171/2020 North America / USA / New York / Brooklyn 2020-04-01  
 NYU Langone Health Departments of Pathology and Medicine, New York University School of Medicine Maria Aguero-Rosenfeld, Brendan Belovarac, Margaret Black, Ludovic Boytard, John Cadley, Paolo Cotzia, John Chen, Dacia Dimartino, Xiaojun Feng, Tatyana Gindin, Emily Guzman, Adriana Heguy, Megan Hogan, Emily Huang, George Jour, Andrew Lytle, Christian Marier, Matthew T. Maurano, Mark J. Mulligan, Peter Meyn, Iman Osman, Jared Pinnell, Vanessa Raabe, Sitharam Ramaswami, Amy Rapkiewicz, Marie Samanovic-Golden, Antonio Serrano, Guomiao Shen, Matija Snuderl, Theodore Vougiouklakis, Nick Vulpescu, Gael Westby, Paul Zappile, Yutong Zhang  
 EPI\_ISL\_426627 hCoV-19/USA/LA-BIE-096/2020 North America / USA / Louisiana 2020-04-06 Ochsner Health BioInfoExperts, LLC Amy Feehan, David Nolan, Rebecca Rose, Susanna Lamers, Sissy Cross, Julia-Garcia-Diaz, Tong Yang, Luke Caruso, David Moraga Amador, Wayra Navia, Lydia Von Borstel, Xiao Hui Zhou  
 EPI\_ISL\_426628 hCoV-19/USA/LA-BIE-097/2020 North America / USA / Louisiana 2020-04-06 Ochsner Health BioInfoExperts, LLC Amy Feehan, David Nolan, Rebecca Rose, Susanna Lamers, Sissy Cross, Julia-Garcia-Diaz, Tong Yang, Luke Caruso, David Moraga Amador, Wayra Navia, Lydia Von Borstel, Xiao Hui Zhou  
 EPI\_ISL\_426629 hCoV-19/Taiwan/TSGH-01/2020 Asia / Taiwan / Taipei 2020-02-07 TSGH-CP molecular lab TSGH-CP molecular lab Chheng-Lih Perng, Ming-Jr Jian, Chih-Kai Chang, Jung-Chung Lin, Kuo-Ming Yeh, Chien-Wen Chen, Sheng-Kang Chiu, Hsing-Yi Chung, Shih-Hung Tsai, Kuo-Sheng Hung, Feng-Yee Chang, Hung-Sheng Shang  
 EPI\_ISL\_426637 hCoV-19/Australia/VIC327/2020 Oceania / Australia / Victoria 2020-03-17 Victorian Infectious Diseases Reference Laboratory (VIDRL) Microbiological Diagnostic Unit Public Health Laboratory and Victorian Infectious Diseases Reference Laboratory, Doherty Institute Caly L., Seemann T., Sait, M., Schultz M., Druce J., Sherry, N.  
 EPI\_ISL\_426638 hCoV-19/Australia/VIC328/2020 Oceania / Australia / Victoria 2020-03-17 Victorian Infectious Diseases Reference Laboratory (VIDRL) Microbiological Diagnostic Unit Public Health Laboratory and Victorian Infectious Diseases Reference Laboratory, Doherty Institute Caly L., Seemann T., Sait, M., Schultz M., Druce J., Sherry, N.  
 EPI\_ISL\_426639 hCoV-19/Australia/VIC329/2020 Oceania / Australia / Victoria 2020-03-17 Victorian Infectious Diseases Reference Laboratory (VIDRL) Microbiological Diagnostic Unit Public Health Laboratory and Victorian Infectious Diseases Reference Laboratory, Doherty Institute Caly L., Seemann T., Sait, M., Schultz M., Druce J., Sherry, N.  
 EPI\_ISL\_426640 hCoV-19/Australia/VIC330/2020 Oceania / Australia / Victoria 2020-03-18 Victorian Infectious Diseases Reference Laboratory (VIDRL) Microbiological Diagnostic Unit Public Health Laboratory and Victorian Infectious Diseases Reference Laboratory, Doherty Institute Caly L., Seemann T., Sait, M., Schultz M., Druce J., Sherry, N.















|                                                                                                                            |                                   |                                 |                                                               |            |                                                                 |
|----------------------------------------------------------------------------------------------------------------------------|-----------------------------------|---------------------------------|---------------------------------------------------------------|------------|-----------------------------------------------------------------|
| Sait, M., Schultz M., Druce J., Sherry, N.                                                                                 | EPI_ISL_426994                    | hCoV-19/Australia/VIC707/2020   | Oceania / Australia / Victoria                                | 2020-03-29 | Victorian                                                       |
| Infectious Diseases Reference Laboratory (VIDRL)                                                                           |                                   |                                 | Microbiological Diagnostic Unit                               |            | Public Health                                                   |
| Laboratory and Victorian Infectious Diseases Reference Laboratory, Doherty Institute                                       |                                   |                                 |                                                               |            | Caly L., Seemann T., Sait, M., Schultz M., Druce J., Sherry, N. |
| Sait, M., Schultz M., Druce J., Sherry, N.                                                                                 | EPI_ISL_426995                    | hCoV-19/Australia/VIC708/2020   | Oceania / Australia / Victoria                                | 2020-03-29 | Victorian                                                       |
| Infectious Diseases Reference Laboratory (VIDRL)                                                                           |                                   |                                 | Microbiological Diagnostic Unit                               |            | Public Health                                                   |
| Laboratory and Victorian Infectious Diseases Reference Laboratory, Doherty Institute                                       |                                   |                                 |                                                               |            | Caly L., Seemann T., Sait, M., Schultz M., Druce J., Sherry, N. |
| Sait, M., Schultz M., Druce J., Sherry, N.                                                                                 | EPI_ISL_426997                    | hCoV-19/Australia/VIC710/2020   | Oceania / Australia / Victoria                                | 2020-03-29 | Victorian                                                       |
| Infectious Diseases Reference Laboratory (VIDRL)                                                                           |                                   |                                 | Microbiological Diagnostic Unit                               |            | Public Health                                                   |
| Laboratory and Victorian Infectious Diseases Reference Laboratory, Doherty Institute                                       |                                   |                                 |                                                               |            | Caly L., Seemann T., Sait, M., Schultz M., Druce J., Sherry, N. |
| Sait, M., Schultz M., Druce J., Sherry, N.                                                                                 | EPI_ISL_426999                    | hCoV-19/Australia/VIC712/2020   | Oceania / Australia / Victoria                                | 2020-03-29 | Victorian                                                       |
| Infectious Diseases Reference Laboratory (VIDRL)                                                                           |                                   |                                 | Microbiological Diagnostic Unit                               |            | Public Health                                                   |
| Laboratory and Victorian Infectious Diseases Reference Laboratory, Doherty Institute                                       |                                   |                                 |                                                               |            | Caly L., Seemann T., Sait, M., Schultz M., Druce J., Sherry, N. |
| Sait, M., Schultz M., Druce J., Sherry, N.                                                                                 | EPI_ISL_429196                    | hCoV-19/Switzerland/GE3144/2020 | Europe / Switzerland                                          | 2020-03-18 | University Hospitals of Geneva                                  |
| Laboratory of Virology                                                                                                     |                                   |                                 | University Hospitals of Geneva                                |            | Laboratory of Virology                                          |
| Laubscher F.                                                                                                               |                                   |                                 |                                                               |            |                                                                 |
| EPI_ISL_429197                                                                                                             | hCoV-19/Switzerland/GE0199-2/2020 |                                 | Europe / Switzerland                                          | 2020-03-21 | University                                                      |
| Hospitals of Geneva                                                                                                        |                                   |                                 | University Hospitals of Geneva                                |            | Laboratory of Virology                                          |
| Laubscher F.                                                                                                               |                                   |                                 |                                                               |            |                                                                 |
| EPI_ISL_429199                                                                                                             | hCoV-19/Switzerland/GE0636/2020   |                                 | Europe / Switzerland                                          | 2020-03-22 | University Hospitals of Geneva                                  |
| Laboratory of Virology                                                                                                     |                                   |                                 | University Hospitals of Geneva                                |            | Laboratory of Virology                                          |
| Laubscher F.                                                                                                               |                                   |                                 |                                                               |            |                                                                 |
| EPI_ISL_429200                                                                                                             | hCoV-19/Switzerland/GE5737/2020   |                                 | Europe / Switzerland                                          | 2020-03-19 | University Hospitals of Geneva                                  |
| Laboratory of Virology                                                                                                     |                                   |                                 | University Hospitals of Geneva                                |            | Laboratory of Virology                                          |
| Laubscher F.                                                                                                               |                                   |                                 |                                                               |            |                                                                 |
| EPI_ISL_429201                                                                                                             | hCoV-19/Switzerland/GE2297/2020   |                                 | Europe / Switzerland                                          | 2020-03-29 | University Hospitals of Geneva                                  |
| Laboratory of Virology                                                                                                     |                                   |                                 | University Hospitals of Geneva                                |            | Laboratory of Virology                                          |
| Laubscher F.                                                                                                               |                                   |                                 |                                                               |            |                                                                 |
| EPI_ISL_429203                                                                                                             | hCoV-19/Switzerland/GE1736/2020   |                                 | Europe / Switzerland                                          | 2020-03-21 | University Hospitals of Geneva                                  |
| Laboratory of Virology                                                                                                     |                                   |                                 | University Hospitals of Geneva                                |            | Laboratory of Virology                                          |
| Laubscher F.                                                                                                               |                                   |                                 |                                                               |            |                                                                 |
| EPI_ISL_429204                                                                                                             | hCoV-19/Switzerland/GE7617/2020   |                                 | Europe / Switzerland                                          | 2020-04-03 | University Hospitals of Geneva                                  |
| Laboratory of Virology                                                                                                     |                                   |                                 | University Hospitals of Geneva                                |            | Laboratory of Virology                                          |
| Laubscher F.                                                                                                               |                                   |                                 |                                                               |            |                                                                 |
| EPI_ISL_429206                                                                                                             | hCoV-19/Switzerland/GE5007/2020   |                                 | Europe / Switzerland                                          | 2020-04-07 | University Hospitals of Geneva                                  |
| Laboratory of Virology                                                                                                     |                                   |                                 | University Hospitals of Geneva                                |            | Laboratory of Virology                                          |
| Laubscher F.                                                                                                               |                                   |                                 |                                                               |            |                                                                 |
| EPI_ISL_429207                                                                                                             | hCoV-19/Switzerland/GE1184/2020   |                                 | Europe / Switzerland                                          | 2020-04-03 | University Hospitals of Geneva                                  |
| Laboratory of Virology                                                                                                     |                                   |                                 | University Hospitals of Geneva                                |            | Laboratory of Virology                                          |
| Laubscher F.                                                                                                               |                                   |                                 |                                                               |            |                                                                 |
| EPI_ISL_429208                                                                                                             | hCoV-19/Switzerland/GE2164/2020   |                                 | Europe / Switzerland                                          | 2020-03-17 | University Hospitals of Geneva                                  |
| Laboratory of Virology                                                                                                     |                                   |                                 | University Hospitals of Geneva                                |            | Laboratory of Virology                                          |
| Laubscher F.                                                                                                               |                                   |                                 |                                                               |            |                                                                 |
| EPI_ISL_429209                                                                                                             | hCoV-19/Switzerland/GE3650/2020   |                                 | Europe / Switzerland                                          | 2020-03-16 | University Hospitals of Geneva                                  |
| Laboratory of Virology                                                                                                     |                                   |                                 | University Hospitals of Geneva                                |            | Laboratory of Virology                                          |
| Laubscher F.                                                                                                               |                                   |                                 |                                                               |            |                                                                 |
| EPI_ISL_429210                                                                                                             | hCoV-19/Switzerland/GE8147/2020   |                                 | Europe / Switzerland                                          | 2020-03-16 | University Hospitals of Geneva                                  |
| Laboratory of Virology                                                                                                     |                                   |                                 | University Hospitals of Geneva                                |            | Laboratory of Virology                                          |
| Laubscher F.                                                                                                               |                                   |                                 |                                                               |            |                                                                 |
| EPI_ISL_429211                                                                                                             | hCoV-19/Switzerland/GE5708/2020   |                                 | Europe / Switzerland                                          | 2020-03-24 | University Hospitals of Geneva                                  |
| Laboratory of Virology                                                                                                     |                                   |                                 | University Hospitals of Geneva                                |            | Laboratory of Virology                                          |
| Laubscher F.                                                                                                               |                                   |                                 |                                                               |            |                                                                 |
| EPI_ISL_429212                                                                                                             | hCoV-19/Switzerland/GE0056/2020   |                                 | Europe / Switzerland                                          | 2020-03-24 | University Hospitals of Geneva                                  |
| Laboratory of Virology                                                                                                     |                                   |                                 | University Hospitals of Geneva                                |            | Laboratory of Virology                                          |
| Laubscher F.                                                                                                               |                                   |                                 |                                                               |            |                                                                 |
| EPI_ISL_429213                                                                                                             | hCoV-19/Switzerland/GE8086/2020   |                                 | Europe / Switzerland                                          | 2020-03-16 | University Hospitals of Geneva                                  |
| Laboratory of Virology                                                                                                     |                                   |                                 | University Hospitals of Geneva                                |            | Laboratory of Virology                                          |
| Laubscher F.                                                                                                               |                                   |                                 |                                                               |            |                                                                 |
| EPI_ISL_429214                                                                                                             | hCoV-19/Switzerland/GE2759/2020   |                                 | Europe / Switzerland                                          | 2020-03-23 | University Hospitals of Geneva                                  |
| Laboratory of Virology                                                                                                     |                                   |                                 | University Hospitals of Geneva                                |            | Laboratory of Virology                                          |
| Laubscher F.                                                                                                               |                                   |                                 |                                                               |            |                                                                 |
| EPI_ISL_429215                                                                                                             | hCoV-19/Switzerland/GE4807/2020   |                                 | Europe / Switzerland                                          | 2020-03-23 | University Hospitals of Geneva                                  |
| Laboratory of Virology                                                                                                     |                                   |                                 | University Hospitals of Geneva                                |            | Laboratory of Virology                                          |
| Laubscher F.                                                                                                               |                                   |                                 |                                                               |            |                                                                 |
| EPI_ISL_429217                                                                                                             | hCoV-19/Switzerland/GE6414/2020   |                                 | Europe / Switzerland                                          | 2020-04-06 | University Hospitals of Geneva                                  |
| Laboratory of Virology                                                                                                     |                                   |                                 | University Hospitals of Geneva                                |            | Laboratory of Virology                                          |
| Laubscher F.                                                                                                               |                                   |                                 |                                                               |            |                                                                 |
| EPI_ISL_429218                                                                                                             | hCoV-19/Switzerland/GE0304/2020   |                                 | Europe / Switzerland                                          | 2020-04-02 | University Hospitals of Geneva                                  |
| Laboratory of Virology                                                                                                     |                                   |                                 | University Hospitals of Geneva                                |            | Laboratory of Virology                                          |
| Laubscher F.                                                                                                               |                                   |                                 |                                                               |            |                                                                 |
| EPI_ISL_429219                                                                                                             | hCoV-19/Switzerland/GE2453/2020   |                                 | Europe / Switzerland                                          | 2020-04-03 | University Hospitals of Geneva                                  |
| Laboratory of Virology                                                                                                     |                                   |                                 | University Hospitals of Geneva                                |            | Laboratory of Virology                                          |
| Laubscher F.                                                                                                               |                                   |                                 |                                                               |            |                                                                 |
| EPI_ISL_429220                                                                                                             | hCoV-19/Switzerland/GE6065/2020   |                                 | Europe / Switzerland                                          | 2020-04-06 | University Hospitals of Geneva                                  |
| Laboratory of Virology                                                                                                     |                                   |                                 | University Hospitals of Geneva                                |            | Laboratory of Virology                                          |
| Laubscher F.                                                                                                               |                                   |                                 |                                                               |            |                                                                 |
| EPI_ISL_429221                                                                                                             | hCoV-19/Switzerland/GE6099/2020   |                                 | Europe / Switzerland                                          | 2020-04-06 | University Hospitals of Geneva                                  |
| Laboratory of Virology                                                                                                     |                                   |                                 | University Hospitals of Geneva                                |            | Laboratory of Virology                                          |
| Laubscher F.                                                                                                               |                                   |                                 |                                                               |            |                                                                 |
| EPI_ISL_429222                                                                                                             | hCoV-19/Switzerland/GE3655/2020   |                                 | Europe / Switzerland                                          | 2020-04-07 | University Hospitals of Geneva                                  |
| Laboratory of Virology                                                                                                     |                                   |                                 | University Hospitals of Geneva                                |            | Laboratory of Virology                                          |
| Laubscher F.                                                                                                               |                                   |                                 |                                                               |            |                                                                 |
| EPI_ISL_429223                                                                                                             | hCoV-19/Switzerland/GE4644/2020   |                                 | Europe / Switzerland                                          | 2020-04-07 | University Hospitals of Geneva                                  |
| Laboratory of Virology                                                                                                     |                                   |                                 | University Hospitals of Geneva                                |            | Laboratory of Virology                                          |
| Laubscher F.                                                                                                               |                                   |                                 |                                                               |            |                                                                 |
| EPI_ISL_429226                                                                                                             | hCoV-19/Italy/TE5551/2020         |                                 | Europe / Italy / Abruzzo                                      | 2020-03-17 | Presidio                                                        |
| Ospedaliero Santo Spirito                                                                                                  |                                   |                                 | "Istituto Zooprofilattico Sperimentale dell'Abruzzo e Molise" |            | "G. Caporale"                                                   |
| Lorusso A, Marcacci M, Di Domenico M, Ancora M, Curini V, Mangone I, Rinaldi A, Di Pasquale A, Camma C, Puglia I, Savini G |                                   |                                 |                                                               |            |                                                                 |

|                                                                                                                                                                                                         |                             |                                                     |            |                                                                                                                                                                                                                                                                                                                                                  |
|---------------------------------------------------------------------------------------------------------------------------------------------------------------------------------------------------------|-----------------------------|-----------------------------------------------------|------------|--------------------------------------------------------------------------------------------------------------------------------------------------------------------------------------------------------------------------------------------------------------------------------------------------------------------------------------------------|
| EPI_ISL_429227                                                                                                                                                                                          | hCoV-19/Italy/TE5553/2020   | Europe / Italy / Abruzzo                            | 2020-03-17 | Presidio Ospedaliero Santo Spirito                                                                                                                                                                                                                                                                                                               |
| "Istituto Zooprofilattico Sperimentale dell'Abruzzo e Molise ""G. Caporale""                                                                                                                            |                             |                                                     |            |                                                                                                                                                                                                                                                                                                                                                  |
| Lorusso A, Marcacci M, Di Domenico M, Ancora M, Curini V, Mangone I, Rinaldi A, Di Pasquale A, Camma C, Puglia I, Savini G                                                                              |                             |                                                     |            |                                                                                                                                                                                                                                                                                                                                                  |
| EPI_ISL_429228                                                                                                                                                                                          | hCoV-19/Italy/TE5674/2020   | Europe / Italy / Abruzzo                            | 2020-03-20 | Ospedale Civile Giuseppe Mazzini                                                                                                                                                                                                                                                                                                                 |
| "Istituto Zooprofilattico Sperimentale dell'Abruzzo e Molise ""G. Caporale"" Lorusso A, Marcacci M, Di Domenico M, Ancora M, Curini V, Mangone I, Rinaldi A, Di Pasquale A, Camma C, Puglia I, Savini G |                             |                                                     |            |                                                                                                                                                                                                                                                                                                                                                  |
| EPI_ISL_430179                                                                                                                                                                                          | hCoV-19/USA/WA-S142/2020    | North America / USA / Washington / King County      | 2020-03-13 | Washington State Department of Health Seattle Flu Study Chu et al                                                                                                                                                                                                                                                                                |
| EPI_ISL_430180                                                                                                                                                                                          | hCoV-19/USA/WA-S143/2020    | North America / USA / Washington / King County      | 2020-03-15 | Washington State Department of Health Seattle Flu Study Chu et al                                                                                                                                                                                                                                                                                |
| EPI_ISL_430181                                                                                                                                                                                          | hCoV-19/USA/WA-S144/2020    | North America / USA / Washington / King County      | 2020-03-15 | Washington State Department of Health Seattle Flu Study Chu et al                                                                                                                                                                                                                                                                                |
| EPI_ISL_430182                                                                                                                                                                                          | hCoV-19/USA/WA-S145/2020    | North America / USA / Washington / King County      | 2020-03-15 | Washington State Department of Health Seattle Flu Study Chu et al                                                                                                                                                                                                                                                                                |
| EPI_ISL_430183                                                                                                                                                                                          | hCoV-19/USA/WA-S146/2020    | North America / USA / Washington / King County      | 2020-03-14 | Washington State Department of Health Seattle Flu Study Chu et al                                                                                                                                                                                                                                                                                |
| EPI_ISL_430184                                                                                                                                                                                          | hCoV-19/USA/WA-S147/2020    | North America / USA / Washington / King County      | 2020-03-14 | Washington State Department of Health Seattle Flu Study Chu et al                                                                                                                                                                                                                                                                                |
| EPI_ISL_430185                                                                                                                                                                                          | hCoV-19/USA/WA-S148/2020    | North America / USA / Washington / King County      | 2020-03-13 | Washington State Department of Health Seattle Flu Study Chu et al                                                                                                                                                                                                                                                                                |
| EPI_ISL_430186                                                                                                                                                                                          | hCoV-19/USA/WA-S149/2020    | North America / USA / Washington / King County      | 2020-03-14 | Washington State Department of Health Seattle Flu Study Chu et al                                                                                                                                                                                                                                                                                |
| EPI_ISL_430187                                                                                                                                                                                          | hCoV-19/USA/WA-S150/2020    | North America / USA / Washington / King County      | 2020-03-14 | Washington State Department of Health Seattle Flu Study Chu et al                                                                                                                                                                                                                                                                                |
| EPI_ISL_430188                                                                                                                                                                                          | hCoV-19/USA/WA-S151/2020    | North America / USA / Washington / Snohomish County | 2020-03-16 | Washington State Department of Health Seattle Flu Study Chu et al                                                                                                                                                                                                                                                                                |
| EPI_ISL_430189                                                                                                                                                                                          | hCoV-19/USA/WA-S152/2020    | North America / USA / Washington / King County      | 2020-03-16 | Washington State Department of Health Seattle Flu Study Chu et al                                                                                                                                                                                                                                                                                |
| EPI_ISL_430190                                                                                                                                                                                          | hCoV-19/USA/WA-S153/2020    | North America / USA / Washington / King County      | 2020-03-16 | Washington State Department of Health Seattle Flu Study Chu et al                                                                                                                                                                                                                                                                                |
| EPI_ISL_430191                                                                                                                                                                                          | hCoV-19/USA/WA-S154/2020    | North America / USA / Washington / King County      | 2020-03-16 | Washington State Department of Health Seattle Flu Study Chu et al                                                                                                                                                                                                                                                                                |
| EPI_ISL_430193                                                                                                                                                                                          | hCoV-19/USA/WA-S156/2020    | North America / USA / Washington / King County      | 2020-03-16 | Washington State Department of Health Seattle Flu Study Chu et al                                                                                                                                                                                                                                                                                |
| EPI_ISL_430196                                                                                                                                                                                          | hCoV-19/USA/WA-S158/2020    | North America / USA / Washington / Snohomish County | 2020-03-16 | Washington State Department of Health Seattle Flu Study Chu et al                                                                                                                                                                                                                                                                                |
| EPI_ISL_430197                                                                                                                                                                                          | hCoV-19/USA/WA-S159/2020    | North America / USA / Washington / Snohomish County | 2020-03-16 | Washington State Department of Health Seattle Flu Study Chu et al                                                                                                                                                                                                                                                                                |
| EPI_ISL_430198                                                                                                                                                                                          | hCoV-19/USA/WA-S160/2020    | North America / USA / Washington / King County      | 2020-03-17 | Washington State Department of Health Seattle Flu Study Chu et al                                                                                                                                                                                                                                                                                |
| EPI_ISL_430199                                                                                                                                                                                          | hCoV-19/USA/WA-S161/2020    | North America / USA / Washington / King County      | 2020-03-17 | Washington State Department of Health Seattle Flu Study Chu et al                                                                                                                                                                                                                                                                                |
| EPI_ISL_430200                                                                                                                                                                                          | hCoV-19/USA/WA-S162/2020    | North America / USA / Washington                    | 2020-03-04 | Washington State Department of Health Seattle Flu Study Chu et al                                                                                                                                                                                                                                                                                |
| EPI_ISL_430201                                                                                                                                                                                          | hCoV-19/USA/WA-S163/2020    | North America / USA / Washington                    | 2020-03-04 | Washington State Department of Health Seattle Flu Study Chu et al                                                                                                                                                                                                                                                                                |
| EPI_ISL_430202                                                                                                                                                                                          | hCoV-19/USA/WA-S164/2020    | North America / USA / Washington                    | 2020-03-02 | Washington State Department of Health Seattle Flu Study Chu et al                                                                                                                                                                                                                                                                                |
| EPI_ISL_430204                                                                                                                                                                                          | hCoV-19/USA/WA-S166/2020    | North America / USA / Washington / King County      | 2020-03-18 | Washington State Department of Health Seattle Flu Study Chu et al                                                                                                                                                                                                                                                                                |
| EPI_ISL_430205                                                                                                                                                                                          | hCoV-19/USA/WA-S167/2020    | North America / USA / Washington / Whatcom County   | 2020-03-18 | Washington State Department of Health Seattle Flu Study Chu et al                                                                                                                                                                                                                                                                                |
| EPI_ISL_430206                                                                                                                                                                                          | hCoV-19/USA/WA-S168/2020    | North America / USA / Washington / Whatcom County   | 2020-03-18 | Washington State Department of Health Seattle Flu Study Chu et al                                                                                                                                                                                                                                                                                |
| EPI_ISL_430207                                                                                                                                                                                          | hCoV-19/USA/WA-S169/2020    | North America / USA / Washington / Whatcom County   | 2020-03-18 | Washington State Department of Health Seattle Flu Study Chu et al                                                                                                                                                                                                                                                                                |
| EPI_ISL_430208                                                                                                                                                                                          | hCoV-19/USA/WA-S170/2020    | North America / USA / Washington / Yakima County    | 2020-03-17 | Washington State Department of Health Seattle Flu Study Chu et al                                                                                                                                                                                                                                                                                |
| EPI_ISL_430209                                                                                                                                                                                          | hCoV-19/USA/WA-S171/2020    | North America / USA / Washington                    | 2020-03-19 | Washington State Department of Health Seattle Flu Study Chu et al                                                                                                                                                                                                                                                                                |
| EPI_ISL_430210                                                                                                                                                                                          | hCoV-19/USA/WA-S172/2020    | North America / USA / Washington / King County      | 2020-03-19 | Washington State Department of Health Seattle Flu Study Chu et al                                                                                                                                                                                                                                                                                |
| EPI_ISL_430211                                                                                                                                                                                          | hCoV-19/USA/WA-S173/2020    | North America / USA / Washington                    | 2020-03-19 | Washington State Department of Health Seattle Flu Study Chu et al                                                                                                                                                                                                                                                                                |
| EPI_ISL_404227                                                                                                                                                                                          | hCoV-19/Zhejiang/WZ-01/2020 | Asia / China / Zhejiang                             | 2020-01-16 | Zhejiang Provincial Center for Disease Control and Prevention Department of Microbiology, Zhejiang Provincial Center for Disease Control and Prevention Yin Chen, Yanjun Zhang, Haiyan Mao, Junhang Pan, Xiuyu Lou, Yiyu Lu, Juying Yan, Hanping Zhu, Jian Gao, Yan Feng, Yi Sun, Hao Yan, Zhen Li, Yisheng Sun, Liming Gong, Qiong Ge, Wen Shi, |

Xinying Wang, Wenwu Yao, Zhangnv Yang, Fang Xu, Chen Chen, Enfu Chen, Zhen Wang, Zhiping Chen, Jianmin Jiang, Chonggao Hu  
 EPI\_ISL\_404228 hCoV-19/Zhejiang/WZ-02/2020 Asia / China / Zhejiang 2020-01-17 Zhejiang Provincial Center for Disease Control and Prevention Department of Microbiology, Zhejiang Provincial Center for Disease Control and Prevention Yanjun Zhang, Yin Chen, Haiyan Mao, Junhang Pan, Xiuyu Lou, Yiyu Lu, Juying Yan, Hanping Zhu, Jian Gao, Yan Feng, Yi Sun, Hao Yan, Zhen Li, Yisheng Sun, Liming Gong, Qiong Ge, Wen Shi, Xinying Wang, Wenwu Yao, Zhangnv Yang, Fang Xu, Chen Chen, Enfu Chen, Zhen Wang, Zhiping Chen, Jianmin Jiang, Chonggao Hu  
 EPI\_ISL\_404253 hCoV-19/USA/IL1/2020 North America / USA / Illinois / Chicago 2020-01-21 IL Department of Public Health Chicago Laboratory Pathogen Discovery, Respiratory Viruses Branch, Division of Viral Diseases, Centers for Diseases Control and Prevention Ying Tao, Krista Queen, Clinton R. Paden, Jing Zhang, Yan Li, Anna Uehara, Xiaoyan Lu, Brian Lynch, Senthil Kumar K. Sakthivel, Brett L. Whitaker, Shifaq Kamili, Lijuan Wang, Janna' R. Murray, Susan I. Gerber, Stephen Lindstrom, Suxiang Tong  
 EPI\_ISL\_406800 hCoV-19/Wuhan/WH03/2020 Asia / China / Hubei / Wuhan 2020-01-01 General Hospital of Central Theater Command of People's Liberation Army of China BGI & Institute of Microbiology, Chinese Academy of Sciences & Shandong First Medical University & Shandong Academy of Medical Sciences & General Hospital of Central Theater Command of People's Liberation Army of China Weijun Chen, Yuhai Bi, Weifeng Shi and Zhenhong Hu  
 EPI\_ISL\_406801 hCoV-19/Wuhan/WH04/2020 Asia / China / Hubei / Wuhan 2020-01-05 General Hospital of Central Theater Command of People's Liberation Army of China BGI & Institute of Microbiology, Chinese Academy of Sciences & Shandong First Medical University & Shandong Academy of Medical Sciences & General Hospital of Central Theater Command of People's Liberation Army of China Weijun Chen, Yuhai Bi, Weifeng Shi and Zhenhong Hu  
 EPI\_ISL\_408976 hCoV-19/Australia/NSW02/2020 Oceania / Australia / New South Wales / Sydney 2020-01-22 Centre for Infectious Diseases and Microbiology Laboratory Services NSW Health Pathology - Institute of Clinical Pathology and Medical Research; Westmead Hospital; University of Sydney Rockett R, Sadsad R, Eden J-S, Carter I, Rahman H, Holmes EC, O'Sullivan MV, Sintchenko V, Chen SC, Maddocks S, Kok J and Dwyer DE for the 2019-nCoV Study Group\*  
 EPI\_ISL\_408977 hCoV-19/Australia/NSW03/2020 Oceania / Australia / New South Wales / Sydney 2020-01-25 Serology, Virology and OTDS Laboratories (SAViD), NSW Health Pathology Randwick NSW Health Pathology - Institute of Clinical Pathology and Medical Research; Centre for Infectious Diseases and Microbiology Laboratory Services; Westmead Hospital; University of Sydney Eden J-S, Carter I, Rahman H, Rawlinson W, Holmes EC, Rockett R, O'Sullivan MV, Sintchenko V, Chen SC, Maddocks S, Kok J and Dwyer DE for the 2019-nCoV Study Group\*  
 EPI\_ISL\_412116 hCoV-19/England/09c/2020 Europe / United Kingdom / England 2020-02-09 Respiratory Virus Unit, Microbiology Services Colindale, Public Health England Respiratory Virus Unit, Microbiology Services Colindale, Public Health England Monica Galiano, Shahjahan Miah, Angie Lackenby, Omolola Akinbami, Tiina Talts, Leena Bhaw, Richard Myers, Steven Platt, Kirstin Edwards, Jonathan Hubb, Joanna Ellis, Maria Zambon  
 EPI\_ISL\_413455 hCoV-19/USA/WA4-UW2/2020 North America / USA / Washington 2020-02-28 Washington State Public Health Lab University of Washington Virology Lab Pavitra Roychoudhury, Arun Nalla, Hong Xie, Keith Jerome, Alexander Greninger  
 EPI\_ISL\_413456 hCoV-19/USA/WA-S2/2020 North America / USA / Washington / King County 2020-02-20 Seattle Flu Study Seattle Flu Study Chu et al  
 EPI\_ISL\_413457 hCoV-19/USA/WA6-UW3/2020 North America / USA / Washington 2020-02-29 Washington State Public Health Lab UW Virology Lab Pavitra Roychoudhury, Arun Nalla, Hong Xie, Keith Jerome, Alexander Greninger  
 EPI\_ISL\_413458 hCoV-19/USA/WA7-UW4/2020 North America / USA / Washington 2020-03-01 Washington State Public Health Lab UW Virology Lab Pavitra Roychoudhury, Arun Nalla, Hong Xie, Keith Jerome, Alexander Greninger  
 EPI\_ISL\_413459 hCoV-19/Japan/TK-20-31-3/2020 Asia / Japan / Tokyo 2020-02-20 Department of Pathology, Toshima Hospital Pathogen Genomics Center, National Institute of Infectious Diseases Tsuyoshi Sekizuka, Kentaro Itokawa, Takuya Adachi, Masahiro Sano, Jun Yamazaki, Ippei Miyamoto, Haruka Nishioka, Ja-Mun Chong, Noriko Nakajima, Yuko Sato, Minoru Tobiume, Harutaka Katano, Tadaki Suzuki, Makoto Kuroda  
 EPI\_ISL\_413486 hCoV-19/USA/WA8-UW5/2020 North America / USA / Washington 2020-03-01 Valley Medical Center University of Washington Virology Lab Pavitra Roychoudhury, Arun Nalla, Hong Xie, Keith Jerome, Alexander Greninger  
 EPI\_ISL\_413487 hCoV-19/USA/WA9-UW6/2020 North America / USA / Washington 2020-03-01 Harborview Medical Center University of Washington Virology Lab Pavitra Roychoudhury, Arun Nalla, Hong Xie, Keith Jerome, Alexander Greninger  
 EPI\_ISL\_413488 hCoV-19/Germany/NRW-01/2020 Europe / Germany / North Rhine Westphalia / Heinsberg District 2020-02-28 Center of Medical Microbiology, Virology, and Hospital Hygiene, University of Duesseldorf Center of Medical Microbiology, Virology, and Hospital Hygiene, University of Duesseldorf Ortwin Adams, Marcel Andree, Alexander Dilthey, Torsten Feldt, Sandra Hauka, Torsten Houwaart, Björn-Erik Jensen, Detlef Kindgen-Milles, Malte Kohns Vasconcelos, Klaus Pfeffer, Tina Senff, Daniel Strelow, Jörg Timm, Andreas Walker, Tobias Wienemann  
 EPI\_ISL\_413489 hCoV-19/Italy/UniSR1/2020 Europe / Italy / Lombardy / Milan 2020-03-03 Laboratorio di Microbiologia e Virologia, Università Vita-Salute San Raffaele, Milano Laboratorio di Microbiologia e Virologia, Università Vita-Salute San Raffaele, Milano R.A Diotti, E. Criscuolo, M. Castelli,

V. Caputo, R. Ferrarese, E. Boeri, I. Negri, V. Amato, G. Lo Raso, C. Di Resta, R. Burioni, M. Clementi, N. Mancini & N. Clementi

EPI\_ISL\_413490 hCoV-19/New Zealand/01/2020 Oceania / New Zealand / Auckland 2020-02-27  
Auckland Hospital Institute of Environmental Science and Research (ESR) Matt Storey, Xiaoyun Ren, Gary McAuliffe, Sally Roberts, Matthew Blakiston, Erasmus Smit, Lauren Jelly, Joep de Ligt

EPI\_ISL\_414616 hCoV-19/USA/WA-UW29/2020 North America / USA / Washington / Kirkland 2020-03-08  
UW Virology Lab UW Virology Lab Pavitra Roychoudhury, Hong Xie, Keith Jerome, Alexander Greninger

EPI\_ISL\_414617 hCoV-19/USA/WA-UW30/2020 North America / USA 2020-03-08 UW Virology Lab UW  
Virology Lab Pavitra Roychoudhury, Hong Xie, Keith Jerome, Alexander Greninger

EPI\_ISL\_414618 hCoV-19/USA/WA-UW31/2020 North America / USA 2020-03-08 UW Virology Lab UW  
Virology Lab Pavitra Roychoudhury, Hong Xie, Keith Jerome, Alexander Greninger

EPI\_ISL\_414619 hCoV-19/USA/WA-UW32/2020 North America / USA 2020-03-07 UW Virology Lab UW  
Virology Lab Pavitra Roychoudhury, Hong Xie, Keith Jerome, Alexander Greninger

EPI\_ISL\_414621 hCoV-19/USA/WA-UW34/2020 North America / USA / Washington 2020-03-07 UW  
Virology Lab UW Virology Lab Pavitra Roychoudhury, Hong Xie, Keith Jerome, Alexander Greninger

EPI\_ISL\_414622 hCoV-19/USA/WA-UW35/2020 North America / USA / Washington / Seattle 2020-03-08  
UW Virology Lab UW Virology Lab Pavitra Roychoudhury, Hong Xie, Keith Jerome, Alexander Greninger

EPI\_ISL\_414623 hCoV-19/France/GE1583/2020 Europe / France / Grand-Est / Strasbourg 2020-02-25  
Laboratoire de Virologie Institut de Virologie - INSERM U 1109 Hôpitaux Universitaires de Strasbourg  
National Reference Center for Viruses of Respiratory Infections, Institut Pasteur, Paris Mélnie Albert,  
Marion Barbet, Sylvie Behillil, Méline Bizard, Angela Brisebarre, Flora Donati Vincent Enouf, Maud Vanpeene,  
Sylvie van der Werf, Samira Fafi-Kremer

EPI\_ISL\_414624 hCoV-19/France/N1620/2020 Europe / France / Normandie / Rouen 2020-02-26 Centre  
Hospitalier Universitaire de Rouen Laboratoire de Virologie National Reference Center for Viruses of  
Respiratory Infections, Institut Pasteur, Paris Mélnie Albert, Marion Barbet, Sylvie Behillil, Méline Bizard,  
Angela Brisebarre, Flora Donati Vincent Enouf, Maud Vanpeene, Sylvie van der Werf, Jean-Christophe Plantier

EPI\_ISL\_414636 hCoV-19/France/HF1989/2020 Europe / France / Hauts de France / Compiègne 2020-03-04  
Centre Hospitalier Compiègne Laboratoire de Biologie National Reference Center for Viruses of Respiratory  
Infections, Institut Pasteur, Paris Mélnie Albert, Marion Barbet, Sylvie Behillil, Méline Bizard, Angela  
Brisebarre, Flora Donati Vincent Enouf, Maud Vanpeene, Sylvie van der Werf, Raulin Olivia

EPI\_ISL\_414637 hCoV-19/France/HF1993/2020 Europe / France / Hauts de France / Compiègne 2020-03-04  
Centre Hospitalier Compiègne Laboratoire de Biologie National Reference Center for Viruses of Respiratory  
Infections, Institut Pasteur, Paris Mélnie Albert, Marion Barbet, Sylvie Behillil, Méline Bizard, Angela  
Brisebarre, Flora Donati Vincent Enouf, Maud Vanpeene, Sylvie van der Werf, Raulin Olivia

EPI\_ISL\_414638 hCoV-19/France/HF1995/2020 Europe / France / Hauts de France / Compiègne 2020-03-04  
Centre Hospitalier Compiègne Laboratoire de Biologie National Reference Center for Viruses of Respiratory  
Infections, Institut Pasteur, Paris Mélnie Albert, Marion Barbet, Sylvie Behillil, Méline Bizard, Angela  
Brisebarre, Flora Donati Vincent Enouf, Maud Vanpeene, Sylvie van der Werf, Raulin Olivia

EPI\_ISL\_414641 hCoV-19/Finland/FIN-313/2020 Europe / Finland 2020-03-05 Department of Virology  
and Immunology, University of Helsinki and Helsinki University Hospital, Huslab Finland Department of Virology,  
Faculty of Medicine, University of Helsinki, Helsinki, Finland Teemu Smura, Hannimari Kallio-Kokko, Olli  
Vapalahti

EPI\_ISL\_414642 hCoV-19/Finland/FIN-455/2020 Europe / Finland 2020-03-08 Department of Virology  
and Immunology, University of Helsinki and Helsinki University Hospital, Huslab Finland Department of Virology,  
Faculty of Medicine, University of Helsinki, Helsinki, Finland Teemu Smura, Hannimari Kallio-Kokko, Olli  
Vapalahti

EPI\_ISL\_414643 hCoV-19/Finland/FIN-508/2020 Europe / Finland 2020-03-07 Department of Virology  
and Immunology, University of Helsinki and Helsinki University Hospital, Huslab Finland Department of Virology,  
Faculty of Medicine, University of Helsinki, Helsinki, Finland Teemu Smura, Hannimari Kallio-Kokko, Olli  
Vapalahti

EPI\_ISL\_414646 hCoV-19/Finland/FIN-266/2020 Europe / Finland 2020-03-04 Department of Virology  
and Immunology, University of Helsinki and Helsinki University Hospital, Huslab Finland Department of Virology,  
Faculty of Medicine, University of Helsinki, Helsinki, Finland Teemu Smura, Hannimari Kallio-Kokko, Olli  
Vapalahti

EPI\_ISL\_414648 hCoV-19/USA/CA-PC101P/2020 North America / USA / California / San Diego County 2020-  
03-11 Andersen Lab, The Scripps Research Institute Andersen Lab, The Scripps Research Institute Mark  
Zeller, Catie Anderson, Emily Spender, Sarah Topol, Raphaelle Klitting, Refugio Robles-Sikisaka, Karthik  
Gangavarapu, Laura Nicholson, Kristian Andersen

EPI\_ISL\_417004 hCoV-19/Belgium/ULG-3000/2020 Europe / Belgium / Liège 2020-03-05 Department of  
Clinical Microbiology GIGA Medical Genomics Durkin Keith, Artesi Maria, Bontems Sébastien, Boreux Raphaël,  
Meex Cécile, Melin Pierrette, Hayette Marie-Pierre, Bours Vincent.

EPI\_ISL\_417006 hCoV-19/Belgium/ULG-3163/2020 Europe / Belgium / Liège 2020-03-05 Department of  
Clinical Microbiology GIGA Medical Genomics Durkin Keith, Artesi Maria, Bontems Sébastien, Boreux Raphaël,  
Meex Cécile, Melin Pierrette, Hayette Marie-Pierre, Bours Vincent.

EPI\_ISL\_417007 hCoV-19/Spain/Galicia201663/2020 Europe / Spain / Galicia 2020-03-07  
HOSPITAL SANTA MARIA NAI Instituto de Salud Carlos III Iglesias-Caballero, M. Molinero Calamita, M.  
González-Esguevillas, M. Camarero S. Pozo F. Casas I. Jiménez, P. Jiménez, M. Zaballo, A. Monzón, S. Varona,  
S. Juliá, M. Cuesta, I. García Costa, J.

EPI\_ISL\_417008 hCoV-19/Belgium/ULG-3662/2020 Europe / Belgium / Liège 2020-03-07 Department of  
Clinical Microbiology GIGA Medical Genomics Durkin Keith, Artesi Maria, Bontems Sébastien, Boreux Raphaël,

Meex Cécile, Melin Pierrette, Hayette Marie-Pierre, Bours Vincent.  
EPI\_ISL\_417009 hCoV-19/Belgium/ULG-3665/2020 Europe / Belgium / Liège 2020-03-07 Department of Clinical Microbiology GIGA Medical Genomics Durkin Keith, Artesi Maria, Bontems Sébastien, Boreux Raphaël, Meex Cécile, Melin Pierrette, Hayette Marie-Pierre, Bours Vincent.

EPI\_ISL\_417010 hCoV-19/Spain/Madrid201442/2020 Europe / Spain / Madrid 2020-03-04 FUNDACION JIMENEZ DIAZ Instituto de Salud Carlos III Iglesias-Caballero, M. Molinero Calamita, M. González-Esguevillas, M. Camarero, S. Pozo, F. Casas, I. Jiménez, P. Jiménez, M. Zaballos, A. Monzón, S. Varona, S. Juliá, M. Cuesta, I. Fernández Roblas, R.

EPI\_ISL\_417012 hCoV-19/Belgium/ULG-3843/2020 Europe / Belgium / Liège 2020-03-08 Department of Clinical Microbiology GIGA Medical Genomics Durkin Keith, Artesi Maria, Bontems Sébastien, Boreux Raphaël, Meex Cécile, Melin Pierrette, Hayette Marie-Pierre, Bours Vincent.

EPI\_ISL\_417013 hCoV-19/Belgium/ULG-4163/2020 Europe / Belgium / Liège 2020-03-09 Department of Clinical Microbiology GIGA Medical Genomics Durkin Keith, Artesi Maria, Bontems Sébastien, Boreux Raphaël, Meex Cécile, Melin Pierrette, Hayette Marie-Pierre, Bours Vincent.

EPI\_ISL\_417014 hCoV-19/Belgium/ULG-6216/2020 Europe / Belgium / Liège 2020-03-13 Department of Clinical Microbiology GIGA Medical Genomics Durkin Keith, Artesi Maria, Bontems Sébastien, Boreux Raphaël, Meex Cécile, Melin Pierrette, Hayette Marie-Pierre, Bours Vincent.

EPI\_ISL\_417015 hCoV-19/Belgium/ULG-6457/2020 Europe / Belgium / Liège 2020-03-13 Department of Clinical Microbiology GIGA Medical Genomics Durkin Keith, Artesi Maria, Bontems Sébastien, Boreux Raphaël, Meex Cécile, Melin Pierrette, Hayette Marie-Pierre, Bours Vincent.

EPI\_ISL\_417016 hCoV-19/Belgium/ULG-6503/2020 Europe / Belgium / Liège 2020-03-13 Department of Clinical Microbiology GIGA Medical Genomics Durkin Keith, Artesi Maria, Bontems Sébastien, Boreux Raphaël, Meex Cécile, Melin Pierrette, Hayette Marie-Pierre, Bours Vincent.

EPI\_ISL\_417017 hCoV-19/Belgium/ULG-6638/2020 Europe / Belgium / Liège 2020-03-14 Department of Clinical Microbiology GIGA Medical Genomics Durkin Keith, Artesi Maria, Bontems Sébastien, Boreux Raphaël, Meex Cécile, Melin Pierrette, Hayette Marie-Pierre, Bours Vincent.

EPI\_ISL\_417018 hCoV-19/Belgium/ULG-6670/2020 Europe / Belgium / Liège 2020-03-14 Department of Clinical Microbiology GIGA Medical Genomics Durkin Keith, Artesi Maria, Bontems Sébastien, Boreux Raphaël, Meex Cécile, Melin Pierrette, Hayette Marie-Pierre, Bours Vincent.

EPI\_ISL\_417019 hCoV-19/Belgium/ULG-6754/2020 Europe / Belgium / Liège 2020-03-14 Department of Clinical Microbiology GIGA Medical Genomics Durkin Keith, Artesi Maria, Bontems Sébastien, Boreux Raphaël, Meex Cécile, Melin Pierrette, Hayette Marie-Pierre, Bours Vincent.

EPI\_ISL\_417020 hCoV-19/Belgium/ULG-6939/2020 Europe / Belgium / Liège 2020-03-15 Department of Clinical Microbiology GIGA Medical Genomics Durkin Keith, Artesi Maria, Bontems Sébastien, Boreux Raphaël, Meex Cécile, Melin Pierrette, Hayette Marie-Pierre, Bours Vincent.

EPI\_ISL\_417021 hCoV-19/Belgium/ULG-6942/2020 Europe / Belgium / Liège 2020-03-15 Department of Clinical Microbiology GIGA Medical Genomics Durkin Keith, Artesi Maria, Bontems Sébastien, Boreux Raphaël, Meex Cécile, Melin Pierrette, Hayette Marie-Pierre, Bours Vincent.

EPI\_ISL\_417022 hCoV-19/Belgium/ULG-6948/2020 Europe / Belgium / Liège 2020-03-15 Department of Clinical Microbiology GIGA Medical Genomics Durkin Keith, Artesi Maria, Bontems Sébastien, Boreux Raphaël, Meex Cécile, Melin Pierrette, Hayette Marie-Pierre, Bours Vincent.

EPI\_ISL\_417023 hCoV-19/Belgium/ULG-6950/2020 Europe / Belgium / Liège 2020-03-15 Department of Clinical Microbiology GIGA Medical Genomics Durkin Keith, Artesi Maria, Bontems Sébastien, Boreux Raphaël, Meex Cécile, Melin Pierrette, Hayette Marie-Pierre, Bours Vincent.

EPI\_ISL\_417025 hCoV-19/Belgium/ULG-7019/2020 Europe / Belgium / Liège 2020-03-15 Department of Clinical Microbiology GIGA Medical Genomics Durkin Keith, Artesi Maria, Bontems Sébastien, Boreux Raphaël, Meex Cécile, Melin Pierrette, Hayette Marie-Pierre, Bours Vincent.

EPI\_ISL\_417026 hCoV-19/USA/UT-08/2020 North America / USA / Utah 2020-03-20 Utah Public Health Laboratory Utah Public Health Laboratory Erin Young, Kelly Oakeson

EPI\_ISL\_417028 hCoV-19/USA/UT-020/2020 North America / USA / Utah 2020-03-20 Utah Public Health Laboratory Utah Public Health Laboratory Erin Young, Kelly Oakeson

EPI\_ISL\_417030 hCoV-19/Australia/NSW04/2020 Oceania / Australia / New South Wales / Sydney 2020-01-24 Centre for Infectious Diseases and Microbiology Laboratory Services NSW Health Pathology - Institute of Clinical Pathology and Medical Research; Westmead Hospital; University of Sydney Edén J-S, Rockett R, Carter I, Rahman H, Holmes EC, O'Sullivan MV, Sintchenko V, Chen SC, Maddocks S, Kok J and Dwyer DE for the 2019-nCoV Study Group\*

EPI\_ISL\_417031 hCoV-19/Australia/QLDID919/2020 Oceania / Australia / Queensland / Gold Coast 2020-03-11 Pathology Queensland Public Health Virology Laboratory Bixing Huang, Alyssa Pyke, Amanda De Jong, Andrew Van Den Hurk, Carmel Taylor, David Warrilow, Doris Genge, Elisabeth Gamez, Glen Hewitson, Ian Maxwell Mackay, Inga Sultana, Jamie McMahon, Jean Barcelon, Judy Northill, Mitchell Finger, Natalie Simpson, Neelima Nair, Peter Burtonclay, Peter Moore, Sarah Wheatley, Sean Moody, Sonja Hall-Mendelin, Timothy Gardam, and Frederick Moore

EPI\_ISL\_417032 hCoV-19/Australia/QLDID920/2020 Oceania / Australia / Queensland / Rockhampton 2020-03-11 Rockhampton Base Hospital Public Health Virology Laboratory Bixing Huang, Alyssa Pyke, Amanda De Jong, Andrew Van Den Hurk, Carmel Taylor, David Warrilow, Doris Genge, Elisabeth Gamez, Glen Hewitson, Ian Maxwell Mackay, Inga Sultana, Jamie McMahon, Jean Barcelon, Judy Northill, Mitchell Finger, Natalie Simpson, Neelima Nair, Peter Burtonclay, Peter Moore, Sarah Wheatley, Sean Moody, Sonja Hall-Mendelin, Timothy Gardam, and Frederick Moore

EPI\_ISL\_417033 hCoV-19/Australia/QLDID921/2020 Oceania / Australia / Queensland / Brisbane 2020-03-11 Sullivan Nicolaides Pathology Public Health Virology Laboratory Bixing Huang, Alyssa Pyke, Amanda De



|                                                                                                                                                                                                                                                                                                                                                           |                                     |                                                     |            |                                                                                                                    |                                                                                                                    |
|-----------------------------------------------------------------------------------------------------------------------------------------------------------------------------------------------------------------------------------------------------------------------------------------------------------------------------------------------------------|-------------------------------------|-----------------------------------------------------|------------|--------------------------------------------------------------------------------------------------------------------|--------------------------------------------------------------------------------------------------------------------|
| Jong, Andrew Van Den Hurk, Carmel Taylor, David Warrilow, Doris Genge, Elisabeth Gamez, Glen Hewitson, Ian Maxwell Mackay, Inga Sultana, Jamie McMahon, Jean Barcelon, Judy Northill, Mitchell Finger, Natalie Simpson, Neelima Nair, Peter Burtonclay, Peter Moore, Sarah Wheatley, Sean Moody, Sonja Hall-Mendelin, Timothy Gardam, and Frederick Moore |                                     |                                                     |            |                                                                                                                    |                                                                                                                    |
| EPI_ISL_417034                                                                                                                                                                                                                                                                                                                                            | hCoV-19/Brazil/AMBR-02/2020         | South America / Brazil / Amazonas State / Manaus    | 2020-03-16 | Laboratorio de Ecologia de Doencas Transmissiveis na Amazonia, Instituto Leonidas e Maria Deane - Fiocruz Amazonia | Laboratorio de Ecologia de Doencas Transmissiveis na Amazonia, Instituto Leonidas e Maria Deane - Fiocruz Amazonia |
| EPI_ISL_417064                                                                                                                                                                                                                                                                                                                                            | hCoV-19/Hong Kong/VB20017970-2/2020 | Asia / Hong Kong                                    | 2020-01-21 | Hong Kong Department of Health                                                                                     | Alan K.L. Tsang, Peter C.W. Yip, Edman T.K. Lam, Rickjason C.W. Chan, Dominic N.C. Tsang                           |
| EPI_ISL_417065                                                                                                                                                                                                                                                                                                                                            | hCoV-19/USA/WA-S12/2020             | North America / USA / Washington                    | 2020-03-03 | State Department of Health                                                                                         | Seattle Flu Study                                                                                                  |
| EPI_ISL_417066                                                                                                                                                                                                                                                                                                                                            | hCoV-19/USA/WA-S13/2020             | North America / USA / Washington / King County      | 2020-03-03 | Washington State Department of Health                                                                              | Seattle Flu Study                                                                                                  |
| EPI_ISL_417068                                                                                                                                                                                                                                                                                                                                            | hCoV-19/USA/WA-S15/2020             | North America / USA / Washington / King County      | 2020-03-02 | Washington State Department of Health                                                                              | Seattle Flu Study                                                                                                  |
| EPI_ISL_417069                                                                                                                                                                                                                                                                                                                                            | hCoV-19/USA/WA-S16/2020             | North America / USA / Washington                    | 2020-03-03 | State Department of Health                                                                                         | Seattle Flu Study                                                                                                  |
| EPI_ISL_417070                                                                                                                                                                                                                                                                                                                                            | hCoV-19/USA/WA-S17/2020             | North America / USA / Washington / King County      | 2020-03-03 | Washington State Department of Health                                                                              | Seattle Flu Study                                                                                                  |
| EPI_ISL_417071                                                                                                                                                                                                                                                                                                                                            | hCoV-19/USA/WA-S18/2020             | North America / USA / Washington / King County      | 2020-03-03 | Washington State Department of Health                                                                              | Seattle Flu Study                                                                                                  |
| EPI_ISL_417072                                                                                                                                                                                                                                                                                                                                            | hCoV-19/USA/WA-S19/2020             | North America / USA / Washington / King County      | 2020-03-02 | Washington State Department of Health                                                                              | Seattle Flu Study                                                                                                  |
| EPI_ISL_417073                                                                                                                                                                                                                                                                                                                                            | hCoV-19/USA/WA-S20/2020             | North America / USA / Washington                    | 2020-03-02 | State Department of Health                                                                                         | Seattle Flu Study                                                                                                  |
| EPI_ISL_417074                                                                                                                                                                                                                                                                                                                                            | hCoV-19/USA/WA-S21/2020             | North America / USA / Washington / King County      | 2020-03-02 | Washington State Department of Health                                                                              | Seattle Flu Study                                                                                                  |
| EPI_ISL_417075                                                                                                                                                                                                                                                                                                                                            | hCoV-19/USA/WA-S22/2020             | North America / USA / Washington / Snohomish County | 2020-03-02 | Washington State Department of Health                                                                              | Seattle Flu Study                                                                                                  |
| EPI_ISL_417076                                                                                                                                                                                                                                                                                                                                            | hCoV-19/USA/WA-S23/2020             | North America / USA / Washington / Snohomish County | 2020-03-02 | Washington State Department of Health                                                                              | Seattle Flu Study                                                                                                  |
| EPI_ISL_417077                                                                                                                                                                                                                                                                                                                                            | hCoV-19/USA/WA-S24/2020             | North America / USA / Washington / Snohomish County | 2020-03-02 | Washington State Department of Health                                                                              | Seattle Flu Study                                                                                                  |
| EPI_ISL_417079                                                                                                                                                                                                                                                                                                                                            | hCoV-19/USA/WA-S26/2020             | North America / USA / Washington / Snohomish County | 2020-03-02 | Washington State Department of Health                                                                              | Seattle Flu Study                                                                                                  |
| EPI_ISL_417081                                                                                                                                                                                                                                                                                                                                            | hCoV-19/USA/WA-S28/2020             | North America / USA / Washington / Snohomish County | 2020-03-02 | Washington State Department of Health                                                                              | Seattle Flu Study                                                                                                  |
| EPI_ISL_417082                                                                                                                                                                                                                                                                                                                                            | hCoV-19/USA/WA-S29/2020             | North America / USA / Washington / Grant County     | 2020-03-02 | Washington State Department of Health                                                                              | Seattle Flu Study                                                                                                  |
| EPI_ISL_417085                                                                                                                                                                                                                                                                                                                                            | hCoV-19/USA/WA-S32/2020             | North America / USA / Washington / Snohomish County | 2020-03-02 | Washington State Department of Health                                                                              | Seattle Flu Study                                                                                                  |
| EPI_ISL_417086                                                                                                                                                                                                                                                                                                                                            | hCoV-19/USA/WA-S33/2020             | North America / USA / Washington / Clark County     | 2020-03-01 | Washington State Department of Health                                                                              | Seattle Flu Study                                                                                                  |
| EPI_ISL_417087                                                                                                                                                                                                                                                                                                                                            | hCoV-19/USA/WA-S34/2020             | North America / USA / Washington                    | 2020-03-02 | State Department of Health                                                                                         | Seattle Flu Study                                                                                                  |
| EPI_ISL_417088                                                                                                                                                                                                                                                                                                                                            | hCoV-19/USA/WA-S35/2020             | North America / USA / Washington                    | 2020-03-02 | State Department of Health                                                                                         | Seattle Flu Study                                                                                                  |
| EPI_ISL_417089                                                                                                                                                                                                                                                                                                                                            | hCoV-19/USA/WA-S36/2020             | North America / USA / Washington                    | 2020-03-02 | State Department of Health                                                                                         | Seattle Flu Study                                                                                                  |
| EPI_ISL_417500                                                                                                                                                                                                                                                                                                                                            | hCoV-19/USA/MN56-MDH56/2020         | North America / USA / Minnesota                     | 2020-03-14 | Department of Health, Public Health Laboratory                                                                     | Minnesota Department of Health, Public Health Laboratory                                                           |
| EPI_ISL_417501                                                                                                                                                                                                                                                                                                                                            | hCoV-19/USA/MN57-MDH57/2020         | North America / USA / Minnesota                     | 2020-03-14 | Department of Health, Public Health Laboratory                                                                     | Minnesota Department of Health, Public Health Laboratory                                                           |
| EPI_ISL_417502                                                                                                                                                                                                                                                                                                                                            | hCoV-19/USA/MN58-MDH58/2020         | North America / USA / Minnesota                     | 2020-03-14 | Department of Health, Public Health Laboratory                                                                     | Minnesota Department of Health, Public Health Laboratory                                                           |
| EPI_ISL_417503                                                                                                                                                                                                                                                                                                                                            | hCoV-19/USA/MN59-MDH59/2020         | North America / USA / Minnesota                     | 2020-03-14 | Department of Health, Public Health Laboratory                                                                     | Minnesota Department of Health, Public Health Laboratory                                                           |
| EPI_ISL_417504                                                                                                                                                                                                                                                                                                                                            | hCoV-19/USA/WI-UW-15/2020           | North America / USA / Wisconsin                     | 2020-03-16 | Wisconsin-Madison AIDS Vaccine Research Laboratories                                                               | University of Wisconsin-Madison AIDS Vaccine Research Laboratories                                                 |
| EPI_ISL_417505                                                                                                                                                                                                                                                                                                                                            | hCoV-19/USA/WI-UW-11/2020           | North America / USA / Wisconsin                     | 2020-03-15 | Wisconsin-Madison AIDS Vaccine Research Laboratories                                                               | University of Wisconsin-Madison AIDS Vaccine Research Laboratories                                                 |

|                |                                    |                                 |            |                                                                    |
|----------------|------------------------------------|---------------------------------|------------|--------------------------------------------------------------------|
| EPI_ISL_417506 | hCoV-19/USA/WI-UW-12/2020          | North America / USA / Wisconsin | 2020-03-16 | University of Wisconsin-Madison AIDS Vaccine Research Laboratories |
| EPI_ISL_417529 | hCoV-19/Luxembourg/LNS5731562/2020 | Europe / Luxembourg             | 2020-03-18 | Laboratoire Nationale de Santé, Microbiology, Virology             |
| EPI_ISL_417530 | hCoV-19/Luxembourg/LNS2128808/2020 | Europe / Luxembourg             | 2020-03-18 | Laboratoire Nationale de Santé, Microbiology, Virology             |
| EPI_ISL_417531 | hCoV-19/Luxembourg/LNS2013896/2020 | Europe / Luxembourg             | 2020-03-18 | Laboratoire Nationale de Santé, Microbiology, Virology             |
| EPI_ISL_417532 | hCoV-19/Luxembourg/LNS8489624/2020 | Europe / Luxembourg             | 2020-03-18 | Laboratoire Nationale de Santé, Microbiology, Virology             |
| EPI_ISL_417533 | hCoV-19/Luxembourg/LNS6282845/2020 | Europe / Luxembourg             | 2020-03-18 | Laboratoire Nationale de Santé, Microbiology, Virology             |
| EPI_ISL_417534 | hCoV-19/Luxembourg/LNS0158952/2020 | Europe / Luxembourg             | 2020-03-18 | Laboratoire Nationale de Santé, Microbiology, Virology             |
| EPI_ISL_417535 | hCoV-19/Iceland/1/2020             | Europe / Iceland / Reykjavik    | 2020-03-13 | deCODE genetics                                                    |
| EPI_ISL_417536 | hCoV-19/Iceland/10/2020            | Europe / Iceland / Reykjavik    | 2020-03-16 | deCODE genetics                                                    |
| EPI_ISL_417537 | hCoV-19/Iceland/100/2020           | Europe / Iceland / Reykjavik    | 2020-03-16 | deCODE genetics                                                    |
| EPI_ISL_417538 | hCoV-19/Iceland/104/2020           | Europe / Iceland / Reykjavik    | 2020-03-17 | deCODE genetics                                                    |
| EPI_ISL_417539 | hCoV-19/Iceland/11/2020            | Europe / Iceland / Reykjavik    | 2020-03-16 | deCODE genetics                                                    |

Anke Wienecke-Baldacchino, Ardashel Latsuzbaia, Jessica Tapp, Catherine Ragimbeau, Guillaume Fournier, Tamir Abdelrahman, Trung Nguyen Nguyen, Joel Mossong

Daniel F Gudbjartsson; Agnar Helgason; Hakon Jonsson; Olafur T Magnusson; Pall Melsted; Gudmundur L Norddahl; Jona Saemundsdottir; Asgeir Sigurdsson; Patrick Sulem; Arna B Agustsdottir; Berglind Eiriksdottir; Run Fridriksdottir; Elisabet E Gardarsdottir; Gudmundur Georgsson; Olafia S Gretarsdottir; Kjartan R Gudmundsson; Thora R Gunnarsdottir; Arnaldur Gylfason; Hilma Holm; Brynjar O Jensson; Aslaug Jonasdottir; Kamilla S Josefsdottir; Thordur Kristjansson; Droplaug N Magnusdottir; Louise le Roux; Gudrun Sigmundsdottir; Gardar Sveinbjornsson; Kristin E Sveinsdottir; Maney Sveinsdottir; Emil A Thorarensen; Bjarni Thorbjornsson; Gisli Masson; Ingileif Jonsdottir; Alma Moller; Thorolfur Gudnason; Karl G Kristinsson; Unnur Thorsteinsdottir; Kari Stefansson















S Gretarsdottir; Kjartan R Gudmundsson; Thora R Gunnarsdottir; Arnaldur Gylfason; Hilma Holm; Brynjar O  
Jensson; Aslaug Jonasdottir; Kamilla S Josefsdottir; Thordur Kristjansson; Droplaug N Magnusdottir; Louise le  
Roux; Gudrun Sigmundsdottir; Gardar Sveinbjornsson; Kristin E Sveinsdottir; Maney Sveinsdottir; Emil A  
Thorarensen; Bjarni Thorbjornsson; Gisli Masson; Ingileif Jonsdottir; Alma Moller; Thorolfur Gudnason; Karl G  
Kristinsson; Unnur Thorsteinsdottir; Kari Stefansson  
EPI\_ISL\_417595 hCoV-19/Iceland/267/2020 Europe / Iceland / Reykjavik 2020-03-17 The National  
University Hospital of Iceland deCODE genetics Daniel F Gudbjartsson; Agnar Helgason; Hakon Jonsson; Olafur T  
Magnusson; Pall Melsted; Gudmundur L Norddahl; Jona Saemundsdottir; Asgeir Sigurdsson; Patrick Sulem; Arna B  
Agustsdottir; Berglind Eiriksdottir; Run Fridriksdottir; Elisabet E Gardarsdottir; Gudmundur Georgsson; Olafia  
S Gretarsdottir; Kjartan R Gudmundsson; Thora R Gunnarsdottir; Arnaldur Gylfason; Hilma Holm; Brynjar O  
Jensson; Aslaug Jonasdottir; Kamilla S Josefsdottir; Thordur Kristjansson; Droplaug N Magnusdottir; Louise le  
Roux; Gudrun Sigmundsdottir; Gardar Sveinbjornsson; Kristin E Sveinsdottir; Maney Sveinsdottir; Emil A  
Thorarensen; Bjarni Thorbjornsson; Gisli Masson; Ingileif Jonsdottir; Alma Moller; Thorolfur Gudnason; Karl G  
Kristinsson; Unnur Thorsteinsdottir; Kari Stefansson  
EPI\_ISL\_417597 hCoV-19/Iceland/269/2020 Europe / Iceland / Reykjavik 2020-03-17 The National  
University Hospital of Iceland deCODE genetics Daniel F Gudbjartsson; Agnar Helgason; Hakon Jonsson; Olafur T  
Magnusson; Pall Melsted; Gudmundur L Norddahl; Jona Saemundsdottir; Asgeir Sigurdsson; Patrick Sulem; Arna B  
Agustsdottir; Berglind Eiriksdottir; Run Fridriksdottir; Elisabet E Gardarsdottir; Gudmundur Georgsson; Olafia  
S Gretarsdottir; Kjartan R Gudmundsson; Thora R Gunnarsdottir; Arnaldur Gylfason; Hilma Holm; Brynjar O  
Jensson; Aslaug Jonasdottir; Kamilla S Josefsdottir; Thordur Kristjansson; Droplaug N Magnusdottir; Louise le  
Roux; Gudrun Sigmundsdottir; Gardar Sveinbjornsson; Kristin E Sveinsdottir; Maney Sveinsdottir; Emil A  
Thorarensen; Bjarni Thorbjornsson; Gisli Masson; Ingileif Jonsdottir; Alma Moller; Thorolfur Gudnason; Karl G  
Kristinsson; Unnur Thorsteinsdottir; Kari Stefansson  
EPI\_ISL\_417598 hCoV-19/Iceland/270/2020 Europe / Iceland / Reykjavik 2020-03-17 The National  
University Hospital of Iceland deCODE genetics Daniel F Gudbjartsson; Agnar Helgason; Hakon Jonsson; Olafur T  
Magnusson; Pall Melsted; Gudmundur L Norddahl; Jona Saemundsdottir; Asgeir Sigurdsson; Patrick Sulem; Arna B  
Agustsdottir; Berglind Eiriksdottir; Run Fridriksdottir; Elisabet E Gardarsdottir; Gudmundur Georgsson; Olafia  
S Gretarsdottir; Kjartan R Gudmundsson; Thora R Gunnarsdottir; Arnaldur Gylfason; Hilma Holm; Brynjar O  
Jensson; Aslaug Jonasdottir; Kamilla S Josefsdottir; Thordur Kristjansson; Droplaug N Magnusdottir; Louise le  
Roux; Gudrun Sigmundsdottir; Gardar Sveinbjornsson; Kristin E Sveinsdottir; Maney Sveinsdottir; Emil A  
Thorarensen; Bjarni Thorbjornsson; Gisli Masson; Ingileif Jonsdottir; Alma Moller; Thorolfur Gudnason; Karl G  
Kristinsson; Unnur Thorsteinsdottir; Kari Stefansson  
EPI\_ISL\_418302 hCoV-19/England/SHEF-BFE9D/2020 Europe / United Kingdom / England / South Yorkshire 2020-  
03-24 Virology Department, Sheffield Teaching Hospitals NHS Foundation Trust Department of Infection,  
Immunity and Cardiovascular Disease, The Florey Institute, The Medical School, University of Sheffield Thushan  
de Silva, Matthew Parker, Adri Angyal, Rebecca Brown, Rachel Tucker, Paul Parsons, Danielle Groves, Alex  
Keeley, Dave Partridge, Matthew Wyles, Benjamin Lindsey, Mehmet Yavuz, Mohammad Raza, Cariad Evans  
EPI\_ISL\_418303 hCoV-19/England/SHEF-BFEAC/2020 Europe / United Kingdom / England / Derbyshire 2020-03-25  
Virology Department, Sheffield Teaching Hospitals NHS Foundation Trust Department of Infection, Immunity and  
Cardiovascular Disease, The Florey Institute, The Medical School, University of Sheffield Thushan de  
Silva, Matthew Parker, Adri Angyal, Rebecca Brown, Rachel Tucker, Paul Parsons, Danielle Groves, Alex Keeley,  
Dave Partridge, Matthew Wyles, Benjamin Lindsey, Mehmet Yavuz, Mohammad Raza, Cariad Evans  
EPI\_ISL\_418304 hCoV-19/England/SHEF-BFE8B/2020 Europe / United Kingdom / England / Derbyshire 2020-03-24  
Virology Department, Sheffield Teaching Hospitals NHS Foundation Trust Department of Infection, Immunity and  
Cardiovascular Disease, The Florey Institute, The Medical School, University of Sheffield Thushan de  
Silva, Matthew Parker, Adri Angyal, Rebecca Brown, Rachel Tucker, Paul Parsons, Danielle Groves, Alex Keeley,  
Dave Partridge, Matthew Wyles, Benjamin Lindsey, Mehmet Yavuz, Mohammad Raza, Cariad Evans  
EPI\_ISL\_418305 hCoV-19/England/SHEF-BFED9/2020 Europe / United Kingdom / England / South Yorkshire 2020-  
03-25 Virology Department, Sheffield Teaching Hospitals NHS Foundation Trust Department of Infection,  
Immunity and Cardiovascular Disease, The Florey Institute, The Medical School, University of Sheffield Thushan  
de Silva, Matthew Parker, Adri Angyal, Rebecca Brown, Rachel Tucker, Paul Parsons, Danielle Groves, Alex  
Keeley, Dave Partridge, Matthew Wyles, Benjamin Lindsey, Mehmet Yavuz, Mohammad Raza, Cariad Evans  
EPI\_ISL\_418306 hCoV-19/England/SHEF-BFE8/2020 Europe / United Kingdom / England / South Yorkshire 2020-  
03-25 Virology Department, Sheffield Teaching Hospitals NHS Foundation Trust Department of Infection,  
Immunity and Cardiovascular Disease, The Florey Institute, The Medical School, University of Sheffield Thushan  
de Silva, Matthew Parker, Adri Angyal, Rebecca Brown, Rachel Tucker, Paul Parsons, Danielle Groves, Alex  
Keeley, Dave Partridge, Matthew Wyles, Benjamin Lindsey, Mehmet Yavuz, Mohammad Raza, Cariad Evans  
EPI\_ISL\_418307 hCoV-19/England/SHEF-BFF03/2020 Europe / United Kingdom / England / Derbyshire 2020-03-24  
Virology Department, Sheffield Teaching Hospitals NHS Foundation Trust Department of Infection, Immunity and  
Cardiovascular Disease, The Florey Institute, The Medical School, University of Sheffield Thushan de  
Silva, Matthew Parker, Adri Angyal, Rebecca Brown, Rachel Tucker, Paul Parsons, Danielle Groves, Alex Keeley,  
Dave Partridge, Matthew Wyles, Benjamin Lindsey, Mehmet Yavuz, Mohammad Raza, Cariad Evans  
EPI\_ISL\_418313 hCoV-19/England/SHEF-BFF6D/2020 Europe / United Kingdom / England / Derbyshire 2020-03-24  
Virology Department, Sheffield Teaching Hospitals NHS Foundation Trust Department of Infection, Immunity and  
Cardiovascular Disease, The Florey Institute, The Medical School, University of Sheffield Thushan de  
Silva, Matthew Parker, Adri Angyal, Rebecca Brown, Rachel Tucker, Paul Parsons, Danielle Groves, Alex Keeley,  
Dave Partridge, Matthew Wyles, Benjamin Lindsey, Mehmet Yavuz, Mohammad Raza, Cariad Evans  
EPI\_ISL\_418317 hCoV-19/England/SHEF-BFFA9/2020 Europe / United Kingdom / England / South Yorkshire 2020-  
03-23 Virology Department, Sheffield Teaching Hospitals NHS Foundation Trust Department of Infection,  
Immunity and Cardiovascular Disease, The Florey Institute, The Medical School, University of Sheffield Thushan







|                |                                 |                                                   |            |                                                                                                                |                                                                                                                                                                                                                                                                                                                                                                                                |
|----------------|---------------------------------|---------------------------------------------------|------------|----------------------------------------------------------------------------------------------------------------|------------------------------------------------------------------------------------------------------------------------------------------------------------------------------------------------------------------------------------------------------------------------------------------------------------------------------------------------------------------------------------------------|
| EPI_ISL_418388 | hCoV-19/Finland/13M29/2020      | Europe / Finland                                  | 2020-03-13 | Department of Virology and Immunology, University of Helsinki and Helsinki University Hospital, Huslab Finland | Teemu Smura, Hannimari Kallio-Kokko, Olli Vapalahti                                                                                                                                                                                                                                                                                                                                            |
| EPI_ISL_418389 | hCoV-19/Finland/13M3/2020       | Europe / Finland                                  | 2020-03-13 | Department of Virology and Immunology, University of Helsinki and Helsinki University Hospital, Huslab Finland | Teemu Smura, Hannimari Kallio-Kokko, Olli Vapalahti                                                                                                                                                                                                                                                                                                                                            |
| EPI_ISL_418390 | hCoV-19/Finland/13M33/2020      | Europe / Finland                                  | 2020-03-13 | Department of Virology and Immunology, University of Helsinki and Helsinki University Hospital, Huslab Finland | Teemu Smura, Hannimari Kallio-Kokko, Olli Vapalahti                                                                                                                                                                                                                                                                                                                                            |
| EPI_ISL_418391 | hCoV-19/Finland/13M57/2020      | Europe / Finland                                  | 2020-03-13 | Department of Virology and Immunology, University of Helsinki and Helsinki University Hospital, Huslab Finland | Teemu Smura, Hannimari Kallio-Kokko, Olli Vapalahti                                                                                                                                                                                                                                                                                                                                            |
| EPI_ISL_418392 | hCoV-19/Finland/13M58/2020      | Europe / Finland                                  | 2020-03-13 | Department of Virology and Immunology, University of Helsinki and Helsinki University Hospital, Huslab Finland | Teemu Smura, Hannimari Kallio-Kokko, Olli Vapalahti                                                                                                                                                                                                                                                                                                                                            |
| EPI_ISL_418393 | hCoV-19/Finland/13M60/2020      | Europe / Finland                                  | 2020-03-13 | Department of Virology and Immunology, University of Helsinki and Helsinki University Hospital, Huslab Finland | Teemu Smura, Hannimari Kallio-Kokko, Olli Vapalahti                                                                                                                                                                                                                                                                                                                                            |
| EPI_ISL_418394 | hCoV-19/Finland/13M64/2020      | Europe / Finland                                  | 2020-03-13 | Department of Virology and Immunology, University of Helsinki and Helsinki University Hospital, Huslab Finland | Teemu Smura, Hannimari Kallio-Kokko, Olli Vapalahti                                                                                                                                                                                                                                                                                                                                            |
| EPI_ISL_418395 | hCoV-19/Finland/13M65/2020      | Europe / Finland                                  | 2020-03-13 | Department of Virology and Immunology, University of Helsinki and Helsinki University Hospital, Huslab Finland | Teemu Smura, Hannimari Kallio-Kokko, Olli Vapalahti                                                                                                                                                                                                                                                                                                                                            |
| EPI_ISL_418396 | hCoV-19/Finland/13M69/2020      | Europe / Finland                                  | 2020-03-13 | Department of Virology and Immunology, University of Helsinki and Helsinki University Hospital, Huslab Finland | Teemu Smura, Hannimari Kallio-Kokko, Olli Vapalahti                                                                                                                                                                                                                                                                                                                                            |
| EPI_ISL_418397 | hCoV-19/Finland/13M77/2020      | Europe / Finland                                  | 2020-03-13 | Department of Virology and Immunology, University of Helsinki and Helsinki University Hospital, Huslab Finland | Teemu Smura, Hannimari Kallio-Kokko, Olli Vapalahti                                                                                                                                                                                                                                                                                                                                            |
| EPI_ISL_418399 | hCoV-19/Finland/13M82/2020      | Europe / Finland                                  | 2020-03-13 | Department of Virology and Immunology, University of Helsinki and Helsinki University Hospital, Huslab Finland | Teemu Smura, Hannimari Kallio-Kokko, Olli Vapalahti                                                                                                                                                                                                                                                                                                                                            |
| EPI_ISL_418800 | hCoV-19/Belgium/CS-031052/2020  | Europe / Belgium / Gierle                         | 2020-03-10 | KU Leuven, Clinical and Epidemiological Virology                                                               | KU Leuven, Clinical and Epidemiological Virology<br>Bert Vanmechelen, Joan Marti-Carreras, Tony Wawina, Piet Maes                                                                                                                                                                                                                                                                              |
| EPI_ISL_418801 | hCoV-19/Australia/QLDID923/2020 | Oceania / Australia / Queensland / Brisbane       | 2020-03-14 | Mater Pathology Public Health Virology Laboratory                                                              | Bixing Huang, Alyssa Pyke, Amanda De Jong, Andrew Van Den Hurk, Carmel Taylor, David Warrilow, Doris Genge, Elisabeth Gamez, Glen Hewitson, Ian Maxwell Mackay, Inga Sultana, Jamie McMahon, Jean Barcelon, Judy Northill, Mitchell Finger, Natalie Simpson, Neelima Nair, Peter Burtonclay, Peter Moore, Sarah Wheatley, Sean Moody, Sonja Hall-Mendelin, Timothy Gardam, and Frederick Moore |
| EPI_ISL_418802 | hCoV-19/Australia/QLDID924/2020 | Oceania / Australia / Queensland / Gold Coast     | 2020-03-18 | Pathology Queensland Public Health Virology Laboratory                                                         | Bixing Huang, Alyssa Pyke, Amanda De Jong, Andrew Van Den Hurk, Carmel Taylor, David Warrilow, Doris Genge, Elisabeth Gamez, Glen Hewitson, Ian Maxwell Mackay, Inga Sultana, Jamie McMahon, Jean Barcelon, Judy Northill, Mitchell Finger, Natalie Simpson, Neelima Nair, Peter Burtonclay, Peter Moore, Sarah Wheatley, Sean Moody, Sonja Hall-Mendelin, Timothy Gardam, and Frederick Moore |
| EPI_ISL_418803 | hCoV-19/Australia/QLDID925/2020 | Oceania / Australia / Queensland / Sunshine Coast | 2020-03-18 | Pathology Queensland Public Health Virology Laboratory                                                         | Bixing Huang, Alyssa Pyke, Amanda De Jong, Andrew Van Den Hurk, Carmel Taylor, David Warrilow, Doris Genge, Elisabeth Gamez, Glen Hewitson, Ian Maxwell Mackay, Inga Sultana, Jamie McMahon, Jean Barcelon, Judy Northill, Mitchell Finger, Natalie Simpson, Neelima Nair, Peter Burtonclay, Peter Moore, Sarah Wheatley, Sean Moody, Sonja Hall-Mendelin, Timothy Gardam, and Frederick Moore |
| EPI_ISL_418804 | hCoV-19/Australia/QLDID926/2020 | Oceania / Australia / Queensland / Sunshine Coast | 2020-03-18 | Pathology Queensland Public Health Virology Laboratory                                                         | Bixing Huang, Alyssa Pyke, Amanda De Jong, Andrew Van Den Hurk, Carmel Taylor, David Warrilow, Doris Genge, Elisabeth Gamez, Glen Hewitson, Ian Maxwell Mackay, Inga Sultana, Jamie McMahon, Jean Barcelon, Judy Northill, Mitchell Finger, Natalie Simpson, Neelima Nair, Peter Burtonclay, Peter Moore, Sarah Wheatley, Sean Moody, Sonja Hall-Mendelin, Timothy Gardam, and Frederick Moore |

|                                                                                                                                                                                                                                                                                                                                                                                                                                                       |                                    |                                             |            |                                                                                                                                                                                                                                                                                                                                                                                                                                                                                                                                                                                                                                                                                      |
|-------------------------------------------------------------------------------------------------------------------------------------------------------------------------------------------------------------------------------------------------------------------------------------------------------------------------------------------------------------------------------------------------------------------------------------------------------|------------------------------------|---------------------------------------------|------------|--------------------------------------------------------------------------------------------------------------------------------------------------------------------------------------------------------------------------------------------------------------------------------------------------------------------------------------------------------------------------------------------------------------------------------------------------------------------------------------------------------------------------------------------------------------------------------------------------------------------------------------------------------------------------------------|
| EPI_ISL_418805                                                                                                                                                                                                                                                                                                                                                                                                                                        | hCoV-19/2020030650/2020            | Europe / Belgium / Deinze                   | 2020-03-06 | KU Leuven, Bert                                                                                                                                                                                                                                                                                                                                                                                                                                                                                                                                                                                                                                                                      |
| Clinical and Epidemiological Virology KU Leuven, Clinical and Epidemiological Virology Vanmechelen, Joan Marti-Carreras, Tony Wawina, Piet Maes                                                                                                                                                                                                                                                                                                       |                                    |                                             |            |                                                                                                                                                                                                                                                                                                                                                                                                                                                                                                                                                                                                                                                                                      |
| EPI_ISL_418806                                                                                                                                                                                                                                                                                                                                                                                                                                        | hCoV-19/Belgium/BG-030551/2020     | Europe / Belgium / Beersel                  | 2020-03-05 | KU Leuven, Bert                                                                                                                                                                                                                                                                                                                                                                                                                                                                                                                                                                                                                                                                      |
| Clinical and Epidemiological Virology KU Leuven, Clinical and Epidemiological Virology Vanmechelen, Joan Marti-Carreras, Tony Wawina, Piet Maes                                                                                                                                                                                                                                                                                                       |                                    |                                             |            |                                                                                                                                                                                                                                                                                                                                                                                                                                                                                                                                                                                                                                                                                      |
| EPI_ISL_418807                                                                                                                                                                                                                                                                                                                                                                                                                                        | hCoV-19/Australia/QLDID927/2020    | Oceania / Australia / Queensland / Brisbane | 2020-03-19 |                                                                                                                                                                                                                                                                                                                                                                                                                                                                                                                                                                                                                                                                                      |
| Pathology Queensland Public Health Virology Laboratory Bixing Huang, Alyssa Pyke, Amanda De Jong, Andrew Van Den Hurk, Carmel Taylor, David Warrilow, Doris Genge, Elisabeth Gamez, Glen Hewitson, Ian Maxwell Mackay, Inga Sultana, Jamie McMahon, Jean Barcelon, Judy Northill, Mitchell Finger, Natalie Simpson, Neelima Nair, Peter Burtonclay, Peter Moore, Sarah Wheatley, Sean Moody, Sonja Hall-Mendelin, Timothy Gardam, and Frederick Moore |                                    |                                             |            |                                                                                                                                                                                                                                                                                                                                                                                                                                                                                                                                                                                                                                                                                      |
| EPI_ISL_418808                                                                                                                                                                                                                                                                                                                                                                                                                                        | hCoV-19/Australia/QLDID928/2020    | Oceania / Australia / Queensland / Brisbane | 2020-03-19 |                                                                                                                                                                                                                                                                                                                                                                                                                                                                                                                                                                                                                                                                                      |
| Pathology Queensland Public Health Virology Laboratory Bixing Huang, Alyssa Pyke, Amanda De Jong, Andrew Van Den Hurk, Carmel Taylor, David Warrilow, Doris Genge, Elisabeth Gamez, Glen Hewitson, Ian Maxwell Mackay, Inga Sultana, Jamie McMahon, Jean Barcelon, Judy Northill, Mitchell Finger, Natalie Simpson, Neelima Nair, Peter Burtonclay, Peter Moore, Sarah Wheatley, Sean Moody, Sonja Hall-Mendelin, Timothy Gardam, and Frederick Moore |                                    |                                             |            |                                                                                                                                                                                                                                                                                                                                                                                                                                                                                                                                                                                                                                                                                      |
| EPI_ISL_418809                                                                                                                                                                                                                                                                                                                                                                                                                                        | hCoV-19/Japan/UT-NCGM02/2020       | Asia / Japan / Tokyo                        | 2020-02-01 | University of Wisconsin - Madison: Influenza Research Institute University of Wisconsin Madison, AIDS Vaccine Research Laboratories Katarina Braun, Gage Moreno, Peter Halfmann, et al.                                                                                                                                                                                                                                                                                                                                                                                                                                                                                              |
| EPI_ISL_418811                                                                                                                                                                                                                                                                                                                                                                                                                                        | hCoV-19/Canada/NB_6/2020           | North America / Canada / New Brunswick      | 2020-03-12 | Dr. Georges-L.-Dumont University Hospital Centre National Microbiology Laboratory Anna Majer, Shari Tyson, Grace Seo, Philip Mabon, Natalie Knox, Morag Graham, Richard Garceau, Guillaume Desnoyers, Nathalie Bastien, Yan Li, Matthew Gilmour, Timothy Booth                                                                                                                                                                                                                                                                                                                                                                                                                       |
| EPI_ISL_418812                                                                                                                                                                                                                                                                                                                                                                                                                                        | hCoV-19/Canada/MB_8/2020           | North America / Canada / Manitoba           | 2020-03-12 | Cadham Provincial Laboratory National Microbiology Laboratory Anna Majer, Shari Tyson, Grace Seo, Philip Mabon, Natalie Knox, Morag Graham, Paul Van Caesele, Jared Bullard, David Alexander, Kerry Dust, Nathalie Bastien, Yan Li, Matthew Gilmour, Timothy Booth                                                                                                                                                                                                                                                                                                                                                                                                                   |
| EPI_ISL_418813                                                                                                                                                                                                                                                                                                                                                                                                                                        | hCoV-19/Canada/MB_10/2020          | North America / Canada / Manitoba           | 2020-03-13 | Cadham Provincial Laboratory National Microbiology Laboratory Anna Majer, Shari Tyson, Grace Seo, Philip Mabon, Natalie Knox, Morag Graham, Paul Van Caesele, Jared Bullard, David Alexander, Kerry Dust, Nathalie Bastien, Yan Li, Matthew Gilmour, Timothy Booth                                                                                                                                                                                                                                                                                                                                                                                                                   |
| EPI_ISL_418814                                                                                                                                                                                                                                                                                                                                                                                                                                        | hCoV-19/Canada/NS_13/2020          | North America / Canada / Nova Scotia        | 2020-03-13 | Queen Elizabeth II Health Science Centre National Microbiology Laboratory Anna Majer, Shari Tyson, Grace Seo, Philip Mabon, Natalie Knox, Morag Graham, Todd Hatchette, Jason LeBlanc, Nathalie Bastien, Yan Li, Matthew Gilmour, Timothy Booth                                                                                                                                                                                                                                                                                                                                                                                                                                      |
| EPI_ISL_418815                                                                                                                                                                                                                                                                                                                                                                                                                                        | hCoV-19/Hong Kong/HKPU36-0702/2020 | Asia / Hong Kong                            | 2020-02-09 | Department of Clinical Pathology, Pamela Youde Nethersole Eastern Hospital Department of Health Technology and Informatics, Faculty of Health and Social Science, The Hong Kong Polytechnic University Kenneth Siu-Sing LEUNG, Timothy Ting-Leung NG, Alan Ka-Lun WU, Miranda Chong-Yee YAU, Hiu-Yin LAO, Ming-Pan CHOI, Kingsley King-Gee TAM, Lam-Kwong LEE, Barry Kin-Chung WONG, Alex Yat-Man HO, Kam-Tong YIP, Kwok-Cheung LUNG, Raymond Wai-To LIU, Eugene Yuk-Keung TSO, Wai-Shing LEUNG, Man-Chun CHAN, Yuk-Yung NG, Kit-Man SIN, Kitty Sau-Chun FUNG, Sandy Ka-Yee CHAU, Wing-Kin TO, Tak-Lun QUE, David Ho-Keung SHUM, Shea Ping YIP, Wing Cheung YAM, Gilman Kit-Hang SIU |
| EPI_ISL_418819                                                                                                                                                                                                                                                                                                                                                                                                                                        | hCoV-19/Canada/BC_3808524/2020     | North America / Canada / British Columbia   | 2020-03-09 | BCCDC Public Health Laboratory BCCDC Public Health Laboratory Harrigan, Prystajecy, Krajden, Lee, Kamelian, Lapointe, Choi, Hoang, Sekirov, Levett, Tyson, Snutch, Loman, Quick, Li, Gilmour                                                                                                                                                                                                                                                                                                                                                                                                                                                                                         |
| EPI_ISL_418820                                                                                                                                                                                                                                                                                                                                                                                                                                        | hCoV-19/Canada/BC_3842755/2020     | North America / Canada / British Columbia   | 2020-03-09 | BCCDC Public Health Laboratory BCCDC Public Health Laboratory Harrigan, Prystajecy, Krajden, Lee, Kamelian, Lapointe, Choi, Hoang, Sekirov, Levett, Tyson, Snutch, Loman, Quick, Li, Gilmour                                                                                                                                                                                                                                                                                                                                                                                                                                                                                         |
| EPI_ISL_418821                                                                                                                                                                                                                                                                                                                                                                                                                                        | hCoV-19/Canada/BC_3968175/2020     | North America / Canada / British Columbia   | 2020-03-10 | BCCDC Public Health Laboratory BCCDC Public Health Laboratory Harrigan, Prystajecy, Krajden, Lee, Kamelian, Lapointe, Choi, Hoang, Sekirov, Levett, Tyson, Snutch, Loman, Quick, Li, Gilmour                                                                                                                                                                                                                                                                                                                                                                                                                                                                                         |
| EPI_ISL_418822                                                                                                                                                                                                                                                                                                                                                                                                                                        | hCoV-19/Canada/BC_3972884/2020     | North America / Canada / British Columbia   | 2020-03-10 | BCCDC Public Health Laboratory BCCDC Public Health Laboratory Harrigan, Prystajecy, Krajden, Lee, Kamelian, Lapointe, Choi, Hoang, Sekirov, Levett, Tyson, Snutch, Loman, Quick, Li, Gilmour                                                                                                                                                                                                                                                                                                                                                                                                                                                                                         |
| EPI_ISL_418823                                                                                                                                                                                                                                                                                                                                                                                                                                        | hCoV-19/Canada/BC_3989992/2020     | North America / Canada / British Columbia   | 2020-03-09 | BCCDC Public Health Laboratory BCCDC Public Health Laboratory Harrigan, Prystajecy, Krajden, Lee, Kamelian, Lapointe, Choi, Hoang, Sekirov, Levett, Tyson, Snutch, Loman, Quick, Li, Gilmour                                                                                                                                                                                                                                                                                                                                                                                                                                                                                         |
| EPI_ISL_418824                                                                                                                                                                                                                                                                                                                                                                                                                                        | hCoV-19/Canada/BC_4078583/2020     | North America / Canada / British Columbia   | 2020-03-03 | BCCDC Public Health Laboratory BCCDC Public Health Laboratory Harrigan, Prystajecy, Krajden, Lee, Kamelian, Lapointe, Choi, Hoang, Sekirov, Levett, Tyson, Snutch, Loman, Quick, Li, Gilmour                                                                                                                                                                                                                                                                                                                                                                                                                                                                                         |
| EPI_ISL_418825                                                                                                                                                                                                                                                                                                                                                                                                                                        | hCoV-19/Canada/BC_4118226/2020     | North America / Canada / British Columbia   | 2020-03-10 | BCCDC Public Health Laboratory BCCDC Public Health Laboratory Harrigan, Prystajecy, Krajden, Lee, Kamelian, Lapointe, Choi, Hoang, Sekirov, Levett, Tyson, Snutch, Loman, Quick, Li, Gilmour                                                                                                                                                                                                                                                                                                                                                                                                                                                                                         |
| EPI_ISL_418826                                                                                                                                                                                                                                                                                                                                                                                                                                        | hCoV-19/Canada/BC_4122951/2020     | North America / Canada / British Columbia   | 2020-03-10 | BCCDC Public Health Laboratory BCCDC Public Health Laboratory Harrigan, Prystajecy, Krajden, Lee, Kamelian, Lapointe, Choi, Hoang, Sekirov, Levett, Tyson, Snutch, Loman, Quick, Li, Gilmour                                                                                                                                                                                                                                                                                                                                                                                                                                                                                         |
| EPI_ISL_418829                                                                                                                                                                                                                                                                                                                                                                                                                                        | hCoV-19/Canada/BC_4540462/2020     | North America / Canada / British Columbia   | 2020-03-10 | BCCDC Public Health Laboratory BCCDC Public Health Laboratory Harrigan, Prystajecy, Krajden, Lee, Kamelian,                                                                                                                                                                                                                                                                                                                                                                                                                                                                                                                                                                          |

|                                                                                  |                                                                                   |                                                                                                                                                          |                                           |               |          |
|----------------------------------------------------------------------------------|-----------------------------------------------------------------------------------|----------------------------------------------------------------------------------------------------------------------------------------------------------|-------------------------------------------|---------------|----------|
| Lapointe, Choi, Hoang, Sekirov, Levett, Tyson, Snutch, Loman, Quick, Li, Gilmour | EPI_ISL_418830                                                                    | hCoV-19/Canada/BC_4799711/2020                                                                                                                           | North America / Canada / British Columbia | 2020-03-09    |          |
| BCCDC Public Health Laboratory                                                   | BCCDC Public Health Laboratory                                                    | Harrigan, Prystajecy, Krajden, Lee, Kamelian,                                                                                                            |                                           |               |          |
| Lapointe, Choi, Hoang, Sekirov, Levett, Tyson, Snutch, Loman, Quick, Li, Gilmour | EPI_ISL_418831                                                                    | hCoV-19/Canada/BC_5275718/2020                                                                                                                           | North America / Canada / British Columbia | 2020-03-11    |          |
| BCCDC Public Health Laboratory                                                   | BCCDC Public Health Laboratory                                                    | Harrigan, Prystajecy, Krajden, Lee, Kamelian,                                                                                                            |                                           |               |          |
| Lapointe, Choi, Hoang, Sekirov, Levett, Tyson, Snutch, Loman, Quick, Li, Gilmour | EPI_ISL_418832                                                                    | hCoV-19/Canada/BC_5282984/2020                                                                                                                           | North America / Canada / British Columbia | 2020-03-11    |          |
| BCCDC Public Health Laboratory                                                   | BCCDC Public Health Laboratory                                                    | Harrigan, Prystajecy, Krajden, Lee, Kamelian,                                                                                                            |                                           |               |          |
| Lapointe, Choi, Hoang, Sekirov, Levett, Tyson, Snutch, Loman, Quick, Li, Gilmour | EPI_ISL_418833                                                                    | hCoV-19/Canada/BC_5306970/2020                                                                                                                           | North America / Canada / British Columbia | 2020-03-11    |          |
| BCCDC Public Health Laboratory                                                   | BCCDC Public Health Laboratory                                                    | Harrigan, Prystajecy, Krajden, Lee, Kamelian,                                                                                                            |                                           |               |          |
| Lapointe, Choi, Hoang, Sekirov, Levett, Tyson, Snutch, Loman, Quick, Li, Gilmour | EPI_ISL_418834                                                                    | hCoV-19/Canada/BC_5522039/2020                                                                                                                           | North America / Canada / British Columbia | 2020-03-11    |          |
| BCCDC Public Health Laboratory                                                   | BCCDC Public Health Laboratory                                                    | Harrigan, Prystajecy, Krajden, Lee, Kamelian,                                                                                                            |                                           |               |          |
| Lapointe, Choi, Hoang, Sekirov, Levett, Tyson, Snutch, Loman, Quick, Li, Gilmour | EPI_ISL_418835                                                                    | hCoV-19/Canada/BC_5979789/2020                                                                                                                           | North America / Canada / British Columbia | 2020-03-11    |          |
| BCCDC Public Health Laboratory                                                   | BCCDC Public Health Laboratory                                                    | Harrigan, Prystajecy, Krajden, Lee, Kamelian,                                                                                                            |                                           |               |          |
| Lapointe, Choi, Hoang, Sekirov, Levett, Tyson, Snutch, Loman, Quick, Li, Gilmour | EPI_ISL_418836                                                                    | hCoV-19/Canada/BC_6004567/2020                                                                                                                           | North America / Canada / British Columbia | 2020-03-10    |          |
| BCCDC Public Health Laboratory                                                   | BCCDC Public Health Laboratory                                                    | Harrigan, Prystajecy, Krajden, Lee, Kamelian,                                                                                                            |                                           |               |          |
| Lapointe, Choi, Hoang, Sekirov, Levett, Tyson, Snutch, Loman, Quick, Li, Gilmour | EPI_ISL_418837                                                                    | hCoV-19/Canada/BC_6129127/2020                                                                                                                           | North America / Canada / British Columbia | 2020-03-10    |          |
| BCCDC Public Health Laboratory                                                   | BCCDC Public Health Laboratory                                                    | Harrigan, Prystajecy, Krajden, Lee, Kamelian,                                                                                                            |                                           |               |          |
| Lapointe, Choi, Hoang, Sekirov, Levett, Tyson, Snutch, Loman, Quick, Li, Gilmour | EPI_ISL_418860                                                                    | hCoV-19/Spain/VH00001133/2020                                                                                                                            | Europe / Spain / Barcelona                | 2020-03-15    | Hospital |
| Universitari Vall d'Hebron (HUVH) - Vall d'Hebron Research Institute (VHIR)      | Universitari Vall d'Hebron (HUVH) - Vall d'Hebron Research Institute (VHIR)       | Cristina Andrés, Dàmir Garcia-Cehic, Maria Piñana, Mercedes Guerrero-Murillo, Ariadna Rando, Tomàs Pumarola, Maria Gema Codina, Andrés Antón, Josep Quer |                                           |               |          |
| EPI_ISL_418861                                                                   | hCoV-19/Spain/VH198152683/2020                                                    | Europe / Spain / Barcelona                                                                                                                               | 2020-03-24                                | Hospital      |          |
| Universitari Vall d'Hebron (HUVH) - Vall d'Hebron Research Institute (VHIR)      | Universitari Vall d'Hebron (HUVH) - Vall d'Hebron Research Institute (VHIR)       | Cristina Andrés, Dàmir Garcia-Cehic, Maria Piñana, Mercedes Guerrero-Murillo, Ariadna Rando, Tomàs Pumarola, Maria Gema Codina, Andrés Antón, Josep Quer |                                           |               |          |
| EPI_ISL_418863                                                                   | hCoV-19/Belgium/VS-030542/2020                                                    | Europe / Belgium / Komen                                                                                                                                 | 2020-03-05                                | KU Leuven,    |          |
| Clinical and Epidemiological Virology                                            | KU Leuven, Clinical and Epidemiological Virology                                  | Bert                                                                                                                                                     |                                           |               |          |
| Vanmechelen, Joan Marti-Carreras, Tony Wawina, Piet Maes                         |                                                                                   |                                                                                                                                                          |                                           |               |          |
| EPI_ISL_418864                                                                   | hCoV-19/USA/VA-DCLS-0001/2020                                                     | North America / USA / Virginia                                                                                                                           | 2020-03-17                                | Virginia DCLS |          |
| Virginia DCLS                                                                    | Virginia DCLS                                                                     |                                                                                                                                                          |                                           |               |          |
| EPI_ISL_418866                                                                   | hCoV-19/USA/WA-UW298/2020                                                         | North America / USA / Washington                                                                                                                         | 2020-03-13                                | UW            |          |
| Virology Lab                                                                     | UW Virology Lab Pavitra Roychoudhury, Hong Xie, Keith Jerome, Alexander Greninger |                                                                                                                                                          |                                           |               |          |
| EPI_ISL_418867                                                                   | hCoV-19/USA/WA-UW299/2020                                                         | North America / USA / Washington                                                                                                                         | 2020-03-13                                | UW            |          |
| Virology Lab                                                                     | UW Virology Lab Pavitra Roychoudhury, Hong Xie, Keith Jerome, Alexander Greninger |                                                                                                                                                          |                                           |               |          |
| EPI_ISL_418868                                                                   | hCoV-19/USA/WA-UW300/2020                                                         | North America / USA / Washington                                                                                                                         | 2020-03-13                                | UW            |          |
| Virology Lab                                                                     | UW Virology Lab Pavitra Roychoudhury, Hong Xie, Keith Jerome, Alexander Greninger |                                                                                                                                                          |                                           |               |          |
| EPI_ISL_418869                                                                   | hCoV-19/USA/WA-UW301/2020                                                         | North America / USA / Washington                                                                                                                         | 2020-03-16                                | UW            |          |
| Virology Lab                                                                     | UW Virology Lab Pavitra Roychoudhury, Hong Xie, Keith Jerome, Alexander Greninger |                                                                                                                                                          |                                           |               |          |
| EPI_ISL_418870                                                                   | hCoV-19/USA/WA-UW302/2020                                                         | North America / USA / Washington                                                                                                                         | 2020-03-16                                | UW            |          |
| Virology Lab                                                                     | UW Virology Lab Pavitra Roychoudhury, Hong Xie, Keith Jerome, Alexander Greninger |                                                                                                                                                          |                                           |               |          |
| EPI_ISL_418871                                                                   | hCoV-19/USA/CT-UW303/2020                                                         | North America / USA / Connecticut                                                                                                                        | 2020-03-14                                | UW            |          |
| Virology Lab                                                                     | UW Virology Lab Pavitra Roychoudhury, Hong Xie, Keith Jerome, Alexander Greninger |                                                                                                                                                          |                                           |               |          |
| EPI_ISL_418872                                                                   | hCoV-19/USA/WA-UW304/2020                                                         | North America / USA / Washington                                                                                                                         | 2020-03-16                                | UW            |          |
| Virology Lab                                                                     | UW Virology Lab Pavitra Roychoudhury, Hong Xie, Keith Jerome, Alexander Greninger |                                                                                                                                                          |                                           |               |          |
| EPI_ISL_418873                                                                   | hCoV-19/USA/WA-UW305/2020                                                         | North America / USA / Washington                                                                                                                         | 2020-03-16                                | UW            |          |
| Virology Lab                                                                     | UW Virology Lab Pavitra Roychoudhury, Hong Xie, Keith Jerome, Alexander Greninger |                                                                                                                                                          |                                           |               |          |
| EPI_ISL_418875                                                                   | hCoV-19/USA/WA-UW307/2020                                                         | North America / USA / Washington                                                                                                                         | 2020-03-16                                | UW            |          |
| Virology Lab                                                                     | UW Virology Lab Pavitra Roychoudhury, Hong Xie, Keith Jerome, Alexander Greninger |                                                                                                                                                          |                                           |               |          |
| EPI_ISL_418876                                                                   | hCoV-19/USA/WA-UW308/2020                                                         | North America / USA / Washington                                                                                                                         | 2020-03-16                                | UW            |          |
| Virology Lab                                                                     | UW Virology Lab Pavitra Roychoudhury, Hong Xie, Keith Jerome, Alexander Greninger |                                                                                                                                                          |                                           |               |          |
| EPI_ISL_418877                                                                   | hCoV-19/USA/WA-UW309/2020                                                         | North America / USA / Washington                                                                                                                         | 2020-03-24                                | UW            |          |
| Virology Lab                                                                     | UW Virology Lab Pavitra Roychoudhury, Hong Xie, Keith Jerome, Alexander Greninger |                                                                                                                                                          |                                           |               |          |
| EPI_ISL_418878                                                                   | hCoV-19/USA/WA-UW310/2020                                                         | North America / USA / Washington                                                                                                                         | 2020-03-14                                | UW            |          |
| Virology Lab                                                                     | UW Virology Lab Pavitra Roychoudhury, Hong Xie, Keith Jerome, Alexander Greninger |                                                                                                                                                          |                                           |               |          |
| EPI_ISL_418880                                                                   | hCoV-19/USA/WA-UW313/2020                                                         | North America / USA / Washington                                                                                                                         | 2020-03-14                                | UW            |          |
| Virology Lab                                                                     | UW Virology Lab Pavitra Roychoudhury, Hong Xie, Keith Jerome, Alexander Greninger |                                                                                                                                                          |                                           |               |          |
| EPI_ISL_418881                                                                   | hCoV-19/USA/WA-UW314/2020                                                         | North America / USA / Washington                                                                                                                         | 2020-03-14                                | UW            |          |
| Virology Lab                                                                     | UW Virology Lab Pavitra Roychoudhury, Hong Xie, Keith Jerome, Alexander Greninger |                                                                                                                                                          |                                           |               |          |
| EPI_ISL_418882                                                                   | hCoV-19/USA/WA-UW315/2020                                                         | North America / USA / Washington                                                                                                                         | 2020-03-13                                | UW            |          |
| Virology Lab                                                                     | UW Virology Lab Pavitra Roychoudhury, Hong Xie, Keith Jerome, Alexander Greninger |                                                                                                                                                          |                                           |               |          |
| EPI_ISL_418883                                                                   | hCoV-19/USA/WA-UW316/2020                                                         | North America / USA / Washington                                                                                                                         | 2020-03-14                                | UW            |          |
| Virology Lab                                                                     | UW Virology Lab Pavitra Roychoudhury, Hong Xie, Keith Jerome, Alexander Greninger |                                                                                                                                                          |                                           |               |          |

|                              |                                                                                                                                                                                                                                                                                                                               |                                                    |            |                                                       |
|------------------------------|-------------------------------------------------------------------------------------------------------------------------------------------------------------------------------------------------------------------------------------------------------------------------------------------------------------------------------|----------------------------------------------------|------------|-------------------------------------------------------|
| EPI_ISL_418884               | hCoV-19/USA/WA-UW317/2020                                                                                                                                                                                                                                                                                                     | North America / USA / Washington                   | 2020-03-15 | UW                                                    |
| Virology Lab                 | UW Virology Lab Pavitra Roychoudhury, Hong Xie, Keith Jerome, Alexander Greninger                                                                                                                                                                                                                                             |                                                    |            |                                                       |
| EPI_ISL_418886               | hCoV-19/USA/WA-UW319/2020                                                                                                                                                                                                                                                                                                     | North America / USA / Washington                   | 2020-03-15 | UW                                                    |
| Virology Lab                 | UW Virology Lab Pavitra Roychoudhury, Hong Xie, Keith Jerome, Alexander Greninger                                                                                                                                                                                                                                             |                                                    |            |                                                       |
| EPI_ISL_418887               | hCoV-19/USA/WA-UW320/2020                                                                                                                                                                                                                                                                                                     | North America / USA / Washington                   | 2020-03-14 | UW                                                    |
| Virology Lab                 | UW Virology Lab Pavitra Roychoudhury, Hong Xie, Keith Jerome, Alexander Greninger                                                                                                                                                                                                                                             |                                                    |            |                                                       |
| EPI_ISL_418888               | hCoV-19/USA/WA-UW321/2020                                                                                                                                                                                                                                                                                                     | North America / USA / Washington                   | 2020-03-15 | UW                                                    |
| Virology Lab                 | UW Virology Lab Pavitra Roychoudhury, Hong Xie, Keith Jerome, Alexander Greninger                                                                                                                                                                                                                                             |                                                    |            |                                                       |
| EPI_ISL_418889               | hCoV-19/USA/WA-UW322/2020                                                                                                                                                                                                                                                                                                     | North America / USA / Washington                   | 2020-03-16 | UW                                                    |
| Virology Lab                 | UW Virology Lab Pavitra Roychoudhury, Hong Xie, Keith Jerome, Alexander Greninger                                                                                                                                                                                                                                             |                                                    |            |                                                       |
| EPI_ISL_418890               | hCoV-19/USA/WA-UW323/2020                                                                                                                                                                                                                                                                                                     | North America / USA / Washington                   | 2020-03-16 | UW                                                    |
| Virology Lab                 | UW Virology Lab Pavitra Roychoudhury, Hong Xie, Keith Jerome, Alexander Greninger                                                                                                                                                                                                                                             |                                                    |            |                                                       |
| EPI_ISL_418891               | hCoV-19/USA/WA-UW324/2020                                                                                                                                                                                                                                                                                                     | North America / USA / Washington                   | 2020-03-24 | UW                                                    |
| Virology Lab                 | UW Virology Lab Pavitra Roychoudhury, Hong Xie, Keith Jerome, Alexander Greninger                                                                                                                                                                                                                                             |                                                    |            |                                                       |
| EPI_ISL_418892               | hCoV-19/USA/WA-UW325/2020                                                                                                                                                                                                                                                                                                     | North America / USA / Washington                   | 2020-03-16 | UW                                                    |
| Virology Lab                 | UW Virology Lab Pavitra Roychoudhury, Hong Xie, Keith Jerome, Alexander Greninger                                                                                                                                                                                                                                             |                                                    |            |                                                       |
| EPI_ISL_418893               | hCoV-19/USA/MN-UW326/2020                                                                                                                                                                                                                                                                                                     | North America / USA / Minnesota                    | 2020-03-13 | UW Virology Lab                                       |
| UW Virology Lab              | Pavitra Roychoudhury, Hong Xie, Keith Jerome, Alexander Greninger                                                                                                                                                                                                                                                             |                                                    |            |                                                       |
| EPI_ISL_418895               | hCoV-19/USA/CT-UW328/2020                                                                                                                                                                                                                                                                                                     | North America / USA / Connecticut                  | 2020-03-14 | UW                                                    |
| Virology Lab                 | UW Virology Lab Pavitra Roychoudhury, Hong Xie, Keith Jerome, Alexander Greninger                                                                                                                                                                                                                                             |                                                    |            |                                                       |
| EPI_ISL_418897               | hCoV-19/USA/WA-UW330/2020                                                                                                                                                                                                                                                                                                     | North America / USA / Washington                   | 2020-03-16 | UW                                                    |
| Virology Lab                 | UW Virology Lab Pavitra Roychoudhury, Hong Xie, Keith Jerome, Alexander Greninger                                                                                                                                                                                                                                             |                                                    |            |                                                       |
| EPI_ISL_418898               | hCoV-19/USA/CT-UW331/2020                                                                                                                                                                                                                                                                                                     | North America / USA / Connecticut                  | 2020-03-14 | UW                                                    |
| Virology Lab                 | UW Virology Lab Pavitra Roychoudhury, Hong Xie, Keith Jerome, Alexander Greninger                                                                                                                                                                                                                                             |                                                    |            |                                                       |
| EPI_ISL_418899               | hCoV-19/USA/WA-UW332/2020                                                                                                                                                                                                                                                                                                     | North America / USA / Washington                   | 2020-03-16 | UW                                                    |
| Virology Lab                 | UW Virology Lab Pavitra Roychoudhury, Hong Xie, Keith Jerome, Alexander Greninger                                                                                                                                                                                                                                             |                                                    |            |                                                       |
| EPI_ISL_419600               | hCoV-19/Luxembourg/LNS9080444/2020                                                                                                                                                                                                                                                                                            | Europe / Luxembourg                                | 2020-03-13 | Laboratoire National de Santé, Microbiology, Virology |
| Microbial Genomics           | Anke Wienecke-Baldacchino, Ardashel Latsuzbaia, Jessica Tapp, Catherine Ragimbeau, Guillaume Fournier, Tamir Abdelrahman, Trung Nguyen Nguyen, Joel Mossong                                                                                                                                                                   |                                                    |            |                                                       |
| EPI_ISL_419601               | hCoV-19/Luxembourg/LNS9086704/2020                                                                                                                                                                                                                                                                                            | Europe / Luxembourg                                | 2020-03-15 | Laboratoire National de Santé, Microbiology, Virology |
| Microbial Genomics           | Anke Wienecke-Baldacchino, Ardashel Latsuzbaia, Jessica Tapp, Catherine Ragimbeau, Guillaume Fournier, Tamir Abdelrahman, Trung Nguyen Nguyen, Joel Mossong                                                                                                                                                                   |                                                    |            |                                                       |
| EPI_ISL_419602               | hCoV-19/Luxembourg/LNS9324837/2020                                                                                                                                                                                                                                                                                            | Europe / Luxembourg                                | 2020-03-12 | Laboratoire National de Santé, Microbiology, Virology |
| Microbial Genomics           | Anke Wienecke-Baldacchino, Ardashel Latsuzbaia, Jessica Tapp, Catherine Ragimbeau, Guillaume Fournier, Tamir Abdelrahman, Trung Nguyen Nguyen, Joel Mossong                                                                                                                                                                   |                                                    |            |                                                       |
| EPI_ISL_419603               | hCoV-19/Luxembourg/LNS9512434/2020                                                                                                                                                                                                                                                                                            | Europe / Luxembourg                                | 2020-03-16 | Laboratoire National de Santé, Microbiology, Virology |
| Microbial Genomics           | Anke Wienecke-Baldacchino, Ardashel Latsuzbaia, Jessica Tapp, Catherine Ragimbeau, Guillaume Fournier, Tamir Abdelrahman, Trung Nguyen Nguyen, Joel Mossong                                                                                                                                                                   |                                                    |            |                                                       |
| EPI_ISL_419604               | hCoV-19/Luxembourg/LNS9627078/2020                                                                                                                                                                                                                                                                                            | Europe / Luxembourg                                | 2020-03-15 | Laboratoire National de Santé, Microbiology, Virology |
| Microbial Genomics           | Anke Wienecke-Baldacchino, Ardashel Latsuzbaia, Jessica Tapp, Catherine Ragimbeau, Guillaume Fournier, Tamir Abdelrahman, Trung Nguyen Nguyen, Joel Mossong                                                                                                                                                                   |                                                    |            |                                                       |
| EPI_ISL_419606               | hCoV-19/Luxembourg/LNS9862689/2020                                                                                                                                                                                                                                                                                            | Europe / Luxembourg                                | 2020-03-11 | Laboratoire National de Santé, Microbiology, Virology |
| Microbial Genomics           | Anke Wienecke-Baldacchino, Ardashel Latsuzbaia, Jessica Tapp, Catherine Ragimbeau, Guillaume Fournier, Tamir Abdelrahman, Trung Nguyen Nguyen, Joel Mossong                                                                                                                                                                   |                                                    |            |                                                       |
| EPI_ISL_419607               | hCoV-19/Luxembourg/LNS9982497/2020                                                                                                                                                                                                                                                                                            | Europe / Luxembourg                                | 2020-03-14 | Laboratoire National de Santé, Microbiology, Virology |
| Microbial Genomics           | Anke Wienecke-Baldacchino, Ardashel Latsuzbaia, Jessica Tapp, Catherine Ragimbeau, Guillaume Fournier, Tamir Abdelrahman, Trung Nguyen Nguyen, Joel Mossong                                                                                                                                                                   |                                                    |            |                                                       |
| EPI_ISL_419651               | hCoV-19/USA/WI-GMF-00466/2020                                                                                                                                                                                                                                                                                                 | North America / USA / Minnesota / Winona County    | 2020-03-29 | Gundersen Molecular Diagnostics Laboratory            |
| Richmond & Paraic A. Kenny   |                                                                                                                                                                                                                                                                                                                               | Kabara Cancer Research Institute                   |            | Craig S. Richmond & Paraic A. Kenny                   |
| EPI_ISL_419652               | hCoV-19/USA/WI-GMF-00281/2020                                                                                                                                                                                                                                                                                                 | North America / USA / Wisconsin / La Crosse County | 2020-03-25 | Gundersen Molecular Diagnostics Laboratory            |
| Richmond & Paraic A. Kenny   |                                                                                                                                                                                                                                                                                                                               | Kabara Cancer Research Institute                   |            | Craig S. Richmond & Paraic A. Kenny                   |
| EPI_ISL_419654               | hCoV-19/Austria/CeMM0001/2020                                                                                                                                                                                                                                                                                                 | Europe / Austria                                   | 2020-03-03 | Center for Virology, Medical University of Vienna     |
| Austrian Academy of Sciences | Bergthaler laboratory, CeMM Research Center for Molecular Medicine of the Alexandra Popa, Benedikt Agerer, Henrique Colaco, Lukas Endler, Jakob-Wendelin Genger, Alexander Lercher, Mark Smyth, Thomas Penz, Michael Schuster, Judith Aberle, Stephan Aberle, Elisabeth Puchhammer-Stöckl, Christoph Bock, Andreas Bergthaler |                                                    |            |                                                       |
| EPI_ISL_419655               | hCoV-19/Austria/CeMM0002/2020                                                                                                                                                                                                                                                                                                 | Europe / Austria / Vienna                          | 2020-02-26 | Center for Virology, Medical University of Vienna     |
| Austrian Academy of Sciences | Bergthaler laboratory, CeMM Research Center for Molecular Medicine of the Alexandra Popa, Benedikt Agerer, Henrique Colaco, Lukas Endler, Jakob-Wendelin Genger, Alexander Lercher, Mark Smyth, Thomas Penz, Michael Schuster, Judith Aberle, Stephan Aberle, Elisabeth Puchhammer-Stöckl, Christoph Bock, Andreas Bergthaler |                                                    |            |                                                       |





EPI\_ISL\_419673 hCoV-19/Austria/CeMM0020/2020 Europe / Austria 2020-03-22 Center for Virology, Medical University of Vienna Bergthaler laboratory, CeMM Research Center for Molecular Medicine of the Austrian Academy of Sciences Alexandra Popa, Benedikt Agerer, Henrique Colaco, Lukas Endler, Jakob-Wendelin Genger, Alexander Lercher, Mark Smyth, Thomas Penz, Michael Schuster, Judith Aberle, Stephan Aberle, Elisabeth Puchhammer-Stöckl, Christoph Bock, Andreas Bergthaler

EPI\_ISL\_419674 hCoV-19/Austria/CeMM0021/2020 Europe / Austria 2020-03-24 Center for Virology, Medical University of Vienna Bergthaler laboratory, CeMM Research Center for Molecular Medicine of the Austrian Academy of Sciences Alexandra Popa, Benedikt Agerer, Henrique Colaco, Lukas Endler, Jakob-Wendelin Genger, Alexander Lercher, Mark Smyth, Thomas Penz, Michael Schuster, Judith Aberle, Stephan Aberle, Elisabeth Puchhammer-Stöckl, Christoph Bock, Andreas Bergthaler

EPI\_ISL\_419675 hCoV-19/Spain/Valencia11/2020 Europe / Spain / Comunitat Valenciana / Valencia 2020-03-20 Servicio de Microbiología. Consorcio Hospital General Universitario de Valencia Sequencing and Bioinformatics Service and Molecular Epidemiology Research Group. FISABIO-Public Health Maria Alma Bracho, Maria Dolores Ocete, Giuseppe D'Auria, Griselda De Marco, Neris Garcia-Gonzalez, Concepcion Gimeno, Fernando Gonzalez-Candelas

EPI\_ISL\_419676 hCoV-19/Spain/Valencia12/2020 Europe / Spain / Comunitat Valenciana / Valencia 2020-03-09 Servicio de Microbiología. Consorcio Hospital General Universitario de Valencia Sequencing and Bioinformatics Service and Molecular Epidemiology Research Group. FISABIO-Public Health Maria Dolores Ocete, Giuseppe D'Auria, Griselda De Marco, Neris Garcia-Gonzalez, Maria Alma Bracho, Concepcion Gimeno, Fernando Gonzalez-Candelas

EPI\_ISL\_419677 hCoV-19/Spain/Valencia13/2020 Europe / Spain / Comunitat Valenciana / Valencia 2020-03-09 Servicio de Microbiología. Consorcio Hospital General Universitario de Valencia Sequencing and Bioinformatics Service and Molecular Epidemiology Research Group. FISABIO-Public Health Giuseppe D'Auria, Griselda De Marco, Neris Garcia-Gonzalez, Maria Alma Bracho, Maria Dolores Ocete, Concepcion Gimeno, Fernando Gonzalez-Candelas

EPI\_ISL\_419678 hCoV-19/Spain/Valencia14/2020 Europe / Spain / Comunitat Valenciana / Valencia 2020-03-09 Servicio de Microbiología. Consorcio Hospital General Universitario de Valencia Sequencing and Bioinformatics Service and Molecular Epidemiology Research Group. FISABIO-Public Health Griselda De Marco, Neris Garcia-Gonzalez, Maria Alma Bracho, Maria Dolores Ocete, Giuseppe D'Auria, Concepcion Gimeno, Fernando Gonzalez-Candelas

EPI\_ISL\_419679 hCoV-19/Spain/Valencia15/2020 Europe / Spain / Comunitat Valenciana / Valencia 2020-03-02 Servicio de Microbiología. Consorcio Hospital General Universitario de Valencia Sequencing and Bioinformatics Service and Molecular Epidemiology Research Group. FISABIO-Public Health Neris Garcia-Gonzalez, Maria Alma Bracho, Maria Dolores Ocete, Giuseppe D'Auria, Griselda De Marco, Concepcion Gimeno, Fernando Gonzalez-Candelas

EPI\_ISL\_419680 hCoV-19/Spain/Valencia16/2020 Europe / Spain / Comunitat Valenciana / Valencia 2020-03-10 Servicio de Microbiología. Consorcio Hospital General Universitario de Valencia Sequencing and Bioinformatics Service and Molecular Epidemiology Research Group. FISABIO-Public Health Maria Alma Bracho, Maria Dolores Ocete, Giuseppe D'Auria, Griselda De Marco, Neris Garcia-Gonzalez, Concepcion Gimeno, Fernando Gonzalez-Candelas

EPI\_ISL\_419681 hCoV-19/Spain/Valencia17/2020 Europe / Spain / Comunitat Valenciana / Valencia 2020-03-10 Servicio de Microbiología. Consorcio Hospital General Universitario de Valencia Sequencing and Bioinformatics Service and Molecular Epidemiology Research Group. FISABIO-Public Health Maria Dolores Ocete, Giuseppe D'Auria, Griselda De Marco, Neris Garcia-Gonzalez, Maria Alma Bracho, Concepcion Gimeno, Fernando Gonzalez-Candelas

EPI\_ISL\_419682 hCoV-19/Spain/Valencia18/2020 Europe / Spain / Comunitat Valenciana / Valencia 2020-03-10 Servicio de Microbiología. Consorcio Hospital General Universitario de Valencia Sequencing and Bioinformatics Service and Molecular Epidemiology Research Group. FISABIO-Public Health Giuseppe D'Auria, Griselda De Marco, Neris Garcia-Gonzalez, Maria Alma Bracho, Maria Dolores Ocete, Concepcion Gimeno, Fernando Gonzalez-Candelas

EPI\_ISL\_419683 hCoV-19/Spain/Valencia19/2020 Europe / Spain / Comunitat Valenciana / Valencia 2020-03-08 Servicio de Microbiología. Consorcio Hospital General Universitario de Valencia Sequencing and Bioinformatics Service and Molecular Epidemiology Research Group. FISABIO-Public Health Griselda De Marco, Neris Garcia-Gonzalez, Maria Alma Bracho, Maria Dolores Ocete, Giuseppe D'Auria, Concepcion Gimeno, Fernando Gonzalez-Candelas

EPI\_ISL\_419691 hCoV-19/Latvia/ChVir2025/2020 Europe / Latvia / Riga 2020-03 E. Gulbja Laboratorija Charité Universitätsmedizin Berlin, Institute of Virology Victor M Corman, Julia Schneider, Barbara Mühlemann, Talitha Veith, Jörn Beheim-Schwarzbach, Terry Jones, Dr. Didzis Gavars, Mikus Gavars, Dmitrijs Perminovs, Christian Drosten

EPI\_ISL\_419692 hCoV-19/Belarus/ChVir2072/2020 Europe / Belarus 2020-03 The Republican Research and Practical Center for Epidemiology and Microbiology Charité Universitätsmedizin Berlin, Institute of Virology Victor M Corman, Julia Schneider, Barbara Mühlemann, Talitha Veith, Jörn Beheim-Schwarzbach, Terry Jones, Natallia Shmialiova, Natallia Sivets, Christian Drosten

EPI\_ISL\_419693 hCoV-19/Belarus/ChVir2073/2020 Europe / Belarus 2020-03 The Republican Research and Practical Center for Epidemiology and Microbiology Charité Universitätsmedizin Berlin, Institute of Virology Victor M Corman, Julia Schneider, Barbara Mühlemann, Talitha Veith, Jörn Beheim-Schwarzbach, Terry Jones, Natallia Shmialiova, Natallia Sivets, Christian Drosten

EPI\_ISL\_419696 hCoV-19/USA/NY-NYUMC35/2020 North America / USA / New York / Manhattan 2020-03-18 NYU Langone Health Departments of Pathology and Medicine, New York University School of Medicine Maria Aguerro-Rosenfeld, Margaret Black, John Cadley, Paolo Cotzia, John Chen, Dacia Dimartino, Xiaojun Feng, Adriana

Heguy, Megan Hogan, Emily Huang, George Jour, Christian Marier, Matthew T. Maurano, Mark J. Mulligan, Peter Meyn, Jared Pinnell, Sitharam Ramaswami, Amy Rapkiewicz, Marie Samanovic-Golden, Antonio Serrano, Guomiao Shen, Matija Snuderl, Nick Vulpescu, Gael Westby, Paul Zappile, Yutong Zhang  
EPI\_ISL\_419697 hCoV-19/USA/NY-NYUMC36/2020 North America / USA / New York / Manhattan 2020-03-18  
NYU Langone Health Departments of Pathology and Medicine, New York University School of Medicine Maria Aguero-Rosenfeld, Margaret Black, John Cadley, Paolo Cotzia, John Chen, Dacia Dimartino, Xiaojun Feng, Adriana Heguy, Megan Hogan, Emily Huang, George Jour, Christian Marier, Matthew T. Maurano, Mark J. Mulligan, Peter Meyn, Jared Pinnell, Sitharam Ramaswami, Amy Rapkiewicz, Marie Samanovic-Golden, Antonio Serrano, Guomiao Shen, Matija Snuderl, Nick Vulpescu, Gael Westby, Paul Zappile, Yutong Zhang  
EPI\_ISL\_419698 hCoV-19/USA/NY-NYUMC37/2020 North America / USA / New York / Manhattan 2020-03-18  
NYU Langone Health Departments of Pathology and Medicine, New York University School of Medicine Maria Aguero-Rosenfeld, Margaret Black, John Cadley, Paolo Cotzia, John Chen, Dacia Dimartino, Xiaojun Feng, Adriana Heguy, Megan Hogan, Emily Huang, George Jour, Christian Marier, Matthew T. Maurano, Mark J. Mulligan, Peter Meyn, Jared Pinnell, Sitharam Ramaswami, Amy Rapkiewicz, Marie Samanovic-Golden, Antonio Serrano, Guomiao Shen, Matija Snuderl, Nick Vulpescu, Gael Westby, Paul Zappile, Yutong Zhang  
EPI\_ISL\_420600 hCoV-19/Argentina/C121/2020 South America / Argentina 2020-03-07 Servicio Virosis Respiratorias-Departamento Virología-INEI Instituto Nacional Enfermedades Infecciosas C.G.Malbran Baumeister E., Avaro M., Benedetti E., Russo M., Dattero ME, Pontoriero A., Cisterna D., Molina V., Perandones C., Tuduri E., Lorenzo F., Poklepovich T., Campos J.  
EPI\_ISL\_420604 hCoV-19/France/ARA12371/2020 Europe / France / ARA / Lyon 2020-03-23 Institut des Agents Infectieux (IAI), Hospices Civils de Lyon CNR Virus des Infections Respiratoires - France SUD Antonin Bal, Gregory Destras, Gwendolyne Burfin, Solenne Brun, Carine Moustaud, Raphaelle Lamy, Alexandre Gaynard, Maude Bouscambert-Duchamp, Florence Morfin-Sherpa, Martine Valette, Bruno Lina, Laurence Josset  
EPI\_ISL\_420605 hCoV-19/France/ARA12384/2020 Europe / France / ARA / Lyon 2020-03-22 Institut des Agents Infectieux (IAI), Hospices Civils de Lyon CNR Virus des Infections Respiratoires - France SUD Antonin Bal, Gregory Destras, Gwendolyne Burfin, Solenne Brun, Carine Moustaud, Raphaelle Lamy, Alexandre Gaynard, Maude Bouscambert-Duchamp, Florence Morfin-Sherpa, Martine Valette, Bruno Lina, Laurence Josset  
EPI\_ISL\_420606 hCoV-19/France/ARA12388/2020 Europe / France / ARA / Lyon 2020-03-22 Institut des Agents Infectieux (IAI), Hospices Civils de Lyon CNR Virus des Infections Respiratoires - France SUD Antonin Bal, Gregory Destras, Gwendolyne Burfin, Solenne Brun, Carine Moustaud, Raphaelle Lamy, Alexandre Gaynard, Maude Bouscambert-Duchamp, Florence Morfin-Sherpa, Martine Valette, Bruno Lina, Laurence Josset  
EPI\_ISL\_420607 hCoV-19/France/ARA12485/2020 Europe / France / ARA / Lyon 2020-03-23 Institut des Agents Infectieux (IAI), Hospices Civils de Lyon CNR Virus des Infections Respiratoires - France SUD Antonin Bal, Gregory Destras, Gwendolyne Burfin, Solenne Brun, Carine Moustaud, Raphaelle Lamy, Alexandre Gaynard, Maude Bouscambert-Duchamp, Florence Morfin-Sherpa, Martine Valette, Bruno Lina, Laurence Josset  
EPI\_ISL\_420608 hCoV-19/France/ARA12499/2020 Europe / France / ARA / Lyon 2020-03-23 Institut des Agents Infectieux (IAI), Hospices Civils de Lyon CNR Virus des Infections Respiratoires - France SUD Antonin Bal, Gregory Destras, Gwendolyne Burfin, Solenne Brun, Carine Moustaud, Raphaelle Lamy, Alexandre Gaynard, Maude Bouscambert-Duchamp, Florence Morfin-Sherpa, Martine Valette, Bruno Lina, Laurence Josset  
EPI\_ISL\_420609 hCoV-19/France/ARA12524/2020 Europe / France / ARA / Lyon 2020-03-23 Institut des Agents Infectieux (IAI), Hospices Civils de Lyon CNR Virus des Infections Respiratoires - France SUD Antonin Bal, Gregory Destras, Gwendolyne Burfin, Solenne Brun, Carine Moustaud, Raphaelle Lamy, Alexandre Gaynard, Maude Bouscambert-Duchamp, Florence Morfin-Sherpa, Martine Valette, Bruno Lina, Laurence Josset  
EPI\_ISL\_420610 hCoV-19/France/ARA12558/2020 Europe / France / ARA / Lyon 2020-03-23 Institut des Agents Infectieux (IAI), Hospices Civils de Lyon CNR Virus des Infections Respiratoires - France SUD Antonin Bal, Gregory Destras, Gwendolyne Burfin, Solenne Brun, Carine Moustaud, Raphaelle Lamy, Alexandre Gaynard, Maude Bouscambert-Duchamp, Florence Morfin-Sherpa, Martine Valette, Bruno Lina, Laurence Josset  
EPI\_ISL\_420611 hCoV-19/France/ARA12576/2020 Europe / France / ARA / Lyon 2020-03-23 Institut des Agents Infectieux (IAI), Hospices Civils de Lyon CNR Virus des Infections Respiratoires - France SUD Antonin Bal, Gregory Destras, Gwendolyne Burfin, Solenne Brun, Carine Moustaud, Raphaelle Lamy, Alexandre Gaynard, Maude Bouscambert-Duchamp, Florence Morfin-Sherpa, Martine Valette, Bruno Lina, Laurence Josset  
EPI\_ISL\_420613 hCoV-19/France/ARA12630/2020 Europe / France / ARA / Macon 2020-03-23 Centre Hospitalier de Macon CNR Virus des Infections Respiratoires - France SUD Antonin Bal, Gregory Destras, Gwendolyne Burfin, Solenne Brun, Carine Moustaud, Raphaelle Lamy, Alexandre Gaynard, Maude Bouscambert-Duchamp, Florence Morfin-Sherpa, Martine Valette, Bruno Lina, Laurence Josset  
EPI\_ISL\_420614 hCoV-19/France/ARA12632/2020 Europe / France / ARA / Macon 2020-03-23 Centre Hospitalier de Macon CNR Virus des Infections Respiratoires - France SUD Antonin Bal, Gregory Destras, Gwendolyne Burfin, Solenne Brun, Carine Moustaud, Raphaelle Lamy, Alexandre Gaynard, Maude Bouscambert-Duchamp, Florence Morfin-Sherpa, Martine Valette, Bruno Lina, Laurence Josset  
EPI\_ISL\_420615 hCoV-19/France/ARA12759/2020 Europe / France / ARA / Lyon 2020-03-23 Institut des Agents Infectieux (IAI), Hospices Civils de Lyon CNR Virus des Infections Respiratoires - France SUD Antonin Bal, Gregory Destras, Gwendolyne Burfin, Solenne Brun, Carine Moustaud, Raphaelle Lamy, Alexandre Gaynard, Maude Bouscambert-Duchamp, Florence Morfin-Sherpa, Martine Valette, Bruno Lina, Laurence Josset  
EPI\_ISL\_420616 hCoV-19/France/ARA1284/2020 Europe / France / ARA / Lyon 2020-03-23 Institut des Agents Infectieux (IAI), Hospices Civils de Lyon CNR Virus des Infections Respiratoires - France SUD Antonin Bal, Gregory Destras, Gwendolyne Burfin, Solenne Brun, Carine Moustaud, Raphaelle Lamy, Alexandre Gaynard, Maude Bouscambert-Duchamp, Florence Morfin-Sherpa, Martine Valette, Bruno Lina, Laurence Josset  
EPI\_ISL\_420617 hCoV-19/France/ARA12877/2020 Europe / France / ARA / Lyon 2020-03-23 Centre Hospitalier Saint Joseph Saint Luc CNR Virus des Infections Respiratoires - France SUD Antonin Bal, Gregory Destras, Gwendolyne Burfin, Solenne Brun, Carine Moustaud, Raphaelle Lamy, Alexandre Gaynard, Maude

Bouscambert-Duchamp, Florence Morfin-Sherpa, Martine Valette, Bruno Lina, Laurence Josset  
EPI\_ISL\_420618 hCoV-19/France/ARA12915/2020 Europe / France / ARA / Lyon 2020-03-23 Institut des  
Agents Infectieux (IAI), Hospices Civils de Lyon CNR Virus des Infections Respiratoires - France SUD  
Antonin Bal, Gregory Destras, Gwendolyne Burfin, Solenne Brun, Carine Moustaud, Raphaelle Lamy, Alexandre  
Gaynard, Maude Bouscambert-Duchamp, Florence Morfin-Sherpa, Martine Valette, Bruno Lina, Laurence Josset  
EPI\_ISL\_420619 hCoV-19/France/ARA12973/2020 Europe / France / ARA / Lyon 2020-03-23 Institut des  
Agents Infectieux (IAI), Hospices Civils de Lyon CNR Virus des Infections Respiratoires - France SUD  
Antonin Bal, Gregory Destras, Gwendolyne Burfin, Solenne Brun, Carine Moustaud, Raphaelle Lamy, Alexandre  
Gaynard, Maude Bouscambert-Duchamp, Florence Morfin-Sherpa, Martine Valette, Bruno Lina, Laurence Josset  
EPI\_ISL\_420620 hCoV-19/France/ARA12996/2020 Europe / France / ARA / Bourg-en-Bresse 2020-03-23 Centre  
Hospitalier de Bourg en Bresse CNR Virus des Infections Respiratoires - France SUD Antonin Bal, Gregory  
Destras, Gwendolyne Burfin, Solenne Brun, Carine Moustaud, Raphaelle Lamy, Alexandre Gaynard, Maude  
Bouscambert-Duchamp, Florence Morfin-Sherpa, Martine Valette, Bruno Lina, Laurence Josset  
EPI\_ISL\_420621 hCoV-19/France/ARA1307/2020 Europe / France / ARA / Lyon 2020-03-24 Institut des  
Agents Infectieux (IAI), Hospices Civils de Lyon CNR Virus des Infections Respiratoires - France SUD  
Antonin Bal, Gregory Destras, Gwendolyne Burfin, Solenne Brun, Carine Moustaud, Raphaelle Lamy, Alexandre  
Gaynard, Maude Bouscambert-Duchamp, Florence Morfin-Sherpa, Martine Valette, Bruno Lina, Laurence Josset  
EPI\_ISL\_420623 hCoV-19/France/ARA13095/2020 Europe / France / ARA / Lyon 2020-03-24 Institut des  
Agents Infectieux (IAI), Hospices Civils de Lyon CNR Virus des Infections Respiratoires - France SUD  
Antonin Bal, Gregory Destras, Gwendolyne Burfin, Solenne Brun, Carine Moustaud, Raphaelle Lamy, Alexandre  
Gaynard, Maude Bouscambert-Duchamp, Florence Morfin-Sherpa, Martine Valette, Bruno Lina, Laurence Josset  
EPI\_ISL\_420624 hCoV-19/France/ARA13160/2020 Europe / France / ARA / Lyon 2020-03-24 Institut des  
Agents Infectieux (IAI), Hospices Civils de Lyon CNR Virus des Infections Respiratoires - France SUD  
Antonin Bal, Gregory Destras, Gwendolyne Burfin, Solenne Brun, Carine Moustaud, Raphaelle Lamy, Alexandre  
Gaynard, Maude Bouscambert-Duchamp, Florence Morfin-Sherpa, Martine Valette, Bruno Lina, Laurence Josset  
EPI\_ISL\_420625 hCoV-19/France/ARA1322/2020 Europe / France / ARA / Lyon 2020-03-24 Institut des  
Agents Infectieux (IAI), Hospices Civils de Lyon CNR Virus des Infections Respiratoires - France SUD  
Antonin Bal, Gregory Destras, Gwendolyne Burfin, Solenne Brun, Carine Moustaud, Raphaelle Lamy, Alexandre  
Gaynard, Maude Bouscambert-Duchamp, Florence Morfin-Sherpa, Martine Valette, Bruno Lina, Laurence Josset  
EPI\_ISL\_420628 hCoV-19/USA/VA-DCLS-0024/2020 North America / USA / Virginia 2020-03-13 Virginia DCLS  
Virginia DCLS Virginia DCLS  
EPI\_ISL\_420629 hCoV-19/USA/VA-DCLS-0034/2020 North America / USA / Virginia 2020-03-20 Virginia DCLS  
Virginia DCLS Virginia DCLS  
EPI\_ISL\_420630 hCoV-19/USA/VA-DCLS-0038/2020 North America / USA / Virginia 2020-03-23 Virginia DCLS  
Virginia DCLS Virginia DCLS  
EPI\_ISL\_420633 hCoV-19/England/20130055502/2020 Europe / United Kingdom / England 2020-03-19  
Respiratory Virus Unit, Microbiology Services Colindale, Public Health England Respiratory Virus Unit,  
Microbiology Services Colindale, Public Health England Monica Galiano, Shahjahan Miah, Angie Lackenby, Omolola  
Akinbami, Tiina Talts, Leena Bhaw, Richard Myers, Steven Platt, Kirstin Edwards, Jonathan Hubb, Joanna Ellis,  
Maria Zambon  
EPI\_ISL\_420636 hCoV-19/England/20136085404/2020 Europe / United Kingdom / England 2020-03-24  
Respiratory Virus Unit, Microbiology Services Colindale, Public Health England Respiratory Virus Unit,  
Microbiology Services Colindale, Public Health England Monica Galiano, Shahjahan Miah, Angie Lackenby, Omolola  
Akinbami, Tiina Talts, Leena Bhaw, Richard Myers, Steven Platt, Kirstin Edwards, Jonathan Hubb, Joanna Ellis,  
Maria Zambon  
EPI\_ISL\_420640 hCoV-19/England/20136088602/2020 Europe / United Kingdom / England 2020-03-23  
Respiratory Virus Unit, Microbiology Services Colindale, Public Health England Respiratory Virus Unit,  
Microbiology Services Colindale, Public Health England Monica Galiano, Shahjahan Miah, Angie Lackenby, Omolola  
Akinbami, Tiina Talts, Leena Bhaw, Richard Myers, Steven Platt, Kirstin Edwards, Jonathan Hubb, Joanna Ellis,  
Maria Zambon  
EPI\_ISL\_420642 hCoV-19/England/20136089402/2020 Europe / United Kingdom / England 2020-03-23  
Respiratory Virus Unit, Microbiology Services Colindale, Public Health England Respiratory Virus Unit,  
Microbiology Services Colindale, Public Health England Monica Galiano, Shahjahan Miah, Angie Lackenby, Omolola  
Akinbami, Tiina Talts, Leena Bhaw, Richard Myers, Steven Platt, Kirstin Edwards, Jonathan Hubb, Joanna Ellis,  
Maria Zambon  
EPI\_ISL\_420643 hCoV-19/England/20136094704/2020 Europe / United Kingdom / England 2020-03-26  
Respiratory Virus Unit, Microbiology Services Colindale, Public Health England Respiratory Virus Unit,  
Microbiology Services Colindale, Public Health England Monica Galiano, Shahjahan Miah, Angie Lackenby, Omolola  
Akinbami, Tiina Talts, Leena Bhaw, Richard Myers, Steven Platt, Kirstin Edwards, Jonathan Hubb, Joanna Ellis,  
Maria Zambon  
EPI\_ISL\_420648 hCoV-19/England/20136096504/2020 Europe / United Kingdom / England 2020-03-23  
Respiratory Virus Unit, Microbiology Services Colindale, Public Health England Respiratory Virus Unit,  
Microbiology Services Colindale, Public Health England Monica Galiano, Shahjahan Miah, Angie Lackenby, Omolola  
Akinbami, Tiina Talts, Leena Bhaw, Richard Myers, Steven Platt, Kirstin Edwards, Jonathan Hubb, Joanna Ellis,  
Maria Zambon  
EPI\_ISL\_420652 hCoV-19/England/20136097204/2020 Europe / United Kingdom / England 2020-03-23  
Respiratory Virus Unit, Microbiology Services Colindale, Public Health England Respiratory Virus Unit,  
Microbiology Services Colindale, Public Health England Monica Galiano, Shahjahan Miah, Angie Lackenby, Omolola  
Akinbami, Tiina Talts, Leena Bhaw, Richard Myers, Steven Platt, Kirstin Edwards, Jonathan Hubb, Joanna Ellis,  
Maria Zambon







EPI\_ISL\_20144065604/2020 Europe / United Kingdom / England 2020-03-31  
Respiratory Virus Unit, Microbiology Services Colindale, Public Health England Respiratory Virus Unit,  
Microbiology Services Colindale, Public Health England Monica Galiano, Shahjahan Miah, Angie Lackenby, Omolola  
Akinbami, Tiina Talts, Leena Bhaw, Richard Myers, Steven Platt, Kirstin Edwards, Jonathan Hubb, Joanna Ellis,  
Maria Zambon

EPI\_ISL\_421957 hCoV-19/England/20144067504/2020 Europe / United Kingdom / England 2020-03-20  
Respiratory Virus Unit, Microbiology Services Colindale, Public Health England Respiratory Virus Unit,  
Microbiology Services Colindale, Public Health England Monica Galiano, Shahjahan Miah, Angie Lackenby, Omolola  
Akinbami, Tiina Talts, Leena Bhaw, Richard Myers, Steven Platt, Kirstin Edwards, Jonathan Hubb, Joanna Ellis,  
Maria Zambon

EPI\_ISL\_421958 hCoV-19/England/20144071004/2020 Europe / United Kingdom / England 2020-04-01  
Respiratory Virus Unit, Microbiology Services Colindale, Public Health England Respiratory Virus Unit,  
Microbiology Services Colindale, Public Health England Monica Galiano, Shahjahan Miah, Angie Lackenby, Omolola  
Akinbami, Tiina Talts, Leena Bhaw, Richard Myers, Steven Platt, Kirstin Edwards, Jonathan Hubb, Joanna Ellis,  
Maria Zambon

EPI\_ISL\_421962 hCoV-19/England/20144072804/2020 Europe / United Kingdom / England 2020-04-01  
Respiratory Virus Unit, Microbiology Services Colindale, Public Health England Respiratory Virus Unit,  
Microbiology Services Colindale, Public Health England Monica Galiano, Shahjahan Miah, Angie Lackenby, Omolola  
Akinbami, Tiina Talts, Leena Bhaw, Richard Myers, Steven Platt, Kirstin Edwards, Jonathan Hubb, Joanna Ellis,  
Maria Zambon

EPI\_ISL\_421963 hCoV-19/England/20144074804/2020 Europe / United Kingdom / England 2020-04-01  
Respiratory Virus Unit, Microbiology Services Colindale, Public Health England Respiratory Virus Unit,  
Microbiology Services Colindale, Public Health England Monica Galiano, Shahjahan Miah, Angie Lackenby, Omolola  
Akinbami, Tiina Talts, Leena Bhaw, Richard Myers, Steven Platt, Kirstin Edwards, Jonathan Hubb, Joanna Ellis,  
Maria Zambon

EPI\_ISL\_421964 hCoV-19/England/20144076304/2020 Europe / United Kingdom / England 2020-04-01  
Respiratory Virus Unit, Microbiology Services Colindale, Public Health England Respiratory Virus Unit,  
Microbiology Services Colindale, Public Health England Monica Galiano, Shahjahan Miah, Angie Lackenby, Omolola  
Akinbami, Tiina Talts, Leena Bhaw, Richard Myers, Steven Platt, Kirstin Edwards, Jonathan Hubb, Joanna Ellis,  
Maria Zambon

EPI\_ISL\_421982 hCoV-19/England/20146019704/2020 Europe / United Kingdom / England 2020-04-01  
Respiratory Virus Unit, Microbiology Services Colindale, Public Health England Respiratory Virus Unit,  
Microbiology Services Colindale, Public Health England Monica Galiano, Shahjahan Miah, Angie Lackenby, Omolola  
Akinbami, Tiina Talts, Leena Bhaw, Richard Myers, Steven Platt, Kirstin Edwards, Jonathan Hubb, Joanna Ellis,  
Maria Zambon

EPI\_ISL\_422039 hCoV-19/Wales/PHWC-25779/2020 Europe / United Kingdom / Wales 2020-03-24 Wales  
Specialist Virology Centre Public Health Wales Microbiology Cardiff Catherine Moore, Johnathan  
Evans, Malorie Perry, Simon Cottrell, Alec Birchley, Alexander Adams, Amy Gaskin, Bree Gatica-Wilcox, Jason  
Coombes, Lauren Gilbert, Lee Graham, Nicole Pacchiarini, Sara Kumziene-Summerhayes, Sarah Taylor, Sophie Jones,  
Sara Rey, Matthew Bull, Joanne Watkins, Sally Corden, Tom Connor

EPI\_ISL\_422040 hCoV-19/Wales/PHWC-26D1C/2020 Europe / United Kingdom / Wales 2020-03-30 Wales  
Specialist Virology Centre Public Health Wales Microbiology Cardiff Catherine Moore, Johnathan  
Evans, Malorie Perry, Simon Cottrell, Alec Birchley, Alexander Adams, Amy Gaskin, Bree Gatica-Wilcox, Jason  
Coombes, Lauren Gilbert, Lee Graham, Nicole Pacchiarini, Sara Kumziene-Summerhayes, Sarah Taylor, Sophie Jones,  
Sara Rey, Matthew Bull, Joanne Watkins, Sally Corden, Tom Connor

EPI\_ISL\_422041 hCoV-19/Wales/PHWC-25C3E/2020 Europe / United Kingdom / Wales 2020-03-25 Wales  
Specialist Virology Centre Public Health Wales Microbiology Cardiff Catherine Moore, Johnathan  
Evans, Malorie Perry, Simon Cottrell, Alec Birchley, Alexander Adams, Amy Gaskin, Bree Gatica-Wilcox, Jason  
Coombes, Lauren Gilbert, Lee Graham, Nicole Pacchiarini, Sara Kumziene-Summerhayes, Sarah Taylor, Sophie Jones,  
Sara Rey, Matthew Bull, Joanne Watkins, Sally Corden, Tom Connor

EPI\_ISL\_422042 hCoV-19/Wales/PHWC-264BD/2020 Europe / United Kingdom / Wales 2020-03-28 Wales  
Specialist Virology Centre Public Health Wales Microbiology Cardiff Catherine Moore, Johnathan  
Evans, Malorie Perry, Simon Cottrell, Alec Birchley, Alexander Adams, Amy Gaskin, Bree Gatica-Wilcox, Jason  
Coombes, Lauren Gilbert, Lee Graham, Nicole Pacchiarini, Sara Kumziene-Summerhayes, Sarah Taylor, Sophie Jones,  
Sara Rey, Matthew Bull, Joanne Watkins, Sally Corden, Tom Connor

EPI\_ISL\_422043 hCoV-19/Wales/PHWC-269DC/2020 Europe / United Kingdom / Wales 2020-03-29 Wales  
Specialist Virology Centre Public Health Wales Microbiology Cardiff Catherine Moore, Johnathan  
Evans, Malorie Perry, Simon Cottrell, Alec Birchley, Alexander Adams, Amy Gaskin, Bree Gatica-Wilcox, Jason  
Coombes, Lauren Gilbert, Lee Graham, Nicole Pacchiarini, Sara Kumziene-Summerhayes, Sarah Taylor, Sophie Jones,  
Sara Rey, Matthew Bull, Joanne Watkins, Sally Corden, Tom Connor

EPI\_ISL\_422044 hCoV-19/Wales/PHWC-26E19/2020 Europe / United Kingdom / Wales 2020-03-29 Wales  
Specialist Virology Centre Public Health Wales Microbiology Cardiff Catherine Moore, Johnathan  
Evans, Malorie Perry, Simon Cottrell, Alec Birchley, Alexander Adams, Amy Gaskin, Bree Gatica-Wilcox, Jason  
Coombes, Lauren Gilbert, Lee Graham, Nicole Pacchiarini, Sara Kumziene-Summerhayes, Sarah Taylor, Sophie Jones,  
Sara Rey, Matthew Bull, Joanne Watkins, Sally Corden, Tom Connor

EPI\_ISL\_422045 hCoV-19/Wales/PHWC-25AF8/2020 Europe / United Kingdom / Wales 2020-03-24 Wales  
Specialist Virology Centre Public Health Wales Microbiology Cardiff Catherine Moore, Johnathan  
Evans, Malorie Perry, Simon Cottrell, Alec Birchley, Alexander Adams, Amy Gaskin, Bree Gatica-Wilcox, Jason  
Coombes, Lauren Gilbert, Lee Graham, Nicole Pacchiarini, Sara Kumziene-Summerhayes, Sarah Taylor, Sophie Jones,  
Sara Rey, Matthew Bull, Joanne Watkins, Sally Corden, Tom Connor









EPI\_ISL\_422088 hCoV-19/Wales/PHWC-26DC1/2020 Europe / United Kingdom / Wales 2020-03-30 Wales  
Specialist Virology Centre Public Health Wales Microbiology Cardiff Catherine Moore, Johnathan  
Evans, Malorie Perry, Simon Cottrell, Alec Birchley, Alexander Adams, Amy Gaskin, Bree Gatica-Wilcox, Jason  
Coombes, Lauren Gilbert, Lee Graham, Nicole Pacchiarini, Sara Kumziene-Summerhayes, Sarah Taylor, Sophie Jones,  
Sara Rey, Matthew Bull, Joanne Watkins, Sally Corden, Tom Connor

EPI\_ISL\_422089 hCoV-19/Wales/PHWC-26DA3/2020 Europe / United Kingdom / Wales 2020-03-30 Wales  
Specialist Virology Centre Public Health Wales Microbiology Cardiff Catherine Moore, Johnathan  
Evans, Malorie Perry, Simon Cottrell, Alec Birchley, Alexander Adams, Amy Gaskin, Bree Gatica-Wilcox, Jason  
Coombes, Lauren Gilbert, Lee Graham, Nicole Pacchiarini, Sara Kumziene-Summerhayes, Sarah Taylor, Sophie Jones,  
Sara Rey, Matthew Bull, Joanne Watkins, Sally Corden, Tom Connor

EPI\_ISL\_422090 hCoV-19/Wales/PHWC-26ECE/2020 Europe / United Kingdom / Wales 2020-03-30 Wales  
Specialist Virology Centre Public Health Wales Microbiology Cardiff Catherine Moore, Johnathan  
Evans, Malorie Perry, Simon Cottrell, Alec Birchley, Alexander Adams, Amy Gaskin, Bree Gatica-Wilcox, Jason  
Coombes, Lauren Gilbert, Lee Graham, Nicole Pacchiarini, Sara Kumziene-Summerhayes, Sarah Taylor, Sophie Jones,  
Sara Rey, Matthew Bull, Joanne Watkins, Sally Corden, Tom Connor

EPI\_ISL\_422091 hCoV-19/Wales/PHWC-264DB/2020 Europe / United Kingdom / Wales 2020-03-28 Wales  
Specialist Virology Centre Public Health Wales Microbiology Cardiff Catherine Moore, Johnathan  
Evans, Malorie Perry, Simon Cottrell, Alec Birchley, Alexander Adams, Amy Gaskin, Bree Gatica-Wilcox, Jason  
Coombes, Lauren Gilbert, Lee Graham, Nicole Pacchiarini, Sara Kumziene-Summerhayes, Sarah Taylor, Sophie Jones,  
Sara Rey, Matthew Bull, Joanne Watkins, Sally Corden, Tom Connor

EPI\_ISL\_422092 hCoV-19/Wales/PHWC-26857/2020 Europe / United Kingdom / Wales 2020-03-27 Wales  
Specialist Virology Centre Public Health Wales Microbiology Cardiff Catherine Moore, Johnathan  
Evans, Malorie Perry, Simon Cottrell, Alec Birchley, Alexander Adams, Amy Gaskin, Bree Gatica-Wilcox, Jason  
Coombes, Lauren Gilbert, Lee Graham, Nicole Pacchiarini, Sara Kumziene-Summerhayes, Sarah Taylor, Sophie Jones,  
Sara Rey, Matthew Bull, Joanne Watkins, Sally Corden, Tom Connor

EPI\_ISL\_422093 hCoV-19/Wales/PHWC-2707C/2020 Europe / United Kingdom / Wales 2020-03-29 Wales  
Specialist Virology Centre Public Health Wales Microbiology Cardiff Catherine Moore, Johnathan  
Evans, Malorie Perry, Simon Cottrell, Alec Birchley, Alexander Adams, Amy Gaskin, Bree Gatica-Wilcox, Jason  
Coombes, Lauren Gilbert, Lee Graham, Nicole Pacchiarini, Sara Kumziene-Summerhayes, Sarah Taylor, Sophie Jones,  
Sara Rey, Matthew Bull, Joanne Watkins, Sally Corden, Tom Connor

EPI\_ISL\_422094 hCoV-19/Wales/PHWC-2617A/2020 Europe / United Kingdom / Wales 2020-03-25 Wales  
Specialist Virology Centre Public Health Wales Microbiology Cardiff Catherine Moore, Johnathan  
Evans, Malorie Perry, Simon Cottrell, Alec Birchley, Alexander Adams, Amy Gaskin, Bree Gatica-Wilcox, Jason  
Coombes, Lauren Gilbert, Lee Graham, Nicole Pacchiarini, Sara Kumziene-Summerhayes, Sarah Taylor, Sophie Jones,  
Sara Rey, Matthew Bull, Joanne Watkins, Sally Corden, Tom Connor

EPI\_ISL\_422095 hCoV-19/Wales/PHWC-2705E/2020 Europe / United Kingdom / Wales 2020-03-28 Wales  
Specialist Virology Centre Public Health Wales Microbiology Cardiff Catherine Moore, Johnathan  
Evans, Malorie Perry, Simon Cottrell, Alec Birchley, Alexander Adams, Amy Gaskin, Bree Gatica-Wilcox, Jason  
Coombes, Lauren Gilbert, Lee Graham, Nicole Pacchiarini, Sara Kumziene-Summerhayes, Sarah Taylor, Sophie Jones,  
Sara Rey, Matthew Bull, Joanne Watkins, Sally Corden, Tom Connor

EPI\_ISL\_422096 hCoV-19/Wales/PHWC-2675A/2020 Europe / United Kingdom / Wales 2020-03-28 Wales  
Specialist Virology Centre Public Health Wales Microbiology Cardiff Catherine Moore, Johnathan  
Evans, Malorie Perry, Simon Cottrell, Alec Birchley, Alexander Adams, Amy Gaskin, Bree Gatica-Wilcox, Jason  
Coombes, Lauren Gilbert, Lee Graham, Nicole Pacchiarini, Sara Kumziene-Summerhayes, Sarah Taylor, Sophie Jones,  
Sara Rey, Matthew Bull, Joanne Watkins, Sally Corden, Tom Connor

EPI\_ISL\_422097 hCoV-19/Wales/PHWC-26D0D/2020 Europe / United Kingdom / Wales 2020-03-30 Wales  
Specialist Virology Centre Public Health Wales Microbiology Cardiff Catherine Moore, Johnathan  
Evans, Malorie Perry, Simon Cottrell, Alec Birchley, Alexander Adams, Amy Gaskin, Bree Gatica-Wilcox, Jason  
Coombes, Lauren Gilbert, Lee Graham, Nicole Pacchiarini, Sara Kumziene-Summerhayes, Sarah Taylor, Sophie Jones,  
Sara Rey, Matthew Bull, Joanne Watkins, Sally Corden, Tom Connor

EPI\_ISL\_422098 hCoV-19/Wales/PHWC-26848/2020 Europe / United Kingdom / Wales 2020-03-27 Wales  
Specialist Virology Centre Public Health Wales Microbiology Cardiff Catherine Moore, Johnathan  
Evans, Malorie Perry, Simon Cottrell, Alec Birchley, Alexander Adams, Amy Gaskin, Bree Gatica-Wilcox, Jason  
Coombes, Lauren Gilbert, Lee Graham, Nicole Pacchiarini, Sara Kumziene-Summerhayes, Sarah Taylor, Sophie Jones,  
Sara Rey, Matthew Bull, Joanne Watkins, Sally Corden, Tom Connor

EPI\_ISL\_422099 hCoV-19/Wales/PHWC-27021/2020 Europe / United Kingdom / Wales 2020-03-28 Wales  
Specialist Virology Centre Public Health Wales Microbiology Cardiff Catherine Moore, Johnathan  
Evans, Malorie Perry, Simon Cottrell, Alec Birchley, Alexander Adams, Amy Gaskin, Bree Gatica-Wilcox, Jason  
Coombes, Lauren Gilbert, Lee Graham, Nicole Pacchiarini, Sara Kumziene-Summerhayes, Sarah Taylor, Sophie Jones,  
Sara Rey, Matthew Bull, Joanne Watkins, Sally Corden, Tom Connor

EPI\_ISL\_423371 hCoV-19/England/20140002204/2020 Europe / United Kingdom / England 2020-03-29  
Respiratory Virus Unit, Microbiology Services Colindale, Public Health England Respiratory Virus Unit,  
Microbiology Services Colindale, Public Health England Monica Galiano, Shahjahan Miah, Angie Lackenby, Omolola  
Akinbami, Tiina Talts, Leena Bhaw, Richard Myers, Steven Platt, Kirstin Edwards, Jonathan Hubb, Joanna Ellis,  
Maria Zambon

EPI\_ISL\_423372 hCoV-19/England/20140002604/2020 Europe / United Kingdom / England 2020-03-28  
Respiratory Virus Unit, Microbiology Services Colindale, Public Health England Respiratory Virus Unit,  
Microbiology Services Colindale, Public Health England Monica Galiano, Shahjahan Miah, Angie Lackenby, Omolola  
Akinbami, Tiina Talts, Leena Bhaw, Richard Myers, Steven Platt, Kirstin Edwards, Jonathan Hubb, Joanna Ellis,  
Maria Zambon



|                                                                                                                                                                                                                                                                                                                                                        |                                  |                                   |            |                 |
|--------------------------------------------------------------------------------------------------------------------------------------------------------------------------------------------------------------------------------------------------------------------------------------------------------------------------------------------------------|----------------------------------|-----------------------------------|------------|-----------------|
| EPI_ISL_423398                                                                                                                                                                                                                                                                                                                                         | hCoV-19/England/20140066004/2020 | Europe / United Kingdom / England | 2020-03-29 |                 |
| Respiratory Virus Unit, Microbiology Services Colindale, Public Health England<br>Respiratory Virus Unit, Microbiology Services Colindale, Public Health England<br>Monica Galiano, Shahjahan Miah, Angie Lackenby, Omolola Akinbami, Tiina Talts, Leena Bhaw, Richard Myers, Steven Platt, Kirstin Edwards, Jonathan Hubb, Joanna Ellis, Maria Zambon |                                  |                                   |            |                 |
| EPI_ISL_423399                                                                                                                                                                                                                                                                                                                                         | hCoV-19/England/20140066204/2020 | Europe / United Kingdom / England | 2020-03-29 |                 |
| Respiratory Virus Unit, Microbiology Services Colindale, Public Health England<br>Respiratory Virus Unit, Microbiology Services Colindale, Public Health England<br>Monica Galiano, Shahjahan Miah, Angie Lackenby, Omolola Akinbami, Tiina Talts, Leena Bhaw, Richard Myers, Steven Platt, Kirstin Edwards, Jonathan Hubb, Joanna Ellis, Maria Zambon |                                  |                                   |            |                 |
| EPI_ISL_423400                                                                                                                                                                                                                                                                                                                                         | hCoV-19/England/20140068404/2020 | Europe / United Kingdom / England | 2020-03-30 |                 |
| Respiratory Virus Unit, Microbiology Services Colindale, Public Health England<br>Respiratory Virus Unit, Microbiology Services Colindale, Public Health England<br>Monica Galiano, Shahjahan Miah, Angie Lackenby, Omolola Akinbami, Tiina Talts, Leena Bhaw, Richard Myers, Steven Platt, Kirstin Edwards, Jonathan Hubb, Joanna Ellis, Maria Zambon |                                  |                                   |            |                 |
| EPI_ISL_423401                                                                                                                                                                                                                                                                                                                                         | hCoV-19/England/20140068904/2020 | Europe / United Kingdom / England | 2020-03-29 |                 |
| Respiratory Virus Unit, Microbiology Services Colindale, Public Health England<br>Respiratory Virus Unit, Microbiology Services Colindale, Public Health England<br>Monica Galiano, Shahjahan Miah, Angie Lackenby, Omolola Akinbami, Tiina Talts, Leena Bhaw, Richard Myers, Steven Platt, Kirstin Edwards, Jonathan Hubb, Joanna Ellis, Maria Zambon |                                  |                                   |            |                 |
| EPI_ISL_424101                                                                                                                                                                                                                                                                                                                                         | hCoV-19/England/20129126204/2020 | Europe / United Kingdom / England | 2020-03-12 |                 |
| Respiratory Virus Unit, Microbiology Services Colindale, Public Health England<br>Respiratory Virus Unit, Microbiology Services Colindale, Public Health England<br>Monica Galiano, Shahjahan Miah, Angie Lackenby, Omolola Akinbami, Tiina Talts, Leena Bhaw, Richard Myers, Steven Platt, Kirstin Edwards, Jonathan Hubb, Joanna Ellis, Maria Zambon |                                  |                                   |            |                 |
| EPI_ISL_424117                                                                                                                                                                                                                                                                                                                                         | hCoV-19/England/20129148904/2020 | Europe / United Kingdom / England | 2020-03-12 |                 |
| Respiratory Virus Unit, Microbiology Services Colindale, Public Health England<br>Respiratory Virus Unit, Microbiology Services Colindale, Public Health England<br>Monica Galiano, Shahjahan Miah, Angie Lackenby, Omolola Akinbami, Tiina Talts, Leena Bhaw, Richard Myers, Steven Platt, Kirstin Edwards, Jonathan Hubb, Joanna Ellis, Maria Zambon |                                  |                                   |            |                 |
| EPI_ISL_424119                                                                                                                                                                                                                                                                                                                                         | hCoV-19/England/20129158804/2020 | Europe / United Kingdom / England | 2020-03-21 |                 |
| Respiratory Virus Unit, Microbiology Services Colindale, Public Health England<br>Respiratory Virus Unit, Microbiology Services Colindale, Public Health England<br>Monica Galiano, Shahjahan Miah, Angie Lackenby, Omolola Akinbami, Tiina Talts, Leena Bhaw, Richard Myers, Steven Platt, Kirstin Edwards, Jonathan Hubb, Joanna Ellis, Maria Zambon |                                  |                                   |            |                 |
| EPI_ISL_424121                                                                                                                                                                                                                                                                                                                                         | hCoV-19/England/20129160704/2020 | Europe / United Kingdom / England | 2020-03-21 |                 |
| Respiratory Virus Unit, Microbiology Services Colindale, Public Health England<br>Respiratory Virus Unit, Microbiology Services Colindale, Public Health England<br>Monica Galiano, Shahjahan Miah, Angie Lackenby, Omolola Akinbami, Tiina Talts, Leena Bhaw, Richard Myers, Steven Platt, Kirstin Edwards, Jonathan Hubb, Joanna Ellis, Maria Zambon |                                  |                                   |            |                 |
| EPI_ISL_424126                                                                                                                                                                                                                                                                                                                                         | hCoV-19/England/20129163604/2020 | Europe / United Kingdom / England | 2020-03-21 |                 |
| Respiratory Virus Unit, Microbiology Services Colindale, Public Health England<br>Respiratory Virus Unit, Microbiology Services Colindale, Public Health England<br>Monica Galiano, Shahjahan Miah, Angie Lackenby, Omolola Akinbami, Tiina Talts, Leena Bhaw, Richard Myers, Steven Platt, Kirstin Edwards, Jonathan Hubb, Joanna Ellis, Maria Zambon |                                  |                                   |            |                 |
| EPI_ISL_424140                                                                                                                                                                                                                                                                                                                                         | hCoV-19/England/20129171604/2020 | Europe / United Kingdom / England | 2020-03-21 |                 |
| Respiratory Virus Unit, Microbiology Services Colindale, Public Health England<br>Respiratory Virus Unit, Microbiology Services Colindale, Public Health England<br>Monica Galiano, Shahjahan Miah, Angie Lackenby, Omolola Akinbami, Tiina Talts, Leena Bhaw, Richard Myers, Steven Platt, Kirstin Edwards, Jonathan Hubb, Joanna Ellis, Maria Zambon |                                  |                                   |            |                 |
| EPI_ISL_424152                                                                                                                                                                                                                                                                                                                                         | hCoV-19/England/20129174804/2020 | Europe / United Kingdom / England | 2020-03-20 |                 |
| Respiratory Virus Unit, Microbiology Services Colindale, Public Health England<br>Respiratory Virus Unit, Microbiology Services Colindale, Public Health England<br>Monica Galiano, Shahjahan Miah, Angie Lackenby, Omolola Akinbami, Tiina Talts, Leena Bhaw, Richard Myers, Steven Platt, Kirstin Edwards, Jonathan Hubb, Joanna Ellis, Maria Zambon |                                  |                                   |            |                 |
| EPI_ISL_424166                                                                                                                                                                                                                                                                                                                                         | hCoV-19/USA/WA-UW-1620/2020      | North America / USA / Washington  | 2020-03-19 | UW              |
| Virology Lab UW Virology Lab Pavitra Roychoudhury, Hong Xie, Keith Jerome, Alexander Greninger                                                                                                                                                                                                                                                         |                                  |                                   |            |                 |
| EPI_ISL_424167                                                                                                                                                                                                                                                                                                                                         | hCoV-19/USA/WA-UW-1616/2020      | North America / USA / Washington  | 2020-03-19 | UW              |
| Virology Lab UW Virology Lab Pavitra Roychoudhury, Hong Xie, Keith Jerome, Alexander Greninger                                                                                                                                                                                                                                                         |                                  |                                   |            |                 |
| EPI_ISL_424169                                                                                                                                                                                                                                                                                                                                         | hCoV-19/USA/WA-UW-1538/2020      | North America / USA / Washington  | 2020-03-19 | UW              |
| Virology Lab UW Virology Lab Pavitra Roychoudhury, Hong Xie, Keith Jerome, Alexander Greninger                                                                                                                                                                                                                                                         |                                  |                                   |            |                 |
| EPI_ISL_424170                                                                                                                                                                                                                                                                                                                                         | hCoV-19/USA/WA-UW-1595/2020      | North America / USA / Washington  | 2020-03-19 | UW              |
| Virology Lab UW Virology Lab Pavitra Roychoudhury, Hong Xie, Keith Jerome, Alexander Greninger                                                                                                                                                                                                                                                         |                                  |                                   |            |                 |
| EPI_ISL_424172                                                                                                                                                                                                                                                                                                                                         | hCoV-19/USA/WA-UW-1575/2020      | North America / USA / Washington  | 2020-03-19 | UW              |
| Virology Lab UW Virology Lab Pavitra Roychoudhury, Hong Xie, Keith Jerome, Alexander Greninger                                                                                                                                                                                                                                                         |                                  |                                   |            |                 |
| EPI_ISL_424173                                                                                                                                                                                                                                                                                                                                         | hCoV-19/USA/IL-UW-1311/2020      | North America / USA / Illinois    | 2020-03-14 | UW Virology Lab |
| UW Virology Lab Pavitra Roychoudhury, Hong Xie, Keith Jerome, Alexander Greninger                                                                                                                                                                                                                                                                      |                                  |                                   |            |                 |
| EPI_ISL_424174                                                                                                                                                                                                                                                                                                                                         | hCoV-19/USA/CT-UW-1365/2020      | North America / USA / Connecticut | 2020-03-13 | UW              |
| Virology Lab UW Virology Lab Pavitra Roychoudhury, Hong Xie, Keith Jerome, Alexander Greninger                                                                                                                                                                                                                                                         |                                  |                                   |            |                 |
| EPI_ISL_424175                                                                                                                                                                                                                                                                                                                                         | hCoV-19/USA/WA-UW-1362/2020      | North America / USA / Washington  | 2020-03-17 | UW              |

|                                                                                                                                                                                            |                                                                                   |                                   |            |            |                    |
|--------------------------------------------------------------------------------------------------------------------------------------------------------------------------------------------|-----------------------------------------------------------------------------------|-----------------------------------|------------|------------|--------------------|
| Virology Lab                                                                                                                                                                               | UW Virology Lab Pavitra Roychoudhury, Hong Xie, Keith Jerome, Alexander Greninger |                                   |            |            |                    |
| EPI_ISL_424176                                                                                                                                                                             | hCoV-19/USA/WA-UW-1472/2020                                                       | North America / USA / Washington  |            | 2020-03-17 | UW                 |
| Virology Lab                                                                                                                                                                               | UW Virology Lab Pavitra Roychoudhury, Hong Xie, Keith Jerome, Alexander Greninger |                                   |            |            |                    |
| EPI_ISL_424178                                                                                                                                                                             | hCoV-19/USA/WA-UW-1342/2020                                                       | North America / USA / Washington  |            | 2020-03-17 | UW                 |
| Virology Lab                                                                                                                                                                               | UW Virology Lab Pavitra Roychoudhury, Hong Xie, Keith Jerome, Alexander Greninger |                                   |            |            |                    |
| EPI_ISL_424179                                                                                                                                                                             | hCoV-19/USA/WA-UW-1341/2020                                                       | North America / USA / Washington  |            | 2020-03-17 | UW                 |
| Virology Lab                                                                                                                                                                               | UW Virology Lab Pavitra Roychoudhury, Hong Xie, Keith Jerome, Alexander Greninger |                                   |            |            |                    |
| EPI_ISL_424180                                                                                                                                                                             | hCoV-19/USA/WA-UW-1294/2020                                                       | North America / USA / Washington  |            | 2020-03-18 | UW                 |
| Virology Lab                                                                                                                                                                               | UW Virology Lab Pavitra Roychoudhury, Hong Xie, Keith Jerome, Alexander Greninger |                                   |            |            |                    |
| EPI_ISL_424181                                                                                                                                                                             | hCoV-19/USA/UN-UW-1402/2020                                                       | North America / USA               | 2020-03-16 |            | UW Virology Lab UW |
| Virology Lab                                                                                                                                                                               | Pavitra Roychoudhury, Hong Xie, Keith Jerome, Alexander Greninger                 |                                   |            |            |                    |
| EPI_ISL_424182                                                                                                                                                                             | hCoV-19/USA/WA-UW-1478/2020                                                       | North America / USA / Washington  |            | 2020-03-18 | UW                 |
| Virology Lab                                                                                                                                                                               | UW Virology Lab Pavitra Roychoudhury, Hong Xie, Keith Jerome, Alexander Greninger |                                   |            |            |                    |
| EPI_ISL_424183                                                                                                                                                                             | hCoV-19/USA/WA-UW-1436/2020                                                       | North America / USA / Washington  |            | 2020-03-18 | UW                 |
| Virology Lab                                                                                                                                                                               | UW Virology Lab Pavitra Roychoudhury, Hong Xie, Keith Jerome, Alexander Greninger |                                   |            |            |                    |
| EPI_ISL_424184                                                                                                                                                                             | hCoV-19/USA/WA-UW-1422/2020                                                       | North America / USA / Washington  |            | 2020-03-18 | UW                 |
| Virology Lab                                                                                                                                                                               | UW Virology Lab Pavitra Roychoudhury, Hong Xie, Keith Jerome, Alexander Greninger |                                   |            |            |                    |
| EPI_ISL_424186                                                                                                                                                                             | hCoV-19/USA/WA-UW-1644/2020                                                       | North America / USA / Washington  |            | 2020-03-20 | UW                 |
| Virology Lab                                                                                                                                                                               | UW Virology Lab Pavitra Roychoudhury, Hong Xie, Keith Jerome, Alexander Greninger |                                   |            |            |                    |
| EPI_ISL_424187                                                                                                                                                                             | hCoV-19/USA/WA-UW-1646/2020                                                       | North America / USA / Washington  |            | 2020-03-20 | UW                 |
| Virology Lab                                                                                                                                                                               | UW Virology Lab Pavitra Roychoudhury, Hong Xie, Keith Jerome, Alexander Greninger |                                   |            |            |                    |
| EPI_ISL_424188                                                                                                                                                                             | hCoV-19/USA/WA-UW-1645/2020                                                       | North America / USA / Washington  |            | 2020-03-20 | UW                 |
| Virology Lab                                                                                                                                                                               | UW Virology Lab Pavitra Roychoudhury, Hong Xie, Keith Jerome, Alexander Greninger |                                   |            |            |                    |
| EPI_ISL_424189                                                                                                                                                                             | hCoV-19/USA/UN-UW-Not found/2020                                                  | North America / USA               | 2020-03    |            | UW Virology Lab UW |
| Virology Lab                                                                                                                                                                               | Pavitra Roychoudhury, Hong Xie, Keith Jerome, Alexander Greninger                 |                                   |            |            |                    |
| EPI_ISL_424191                                                                                                                                                                             | hCoV-19/USA/WA-UW-1683/2020                                                       | North America / USA / Washington  |            | 2020-03-20 | UW                 |
| Virology Lab                                                                                                                                                                               | UW Virology Lab Pavitra Roychoudhury, Hong Xie, Keith Jerome, Alexander Greninger |                                   |            |            |                    |
| EPI_ISL_424192                                                                                                                                                                             | hCoV-19/USA/WA-UW-1688/2020                                                       | North America / USA / Washington  |            | 2020-03-20 | UW                 |
| Virology Lab                                                                                                                                                                               | UW Virology Lab Pavitra Roychoudhury, Hong Xie, Keith Jerome, Alexander Greninger |                                   |            |            |                    |
| EPI_ISL_424193                                                                                                                                                                             | hCoV-19/USA/WA-UW-1728/2020                                                       | North America / USA / Washington  |            | 2020-03-21 | UW                 |
| Virology Lab                                                                                                                                                                               | UW Virology Lab Pavitra Roychoudhury, Hong Xie, Keith Jerome, Alexander Greninger |                                   |            |            |                    |
| EPI_ISL_424194                                                                                                                                                                             | hCoV-19/USA/WA-UW-1661/2020                                                       | North America / USA / Washington  |            | 2020-03-20 | UW                 |
| Virology Lab                                                                                                                                                                               | UW Virology Lab Pavitra Roychoudhury, Hong Xie, Keith Jerome, Alexander Greninger |                                   |            |            |                    |
| EPI_ISL_424195                                                                                                                                                                             | hCoV-19/USA/WA-UW-1726/2020                                                       | North America / USA / Washington  |            | 2020-03-21 | UW                 |
| Virology Lab                                                                                                                                                                               | UW Virology Lab Pavitra Roychoudhury, Hong Xie, Keith Jerome, Alexander Greninger |                                   |            |            |                    |
| EPI_ISL_424196                                                                                                                                                                             | hCoV-19/USA/WA-UW-1666/2020                                                       | North America / USA / Washington  |            | 2020-03-20 | UW                 |
| Virology Lab                                                                                                                                                                               | UW Virology Lab Pavitra Roychoudhury, Hong Xie, Keith Jerome, Alexander Greninger |                                   |            |            |                    |
| EPI_ISL_424197                                                                                                                                                                             | hCoV-19/USA/WA-UW-1640/2020                                                       | North America / USA / Washington  |            | 2020-03-20 | UW                 |
| Virology Lab                                                                                                                                                                               | UW Virology Lab Pavitra Roychoudhury, Hong Xie, Keith Jerome, Alexander Greninger |                                   |            |            |                    |
| EPI_ISL_424198                                                                                                                                                                             | hCoV-19/USA/WA-UW-1656/2020                                                       | North America / USA / Washington  |            | 2020-03-20 | UW                 |
| Virology Lab                                                                                                                                                                               | UW Virology Lab Pavitra Roychoudhury, Hong Xie, Keith Jerome, Alexander Greninger |                                   |            |            |                    |
| EPI_ISL_424703                                                                                                                                                                             | hCoV-19/Sweden/RV-FOI-1/2020                                                      | Europe / Sweden / Vasterbotten    | 2020-03-15 |            | Klinisk            |
| mikrobiologi, Region Västerbotten                                                                                                                                                          | Unit for Biological Agents, Department for CBRN Defence and Security,             |                                   |            |            |                    |
| Swedish Defence Research Agency                                                                                                                                                            | FOI Bioinformatics team                                                           |                                   |            |            |                    |
| EPI_ISL_425300                                                                                                                                                                             | hCoV-19/England/CAMB-74508/2020                                                   | Europe / United Kingdom / England |            | 2020-03-28 |                    |
| Department of Pathology, University of Cambridge                                                                                                                                           | COVID-19 Genomics UK (COG-UK) Consortium                                          |                                   |            |            | Luke W             |
| Meredith, M. Estee Torok , Myra Hosmillo, William L. Hamilton, Martin D. Curran, Theresa Feltwell, Anna Yakovleva, Charlotte J. Houldcroft, Aminu S. Jahun, Sarah L. Caddy, Ian Goodfellow |                                                                                   |                                   |            |            |                    |
| EPI_ISL_425304                                                                                                                                                                             | hCoV-19/England/CAMB-74544/2020                                                   | Europe / United Kingdom / England |            | 2020-03-28 |                    |
| Department of Pathology, University of Cambridge                                                                                                                                           | COVID-19 Genomics UK (COG-UK) Consortium                                          |                                   |            |            | Luke W             |
| Meredith, M. Estee Torok , Myra Hosmillo, William L. Hamilton, Martin D. Curran, Theresa Feltwell, Anna Yakovleva, Charlotte J. Houldcroft, Aminu S. Jahun, Sarah L. Caddy, Ian Goodfellow |                                                                                   |                                   |            |            |                    |
| EPI_ISL_425305                                                                                                                                                                             | hCoV-19/England/CAMB-74553/2020                                                   | Europe / United Kingdom / England |            | 2020-03-28 |                    |
| Department of Pathology, University of Cambridge                                                                                                                                           | COVID-19 Genomics UK (COG-UK) Consortium                                          |                                   |            |            | Luke W             |
| Meredith, M. Estee Torok , Myra Hosmillo, William L. Hamilton, Martin D. Curran, Theresa Feltwell, Anna Yakovleva, Charlotte J. Houldcroft, Aminu S. Jahun, Sarah L. Caddy, Ian Goodfellow |                                                                                   |                                   |            |            |                    |
| EPI_ISL_425423                                                                                                                                                                             | hCoV-19/England/CAMB-76D1D/2020                                                   | Europe / United Kingdom / England |            | 2020-03-30 |                    |
| Department of Pathology, University of Cambridge                                                                                                                                           | COVID-19 Genomics UK (COG-UK) Consortium                                          |                                   |            |            | Luke W             |
| Meredith, M. Estee Torok , Myra Hosmillo, William L. Hamilton, Martin D. Curran, Theresa Feltwell, Anna Yakovleva, Charlotte J. Houldcroft, Aminu S. Jahun, Sarah L. Caddy, Ian Goodfellow |                                                                                   |                                   |            |            |                    |
| EPI_ISL_425424                                                                                                                                                                             | hCoV-19/England/CAMB-76D3B/2020                                                   | Europe / United Kingdom / England |            | 2020-03-31 |                    |
| Department of Pathology, University of Cambridge                                                                                                                                           | COVID-19 Genomics UK (COG-UK) Consortium                                          |                                   |            |            | Luke W             |
| Meredith, M. Estee Torok , Myra Hosmillo, William L. Hamilton, Martin D. Curran, Theresa Feltwell, Anna Yakovleva, Charlotte J. Houldcroft, Aminu S. Jahun, Sarah L. Caddy, Ian Goodfellow |                                                                                   |                                   |            |            |                    |
| EPI_ISL_425425                                                                                                                                                                             | hCoV-19/England/CAMB-76D59/2020                                                   | Europe / United Kingdom / England |            | 2020-03-30 |                    |
| Department of Pathology, University of Cambridge                                                                                                                                           | COVID-19 Genomics UK (COG-UK) Consortium                                          |                                   |            |            | Luke W             |
| Meredith, M. Estee Torok , Myra Hosmillo, William L. Hamilton, Martin D. Curran, Theresa Feltwell, Anna Yakovleva, Charlotte J. Houldcroft, Aminu S. Jahun, Sarah L. Caddy, Ian Goodfellow |                                                                                   |                                   |            |            |                    |
| EPI_ISL_425427                                                                                                                                                                             | hCoV-19/England/CAMB-76D95/2020                                                   | Europe / United Kingdom / England |            | 2020-03-31 |                    |
| Department of Pathology, University of Cambridge                                                                                                                                           | COVID-19 Genomics UK (COG-UK) Consortium                                          |                                   |            |            | Luke W             |





|                                                                                                                                                                                                                                                     |                                  |                                   |            |
|-----------------------------------------------------------------------------------------------------------------------------------------------------------------------------------------------------------------------------------------------------|----------------------------------|-----------------------------------|------------|
| EPI_ISL_425453                                                                                                                                                                                                                                      | hCoV-19/England/CAMB-77031/2020  | Europe / United Kingdom / England | 2020-04-01 |
| Department of Pathology, University of Cambridge COVID-19 Genomics UK (COG-UK) Consortium Luke W                                                                                                                                                    |                                  |                                   |            |
| Meredith, M. Estee Torok , Myra Hosmillo, William L. Hamilton, Martin D. Curran, Theresa Feltwell, Anna Yakovleva, Charlotte J. Houldcroft, Aminu S. Jahun, Sarah L. Caddy, Ian Goodfellow                                                          |                                  |                                   |            |
| EPI_ISL_425454                                                                                                                                                                                                                                      | hCoV-19/England/CAMB-77040/2020  | Europe / United Kingdom / England | 2020-03-31 |
| Department of Pathology, University of Cambridge COVID-19 Genomics UK (COG-UK) Consortium Luke W                                                                                                                                                    |                                  |                                   |            |
| Meredith, M. Estee Torok , Myra Hosmillo, William L. Hamilton, Martin D. Curran, Theresa Feltwell, Anna Yakovleva, Charlotte J. Houldcroft, Aminu S. Jahun, Sarah L. Caddy, Ian Goodfellow                                                          |                                  |                                   |            |
| EPI_ISL_425455                                                                                                                                                                                                                                      | hCoV-19/England/CAMB-7705F/2020  | Europe / United Kingdom / England | 2020-03-31 |
| Department of Pathology, University of Cambridge COVID-19 Genomics UK (COG-UK) Consortium Luke W                                                                                                                                                    |                                  |                                   |            |
| Meredith, M. Estee Torok , Myra Hosmillo, William L. Hamilton, Martin D. Curran, Theresa Feltwell, Anna Yakovleva, Charlotte J. Houldcroft, Aminu S. Jahun, Sarah L. Caddy, Ian Goodfellow                                                          |                                  |                                   |            |
| EPI_ISL_425457                                                                                                                                                                                                                                      | hCoV-19/England/CAMB-7707D/2020  | Europe / United Kingdom / England | 2020-04-01 |
| Department of Pathology, University of Cambridge COVID-19 Genomics UK (COG-UK) Consortium Luke W                                                                                                                                                    |                                  |                                   |            |
| Meredith, M. Estee Torok , Myra Hosmillo, William L. Hamilton, Martin D. Curran, Theresa Feltwell, Anna Yakovleva, Charlotte J. Houldcroft, Aminu S. Jahun, Sarah L. Caddy, Ian Goodfellow                                                          |                                  |                                   |            |
| EPI_ISL_425458                                                                                                                                                                                                                                      | hCoV-19/England/CAMB-7708C/2020  | Europe / United Kingdom / England | 2020-03-31 |
| Department of Pathology, University of Cambridge COVID-19 Genomics UK (COG-UK) Consortium Luke W                                                                                                                                                    |                                  |                                   |            |
| Meredith, M. Estee Torok , Myra Hosmillo, William L. Hamilton, Martin D. Curran, Theresa Feltwell, Anna Yakovleva, Charlotte J. Houldcroft, Aminu S. Jahun, Sarah L. Caddy, Ian Goodfellow                                                          |                                  |                                   |            |
| EPI_ISL_425460                                                                                                                                                                                                                                      | hCoV-19/England/CAMB-770B9/2020  | Europe / United Kingdom / England | 2020-03-31 |
| Department of Pathology, University of Cambridge COVID-19 Genomics UK (COG-UK) Consortium Luke W                                                                                                                                                    |                                  |                                   |            |
| Meredith, M. Estee Torok , Myra Hosmillo, William L. Hamilton, Martin D. Curran, Theresa Feltwell, Anna Yakovleva, Charlotte J. Houldcroft, Aminu S. Jahun, Sarah L. Caddy, Ian Goodfellow                                                          |                                  |                                   |            |
| EPI_ISL_425466                                                                                                                                                                                                                                      | hCoV-19/England/NOTT-10DEEA/2020 | Europe / United Kingdom / England | 2020-03-11 |
| Queens Medical Centre, Clinical Microbiology Department / DeepSeq Nottingham COVID-19 Genomics UK (COG-UK) Consortium                                                                                                                               |                                  |                                   |            |
| Gemma Clark, Wendy Smith, Manjinder Khakh, Hannah Howson-Wells, Jonathan Ball, Patrick McClure, Joseph Chappell, Theocharis Tsoleridis, Nadine Holmes, Matthew Carlisle, Christopher Moore, Fei Sang, Johnny Debebe, Victoria Wright, Matthew Loose |                                  |                                   |            |
| EPI_ISL_425468                                                                                                                                                                                                                                      | hCoV-19/England/NOTT-10DF05/2020 | Europe / United Kingdom / England | 2020-03-12 |
| Queens Medical Centre, Clinical Microbiology Department / DeepSeq Nottingham COVID-19 Genomics UK (COG-UK) Consortium                                                                                                                               |                                  |                                   |            |
| Gemma Clark, Wendy Smith, Manjinder Khakh, Hannah Howson-Wells, Jonathan Ball, Patrick McClure, Joseph Chappell, Theocharis Tsoleridis, Nadine Holmes, Matthew Carlisle, Christopher Moore, Fei Sang, Johnny Debebe, Victoria Wright, Matthew Loose |                                  |                                   |            |
| EPI_ISL_425470                                                                                                                                                                                                                                      | hCoV-19/England/NOTT-10DF23/2020 | Europe / United Kingdom / England | 2020-03-12 |
| Queens Medical Centre, Clinical Microbiology Department / DeepSeq Nottingham COVID-19 Genomics UK (COG-UK) Consortium                                                                                                                               |                                  |                                   |            |
| Gemma Clark, Wendy Smith, Manjinder Khakh, Hannah Howson-Wells, Jonathan Ball, Patrick McClure, Joseph Chappell, Theocharis Tsoleridis, Nadine Holmes, Matthew Carlisle, Christopher Moore, Fei Sang, Johnny Debebe, Victoria Wright, Matthew Loose |                                  |                                   |            |
| EPI_ISL_425471                                                                                                                                                                                                                                      | hCoV-19/England/NOTT-10DF32/2020 | Europe / United Kingdom / England | 2020-03-13 |
| Queens Medical Centre, Clinical Microbiology Department / DeepSeq Nottingham COVID-19 Genomics UK (COG-UK) Consortium                                                                                                                               |                                  |                                   |            |
| Gemma Clark, Wendy Smith, Manjinder Khakh, Hannah Howson-Wells, Jonathan Ball, Patrick McClure, Joseph Chappell, Theocharis Tsoleridis, Nadine Holmes, Matthew Carlisle, Christopher Moore, Fei Sang, Johnny Debebe, Victoria Wright, Matthew Loose |                                  |                                   |            |
| EPI_ISL_425473                                                                                                                                                                                                                                      | hCoV-19/England/NOTT-10DF50/2020 | Europe / United Kingdom / England | 2020-03-14 |
| Queens Medical Centre, Clinical Microbiology Department / DeepSeq Nottingham COVID-19 Genomics UK (COG-UK) Consortium                                                                                                                               |                                  |                                   |            |
| Gemma Clark, Wendy Smith, Manjinder Khakh, Hannah Howson-Wells, Jonathan Ball, Patrick McClure, Joseph Chappell, Theocharis Tsoleridis, Nadine Holmes, Matthew Carlisle, Christopher Moore, Fei Sang, Johnny Debebe, Victoria Wright, Matthew Loose |                                  |                                   |            |
| EPI_ISL_425474                                                                                                                                                                                                                                      | hCoV-19/England/NOTT-10DF6F/2020 | Europe / United Kingdom / England | 2020-03-14 |
| Queens Medical Centre, Clinical Microbiology Department / DeepSeq Nottingham COVID-19 Genomics UK (COG-UK) Consortium                                                                                                                               |                                  |                                   |            |
| Gemma Clark, Wendy Smith, Manjinder Khakh, Hannah Howson-Wells, Jonathan Ball, Patrick McClure, Joseph Chappell, Theocharis Tsoleridis, Nadine Holmes, Matthew Carlisle, Christopher Moore, Fei Sang, Johnny Debebe, Victoria Wright, Matthew Loose |                                  |                                   |            |
| EPI_ISL_425475                                                                                                                                                                                                                                      | hCoV-19/England/NOTT-10DF7E/2020 | Europe / United Kingdom / England | 2020-03-14 |
| Queens Medical Centre, Clinical Microbiology Department / DeepSeq Nottingham COVID-19 Genomics UK (COG-UK) Consortium                                                                                                                               |                                  |                                   |            |
| Gemma Clark, Wendy Smith, Manjinder Khakh, Hannah Howson-Wells, Jonathan Ball, Patrick McClure, Joseph Chappell, Theocharis Tsoleridis, Nadine Holmes, Matthew Carlisle, Christopher Moore, Fei Sang, Johnny Debebe, Victoria Wright, Matthew Loose |                                  |                                   |            |
| EPI_ISL_425476                                                                                                                                                                                                                                      | hCoV-19/England/NOTT-10DF9C/2020 | Europe / United Kingdom / England | 2020-03-14 |
| Queens Medical Centre, Clinical Microbiology Department / DeepSeq Nottingham COVID-19 Genomics UK (COG-UK) Consortium                                                                                                                               |                                  |                                   |            |
| Gemma Clark, Wendy Smith, Manjinder Khakh, Hannah Howson-Wells, Jonathan Ball, Patrick McClure, Joseph Chappell, Theocharis Tsoleridis, Nadine Holmes, Matthew Carlisle, Christopher Moore, Fei Sang, Johnny Debebe, Victoria Wright, Matthew Loose |                                  |                                   |            |
| EPI_ISL_425477                                                                                                                                                                                                                                      | hCoV-19/England/NOTT-10DFAB/2020 | Europe / United Kingdom / England | 2020-03-14 |
| Queens Medical Centre, Clinical Microbiology Department / DeepSeq Nottingham COVID-19 Genomics UK (COG-UK) Consortium                                                                                                                               |                                  |                                   |            |
| Gemma Clark, Wendy Smith, Manjinder Khakh, Hannah Howson-Wells, Jonathan Ball, Patrick McClure, Joseph Chappell, Theocharis Tsoleridis, Nadine Holmes, Matthew Carlisle, Christopher Moore, Fei Sang, Johnny Debebe, Victoria Wright, Matthew Loose |                                  |                                   |            |
| EPI_ISL_425480                                                                                                                                                                                                                                      | hCoV-19/England/NOTT-10DFD8/2020 | Europe / United Kingdom / England | 2020-03-16 |



Queens Medical Centre, Clinical Microbiology Department / DeepSeq Nottingham COVID-19 Genomics UK (COG-UK)  
 Consortium Gemma Clark, Wendy Smith, Manjinder Khakh, Hannah Howson-Wells, Jonathan Ball, Patrick McClure,  
 Joseph Chappell, Theocharis Tsoleridis, Nadine Holmes, Matthew Carlisle, Christopher Moore, Fei Sang, Johnny  
 Debebe, Victoria Wright, Matthew Loose

EPI\_ISL\_425498 hCoV-19/England/NOTT-10E0F2/2020 Europe / United Kingdom / England 2020-03-19  
 Queens Medical Centre, Clinical Microbiology Department / DeepSeq Nottingham COVID-19 Genomics UK (COG-UK)  
 Consortium Gemma Clark, Wendy Smith, Manjinder Khakh, Hannah Howson-Wells, Jonathan Ball, Patrick McClure,  
 Joseph Chappell, Theocharis Tsoleridis, Nadine Holmes, Matthew Carlisle, Christopher Moore, Fei Sang, Johnny  
 Debebe, Victoria Wright, Matthew Loose

EPI\_ISL\_426630 hCoV-19/Taiwan/TSGH-02/2020 Asia / Taiwan / New Taipei city 2020-03-17 TSGH-CP  
 molecular lab TSGH-CP molecular lab Cherng-Lih Perng, Ming-Jr Jian, Chih-Kai Chang, Jung-Chung Lin, Kuo-  
 Ming Yeh, Chien-Wen Chen, Sheng-Kang Chiu, Hsing-Yi Chung, Shih-Hung Tsai, Kuo-Sheng Hung, Feng-Yee Chang,  
 Hung-Sheng Shang

EPI\_ISL\_426631 hCoV-19/Taiwan/TSGH-03/2020 Asia / Taiwan / New Taipei City 2020-03-17 TSGH-CP  
 molecular lab TSGH-CP molecular lab Cherng-Lih Perng, Ming-Jr Jian, Chih-Kai Chang, Jung-Chung Lin, Kuo-  
 Ming Yeh, Chien-Wen Chen, Sheng-Kang Chiu, Hsing-Yi Chung, Shih-Hung Tsai, Kuo-Sheng Hung, Tien-Yao Chang,  
 Feng-Yee Chang, Hung-Sheng Shang

EPI\_ISL\_426632 hCoV-19/Taiwan/TSGH-04/2020 Asia / Taiwan / New Taipei City 2020-03-17 TSGH-CP  
 molecular lab TSGH-CP molecular lab Cherng-Lih Perng, Ming-Jr Jian, Chih-Kai Chang, Jung-Chung Lin, Kuo-  
 Ming Yeh, Chien-Wen Chen, Sheng-Kang Chiu, Hsing-Yi Chung, Shih-Hung Tsai, Kuo-Sheng Hung, Tien-Yao Chang,  
 Feng-Yee Chang, Hung-Sheng Shang

EPI\_ISL\_426634 hCoV-19/Australia/NT08/2020 Oceania / Australia / Northern territory 2020-03-20  
 Royal Darwin Hospital Pathology Microbiological Diagnostic Unit Public Health Laboratory and Victorian  
 Infectious Diseases Reference Laboratory, Doherty Institute Meumann, E., Caly L., Seemann T., Sait, M.,  
 Schultz M., Druce J., Sherry, N.

EPI\_ISL\_426635 hCoV-19/Australia/NT18/2020 Oceania / Australia / Northern territory 2020-03-23  
 Royal Darwin Hospital Pathology Microbiological Diagnostic Unit Public Health Laboratory and Victorian  
 Infectious Diseases Reference Laboratory, Doherty Institute Meumann, E., Caly L., Seemann T., Sait, M.,  
 Schultz M., Druce J., Sherry, N.

EPI\_ISL\_426636 hCoV-19/Australia/NT19/2020 Oceania / Australia / Northern territory 2020-03-25  
 Royal Darwin Hospital Pathology Microbiological Diagnostic Unit Public Health Laboratory and Victorian  
 Infectious Diseases Reference Laboratory, Doherty Institute Meumann, E., Caly L., Seemann T., Sait, M.,  
 Schultz M., Druce J., Sherry, N.

EPI\_ISL\_426700 hCoV-19/Australia/VIC397/2020 Oceania / Australia / Victoria 2020-03-24 Victorian  
 Infectious Diseases Reference Laboratory (VIDRL) Microbiological Diagnostic Unit Public Health  
 Laboratory and Victorian Infectious Diseases Reference Laboratory, Doherty Institute Caly L., Seemann T.,  
 Sait, M., Schultz M., Druce J., Sherry, N.

EPI\_ISL\_426701 hCoV-19/Australia/VIC398/2020 Oceania / Australia / Victoria 2020-03-24 Victorian  
 Infectious Diseases Reference Laboratory (VIDRL) Microbiological Diagnostic Unit Public Health  
 Laboratory and Victorian Infectious Diseases Reference Laboratory, Doherty Institute Caly L., Seemann T.,  
 Sait, M., Schultz M., Druce J., Sherry, N.

EPI\_ISL\_426702 hCoV-19/Australia/VIC399/2020 Oceania / Australia / Victoria 2020-03-24 Victorian  
 Infectious Diseases Reference Laboratory (VIDRL) Microbiological Diagnostic Unit Public Health  
 Laboratory and Victorian Infectious Diseases Reference Laboratory, Doherty Institute Caly L., Seemann T.,  
 Sait, M., Schultz M., Druce J., Sherry, N.

EPI\_ISL\_426703 hCoV-19/Australia/VIC400/2020 Oceania / Australia / Victoria 2020-03-24 Victorian  
 Infectious Diseases Reference Laboratory (VIDRL) Microbiological Diagnostic Unit Public Health  
 Laboratory and Victorian Infectious Diseases Reference Laboratory, Doherty Institute Caly L., Seemann T.,  
 Sait, M., Schultz M., Druce J., Sherry, N.

EPI\_ISL\_426705 hCoV-19/Australia/VIC402/2020 Oceania / Australia / Victoria 2020-03-24 Victorian  
 Infectious Diseases Reference Laboratory (VIDRL) Microbiological Diagnostic Unit Public Health  
 Laboratory and Victorian Infectious Diseases Reference Laboratory, Doherty Institute Caly L., Seemann T.,  
 Sait, M., Schultz M., Druce J., Sherry, N.

EPI\_ISL\_426706 hCoV-19/Australia/VIC403/2020 Oceania / Australia / Victoria 2020-03-22 Victorian  
 Infectious Diseases Reference Laboratory (VIDRL) Microbiological Diagnostic Unit Public Health  
 Laboratory and Victorian Infectious Diseases Reference Laboratory, Doherty Institute Caly L., Seemann T.,  
 Sait, M., Schultz M., Druce J., Sherry, N.

EPI\_ISL\_426707 hCoV-19/Australia/VIC404/2020 Oceania / Australia / Victoria 2020-03-24 Victorian  
 Infectious Diseases Reference Laboratory (VIDRL) Microbiological Diagnostic Unit Public Health  
 Laboratory and Victorian Infectious Diseases Reference Laboratory, Doherty Institute Caly L., Seemann T.,  
 Sait, M., Schultz M., Druce J., Sherry, N.

EPI\_ISL\_426709 hCoV-19/Australia/VIC407/2020 Oceania / Australia / Victoria 2020-03-25 Victorian  
 Infectious Diseases Reference Laboratory (VIDRL) Microbiological Diagnostic Unit Public Health  
 Laboratory and Victorian Infectious Diseases Reference Laboratory, Doherty Institute Caly L., Seemann T.,  
 Sait, M., Schultz M., Druce J., Sherry, N.

EPI\_ISL\_426711 hCoV-19/Australia/VIC409/2020 Oceania / Australia / Victoria 2020-03-26 Victorian  
 Infectious Diseases Reference Laboratory (VIDRL) Microbiological Diagnostic Unit Public Health  
 Laboratory and Victorian Infectious Diseases Reference Laboratory, Doherty Institute Caly L., Seemann T.,  
 Sait, M., Schultz M., Druce J., Sherry, N.

EPI\_ISL\_426714 hCoV-19/Australia/VIC414/2020 Oceania / Australia / Victoria 2020-03-26 Victorian





|                                                                                      |                               |                                |            |                                                                                                                                                                                                                 |
|--------------------------------------------------------------------------------------|-------------------------------|--------------------------------|------------|-----------------------------------------------------------------------------------------------------------------------------------------------------------------------------------------------------------------|
| Infectious Diseases Reference Laboratory (VIDRL)                                     |                               |                                |            | Public Health                                                                                                                                                                                                   |
| Laboratory and Victorian Infectious Diseases Reference Laboratory, Doherty Institute |                               |                                |            | Caly L., Seemann T., Sait, M., Schultz M., Druce J., Sherry, N.                                                                                                                                                 |
| EPI_ISL_426774                                                                       | hCoV-19/Australia/VIC503/2020 | Oceania / Australia / Victoria | 2020-03-23 | Victorian Infectious Diseases Reference Laboratory (VIDRL)                                                                                                                                                      |
|                                                                                      |                               |                                |            | Microbiological Diagnostic Unit Public Health                                                                                                                                                                   |
| Laboratory and Victorian Infectious Diseases Reference Laboratory, Doherty Institute |                               |                                |            | Caly L., Seemann T., Sait, M., Schultz M., Druce J., Sherry, N.                                                                                                                                                 |
| EPI_ISL_426775                                                                       | hCoV-19/Australia/VIC504/2020 | Oceania / Australia / Victoria | 2020-03-23 | Victorian Infectious Diseases Reference Laboratory (VIDRL)                                                                                                                                                      |
|                                                                                      |                               |                                |            | Microbiological Diagnostic Unit Public Health                                                                                                                                                                   |
| Laboratory and Victorian Infectious Diseases Reference Laboratory, Doherty Institute |                               |                                |            | Caly L., Seemann T., Sait, M., Schultz M., Druce J., Sherry, N.                                                                                                                                                 |
| EPI_ISL_426777                                                                       | hCoV-19/Australia/VIC506/2020 | Oceania / Australia / Victoria | 2020-03-23 | Victorian Infectious Diseases Reference Laboratory (VIDRL)                                                                                                                                                      |
|                                                                                      |                               |                                |            | Microbiological Diagnostic Unit Public Health                                                                                                                                                                   |
| Laboratory and Victorian Infectious Diseases Reference Laboratory, Doherty Institute |                               |                                |            | Caly L., Seemann T., Sait, M., Schultz M., Druce J., Sherry, N.                                                                                                                                                 |
| EPI_ISL_426779                                                                       | hCoV-19/Australia/VIC509/2020 | Oceania / Australia / Victoria | 2020-03-22 | Victorian Infectious Diseases Reference Laboratory (VIDRL)                                                                                                                                                      |
|                                                                                      |                               |                                |            | Microbiological Diagnostic Unit Public Health                                                                                                                                                                   |
| Laboratory and Victorian Infectious Diseases Reference Laboratory, Doherty Institute |                               |                                |            | Caly L., Seemann T., Sait, M., Schultz M., Druce J., Sherry, N.                                                                                                                                                 |
| EPI_ISL_426781                                                                       | hCoV-19/Australia/VIC511/2020 | Oceania / Australia / Victoria | 2020-03-23 | Victorian Infectious Diseases Reference Laboratory (VIDRL)                                                                                                                                                      |
|                                                                                      |                               |                                |            | Microbiological Diagnostic Unit Public Health                                                                                                                                                                   |
| Laboratory and Victorian Infectious Diseases Reference Laboratory, Doherty Institute |                               |                                |            | Caly L., Seemann T., Sait, M., Schultz M., Druce J., Sherry, N.                                                                                                                                                 |
| EPI_ISL_426786                                                                       | hCoV-19/Australia/VIC516/2020 | Oceania / Australia / Victoria | 2020-03-23 | Victorian Infectious Diseases Reference Laboratory (VIDRL)                                                                                                                                                      |
|                                                                                      |                               |                                |            | Microbiological Diagnostic Unit Public Health                                                                                                                                                                   |
| Laboratory and Victorian Infectious Diseases Reference Laboratory, Doherty Institute |                               |                                |            | Caly L., Seemann T., Sait, M., Schultz M., Druce J., Sherry, N.                                                                                                                                                 |
| EPI_ISL_426788                                                                       | hCoV-19/Australia/VIC518/2020 | Oceania / Australia / Victoria | 2020-03-23 | Victorian Infectious Diseases Reference Laboratory (VIDRL)                                                                                                                                                      |
|                                                                                      |                               |                                |            | Microbiological Diagnostic Unit Public Health                                                                                                                                                                   |
| Laboratory and Victorian Infectious Diseases Reference Laboratory, Doherty Institute |                               |                                |            | Caly L., Seemann T., Sait, M., Schultz M., Druce J., Sherry, N.                                                                                                                                                 |
| EPI_ISL_426789                                                                       | hCoV-19/Australia/VIC520/2020 | Oceania / Australia / Victoria | 2020-03-23 | Victorian Infectious Diseases Reference Laboratory (VIDRL)                                                                                                                                                      |
|                                                                                      |                               |                                |            | Microbiological Diagnostic Unit Public Health                                                                                                                                                                   |
| Laboratory and Victorian Infectious Diseases Reference Laboratory, Doherty Institute |                               |                                |            | Caly L., Seemann T., Sait, M., Schultz M., Druce J., Sherry, N.                                                                                                                                                 |
| EPI_ISL_426790                                                                       | hCoV-19/Australia/VIC522/2020 | Oceania / Australia / Victoria | 2020-03-23 | Victorian Infectious Diseases Reference Laboratory (VIDRL)                                                                                                                                                      |
|                                                                                      |                               |                                |            | Microbiological Diagnostic Unit Public Health                                                                                                                                                                   |
| Laboratory and Victorian Infectious Diseases Reference Laboratory, Doherty Institute |                               |                                |            | Caly L., Seemann T., Sait, M., Schultz M., Druce J., Sherry, N.                                                                                                                                                 |
| EPI_ISL_426792                                                                       | hCoV-19/Australia/VIC525/2020 | Oceania / Australia / Victoria | 2020-03-24 | Victorian Infectious Diseases Reference Laboratory (VIDRL)                                                                                                                                                      |
|                                                                                      |                               |                                |            | Microbiological Diagnostic Unit Public Health                                                                                                                                                                   |
| Laboratory and Victorian Infectious Diseases Reference Laboratory, Doherty Institute |                               |                                |            | Caly L., Seemann T., Sait, M., Schultz M., Druce J., Sherry, N.                                                                                                                                                 |
| EPI_ISL_426793                                                                       | hCoV-19/Australia/VIC527/2020 | Oceania / Australia / Victoria | 2020-03-24 | Victorian Infectious Diseases Reference Laboratory (VIDRL)                                                                                                                                                      |
|                                                                                      |                               |                                |            | Microbiological Diagnostic Unit Public Health                                                                                                                                                                   |
| Laboratory and Victorian Infectious Diseases Reference Laboratory, Doherty Institute |                               |                                |            | Caly L., Seemann T., Sait, M., Schultz M., Druce J., Sherry, N.                                                                                                                                                 |
| EPI_ISL_426796                                                                       | hCoV-19/Australia/VIC530/2020 | Oceania / Australia / Victoria | 2020-03-23 | Victorian Infectious Diseases Reference Laboratory (VIDRL)                                                                                                                                                      |
|                                                                                      |                               |                                |            | Microbiological Diagnostic Unit Public Health                                                                                                                                                                   |
| Laboratory and Victorian Infectious Diseases Reference Laboratory, Doherty Institute |                               |                                |            | Caly L., Seemann T., Sait, M., Schultz M., Druce J., Sherry, N.                                                                                                                                                 |
| EPI_ISL_426797                                                                       | hCoV-19/Australia/VIC531/2020 | Oceania / Australia / Victoria | 2020-03-24 | Victorian Infectious Diseases Reference Laboratory (VIDRL)                                                                                                                                                      |
|                                                                                      |                               |                                |            | Microbiological Diagnostic Unit Public Health                                                                                                                                                                   |
| Laboratory and Victorian Infectious Diseases Reference Laboratory, Doherty Institute |                               |                                |            | Caly L., Seemann T., Sait, M., Schultz M., Druce J., Sherry, N.                                                                                                                                                 |
| EPI_ISL_426798                                                                       | hCoV-19/Australia/VIC532/2020 | Oceania / Australia / Victoria | 2020-03-23 | Victorian Infectious Diseases Reference Laboratory (VIDRL)                                                                                                                                                      |
|                                                                                      |                               |                                |            | Microbiological Diagnostic Unit Public Health                                                                                                                                                                   |
| Laboratory and Victorian Infectious Diseases Reference Laboratory, Doherty Institute |                               |                                |            | Caly L., Seemann T., Sait, M., Schultz M., Druce J., Sherry, N.                                                                                                                                                 |
| EPI_ISL_426799                                                                       | hCoV-19/Australia/VIC533/2020 | Oceania / Australia / Victoria | 2020-03-24 | Victorian Infectious Diseases Reference Laboratory (VIDRL)                                                                                                                                                      |
|                                                                                      |                               |                                |            | Microbiological Diagnostic Unit Public Health                                                                                                                                                                   |
| Laboratory and Victorian Infectious Diseases Reference Laboratory, Doherty Institute |                               |                                |            | Caly L., Seemann T., Sait, M., Schultz M., Druce J., Sherry, N.                                                                                                                                                 |
| EPI_ISL_428201                                                                       | hCoV-19/Sweden/RV-FOI-6/2020  | Europe / Sweden / Västerbotten | 2020-03-20 | Klinisk mikrobiologi, Region Västerbotten                                                                                                                                                                       |
|                                                                                      |                               |                                |            | Unit for Biological Agents, Department for CBRN Defence and Security, Swedish Defence Research Agency                                                                                                           |
|                                                                                      |                               |                                |            | FOI Bioinformatics team                                                                                                                                                                                         |
| EPI_ISL_428229                                                                       | hCoV-19/Taiwan/TSGH-12/2020   | Asia / Taiwan / Taipei         | 2020-03-18 | TSGH-CP molecular lab                                                                                                                                                                                           |
|                                                                                      |                               |                                |            | Cherng-Lih Perng, Ming-Jr Jian, Chih-Kai Chang, Jung-Chung Lin, Kuo-Ming Yeh, Chien-Wen Chen, Sheng-Kang Chiu, Hsing-Yi Chung, Shih-Hung Tsai, Kuo-Sheng Hung, Tien-Yao Chang, Feng-Yee Chang, Hung-Sheng Shang |









|                                                                                                                                                                                                                                                  |                                       |                                                  |            |
|--------------------------------------------------------------------------------------------------------------------------------------------------------------------------------------------------------------------------------------------------|---------------------------------------|--------------------------------------------------|------------|
| EPI_ISL_429029                                                                                                                                                                                                                                   | hCoV-19/USA/CA-CZB067/2020            | North America / USA / California / San Francisco | 2020-      |
| 03-28                                                                                                                                                                                                                                            | UCSF Clinical Microbiology Laboratory | Chan-Zuckerberg Biohub CZB Cliahub Consortium    |            |
| EPI_ISL_429030                                                                                                                                                                                                                                   | hCoV-19/USA/CA-CZB072/2020            | North America / USA / California / San Francisco | 2020-      |
| 03-28                                                                                                                                                                                                                                            | UCSF Clinical Microbiology Laboratory | Chan-Zuckerberg Biohub CZB Cliahub Consortium    |            |
| EPI_ISL_429031                                                                                                                                                                                                                                   | hCoV-19/USA/CA-CZB0139/2020           | North America / USA / California / San Francisco | 2020-      |
| 04-08                                                                                                                                                                                                                                            | UCSF Clinical Microbiology Laboratory | Chan-Zuckerberg Biohub CZB Cliahub Consortium    |            |
| EPI_ISL_429032                                                                                                                                                                                                                                   | hCoV-19/USA/CA-CZB082/2020            | North America / USA / California / San Francisco | 2020-      |
| 03-28                                                                                                                                                                                                                                            | UCSF Clinical Microbiology Laboratory | Chan-Zuckerberg Biohub CZB Cliahub Consortium    |            |
| EPI_ISL_429033                                                                                                                                                                                                                                   | hCoV-19/USA/CA-CZB086/2020            | North America / USA / California / San Francisco | 2020-      |
| 03-28                                                                                                                                                                                                                                            | UCSF Clinical Microbiology Laboratory | Chan-Zuckerberg Biohub CZB Cliahub Consortium    |            |
| EPI_ISL_429034                                                                                                                                                                                                                                   | hCoV-19/USA/CA-CZB0706/2020           | North America / USA / California / San Francisco | 2020-      |
| 03-23                                                                                                                                                                                                                                            | UCSF Clinical Microbiology Laboratory | Chan-Zuckerberg Biohub CZB Cliahub Consortium    |            |
| EPI_ISL_429035                                                                                                                                                                                                                                   | hCoV-19/USA/CA-CZB042/2020            | North America / USA / California / San Francisco | 2020-      |
| 03-25                                                                                                                                                                                                                                            | UCSF Clinical Microbiology Laboratory | Chan-Zuckerberg Biohub CZB Cliahub Consortium    |            |
| EPI_ISL_429036                                                                                                                                                                                                                                   | hCoV-19/USA/CA-CZB0107/2020           | North America / USA / California / San Francisco | 2020-      |
| 03-28                                                                                                                                                                                                                                            | UCSF Clinical Microbiology Laboratory | Chan-Zuckerberg Biohub CZB Cliahub Consortium    |            |
| EPI_ISL_429037                                                                                                                                                                                                                                   | hCoV-19/USA/CA-CZB09/2020             | North America / USA / California / San Francisco | 2020-      |
| 03-25                                                                                                                                                                                                                                            | UCSF Clinical Microbiology Laboratory | Chan-Zuckerberg Biohub CZB Cliahub Consortium    |            |
| EPI_ISL_429038                                                                                                                                                                                                                                   | hCoV-19/USA/CA-CZB0707/2020           | North America / USA / California / San Francisco | 2020-      |
| 03-23                                                                                                                                                                                                                                            | UCSF Clinical Microbiology Laboratory | Chan-Zuckerberg Biohub CZB Cliahub Consortium    |            |
| EPI_ISL_429039                                                                                                                                                                                                                                   | hCoV-19/USA/CA-CZB036/2020            | North America / USA / California / San Francisco | 2020-      |
| 03-25                                                                                                                                                                                                                                            | UCSF Clinical Microbiology Laboratory | Chan-Zuckerberg Biohub CZB Cliahub Consortium    |            |
| EPI_ISL_429040                                                                                                                                                                                                                                   | hCoV-19/USA/CA-CZB0701/2020           | North America / USA / California / San Francisco | 2020-      |
| 03-23                                                                                                                                                                                                                                            | UCSF Clinical Microbiology Laboratory | Chan-Zuckerberg Biohub CZB Cliahub Consortium    |            |
| EPI_ISL_429041                                                                                                                                                                                                                                   | hCoV-19/USA/CA-CZB096/2020            | North America / USA / California / San Francisco | 2020-      |
| 03-28                                                                                                                                                                                                                                            | UCSF Clinical Microbiology Laboratory | Chan-Zuckerberg Biohub CZB Cliahub Consortium    |            |
| EPI_ISL_429042                                                                                                                                                                                                                                   | hCoV-19/USA/CA-CZB0710/2020           | North America / USA / California / San Francisco | 2020-      |
| 03-23                                                                                                                                                                                                                                            | UCSF Clinical Microbiology Laboratory | Chan-Zuckerberg Biohub CZB Cliahub Consortium    |            |
| EPI_ISL_429043                                                                                                                                                                                                                                   | hCoV-19/USA/CA-CZB0156/2020           | North America / USA / California / San Francisco | 2020-      |
| 04-08                                                                                                                                                                                                                                            | UCSF Clinical Microbiology Laboratory | Chan-Zuckerberg Biohub CZB Cliahub Consortium    |            |
| EPI_ISL_429044                                                                                                                                                                                                                                   | hCoV-19/USA/CA-CZB0158/2020           | North America / USA / California / San Francisco | 2020-      |
| 04-08                                                                                                                                                                                                                                            | UCSF Clinical Microbiology Laboratory | Chan-Zuckerberg Biohub CZB Cliahub Consortium    |            |
| EPI_ISL_429045                                                                                                                                                                                                                                   | hCoV-19/USA/CA-CZB039/2020            | North America / USA / California / San Francisco | 2020-      |
| 03-25                                                                                                                                                                                                                                            | UCSF Clinical Microbiology Laboratory | Chan-Zuckerberg Biohub CZB Cliahub Consortium    |            |
| EPI_ISL_429046                                                                                                                                                                                                                                   | hCoV-19/USA/CA-CZB0125/2020           | North America / USA / California / San Francisco | 2020-      |
| 04-08                                                                                                                                                                                                                                            | UCSF Clinical Microbiology Laboratory | Chan-Zuckerberg Biohub CZB Cliahub Consortium    |            |
| EPI_ISL_429047                                                                                                                                                                                                                                   | hCoV-19/USA/CA-CZB0154/2020           | North America / USA / California / San Francisco | 2020-      |
| 04-08                                                                                                                                                                                                                                            | UCSF Clinical Microbiology Laboratory | Chan-Zuckerberg Biohub CZB Cliahub Consortium    |            |
| EPI_ISL_429048                                                                                                                                                                                                                                   | hCoV-19/USA/CA-CZB043/2020            | North America / USA / California / San Francisco | 2020-      |
| 03-25                                                                                                                                                                                                                                            | UCSF Clinical Microbiology Laboratory | Chan-Zuckerberg Biohub CZB Cliahub Consortium    |            |
| EPI_ISL_429049                                                                                                                                                                                                                                   | hCoV-19/USA/CA-CZB090/2020            | North America / USA / California / San Francisco | 2020-      |
| 03-28                                                                                                                                                                                                                                            | UCSF Clinical Microbiology Laboratory | Chan-Zuckerberg Biohub CZB Cliahub Consortium    |            |
| EPI_ISL_429050                                                                                                                                                                                                                                   | hCoV-19/USA/CA-CZB089/2020            | North America / USA / California / San Francisco | 2020-      |
| 03-28                                                                                                                                                                                                                                            | UCSF Clinical Microbiology Laboratory | Chan-Zuckerberg Biohub CZB Cliahub Consortium    |            |
| EPI_ISL_429051                                                                                                                                                                                                                                   | hCoV-19/USA/CA-CZB0741/2020           | North America / USA / California / San Francisco | 2020-      |
| 04-03                                                                                                                                                                                                                                            | UCSF Clinical Microbiology Laboratory | Chan-Zuckerberg Biohub CZB Cliahub Consortium    |            |
| EPI_ISL_429052                                                                                                                                                                                                                                   | hCoV-19/USA/CA-CZB0714/2020           | North America / USA / California / San Francisco | 2020-      |
| 03-23                                                                                                                                                                                                                                            | UCSF Clinical Microbiology Laboratory | Chan-Zuckerberg Biohub CZB Cliahub Consortium    |            |
| EPI_ISL_429053                                                                                                                                                                                                                                   | hCoV-19/USA/CA-CZB0167/2020           | North America / USA / California / San Francisco | 2020-      |
| 04-08                                                                                                                                                                                                                                            | UCSF Clinical Microbiology Laboratory | Chan-Zuckerberg Biohub CZB Cliahub Consortium    |            |
| EPI_ISL_429054                                                                                                                                                                                                                                   | hCoV-19/USA/CA-CZB0141/2020           | North America / USA / California / San Francisco | 2020-      |
| 04-08                                                                                                                                                                                                                                            | UCSF Clinical Microbiology Laboratory | Chan-Zuckerberg Biohub CZB Cliahub Consortium    |            |
| EPI_ISL_429055                                                                                                                                                                                                                                   | hCoV-19/USA/CA-CZB0726/2020           | North America / USA / California / San Francisco | 2020-      |
| 03-31                                                                                                                                                                                                                                            | UCSF Clinical Microbiology Laboratory | Chan-Zuckerberg Biohub CZB Cliahub Consortium    |            |
| EPI_ISL_429056                                                                                                                                                                                                                                   | hCoV-19/USA/CA-CZB0101/2020           | North America / USA / California / San Francisco | 2020-      |
| 03-28                                                                                                                                                                                                                                            | UCSF Clinical Microbiology Laboratory | Chan-Zuckerberg Biohub CZB Cliahub Consortium    |            |
| EPI_ISL_429057                                                                                                                                                                                                                                   | hCoV-19/USA/CA-CZB076/2020            | North America / USA / California / San Francisco | 2020-      |
| 03-28                                                                                                                                                                                                                                            | UCSF Clinical Microbiology Laboratory | Chan-Zuckerberg Biohub CZB Cliahub Consortium    |            |
| EPI_ISL_429058                                                                                                                                                                                                                                   | hCoV-19/USA/CA-CZB0114/2020           | North America / USA / California / San Francisco | 2020-      |
| 03-28                                                                                                                                                                                                                                            | UCSF Clinical Microbiology Laboratory | Chan-Zuckerberg Biohub CZB Cliahub Consortium    |            |
| EPI_ISL_429059                                                                                                                                                                                                                                   | hCoV-19/USA/CA-CZB0110/2020           | North America / USA / California / San Francisco | 2020-      |
| 03-28                                                                                                                                                                                                                                            | UCSF Clinical Microbiology Laboratory | Chan-Zuckerberg Biohub CZB Cliahub Consortium    |            |
| EPI_ISL_429508                                                                                                                                                                                                                                   | hCoV-19/Denmark/ALAB-SSI412A/2020     | Europe / Denmark / Unknown                       | 2020-03-23 |
| Department of Virus and Microbiological Special Diagnostics, Statens Serum Institut, Copenhagen, Denmark, Artillerivej 5, 2300 Copenahgen S Albertsen lab, Department of Chemistry and Bioscience, Aalborg University, Denmark Rasmus Kirkegaard |                                       |                                                  |            |
| EPI_ISL_429509                                                                                                                                                                                                                                   | hCoV-19/Denmark/ALAB-SSI413/2020      | Europe / Denmark / Unknown                       | 2020-03-10 |
| Department of Virus and Microbiological Special Diagnostics, Statens Serum Institut, Copenhagen, Denmark, Artillerivej 5, 2300 Copenahgen S Albertsen lab, Department of Chemistry and Bioscience, Aalborg University, Denmark Rasmus Kirkegaard |                                       |                                                  |            |







|                                                                                                                                             |                                                                                    |                   |                            |            |
|---------------------------------------------------------------------------------------------------------------------------------------------|------------------------------------------------------------------------------------|-------------------|----------------------------|------------|
| Artillerivej 5, 2300 Copenhagen S                                                                                                           | Albertsen lab, Department of Chemistry and Bioscience, Aalborg University, Denmark | Rasmus Kirkegaard |                            |            |
| EPI_ISL_429570                                                                                                                              | hCoV-19/Denmark/ALAB-SSI495/2020                                                   |                   | Europe / Denmark / Unknown | 2020-03-24 |
| Department of Virus and Microbiological Special Diagnostics, Statens Serum Institut, Copenhagen, Denmark, Artillerivej 5, 2300 Copenhagen S |                                                                                    |                   |                            |            |
| EPI_ISL_429571                                                                                                                              | hCoV-19/Denmark/ALAB-SSI497/2020                                                   |                   | Europe / Denmark / Unknown | 2020-03-26 |
| Department of Virus and Microbiological Special Diagnostics, Statens Serum Institut, Copenhagen, Denmark, Artillerivej 5, 2300 Copenhagen S |                                                                                    |                   |                            |            |
| EPI_ISL_429572                                                                                                                              | hCoV-19/Denmark/ALAB-SSI501/2020                                                   |                   | Europe / Denmark / Unknown | 2020-03-24 |
| Department of Virus and Microbiological Special Diagnostics, Statens Serum Institut, Copenhagen, Denmark, Artillerivej 5, 2300 Copenhagen S |                                                                                    |                   |                            |            |
| EPI_ISL_429573                                                                                                                              | hCoV-19/Denmark/ALAB-SSI502/2020                                                   |                   | Europe / Denmark / Unknown | 2020-03-23 |
| Department of Virus and Microbiological Special Diagnostics, Statens Serum Institut, Copenhagen, Denmark, Artillerivej 5, 2300 Copenhagen S |                                                                                    |                   |                            |            |
| EPI_ISL_429574                                                                                                                              | hCoV-19/Denmark/ALAB-SSI506/2020                                                   |                   | Europe / Denmark / Unknown | 2020-03-26 |
| Department of Virus and Microbiological Special Diagnostics, Statens Serum Institut, Copenhagen, Denmark, Artillerivej 5, 2300 Copenhagen S |                                                                                    |                   |                            |            |
| EPI_ISL_429575                                                                                                                              | hCoV-19/Denmark/ALAB-SSI507/2020                                                   |                   | Europe / Denmark / Unknown | 2020-03-25 |
| Department of Virus and Microbiological Special Diagnostics, Statens Serum Institut, Copenhagen, Denmark, Artillerivej 5, 2300 Copenhagen S |                                                                                    |                   |                            |            |
| EPI_ISL_429577                                                                                                                              | hCoV-19/Denmark/ALAB-SSI509/2020                                                   |                   | Europe / Denmark / Unknown | 2020-03-25 |
| Department of Virus and Microbiological Special Diagnostics, Statens Serum Institut, Copenhagen, Denmark, Artillerivej 5, 2300 Copenhagen S |                                                                                    |                   |                            |            |
| EPI_ISL_429578                                                                                                                              | hCoV-19/Denmark/ALAB-SSI510/2020                                                   |                   | Europe / Denmark / Unknown | 2020-03-25 |
| Department of Virus and Microbiological Special Diagnostics, Statens Serum Institut, Copenhagen, Denmark, Artillerivej 5, 2300 Copenhagen S |                                                                                    |                   |                            |            |
| EPI_ISL_429579                                                                                                                              | hCoV-19/Denmark/ALAB-SSI511/2020                                                   |                   | Europe / Denmark / Unknown | 2020-03-26 |
| Department of Virus and Microbiological Special Diagnostics, Statens Serum Institut, Copenhagen, Denmark, Artillerivej 5, 2300 Copenhagen S |                                                                                    |                   |                            |            |
| EPI_ISL_429580                                                                                                                              | hCoV-19/Denmark/ALAB-SSI512/2020                                                   |                   | Europe / Denmark / Unknown | 2020-03-25 |
| Department of Virus and Microbiological Special Diagnostics, Statens Serum Institut, Copenhagen, Denmark, Artillerivej 5, 2300 Copenhagen S |                                                                                    |                   |                            |            |
| EPI_ISL_429581                                                                                                                              | hCoV-19/Denmark/ALAB-SSI513/2020                                                   |                   | Europe / Denmark / Unknown | 2020-03-24 |
| Department of Virus and Microbiological Special Diagnostics, Statens Serum Institut, Copenhagen, Denmark, Artillerivej 5, 2300 Copenhagen S |                                                                                    |                   |                            |            |
| EPI_ISL_429582                                                                                                                              | hCoV-19/Denmark/ALAB-SSI514/2020                                                   |                   | Europe / Denmark / Unknown | 2020-03-16 |
| Department of Virus and Microbiological Special Diagnostics, Statens Serum Institut, Copenhagen, Denmark, Artillerivej 5, 2300 Copenhagen S |                                                                                    |                   |                            |            |
| EPI_ISL_429583                                                                                                                              | hCoV-19/Denmark/ALAB-SSI515/2020                                                   |                   | Europe / Denmark / Unknown | 2020-03-23 |
| Department of Virus and Microbiological Special Diagnostics, Statens Serum Institut, Copenhagen, Denmark, Artillerivej 5, 2300 Copenhagen S |                                                                                    |                   |                            |            |
| EPI_ISL_429584                                                                                                                              | hCoV-19/Denmark/ALAB-SSI518/2020                                                   |                   | Europe / Denmark / Unknown | 2020-03-26 |
| Department of Virus and Microbiological Special Diagnostics, Statens Serum Institut, Copenhagen, Denmark, Artillerivej 5, 2300 Copenhagen S |                                                                                    |                   |                            |            |
| EPI_ISL_429585                                                                                                                              | hCoV-19/Denmark/ALAB-SSI520/2020                                                   |                   | Europe / Denmark / Unknown | 2020-03-26 |
| Department of Virus and Microbiological Special Diagnostics, Statens Serum Institut, Copenhagen, Denmark, Artillerivej 5, 2300 Copenhagen S |                                                                                    |                   |                            |            |
| EPI_ISL_429586                                                                                                                              | hCoV-19/Denmark/ALAB-SSI521/2020                                                   |                   | Europe / Denmark / Unknown | 2020-03-26 |
| Department of Virus and Microbiological Special Diagnostics, Statens Serum Institut, Copenhagen, Denmark, Artillerivej 5, 2300 Copenhagen S |                                                                                    |                   |                            |            |
| EPI_ISL_429587                                                                                                                              | hCoV-19/Denmark/ALAB-SSI522/2020                                                   |                   | Europe / Denmark / Unknown | 2020-03-26 |
| Department of Virus and Microbiological Special Diagnostics, Statens Serum Institut, Copenhagen, Denmark, Artillerivej 5, 2300 Copenhagen S |                                                                                    |                   |                            |            |

|                                                                                                                                                                                                                                                  |                                  |                                              |            |                   |
|--------------------------------------------------------------------------------------------------------------------------------------------------------------------------------------------------------------------------------------------------|----------------------------------|----------------------------------------------|------------|-------------------|
| EPI_ISL_429588                                                                                                                                                                                                                                   | hCoV-19/Denmark/ALAB-SSI523/2020 | Europe / Denmark / Unknown                   | 2020-03-26 |                   |
| Department of Virus and Microbiological Special Diagnostics, Statens Serum Institut, Copenhagen, Denmark, Artillerivej 5, 2300 Copenhagen S Albertsen lab, Department of Chemistry and Bioscience, Aalborg University, Denmark Rasmus Kirkegaard |                                  |                                              |            |                   |
| EPI_ISL_429589                                                                                                                                                                                                                                   | hCoV-19/Denmark/ALAB-SSI592/2020 | Europe / Denmark / Unknown                   | 2020-03-28 |                   |
| Department of Virus and Microbiological Special Diagnostics, Statens Serum Institut, Copenhagen, Denmark, Artillerivej 5, 2300 Copenhagen S Albertsen lab, Department of Chemistry and Bioscience, Aalborg University, Denmark Rasmus Kirkegaard |                                  |                                              |            |                   |
| EPI_ISL_429590                                                                                                                                                                                                                                   | hCoV-19/Denmark/ALAB-SSI595/2020 | Europe / Denmark / Unknown                   | 2020-03-28 |                   |
| Department of Virus and Microbiological Special Diagnostics, Statens Serum Institut, Copenhagen, Denmark, Artillerivej 5, 2300 Copenhagen S Albertsen lab, Department of Chemistry and Bioscience, Aalborg University, Denmark Rasmus Kirkegaard |                                  |                                              |            |                   |
| EPI_ISL_429598                                                                                                                                                                                                                                   | hCoV-19/USA/WA-UW-4546/2020      | North America / USA / Washington             | 2020-03-31 | UW                |
| Virology Lab UW Virology Lab Pavitra Roychoudhury, Hong Xie, Keith Jerome, Alexander Greninger                                                                                                                                                   |                                  |                                              |            |                   |
| EPI_ISL_430000                                                                                                                                                                                                                                   | hCoV-19/Jordan/SR-042/2020       | Asia / Jordan / Amman                        | 2020-03-30 | Biolab Diagnostic |
| Laboratories Andersen lab at Scripps Research Issa Abu-Dayyeh, Ahmad Tibi, Lama Hussein, Lina Mohammad, Zein Naber, Amid Abdelnour with SEARCH Alliance San Diego                                                                                |                                  |                                              |            |                   |
| EPI_ISL_430001                                                                                                                                                                                                                                   | hCoV-19/Jordan/SR-043/2020       | Asia / Jordan / Amman                        | 2020-03-17 | Biolab Diagnostic |
| Laboratories Andersen lab at Scripps Research Issa Abu-Dayyeh, Ahmad Tibi, Lama Hussein, Lina Mohammad, Zein Naber, Amid Abdelnour with SEARCH Alliance San Diego                                                                                |                                  |                                              |            |                   |
| EPI_ISL_430002                                                                                                                                                                                                                                   | hCoV-19/Jordan/SR-044/2020       | Asia / Jordan / Amman                        | 2020-03-16 | Biolab Diagnostic |
| Laboratories Andersen lab at Scripps Research Issa Abu-Dayyeh, Ahmad Tibi, Lama Hussein, Lina Mohammad, Zein Naber, Amid Abdelnour with SEARCH Alliance San Diego                                                                                |                                  |                                              |            |                   |
| EPI_ISL_430003                                                                                                                                                                                                                                   | hCoV-19/Jordan/SR-045/2020       | Asia / Jordan / Amman                        | 2020-03-16 | Biolab Diagnostic |
| Laboratories Andersen lab at Scripps Research Issa Abu-Dayyeh, Ahmad Tibi, Lama Hussein, Lina Mohammad, Zein Naber, Amid Abdelnour with SEARCH Alliance San Diego                                                                                |                                  |                                              |            |                   |
| EPI_ISL_430004                                                                                                                                                                                                                                   | hCoV-19/Jordan/SR-046/2020       | Asia / Jordan / Amman                        | 2020-03-17 | Biolab Diagnostic |
| Laboratories Andersen lab at Scripps Research Issa Abu-Dayyeh, Ahmad Tibi, Lama Hussein, Lina Mohammad, Zein Naber, Amid Abdelnour with SEARCH Alliance San Diego                                                                                |                                  |                                              |            |                   |
| EPI_ISL_430006                                                                                                                                                                                                                                   | hCoV-19/Jordan/SR-048/2020       | Asia / Jordan / Amman                        | 2020-03-23 | Biolab Diagnostic |
| Laboratories Andersen lab at Scripps Research Issa Abu-Dayyeh, Ahmad Tibi, Lama Hussein, Lina Mohammad, Zein Naber, Amid Abdelnour with SEARCH Alliance San Diego                                                                                |                                  |                                              |            |                   |
| EPI_ISL_430007                                                                                                                                                                                                                                   | hCoV-19/Jordan/SR-049/2020       | Asia / Jordan / Amman                        | 2020-03-19 | Biolab Diagnostic |
| Laboratories Andersen lab at Scripps Research Issa Abu-Dayyeh, Ahmad Tibi, Lama Hussein, Lina Mohammad, Zein Naber, Amid Abdelnour with SEARCH Alliance San Diego                                                                                |                                  |                                              |            |                   |
| EPI_ISL_430009                                                                                                                                                                                                                                   | hCoV-19/Jordan/SR-052/2020       | Asia / Jordan / Irbid                        | 2020-03-30 | Biolab Diagnostic |
| Laboratories Andersen lab at Scripps Research Issa Abu-Dayyeh, Ahmad Tibi, Lama Hussein, Lina Mohammad, Zein Naber, Amid Abdelnour with SEARCH Alliance San Diego                                                                                |                                  |                                              |            |                   |
| EPI_ISL_430011                                                                                                                                                                                                                                   | hCoV-19/Jordan/SR-053/2020       | Asia / Jordan / Amman                        | 2020-03-19 | Biolab Diagnostic |
| Laboratories Andersen lab at Scripps Research Issa Abu-Dayyeh, Ahmad Tibi, Lama Hussein, Lina Mohammad, Zein Naber, Amid Abdelnour with SEARCH Alliance San Diego                                                                                |                                  |                                              |            |                   |
| EPI_ISL_430012                                                                                                                                                                                                                                   | hCoV-19/Jordan/SR-054/2020       | Asia / Jordan / Irbid                        | 2020-03-30 | Biolab Diagnostic |
| Laboratories Andersen lab at Scripps Research Issa Abu-Dayyeh, Ahmad Tibi, Lama Hussein, Lina Mohammad, Zein Naber, Amid Abdelnour with SEARCH Alliance San Diego                                                                                |                                  |                                              |            |                   |
| EPI_ISL_430014                                                                                                                                                                                                                                   | hCoV-19/Jordan/SR-056/2020       | Asia / Jordan / Amman                        | 2020-03-17 | Biolab Diagnostic |
| Laboratories Andersen lab at Scripps Research Issa Abu-Dayyeh, Ahmad Tibi, Lama Hussein, Lina Mohammad, Zein Naber, Amid Abdelnour with SEARCH Alliance San Diego                                                                                |                                  |                                              |            |                   |
| EPI_ISL_430015                                                                                                                                                                                                                                   | hCoV-19/Jordan/SR-057/2020       | Asia / Jordan / Amman                        | 2020-03-24 | Biolab Diagnostic |
| Laboratories Andersen lab at Scripps Research Issa Abu-Dayyeh, Ahmad Tibi, Lama Hussein, Lina Mohammad, Zein Naber, Amid Abdelnour with SEARCH Alliance San Diego                                                                                |                                  |                                              |            |                   |
| EPI_ISL_430016                                                                                                                                                                                                                                   | hCoV-19/USA/CA-SR016/2020        | North America / USA / California / San Diego | 2020-03-24 |                   |
| Andersen lab at Scripps Research Andersen lab at Scripps Research SEARCH Alliance San Diego                                                                                                                                                      |                                  |                                              |            |                   |
| EPI_ISL_430039                                                                                                                                                                                                                                   | hCoV-19/USA/UT-0370/2020         | North America / USA / Utah                   | 2020-03-30 | Utah Public       |
| Health Laboratory Utah Public Health Laboratory Erin Young, Kelly Oakeson                                                                                                                                                                        |                                  |                                              |            |                   |
| EPI_ISL_430041                                                                                                                                                                                                                                   | hCoV-19/USA/UT-0443/2020         | North America / USA / Utah                   | 2020-03-30 | Utah Public       |
| Health Laboratory Utah Public Health Laboratory Erin Young, Kelly Oakeson                                                                                                                                                                        |                                  |                                              |            |                   |
| EPI_ISL_430043                                                                                                                                                                                                                                   | hCoV-19/USA/UT-0445/2020         | North America / USA / Utah                   | 2020-03-30 | Utah Public       |
| Health Laboratory Utah Public Health Laboratory Erin Young, Kelly Oakeson                                                                                                                                                                        |                                  |                                              |            |                   |
| EPI_ISL_430044                                                                                                                                                                                                                                   | hCoV-19/USA/UT-0446/2020         | North America / USA / Utah                   | 2020-03-30 | Utah Public       |
| Health Laboratory Utah Public Health Laboratory Erin Young, Kelly Oakeson                                                                                                                                                                        |                                  |                                              |            |                   |
| EPI_ISL_430045                                                                                                                                                                                                                                   | hCoV-19/USA/UT-0447/2020         | North America / USA / Utah                   | 2020-03-31 | Utah Public       |
| Health Laboratory Utah Public Health Laboratory Erin Young, Kelly Oakeson                                                                                                                                                                        |                                  |                                              |            |                   |
| EPI_ISL_430047                                                                                                                                                                                                                                   | hCoV-19/USA/UT-0492/2020         | North America / USA / Utah                   | 2020-04-02 | Utah Public       |
| Health Laboratory Utah Public Health Laboratory Erin Young, Kelly Oakeson                                                                                                                                                                        |                                  |                                              |            |                   |
| EPI_ISL_430050                                                                                                                                                                                                                                   | hCoV-19/USA/UT-0500/2020         | North America / USA / Utah                   | 2020-03-31 | Utah Public       |
| Health Laboratory Utah Public Health Laboratory Erin Young, Kelly Oakeson                                                                                                                                                                        |                                  |                                              |            |                   |
| EPI_ISL_430051                                                                                                                                                                                                                                   | hCoV-19/USA/UT-0501/2020         | North America / USA / Utah                   | 2020-04-02 | Utah Public       |
| Health Laboratory Utah Public Health Laboratory Erin Young, Kelly Oakeson                                                                                                                                                                        |                                  |                                              |            |                   |
| EPI_ISL_430053                                                                                                                                                                                                                                   | hCoV-19/USA/UT-0503/2020         | North America / USA / Utah                   | 2020-04-02 | Utah Public       |
| Health Laboratory Utah Public Health Laboratory Erin Young, Kelly Oakeson                                                                                                                                                                        |                                  |                                              |            |                   |

|                |                                |                                |            |                                                            |
|----------------|--------------------------------|--------------------------------|------------|------------------------------------------------------------|
| EPI_ISL_430055 | hCoV-19/USA/UT-0507/2020       | North America / USA / Utah     | 2020-04-02 | Utah Public Health Laboratory                              |
| EPI_ISL_430057 | hCoV-19/USA/UT-0510/2020       | North America / USA / Utah     | 2020-04-03 | Utah Public Health Laboratory                              |
| EPI_ISL_430500 | hCoV-19/Australia/VIC1210/2020 | Oceania / Australia / Victoria | 2020-04-01 | Victorian Infectious Diseases Reference Laboratory (VIDRL) |
| EPI_ISL_430512 | hCoV-19/Australia/VIC1235/2020 | Oceania / Australia / Victoria | 2020-04-02 | Victorian Infectious Diseases Reference Laboratory (VIDRL) |
| EPI_ISL_430519 | hCoV-19/Australia/VIC1222/2020 | Oceania / Australia / Victoria | 2020-04-01 | Victorian Infectious Diseases Reference Laboratory (VIDRL) |
| EPI_ISL_430522 | hCoV-19/Australia/VIC1224/2020 | Oceania / Australia / Victoria | 2020-04-01 | Victorian Infectious Diseases Reference Laboratory (VIDRL) |
| EPI_ISL_430528 | hCoV-19/Australia/VIC1192/2020 | Oceania / Australia / Victoria | 2020-03-30 | Victorian Infectious Diseases Reference Laboratory (VIDRL) |
| EPI_ISL_430532 | hCoV-19/Australia/VIC1025/2020 | Oceania / Australia / Victoria | 2020-04-02 | Victorian Infectious Diseases Reference Laboratory (VIDRL) |
| EPI_ISL_430533 | hCoV-19/Australia/VIC1037/2020 | Oceania / Australia / Victoria | 2020-04-03 | Victorian Infectious Diseases Reference Laboratory (VIDRL) |
| EPI_ISL_430535 | hCoV-19/Australia/VIC1039/2020 | Oceania / Australia / Victoria | 2020-04-03 | Victorian Infectious Diseases Reference Laboratory (VIDRL) |
| EPI_ISL_430536 | hCoV-19/Australia/VIC1041/2020 | Oceania / Australia / Victoria | 2020-04-03 | Victorian Infectious Diseases Reference Laboratory (VIDRL) |
| EPI_ISL_430538 | hCoV-19/Australia/VIC1042/2020 | Oceania / Australia / Victoria | 2020-04-03 | Victorian Infectious Diseases Reference Laboratory (VIDRL) |
| EPI_ISL_430539 | hCoV-19/Australia/VIC1043/2020 | Oceania / Australia / Victoria | 2020-04-03 | Victorian Infectious Diseases Reference Laboratory (VIDRL) |
| EPI_ISL_430542 | hCoV-19/Australia/VIC978/2020  | Oceania / Australia / Victoria | 2020-03-29 | Victorian Infectious Diseases Reference Laboratory (VIDRL) |
| EPI_ISL_430543 | hCoV-19/Australia/VIC982/2020  | Oceania / Australia / Victoria | 2020-03-30 | Victorian Infectious Diseases Reference Laboratory (VIDRL) |
| EPI_ISL_430545 | hCoV-19/Australia/VIC983/2020  | Oceania / Australia / Victoria | 2020-03-30 | Victorian Infectious Diseases Reference Laboratory (VIDRL) |
| EPI_ISL_430547 | hCoV-19/Australia/VIC1011/2020 | Oceania / Australia / Victoria | 2020-04-01 | Victorian Infectious Diseases Reference Laboratory (VIDRL) |
| EPI_ISL_430550 | hCoV-19/Australia/VIC1046/2020 | Oceania / Australia / Victoria | 2020-04-03 | Victorian Infectious Diseases Reference Laboratory (VIDRL) |
| EPI_ISL_430551 | hCoV-19/Australia/VIC989/2020  | Oceania / Australia / Victoria | 2020-03-31 | Victorian Infectious Diseases Reference Laboratory (VIDRL) |





|                |                                   |                                           |            |                                                                                                                                     |                                                                                                                                                                         |                                                                                                                                                                                                                                                                                             |
|----------------|-----------------------------------|-------------------------------------------|------------|-------------------------------------------------------------------------------------------------------------------------------------|-------------------------------------------------------------------------------------------------------------------------------------------------------------------------|---------------------------------------------------------------------------------------------------------------------------------------------------------------------------------------------------------------------------------------------------------------------------------------------|
| EPI_ISL_430596 | hCoV-19/Australia/VIC1133/2020    | Oceania / Australia / Victoria            | 2020-04-08 | Victorian Infectious Diseases Reference Laboratory (VIDRL)                                                                          | Microbiological Diagnostic Unit Public Health Laboratory and Victorian Infectious Diseases Reference Laboratory, The Peter Doherty Institute for Infection and Immunity | Caly L., Seemann T., Sait, M., Schultz M., Druce J., Sherry, N.                                                                                                                                                                                                                             |
| EPI_ISL_430597 | hCoV-19/Australia/VIC1086/2020    | Oceania / Australia / Victoria            | 2020-04-06 | Victorian Infectious Diseases Reference Laboratory (VIDRL)                                                                          | Microbiological Diagnostic Unit Public Health Laboratory and Victorian Infectious Diseases Reference Laboratory, The Peter Doherty Institute for Infection and Immunity | Caly L., Seemann T., Sait, M., Schultz M., Druce J., Sherry, N.                                                                                                                                                                                                                             |
| EPI_ISL_430598 | hCoV-19/Australia/VIC1157/2020    | Oceania / Australia / Victoria            | 2020-04-09 | Victorian Infectious Diseases Reference Laboratory (VIDRL)                                                                          | Microbiological Diagnostic Unit Public Health Laboratory and Victorian Infectious Diseases Reference Laboratory, The Peter Doherty Institute for Infection and Immunity | Caly L., Seemann T., Sait, M., Schultz M., Druce J., Sherry, N.                                                                                                                                                                                                                             |
| EPI_ISL_450404 | hCoV-19/Hong Kong/VM20009579/2020 | Asia / Hong Kong                          | 2020-03-16 | unknown School of Public Health                                                                                                     | Sit,T.H.S., Brackman,C.J., Sims,L.D., Tsang,D.N.C., Chu,D.K.W., Perera,R.A.P.M., Poon,L.L.M. and Peiris,M.                                                              |                                                                                                                                                                                                                                                                                             |
| EPI_ISL_450444 | hCoV-19/Beijing/IME-HZ01/2020     | Asia / China / Beijing                    | 2020-01-22 | unknown Dept. OPA                                                                                                                   | Zhang,X.A., Fan,H., Qi,R.Z., Zheng,W., Zheng,K., Gong,J.H., Fang,L.Q. and Liu,W.                                                                                        |                                                                                                                                                                                                                                                                                             |
| EPI_ISL_450489 | hCoV-19/Wuhan/YB012504/2020       | Asia / China / Wuhan / Hubei              | 2020-01-25 | unknown CAS Key Laboratory of Special Pathogens and Biosafety and Center for Emerging Infectious Diseases                           | Lin,H., Xie,S., Shi,Z. and Zhou,P.                                                                                                                                      |                                                                                                                                                                                                                                                                                             |
| EPI_ISL_406862 | hCoV-19/Germany/BavPat1/2020      | Europe / Germany / Bavaria / Munich       | 2020-01-28 | Charité Universitätsmedizin Berlin, Institute of Virology; Institut für Mikrobiologie der Bundeswehr, Munich                        | Charité Universitätsmedizin Berlin, Institute of Virology                                                                                                               | Victor M Corman, Julia Schneider, Talitha Veith, Barbara Mühlemann, Markus Antwerpen, Christian Drosten, Roman Wölfel                                                                                                                                                                       |
| EPI_ISL_406970 | hCoV-19/Hangzhou/HZ-1/2020        | Asia / China / Zhejiang / Hangzhou        | 2020-01-20 | Hangzhou Center for Disease and Control Microbiology Lab                                                                            | Hangzhou Center for Disease and Control Microbiology Lab                                                                                                                | Yu Hua, Wang Haoqiu, Li Jun, Yu Xinfeng                                                                                                                                                                                                                                                     |
| EPI_ISL_406973 | hCoV-19/Singapore/1/2020          | Asia / Singapore                          | 2020-01-23 | Singapore General Hospital                                                                                                          | National Public Health Laboratory                                                                                                                                       | Mak, TM; Octavia S; Chavatte JM; Zhou, ZY; Cui, L; Lin, RTP                                                                                                                                                                                                                                 |
| EPI_ISL_409067 | hCoV-19/USA/MA1/2020              | North America / USA / Massachusetts       | 2020-01-29 | Massachusetts Department of Public Health                                                                                           | Pathogen Discovery, Respiratory Viruses Branch, Division of Viral Diseases, Centers for Diseases Control and Prevention                                                 | Clinton R. Paden, Jing Zhang, Krista Queen, Yan Li, Ying Tao, Anna Uehara, Xiaoyan Lu, Brian Lynch, Senthil Kumar K. Sakthivel, Brett L. Whitaker, Shifaa Kamili, Lijuan Wang, Janna' R. Murray, Susan I. Gerber, Stephen Lindstrom, Suxiang Tong                                           |
| EPI_ISL_410044 | hCoV-19/USA/CA6/2020              | North America / USA / California          | 2020-01-27 | California Department of Public Health                                                                                              | Pathogen Discovery, Respiratory Viruses Branch, Division of Viral Diseases, Centers for Diseases Control and Prevention                                                 | Jing Zhang, Krista Queen, Yan Li, Ying Tao, Anna Uehara, Clinton R. Paden, Xiaoyan Lu, Brian Lynch, Senthil Kumar K. Sakthivel, Brett L. Whitaker, Shifaa Kamili, Lijuan Wang, Janna' R. Murray, Susan I. Gerber, Stephen Lindstrom, Suxiang Tong                                           |
| EPI_ISL_410045 | hCoV-19/USA/IL2/2020              | North America / USA / Illinois            | 2020-01-28 | IL Department of Public Health                                                                                                      | Chicago Laboratory Pathogen Discovery, Respiratory Viruses Branch, Division of Viral Diseases, Centers for Diseases Control and Prevention                              | Yan Li, Jing Zhang, Krista Queen, Ying Tao, Anna Uehara, Clinton R. Paden, Xiaoyan Lu, Brian Lynch, Senthil Kumar K. Sakthivel, Brett L. Whitaker, Shifaa Kamili, Lijuan Wang, Janna' R. Murray, Susan I. Gerber, Stephen Lindstrom, Suxiang Tong                                           |
| EPI_ISL_412862 | hCoV-19/USA/CA9/2020              | North America / USA / California / Solano | 2020-02-23 | California Department of Public Health                                                                                              | Pathogen Discovery, Respiratory Viruses Branch, Division of Viral Diseases, Centers for Disease Control and Prevention                                                  | Krista Queen, Anna Uehara, Jing Zhang, Yan Li, Ying Tao, Clinton R. Paden, Haibin Wang, Shifaa Kamili, Xiaoyan Lu, Brian Lynch, Senthil Kumar K. Sakthivel, Brett L. Whitaker, Lijuan Wang, Janna' R. Murray, Jasmine Padilla, Justin Lee, Susan I. Gerber, Stephen Lindstrom, Suxiang Tong |
| EPI_ISL_412869 | hCoV-19/South Korea/KCDC05/2020   | Asia / South Korea / Seoul                | 2020-01-30 | Division of Viral Diseases, Center for Laboratory Control of Infectious Diseases, Korea Centers for Diseases Control and Prevention | Division of Viral Diseases, Center for Laboratory Control of Infectious Diseases, Korea Centers for Diseases Control and Prevention                                     | Jeong-Min Kim, Yoon-Seok Chung, Namjoo Lee, Mi-Seon Kim, Sang Hee Woo, Hye-Jun Jo, Sehee Park, Heui Man Kim, Myung Guk Han                                                                                                                                                                  |
| EPI_ISL_412870 | hCoV-19/South Korea/KCDC06/2020   | Asia / South Korea / Seoul                | 2020-01-30 | Division of Viral Diseases, Center for Laboratory Control of Infectious Diseases, Korea Centers for Diseases Control and Prevention | Division of Viral Diseases, Center for Laboratory Control of Infectious Diseases, Korea Centers for Diseases Control and Prevention                                     | Jeong-Min Kim, Yoon-Seok Chung, Namjoo Lee, Mi-Seon Kim, Sang Hee Woo, Hye-Jun Jo, Sehee Park, Heui Man Kim, Myung Guk Han                                                                                                                                                                  |
| EPI_ISL_412871 | hCoV-19/South Korea/KCDC07/2020   | Asia / South Korea / Seoul                | 2020-01-31 | Division of Viral Diseases, Center for Laboratory Control of Infectious Diseases, Korea Centers for Diseases Control and Prevention | Division of Viral Diseases, Center for Laboratory Control of Infectious Diseases, Korea Centers for Diseases Control and Prevention                                     | Jeong-Min Kim, Yoon-Seok Chung, Namjoo Lee, Mi-Seon Kim, Sang Hee Woo, Hye-Jun Jo, Sehee Park, Heui Man Kim, Myung Guk Han                                                                                                                                                                  |
| EPI_ISL_412872 | hCoV-19/South Korea/KCDC12/2020   | Asia / South Korea / Gyeonggi-do          | 2020-02-01 | Division of Viral Diseases, Center for Laboratory Control of Infectious Diseases, Korea Centers for Diseases Control and Prevention | Division of Viral Diseases, Center for Laboratory Control of Infectious Diseases, Korea Centers for Diseases Control and Prevention                                     | Jeong-Min Kim, Yoon-Seok Chung, Namjoo Lee, Mi-Seon Kim, Sang                                                                                                                                                                                                                               |

Hee Woo, Hye-Jun Jo, Sehee Park, Heui Man Kim, Myung Guk Han  
EPI\_ISL\_412873 hCoV-19/South Korea/KCDC24/2020 Asia / South Korea / Chungcheongnam-do 2020-02-06  
Division of Viral Diseases, Center for Laboratory Control of Infectious Diseases, Korea Centers for Diseases  
Control and Prevention Division of Viral Diseases, Center for Laboratory Control of Infectious Diseases, Korea  
Centers for Diseases Control and Prevention Jeong-Min Kim, Yoon-Seok Chung, Namjoo Lee, Mi-Seon Kim, Sang  
Hee Woo, Hye-Jun Jo, Sehee Park, Heui Man Kim, Myung Guk Han

EPI\_ISL\_413996 hCoV-19/Switzerland/TI9486/2020 Europe / Switzerland / Tessin 2020-02-24 Laboratoire de  
Virologie, HUG Swiss National Reference Centre for Influenza LAUBSCHER Florian et al.  
EPI\_ISL\_413997 hCoV-19/Switzerland/GE3895/2020 Europe / Switzerland / Geneva 2020-02-26 Laboratoire de  
Virologie, HUG Swiss National Reference Centre for Influenza LAUBSCHER Florian et al.  
EPI\_ISL\_413999 hCoV-19/Switzerland/AG0361/2020 Europe / Switzerland / Argovie 2020-02-27 Laboratoire de  
Virologie, HUG Swiss National Reference Centre for Influenza LAUBSCHER Florian et al.  
EPI\_ISL\_415041 hCoV-19/Wales/PHW04/2020 Europe / United Kingdom / Wales 2020-03-07 Wales  
Specialist Virology Centre Public Health Wales Microbiology Cardiff Catherine Moore, Joanne  
Watkins, Sally Corden, Tom Connor

EPI\_ISL\_416042 hCoV-19/Hangzhou/ZJU-02/2020 Asia / China / Hangzhou 2020-01-26 State Key Laboratory  
for Diagnosis and Treatment of Infectious Diseases, National Clinical Research Center for Infectious Diseases,  
First Affiliated Hospital, Zhejiang University School of Medicine, Hangzhou, China. 310003 State Key  
Laboratory for Diagnosis and Treatment of Infectious Diseases, National Clinical Research Center for Infectious  
Diseases, First Affiliated Hospital, Zhejiang University School of Medicine, Hangzhou, China. 310003  
Hangping Yao, Nanping Wu, Chao Jiang, Xiangyun Lu, Linfang Cheng, Fumin Liu, Zhigang Wu, Haibo Wu, Changzhong  
Jin, Min Zheng, Lanjuan Li

EPI\_ISL\_416044 hCoV-19/Hangzhou/ZJU-03/2020 Asia / China / Hangzhou 2020-01-25 State Key Laboratory  
for Diagnosis and Treatment of Infectious Diseases, National Clinical Research Center for Infectious Diseases,  
First Affiliated Hospital, Zhejiang University School of Medicine, Hangzhou, China 310003 State Key  
Laboratory for Diagnosis and Treatment of Infectious Diseases, National Clinical Research Center for Infectious  
Diseases, First Affiliated Hospital, Zhejiang University School of Medicine, Hangzhou, China 310003  
Hangping Yao, Nanping Wu, Chao Jiang, Xiangyun Lu, Linfang Cheng, Fumin Liu, Zhigang Wu, Haibo Wu, Changzhong  
Jin, Min Zheng, Lanjuan Li

EPI\_ISL\_416046 hCoV-19/Hangzhou/ZJU-04/2020 Asia / China / Hangzhou 2020-01-24 State Key Laboratory  
for Diagnosis and Treatment of Infectious Diseases, National Clinical Research Center for Infectious Diseases,  
First Affiliated Hospital, Zhejiang University School of Medicine, Hangzhou, China 310003 State Key  
Laboratory for Diagnosis and Treatment of Infectious Diseases, National Clinical Research Center for Infectious  
Diseases, First Affiliated Hospital, Zhejiang University School of Medicine, Hangzhou, China 310003  
Hangping Yao, Nanping Wu, Chao Jiang, Xiangyun Lu, Linfang Cheng, Fumin Liu, Zhigang Wu, Haibo Wu, Changzhong  
Jin, Min Zheng, Lanjuan Li

EPI\_ISL\_416047 hCoV-19/Hangzhou/ZJU-06/2020 Asia / China / Hangzhou 2020-02-02 State Key Laboratory  
for Diagnosis and Treatment of Infectious Diseases, National Clinical Research Center for Infectious Diseases,  
First Affiliated Hospital, Zhejiang University School of Medicine, Hangzhou, China 310003 State Key  
Laboratory for Diagnosis and Treatment of Infectious Diseases, National Clinical Research Center for Infectious  
Diseases, First Affiliated Hospital, Zhejiang University School of Medicine, Hangzhou, China 310003  
Hangping Yao, Nanping Wu, Chao Jiang, Xiangyun Lu, Linfang Cheng, Fumin Liu, Zhigang Wu, Haibo Wu, Changzhong  
Jin, Min Zheng, Lanjuan Li

EPI\_ISL\_416314 hCoV-19/Hong Kong/CUHK1/2020 Asia / Hong Kong 2020-02-07 Department of  
Microbiology, Faculty of Medicine, The Chinese University of Hong Kong, Hong Kong SAR, China Department of  
Microbiology, Faculty of Medicine, Chinese University of Hong Kong, Hong Kong SAR, China Zigui Chen,  
Paul KS Chan

EPI\_ISL\_416316 hCoV-19/Shanghai/SH0002/2020 Asia / China / Shanghai 2020-01-25 Shanghai Public Health  
Clinical Center, Shanghai Medical College, Fudan University National Research Center for Translational  
Medicine (Shanghai), Ruijin Hospital affiliated to Shanghai Jiao Tong University School of Medicine & Shanghai  
Public Health Clinical Center Shengyue Wang, Xiaonan Zhang, Gang Lu, Yun Tan, Yun Ling, Hongzhou Lu, Saijuan  
Chen

EPI\_ISL\_416317 hCoV-19/Shanghai/SH0003/2020 Asia / China / Shanghai 2020-01-25 Shanghai Public Health  
Clinical Center, Shanghai Medical College, Fudan University National Research Center for Translational  
Medicine (Shanghai), Ruijin Hospital affiliated to Shanghai Jiao Tong University School of Medicine & Shanghai  
Public Health Clinical Center Shengyue Wang, Xiaonan Zhang, Gang Lu, Yun Tan, Yun Ling, Hongzhou Lu, Saijuan  
Chen

EPI\_ISL\_416318 hCoV-19/Shanghai/SH0004/2020 Asia / China / Shanghai 2020-01-28 Shanghai Public Health  
Clinical Center, Shanghai Medical College, Fudan University National Research Center for Translational  
Medicine (Shanghai), Ruijin Hospital affiliated to Shanghai Jiao Tong University School of Medicine & Shanghai  
Public Health Clinical Center Shengyue Wang, Xiaonan Zhang, Gang Lu, Yun Tan, Yun Ling, Hongzhou Lu, Saijuan  
Chen

EPI\_ISL\_416319 hCoV-19/Shanghai/SH0005/2020 Asia / China / Shanghai 2020-01-28 Shanghai Public Health  
Clinical Center, Shanghai Medical College, Fudan University National Research Center for Translational  
Medicine (Shanghai), Ruijin Hospital affiliated to Shanghai Jiao Tong University School of Medicine & Shanghai  
Public Health Clinical Center Shengyue Wang, Xiaonan Zhang, Gang Lu, Yun Tan, Yun Ling, Hongzhou Lu, Saijuan  
Chen

EPI\_ISL\_416320 hCoV-19/Shanghai/SH0007/2020 Asia / China / Shanghai 2020-01-28 Shanghai Public Health  
Clinical Center, Shanghai Medical College, Fudan University National Research Center for Translational  
Medicine (Shanghai), Ruijin Hospital affiliated to Shanghai Jiao Tong University School of Medicine & Shanghai









Public Health Clinical Center Shengyue Wang, Xiaonan Zhang, Gang Lu, Yun Tan, Yun Ling, Hongzhou Lu, Saijuan Chen

EPI\_ISL\_416398 hCoV-19/Shanghai/SH0109/2020 Asia / China / Shanghai 2020-02-02 Shanghai Public Health Clinical Center, Shanghai Medical College, Fudan University National Research Center for Translational Medicine (Shanghai), Ruijin Hospital affiliated to Shanghai Jiao Tong University School of Medicine & Shanghai Public Health Clinical Center Shengyue Wang, Xiaonan Zhang, Gang Lu, Yun Tan, Yun Ling, Hongzhou Lu, Saijuan Chen

EPI\_ISL\_416399 hCoV-19/Shanghai/SH0110/2020 Asia / China / Shanghai 2020-02-13 Shanghai Public Health Clinical Center, Shanghai Medical College, Fudan University National Research Center for Translational Medicine (Shanghai), Ruijin Hospital affiliated to Shanghai Jiao Tong University School of Medicine & Shanghai Public Health Clinical Center Shengyue Wang, Xiaonan Zhang, Gang Lu, Yun Tan, Yun Ling, Hongzhou Lu, Saijuan Chen

EPI\_ISL\_417370 hCoV-19/USA/WA-UW221/2020 North America / USA / Washington 2020-03-14 UW Virology Lab UW Virology Lab Pavitra Roychoudhury, Hong Xie, Keith Jerome, Alexander Greninger

EPI\_ISL\_417371 hCoV-19/USA/WA-UW222/2020 North America / USA / Washington 2020-03-13 UW Virology Lab UW Virology Lab Pavitra Roychoudhury, Hong Xie, Keith Jerome, Alexander Greninger

EPI\_ISL\_417372 hCoV-19/USA/CT-UW223/2020 North America / USA / Connecticut 2020-03-13 UW Virology Lab UW Virology Lab Pavitra Roychoudhury, Hong Xie, Keith Jerome, Alexander Greninger

EPI\_ISL\_417373 hCoV-19/USA/CT-UW224/2020 North America / USA / Connecticut 2020-03-13 UW Virology Lab UW Virology Lab Pavitra Roychoudhury, Hong Xie, Keith Jerome, Alexander Greninger

EPI\_ISL\_417374 hCoV-19/USA/WA-UW225/2020 North America / USA / Washington 2020-03-15 UW Virology Lab UW Virology Lab Pavitra Roychoudhury, Hong Xie, Keith Jerome, Alexander Greninger

EPI\_ISL\_417375 hCoV-19/USA/WA-UW226/2020 North America / USA / Washington 2020-03-15 UW Virology Lab UW Virology Lab Pavitra Roychoudhury, Hong Xie, Keith Jerome, Alexander Greninger

EPI\_ISL\_417376 hCoV-19/USA/WA-UW227/2020 North America / USA / Washington 2020-03-15 UW Virology Lab UW Virology Lab Pavitra Roychoudhury, Hong Xie, Keith Jerome, Alexander Greninger

EPI\_ISL\_417377 hCoV-19/USA/WA-UW228/2020 North America / USA / Washington 2020-03-15 UW Virology Lab UW Virology Lab Pavitra Roychoudhury, Hong Xie, Keith Jerome, Alexander Greninger

EPI\_ISL\_417378 hCoV-19/USA/WA-UW229/2020 North America / USA / Washington 2020-03-14 UW Virology Lab UW Virology Lab Pavitra Roychoudhury, Hong Xie, Keith Jerome, Alexander Greninger

EPI\_ISL\_417379 hCoV-19/USA/WA-UW230/2020 North America / USA / Washington 2020-03-15 UW Virology Lab UW Virology Lab Pavitra Roychoudhury, Hong Xie, Keith Jerome, Alexander Greninger

EPI\_ISL\_417380 hCoV-19/USA/WA-UW231/2020 North America / USA / Washington 2020-03-14 UW Virology Lab UW Virology Lab Pavitra Roychoudhury, Hong Xie, Keith Jerome, Alexander Greninger

EPI\_ISL\_417381 hCoV-19/USA/WA-UW232/2020 North America / USA / Washington 2020-03-14 UW Virology Lab UW Virology Lab Pavitra Roychoudhury, Hong Xie, Keith Jerome, Alexander Greninger

EPI\_ISL\_417382 hCoV-19/USA/WA-UW233/2020 North America / USA / Washington 2020-03-15 UW Virology Lab UW Virology Lab Pavitra Roychoudhury, Hong Xie, Keith Jerome, Alexander Greninger

EPI\_ISL\_417383 hCoV-19/Australia/NSW15/2020 Oceania / Australia / New South Wales / Sydney 2020-03-03 Centre for Infectious Diseases and Microbiology Public Health NSW Health Pathology - Institute of Clinical Pathology and Medical Research; Westmead Hospital; University of Sydney Rockett R, Eden J-S, Lam C, Gray K, Timms V, Gall M, Arnott A, Sadsad R, Carter I, Rahman H, Holmes EC, O'Sullivan MV, Sintchenko V, Chen SC, Maddocks S, Kok J and Dwyer DE for the 2019-nCoV Study Group

EPI\_ISL\_417384 hCoV-19/Australia/NSW18/2020 Oceania / Australia / New South Wales / Sydney 2020-03-05 Centre for Infectious Diseases and Microbiology Public Health NSW Health Pathology - Institute of Clinical Pathology and Medical Research; Westmead Hospital; University of Sydney Eden J-S, Lam C, Gray K, Timms V, Gall M, Arnott A, Sadsad R, Carter I, Rahman H, Holmes EC, O'Sullivan MV, Sintchenko V, Chen SC, Maddocks S, Kok J, Dwyer DE and Rockett R for the 2019-nCoV Study Group

EPI\_ISL\_417385 hCoV-19/Australia/NSW19/2020 Oceania / Australia / New South Wales / Sydney 2020-03-06 Centre for Infectious Diseases and Microbiology Public Health NSW Health Pathology - Institute of Clinical Pathology and Medical Research; Westmead Hospital; University of Sydney Lam C, Gray K, Timms V, Gall M, Arnott A, Sadsad R, Carter I, Rahman H, Holmes EC, O'Sullivan MV, Sintchenko V, Chen SC, Maddocks S, Kok J, Dwyer DE, Rockett R and Eden J-S for the 2019-nCoV Study Group

EPI\_ISL\_417386 hCoV-19/Australia/NSW21/2020 Oceania / Australia / New South Wales / Sydney 2020-03-04 Centre for Infectious Diseases and Microbiology Public Health NSW Health Pathology - Institute of Clinical Pathology and Medical Research; Westmead Hospital; University of Sydney Gray K, Timms V, Gall M, Arnott A, Sadsad R, Carter I, Rahman H, Holmes EC, O'Sullivan MV, Sintchenko V, Chen SC, Maddocks S, Kok J, Dwyer DE, Rockett R, Eden J-S and Lam C for the 2019-nCoV Study Group

EPI\_ISL\_417387 hCoV-19/Australia/NSW24/2020 Oceania / Australia / New South Wales / Sydney 2020-03-06 Centre for Infectious Diseases and Microbiology Public Health NSW Health Pathology - Institute of Clinical Pathology and Medical Research; Westmead Hospital; University of Sydney Timms V, Gall M, Arnott A, Sadsad R, Carter I, Rahman H, Holmes EC, O'Sullivan MV, Sintchenko V, Chen SC, Maddocks S, Kok J, Dwyer DE, Rockett R, Eden J-S, Lam C and Gray K for the 2019-nCoV Study Group

EPI\_ISL\_417388 hCoV-19/Australia/NSW25/2020 Oceania / Australia / New South Wales / Sydney 2020-03-05 Centre for Infectious Diseases and Microbiology Public Health NSW Health Pathology - Institute of Clinical Pathology and Medical Research; Westmead Hospital; University of Sydney Gall M, Arnott A, Sadsad R, Carter I, Rahman H, Holmes EC, O'Sullivan MV, Sintchenko V, Chen SC, Maddocks S, Kok J, Dwyer DE, Rockett R, Eden J-S, Lam C, Gray K and Timms V for the 2019-nCoV Study Group

EPI\_ISL\_417389 hCoV-19/Australia/NSW26/2020 Oceania / Australia / New South Wales / Sydney 2020-03-09 Centre for Infectious Diseases and Microbiology Public Health NSW Health Pathology - Institute of Clinical



Pathology and Medical Research; Westmead Hospital; University of Sydney Arnott A, Sadsad R, Carter I, Rahman H, Holmes EC, O'Sullivan MV, Sintchenko V, Chen SC, Maddocks S, Kok J, Dwyer DE, Rockett R, Eden J-S, Lam C, Gray K, Timms V and Gall M for the 2019-nCoV Study Group

EPI\_ISL\_417507 hCoV-19/USA/WI-UW-23/2020 North America / USA / Wisconsin 2020-03-17 University of Wisconsin-Madison AIDS Vaccine Research Laboratories University of Wisconsin-Madison AIDS Vaccine Research Laboratories Gage Moreno, Katarina Braun, et al. AIDS Vaccine Research Laboratories

EPI\_ISL\_417508 hCoV-19/USA/WI-UW-21/2020 North America / USA / Wisconsin 2020-03-16 University of Wisconsin-Madison AIDS Vaccine Research Laboratories University of Wisconsin-Madison AIDS Vaccine Research Laboratories Gage Moreno, Katarina Braun, et al. AIDS Vaccine Research Laboratories

EPI\_ISL\_417509 hCoV-19/USA/WI-UW-16/2020 North America / USA / Wisconsin 2020-03-14 University of Wisconsin-Madison AIDS Vaccine Research Laboratories University of Wisconsin-Madison AIDS Vaccine Research Laboratories Gage Moreno, Katarina Braun, et al. AIDS Vaccine Research Laboratories

EPI\_ISL\_417510 hCoV-19/USA/WI-UW-19/2020 North America / USA / Wisconsin 2020-03-16 University of Wisconsin-Madison AIDS Vaccine Research Laboratories University of Wisconsin-Madison AIDS Vaccine Research Laboratories Gage Moreno, Katarina Braun, et al. AIDS Vaccine Research Laboratories

EPI\_ISL\_417512 hCoV-19/USA/WI-UW-24/2020 North America / USA / Wisconsin 2020-03-15 University of Wisconsin-Madison AIDS Vaccine Research Laboratories University of Wisconsin-Madison AIDS Vaccine Research Laboratories Gage Moreno, Katarina Braun, et al. AIDS Vaccine Research Laboratories

EPI\_ISL\_417513 hCoV-19/USA/WI-UW-14/2020 North America / USA / Wisconsin 2020-03-16 University of Wisconsin-Madison AIDS Vaccine Research Laboratories University of Wisconsin-Madison AIDS Vaccine Research Laboratories Gage Moreno, Katarina Braun, et al. AIDS Vaccine Research Laboratories

EPI\_ISL\_417514 hCoV-19/USA/WI-UW-22/2020 North America / USA / Wisconsin 2020-03-13 University of Wisconsin-Madison AIDS Vaccine Research Laboratories University of Wisconsin-Madison AIDS Vaccine Research Laboratories Gage Moreno, Katarina Braun, et al. AIDS Vaccine Research Laboratories

EPI\_ISL\_417515 hCoV-19/USA/WI-UW-18/2020 North America / USA / Wisconsin 2020-03-17 University of Wisconsin-Madison AIDS Vaccine Research Laboratories University of Wisconsin-Madison AIDS Vaccine Research Laboratories Gage Moreno, Katarina Braun, et al. AIDS Vaccine Research Laboratories

EPI\_ISL\_417516 hCoV-19/USA/WI-UW-13/2020 North America / USA / Wisconsin 2020-03-15 University of Wisconsin-Madison AIDS Vaccine Research Laboratories University of Wisconsin-Madison AIDS Vaccine Research Laboratories Gage Moreno, Katarina Braun, et al. AIDS Vaccine Research Laboratories

EPI\_ISL\_417517 hCoV-19/USA/WI-UW-17/2020 North America / USA / Wisconsin 2020-03-13 University of Wisconsin-Madison AIDS Vaccine Research Laboratories University of Wisconsin-Madison AIDS Vaccine Research Laboratories Gage Moreno, Katarina Braun, et al. AIDS Vaccine Research Laboratories

EPI\_ISL\_417519 hCoV-19/Taiwan/CGMH-CGU-06/2020 Asia / Taiwan / Taoyuan 2020-03-05 Laboratory Medicine Department of Laboratory Medicine, Lin-Kou Chang Gung Memorial Hospital, Taoyuan, Taiwan Kuo-Chien Tsao, Yu-Nong Gong, Shu-Li Yang, Yi-Chun Liu, Chung-Guei Huang, Po-Wei Huang, Mei-Jen Hsiao, Cheng-Ta Yang, Cheng-Hsun Chiu, Peng-Nien Huang, Kuo-Ming Lee, Guang-Wu Chen , Shin-Ru Shih

EPI\_ISL\_417520 hCoV-19/Taiwan/CGMH-CGU-07/2020 Asia / Taiwan / Taoyuan 2020-03-09 Laboratory Medicine Department of Laboratory Medicine, Lin-Kou Chang Gung Memorial Hospital, Taoyuan, Taiwan Kuo-Chien Tsao, Yu-Nong Gong, Shu-Li Yang, Yi-Chun Liu, Chung-Guei Huang, Po-Wei Huang, Mei-Jen Hsiao, Cheng-Ta Yang, Cheng-Hsun Chiu, Peng-Nien Huang, Kuo-Ming Lee, Guang-Wu Chen , Shin-Ru Shih

EPI\_ISL\_417521 hCoV-19/Taiwan/CGMH-CGU-08/2020 Asia / Taiwan / Taoyuan 2020-03-10 Laboratory Medicine Department of Laboratory Medicine, Lin-Kou Chang Gung Memorial Hospital, Taoyuan, Taiwan Kuo-Chien Tsao, Yu-Nong Gong, Shu-Li Yang, Yi-Chun Liu, Chung-Guei Huang, Po-Wei Huang, Mei-Jen Hsiao, Cheng-Ta Yang, Cheng-Hsun Chiu, Peng-Nien Huang, Kuo-Ming Lee, Guang-Wu Chen , Shin-Ru Shih

EPI\_ISL\_417522 hCoV-19/Taiwan/CGMH-CGU-09/2020 Asia / Taiwan / Taoyuan 2020-03-13 Laboratory Medicine Department of Laboratory Medicine, Lin-Kou Chang Gung Memorial Hospital, Taoyuan, Taiwan Kuo-Chien Tsao, Yu-Nong Gong, Shu-Li Yang, Yi-Chun Liu, Chung-Guei Huang, Po-Wei Huang, Mei-Jen Hsiao, Cheng-Ta Yang, Cheng-Hsun Chiu, Peng-Nien Huang, Kuo-Ming Lee, Guang-Wu Chen , Shin-Ru Shih

EPI\_ISL\_417523 hCoV-19/Taiwan/CGMH-CGU-10/2020 Asia / Taiwan / Taoyuan 2020-03-13 Laboratory Medicine Department of Laboratory Medicine, Lin-Kou Chang Gung Memorial Hospital, Taoyuan, Taiwan Kuo-Chien Tsao, Yu-Nong Gong, Shu-Li Yang, Yi-Chun Liu, Chung-Guei Huang, Po-Wei Huang, Mei-Jen Hsiao, Cheng-Ta Yang, Cheng-Hsun Chiu, Peng-Nien Huang, Kuo-Ming Lee, Guang-Wu Chen , Shin-Ru Shih

EPI\_ISL\_417524 hCoV-19/Taiwan/CGMH-CGU-11/2020 Asia / Taiwan / Taoyuan 2020-03-14 Laboratory Medicine Department of Laboratory Medicine, Lin-Kou Chang Gung Memorial Hospital, Taoyuan, Taiwan Kuo-Chien Tsao, Yu-Nong Gong, Shu-Li Yang, Yi-Chun Liu, Chung-Guei Huang, Po-Wei Huang, Mei-Jen Hsiao, Cheng-Ta Yang, Cheng-Hsun Chiu, Peng-Nien Huang, Kuo-Ming Lee, Guang-Wu Chen , Shin-Ru Shih

EPI\_ISL\_417525 hCoV-19/Taiwan/CGMH-CGU-12/2020 Asia / Taiwan / Taoyuan 2020-03-14 Laboratory Medicine Department of Laboratory Medicine, Lin-Kou Chang Gung Memorial Hospital, Taoyuan, Taiwan Kuo-Chien Tsao, Yu-Nong Gong, Shu-Li Yang, Yi-Chun Liu, Chung-Guei Huang, Po-Wei Huang, Mei-Jen Hsiao, Cheng-Ta Yang, Cheng-Hsun Chiu, Peng-Nien Huang, Kuo-Ming Lee, Guang-Wu Chen , Shin-Ru Shih

EPI\_ISL\_417526 hCoV-19/Luxembourg/LNS9371718/2020 Europe / Luxembourg 2020-03-18 Laboratoire Nationale de Santé, Microbiology, Virology Laboratoire Nationale de Santé, Microbiology, Epidemiology and Microbial Genomics Anke Wienecke-Baldacchino, Ardashel Latsuzbaia, Jessica Tapp, Catherine Ragimbeau, Guillaume Fournier, Tamir Abdelrahman, Trung Nguyen Nguyen, Joel Mossong

EPI\_ISL\_417527 hCoV-19/Luxembourg/LNS2848109/2020 Europe / Luxembourg 2020-03-18 Laboratoire Nationale de Santé, Microbiology, Virology Laboratoire Nationale de Santé, Microbiology, Epidemiology and Microbial Genomics Anke Wienecke-Baldacchino, Ardashel Latsuzbaia, Jessica Tapp, Catherine Ragimbeau, Guillaume Fournier, Tamir Abdelrahman, Trung Nguyen Nguyen, Joel Mossong

EPI\_ISL\_417528 hCoV-19/Luxembourg/LNS3694003/2020 Europe / Luxembourg 2020-03-18 Laboratoire























S Gretarsdottir; Kjartan R Gudmundsson; Thora R Gunnarsdottir; Arnaldur Gylfason; Hilma Holm; Brynjar O Jensson; Aslaug Jonasdottir; Kamilla S Josefsdottir; Thordur Kristjansson; Droplaug N Magnusdottir; Louise le Roux; Gudrun Sigmundsdottir; Gardar Sveinbjornsson; Kristin E Sveinsdottir; Maney Sveinsdottir; Emil A Thorarensen; Bjarni Thorbjornsson; Gisli Masson; Ingileif Jonsdottir; Alma Moller; Thorolfur Gudnason; Karl G Kristinsson; Unnur Thorsteinsdottir; Kari Stefansson

EPI\_ISL\_417699 hCoV-19/Iceland/206/2020 Europe / Iceland / Reykjavik 2020-03-16 The National University Hospital of Iceland deCODE genetics Daniel F Gudbjartsson; Agnar Helgason; Hakon Jonsson; Olafur T Magnusson; Pall Melsted; Gudmundur L Norddahl; Jona Saemundsdottir; Asgeir Sigurdsson; Patrick Sulem; Arna B Agustsdottir; Berglind Eiriksdoottir; Run Fridriksdottir; Elisabet E Gardarsdottir; Gudmundur Georgsson; Olafia S Gretarsdottir; Kjartan R Gudmundsson; Thora R Gunnarsdottir; Arnaldur Gylfason; Hilma Holm; Brynjar O Jensson; Aslaug Jonasdottir; Kamilla S Josefsdottir; Thordur Kristjansson; Droplaug N Magnusdottir; Louise le Roux; Gudrun Sigmundsdottir; Gardar Sveinbjornsson; Kristin E Sveinsdottir; Maney Sveinsdottir; Emil A Thorarensen; Bjarni Thorbjornsson; Gisli Masson; Ingileif Jonsdottir; Alma Moller; Thorolfur Gudnason; Karl G Kristinsson; Unnur Thorsteinsdottir; Kari Stefansson

EPI\_ISL\_418816 hCoV-19/Canada/BC\_0443574/2020 North America / Canada / British Columbia 2020-03-11 BCCDC Public Health Laboratory BCCDC Public Health Laboratory Harrigan, Prystajacky, Krajden, Lee, Kamelian, Lapointe, Choi, Hoang, Sekirov, Levett, Tyson, Snutch, Loman, Quick, Li, Gilmour

EPI\_ISL\_418817 hCoV-19/Canada/BC\_0554880/2020 North America / Canada / British Columbia 2020-03-13 BCCDC Public Health Laboratory BCCDC Public Health Laboratory Harrigan, Prystajacky, Krajden, Lee, Kamelian, Lapointe, Choi, Hoang, Sekirov, Levett, Tyson, Snutch, Loman, Quick, Li, Gilmour

EPI\_ISL\_418818 hCoV-19/Canada/BC\_1318414/2020 North America / Canada / British Columbia 2020-03-06 BCCDC Public Health Laboratory BCCDC Public Health Laboratory Harrigan, Prystajacky, Krajden, Lee, Kamelian, Lapointe, Choi, Hoang, Sekirov, Levett, Tyson, Snutch, Loman, Quick, Li, Gilmour

EPI\_ISL\_418838 hCoV-19/Canada/BC\_6404889/2020 North America / Canada / British Columbia 2020-03-12 BCCDC Public Health Laboratory BCCDC Public Health Laboratory Harrigan, Prystajacky, Krajden, Lee, Kamelian, Lapointe, Choi, Hoang, Sekirov, Levett, Tyson, Snutch, Loman, Quick, Li, Gilmour

EPI\_ISL\_418839 hCoV-19/Canada/BC\_6489864/2020 North America / Canada / British Columbia 2020-03-10 BCCDC Public Health Laboratory BCCDC Public Health Laboratory Harrigan, Prystajacky, Krajden, Lee, Kamelian, Lapointe, Choi, Hoang, Sekirov, Levett, Tyson, Snutch, Loman, Quick, Li, Gilmour

EPI\_ISL\_418840 hCoV-19/Canada/BC\_6502001/2020 North America / Canada / British Columbia 2020-03-12 BCCDC Public Health Laboratory BCCDC Public Health Laboratory Harrigan, Prystajacky, Krajden, Lee, Kamelian, Lapointe, Choi, Hoang, Sekirov, Levett, Tyson, Snutch, Loman, Quick, Li, Gilmour

EPI\_ISL\_418841 hCoV-19/Canada/BC\_6981299/2020 North America / Canada / British Columbia 2020-03-11 BCCDC Public Health Laboratory BCCDC Public Health Laboratory Harrigan, Prystajacky, Krajden, Lee, Kamelian, Lapointe, Choi, Hoang, Sekirov, Levett, Tyson, Snutch, Loman, Quick, Li, Gilmour

EPI\_ISL\_418842 hCoV-19/Canada/BC\_6997898/2020 North America / Canada / British Columbia 2020-03-11 BCCDC Public Health Laboratory BCCDC Public Health Laboratory Harrigan, Prystajacky, Krajden, Lee, Kamelian, Lapointe, Choi, Hoang, Sekirov, Levett, Tyson, Snutch, Loman, Quick, Li, Gilmour

EPI\_ISL\_418843 hCoV-19/Canada/BC\_7277381/2020 North America / Canada / British Columbia 2020-03-12 BCCDC Public Health Laboratory BCCDC Public Health Laboratory Harrigan, Prystajacky, Krajden, Lee, Kamelian, Lapointe, Choi, Hoang, Sekirov, Levett, Tyson, Snutch, Loman, Quick, Li, Gilmour

EPI\_ISL\_418845 hCoV-19/Canada/BC\_7515663/2020 North America / Canada / British Columbia 2020-03-11 BCCDC Public Health Laboratory BCCDC Public Health Laboratory Harrigan, Prystajacky, Krajden, Lee, Kamelian, Lapointe, Choi, Hoang, Sekirov, Levett, Tyson, Snutch, Loman, Quick, Li, Gilmour

EPI\_ISL\_418846 hCoV-19/Canada/BC\_7553799/2020 North America / Canada / British Columbia 2020-03-12 BCCDC Public Health Laboratory BCCDC Public Health Laboratory Harrigan, Prystajacky, Krajden, Lee, Kamelian, Lapointe, Choi, Hoang, Sekirov, Levett, Tyson, Snutch, Loman, Quick, Li, Gilmour

EPI\_ISL\_418847 hCoV-19/Canada/BC\_8150537/2020 North America / Canada / British Columbia 2020-03-12 BCCDC Public Health Laboratory BCCDC Public Health Laboratory Harrigan, Prystajacky, Krajden, Lee, Kamelian, Lapointe, Choi, Hoang, Sekirov, Levett, Tyson, Snutch, Loman, Quick, Li, Gilmour

EPI\_ISL\_418848 hCoV-19/Canada/BC\_8159203/2020 North America / Canada / British Columbia 2020-03-05 BCCDC Public Health Laboratory BCCDC Public Health Laboratory Harrigan, Prystajacky, Krajden, Lee, Kamelian, Lapointe, Choi, Hoang, Sekirov, Levett, Tyson, Snutch, Loman, Quick, Li, Gilmour

EPI\_ISL\_418849 hCoV-19/Canada/BC\_8486790/2020 North America / Canada / British Columbia 2020-03-13 BCCDC Public Health Laboratory BCCDC Public Health Laboratory Harrigan, Prystajacky, Krajden, Lee, Kamelian, Lapointe, Choi, Hoang, Sekirov, Levett, Tyson, Snutch, Loman, Quick, Li, Gilmour

EPI\_ISL\_418851 hCoV-19/Canada/BC\_8622445/2020 North America / Canada / British Columbia 2020-03-13 BCCDC Public Health Laboratory BCCDC Public Health Laboratory Harrigan, Prystajacky, Krajden, Lee, Kamelian, Lapointe, Choi, Hoang, Sekirov, Levett, Tyson, Snutch, Loman, Quick, Li, Gilmour

EPI\_ISL\_418852 hCoV-19/Canada/BC\_8718874/2020 North America / Canada / British Columbia 2020-03-07 BCCDC Public Health Laboratory BCCDC Public Health Laboratory Harrigan, Prystajacky, Krajden, Lee, Kamelian, Lapointe, Choi, Hoang, Sekirov, Levett, Tyson, Snutch, Loman, Quick, Li, Gilmour

EPI\_ISL\_418853 hCoV-19/Canada/BC\_8894200/2020 North America / Canada / British Columbia 2020-03-11 BCCDC Public Health Laboratory BCCDC Public Health Laboratory Harrigan, Prystajacky, Krajden, Lee, Kamelian, Lapointe, Choi, Hoang, Sekirov, Levett, Tyson, Snutch, Loman, Quick, Li, Gilmour

EPI\_ISL\_418854 hCoV-19/Canada/BC\_8896915/2020 North America / Canada / British Columbia 2020-03-11 BCCDC Public Health Laboratory BCCDC Public Health Laboratory Harrigan, Prystajacky, Krajden, Lee, Kamelian, Lapointe, Choi, Hoang, Sekirov, Levett, Tyson, Snutch, Loman, Quick, Li, Gilmour

EPI\_ISL\_418855 hCoV-19/Canada/BC\_8897642/2020 North America / Canada / British Columbia 2020-03-11 BCCDC Public Health Laboratory BCCDC Public Health Laboratory Harrigan, Prystajacky, Krajden, Lee, Kamelian,



|                                                                                                                                                                                                                                                                                                                                                                                                                   |                                                                                   |                                            |            |                                 |
|-------------------------------------------------------------------------------------------------------------------------------------------------------------------------------------------------------------------------------------------------------------------------------------------------------------------------------------------------------------------------------------------------------------------|-----------------------------------------------------------------------------------|--------------------------------------------|------------|---------------------------------|
| EPI_ISL_418931                                                                                                                                                                                                                                                                                                                                                                                                    | hCoV-19/USA/WA-UW364/2020                                                         | North America / USA / Washington           | 2020-03-17 | UW                              |
| Virology Lab                                                                                                                                                                                                                                                                                                                                                                                                      | UW Virology Lab Pavitra Roychoudhury, Hong Xie, Keith Jerome, Alexander Greninger |                                            |            |                                 |
| EPI_ISL_418932                                                                                                                                                                                                                                                                                                                                                                                                    | hCoV-19/USA/WA-UW365/2020                                                         | North America / USA / Washington           | 2020-03-16 | UW                              |
| Virology Lab                                                                                                                                                                                                                                                                                                                                                                                                      | UW Virology Lab Pavitra Roychoudhury, Hong Xie, Keith Jerome, Alexander Greninger |                                            |            |                                 |
| EPI_ISL_418933                                                                                                                                                                                                                                                                                                                                                                                                    | hCoV-19/USA/WA-UW366/2020                                                         | North America / USA / Washington           | 2020-03-17 | UW                              |
| Virology Lab                                                                                                                                                                                                                                                                                                                                                                                                      | UW Virology Lab Pavitra Roychoudhury, Hong Xie, Keith Jerome, Alexander Greninger |                                            |            |                                 |
| EPI_ISL_418934                                                                                                                                                                                                                                                                                                                                                                                                    | hCoV-19/USA/WA-UW367/2020                                                         | North America / USA / Washington           | 2020-03-17 | UW                              |
| Virology Lab                                                                                                                                                                                                                                                                                                                                                                                                      | UW Virology Lab Pavitra Roychoudhury, Hong Xie, Keith Jerome, Alexander Greninger |                                            |            |                                 |
| EPI_ISL_418935                                                                                                                                                                                                                                                                                                                                                                                                    | hCoV-19/USA/WA-UW368/2020                                                         | North America / USA / Washington           | 2020-03-16 | UW                              |
| Virology Lab                                                                                                                                                                                                                                                                                                                                                                                                      | UW Virology Lab Pavitra Roychoudhury, Hong Xie, Keith Jerome, Alexander Greninger |                                            |            |                                 |
| EPI_ISL_418936                                                                                                                                                                                                                                                                                                                                                                                                    | hCoV-19/USA/WA-UW369/2020                                                         | North America / USA / Washington           | 2020-03-17 | UW                              |
| Virology Lab                                                                                                                                                                                                                                                                                                                                                                                                      | UW Virology Lab Pavitra Roychoudhury, Hong Xie, Keith Jerome, Alexander Greninger |                                            |            |                                 |
| EPI_ISL_418937                                                                                                                                                                                                                                                                                                                                                                                                    | hCoV-19/USA/WA-UW370/2020                                                         | North America / USA / Washington           | 2020-03-17 | UW                              |
| Virology Lab                                                                                                                                                                                                                                                                                                                                                                                                      | UW Virology Lab Pavitra Roychoudhury, Hong Xie, Keith Jerome, Alexander Greninger |                                            |            |                                 |
| EPI_ISL_418938                                                                                                                                                                                                                                                                                                                                                                                                    | hCoV-19/USA/WA-UW371/2020                                                         | North America / USA / Washington           | 2020-03-16 | UW                              |
| Virology Lab                                                                                                                                                                                                                                                                                                                                                                                                      | UW Virology Lab Pavitra Roychoudhury, Hong Xie, Keith Jerome, Alexander Greninger |                                            |            |                                 |
| EPI_ISL_418939                                                                                                                                                                                                                                                                                                                                                                                                    | hCoV-19/USA/WA-UW372/2020                                                         | North America / USA / Washington           | 2020-03-17 | UW                              |
| Virology Lab                                                                                                                                                                                                                                                                                                                                                                                                      | UW Virology Lab Pavitra Roychoudhury, Hong Xie, Keith Jerome, Alexander Greninger |                                            |            |                                 |
| EPI_ISL_418940                                                                                                                                                                                                                                                                                                                                                                                                    | hCoV-19/USA/WA-UW373/2020                                                         | North America / USA / Washington           | 2020-03-17 | UW                              |
| Virology Lab                                                                                                                                                                                                                                                                                                                                                                                                      | UW Virology Lab Pavitra Roychoudhury, Hong Xie, Keith Jerome, Alexander Greninger |                                            |            |                                 |
| EPI_ISL_418941                                                                                                                                                                                                                                                                                                                                                                                                    | hCoV-19/USA/WA-UW374/2020                                                         | North America / USA                        | 2020-03    | UW Virology Lab UW Virology Lab |
| Pavitra Roychoudhury, Hong Xie, Keith Jerome, Alexander Greninger                                                                                                                                                                                                                                                                                                                                                 |                                                                                   |                                            |            |                                 |
| EPI_ISL_418942                                                                                                                                                                                                                                                                                                                                                                                                    | hCoV-19/USA/WA-UW375/2020                                                         | North America / USA / Washington           | 2020-03-17 | UW                              |
| Virology Lab                                                                                                                                                                                                                                                                                                                                                                                                      | UW Virology Lab Pavitra Roychoudhury, Hong Xie, Keith Jerome, Alexander Greninger |                                            |            |                                 |
| EPI_ISL_418943                                                                                                                                                                                                                                                                                                                                                                                                    | hCoV-19/USA/WA-UW376/2020                                                         | North America / USA / Washington           | 2020-03-17 | UW                              |
| Virology Lab                                                                                                                                                                                                                                                                                                                                                                                                      | UW Virology Lab Pavitra Roychoudhury, Hong Xie, Keith Jerome, Alexander Greninger |                                            |            |                                 |
| EPI_ISL_418944                                                                                                                                                                                                                                                                                                                                                                                                    | hCoV-19/USA/WA-UW378/2020                                                         | North America / USA / Washington           | 2020-03-15 | UW                              |
| Virology Lab                                                                                                                                                                                                                                                                                                                                                                                                      | UW Virology Lab Pavitra Roychoudhury, Hong Xie, Keith Jerome, Alexander Greninger |                                            |            |                                 |
| EPI_ISL_418945                                                                                                                                                                                                                                                                                                                                                                                                    | hCoV-19/USA/WA-UW379/2020                                                         | North America / USA / Washington           | 2020-03-15 | UW                              |
| Virology Lab                                                                                                                                                                                                                                                                                                                                                                                                      | UW Virology Lab Pavitra Roychoudhury, Hong Xie, Keith Jerome, Alexander Greninger |                                            |            |                                 |
| EPI_ISL_418948                                                                                                                                                                                                                                                                                                                                                                                                    | hCoV-19/USA/WA-UW383/2020                                                         | North America / USA / Washington           | 2020-03-16 | UW                              |
| Virology Lab                                                                                                                                                                                                                                                                                                                                                                                                      | UW Virology Lab Pavitra Roychoudhury, Hong Xie, Keith Jerome, Alexander Greninger |                                            |            |                                 |
| EPI_ISL_418949                                                                                                                                                                                                                                                                                                                                                                                                    | hCoV-19/USA/WA-UW384/2020                                                         | North America / USA / Washington           | 2020-03-16 | UW                              |
| Virology Lab                                                                                                                                                                                                                                                                                                                                                                                                      | UW Virology Lab Pavitra Roychoudhury, Hong Xie, Keith Jerome, Alexander Greninger |                                            |            |                                 |
| EPI_ISL_418950                                                                                                                                                                                                                                                                                                                                                                                                    | hCoV-19/USA/WA-UW385/2020                                                         | North America / USA / Washington           | 2020-03-16 | UW                              |
| Virology Lab                                                                                                                                                                                                                                                                                                                                                                                                      | UW Virology Lab Pavitra Roychoudhury, Hong Xie, Keith Jerome, Alexander Greninger |                                            |            |                                 |
| EPI_ISL_418951                                                                                                                                                                                                                                                                                                                                                                                                    | hCoV-19/USA/WA-UW386/2020                                                         | North America / USA / Washington           | 2020-03-16 | UW                              |
| Virology Lab                                                                                                                                                                                                                                                                                                                                                                                                      | UW Virology Lab Pavitra Roychoudhury, Hong Xie, Keith Jerome, Alexander Greninger |                                            |            |                                 |
| EPI_ISL_418952                                                                                                                                                                                                                                                                                                                                                                                                    | hCoV-19/USA/WA-UW387/2020                                                         | North America / USA / Washington           | 2020-03-16 | UW                              |
| Virology Lab                                                                                                                                                                                                                                                                                                                                                                                                      | UW Virology Lab Pavitra Roychoudhury, Hong Xie, Keith Jerome, Alexander Greninger |                                            |            |                                 |
| EPI_ISL_418953                                                                                                                                                                                                                                                                                                                                                                                                    | hCoV-19/USA/WA-UW388/2020                                                         | North America / USA / Washington           | 2020-03-16 | UW                              |
| Virology Lab                                                                                                                                                                                                                                                                                                                                                                                                      | UW Virology Lab Pavitra Roychoudhury, Hong Xie, Keith Jerome, Alexander Greninger |                                            |            |                                 |
| EPI_ISL_418954                                                                                                                                                                                                                                                                                                                                                                                                    | hCoV-19/USA/WA-UW389/2020                                                         | North America / USA / Washington           | 2020-03-17 | UW                              |
| Virology Lab                                                                                                                                                                                                                                                                                                                                                                                                      | UW Virology Lab Pavitra Roychoudhury, Hong Xie, Keith Jerome, Alexander Greninger |                                            |            |                                 |
| EPI_ISL_418955                                                                                                                                                                                                                                                                                                                                                                                                    | hCoV-19/USA/WA-UW390/2020                                                         | North America / USA / Washington           | 2020-03-15 | UW                              |
| Virology Lab                                                                                                                                                                                                                                                                                                                                                                                                      | UW Virology Lab Pavitra Roychoudhury, Hong Xie, Keith Jerome, Alexander Greninger |                                            |            |                                 |
| EPI_ISL_418956                                                                                                                                                                                                                                                                                                                                                                                                    | hCoV-19/USA/VA-DCLS-0002/2020                                                     | North America / USA / Virginia             | 2020-03-17 | Virginia DCLS                   |
| Virginia DCLS                                                                                                                                                                                                                                                                                                                                                                                                     | Virginia DCLS                                                                     |                                            |            |                                 |
| EPI_ISL_418957                                                                                                                                                                                                                                                                                                                                                                                                    | hCoV-19/USA/VA-DCLS-0003/2020                                                     | North America / USA / Virginia             | 2020-03-17 | Virginia DCLS                   |
| Virginia DCLS                                                                                                                                                                                                                                                                                                                                                                                                     | Virginia DCLS                                                                     |                                            |            |                                 |
| EPI_ISL_418958                                                                                                                                                                                                                                                                                                                                                                                                    | hCoV-19/USA/VA-DCLS-0004/2020                                                     | North America / USA / Virginia             | 2020-03-17 | Virginia DCLS                   |
| Virginia DCLS                                                                                                                                                                                                                                                                                                                                                                                                     | Virginia DCLS                                                                     |                                            |            |                                 |
| EPI_ISL_418962                                                                                                                                                                                                                                                                                                                                                                                                    | hCoV-19/USA/UT-019/2020                                                           | North America / USA / Utah                 | 2020-03-13 | Utah Public Health              |
| Laboratory                                                                                                                                                                                                                                                                                                                                                                                                        | Utah Public Health Laboratory Erin Young, Kelly Oakeson                           |                                            |            |                                 |
| EPI_ISL_418963                                                                                                                                                                                                                                                                                                                                                                                                    | hCoV-19/USA/UT-021/2020                                                           | North America / USA / Utah                 | 2020-03-14 | Utah Public Health              |
| Laboratory                                                                                                                                                                                                                                                                                                                                                                                                        | Utah Public Health Laboratory Erin Young, Kelly Oakeson                           |                                            |            |                                 |
| EPI_ISL_418964                                                                                                                                                                                                                                                                                                                                                                                                    | hCoV-19/USA/UT-022/2020                                                           | North America / USA / Utah                 | 2020-03-14 | Utah Public Health              |
| Laboratory                                                                                                                                                                                                                                                                                                                                                                                                        | Utah Public Health Laboratory Erin Young, Kelly Oakeson                           |                                            |            |                                 |
| EPI_ISL_418965                                                                                                                                                                                                                                                                                                                                                                                                    | hCoV-19/USA/UT-023/2020                                                           | North America / USA / Utah                 | 2020-03-11 | Utah Public Health              |
| Laboratory                                                                                                                                                                                                                                                                                                                                                                                                        | Utah Public Health Laboratory Erin Young, Kelly Oakeson                           |                                            |            |                                 |
| EPI_ISL_418967                                                                                                                                                                                                                                                                                                                                                                                                    | hCoV-19/USA/UT-025/2020                                                           | North America / USA / Utah                 | 2020-03-11 | Utah Public Health              |
| Laboratory                                                                                                                                                                                                                                                                                                                                                                                                        | Utah Public Health Laboratory Erin Young, Kelly Oakeson                           |                                            |            |                                 |
| EPI_ISL_418972                                                                                                                                                                                                                                                                                                                                                                                                    | hCoV-19/USA/NY-NYUMC26/2020                                                       | North America / USA / New York / Manhattan | 2020-03-17 |                                 |
| NYU Langone Health                                                                                                                                                                                                                                                                                                                                                                                                | Department of Pathology and Medicine, New York University School of Medicine      |                                            |            | Maria                           |
| Aguero-Rosenfeld, Margaret Black, John Cadley, Paolo Cotzia, John Chen, Dacia Dimartino, Xiaojun Feng, Adriana Heguy, Megan Hogan, Emily Huang, George Jour, Christian Marier, Matthew T. Maurano, Mark J. Mulligan, Peter Meyn, Jared Pinnell, Sitharam Ramaswami, Amy Rapkiewicz, Marie Samanovic-Golden, Antonio Serrano, Guomiao Shen, Matija Snuderl, Nick Vulpescu, Gael Westby, Paul Zappile, Yutong Zhang |                                                                                   |                                            |            |                                 |
| EPI_ISL_418973                                                                                                                                                                                                                                                                                                                                                                                                    | hCoV-19/USA/NY-NYUMC27/2020                                                       | North America / USA / New York / Manhattan | 2020-03-17 |                                 |
| NYU Langone Health                                                                                                                                                                                                                                                                                                                                                                                                | Department of Pathology and Medicine, New York University School of Medicine      |                                            |            | Maria                           |

Aguero-Rosenfeld, Margaret Black, John Cadley, Paolo Cotzia, John Chen, Dacia Dimartino, Xiaojun Feng, Adriana Heguy, Megan Hogan, Emily Huang, George Jour, Christian Marier, Matthew T. Maurano, Mark J. Mulligan, Peter Meyn, Jared Pinnell, Sitharam Ramaswami, Amy Rapkiewicz, Marie Samanovic-Golden, Antonio Serrano, Guomiao Shen, Matija Snuderl, Nick Vulpescu, Gael Westby, Paul Zappile, Yutong Zhang  
EPI\_ISL\_418974 hCoV-19/USA/NY-NYUMC28/2020 North America / USA / New York / Manhattan 2020-03-17  
NYU Langone Health Department of Pathology and Medicine, New York University School of Medicine Maria

Aguero-Rosenfeld, Margaret Black, John Cadley, Paolo Cotzia, John Chen, Dacia Dimartino, Xiaojun Feng, Adriana Heguy, Megan Hogan, Emily Huang, George Jour, Christian Marier, Matthew T. Maurano, Mark J. Mulligan, Peter Meyn, Jared Pinnell, Sitharam Ramaswami, Amy Rapkiewicz, Marie Samanovic-Golden, Antonio Serrano, Guomiao Shen, Matija Snuderl, Nick Vulpescu, Gael Westby, Paul Zappile, Yutong Zhang  
EPI\_ISL\_418975 hCoV-19/USA/NY-NYUMC29/2020 North America / USA / New York / Manhattan 2020-03-17  
NYU Langone Health Department of Pathology and Medicine, New York University School of Medicine Maria

Aguero-Rosenfeld, Margaret Black, John Cadley, Paolo Cotzia, John Chen, Dacia Dimartino, Xiaojun Feng, Adriana Heguy, Megan Hogan, Emily Huang, George Jour, Christian Marier, Matthew T. Maurano, Mark J. Mulligan, Peter Meyn, Jared Pinnell, Sitharam Ramaswami, Amy Rapkiewicz, Marie Samanovic-Golden, Antonio Serrano, Guomiao Shen, Matija Snuderl, Nick Vulpescu, Gael Westby, Paul Zappile, Yutong Zhang  
EPI\_ISL\_418976 hCoV-19/USA/NY-NYUMC30/2020 North America / USA / New York / Manhattan 2020-03-17  
NYU Langone Health Department of Pathology and Medicine, New York University School of Medicine Maria

Aguero-Rosenfeld, Margaret Black, John Cadley, Paolo Cotzia, John Chen, Dacia Dimartino, Xiaojun Feng, Adriana Heguy, Megan Hogan, Emily Huang, George Jour, Christian Marier, Matthew T. Maurano, Mark J. Mulligan, Peter Meyn, Jared Pinnell, Sitharam Ramaswami, Amy Rapkiewicz, Marie Samanovic-Golden, Antonio Serrano, Guomiao Shen, Matija Snuderl, Nick Vulpescu, Gael Westby, Paul Zappile, Yutong Zhang  
EPI\_ISL\_418977 hCoV-19/USA/NY-NYUMC31/2020 North America / USA / New York / Manhattan 2020-03-17  
NYU Langone Health Department of Pathology and Medicine, New York University School of Medicine Maria

Aguero-Rosenfeld, Margaret Black, John Cadley, Paolo Cotzia, John Chen, Dacia Dimartino, Xiaojun Feng, Adriana Heguy, Megan Hogan, Emily Huang, George Jour, Christian Marier, Matthew T. Maurano, Mark J. Mulligan, Peter Meyn, Jared Pinnell, Sitharam Ramaswami, Amy Rapkiewicz, Marie Samanovic-Golden, Antonio Serrano, Guomiao Shen, Matija Snuderl, Nick Vulpescu, Gael Westby, Paul Zappile, Yutong Zhang  
EPI\_ISL\_418978 hCoV-19/USA/NY-NYUMC32/2020 North America / USA / New York / Manhattan 2020-03-17  
NYU Langone Health Department of Pathology and Medicine, New York University School of Medicine Maria

Aguero-Rosenfeld, Margaret Black, John Cadley, Paolo Cotzia, John Chen, Dacia Dimartino, Xiaojun Feng, Adriana Heguy, Megan Hogan, Emily Huang, George Jour, Christian Marier, Matthew T. Maurano, Mark J. Mulligan, Peter Meyn, Jared Pinnell, Sitharam Ramaswami, Amy Rapkiewicz, Marie Samanovic-Golden, Antonio Serrano, Guomiao Shen, Matija Snuderl, Nick Vulpescu, Gael Westby, Paul Zappile, Yutong Zhang  
EPI\_ISL\_418979 hCoV-19/USA/NY-NYUMC33/2020 North America / USA / New York / Manhattan 2020-03-17  
NYU Langone Health Department of Pathology and Medicine, New York University School of Medicine Maria

Aguero-Rosenfeld, Margaret Black, John Cadley, Paolo Cotzia, John Chen, Dacia Dimartino, Xiaojun Feng, Adriana Heguy, Megan Hogan, Emily Huang, George Jour, Christian Marier, Matthew T. Maurano, Mark J. Mulligan, Peter Meyn, Jared Pinnell, Sitharam Ramaswami, Amy Rapkiewicz, Marie Samanovic-Golden, Antonio Serrano, Guomiao Shen, Matija Snuderl, Nick Vulpescu, Gael Westby, Paul Zappile, Yutong Zhang  
EPI\_ISL\_418980 hCoV-19/USA/NY-NYUMC34/2020 North America / USA / New York / Manhattan 2020-03-17  
NYU Langone Health Department of Pathology and Medicine, New York University School of Medicine Maria

Aguero-Rosenfeld, Margaret Black, John Cadley, Paolo Cotzia, John Chen, Dacia Dimartino, Xiaojun Feng, Adriana Heguy, Megan Hogan, Emily Huang, George Jour, Christian Marier, Matthew T. Maurano, Mark J. Mulligan, Peter Meyn, Jared Pinnell, Sitharam Ramaswami, Amy Rapkiewicz, Marie Samanovic-Golden, Antonio Serrano, Guomiao Shen, Matija Snuderl, Nick Vulpescu, Gael Westby, Paul Zappile, Yutong Zhang  
EPI\_ISL\_418981 hCoV-19/Belgium/VRAR-030643/2020 Europe / Belgium / Merelbeke 2020-03-06 KU  
Leuven, Clinical and Epidemiological Virology KU Leuven, Clinical and Epidemiological Virology Bert

Vanmechelen, Joan Marti-Carreras, Tony Wawina, Piet Maes  
EPI\_ISL\_418982 hCoV-19/Belgium/HAA-030953/2020 Europe / Belgium / Oevel 2020-03-09 KU Leuven,  
Clinical and Epidemiological Virology KU Leuven, Clinical and Epidemiological Virology Bert  
Vanmechelen, Joan Marti-Carreras, Tony Wawina, Piet Maes

EPI\_ISL\_418983 hCoV-19/Belgium/DWAE-030954/2020 Europe / Belgium / Asse 2020-03-09 KU Leuven,  
Clinical and Epidemiological Virology KU Leuven, Clinical and Epidemiological Virology Bert  
Vanmechelen, Joan Marti-Carreras, Tony Wawina, Piet Maes

EPI\_ISL\_418984 hCoV-19/Belgium/BG-030955/2020 Europe / Belgium / Kaulile 2020-03-09 KU Leuven,  
Clinical and Epidemiological Virology KU Leuven, Clinical and Epidemiological Virology Bert  
Vanmechelen, Joan Marti-Carreras, Tony Wawina, Piet Maes

EPI\_ISL\_418985 hCoV-19/Belgium/LT-030956/2020 Europe / Belgium / Ellezelles 2020-03-09 KU Leuven,  
Clinical and Epidemiological Virology KU Leuven, Clinical and Epidemiological Virology Bert  
Vanmechelen, Joan Marti-Carreras, Tony Wawina, Piet Maes

EPI\_ISL\_418986 hCoV-19/Belgium/RS-030257/2020 Europe / Belgium / Hoegaarden 2020-03-02 KU Leuven,  
Clinical and Epidemiological Virology KU Leuven, Clinical and Epidemiological Virology Bert  
Vanmechelen, Joan Marti-Carreras, Tony Wawina, Piet Maes

EPI\_ISL\_418987 hCoV-19/Belgium/CG-030158/2020 Europe / Belgium / Eupen 2020-03-01 KU Leuven,  
Clinical and Epidemiological Virology KU Leuven, Clinical and Epidemiological Virology Bert  
Vanmechelen, Joan Marti-Carreras, Tony Wawina, Piet Maes

EPI\_ISL\_418988 hCoV-19/Belgium/JRH-030459/2020 Europe / Belgium / Zolder 2020-03-04 Institute  
information KU Leuven, Clinical and Epidemiological Virology Institute information KU Leuven, Clinical and  
Epidemiological Virology Bert Vanmechelen, Joan Marti-Carreras, Tony Wawina, Piet Maes

|                                                                                                                                                                                                                                                                                                                                                                  |                                  |                                   |            |                                                                                                                                                                                                                               |
|------------------------------------------------------------------------------------------------------------------------------------------------------------------------------------------------------------------------------------------------------------------------------------------------------------------------------------------------------------------|----------------------------------|-----------------------------------|------------|-------------------------------------------------------------------------------------------------------------------------------------------------------------------------------------------------------------------------------|
| EPI_ISL_418989                                                                                                                                                                                                                                                                                                                                                   | hCoV-19/Belgium/RT-030460/2020   | Europe / Belgium / Vorst          | 2020-03-04 | KU Leuven, Bert                                                                                                                                                                                                               |
| Clinical and Epidemiological Virology KU Leuven, Clinical and Epidemiological Virology Vanmechelen, Joan Marti-Carreras, Tony Wawina, Piet Maes                                                                                                                                                                                                                  |                                  |                                   |            |                                                                                                                                                                                                                               |
| EPI_ISL_418990                                                                                                                                                                                                                                                                                                                                                   | hCoV-19/Hangzhou/ZJU-010/2020    | Asia / China / Hangzhou           | 2020-02-03 | State Key Laboratory for Diagnosis and Treatment of Infectious Diseases, National Clinical Research Center for Infectious Diseases, First Affiliated Hospital, Zhejiang University School of Medicine, Hangzhou, China 310003 |
| State Key Laboratory for Diagnosis and Treatment of Infectious Diseases, National Clinical Research Center for Infectious Diseases, First Affiliated Hospital, Zhejiang University School of Medicine, Hangzhou, China 310003                                                                                                                                    |                                  |                                   |            |                                                                                                                                                                                                                               |
| Hangping Yao, Nanping Wu, Chao Jiang, Xiangyun Lu, Linfang Cheng, Fumin Liu, Zhigang Wu, Haibo Wu, Changzhong Jin, Min Zheng, Lanjuan Li                                                                                                                                                                                                                         |                                  |                                   |            |                                                                                                                                                                                                                               |
| EPI_ISL_418991                                                                                                                                                                                                                                                                                                                                                   | hCoV-19/Hangzhou/ZJU-011/2020    | Asia / China / Hangzhou           | 2020-02-04 | State Key Laboratory for Diagnosis and Treatment of Infectious Diseases, National Clinical Research Center for Infectious Diseases, First Affiliated Hospital, Zhejiang University School of Medicine, Hangzhou, China 310003 |
| State Key Laboratory for Diagnosis and Treatment of Infectious Diseases, National Clinical Research Center for Infectious Diseases, First Affiliated Hospital, Zhejiang University School of Medicine, Hangzhou, China 310003                                                                                                                                    |                                  |                                   |            |                                                                                                                                                                                                                               |
| Hangping Yao, Nanping Wu, Chao Jiang, Xiangyun Lu, Linfang Cheng, Fumin Liu, Zhigang Wu, Haibo Wu, Changzhong Jin, Min Zheng, Lanjuan Li                                                                                                                                                                                                                         |                                  |                                   |            |                                                                                                                                                                                                                               |
| EPI_ISL_418992                                                                                                                                                                                                                                                                                                                                                   | hCoV-19/Singapore/17/2020        | Asia / Singapore                  | 2020-02-10 | National Public Health Laboratory, National Centre for Infectious Diseases                                                                                                                                                    |
| National Public Health Laboratory, National Centre for Infectious Diseases Mak TM, Octavia S, Cui L, Lin RTP                                                                                                                                                                                                                                                     |                                  |                                   |            |                                                                                                                                                                                                                               |
| EPI_ISL_418993                                                                                                                                                                                                                                                                                                                                                   | hCoV-19/Singapore/20/2020        | Asia / Singapore                  | 2020-01-29 | National Public Health Laboratory, National Centre for Infectious Diseases                                                                                                                                                    |
| National Public Health Laboratory, National Centre for Infectious Diseases Mak TM, Octavia S, Cui L, Lin RTP                                                                                                                                                                                                                                                     |                                  |                                   |            |                                                                                                                                                                                                                               |
| EPI_ISL_418994                                                                                                                                                                                                                                                                                                                                                   | hCoV-19/Singapore/3Clin/2020     | Asia / Singapore                  | 2020-01-29 | National Public Health Laboratory, National Centre for Infectious Diseases                                                                                                                                                    |
| National Public Health Laboratory, National Centre for Infectious Diseases Mak TM, Octavia S, Cui L, Lin RTP                                                                                                                                                                                                                                                     |                                  |                                   |            |                                                                                                                                                                                                                               |
| EPI_ISL_418995                                                                                                                                                                                                                                                                                                                                                   | hCoV-19/Singapore/12Clin/2020    | Asia / Singapore                  | 2020-02-28 | National Public Health Laboratory, National Centre for Infectious Diseases                                                                                                                                                    |
| National Public Health Laboratory, National Centre for Infectious Diseases Mak TM, Octavia S, Cui L, Lin RTP                                                                                                                                                                                                                                                     |                                  |                                   |            |                                                                                                                                                                                                                               |
| EPI_ISL_418996                                                                                                                                                                                                                                                                                                                                                   | hCoV-19/Singapore/15/2020        | Asia / Singapore                  | 2020-01-27 | National Public Health Laboratory, National Centre for Infectious Diseases                                                                                                                                                    |
| National Public Health Laboratory, National Centre for Infectious Diseases Mak TM, Octavia S, Cui L, Lin RTP                                                                                                                                                                                                                                                     |                                  |                                   |            |                                                                                                                                                                                                                               |
| EPI_ISL_418997                                                                                                                                                                                                                                                                                                                                                   | hCoV-19/Singapore/16/2020        | Asia / Singapore                  | 2020-02-06 | National Public Health Laboratory, National Centre for Infectious Diseases                                                                                                                                                    |
| National Public Health Laboratory, National Centre for Infectious Diseases Mak TM, Octavia S, Cui L, Lin RTP                                                                                                                                                                                                                                                     |                                  |                                   |            |                                                                                                                                                                                                                               |
| EPI_ISL_418998                                                                                                                                                                                                                                                                                                                                                   | hCoV-19/Singapore/14Clin/2020    | Asia / Singapore                  | 2020-02-14 | National Public Health Laboratory, National Centre for Infectious Diseases                                                                                                                                                    |
| National Public Health Laboratory, National Centre for Infectious Diseases Mak TM, Octavia S, Cui L, Lin RTP                                                                                                                                                                                                                                                     |                                  |                                   |            |                                                                                                                                                                                                                               |
| EPI_ISL_418999                                                                                                                                                                                                                                                                                                                                                   | hCoV-19/Singapore/18/2020        | Asia / Singapore                  | 2020-03-01 | National Public Health Laboratory, National Centre for Infectious Diseases                                                                                                                                                    |
| National Public Health Laboratory, National Centre for Infectious Diseases Mak TM, Octavia S, Cui L, Lin RTP                                                                                                                                                                                                                                                     |                                  |                                   |            |                                                                                                                                                                                                                               |
| EPI_ISL_422001                                                                                                                                                                                                                                                                                                                                                   | hCoV-19/England/20148004904/2020 | Europe / United Kingdom / England | 2020-04-03 | Respiratory Virus Unit, Microbiology Services Colindale, Public Health England                                                                                                                                                |
| Respiratory Virus Unit, Microbiology Services Colindale, Public Health England Respiratory Virus Unit, Microbiology Services Colindale, Public Health England Monica Galiano, Shahjahan Miah, Angie Lackenby, Omolola Akinbami, Tiina Talts, Leena Bhaw, Richard Myers, Steven Platt, Kirstin Edwards, Jonathan Hubb, Joanna Ellis, Maria Zambon                 |                                  |                                   |            |                                                                                                                                                                                                                               |
| EPI_ISL_422002                                                                                                                                                                                                                                                                                                                                                   | hCoV-19/England/20148006104/2020 | Europe / United Kingdom / England | 2020-03-30 | Respiratory Virus Unit, Microbiology Services Colindale, Public Health England                                                                                                                                                |
| Respiratory Virus Unit, Microbiology Services Colindale, Public Health England Respiratory Virus Unit, Microbiology Services Colindale, Public Health England Monica Galiano, Shahjahan Miah, Angie Lackenby, Omolola Akinbami, Tiina Talts, Leena Bhaw, Richard Myers, Steven Platt, Kirstin Edwards, Jonathan Hubb, Joanna Ellis, Maria Zambon                 |                                  |                                   |            |                                                                                                                                                                                                                               |
| EPI_ISL_422009                                                                                                                                                                                                                                                                                                                                                   | hCoV-19/England/20148039404/2020 | Europe / United Kingdom / England | 2020-04-02 | Respiratory Virus Unit, Microbiology Services Colindale, Public Health England                                                                                                                                                |
| Respiratory Virus Unit, Microbiology Services Colindale, Public Health England Respiratory Virus Unit, Microbiology Services Colindale, Public Health England Monica Galiano, Shahjahan Miah, Angie Lackenby, Omolola Akinbami, Tiina Talts, Leena Bhaw, Richard Myers, Steven Platt, Kirstin Edwards, Jonathan Hubb, Joanna Ellis, Maria Zambon                 |                                  |                                   |            |                                                                                                                                                                                                                               |
| EPI_ISL_422010                                                                                                                                                                                                                                                                                                                                                   | hCoV-19/England/20148041604/2020 | Europe / United Kingdom / England | 2020-04-02 | Respiratory Virus Unit, Microbiology Services Colindale, Public Health England                                                                                                                                                |
| Respiratory Virus Unit, Microbiology Services Colindale, Public Health England Respiratory Virus Unit, Microbiology Services Colindale, Public Health England Monica Galiano, Shahjahan Miah, Angie Lackenby, Omolola Akinbami, Tiina Talts, Leena Bhaw, Richard Myers, Steven Platt, Kirstin Edwards, Jonathan Hubb, Joanna Ellis, Maria Zambon                 |                                  |                                   |            |                                                                                                                                                                                                                               |
| EPI_ISL_422016                                                                                                                                                                                                                                                                                                                                                   | hCoV-19/Wales/PHWC-26796/2020    | Europe / United Kingdom / Wales   | 2020-03-28 | Wales Specialist Virology Centre                                                                                                                                                                                              |
| Public Health Wales Microbiology Cardiff Catherine Moore, Johnathan Evans, Malorie Perry, Simon Cottrell, Alec Birchley, Alexander Adams, Amy Gaskin, Bree Gatica-Wilcox, Jason Coombes, Lauren Gilbert, Lee Graham, Nicole Pacchiarini, Sara Kumziene-Summerhayes, Sarah Taylor, Sophie Jones, Sara Rey, Matthew Bull, Joanne Watkins, Sally Corden, Tom Connor |                                  |                                   |            |                                                                                                                                                                                                                               |
| EPI_ISL_422017                                                                                                                                                                                                                                                                                                                                                   | hCoV-19/Wales/PHWC-2711F/2020    | Europe / United Kingdom / Wales   | 2020-03-29 | Wales Specialist Virology Centre                                                                                                                                                                                              |
| Public Health Wales Microbiology Cardiff Catherine Moore, Johnathan Evans, Malorie Perry, Simon Cottrell, Alec Birchley, Alexander Adams, Amy Gaskin, Bree Gatica-Wilcox, Jason Coombes, Lauren Gilbert, Lee Graham, Nicole Pacchiarini, Sara Kumziene-Summerhayes, Sarah Taylor, Sophie Jones,                                                                  |                                  |                                   |            |                                                                                                                                                                                                                               |

















Sara Rey, Matthew Bull, Joanne Watkins, Sally Corden, Tom Connor  
EPI\_ISL\_422178 hCoV-19/Wales/PHWC-26D67/2020 Europe / United Kingdom / Wales 2020-03-30 Wales  
Specialist Virology Centre Public Health Wales Microbiology Cardiff Catherine Moore, Johnathan  
Evans, Malorie Perry, Simon Cottrell, Alec Birchley, Alexander Adams, Amy Gaskin, Bree Gatica-Wilcox, Jason  
Coombes, Lauren Gilbert, Lee Graham, Nicole Pacchiarini, Sara Kumziene-Summerhayes, Sarah Taylor, Sophie Jones,  
Sara Rey, Matthew Bull, Joanne Watkins, Sally Corden, Tom Connor  
EPI\_ISL\_422179 hCoV-19/Wales/PHWC-262A4/2020 Europe / United Kingdom / Wales 2020-03-27 Wales  
Specialist Virology Centre Public Health Wales Microbiology Cardiff Catherine Moore, Johnathan  
Evans, Malorie Perry, Simon Cottrell, Alec Birchley, Alexander Adams, Amy Gaskin, Bree Gatica-Wilcox, Jason  
Coombes, Lauren Gilbert, Lee Graham, Nicole Pacchiarini, Sara Kumziene-Summerhayes, Sarah Taylor, Sophie Jones,  
Sara Rey, Matthew Bull, Joanne Watkins, Sally Corden, Tom Connor  
EPI\_ISL\_422180 hCoV-19/Wales/PHWC-25B7D/2020 Europe / United Kingdom / Wales 2020-03-25 Wales  
Specialist Virology Centre Public Health Wales Microbiology Cardiff Catherine Moore, Johnathan  
Evans, Malorie Perry, Simon Cottrell, Alec Birchley, Alexander Adams, Amy Gaskin, Bree Gatica-Wilcox, Jason  
Coombes, Lauren Gilbert, Lee Graham, Nicole Pacchiarini, Sara Kumziene-Summerhayes, Sarah Taylor, Sophie Jones,  
Sara Rey, Matthew Bull, Joanne Watkins, Sally Corden, Tom Connor  
EPI\_ISL\_422181 hCoV-19/Wales/PHWC-261F2/2020 Europe / United Kingdom / Wales 2020-03-26 Wales  
Specialist Virology Centre Public Health Wales Microbiology Cardiff Catherine Moore, Johnathan  
Evans, Malorie Perry, Simon Cottrell, Alec Birchley, Alexander Adams, Amy Gaskin, Bree Gatica-Wilcox, Jason  
Coombes, Lauren Gilbert, Lee Graham, Nicole Pacchiarini, Sara Kumziene-Summerhayes, Sarah Taylor, Sophie Jones,  
Sara Rey, Matthew Bull, Joanne Watkins, Sally Corden, Tom Connor  
EPI\_ISL\_422182 hCoV-19/Wales/PHWC-267D2/2020 Europe / United Kingdom / Wales 2020-03-25 Wales  
Specialist Virology Centre Public Health Wales Microbiology Cardiff Catherine Moore, Johnathan  
Evans, Malorie Perry, Simon Cottrell, Alec Birchley, Alexander Adams, Amy Gaskin, Bree Gatica-Wilcox, Jason  
Coombes, Lauren Gilbert, Lee Graham, Nicole Pacchiarini, Sara Kumziene-Summerhayes, Sarah Taylor, Sophie Jones,  
Sara Rey, Matthew Bull, Joanne Watkins, Sally Corden, Tom Connor  
EPI\_ISL\_422183 hCoV-19/Wales/PHWC-25B5F/2020 Europe / United Kingdom / Wales 2020-03-24 Wales  
Specialist Virology Centre Public Health Wales Microbiology Cardiff Catherine Moore, Johnathan  
Evans, Malorie Perry, Simon Cottrell, Alec Birchley, Alexander Adams, Amy Gaskin, Bree Gatica-Wilcox, Jason  
Coombes, Lauren Gilbert, Lee Graham, Nicole Pacchiarini, Sara Kumziene-Summerhayes, Sarah Taylor, Sophie Jones,  
Sara Rey, Matthew Bull, Joanne Watkins, Sally Corden, Tom Connor  
EPI\_ISL\_422184 hCoV-19/Wales/PHWC-26875/2020 Europe / United Kingdom / Wales 2020-03-27 Wales  
Specialist Virology Centre Public Health Wales Microbiology Cardiff Catherine Moore, Johnathan  
Evans, Malorie Perry, Simon Cottrell, Alec Birchley, Alexander Adams, Amy Gaskin, Bree Gatica-Wilcox, Jason  
Coombes, Lauren Gilbert, Lee Graham, Nicole Pacchiarini, Sara Kumziene-Summerhayes, Sarah Taylor, Sophie Jones,  
Sara Rey, Matthew Bull, Joanne Watkins, Sally Corden, Tom Connor  
EPI\_ISL\_422185 hCoV-19/Wales/PHWC-2680C/2020 Europe / United Kingdom / Wales 2020-03-26 Wales  
Specialist Virology Centre Public Health Wales Microbiology Cardiff Catherine Moore, Johnathan  
Evans, Malorie Perry, Simon Cottrell, Alec Birchley, Alexander Adams, Amy Gaskin, Bree Gatica-Wilcox, Jason  
Coombes, Lauren Gilbert, Lee Graham, Nicole Pacchiarini, Sara Kumziene-Summerhayes, Sarah Taylor, Sophie Jones,  
Sara Rey, Matthew Bull, Joanne Watkins, Sally Corden, Tom Connor  
EPI\_ISL\_422186 hCoV-19/Wales/PHWC-26B4F/2020 Europe / United Kingdom / Wales 2020-03-29 Wales  
Specialist Virology Centre Public Health Wales Microbiology Cardiff Catherine Moore, Johnathan  
Evans, Malorie Perry, Simon Cottrell, Alec Birchley, Alexander Adams, Amy Gaskin, Bree Gatica-Wilcox, Jason  
Coombes, Lauren Gilbert, Lee Graham, Nicole Pacchiarini, Sara Kumziene-Summerhayes, Sarah Taylor, Sophie Jones,  
Sara Rey, Matthew Bull, Joanne Watkins, Sally Corden, Tom Connor  
EPI\_ISL\_422187 hCoV-19/Wales/PHWC-2709A/2020 Europe / United Kingdom / Wales 2020-03-29 Wales  
Specialist Virology Centre Public Health Wales Microbiology Cardiff Catherine Moore, Johnathan  
Evans, Malorie Perry, Simon Cottrell, Alec Birchley, Alexander Adams, Amy Gaskin, Bree Gatica-Wilcox, Jason  
Coombes, Lauren Gilbert, Lee Graham, Nicole Pacchiarini, Sara Kumziene-Summerhayes, Sarah Taylor, Sophie Jones,  
Sara Rey, Matthew Bull, Joanne Watkins, Sally Corden, Tom Connor  
EPI\_ISL\_423321 hCoV-19/England/20138063804/2020 Europe / United Kingdom / England 2020-03-26  
Respiratory Virus Unit, Microbiology Services Colindale, Public Health England Respiratory Virus Unit,  
Microbiology Services Colindale, Public Health England Monica Galiano, Shahjahan Miah, Angie Lackenby, Omolola  
Akinbami, Tiina Talts, Leena Bhaw, Richard Myers, Steven Platt, Kirstin Edwards, Jonathan Hubb, Joanna Ellis,  
Maria Zambon  
EPI\_ISL\_423324 hCoV-19/England/20138078204/2020 Europe / United Kingdom / England 2020-03-26  
Respiratory Virus Unit, Microbiology Services Colindale, Public Health England Respiratory Virus Unit,  
Microbiology Services Colindale, Public Health England Monica Galiano, Shahjahan Miah, Angie Lackenby, Omolola  
Akinbami, Tiina Talts, Leena Bhaw, Richard Myers, Steven Platt, Kirstin Edwards, Jonathan Hubb, Joanna Ellis,  
Maria Zambon  
EPI\_ISL\_423328 hCoV-19/England/20138084904/2020 Europe / United Kingdom / England 2020-03-27  
Respiratory Virus Unit, Microbiology Services Colindale, Public Health England Respiratory Virus Unit,  
Microbiology Services Colindale, Public Health England Monica Galiano, Shahjahan Miah, Angie Lackenby, Omolola  
Akinbami, Tiina Talts, Leena Bhaw, Richard Myers, Steven Platt, Kirstin Edwards, Jonathan Hubb, Joanna Ellis,  
Maria Zambon  
EPI\_ISL\_423337 hCoV-19/England/20139002204/2020 Europe / United Kingdom / England 2020-03-27  
Respiratory Virus Unit, Microbiology Services Colindale, Public Health England Respiratory Virus Unit,  
Microbiology Services Colindale, Public Health England Monica Galiano, Shahjahan Miah, Angie Lackenby, Omolola  
Akinbami, Tiina Talts, Leena Bhaw, Richard Myers, Steven Platt, Kirstin Edwards, Jonathan Hubb, Joanna Ellis,

















Maria Zambon  
 EPI\_ISL\_423507 hCoV-19/England/20144012404/2020 Europe / United Kingdom / England 2020-03-30  
 Respiratory Virus Unit, Microbiology Services Colindale, Public Health England Respiratory Virus Unit,  
 Microbiology Services Colindale, Public Health England Monica Galiano, Shahjahan Miah, Angie Lackenby, Omolola  
 Akinbami, Tiina Talts, Leena Bhaw, Richard Myers, Steven Platt, Kirstin Edwards, Jonathan Hubb, Joanna Ellis,  
 Maria Zambon

EPI\_ISL\_423508 hCoV-19/England/20144013704/2020 Europe / United Kingdom / England 2020-03-31  
 Respiratory Virus Unit, Microbiology Services Colindale, Public Health England Respiratory Virus Unit,  
 Microbiology Services Colindale, Public Health England Monica Galiano, Shahjahan Miah, Angie Lackenby, Omolola  
 Akinbami, Tiina Talts, Leena Bhaw, Richard Myers, Steven Platt, Kirstin Edwards, Jonathan Hubb, Joanna Ellis,  
 Maria Zambon

EPI\_ISL\_423509 hCoV-19/England/20144014504/2020 Europe / United Kingdom / England 2020-03-31  
 Respiratory Virus Unit, Microbiology Services Colindale, Public Health England Respiratory Virus Unit,  
 Microbiology Services Colindale, Public Health England Monica Galiano, Shahjahan Miah, Angie Lackenby, Omolola  
 Akinbami, Tiina Talts, Leena Bhaw, Richard Myers, Steven Platt, Kirstin Edwards, Jonathan Hubb, Joanna Ellis,  
 Maria Zambon

EPI\_ISL\_423512 hCoV-19/England/20144018904/2020 Europe / United Kingdom / England 2020-03-31  
 Respiratory Virus Unit, Microbiology Services Colindale, Public Health England Respiratory Virus Unit,  
 Microbiology Services Colindale, Public Health England Monica Galiano, Shahjahan Miah, Angie Lackenby, Omolola  
 Akinbami, Tiina Talts, Leena Bhaw, Richard Myers, Steven Platt, Kirstin Edwards, Jonathan Hubb, Joanna Ellis,  
 Maria Zambon

EPI\_ISL\_424613 hCoV-19/Iceland/593/2020 Europe / Iceland / Reykjavik 2020-03-27 The National  
 University Hospital of Iceland deCODE genetics Daniel F Gudbjartsson; Agnar Helgason; Hakon Jonsson; Olafur T  
 Magnusson; Pall Melsted; Gudmundur L Norddahl; Jona Saemundsdottir; Asgeir Sigurdsson; Patrick Sulem; Arna B  
 Agustsdottir; Berglind Eiriksdottir; Run Fridriksdottir; Elisabet E Gardarsdottir; Gudmundur Georgsson; Olafia  
 S Gretarsdottir; Kjartan R Gudmundsson; Thora R Gunnarsdottir; Arnaldur Gylfason; Hilma Holm; Brynjar O  
 Jenson; Aslaug Jonasdottir; Kamilla S Josefsdottir; Thordur Kristjansson; Droplaug N Magnusdottir; Louise le  
 Roux; Gudrun Sigmundsdottir; Gardar Sveinbjornsson; Kristin E Sveinsdottir; Maney Sveinsdottir; Emil A  
 Thorarensen; Bjarni Thorbjornsson; Gisli Masson; Ingileif Jonsdottir; Alma Moller; Thorolfur Gudnason; Karl G  
 Kristinsson; Unnur Thorsteinsdottir; Kari Stefansson

EPI\_ISL\_424614 hCoV-19/Iceland/594/2020 Europe / Iceland / Reykjavik 2020-03-27 The National  
 University Hospital of Iceland deCODE genetics Daniel F Gudbjartsson; Agnar Helgason; Hakon Jonsson; Olafur T  
 Magnusson; Pall Melsted; Gudmundur L Norddahl; Jona Saemundsdottir; Asgeir Sigurdsson; Patrick Sulem; Arna B  
 Agustsdottir; Berglind Eiriksdottir; Run Fridriksdottir; Elisabet E Gardarsdottir; Gudmundur Georgsson; Olafia  
 S Gretarsdottir; Kjartan R Gudmundsson; Thora R Gunnarsdottir; Arnaldur Gylfason; Hilma Holm; Brynjar O  
 Jenson; Aslaug Jonasdottir; Kamilla S Josefsdottir; Thordur Kristjansson; Droplaug N Magnusdottir; Louise le  
 Roux; Gudrun Sigmundsdottir; Gardar Sveinbjornsson; Kristin E Sveinsdottir; Maney Sveinsdottir; Emil A  
 Thorarensen; Bjarni Thorbjornsson; Gisli Masson; Ingileif Jonsdottir; Alma Moller; Thorolfur Gudnason; Karl G  
 Kristinsson; Unnur Thorsteinsdottir; Kari Stefansson

EPI\_ISL\_424615 hCoV-19/Iceland/595/2020 Europe / Iceland / Reykjavik 2020-03-27 The National  
 University Hospital of Iceland deCODE genetics Daniel F Gudbjartsson; Agnar Helgason; Hakon Jonsson; Olafur T  
 Magnusson; Pall Melsted; Gudmundur L Norddahl; Jona Saemundsdottir; Asgeir Sigurdsson; Patrick Sulem; Arna B  
 Agustsdottir; Berglind Eiriksdottir; Run Fridriksdottir; Elisabet E Gardarsdottir; Gudmundur Georgsson; Olafia  
 S Gretarsdottir; Kjartan R Gudmundsson; Thora R Gunnarsdottir; Arnaldur Gylfason; Hilma Holm; Brynjar O  
 Jenson; Aslaug Jonasdottir; Kamilla S Josefsdottir; Thordur Kristjansson; Droplaug N Magnusdottir; Louise le  
 Roux; Gudrun Sigmundsdottir; Gardar Sveinbjornsson; Kristin E Sveinsdottir; Maney Sveinsdottir; Emil A  
 Thorarensen; Bjarni Thorbjornsson; Gisli Masson; Ingileif Jonsdottir; Alma Moller; Thorolfur Gudnason; Karl G  
 Kristinsson; Unnur Thorsteinsdottir; Kari Stefansson

EPI\_ISL\_424616 hCoV-19/Iceland/596/2020 Europe / Iceland / Reykjavik 2020-03-28 The National  
 University Hospital of Iceland deCODE genetics Daniel F Gudbjartsson; Agnar Helgason; Hakon Jonsson; Olafur T  
 Magnusson; Pall Melsted; Gudmundur L Norddahl; Jona Saemundsdottir; Asgeir Sigurdsson; Patrick Sulem; Arna B  
 Agustsdottir; Berglind Eiriksdottir; Run Fridriksdottir; Elisabet E Gardarsdottir; Gudmundur Georgsson; Olafia  
 S Gretarsdottir; Kjartan R Gudmundsson; Thora R Gunnarsdottir; Arnaldur Gylfason; Hilma Holm; Brynjar O  
 Jenson; Aslaug Jonasdottir; Kamilla S Josefsdottir; Thordur Kristjansson; Droplaug N Magnusdottir; Louise le  
 Roux; Gudrun Sigmundsdottir; Gardar Sveinbjornsson; Kristin E Sveinsdottir; Maney Sveinsdottir; Emil A  
 Thorarensen; Bjarni Thorbjornsson; Gisli Masson; Ingileif Jonsdottir; Alma Moller; Thorolfur Gudnason; Karl G  
 Kristinsson; Unnur Thorsteinsdottir; Kari Stefansson

EPI\_ISL\_424617 hCoV-19/Iceland/597/2020 Europe / Iceland / Reykjavik 2020-03-28 The National  
 University Hospital of Iceland deCODE genetics Daniel F Gudbjartsson; Agnar Helgason; Hakon Jonsson; Olafur T  
 Magnusson; Pall Melsted; Gudmundur L Norddahl; Jona Saemundsdottir; Asgeir Sigurdsson; Patrick Sulem; Arna B  
 Agustsdottir; Berglind Eiriksdottir; Run Fridriksdottir; Elisabet E Gardarsdottir; Gudmundur Georgsson; Olafia  
 S Gretarsdottir; Kjartan R Gudmundsson; Thora R Gunnarsdottir; Arnaldur Gylfason; Hilma Holm; Brynjar O  
 Jenson; Aslaug Jonasdottir; Kamilla S Josefsdottir; Thordur Kristjansson; Droplaug N Magnusdottir; Louise le  
 Roux; Gudrun Sigmundsdottir; Gardar Sveinbjornsson; Kristin E Sveinsdottir; Maney Sveinsdottir; Emil A  
 Thorarensen; Bjarni Thorbjornsson; Gisli Masson; Ingileif Jonsdottir; Alma Moller; Thorolfur Gudnason; Karl G  
 Kristinsson; Unnur Thorsteinsdottir; Kari Stefansson

EPI\_ISL\_424619 hCoV-19/Iceland/599/2020 Europe / Iceland / Reykjavik 2020-03-28 The National  
 University Hospital of Iceland deCODE genetics Daniel F Gudbjartsson; Agnar Helgason; Hakon Jonsson; Olafur T  
 Magnusson; Pall Melsted; Gudmundur L Norddahl; Jona Saemundsdottir; Asgeir Sigurdsson; Patrick Sulem; Arna B  
 Agustsdottir; Berglind Eiriksdottir; Run Fridriksdottir; Elisabet E Gardarsdottir; Gudmundur Georgsson; Olafia



S Gretarsdottir; Kjartan R Gudmundsson; Thora R Gunnarsdottir; Arnaldur Gylfason; Hilma Holm; Brynjar O Jensson; Aslaug Jonasdottir; Kamilla S Josefsdottir; Thordur Kristjansson; Droplaug N Magnusdottir; Louise le Roux; Gudrun Sigmundsdottir; Gardar Sveinbjornsson; Kristin E Sveinsdottir; Maney Sveinsdottir; Emil A Thorarensen; Bjarni Thorbjornsson; Gisli Masson; Ingileif Jonsdottir; Alma Moller; Thorolfur Gudnason; Karl G Kristinsson; Unnur Thorsteinsdottir; Kari Stefansson

EPI\_ISL\_424621 hCoV-19/Iceland/601/2020 Europe / Iceland / Reykjavik 2020-03-28 The National University Hospital of Iceland deCODE genetics Daniel F Gudbjartsson; Agnar Helgason; Hakon Jonsson; Olafur T Magnusson; Pall Melsted; Gudmundur L Norddahl; Jona Saemundsdottir; Asgeir Sigurdsson; Patrick Sulem; Arna B Agustsdottir; Berglind Eiriksdoottir; Run Fridriksdottir; Elisabet E Gardarsdottir; Gudmundur Georgsson; Olafia S Gretarsdottir; Kjartan R Gudmundsson; Thora R Gunnarsdottir; Arnaldur Gylfason; Hilma Holm; Brynjar O Jensson; Aslaug Jonasdottir; Kamilla S Josefsdottir; Thordur Kristjansson; Droplaug N Magnusdottir; Louise le Roux; Gudrun Sigmundsdottir; Gardar Sveinbjornsson; Kristin E Sveinsdottir; Maney Sveinsdottir; Emil A Thorarensen; Bjarni Thorbjornsson; Gisli Masson; Ingileif Jonsdottir; Alma Moller; Thorolfur Gudnason; Karl G Kristinsson; Unnur Thorsteinsdottir; Kari Stefansson

EPI\_ISL\_424622 hCoV-19/Iceland/602/2020 Europe / Iceland / Reykjavik 2020-03-28 The National University Hospital of Iceland deCODE genetics Daniel F Gudbjartsson; Agnar Helgason; Hakon Jonsson; Olafur T Magnusson; Pall Melsted; Gudmundur L Norddahl; Jona Saemundsdottir; Asgeir Sigurdsson; Patrick Sulem; Arna B Agustsdottir; Berglind Eiriksdoottir; Run Fridriksdottir; Elisabet E Gardarsdottir; Gudmundur Georgsson; Olafia S Gretarsdottir; Kjartan R Gudmundsson; Thora R Gunnarsdottir; Arnaldur Gylfason; Hilma Holm; Brynjar O Jensson; Aslaug Jonasdottir; Kamilla S Josefsdottir; Thordur Kristjansson; Droplaug N Magnusdottir; Louise le Roux; Gudrun Sigmundsdottir; Gardar Sveinbjornsson; Kristin E Sveinsdottir; Maney Sveinsdottir; Emil A Thorarensen; Bjarni Thorbjornsson; Gisli Masson; Ingileif Jonsdottir; Alma Moller; Thorolfur Gudnason; Karl G Kristinsson; Unnur Thorsteinsdottir; Kari Stefansson

EPI\_ISL\_424624 hCoV-19/Iceland/604/2020 Europe / Iceland / Reykjavik 2020-03-28 The National University Hospital of Iceland deCODE genetics Daniel F Gudbjartsson; Agnar Helgason; Hakon Jonsson; Olafur T Magnusson; Pall Melsted; Gudmundur L Norddahl; Jona Saemundsdottir; Asgeir Sigurdsson; Patrick Sulem; Arna B Agustsdottir; Berglind Eiriksdoottir; Run Fridriksdottir; Elisabet E Gardarsdottir; Gudmundur Georgsson; Olafia S Gretarsdottir; Kjartan R Gudmundsson; Thora R Gunnarsdottir; Arnaldur Gylfason; Hilma Holm; Brynjar O Jensson; Aslaug Jonasdottir; Kamilla S Josefsdottir; Thordur Kristjansson; Droplaug N Magnusdottir; Louise le Roux; Gudrun Sigmundsdottir; Gardar Sveinbjornsson; Kristin E Sveinsdottir; Maney Sveinsdottir; Emil A Thorarensen; Bjarni Thorbjornsson; Gisli Masson; Ingileif Jonsdottir; Alma Moller; Thorolfur Gudnason; Karl G Kristinsson; Unnur Thorsteinsdottir; Kari Stefansson

EPI\_ISL\_424626 hCoV-19/Mexico/CDMX-INER\_04/2020 North America / Mexico / Mexico City 2020-03-15 Instituto Nacional de Enfermedades Respiratorias Instituto Nacional de Enfermedades Respiratorias Joel Armando Vázquez Pérez, Celia Boukadida, Santiago Avila Ríos, Mario Mújica Sánchez, José Arturo Martínez Orozco, Eduardo Becerril Vargas, Jorge Salas Hernández, Irma López Martínez, Lucia Hernández Rivas, Gisela Barrera Badillo, Edgar Mendieta Condado, Fabiola Garcés Ayala, Adnan Araiza Rodríguez, José Ernesto Ramírez González, Victor Hugo Borja Aburto, Concepción Grajales Muñiz, Cesar Raúl González Bonilla, Carolina González Torres, Francisco Javier Gaytán Cervantes, José Esteban Muñoz Medina, Guillermo M. Ruiz-Palacios, Pilar Ramos Cervantes, Violeta Ibarra Gonzalez, Fernando Ledesma Barrientos, Luis Alberto García Andrade, Alfredo Ponce de León Garduño, Blanca Taboada, Alejandro Sánchez, Pavel Isa, Ricardo Grande, Gloria Vázquez, Francisco Pulido, Carlos F. Arias.

EPI\_ISL\_424627 hCoV-19/Mexico/CDMX-INER\_05/2020 North America / Mexico / Mexico City 2020-03-16 Instituto Nacional de Enfermedades Respiratorias Instituto Nacional de Enfermedades Respiratorias Joel Armando Vázquez Pérez, Celia Boukadida, Santiago Avila Ríos, Mario Mújica Sánchez, José Arturo Martínez Orozco, Eduardo Becerril Vargas, Jorge Salas Hernández, Irma López Martínez, Lucia Hernández Rivas, Gisela Barrera Badillo, Edgar Mendieta Condado, Fabiola Garcés Ayala, Adnan Araiza Rodríguez, José Ernesto Ramírez González, Victor Hugo Borja Aburto, Concepción Grajales Muñiz, Cesar Raúl González Bonilla, Carolina González Torres, Francisco Javier Gaytán Cervantes, José Esteban Muñoz Medina, Guillermo M. Ruiz-Palacios, Pilar Ramos Cervantes, Violeta Ibarra Gonzalez, Fernando Ledesma Barrientos, Luis Alberto García Andrade, Alfredo Ponce de León Garduño, Blanca Taboada, Alejandro Sánchez, Pavel Isa, Ricardo Grande, Gloria Vázquez, Francisco Pulido, Carlos F. Arias.

EPI\_ISL\_424629 hCoV-19/Belgium/ULG-10066/2020 Europe / Belgium / Liège 2020-04-03 Department of Clinical Microbiology GIGA Medical Genomics Keith Durkin, Maria Artesi, Sébastien Bontems, Raphaël Boreux, Cécile Meex, Pierrette Melin, Marie-Pierre Hayette, Vincent Bours.

EPI\_ISL\_424630 hCoV-19/Belgium/ULG-10067/2020 Europe / Belgium / Liège 2020-04-03 Department of Clinical Microbiology GIGA Medical Genomics Keith Durkin, Maria Artesi, Sébastien Bontems, Raphaël Boreux, Cécile Meex, Pierrette Melin, Marie-Pierre Hayette, Vincent Bours.

EPI\_ISL\_424631 hCoV-19/Belgium/ULG-10072/2020 Europe / Belgium / Liège 2020-04-03 Department of Clinical Microbiology GIGA Medical Genomics Keith Durkin, Maria Artesi, Sébastien Bontems, Raphaël Boreux, Cécile Meex, Pierrette Melin, Marie-Pierre Hayette, Vincent Bours.

EPI\_ISL\_424633 hCoV-19/Belgium/ULG-10069/2020 Europe / Belgium / Liège 2020-04-03 Department of Clinical Microbiology GIGA Medical Genomics Keith Durkin, Maria Artesi, Sébastien Bontems, Raphaël Boreux, Cécile Meex, Pierrette Melin, Marie-Pierre Hayette, Vincent Bours.

EPI\_ISL\_424636 hCoV-19/Belgium/ULG-10068/2020 Europe / Belgium / Liège 2020-04-03 Department of Clinical Microbiology GIGA Medical Genomics Keith Durkin, Maria Artesi, Sébastien Bontems, Raphaël Boreux, Cécile Meex, Pierrette Melin, Marie-Pierre Hayette, Vincent Bours.

EPI\_ISL\_424637 hCoV-19/Belgium/ULG-10078/2020 Europe / Belgium / Liège 2020-04-03 Department of Clinical Microbiology GIGA Medical Genomics Keith Durkin, Maria Artesi, Sébastien Bontems, Raphaël Boreux, Cécile Meex, Pierrette Melin, Marie-Pierre Hayette, Vincent Bours.

|                                                                                                                                                                                                                                                                                                                                                                                                                                                                                                                                                                                                                                                          |                                     |                                           |            |                                     |
|----------------------------------------------------------------------------------------------------------------------------------------------------------------------------------------------------------------------------------------------------------------------------------------------------------------------------------------------------------------------------------------------------------------------------------------------------------------------------------------------------------------------------------------------------------------------------------------------------------------------------------------------------------|-------------------------------------|-------------------------------------------|------------|-------------------------------------|
| EPI_ISL_424640                                                                                                                                                                                                                                                                                                                                                                                                                                                                                                                                                                                                                                           | hCoV-19/Belgium/ULG-10081/2020      | Europe / Belgium / Liège                  | 2020-04-03 | Department of Clinical Microbiology |
| GIGA Medical Genomics Keith Durkin, Maria Artesi, Sébastien Bontems, Raphaël Boreux, Cécile Meex, Pierrette Melin, Marie-Pierre Hayette, Vincent Bours.                                                                                                                                                                                                                                                                                                                                                                                                                                                                                                  |                                     |                                           |            |                                     |
| EPI_ISL_424641                                                                                                                                                                                                                                                                                                                                                                                                                                                                                                                                                                                                                                           | hCoV-19/Belgium/ULG-10080/2020      | Europe / Belgium / Liège                  | 2020-04-03 | Department of Clinical Microbiology |
| GIGA Medical Genomics Keith Durkin, Maria Artesi, Sébastien Bontems, Raphaël Boreux, Cécile Meex, Pierrette Melin, Marie-Pierre Hayette, Vincent Bours.                                                                                                                                                                                                                                                                                                                                                                                                                                                                                                  |                                     |                                           |            |                                     |
| EPI_ISL_424642                                                                                                                                                                                                                                                                                                                                                                                                                                                                                                                                                                                                                                           | hCoV-19/Belgium/ULG-10077/2020      | Europe / Belgium / Liège                  | 2020-04-04 | Department of Clinical Microbiology |
| GIGA Medical Genomics Keith Durkin, Maria Artesi, Sébastien Bontems, Raphaël Boreux, Cécile Meex, Pierrette Melin, Marie-Pierre Hayette, Vincent Bours.                                                                                                                                                                                                                                                                                                                                                                                                                                                                                                  |                                     |                                           |            |                                     |
| EPI_ISL_424643                                                                                                                                                                                                                                                                                                                                                                                                                                                                                                                                                                                                                                           | hCoV-19/Belgium/ULG-10089/2020      | Europe / Belgium / Liège                  | 2020-04-04 | Department of Clinical Microbiology |
| GIGA Medical Genomics Keith Durkin, Maria Artesi, Sébastien Bontems, Raphaël Boreux, Cécile Meex, Pierrette Melin, Marie-Pierre Hayette, Vincent Bours.                                                                                                                                                                                                                                                                                                                                                                                                                                                                                                  |                                     |                                           |            |                                     |
| EPI_ISL_424644                                                                                                                                                                                                                                                                                                                                                                                                                                                                                                                                                                                                                                           | hCoV-19/Belgium/ULG-10086/2020      | Europe / Belgium / Liège                  | 2020-04-04 | Department of Clinical Microbiology |
| GIGA Medical Genomics Keith Durkin, Maria Artesi, Sébastien Bontems, Raphaël Boreux, Cécile Meex, Pierrette Melin, Marie-Pierre Hayette, Vincent Bours.                                                                                                                                                                                                                                                                                                                                                                                                                                                                                                  |                                     |                                           |            |                                     |
| EPI_ISL_424645                                                                                                                                                                                                                                                                                                                                                                                                                                                                                                                                                                                                                                           | hCoV-19/Belgium/ULG-10085/2020      | Europe / Belgium / Liège                  | 2020-04-04 | Department of Clinical Microbiology |
| GIGA Medical Genomics Keith Durkin, Maria Artesi, Sébastien Bontems, Raphaël Boreux, Cécile Meex, Pierrette Melin, Marie-Pierre Hayette, Vincent Bours.                                                                                                                                                                                                                                                                                                                                                                                                                                                                                                  |                                     |                                           |            |                                     |
| EPI_ISL_424646                                                                                                                                                                                                                                                                                                                                                                                                                                                                                                                                                                                                                                           | hCoV-19/Belgium/ULG-10088/2020      | Europe / Belgium / Liège                  | 2020-04-04 | Department of Clinical Microbiology |
| GIGA Medical Genomics Keith Durkin, Maria Artesi, Sébastien Bontems, Raphaël Boreux, Cécile Meex, Pierrette Melin, Marie-Pierre Hayette, Vincent Bours.                                                                                                                                                                                                                                                                                                                                                                                                                                                                                                  |                                     |                                           |            |                                     |
| EPI_ISL_424647                                                                                                                                                                                                                                                                                                                                                                                                                                                                                                                                                                                                                                           | hCoV-19/Belgium/ULG-10092/2020      | Europe / Belgium / Liège                  | 2020-04-04 | Department of Clinical Microbiology |
| GIGA Medical Genomics Keith Durkin, Maria Artesi, Sébastien Bontems, Raphaël Boreux, Cécile Meex, Pierrette Melin, Marie-Pierre Hayette, Vincent Bours.                                                                                                                                                                                                                                                                                                                                                                                                                                                                                                  |                                     |                                           |            |                                     |
| EPI_ISL_424649                                                                                                                                                                                                                                                                                                                                                                                                                                                                                                                                                                                                                                           | hCoV-19/Belgium/ULG-10082/2020      | Europe / Belgium / Liège                  | 2020-04-04 | Department of Clinical Microbiology |
| GIGA Medical Genomics Keith Durkin, Maria Artesi, Sébastien Bontems, Raphaël Boreux, Cécile Meex, Pierrette Melin, Marie-Pierre Hayette, Vincent Bours.                                                                                                                                                                                                                                                                                                                                                                                                                                                                                                  |                                     |                                           |            |                                     |
| EPI_ISL_424650                                                                                                                                                                                                                                                                                                                                                                                                                                                                                                                                                                                                                                           | hCoV-19/Belgium/ULG-10094/2020      | Europe / Belgium / Liège                  | 2020-04-04 | Department of Clinical Microbiology |
| GIGA Medical Genomics Keith Durkin, Maria Artesi, Sébastien Bontems, Raphaël Boreux, Cécile Meex, Pierrette Melin, Marie-Pierre Hayette, Vincent Bours.                                                                                                                                                                                                                                                                                                                                                                                                                                                                                                  |                                     |                                           |            |                                     |
| EPI_ISL_424651                                                                                                                                                                                                                                                                                                                                                                                                                                                                                                                                                                                                                                           | hCoV-19/Belgium/ULG-10095/2020      | Europe / Belgium / Liège                  | 2020-04-05 | Department of Clinical Microbiology |
| GIGA Medical Genomics Keith Durkin, Maria Artesi, Sébastien Bontems, Raphaël Boreux, Cécile Meex, Pierrette Melin, Marie-Pierre Hayette, Vincent Bours.                                                                                                                                                                                                                                                                                                                                                                                                                                                                                                  |                                     |                                           |            |                                     |
| EPI_ISL_424652                                                                                                                                                                                                                                                                                                                                                                                                                                                                                                                                                                                                                                           | hCoV-19/Belgium/ULG-10055/2020      | Europe / Belgium / Liège                  | 2020-04-05 | Department of Clinical Microbiology |
| GIGA Medical Genomics Keith Durkin, Maria Artesi, Sébastien Bontems, Raphaël Boreux, Cécile Meex, Pierrette Melin, Marie-Pierre Hayette, Vincent Bours.                                                                                                                                                                                                                                                                                                                                                                                                                                                                                                  |                                     |                                           |            |                                     |
| EPI_ISL_424653                                                                                                                                                                                                                                                                                                                                                                                                                                                                                                                                                                                                                                           | hCoV-19/Belgium/ULG-10058/2020      | Europe / Belgium / Liège                  | 2020-04-05 | Department of Clinical Microbiology |
| GIGA Medical Genomics Keith Durkin, Maria Artesi, Sébastien Bontems, Raphaël Boreux, Cécile Meex, Pierrette Melin, Marie-Pierre Hayette, Vincent Bours.                                                                                                                                                                                                                                                                                                                                                                                                                                                                                                  |                                     |                                           |            |                                     |
| EPI_ISL_424654                                                                                                                                                                                                                                                                                                                                                                                                                                                                                                                                                                                                                                           | hCoV-19/Belgium/ULG-10057/2020      | Europe / Belgium / Liège                  | 2020-04-05 | Department of Clinical Microbiology |
| GIGA Medical Genomics Keith Durkin, Maria Artesi, Sébastien Bontems, Raphaël Boreux, Cécile Meex, Pierrette Melin, Marie-Pierre Hayette, Vincent Bours.                                                                                                                                                                                                                                                                                                                                                                                                                                                                                                  |                                     |                                           |            |                                     |
| EPI_ISL_424655                                                                                                                                                                                                                                                                                                                                                                                                                                                                                                                                                                                                                                           | hCoV-19/Belgium/ULG-10056/2020      | Europe / Belgium / Liège                  | 2020-04-05 | Department of Clinical Microbiology |
| GIGA Medical Genomics Keith Durkin, Maria Artesi, Sébastien Bontems, Raphaël Boreux, Cécile Meex, Pierrette Melin, Marie-Pierre Hayette, Vincent Bours.                                                                                                                                                                                                                                                                                                                                                                                                                                                                                                  |                                     |                                           |            |                                     |
| EPI_ISL_424657                                                                                                                                                                                                                                                                                                                                                                                                                                                                                                                                                                                                                                           | hCoV-19/Belgium/ULG-10052/2020      | Europe / Belgium / Liège                  | 2020-04-05 | Department of Clinical Microbiology |
| GIGA Medical Genomics Keith Durkin, Maria Artesi, Sébastien Bontems, Raphaël Boreux, Cécile Meex, Pierrette Melin, Marie-Pierre Hayette, Vincent Bours.                                                                                                                                                                                                                                                                                                                                                                                                                                                                                                  |                                     |                                           |            |                                     |
| EPI_ISL_424658                                                                                                                                                                                                                                                                                                                                                                                                                                                                                                                                                                                                                                           | hCoV-19/Belgium/ULG-10049/2020      | Europe / Belgium / Liège                  | 2020-04-05 | Department of Clinical Microbiology |
| GIGA Medical Genomics Keith Durkin, Maria Artesi, Sébastien Bontems, Raphaël Boreux, Cécile Meex, Pierrette Melin, Marie-Pierre Hayette, Vincent Bours.                                                                                                                                                                                                                                                                                                                                                                                                                                                                                                  |                                     |                                           |            |                                     |
| EPI_ISL_424660                                                                                                                                                                                                                                                                                                                                                                                                                                                                                                                                                                                                                                           | hCoV-19/Belgium/ULG-10051/2020      | Europe / Belgium / Liège                  | 2020-04-05 | Department of Clinical Microbiology |
| GIGA Medical Genomics Keith Durkin, Maria Artesi, Sébastien Bontems, Raphaël Boreux, Cécile Meex, Pierrette Melin, Marie-Pierre Hayette, Vincent Bours.                                                                                                                                                                                                                                                                                                                                                                                                                                                                                                  |                                     |                                           |            |                                     |
| EPI_ISL_424661                                                                                                                                                                                                                                                                                                                                                                                                                                                                                                                                                                                                                                           | hCoV-19/Belgium/ULG-10053/2020      | Europe / Belgium / Liège                  | 2020-04-05 | Department of Clinical Microbiology |
| GIGA Medical Genomics Keith Durkin, Maria Artesi, Sébastien Bontems, Raphaël Boreux, Cécile Meex, Pierrette Melin, Marie-Pierre Hayette, Vincent Bours.                                                                                                                                                                                                                                                                                                                                                                                                                                                                                                  |                                     |                                           |            |                                     |
| EPI_ISL_424662                                                                                                                                                                                                                                                                                                                                                                                                                                                                                                                                                                                                                                           | hCoV-19/Belgium/ULG-10061/2020      | Europe / Belgium / Liège                  | 2020-04-05 | Department of Clinical Microbiology |
| GIGA Medical Genomics Keith Durkin, Maria Artesi, Sébastien Bontems, Raphaël Boreux, Cécile Meex, Pierrette Melin, Marie-Pierre Hayette, Vincent Bours.                                                                                                                                                                                                                                                                                                                                                                                                                                                                                                  |                                     |                                           |            |                                     |
| EPI_ISL_424664                                                                                                                                                                                                                                                                                                                                                                                                                                                                                                                                                                                                                                           | hCoV-19/Belgium/ULG-10062/2020      | Europe / Belgium / Liège                  | 2020-04-05 | Department of Clinical Microbiology |
| GIGA Medical Genomics Keith Durkin, Maria Artesi, Sébastien Bontems, Raphaël Boreux, Cécile Meex, Pierrette Melin, Marie-Pierre Hayette, Vincent Bours.                                                                                                                                                                                                                                                                                                                                                                                                                                                                                                  |                                     |                                           |            |                                     |
| EPI_ISL_424667                                                                                                                                                                                                                                                                                                                                                                                                                                                                                                                                                                                                                                           | hCoV-19/Mexico/EdoMex-IndRE_03/2020 | North America / Mexico / Estado de Mexico | 2020-03-04 | Department of Epidemiológicos       |
| Laboratorio Estatal de Salud Publica del Estado de México Instituto de Diagnóstico y Referencia Epidemiológicos Irma López Martínez, José Ernesto Ramírez González, Lucia Hernández Rivas, Gisela Barrera Badillo, Edgar Mendieta Condado, Fabiola Garcés Ayala, Adnan Araiza Rodríguez, Celia Boukadida, Santiago Avila Ríos, Mario Mújica Sánchez, José Arturo Martínez Orozco, Eduardo Becerril Vargas, Joel Armando Vázquez Pérez, Víctor Hugo Borja Aburto, Concepción Grajales Muñiz, Cesar Raúl González Bonilla, Carolina González Torres, Francisco Javier Gaytán Cervantes, José Esteban Muñoz Medina, Guillermo M. Ruiz-Palacios, Pilar Ramos |                                     |                                           |            |                                     |

Cervantes, Violeta Ibarra Gonzalez, Fernando Ledesma Barrientos, Luis Alberto García Andrade, Alfredo Ponce de León Garduño, Blanca Taboada, Alejandro Sánchez, Pavel Isa, Ricardo Grande, Gloria Vázquez, Francisco Pulido, Carlos F. Arias.

EPI\_ISL\_424668 hCoV-19/USA/AZ-ASU2922/2020 North America / USA / Arizona 2020-03-16 Arizona State University Health Services Arizona State University Rabia Maqsood, LaRinda A. Holland, Emily A. Kaelin, Bereket Estifanos, Nicholas J. Mellor, Jason Steel, Lily I. Wu, Arvind Varsani, Rolf U. Halden, Brenda G. Hogue, Matthew Scotch, Efrem S. Lim

EPI\_ISL\_424669 hCoV-19/USA/AZ-ASU2923/2020 North America / USA / Arizona 2020-03-16 Arizona State University Health Services Arizona State University Rabia Maqsood, LaRinda A. Holland, Emily A. Kaelin, Bereket Estifanos, Nicholas J. Mellor, Jason Steel, Lily I. Wu, Arvind Varsani, Rolf U. Halden, Brenda G. Hogue, Matthew Scotch, Efrem S. Lim

EPI\_ISL\_424670 hCoV-19/Mexico/Queretaro-IndRE\_04/2020 North America / Mexico / Queretaro 2020-03-10 Laboratorio Estatal de Salud Publica del Estado de Queretaro Instituto de Diagnóstico y Referencia Epidemiologicos Gisela Barrera Badillo, Irma López Martínez, Lucia Hernández Rivas, Edgar Mendieta Condado, Fabiola Garcés Ayala, Adnan Araiza Rodríguez, Celia Boukadida, Santiago Avila Ríos, Mario Mújica Sánchez, José Arturo Martínez Orozco, Eduardo Becerril Vargas, Joel Armando Vázquez Pérez, Victor Hugo Borja Aburto, Concepción Grajales Muñiz, Cesar Raúl González Bonilla, Carolina González Torres, Francisco Javier Gaytán Cervantes, José Esteban Muñoz Medina, Guillermo M. Ruiz-Palacios, Pilar Ramos Cervantes, Violeta Ibarra Gonzalez, Fernando Ledesma Barrientos, Luis Alberto García Andrade, Alfredo Ponce de León Garduño, Blanca Taboada, Alejandro Sánchez, Pavel Isa, Ricardo Grande, Gloria Vázquez, Francisco Pulido, Carlos F. Arias, José Ernesto Ramírez González

EPI\_ISL\_424671 hCoV-19/USA/AZ-ASU2936/2020 North America / USA / Arizona 2020-03-17 Arizona State University Health Services Arizona State University Rabia Maqsood, LaRinda A. Holland, Emily A. Kaelin, Bereket Estifanos, Nicholas J. Mellor, Jason Steel, Lily I. Wu, Arvind Varsani, Rolf U. Halden, Brenda G. Hogue, Matthew Scotch, Efrem S. Lim

EPI\_ISL\_424672 hCoV-19/Mexico/Puebla-IndRE\_05/2020 North America / Mexico / Puebla 2020-03-11 Laboratorio Estatal de Salud Publica del Estado de Puebla Instituto de Diagnostico y Referencia Epidemiologicos Fabiola Garcés Ayala, Gisela Barrera Badillo, Irma López Martínez, Lucia Hernández Rivas, Edgar Mendieta Condado, Adnan Araiza Rodríguez, Celia Boukadida, Santiago Avila Ríos, Mario Mújica Sánchez, José Arturo Martínez Orozco, Eduardo Becerril Vargas, Joel Armando Vázquez Pérez, Victor Hugo Borja Aburto, Concepción Grajales Muñiz, Cesar Raúl González Bonilla, Carolina González Torres, Francisco Javier Gaytán Cervantes, José Esteban Muñoz Medina, Guillermo M. Ruiz-Palacios, Pilar Ramos Cervantes, Violeta Ibarra Gonzalez, Fernando Ledesma Barrientos, Luis Alberto García Andrade, Alfredo Ponce de León Garduño, Blanca Taboada, Alejandro Sánchez, Pavel Isa, Ricardo Grande, Gloria Vázquez, Francisco Pulido, Carlos F. Arias, José Ernesto Ramírez González

EPI\_ISL\_424673 hCoV-19/Mexico/CDMX-IndRE\_06/2020 North America / Mexico / CDMX 2020-03-12 Instituto de Diagnostico y Referencia Epidemiologicos Instituto de Diagnostico y Referencia Epidemiologicos Adnan Araiza Rodríguez, Edgar Mendieta Condado, Fabiola Garcés Ayala, Gisela Barrera Badillo, Irma López Martínez, Lucia Hernández Rivas, Celia Boukadida, Santiago Avila Ríos, Mario Mújica Sánchez, José Arturo Martínez Orozco, Eduardo Becerril Vargas, Joel Armando Vázquez Pérez, Victor Hugo Borja Aburto, Concepción Grajales Muñiz, Cesar Raúl González Bonilla, Carolina González Torres, Francisco Javier Gaytán Cervantes, José Esteban Muñoz Medina, Guillermo M. Ruiz-Palacios, Pilar Ramos Cervantes, Violeta Ibarra Gonzalez, Fernando Ledesma Barrientos, Luis Alberto García Andrade, Alfredo Ponce de León Garduño, Blanca Taboada, Alejandro Sánchez, Pavel Isa, Ricardo Grande, Gloria Vázquez, Francisco Pulido, Carlos F. Arias, José Ernesto Ramírez González

EPI\_ISL\_424841 hCoV-19/USA/SC\_3569/2020 North America / USA / South Carolina 2020-03-06 SC Dept of Health and Env. Control-Bureau of Laboratories Pathogen Discovery, Respiratory Viruses Branch, Division of Viral Diseases, Centers for Disease Control and Prevention Yan Li, Krista Queen, Clinton R. Paden, Rachel Marine, Anna Uehara, Ying Tao, Jing Zhang, Haibin Wang, Mary S. Keckler, Alison S. Laufer Halpin, Christopher A. Elkins, Suxiang Tong

EPI\_ISL\_424842 hCoV-19/USA/SC\_3575/2020 North America / USA / South Carolina 2020-03-07 SC Dept of Health and Env. Control-Bureau of Laboratories Pathogen Discovery, Respiratory Viruses Branch, Division of Viral Diseases, Centers for Disease Control and Prevention Yan Li, Krista Queen, Clinton R. Paden, Rachel Marine, Anna Uehara, Ying Tao, Jing Zhang, Haibin Wang, Mary S. Keckler, Alison S. Laufer Halpin, Christopher A. Elkins, Suxiang Tong

EPI\_ISL\_424843 hCoV-19/USA/MA\_0020/2020 North America / USA / Massachusetts 2020-03-05 MA State Public Health Laboratory Pathogen Discovery, Respiratory Viruses Branch, Division of Viral Diseases, Centers for Disease Control and Prevention Yan Li, Krista Queen, Clinton R. Paden, Rachel Marine, Anna Uehara, Ying Tao, Jing Zhang, Haibin Wang, Mary S. Keckler, Alison S. Laufer Halpin, Christopher A. Elkins, Suxiang Tong

EPI\_ISL\_424844 hCoV-19/USA/MA\_3672/2020 North America / USA / Massachusetts 2020-03-06 MA State Public Health Laboratory Pathogen Discovery, Respiratory Viruses Branch, Division of Viral Diseases, Centers for Disease Control and Prevention Yan Li, Krista Queen, Clinton R. Paden, Rachel Marine, Anna Uehara, Ying Tao, Jing Zhang, Haibin Wang, Mary S. Keckler, Alison S. Laufer Halpin, Christopher A. Elkins, Suxiang Tong

EPI\_ISL\_424845 hCoV-19/USA/MA\_3699/2020 North America / USA / Massachusetts 2020-03-06 MA State Public Health Laboratory Pathogen Discovery, Respiratory Viruses Branch, Division of Viral Diseases, Centers for Disease Control and Prevention Yan Li, Krista Queen, Clinton R. Paden, Rachel Marine, Anna Uehara, Ying Tao, Jing Zhang, Haibin Wang, Mary S. Keckler, Alison S. Laufer Halpin, Christopher A. Elkins, Suxiang Tong

EPI\_ISL\_424846 hCoV-19/USA/MA\_3878/2020 North America / USA / Massachusetts 2020-03-06 MA State Public Health Laboratory Pathogen Discovery, Respiratory Viruses Branch, Division of Viral Diseases, Centers for Disease Control and Prevention Yan Li, Krista Queen, Clinton R. Paden, Rachel Marine, Anna Uehara, Ying Tao, Jing Zhang, Haibin Wang, Mary S. Keckler, Alison S. Laufer Halpin, Christopher A. Elkins, Suxiang Tong

EPI\_ISL\_424847 hCoV-19/USA/MA\_4811/2020 North America / USA / Massachusetts 2020-03-07 MA State Public Health Laboratory Pathogen Discovery, Respiratory Viruses Branch, Division of Viral Diseases, Centers for Disease Control and Prevention Yan Li, Krista Queen, Clinton R. Paden, Rachel Marine, Anna Uehara, Ying Tao, Jing Zhang, Haibin Wang, Mary S. Keckler, Alison S. Laufer Halpin, Christopher A. Elkins, Suxiang Tong

EPI\_ISL\_424848 hCoV-19/USA/AZ\_8132/2020 North America / USA / Arizona 2020-03-09 AZ SPHL, Arizona Department of Health Services Pathogen Discovery, Respiratory Viruses Branch, Division of Viral Diseases, Centers for Disease Control and Prevention Yan Li, Krista Queen, Clinton R. Paden, Rachel Marine, Anna Uehara, Ying Tao, Jing Zhang, Haibin Wang, Mary S. Keckler, Alison S. Laufer Halpin, Christopher A. Elkins, Suxiang Tong

EPI\_ISL\_424849 hCoV-19/USA/AZ\_8135/2020 North America / USA / Arizona 2020-03-09 AZ SPHL, Arizona Department of Health Services Pathogen Discovery, Respiratory Viruses Branch, Division of Viral Diseases, Centers for Disease Control and Prevention Yan Li, Krista Queen, Clinton R. Paden, Rachel Marine, Anna Uehara, Ying Tao, Jing Zhang, Haibin Wang, Mary S. Keckler, Alison S. Laufer Halpin, Christopher A. Elkins, Suxiang Tong

EPI\_ISL\_424850 hCoV-19/USA/IL\_0087/2020 North America / USA / Illinois 2020-03-07 IL Department of Public Health Chicago Laboratory Pathogen Discovery, Respiratory Viruses Branch, Division of Viral Diseases, Centers for Disease Control and Prevention Yan Li, Krista Queen, Clinton R. Paden, Rachel Marine, Anna Uehara, Ying Tao, Jing Zhang, Haibin Wang, Mary S. Keckler, Alison S. Laufer Halpin, Christopher A. Elkins, Suxiang Tong

EPI\_ISL\_424851 hCoV-19/USA/IL\_0089/2020 North America / USA / Illinois 2020-03-07 IL Department of Public Health Chicago Laboratory Pathogen Discovery, Respiratory Viruses Branch, Division of Viral Diseases, Centers for Disease Control and Prevention Yan Li, Krista Queen, Clinton R. Paden, Rachel Marine, Anna Uehara, Ying Tao, Jing Zhang, Haibin Wang, Mary S. Keckler, Alison S. Laufer Halpin, Christopher A. Elkins, Suxiang Tong

EPI\_ISL\_424852 hCoV-19/USA/DC\_0004/2020 North America / USA / District of Columbia 2020-03-06 DC Public Health Lab/ Dept. of Forensic Sciences Pathogen Discovery, Respiratory Viruses Branch, Division of Viral Diseases, Centers for Disease Control and Prevention Yan Li, Krista Queen, Clinton R. Paden, Rachel Marine, Anna Uehara, Ying Tao, Jing Zhang, Haibin Wang, Mary S. Keckler, Alison S. Laufer Halpin, Christopher A. Elkins, Suxiang Tong

EPI\_ISL\_424853 hCoV-19/USA/FL\_9590/2020 North America / USA / Florida 2020-03-05 FL Bureau of Public Health Laboratories-Miami Pathogen Discovery, Respiratory Viruses Branch, Division of Viral Diseases, Centers for Disease Control and Prevention Yan Li, Krista Queen, Clinton R. Paden, Rachel Marine, Anna Uehara, Ying Tao, Jing Zhang, Haibin Wang, Mary S. Keckler, Alison S. Laufer Halpin, Christopher A. Elkins, Suxiang Tong

EPI\_ISL\_424854 hCoV-19/USA/FL\_9655/2020 North America / USA / Florida 2020-03-05 FL Bureau of Public Health Laboratories-Miami Pathogen Discovery, Respiratory Viruses Branch, Division of Viral Diseases, Centers for Disease Control and Prevention Yan Li, Krista Queen, Clinton R. Paden, Rachel Marine, Anna Uehara, Ying Tao, Jing Zhang, Haibin Wang, Mary S. Keckler, Alison S. Laufer Halpin, Christopher A. Elkins, Suxiang Tong

EPI\_ISL\_425944 hCoV-19/Scotland/EDB214/2020 Europe / United Kingdom / Scotland 2020-03-26 Virology Department, Royal Infirmary of Edinburgh, NHS Lothian / School of Biological Sciences, University of Edinburgh / Institute of Genetics and Molecular Medicine, University of Edinburgh COVID-19 Genomics UK (COG-UK) Consortium McHugh M, Dewar R, Rooke S, Gallagher M, Balcaza C, O'Toole A, Hill V, McCrone JT, Colquhoun R, Yu X, Jackson B, Scher E, Rambaut A, Williams TC, Templeton K

EPI\_ISL\_425945 hCoV-19/Scotland/EDB216/2020 Europe / United Kingdom / Scotland 2020-03-26 Virology Department, Royal Infirmary of Edinburgh, NHS Lothian / School of Biological Sciences, University of Edinburgh / Institute of Genetics and Molecular Medicine, University of Edinburgh COVID-19 Genomics UK (COG-UK) Consortium McHugh M, Dewar R, Rooke S, Gallagher M, Balcaza C, O'Toole A, Hill V, McCrone JT, Colquhoun R, Yu X, Jackson B, Scher E, Rambaut A, Williams TC, Templeton K

EPI\_ISL\_425947 hCoV-19/Scotland/EDB219/2020 Europe / United Kingdom / Scotland 2020-03-26 Virology Department, Royal Infirmary of Edinburgh, NHS Lothian / School of Biological Sciences, University of Edinburgh / Institute of Genetics and Molecular Medicine, University of Edinburgh COVID-19 Genomics UK (COG-UK) Consortium McHugh M, Dewar R, Rooke S, Gallagher M, Balcaza C, O'Toole A, Hill V, McCrone JT, Colquhoun R, Yu X, Jackson B, Scher E, Rambaut A, Williams TC, Templeton K

EPI\_ISL\_425948 hCoV-19/Scotland/EDB222/2020 Europe / United Kingdom / Scotland 2020-03-26 Virology Department, Royal Infirmary of Edinburgh, NHS Lothian / School of Biological Sciences, University of Edinburgh / Institute of Genetics and Molecular Medicine, University of Edinburgh COVID-19 Genomics UK (COG-UK) Consortium McHugh M, Dewar R, Rooke S, Gallagher M, Balcaza C, O'Toole A, Hill V, McCrone JT, Colquhoun R, Yu X, Jackson B, Scher E, Rambaut A, Williams TC, Templeton K

EPI\_ISL\_425949 hCoV-19/Scotland/EDB226/2020 Europe / United Kingdom / Scotland 2020-03-26 Virology Department, Royal Infirmary of Edinburgh, NHS Lothian / School of Biological Sciences, University of Edinburgh / Institute of Genetics and Molecular Medicine, University of Edinburgh COVID-19 Genomics UK (COG-UK) Consortium McHugh M, Dewar R, Rooke S, Gallagher M, Balcaza C, O'Toole A, Hill V, McCrone JT, Colquhoun R, Yu X, Jackson B, Scher E, Rambaut A, Williams TC, Templeton K





EPI\_ISL\_425988 hCoV-19/Scotland/EDB379/2020 Europe / United Kingdom / Scotland 2020-03-30  
Virology Department, Royal Infirmary of Edinburgh, NHS Lothian / School of Biological Sciences, University of  
Edinburgh / Institute of Genetics and Molecular Medicine, University of Edinburgh COVID-19 Genomics UK  
(COG-UK) Consortium McHugh M, Dewar R, Rooke S, Gallagher M, Balcaza C, O'Toole A, Hill V, McCrone JT,  
Colquhoun R, Yu X, Jackson B, Scher E, Rambaut A, Williams TC, Templeton K

EPI\_ISL\_425990 hCoV-19/Scotland/EDB383/2020 Europe / United Kingdom / Scotland 2020-03-30  
Virology Department, Royal Infirmary of Edinburgh, NHS Lothian / School of Biological Sciences, University of  
Edinburgh / Institute of Genetics and Molecular Medicine, University of Edinburgh COVID-19 Genomics UK  
(COG-UK) Consortium McHugh M, Dewar R, Rooke S, Gallagher M, Balcaza C, O'Toole A, Hill V, McCrone JT,  
Colquhoun R, Yu X, Jackson B, Scher E, Rambaut A, Williams TC, Templeton K

EPI\_ISL\_425991 hCoV-19/Scotland/EDB386/2020 Europe / United Kingdom / Scotland 2020-03-30  
Virology Department, Royal Infirmary of Edinburgh, NHS Lothian / School of Biological Sciences, University of  
Edinburgh / Institute of Genetics and Molecular Medicine, University of Edinburgh COVID-19 Genomics UK  
(COG-UK) Consortium McHugh M, Dewar R, Rooke S, Gallagher M, Balcaza C, O'Toole A, Hill V, McCrone JT,  
Colquhoun R, Yu X, Jackson B, Scher E, Rambaut A, Williams TC, Templeton K

EPI\_ISL\_425992 hCoV-19/Scotland/EDB389/2020 Europe / United Kingdom / Scotland 2020-03-30  
Virology Department, Royal Infirmary of Edinburgh, NHS Lothian / School of Biological Sciences, University of  
Edinburgh / Institute of Genetics and Molecular Medicine, University of Edinburgh COVID-19 Genomics UK  
(COG-UK) Consortium McHugh M, Dewar R, Rooke S, Gallagher M, Balcaza C, O'Toole A, Hill V, McCrone JT,  
Colquhoun R, Yu X, Jackson B, Scher E, Rambaut A, Williams TC, Templeton K

EPI\_ISL\_425993 hCoV-19/Scotland/EDB390/2020 Europe / United Kingdom / Scotland 2020-03-30  
Virology Department, Royal Infirmary of Edinburgh, NHS Lothian / School of Biological Sciences, University of  
Edinburgh / Institute of Genetics and Molecular Medicine, University of Edinburgh COVID-19 Genomics UK  
(COG-UK) Consortium McHugh M, Dewar R, Rooke S, Gallagher M, Balcaza C, O'Toole A, Hill V, McCrone JT,  
Colquhoun R, Yu X, Jackson B, Scher E, Rambaut A, Williams TC, Templeton K

EPI\_ISL\_425994 hCoV-19/Scotland/EDB391/2020 Europe / United Kingdom / Scotland 2020-03-30  
Virology Department, Royal Infirmary of Edinburgh, NHS Lothian / School of Biological Sciences, University of  
Edinburgh / Institute of Genetics and Molecular Medicine, University of Edinburgh COVID-19 Genomics UK  
(COG-UK) Consortium McHugh M, Dewar R, Rooke S, Gallagher M, Balcaza C, O'Toole A, Hill V, McCrone JT,  
Colquhoun R, Yu X, Jackson B, Scher E, Rambaut A, Williams TC, Templeton K

EPI\_ISL\_425995 hCoV-19/Scotland/EDB392/2020 Europe / United Kingdom / Scotland 2020-03-30  
Virology Department, Royal Infirmary of Edinburgh, NHS Lothian / School of Biological Sciences, University of  
Edinburgh / Institute of Genetics and Molecular Medicine, University of Edinburgh COVID-19 Genomics UK  
(COG-UK) Consortium McHugh M, Dewar R, Rooke S, Gallagher M, Balcaza C, O'Toole A, Hill V, McCrone JT,  
Colquhoun R, Yu X, Jackson B, Scher E, Rambaut A, Williams TC, Templeton K

EPI\_ISL\_425996 hCoV-19/Scotland/EDB396/2020 Europe / United Kingdom / Scotland 2020-03-30  
Virology Department, Royal Infirmary of Edinburgh, NHS Lothian / School of Biological Sciences, University of  
Edinburgh / Institute of Genetics and Molecular Medicine, University of Edinburgh COVID-19 Genomics UK  
(COG-UK) Consortium McHugh M, Dewar R, Rooke S, Gallagher M, Balcaza C, O'Toole A, Hill V, McCrone JT,  
Colquhoun R, Yu X, Jackson B, Scher E, Rambaut A, Williams TC, Templeton K

EPI\_ISL\_425997 hCoV-19/Scotland/EDB397/2020 Europe / United Kingdom / Scotland 2020-03-30  
Virology Department, Royal Infirmary of Edinburgh, NHS Lothian / School of Biological Sciences, University of  
Edinburgh / Institute of Genetics and Molecular Medicine, University of Edinburgh COVID-19 Genomics UK  
(COG-UK) Consortium McHugh M, Dewar R, Rooke S, Gallagher M, Balcaza C, O'Toole A, Hill V, McCrone JT,  
Colquhoun R, Yu X, Jackson B, Scher E, Rambaut A, Williams TC, Templeton K

EPI\_ISL\_425998 hCoV-19/Scotland/EDB399/2020 Europe / United Kingdom / Scotland 2020-03-30  
Virology Department, Royal Infirmary of Edinburgh, NHS Lothian / School of Biological Sciences, University of  
Edinburgh / Institute of Genetics and Molecular Medicine, University of Edinburgh COVID-19 Genomics UK  
(COG-UK) Consortium McHugh M, Dewar R, Rooke S, Gallagher M, Balcaza C, O'Toole A, Hill V, McCrone JT,  
Colquhoun R, Yu X, Jackson B, Scher E, Rambaut A, Williams TC, Templeton K

EPI\_ISL\_425999 hCoV-19/Scotland/EDB401/2020 Europe / United Kingdom / Scotland 2020-03-29  
Virology Department, Royal Infirmary of Edinburgh, NHS Lothian / School of Biological Sciences, University of  
Edinburgh / Institute of Genetics and Molecular Medicine, University of Edinburgh COVID-19 Genomics UK  
(COG-UK) Consortium McHugh M, Dewar R, Rooke S, Gallagher M, Balcaza C, O'Toole A, Hill V, McCrone JT,  
Colquhoun R, Yu X, Jackson B, Scher E, Rambaut A, Williams TC, Templeton K

EPI\_ISL\_427001 hCoV-19/Australia/VIC716/2020 Oceania / Australia / Victoria 2020-03-27 Victorian  
Infectious Diseases Reference Laboratory (VIDRL) Microbiological Diagnostic Unit Public Health  
Laboratory and Victorian Infectious Diseases Reference Laboratory, Doherty Institute Caly L., Seemann T.,  
Sait, M., Schultz M., Druce J., Sherry, N.

EPI\_ISL\_427002 hCoV-19/Australia/VIC718/2020 Oceania / Australia / Victoria 2020-03-27 Victorian  
Infectious Diseases Reference Laboratory (VIDRL) Microbiological Diagnostic Unit Public Health  
Laboratory and Victorian Infectious Diseases Reference Laboratory, Doherty Institute Caly L., Seemann T.,  
Sait, M., Schultz M., Druce J., Sherry, N.

EPI\_ISL\_427003 hCoV-19/Australia/VIC720/2020 Oceania / Australia / Victoria 2020-03-28 Victorian  
Infectious Diseases Reference Laboratory (VIDRL) Microbiological Diagnostic Unit Public Health  
Laboratory and Victorian Infectious Diseases Reference Laboratory, Doherty Institute Caly L., Seemann T.,  
Sait, M., Schultz M., Druce J., Sherry, N.

EPI\_ISL\_427006 hCoV-19/Australia/VIC725/2020 Oceania / Australia / Victoria 2020-03-28 Victorian  
Infectious Diseases Reference Laboratory (VIDRL) Microbiological Diagnostic Unit Public Health  
Laboratory and Victorian Infectious Diseases Reference Laboratory, Doherty Institute Caly L., Seemann T.,





|                                                                                      |                                                                                |                                                                                                                               |
|--------------------------------------------------------------------------------------|--------------------------------------------------------------------------------|-------------------------------------------------------------------------------------------------------------------------------|
| Infectious Diseases Reference Laboratory (VIDRL)                                     | Microbiological Diagnostic Unit                                                | Public Health                                                                                                                 |
| Laboratory and Victorian Infectious Diseases Reference Laboratory, Doherty Institute | Caly L., Seemann T., Sait, M., Schultz M., Druce J., Sherry, N.                |                                                                                                                               |
| EPI_ISL_427031 hCoV-19/Australia/VIC754/2020                                         | Oceania / Australia / Victoria                                                 | 2020-03-30 Victorian                                                                                                          |
| Infectious Diseases Reference Laboratory (VIDRL)                                     | Microbiological Diagnostic Unit                                                | Public Health                                                                                                                 |
| Laboratory and Victorian Infectious Diseases Reference Laboratory, Doherty Institute | Caly L., Seemann T., Sait, M., Schultz M., Druce J., Sherry, N.                |                                                                                                                               |
| EPI_ISL_427034 hCoV-19/Australia/VIC757/2020                                         | Oceania / Australia / Victoria                                                 | 2020-03-31 Victorian                                                                                                          |
| Infectious Diseases Reference Laboratory (VIDRL)                                     | Microbiological Diagnostic Unit                                                | Public Health                                                                                                                 |
| Laboratory and Victorian Infectious Diseases Reference Laboratory, Doherty Institute | Caly L., Seemann T., Sait, M., Schultz M., Druce J., Sherry, N.                |                                                                                                                               |
| EPI_ISL_427038 hCoV-19/Australia/VIC762/2020                                         | Oceania / Australia / Victoria                                                 | 2020-03-29 Victorian                                                                                                          |
| Infectious Diseases Reference Laboratory (VIDRL)                                     | Microbiological Diagnostic Unit                                                | Public Health                                                                                                                 |
| Laboratory and Victorian Infectious Diseases Reference Laboratory, Doherty Institute | Caly L., Seemann T., Sait, M., Schultz M., Druce J., Sherry, N.                |                                                                                                                               |
| EPI_ISL_427040 hCoV-19/Australia/VIC764/2020                                         | Oceania / Australia / Victoria                                                 | 2020-03-29 Victorian                                                                                                          |
| Infectious Diseases Reference Laboratory (VIDRL)                                     | Microbiological Diagnostic Unit                                                | Public Health                                                                                                                 |
| Laboratory and Victorian Infectious Diseases Reference Laboratory, Doherty Institute | Caly L., Seemann T., Sait, M., Schultz M., Druce J., Sherry, N.                |                                                                                                                               |
| EPI_ISL_427041 hCoV-19/Australia/VIC765/2020                                         | Oceania / Australia / Victoria                                                 | 2020-03-29 Victorian                                                                                                          |
| Infectious Diseases Reference Laboratory (VIDRL)                                     | Microbiological Diagnostic Unit                                                | Public Health                                                                                                                 |
| Laboratory and Victorian Infectious Diseases Reference Laboratory, Doherty Institute | Caly L., Seemann T., Sait, M., Schultz M., Druce J., Sherry, N.                |                                                                                                                               |
| EPI_ISL_427043 hCoV-19/Greece/13/2020                                                | Europe / Greece / Athens                                                       | 2020-03-18 Laboratory of                                                                                                      |
| Microbiology, Medical School, National and Kapodistrian University of Athens         | Laboratory of Biology, Department of Medicine, Democritus University of Thrace | Bampali,M., Dovrolis,N., Gatzidou,E., Froukala,E., Stavropoulou,A., Veletza,S., Tsakris,A., Spanakis,N. and Karakasiliotis,I. |
| EPI_ISL_427045 hCoV-19/Australia/VIC768/2020                                         | Oceania / Australia / Victoria                                                 | 2020-03-20 Victorian                                                                                                          |
| Infectious Diseases Reference Laboratory (VIDRL)                                     | Microbiological Diagnostic Unit                                                | Public Health                                                                                                                 |
| Laboratory and Victorian Infectious Diseases Reference Laboratory, Doherty Institute | Caly L., Seemann T., Sait, M., Schultz M., Druce J., Sherry, N.                |                                                                                                                               |
| EPI_ISL_427046 hCoV-19/Australia/VIC769/2020                                         | Oceania / Australia / Victoria                                                 | 2020-03-20 Victorian                                                                                                          |
| Infectious Diseases Reference Laboratory (VIDRL)                                     | Microbiological Diagnostic Unit                                                | Public Health                                                                                                                 |
| Laboratory and Victorian Infectious Diseases Reference Laboratory, Doherty Institute | Caly L., Seemann T., Sait, M., Schultz M., Druce J., Sherry, N.                |                                                                                                                               |
| EPI_ISL_427048 hCoV-19/Australia/VIC772/2020                                         | Oceania / Australia / Victoria                                                 | 2020-03-20 Victorian                                                                                                          |
| Infectious Diseases Reference Laboratory (VIDRL)                                     | Microbiological Diagnostic Unit                                                | Public Health                                                                                                                 |
| Laboratory and Victorian Infectious Diseases Reference Laboratory, Doherty Institute | Caly L., Seemann T., Sait, M., Schultz M., Druce J., Sherry, N.                |                                                                                                                               |
| EPI_ISL_427049 hCoV-19/Australia/VIC773/2020                                         | Oceania / Australia / Victoria                                                 | 2020-03-20 Victorian                                                                                                          |
| Infectious Diseases Reference Laboratory (VIDRL)                                     | Microbiological Diagnostic Unit                                                | Public Health                                                                                                                 |
| Laboratory and Victorian Infectious Diseases Reference Laboratory, Doherty Institute | Caly L., Seemann T., Sait, M., Schultz M., Druce J., Sherry, N.                |                                                                                                                               |
| EPI_ISL_427054 hCoV-19/Australia/VIC779/2020                                         | Oceania / Australia / Victoria                                                 | 2020-03-30 Microbiological                                                                                                    |
| Diagnostic Unit Public Health Laboratory                                             | Microbiological Diagnostic Unit                                                | Public Health Laboratory                                                                                                      |
| Seemann T., Schultz M., Sait, M., Sherry, N.                                         |                                                                                |                                                                                                                               |
| EPI_ISL_427055 hCoV-19/Australia/VIC780/2020                                         | Oceania / Australia / Victoria                                                 | 2020-03-30 Microbiological                                                                                                    |
| Diagnostic Unit Public Health Laboratory                                             | Microbiological Diagnostic Unit                                                | Public Health Laboratory                                                                                                      |
| Seemann T., Schultz M., Sait, M., Sherry, N.                                         |                                                                                |                                                                                                                               |
| EPI_ISL_427057 hCoV-19/Australia/VIC782/2020                                         | Oceania / Australia / Victoria                                                 | 2020-03-30 Microbiological                                                                                                    |
| Diagnostic Unit Public Health Laboratory                                             | Microbiological Diagnostic Unit                                                | Public Health Laboratory                                                                                                      |
| Seemann T., Schultz M., Sait, M., Sherry, N.                                         |                                                                                |                                                                                                                               |
| EPI_ISL_427058 hCoV-19/Australia/VIC783/2020                                         | Oceania / Australia / Victoria                                                 | 2020-03-30 Microbiological                                                                                                    |
| Diagnostic Unit Public Health Laboratory                                             | Microbiological Diagnostic Unit                                                | Public Health Laboratory                                                                                                      |
| Seemann T., Schultz M., Sait, M., Sherry, N.                                         |                                                                                |                                                                                                                               |
| EPI_ISL_427060 hCoV-19/Australia/VIC785/2020                                         | Oceania / Australia / Victoria                                                 | 2020-03-30 Microbiological                                                                                                    |
| Diagnostic Unit Public Health Laboratory                                             | Microbiological Diagnostic Unit                                                | Public Health Laboratory                                                                                                      |
| Seemann T., Schultz M., Sait, M., Sherry, N.                                         |                                                                                |                                                                                                                               |
| EPI_ISL_427061 hCoV-19/Australia/VIC786/2020                                         | Oceania / Australia / Victoria                                                 | 2020-03-30 Microbiological                                                                                                    |
| Diagnostic Unit Public Health Laboratory                                             | Microbiological Diagnostic Unit                                                | Public Health Laboratory                                                                                                      |
| Seemann T., Schultz M., Sait, M., Sherry, N.                                         |                                                                                |                                                                                                                               |
| EPI_ISL_427062 hCoV-19/Australia/VIC787/2020                                         | Oceania / Australia / Victoria                                                 | 2020-03-30 Microbiological                                                                                                    |
| Diagnostic Unit Public Health Laboratory                                             | Microbiological Diagnostic Unit                                                | Public Health Laboratory                                                                                                      |
| Seemann T., Schultz M., Sait, M., Sherry, N.                                         |                                                                                |                                                                                                                               |
| EPI_ISL_427063 hCoV-19/Australia/VIC788/2020                                         | Oceania / Australia / Victoria                                                 | 2020-03-31 Microbiological                                                                                                    |
| Diagnostic Unit Public Health Laboratory                                             | Microbiological Diagnostic Unit                                                | Public Health Laboratory                                                                                                      |
| Seemann T., Schultz M., Sait, M., Sherry, N.                                         |                                                                                |                                                                                                                               |
| EPI_ISL_427065 hCoV-19/Australia/VIC790/2020                                         | Oceania / Australia / Victoria                                                 | 2020-03-31 Microbiological                                                                                                    |
| Diagnostic Unit Public Health Laboratory                                             | Microbiological Diagnostic Unit                                                | Public Health Laboratory                                                                                                      |
| Seemann T., Schultz M., Sait, M., Sherry, N.                                         |                                                                                |                                                                                                                               |

|                                                                                      |                               |                                              |            |                 |
|--------------------------------------------------------------------------------------|-------------------------------|----------------------------------------------|------------|-----------------|
| EPI_ISL_427068                                                                       | hCoV-19/Australia/VIC793/2020 | Oceania / Australia / Victoria               | 2020-03-31 | Microbiological |
| Diagnostic Unit Public Health Laboratory                                             |                               |                                              |            |                 |
| Seemann T., Schultz M., Sait, M., Sherry, N.                                         |                               |                                              |            |                 |
| EPI_ISL_427069                                                                       | hCoV-19/Australia/VIC794/2020 | Oceania / Australia / Victoria               | 2020-03-31 | Microbiological |
| Diagnostic Unit Public Health Laboratory                                             |                               |                                              |            |                 |
| Seemann T., Schultz M., Sait, M., Sherry, N.                                         |                               |                                              |            |                 |
| EPI_ISL_427070                                                                       | hCoV-19/Australia/VIC796/2020 | Oceania / Australia / Victoria               | 2020-03-31 | Microbiological |
| Diagnostic Unit Public Health Laboratory                                             |                               |                                              |            |                 |
| Seemann T., Schultz M., Sait, M., Sherry, N.                                         |                               |                                              |            |                 |
| EPI_ISL_427071                                                                       | hCoV-19/Australia/VIC797/2020 | Oceania / Australia / Victoria               | 2020-04-01 | Microbiological |
| Diagnostic Unit Public Health Laboratory                                             |                               |                                              |            |                 |
| Seemann T., Schultz M., Sait, M., Sherry, N.                                         |                               |                                              |            |                 |
| EPI_ISL_427072                                                                       | hCoV-19/Australia/VIC798/2020 | Oceania / Australia / Victoria               | 2020-04-01 | Microbiological |
| Diagnostic Unit Public Health Laboratory                                             |                               |                                              |            |                 |
| Seemann T., Schultz M., Sait, M., Sherry, N.                                         |                               |                                              |            |                 |
| EPI_ISL_427073                                                                       | hCoV-19/Australia/VIC799/2020 | Oceania / Australia / Victoria               | 2020-04-01 | Microbiological |
| Diagnostic Unit Public Health Laboratory                                             |                               |                                              |            |                 |
| Seemann T., Schultz M., Sait, M., Sherry, N.                                         |                               |                                              |            |                 |
| EPI_ISL_427074                                                                       | hCoV-19/Australia/VIC800/2020 | Oceania / Australia / Victoria               | 2020-04-01 | Microbiological |
| Diagnostic Unit Public Health Laboratory                                             |                               |                                              |            |                 |
| Seemann T., Schultz M., Sait, M., Sherry, N.                                         |                               |                                              |            |                 |
| EPI_ISL_427076                                                                       | hCoV-19/Australia/VIC802/2020 | Oceania / Australia / Victoria               | 2020-04-01 | Microbiological |
| Diagnostic Unit Public Health Laboratory                                             |                               |                                              |            |                 |
| Seemann T., Schultz M., Sait, M., Sherry, N.                                         |                               |                                              |            |                 |
| EPI_ISL_427079                                                                       | hCoV-19/Australia/VIC805/2020 | Oceania / Australia / Victoria               | 2020-03-16 | Victorian       |
| Infectious Diseases Reference Laboratory (VIDRL)                                     |                               |                                              |            |                 |
| Laboratory and Victorian Infectious Diseases Reference Laboratory, Doherty Institute |                               |                                              |            |                 |
| Caly L., Seemann T., Sait, M., Schultz M., Druce J., Sherry, N.                      |                               |                                              |            |                 |
| EPI_ISL_427080                                                                       | hCoV-19/Australia/VIC806/2020 | Oceania / Australia / Victoria               | 2020-03-23 | Victorian       |
| Infectious Diseases Reference Laboratory (VIDRL)                                     |                               |                                              |            |                 |
| Laboratory and Victorian Infectious Diseases Reference Laboratory, Doherty Institute |                               |                                              |            |                 |
| Caly L., Seemann T., Sait, M., Schultz M., Druce J., Sherry, N.                      |                               |                                              |            |                 |
| EPI_ISL_427081                                                                       | hCoV-19/Australia/VIC807/2020 | Oceania / Australia / Victoria               | 2020-03-24 | Victorian       |
| Infectious Diseases Reference Laboratory (VIDRL)                                     |                               |                                              |            |                 |
| Laboratory and Victorian Infectious Diseases Reference Laboratory, Doherty Institute |                               |                                              |            |                 |
| Caly L., Seemann T., Sait, M., Schultz M., Druce J., Sherry, N.                      |                               |                                              |            |                 |
| EPI_ISL_427082                                                                       | hCoV-19/Australia/VIC808/2020 | Oceania / Australia / Victoria               | 2020-03-28 | Victorian       |
| Infectious Diseases Reference Laboratory (VIDRL)                                     |                               |                                              |            |                 |
| Laboratory and Victorian Infectious Diseases Reference Laboratory, Doherty Institute |                               |                                              |            |                 |
| Caly L., Seemann T., Sait, M., Schultz M., Druce J., Sherry, N.                      |                               |                                              |            |                 |
| EPI_ISL_427085                                                                       | hCoV-19/Australia/VIC812/2020 | Oceania / Australia / Victoria               | 2020-04-02 | Victorian       |
| Infectious Diseases Reference Laboratory (VIDRL)                                     |                               |                                              |            |                 |
| Laboratory and Victorian Infectious Diseases Reference Laboratory, Doherty Institute |                               |                                              |            |                 |
| Caly L., Seemann T., Sait, M., Schultz M., Druce J., Sherry, N.                      |                               |                                              |            |                 |
| EPI_ISL_427092                                                                       | hCoV-19/Australia/VIC820/2020 | Oceania / Australia / Victoria               | 2020-04-03 | Victorian       |
| Infectious Diseases Reference Laboratory (VIDRL)                                     |                               |                                              |            |                 |
| Laboratory and Victorian Infectious Diseases Reference Laboratory, Doherty Institute |                               |                                              |            |                 |
| Caly L., Seemann T., Sait, M., Schultz M., Druce J., Sherry, N.                      |                               |                                              |            |                 |
| EPI_ISL_427093                                                                       | hCoV-19/Australia/VIC821/2020 | Oceania / Australia / Victoria               | 2020-04-03 | Victorian       |
| Infectious Diseases Reference Laboratory (VIDRL)                                     |                               |                                              |            |                 |
| Laboratory and Victorian Infectious Diseases Reference Laboratory, Doherty Institute |                               |                                              |            |                 |
| Caly L., Seemann T., Sait, M., Schultz M., Druce J., Sherry, N.                      |                               |                                              |            |                 |
| EPI_ISL_427094                                                                       | hCoV-19/Australia/VIC823/2020 | Oceania / Australia / Victoria               | 2020-04-03 | Victorian       |
| Infectious Diseases Reference Laboratory (VIDRL)                                     |                               |                                              |            |                 |
| Laboratory and Victorian Infectious Diseases Reference Laboratory, Doherty Institute |                               |                                              |            |                 |
| Caly L., Seemann T., Sait, M., Schultz M., Druce J., Sherry, N.                      |                               |                                              |            |                 |
| EPI_ISL_427095                                                                       | hCoV-19/Australia/VIC824/2020 | Oceania / Australia / Victoria               | 2020-04-03 | Victorian       |
| Infectious Diseases Reference Laboratory (VIDRL)                                     |                               |                                              |            |                 |
| Laboratory and Victorian Infectious Diseases Reference Laboratory, Doherty Institute |                               |                                              |            |                 |
| Caly L., Seemann T., Sait, M., Schultz M., Druce J., Sherry, N.                      |                               |                                              |            |                 |
| EPI_ISL_427096                                                                       | hCoV-19/Australia/VIC828/2020 | Oceania / Australia / Victoria               | 2020-04-03 | Victorian       |
| Infectious Diseases Reference Laboratory (VIDRL)                                     |                               |                                              |            |                 |
| Laboratory and Victorian Infectious Diseases Reference Laboratory, Doherty Institute |                               |                                              |            |                 |
| Caly L., Seemann T., Sait, M., Schultz M., Druce J., Sherry, N.                      |                               |                                              |            |                 |
| EPI_ISL_428300                                                                       | hCoV-19/USA/WI-UW-204/2020    | North America / USA / Wisconsin / Campbellsp | 2020-03-25 |                 |
| University of Wisconsin-Madison AIDS Vaccine Research Laboratories                   |                               |                                              |            |                 |
| University of Wisconsin-Madison AIDS Vaccine Research Laboratories                   |                               |                                              |            |                 |
| Gage Moreno, Katarina Braun, et al. AIDS Vaccine Research Laboratories               |                               |                                              |            |                 |
| EPI_ISL_428301                                                                       | hCoV-19/USA/WI-UW-205/2020    | North America / USA / Wisconsin / Milwaukee  | 2020-03-25 |                 |
| University of Wisconsin-Madison AIDS Vaccine Research Laboratories                   |                               |                                              |            |                 |
| University of Wisconsin-Madison AIDS Vaccine Research Laboratories                   |                               |                                              |            |                 |
| Gage Moreno, Katarina Braun, et al. AIDS Vaccine Research Laboratories               |                               |                                              |            |                 |



|                                                                                                                                                                                                                                        |                                                                                                                                                                                                                       |                                                                  |                                                                    |
|----------------------------------------------------------------------------------------------------------------------------------------------------------------------------------------------------------------------------------------|-----------------------------------------------------------------------------------------------------------------------------------------------------------------------------------------------------------------------|------------------------------------------------------------------|--------------------------------------------------------------------|
| University of Wisconsin-Madison AIDS Vaccine Research Laboratories                                                                                                                                                                     | Gage Moreno, Katarina Braun, et al.                                                                                                                                                                                   | AIDS Vaccine Research Laboratories                               | University of Wisconsin-Madison AIDS Vaccine Research Laboratories |
| EPI_ISL_428326                                                                                                                                                                                                                         | hCoV-19/USA/WI-UW-230/2020                                                                                                                                                                                            | North America / USA                                              | Wisconsin / Milwaukee 2020-03-26                                   |
| University of Wisconsin-Madison AIDS Vaccine Research Laboratories                                                                                                                                                                     | Gage Moreno, Katarina Braun, et al.                                                                                                                                                                                   | AIDS Vaccine Research Laboratories                               | University of Wisconsin-Madison AIDS Vaccine Research Laboratories |
| EPI_ISL_428327                                                                                                                                                                                                                         | hCoV-19/USA/WI-UW-231/2020                                                                                                                                                                                            | North America / USA                                              | Wisconsin / Milwaukee 2020-03-26                                   |
| University of Wisconsin-Madison AIDS Vaccine Research Laboratories                                                                                                                                                                     | Gage Moreno, Katarina Braun, et al.                                                                                                                                                                                   | AIDS Vaccine Research Laboratories                               | University of Wisconsin-Madison AIDS Vaccine Research Laboratories |
| EPI_ISL_428328                                                                                                                                                                                                                         | hCoV-19/USA/WI-UW-232/2020                                                                                                                                                                                            | North America / USA                                              | Wisconsin / Glendale 2020-03-27                                    |
| University of Wisconsin-Madison AIDS Vaccine Research Laboratories                                                                                                                                                                     | Gage Moreno, Katarina Braun, et al.                                                                                                                                                                                   | AIDS Vaccine Research Laboratories                               | University of Wisconsin-Madison AIDS Vaccine Research Laboratories |
| EPI_ISL_428329                                                                                                                                                                                                                         | hCoV-19/USA/WI-UW-233/2020                                                                                                                                                                                            | North America / USA                                              | Wisconsin / Milwaukee 2020-03-27                                   |
| University of Wisconsin-Madison AIDS Vaccine Research Laboratories                                                                                                                                                                     | Gage Moreno, Katarina Braun, et al.                                                                                                                                                                                   | AIDS Vaccine Research Laboratories                               | University of Wisconsin-Madison AIDS Vaccine Research Laboratories |
| EPI_ISL_428330                                                                                                                                                                                                                         | hCoV-19/USA/WI-UW-234/2020                                                                                                                                                                                            | North America / USA                                              | Wisconsin / Milwaukee 2020-03-26                                   |
| University of Wisconsin-Madison AIDS Vaccine Research Laboratories                                                                                                                                                                     | Gage Moreno, Katarina Braun, et al.                                                                                                                                                                                   | AIDS Vaccine Research Laboratories                               | University of Wisconsin-Madison AIDS Vaccine Research Laboratories |
| EPI_ISL_428331                                                                                                                                                                                                                         | hCoV-19/USA/WI-UW-235/2020                                                                                                                                                                                            | North America / USA                                              | Wisconsin / Cudahy 2020-03-28                                      |
| University of Wisconsin-Madison AIDS Vaccine Research Laboratories                                                                                                                                                                     | Gage Moreno, Katarina Braun, et al.                                                                                                                                                                                   | AIDS Vaccine Research Laboratories                               | University of Wisconsin-Madison AIDS Vaccine Research Laboratories |
| EPI_ISL_428332                                                                                                                                                                                                                         | hCoV-19/USA/WI-UW-236/2020                                                                                                                                                                                            | North America / USA                                              | Wisconsin / Milwaukee 2020-03-27                                   |
| University of Wisconsin-Madison AIDS Vaccine Research Laboratories                                                                                                                                                                     | Gage Moreno, Katarina Braun, et al.                                                                                                                                                                                   | AIDS Vaccine Research Laboratories                               | University of Wisconsin-Madison AIDS Vaccine Research Laboratories |
| EPI_ISL_428333                                                                                                                                                                                                                         | hCoV-19/USA/WI-UW-237/2020                                                                                                                                                                                            | North America / USA                                              | Wisconsin / Whitefish 2020-03-27                                   |
| University of Wisconsin-Madison AIDS Vaccine Research Laboratories                                                                                                                                                                     | Gage Moreno, Katarina Braun, et al.                                                                                                                                                                                   | AIDS Vaccine Research Laboratories                               | University of Wisconsin-Madison AIDS Vaccine Research Laboratories |
| EPI_ISL_428334                                                                                                                                                                                                                         | hCoV-19/USA/WI-UW-238/2020                                                                                                                                                                                            | North America / USA                                              | Wisconsin / Milwaukee 2020-03-27                                   |
| University of Wisconsin-Madison AIDS Vaccine Research Laboratories                                                                                                                                                                     | Gage Moreno, Katarina Braun, et al.                                                                                                                                                                                   | AIDS Vaccine Research Laboratories                               | University of Wisconsin-Madison AIDS Vaccine Research Laboratories |
| EPI_ISL_428335                                                                                                                                                                                                                         | hCoV-19/USA/WI-UW-239/2020                                                                                                                                                                                            | North America / USA                                              | Wisconsin / Mequon 2020-03-27                                      |
| University of Wisconsin-Madison AIDS Vaccine Research Laboratories                                                                                                                                                                     | Gage Moreno, Katarina Braun, et al.                                                                                                                                                                                   | AIDS Vaccine Research Laboratories                               | University of Wisconsin-Madison AIDS Vaccine Research Laboratories |
| EPI_ISL_428336                                                                                                                                                                                                                         | hCoV-19/USA/WI-UW-240/2020                                                                                                                                                                                            | North America / USA                                              | Wisconsin / Milwaukee 2020-03-27                                   |
| University of Wisconsin-Madison AIDS Vaccine Research Laboratories                                                                                                                                                                     | Gage Moreno, Katarina Braun, et al.                                                                                                                                                                                   | AIDS Vaccine Research Laboratories                               | University of Wisconsin-Madison AIDS Vaccine Research Laboratories |
| EPI_ISL_428337                                                                                                                                                                                                                         | hCoV-19/USA/WI-UW-241/2020                                                                                                                                                                                            | North America / USA                                              | Wisconsin / Milwaukee 2020-03-27                                   |
| University of Wisconsin-Madison AIDS Vaccine Research Laboratories                                                                                                                                                                     | Gage Moreno, Katarina Braun, et al.                                                                                                                                                                                   | AIDS Vaccine Research Laboratories                               | University of Wisconsin-Madison AIDS Vaccine Research Laboratories |
| EPI_ISL_428338                                                                                                                                                                                                                         | hCoV-19/USA/WI-UW-242/2020                                                                                                                                                                                            | North America / USA                                              | Wisconsin / Milwaukee 2020-03-28                                   |
| University of Wisconsin-Madison AIDS Vaccine Research Laboratories                                                                                                                                                                     | Gage Moreno, Katarina Braun, et al.                                                                                                                                                                                   | AIDS Vaccine Research Laboratories                               | University of Wisconsin-Madison AIDS Vaccine Research Laboratories |
| EPI_ISL_428339                                                                                                                                                                                                                         | hCoV-19/USA/WI-UW-243/2020                                                                                                                                                                                            | North America / USA                                              | Wisconsin / Grafton 2020-03-28                                     |
| University of Wisconsin-Madison AIDS Vaccine Research Laboratories                                                                                                                                                                     | Gage Moreno, Katarina Braun, et al.                                                                                                                                                                                   | AIDS Vaccine Research Laboratories                               | University of Wisconsin-Madison AIDS Vaccine Research Laboratories |
| EPI_ISL_428340                                                                                                                                                                                                                         | hCoV-19/USA/WI-UW-244/2020                                                                                                                                                                                            | North America / USA                                              | Wisconsin / Thiensville 2020-03-28                                 |
| University of Wisconsin-Madison AIDS Vaccine Research Laboratories                                                                                                                                                                     | Gage Moreno, Katarina Braun, et al.                                                                                                                                                                                   | AIDS Vaccine Research Laboratories                               | University of Wisconsin-Madison AIDS Vaccine Research Laboratories |
| EPI_ISL_428341                                                                                                                                                                                                                         | hCoV-19/USA/WI-UW-245/2020                                                                                                                                                                                            | North America / USA                                              | Wisconsin / Milwaukee 2020-03-28                                   |
| University of Wisconsin-Madison AIDS Vaccine Research Laboratories                                                                                                                                                                     | Gage Moreno, Katarina Braun, et al.                                                                                                                                                                                   | AIDS Vaccine Research Laboratories                               | University of Wisconsin-Madison AIDS Vaccine Research Laboratories |
| EPI_ISL_428343                                                                                                                                                                                                                         | hCoV-19/USA/WI-UW-247/2020                                                                                                                                                                                            | North America / USA                                              | Wisconsin / Port Washi 2020-03-28                                  |
| University of Wisconsin-Madison AIDS Vaccine Research Laboratories                                                                                                                                                                     | Gage Moreno, Katarina Braun, et al.                                                                                                                                                                                   | AIDS Vaccine Research Laboratories                               | University of Wisconsin-Madison AIDS Vaccine Research Laboratories |
| EPI_ISL_428344                                                                                                                                                                                                                         | hCoV-19/USA/WI-UW-248/2020                                                                                                                                                                                            | North America / USA                                              | Wisconsin / Milwaukee 2020-03-28                                   |
| University of Wisconsin-Madison AIDS Vaccine Research Laboratories                                                                                                                                                                     | Gage Moreno, Katarina Braun, et al.                                                                                                                                                                                   | AIDS Vaccine Research Laboratories                               | University of Wisconsin-Madison AIDS Vaccine Research Laboratories |
| EPI_ISL_428345                                                                                                                                                                                                                         | hCoV-19/USA/WI-UW-249/2020                                                                                                                                                                                            | North America / USA                                              | Wisconsin / Racine 2020-03-16                                      |
| University of Wisconsin-Madison AIDS Vaccine Research Laboratories                                                                                                                                                                     | Gage Moreno, Katarina Braun, et al.                                                                                                                                                                                   | AIDS Vaccine Research Laboratories                               | University of Wisconsin-Madison AIDS Vaccine Research Laboratories |
| EPI_ISL_428346                                                                                                                                                                                                                         | hCoV-19/Turkey/GLAB-CoV012/2020                                                                                                                                                                                       | Europe / Turkey / Istanbul                                       | 2020-04-17 Genomic                                                 |
| Laboratory (GLAB) (Conjoint lab of Health Directorate of Istanbul and Istanbul Technical University)                                                                                                                                   | Ilker Karacan, Tugba Kizilboga Akgun, Bugra Agaoglu, Gizem Alkurt, Jale Yildiz, Betsi Köse, Elifnaz Çelik, Arzu Irvem, Yasemin Kendir Demirkol, Ozlem Akgun Dogan, Mehtap Aydın, Levent Doganay, Gizem Dinler Doganay |                                                                  |                                                                    |
| EPI_ISL_428347                                                                                                                                                                                                                         | hCoV-19/France/IDF3384/2020                                                                                                                                                                                           | Europe / France / Ile De France                                  | Longjumeau 2020-03-23                                              |
| Service de Biologie Médicale - BP 125 Institut Pasteur, Paris Mélanie Albert, Marion Barbet, Sylvie Behillil, Méline Bizard, Angela Brisebarre, Flora Donati, Etienne Simon-Lorière, Vincent Enouf, Maud Vanpeene, Sylvie van der Werf |                                                                                                                                                                                                                       | National Reference Center for Viruses of Respiratory Infections, |                                                                    |
| EPI_ISL_428348                                                                                                                                                                                                                         | hCoV-19/France/GE3372/2020                                                                                                                                                                                            | Europe / France / Grand-est                                      | Gondrecourt-le-chateau 2020-03-20                                  |
| Maison de Santé du Val d'Ormois National Reference Center for Viruses of Respiratory Infections,                                                                                                                                       |                                                                                                                                                                                                                       |                                                                  |                                                                    |

Institut Pasteur, Paris Mélanie Albert, Marion Barbet, Sylvie Behillil, Meline Bizard, Angela Brisebarre, Flora Donati, Etienne Simon-Lorière, Vincent Enouf, Maud Vanpeene, Sylvie van der Werf  
EPI\_ISL\_428349 hCoV-19/France/IDF3386/2020 Europe / France / Ile De France / Longjumeau 2020-03-23  
Service de Biologie Médicale - BP 125 National Reference Center for Viruses of Respiratory Infections,  
Institut Pasteur, Paris Mélanie Albert, Marion Barbet, Sylvie Behillil, Meline Bizard, Angela Brisebarre, Flora Donati, Etienne Simon-Lorière, Vincent Enouf, Maud Vanpeene, Sylvie van der Werf  
EPI\_ISL\_428350 hCoV-19/France/HF3419/2020 Europe / France / Hauts De France / Chateau-thierry 2020-03-24  
CH Jean de Navarre Laboratoire de Biologie National Reference Center for Viruses of Respiratory Infections, Institut Pasteur, Paris Mélanie Albert, Marion Barbet, Sylvie Behillil, Meline Bizard, Angela Brisebarre, Flora Donati, Etienne Simon-Lorière, Vincent Enouf, Maud Vanpeene, Sylvie van der Werf  
EPI\_ISL\_428351 hCoV-19/France/IDF3509/2020 Europe / France / Ile De France / Orsay 2020-03-24 GH Nord  
Essonne Service de Biologie clinique National Reference Center for Viruses of Respiratory Infections, Institut Pasteur, Paris Mélanie Albert, Marion Barbet, Sylvie Behillil, Meline Bizard, Angela Brisebarre, Flora Donati, Etienne Simon-Lorière, Vincent Enouf, Maud Vanpeene, Sylvie van der Werf  
EPI\_ISL\_428352 hCoV-19/France/IDF3518/2020 Europe / France / Ile De France / Orsay 2020-03-23 GH Nord  
Essonne Service de Biologie clinique National Reference Center for Viruses of Respiratory Infections, Institut Pasteur, Paris Mélanie Albert, Marion Barbet, Sylvie Behillil, Meline Bizard, Angela Brisebarre, Flora Donati, Etienne Simon-Lorière, Vincent Enouf, Maud Vanpeene, Sylvie van der Werf  
EPI\_ISL\_428353 hCoV-19/France/HF3534/2020 Europe / France / Hauts De France / Compiègne 2020-03-24  
CH Compiègne Laboratoire de Biologie National Reference Center for Viruses of Respiratory Infections, Institut Pasteur, Paris Mélanie Albert, Marion Barbet, Sylvie Behillil, Meline Bizard, Angela Brisebarre, Flora Donati, Etienne Simon-Lorière, Vincent Enouf, Maud Vanpeene, Sylvie van der Werf  
EPI\_ISL\_428354 hCoV-19/France/IDF3577/2020 Europe / France / Ile De France / Longjumeau 2020-03-25  
LABM GH nord Essonne de Longjumeau - BP 125 National Reference Center for Viruses of Respiratory Infections, Institut Pasteur, Paris Mélanie Albert, Marion Barbet, Sylvie Behillil, Meline Bizard, Angela Brisebarre, Flora Donati, Etienne Simon-Lorière, Vincent Enouf, Maud Vanpeene, Sylvie van der Werf  
EPI\_ISL\_428355 hCoV-19/France/IDF2251/2020 Europe / France / Ile De France / Garches 2020-03-11  
Institut Médico légal- Hop R. Poincaré National Reference Center for Viruses of Respiratory Infections, Institut Pasteur, Paris Mélanie Albert, Marion Barbet, Sylvie Behillil, Meline Bizard, Angela Brisebarre, Flora Donati, Etienne Simon-Lorière, Vincent Enouf, Maud Vanpeene, Sylvie van der Werf  
EPI\_ISL\_428356 hCoV-19/France/IDF2252/2020 Europe / France / Ile De France / Garches 2020-03-11  
Institut Médico légal- Hop R. Poincaré National Reference Center for Viruses of Respiratory Infections, Institut Pasteur, Paris Mélanie Albert, Marion Barbet, Sylvie Behillil, Meline Bizard, Angela Brisebarre, Flora Donati, Etienne Simon-Lorière, Vincent Enouf, Maud Vanpeene, Sylvie van der Werf  
EPI\_ISL\_428357 hCoV-19/France/IDF2253/2020 Europe / France / Ile De France / Garches 2020-03-11  
Institut Médico légal- Hop R. Poincaré National Reference Center for Viruses of Respiratory Infections, Institut Pasteur, Paris Mélanie Albert, Marion Barbet, Sylvie Behillil, Meline Bizard, Angela Brisebarre, Flora Donati, Etienne Simon-Lorière, Vincent Enouf, Maud Vanpeene, Sylvie van der Werf  
EPI\_ISL\_428358 hCoV-19/France/HF3598/2020 Europe / France / Hauts De France / Chateau-thierry 2020-03-24  
CH Jeanne de Navarre Laboratoire de Biologie National Reference Center for Viruses of Respiratory Infections, Institut Pasteur, Paris Mélanie Albert, Marion Barbet, Sylvie Behillil, Meline Bizard, Angela Brisebarre, Flora Donati, Etienne Simon-Lorière, Vincent Enouf, Maud Vanpeene, Sylvie van der Werf  
EPI\_ISL\_428359 hCoV-19/France/HF3677/2020 Europe / France / Hauts De France / Compiègne 2020-03-23  
CH Compiègne Laboratoire de Biologie National Reference Center for Viruses of Respiratory Infections, Institut Pasteur, Paris Mélanie Albert, Marion Barbet, Sylvie Behillil, Meline Bizard, Angela Brisebarre, Flora Donati, Etienne Simon-Lorière, Vincent Enouf, Maud Vanpeene, Sylvie van der Werf  
EPI\_ISL\_428360 hCoV-19/France/HF3678/2020 Europe / France / Hauts De France / Compiègne 2020-03-25  
CH Compiègne Laboratoire de Biologie National Reference Center for Viruses of Respiratory Infections, Institut Pasteur, Paris Mélanie Albert, Marion Barbet, Sylvie Behillil, Meline Bizard, Angela Brisebarre, Flora Donati, Etienne Simon-Lorière, Vincent Enouf, Maud Vanpeene, Sylvie van der Werf  
EPI\_ISL\_428361 hCoV-19/France/IDF3703/2020 Europe / France / Ile De France / Longjumeau 2020-03-25  
LABM GH nord Essonne de Longjumeau - BP 125 National Reference Center for Viruses of Respiratory Infections, Institut Pasteur, Paris Mélanie Albert, Marion Barbet, Sylvie Behillil, Meline Bizard, Angela Brisebarre, Flora Donati, Etienne Simon-Lorière, Vincent Enouf, Maud Vanpeene, Sylvie van der Werf  
EPI\_ISL\_428363 hCoV-19/France/IDF3745/2020 Europe / France / Ile De France / Orsay 2020-03-26 GH Nord  
Essonne Service de Biologie clinique National Reference Center for Viruses of Respiratory Infections, Institut Pasteur, Paris Mélanie Albert, Marion Barbet, Sylvie Behillil, Meline Bizard, Angela Brisebarre, Flora Donati, Etienne Simon-Lorière, Vincent Enouf, Maud Vanpeene, Sylvie van der Werf  
EPI\_ISL\_428365 hCoV-19/France/IDF3930/2020 Europe / France / Ile De France / Longjumeau 2020-03-26  
LABM GH nord Essonne de Longjumeau - BP 125 National Reference Center for Viruses of Respiratory Infections, Institut Pasteur, Paris Mélanie Albert, Marion Barbet, Sylvie Behillil, Meline Bizard, Angela Brisebarre, Flora Donati, Etienne Simon-Lorière, Vincent Enouf, Maud Vanpeene, Sylvie van der Werf  
EPI\_ISL\_428366 hCoV-19/France/HF4220/2020 Europe / France / Hauts De France / Chateau-thierry 2020-03-30  
CH Jeanne de Navarre Laboratoire de Biologie National Reference Center for Viruses of Respiratory Infections, Institut Pasteur, Paris Mélanie Albert, Marion Barbet, Sylvie Behillil, Meline Bizard, Angela Brisebarre, Flora Donati, Etienne Simon-Lorière, Vincent Enouf, Maud Vanpeene, Sylvie van der Werf  
EPI\_ISL\_428367 hCoV-19/France/N4427/2020 Europe / France / Normandie / Carentan 2020-03-23 Cabinet  
Médical National Reference Center for Viruses of Respiratory Infections, Institut Pasteur, Paris Mélanie Albert, Marion Barbet, Sylvie Behillil, Meline Bizard, Angela Brisebarre, Flora Donati, Etienne Simon-Lorière, Vincent Enouf, Maud Vanpeene, Sylvie van der Werf

|                |                                  |                                   |            |                                                                                                                                             |
|----------------|----------------------------------|-----------------------------------|------------|---------------------------------------------------------------------------------------------------------------------------------------------|
| EPI_ISL_428368 | hCoV-19/Turkey/GLAB-CoV013/2020  | Europe / Turkey / Istanbul        | 2020-04-16 | Genomic Laboratory (GLAB) (Conjoint lab of Health Directorate of Istanbul and Istanbul Technical University)                                |
| EPI_ISL_428385 | hCoV-19/USA/CT-Yale-066/2020     | North America / USA / Connecticut | 2020-04-04 | Yale COVID-19 Biorepository Grubaugh Lab - Yale School of Public Health                                                                     |
| EPI_ISL_429350 | hCoV-19/Denmark/ALAB-SSI121/2020 | Europe / Denmark / Unknown        | 2020-03-08 | Department of Virus and Microbiological Special Diagnostics, Statens Serum Institut, Copenhagen, Denmark, Artillerivej 5, 2300 Copenhagen S |
| EPI_ISL_429351 | hCoV-19/Denmark/ALAB-SSI122/2020 | Europe / Denmark / Unknown        | 2020-03-08 | Department of Virus and Microbiological Special Diagnostics, Statens Serum Institut, Copenhagen, Denmark, Artillerivej 5, 2300 Copenhagen S |
| EPI_ISL_429352 | hCoV-19/Denmark/ALAB-SSI123/2020 | Europe / Denmark / Unknown        | 2020-03-08 | Department of Virus and Microbiological Special Diagnostics, Statens Serum Institut, Copenhagen, Denmark, Artillerivej 5, 2300 Copenhagen S |
| EPI_ISL_429354 | hCoV-19/Denmark/ALAB-SSI126/2020 | Europe / Denmark / Unknown        | 2020-03-08 | Department of Virus and Microbiological Special Diagnostics, Statens Serum Institut, Copenhagen, Denmark, Artillerivej 5, 2300 Copenhagen S |
| EPI_ISL_429370 | hCoV-19/Denmark/ALAB-SSI154/2020 | Europe / Denmark / Unknown        | 2020-03-09 | Department of Virus and Microbiological Special Diagnostics, Statens Serum Institut, Copenhagen, Denmark, Artillerivej 5, 2300 Copenhagen S |
| EPI_ISL_429371 | hCoV-19/Denmark/ALAB-SSI155/2020 | Europe / Denmark / Unknown        | 2020-03-10 | Department of Virus and Microbiological Special Diagnostics, Statens Serum Institut, Copenhagen, Denmark, Artillerivej 5, 2300 Copenhagen S |
| EPI_ISL_429372 | hCoV-19/Denmark/ALAB-SSI156/2020 | Europe / Denmark / Unknown        | 2020-03-10 | Department of Virus and Microbiological Special Diagnostics, Statens Serum Institut, Copenhagen, Denmark, Artillerivej 5, 2300 Copenhagen S |
| EPI_ISL_429373 | hCoV-19/Denmark/ALAB-SSI157/2020 | Europe / Denmark / Unknown        | 2020-03-09 | Department of Virus and Microbiological Special Diagnostics, Statens Serum Institut, Copenhagen, Denmark, Artillerivej 5, 2300 Copenhagen S |
| EPI_ISL_429374 | hCoV-19/Denmark/ALAB-SSI158/2020 | Europe / Denmark / Unknown        | 2020-03-09 | Department of Virus and Microbiological Special Diagnostics, Statens Serum Institut, Copenhagen, Denmark, Artillerivej 5, 2300 Copenhagen S |
| EPI_ISL_429375 | hCoV-19/Denmark/ALAB-SSI159/2020 | Europe / Denmark / Unknown        | 2020-03-09 | Department of Virus and Microbiological Special Diagnostics, Statens Serum Institut, Copenhagen, Denmark, Artillerivej 5, 2300 Copenhagen S |
| EPI_ISL_429376 | hCoV-19/Denmark/ALAB-SSI160/2020 | Europe / Denmark / Unknown        | 2020-03-09 | Department of Virus and Microbiological Special Diagnostics, Statens Serum Institut, Copenhagen, Denmark, Artillerivej 5, 2300 Copenhagen S |
| EPI_ISL_429377 | hCoV-19/Denmark/ALAB-SSI162/2020 | Europe / Denmark / Unknown        | 2020-03-09 | Department of Virus and Microbiological Special Diagnostics, Statens Serum Institut, Copenhagen, Denmark, Artillerivej 5, 2300 Copenhagen S |
| EPI_ISL_429378 | hCoV-19/Denmark/ALAB-SSI163/2020 | Europe / Denmark / Unknown        | 2020-03-09 | Department of Virus and Microbiological Special Diagnostics, Statens Serum Institut, Copenhagen, Denmark, Artillerivej 5, 2300 Copenhagen S |
| EPI_ISL_429379 | hCoV-19/Denmark/ALAB-SSI164/2020 | Europe / Denmark / Unknown        | 2020-03-09 | Department of Virus and Microbiological Special Diagnostics, Statens Serum Institut, Copenhagen, Denmark, Artillerivej 5, 2300 Copenhagen S |
| EPI_ISL_429381 | hCoV-19/Denmark/ALAB-SSI167/2020 | Europe / Denmark / Unknown        | 2020-03-09 | Department of Virus and Microbiological Special Diagnostics, Statens Serum Institut, Copenhagen, Denmark, Artillerivej 5, 2300 Copenhagen S |







|                                                                                               |                                                                                                                                                                                                                                                                                                                                                                                                                                                                                                                                                                                                                                               |                                            |            |                                                                                                              |
|-----------------------------------------------------------------------------------------------|-----------------------------------------------------------------------------------------------------------------------------------------------------------------------------------------------------------------------------------------------------------------------------------------------------------------------------------------------------------------------------------------------------------------------------------------------------------------------------------------------------------------------------------------------------------------------------------------------------------------------------------------------|--------------------------------------------|------------|--------------------------------------------------------------------------------------------------------------|
| EPI_ISL_429652                                                                                | hCoV-19/USA/WA-UW-5164/2020                                                                                                                                                                                                                                                                                                                                                                                                                                                                                                                                                                                                                   | North America / USA / Washington           | 2020-04-02 | UW                                                                                                           |
| Virology Lab                                                                                  | UW Virology Lab Pavitra Roychoudhury, Hong Xie, Keith Jerome, Alexander Greninger                                                                                                                                                                                                                                                                                                                                                                                                                                                                                                                                                             |                                            |            |                                                                                                              |
| EPI_ISL_429653                                                                                | hCoV-19/USA/WA-UW-5166/2020                                                                                                                                                                                                                                                                                                                                                                                                                                                                                                                                                                                                                   | North America / USA / Washington           | 2020-04-02 | UW                                                                                                           |
| Virology Lab                                                                                  | UW Virology Lab Pavitra Roychoudhury, Hong Xie, Keith Jerome, Alexander Greninger                                                                                                                                                                                                                                                                                                                                                                                                                                                                                                                                                             |                                            |            |                                                                                                              |
| EPI_ISL_429654                                                                                | hCoV-19/USA/WA-UW-5169/2020                                                                                                                                                                                                                                                                                                                                                                                                                                                                                                                                                                                                                   | North America / USA / Washington           | 2020-04-02 | UW                                                                                                           |
| Virology Lab                                                                                  | UW Virology Lab Pavitra Roychoudhury, Hong Xie, Keith Jerome, Alexander Greninger                                                                                                                                                                                                                                                                                                                                                                                                                                                                                                                                                             |                                            |            |                                                                                                              |
| EPI_ISL_429655                                                                                | hCoV-19/USA/WA-UW-5170/2020                                                                                                                                                                                                                                                                                                                                                                                                                                                                                                                                                                                                                   | North America / USA / Washington           | 2020-04-02 | UW                                                                                                           |
| Virology Lab                                                                                  | UW Virology Lab Pavitra Roychoudhury, Hong Xie, Keith Jerome, Alexander Greninger                                                                                                                                                                                                                                                                                                                                                                                                                                                                                                                                                             |                                            |            |                                                                                                              |
| EPI_ISL_429656                                                                                | hCoV-19/USA/UN-UW-5172/2020                                                                                                                                                                                                                                                                                                                                                                                                                                                                                                                                                                                                                   | North America / USA                        | 2020-04-02 | UW Virology Lab UW                                                                                           |
| Virology Lab                                                                                  | Pavitra Roychoudhury, Hong Xie, Keith Jerome, Alexander Greninger                                                                                                                                                                                                                                                                                                                                                                                                                                                                                                                                                                             |                                            |            |                                                                                                              |
| EPI_ISL_429667                                                                                | hCoV-19/Brazil/CV4/2020                                                                                                                                                                                                                                                                                                                                                                                                                                                                                                                                                                                                                       | South America / Brazil / Minas gerais      | 2020-03-09 | Central Public Health Laboratory/Octávio Magalhães Institute (IOM) from the Ezequiel Dias Foundation (FUNED) |
| Health Laboratory/Octávio Magalhães Institute (IOM) from the Ezequiel Dias Foundation (FUNED) | Instituto Octávio Magalhães / Fundação Ezequiel Dias (IOM/Funed) Talita Adelino, Joilson Xavier, Marta Giovanetti, Vagner Fonseca, Marcos Vinícius Silva, Luiz Carlos Junior Alcantara, Marluce Aparecida Assunção Oliveira                                                                                                                                                                                                                                                                                                                                                                                                                   |                                            |            |                                                                                                              |
| EPI_ISL_429669                                                                                | hCoV-19/Brazil/CV6/2020                                                                                                                                                                                                                                                                                                                                                                                                                                                                                                                                                                                                                       | South America / Brazil / Minas gerais      | 2020-03-13 | Central Public Health Laboratory/Octávio Magalhães Institute (IOM) from the Ezequiel Dias Foundation (FUNED) |
| Health Laboratory/Octávio Magalhães Institute (IOM) from the Ezequiel Dias Foundation (FUNED) | Instituto Octávio Magalhães / Fundação Ezequiel Dias (IOM/Funed) Talita Adelino, Joilson Xavier, Marta Giovanetti, Vagner Fonseca, Marcos Vinícius Silva, Luiz Carlos Junior Alcantara, Marluce Aparecida Assunção Oliveira                                                                                                                                                                                                                                                                                                                                                                                                                   |                                            |            |                                                                                                              |
| EPI_ISL_429676                                                                                | hCoV-19/Brazil/CV16/2020                                                                                                                                                                                                                                                                                                                                                                                                                                                                                                                                                                                                                      | South America / Brazil / Minas gerais      | 2020-03-16 | Central Public Health Laboratory/Octávio Magalhães Institute (IOM) from the Ezequiel Dias Foundation (FUNED) |
| Instituto Octávio Magalhães / Fundação Ezequiel Dias (IOM/Funed)                              | Instituto Octávio Magalhães / Fundação Ezequiel Dias (IOM/Funed) Talita Adelino, Joilson Xavier, Marta Giovanetti, Vagner Fonseca, Marcos Vinícius Silva, Luiz Carlos Junior Alcantara, Marluce Aparecida Assunção Oliveira                                                                                                                                                                                                                                                                                                                                                                                                                   |                                            |            |                                                                                                              |
| EPI_ISL_429681                                                                                | hCoV-19/Brazil/CV21/2020                                                                                                                                                                                                                                                                                                                                                                                                                                                                                                                                                                                                                      | South America / Brazil / Minas gerais      | 2020-03-16 | Central Public Health Laboratory/Octávio Magalhães Institute (IOM) from the Ezequiel Dias Foundation (FUNED) |
| Instituto Octávio Magalhães / Fundação Ezequiel Dias (IOM/Funed)                              | Instituto Octávio Magalhães / Fundação Ezequiel Dias (IOM/Funed) Talita Adelino, Joilson Xavier, Marta Giovanetti, Vagner Fonseca, Marcos Vinícius Silva, Luiz Carlos Junior Alcantara, Marluce Aparecida Assunção Oliveira                                                                                                                                                                                                                                                                                                                                                                                                                   |                                            |            |                                                                                                              |
| EPI_ISL_429687                                                                                | hCoV-19/Brazil/CV31/2020                                                                                                                                                                                                                                                                                                                                                                                                                                                                                                                                                                                                                      | South America / Brazil / Minas gerais      | 2020-03-17 | Central Public Health Laboratory/Octávio Magalhães Institute (IOM) from the Ezequiel Dias Foundation (FUNED) |
| Instituto Octávio Magalhães / Fundação Ezequiel Dias (IOM/Funed)                              | Instituto Octávio Magalhães / Fundação Ezequiel Dias (IOM/Funed) Talita Adelino, Joilson Xavier, Marta Giovanetti, Vagner Fonseca, Marcos Vinícius Silva, Luiz Carlos Junior Alcantara, Marluce Aparecida Assunção Oliveira                                                                                                                                                                                                                                                                                                                                                                                                                   |                                            |            |                                                                                                              |
| EPI_ISL_429688                                                                                | hCoV-19/Brazil/CV32/2020                                                                                                                                                                                                                                                                                                                                                                                                                                                                                                                                                                                                                      | South America / Brazil / Minas gerais      | 2020-03-17 | Central Public Health Laboratory/Octávio Magalhães Institute (IOM) from the Ezequiel Dias Foundation (FUNED) |
| Instituto Octávio Magalhães / Fundação Ezequiel Dias (IOM/Funed)                              | Instituto Octávio Magalhães / Fundação Ezequiel Dias (IOM/Funed) Talita Adelino, Joilson Xavier, Marta Giovanetti, Vagner Fonseca, Marcos Vinícius Silva, Luiz Carlos Junior Alcantara, Marluce Aparecida Assunção Oliveira                                                                                                                                                                                                                                                                                                                                                                                                                   |                                            |            |                                                                                                              |
| EPI_ISL_429695                                                                                | hCoV-19/Brazil/CV42/2020                                                                                                                                                                                                                                                                                                                                                                                                                                                                                                                                                                                                                      | South America / Brazil / Minas gerais      | 2020-03-20 | Central Public Health Laboratory/Octávio Magalhães Institute (IOM) from the Ezequiel Dias Foundation (FUNED) |
| Instituto Octávio Magalhães / Fundação Ezequiel Dias (IOM/Funed)                              | Instituto Octávio Magalhães / Fundação Ezequiel Dias (IOM/Funed) Talita Adelino, Joilson Xavier, Marta Giovanetti, Vagner Fonseca, Marcos Vinícius Silva, Luiz Carlos Junior Alcantara, Marluce Aparecida Assunção Oliveira                                                                                                                                                                                                                                                                                                                                                                                                                   |                                            |            |                                                                                                              |
| EPI_ISL_430333                                                                                | hCoV-19/USA/NY-NYUMC306/2020                                                                                                                                                                                                                                                                                                                                                                                                                                                                                                                                                                                                                  | North America / USA / New York / Brooklyn  | 2020-03-30 | NYU Langone Health                                                                                           |
| Departments of Pathology and Medicine, New York University School of Medicine                 | Maria Aguero-Rosenfeld, Brendan Belovarac, Margaret Black, Ludovic Boytard, John Cadley, Paolo Cotzia, John Chen, Dacia Dimartino, Xiaojun Feng, Tatyana Gindin, Emily Guzman, Adriana Heguy, Megan Hogan, Emily Huang, George Jour, Lawrence H. Lin, Raven Luther, Andrew Lytle, Christian Marier, Matthew T. Maurano, Mark J. Mulligan, Peter Meyn, Raquel Ordonez Ciriza, Iman Osman, Jared Pinnell, Vanessa Raabe, Sitharam Ramaswami, Amy Rapkiewicz, Andre M. Ribeiro-dos-Santos, Marie Samanovic-Golden, Antonio Serrano, Guomiao Shen, Matija Snuderl, Theodore Vougiouklakis, Nick Vulpescu, Gael Westby, Paul Zappile, Yutong Zhang |                                            |            |                                                                                                              |
| EPI_ISL_430334                                                                                | hCoV-19/USA/NY-NYUMC307/2020                                                                                                                                                                                                                                                                                                                                                                                                                                                                                                                                                                                                                  | North America / USA / New York / Brooklyn  | 2020-03-30 | NYU Langone Health                                                                                           |
| Departments of Pathology and Medicine, New York University School of Medicine                 | Maria Aguero-Rosenfeld, Brendan Belovarac, Margaret Black, Ludovic Boytard, John Cadley, Paolo Cotzia, John Chen, Dacia Dimartino, Xiaojun Feng, Tatyana Gindin, Emily Guzman, Adriana Heguy, Megan Hogan, Emily Huang, George Jour, Lawrence H. Lin, Raven Luther, Andrew Lytle, Christian Marier, Matthew T. Maurano, Mark J. Mulligan, Peter Meyn, Raquel Ordonez Ciriza, Iman Osman, Jared Pinnell, Vanessa Raabe, Sitharam Ramaswami, Amy Rapkiewicz, Andre M. Ribeiro-dos-Santos, Marie Samanovic-Golden, Antonio Serrano, Guomiao Shen, Matija Snuderl, Theodore Vougiouklakis, Nick Vulpescu, Gael Westby, Paul Zappile, Yutong Zhang |                                            |            |                                                                                                              |
| EPI_ISL_430335                                                                                | hCoV-19/USA/NY-NYUMC308/2020                                                                                                                                                                                                                                                                                                                                                                                                                                                                                                                                                                                                                  | North America / USA / New York / Brooklyn  | 2020-03-30 | NYU Langone Health                                                                                           |
| Departments of Pathology and Medicine, New York University School of Medicine                 | Maria Aguero-Rosenfeld, Brendan Belovarac, Margaret Black, Ludovic Boytard, John Cadley, Paolo Cotzia, John Chen, Dacia Dimartino, Xiaojun Feng, Tatyana Gindin, Emily Guzman, Adriana Heguy, Megan Hogan, Emily Huang, George Jour, Lawrence H. Lin, Raven Luther, Andrew Lytle, Christian Marier, Matthew T. Maurano, Mark J. Mulligan, Peter Meyn, Raquel Ordonez Ciriza, Iman Osman, Jared Pinnell, Vanessa Raabe, Sitharam Ramaswami, Amy Rapkiewicz, Andre M. Ribeiro-dos-Santos, Marie Samanovic-Golden, Antonio Serrano, Guomiao Shen, Matija Snuderl, Theodore Vougiouklakis, Nick Vulpescu, Gael Westby, Paul Zappile, Yutong Zhang |                                            |            |                                                                                                              |
| EPI_ISL_430336                                                                                | hCoV-19/USA/NY-NYUMC309/2020                                                                                                                                                                                                                                                                                                                                                                                                                                                                                                                                                                                                                  | North America / USA / New York / Manhattan | 2020-03-30 | NYU Langone Health                                                                                           |
| Departments of Pathology and Medicine, New York University School of Medicine                 | Maria Aguero-Rosenfeld, Brendan Belovarac, Margaret Black, Ludovic Boytard, John Cadley, Paolo Cotzia, John Chen,                                                                                                                                                                                                                                                                                                                                                                                                                                                                                                                             |                                            |            |                                                                                                              |

Dacia Dimartino, Xiaojun Feng, Tatyana Gindin, Emily Guzman, Adriana Heguy, Megan Hogan, Emily Huang, George Jour, Lawrence H. Lin, Raven Luther, Andrew Lytle, Christian Marier, Matthew T. Maurano, Mark J. Mulligan, Peter Meyn, Raquel Ordonez Ciriza, Iman Osman, Jared Pinnell, Vanessa Raabe, Sitharam Ramaswami, Amy Rapkiewicz, Andre M. Ribeiro-dos-Santos, Marie Samanovic-Golden, Antonio Serrano, Guomiao Shen, Matija Snuderl, Theodore Vougiouklakis, Nick Vulpescu, Gael Westby, Paul Zappile, Yutong Zhang  
EPI\_ISL\_430337 hCoV-19/USA/NY-NYUMC310/2020 North America / USA / New York / Manhattan 2020-03-30  
NYU Langone Health Departments of Pathology and Medicine, New York University School of Medicine Maria Aguerro-Rosenfeld, Brendan Belovarac, Margaret Black, Ludovic Boytard, John Cadley, Paolo Cotzia, John Chen, Dacia Dimartino, Xiaojun Feng, Tatyana Gindin, Emily Guzman, Adriana Heguy, Megan Hogan, Emily Huang, George Jour, Lawrence H. Lin, Raven Luther, Andrew Lytle, Christian Marier, Matthew T. Maurano, Mark J. Mulligan, Peter Meyn, Raquel Ordonez Ciriza, Iman Osman, Jared Pinnell, Vanessa Raabe, Sitharam Ramaswami, Amy Rapkiewicz, Andre M. Ribeiro-dos-Santos, Marie Samanovic-Golden, Antonio Serrano, Guomiao Shen, Matija Snuderl, Theodore Vougiouklakis, Nick Vulpescu, Gael Westby, Paul Zappile, Yutong Zhang  
EPI\_ISL\_430338 hCoV-19/USA/NY-NYUMC311/2020 North America / USA / New York / Manhattan 2020-03-30  
NYU Langone Health Departments of Pathology and Medicine, New York University School of Medicine Maria Aguerro-Rosenfeld, Brendan Belovarac, Margaret Black, Ludovic Boytard, John Cadley, Paolo Cotzia, John Chen, Dacia Dimartino, Xiaojun Feng, Tatyana Gindin, Emily Guzman, Adriana Heguy, Megan Hogan, Emily Huang, George Jour, Lawrence H. Lin, Raven Luther, Andrew Lytle, Christian Marier, Matthew T. Maurano, Mark J. Mulligan, Peter Meyn, Raquel Ordonez Ciriza, Iman Osman, Jared Pinnell, Vanessa Raabe, Sitharam Ramaswami, Amy Rapkiewicz, Andre M. Ribeiro-dos-Santos, Marie Samanovic-Golden, Antonio Serrano, Guomiao Shen, Matija Snuderl, Theodore Vougiouklakis, Nick Vulpescu, Gael Westby, Paul Zappile, Yutong Zhang  
EPI\_ISL\_430339 hCoV-19/USA/NY-NYUMC312/2020 North America / USA / New York / Manhattan 2020-03-30  
NYU Langone Health Departments of Pathology and Medicine, New York University School of Medicine Maria Aguerro-Rosenfeld, Brendan Belovarac, Margaret Black, Ludovic Boytard, John Cadley, Paolo Cotzia, John Chen, Dacia Dimartino, Xiaojun Feng, Tatyana Gindin, Emily Guzman, Adriana Heguy, Megan Hogan, Emily Huang, George Jour, Lawrence H. Lin, Raven Luther, Andrew Lytle, Christian Marier, Matthew T. Maurano, Mark J. Mulligan, Peter Meyn, Raquel Ordonez Ciriza, Iman Osman, Jared Pinnell, Vanessa Raabe, Sitharam Ramaswami, Amy Rapkiewicz, Andre M. Ribeiro-dos-Santos, Marie Samanovic-Golden, Antonio Serrano, Guomiao Shen, Matija Snuderl, Theodore Vougiouklakis, Nick Vulpescu, Gael Westby, Paul Zappile, Yutong Zhang  
EPI\_ISL\_430343 hCoV-19/USA/NY-NYUMC316/2020 North America / USA / New York / Manhattan 2020-03-30  
NYU Langone Health Departments of Pathology and Medicine, New York University School of Medicine Maria Aguerro-Rosenfeld, Brendan Belovarac, Margaret Black, Ludovic Boytard, John Cadley, Paolo Cotzia, John Chen, Dacia Dimartino, Xiaojun Feng, Tatyana Gindin, Emily Guzman, Adriana Heguy, Megan Hogan, Emily Huang, George Jour, Lawrence H. Lin, Raven Luther, Andrew Lytle, Christian Marier, Matthew T. Maurano, Mark J. Mulligan, Peter Meyn, Raquel Ordonez Ciriza, Iman Osman, Jared Pinnell, Vanessa Raabe, Sitharam Ramaswami, Amy Rapkiewicz, Andre M. Ribeiro-dos-Santos, Marie Samanovic-Golden, Antonio Serrano, Guomiao Shen, Matija Snuderl, Theodore Vougiouklakis, Nick Vulpescu, Gael Westby, Paul Zappile, Yutong Zhang  
EPI\_ISL\_430355 hCoV-19/USA/NY-NYUMC328/2020 North America / USA / New York / Nassau County 2020-04-02  
NYU Langone Health Departments of Pathology and Medicine, New York University School of Medicine Maria Aguerro-Rosenfeld, Brendan Belovarac, Margaret Black, Ludovic Boytard, John Cadley, Paolo Cotzia, John Chen, Dacia Dimartino, Xiaojun Feng, Tatyana Gindin, Emily Guzman, Adriana Heguy, Megan Hogan, Emily Huang, George Jour, Lawrence H. Lin, Raven Luther, Andrew Lytle, Christian Marier, Matthew T. Maurano, Mark J. Mulligan, Peter Meyn, Raquel Ordonez Ciriza, Iman Osman, Jared Pinnell, Vanessa Raabe, Sitharam Ramaswami, Amy Rapkiewicz, Andre M. Ribeiro-dos-Santos, Marie Samanovic-Golden, Antonio Serrano, Guomiao Shen, Matija Snuderl, Theodore Vougiouklakis, Nick Vulpescu, Gael Westby, Paul Zappile, Yutong Zhang  
EPI\_ISL\_430356 hCoV-19/USA/NJ-NYUMC329/2020 North America / USA / New Jersey / Bergen County 2020-04-02  
NYU Langone Health Departments of Pathology and Medicine, New York University School of Medicine Maria Aguerro-Rosenfeld, Brendan Belovarac, Margaret Black, Ludovic Boytard, John Cadley, Paolo Cotzia, John Chen, Dacia Dimartino, Xiaojun Feng, Tatyana Gindin, Emily Guzman, Adriana Heguy, Megan Hogan, Emily Huang, George Jour, Lawrence H. Lin, Raven Luther, Andrew Lytle, Christian Marier, Matthew T. Maurano, Mark J. Mulligan, Peter Meyn, Raquel Ordonez Ciriza, Iman Osman, Jared Pinnell, Vanessa Raabe, Sitharam Ramaswami, Amy Rapkiewicz, Andre M. Ribeiro-dos-Santos, Marie Samanovic-Golden, Antonio Serrano, Guomiao Shen, Matija Snuderl, Theodore Vougiouklakis, Nick Vulpescu, Gael Westby, Paul Zappile, Yutong Zhang  
EPI\_ISL\_430357 hCoV-19/USA/NY-NYUMC330/2020 North America / USA / New York / Brooklyn 2020-04-03  
NYU Langone Health Departments of Pathology and Medicine, New York University School of Medicine Maria Aguerro-Rosenfeld, Brendan Belovarac, Margaret Black, Ludovic Boytard, John Cadley, Paolo Cotzia, John Chen, Dacia Dimartino, Xiaojun Feng, Tatyana Gindin, Emily Guzman, Adriana Heguy, Megan Hogan, Emily Huang, George Jour, Lawrence H. Lin, Raven Luther, Andrew Lytle, Christian Marier, Matthew T. Maurano, Mark J. Mulligan, Peter Meyn, Raquel Ordonez Ciriza, Iman Osman, Jared Pinnell, Vanessa Raabe, Sitharam Ramaswami, Amy Rapkiewicz, Andre M. Ribeiro-dos-Santos, Marie Samanovic-Golden, Antonio Serrano, Guomiao Shen, Matija Snuderl, Theodore Vougiouklakis, Nick Vulpescu, Gael Westby, Paul Zappile, Yutong Zhang  
EPI\_ISL\_430358 hCoV-19/USA/NY-NYUMC331/2020 North America / USA / New York / Manhattan 2020-04-13  
NYU Langone Health Departments of Pathology and Medicine, New York University School of Medicine Maria Aguerro-Rosenfeld, Brendan Belovarac, Margaret Black, Ludovic Boytard, John Cadley, Paolo Cotzia, John Chen, Dacia Dimartino, Xiaojun Feng, Tatyana Gindin, Emily Guzman, Adriana Heguy, Megan Hogan, Emily Huang, George Jour, Lawrence H. Lin, Raven Luther, Andrew Lytle, Christian Marier, Matthew T. Maurano, Mark J. Mulligan, Peter Meyn, Raquel Ordonez Ciriza, Iman Osman, Jared Pinnell, Vanessa Raabe, Sitharam Ramaswami, Amy Rapkiewicz, Andre M. Ribeiro-dos-Santos, Marie Samanovic-Golden, Antonio Serrano, Guomiao Shen, Matija Snuderl, Theodore Vougiouklakis, Nick Vulpescu, Gael Westby, Paul Zappile, Yutong Zhang  
EPI\_ISL\_430359 hCoV-19/USA/NY-NYUMC332/2020 North America / USA / New York / Brooklyn 2020-04-08

NYU Langone Health Departments of Pathology and Medicine, New York University School of Medicine Maria Aguerro-Rosenfeld, Brendan Belovarac, Margaret Black, Ludovic Boytard, John Cadley, Paolo Cotzia, John Chen, Dacia Dimartino, Xiaojun Feng, Tatyana Gindin, Emily Guzman, Adriana Heguy, Megan Hogan, Emily Huang, George Jour, Lawrence H. Lin, Raven Luther, Andrew Lytle, Christian Marier, Matthew T. Maurano, Mark J. Mulligan, Peter Meyn, Raquel Ordonez Ciriza, Iman Osman, Jared Pinnell, Vanessa Raabe, Sitharam Ramaswami, Amy Rapkiewicz, Andre M. Ribeiro-dos-Santos, Marie Samanovic-Golden, Antonio Serrano, Guomiao Shen, Matija Snuderl, Theodore Vougiouklakis, Nick Vulpescu, Gael Westby, Paul Zappile, Yutong Zhang  
EPI\_ISL\_430360 hCoV-19/USA/NY-NYUMC333/2020 North America / USA / New York / Queens 2020-04-07 NYU  
NYU Langone Health Departments of Pathology and Medicine, New York University School of Medicine Maria Aguerro-Rosenfeld, Brendan Belovarac, Margaret Black, Ludovic Boytard, John Cadley, Paolo Cotzia, John Chen, Dacia Dimartino, Xiaojun Feng, Tatyana Gindin, Emily Guzman, Adriana Heguy, Megan Hogan, Emily Huang, George Jour, Lawrence H. Lin, Raven Luther, Andrew Lytle, Christian Marier, Matthew T. Maurano, Mark J. Mulligan, Peter Meyn, Raquel Ordonez Ciriza, Iman Osman, Jared Pinnell, Vanessa Raabe, Sitharam Ramaswami, Amy Rapkiewicz, Andre M. Ribeiro-dos-Santos, Marie Samanovic-Golden, Antonio Serrano, Guomiao Shen, Matija Snuderl, Theodore Vougiouklakis, Nick Vulpescu, Gael Westby, Paul Zappile, Yutong Zhang  
EPI\_ISL\_430361 hCoV-19/USA/NY-NYUMC334/2020 North America / USA / New York / Brooklyn 2020-04-07  
NYU Langone Health Departments of Pathology and Medicine, New York University School of Medicine Maria Aguerro-Rosenfeld, Brendan Belovarac, Margaret Black, Ludovic Boytard, John Cadley, Paolo Cotzia, John Chen, Dacia Dimartino, Xiaojun Feng, Tatyana Gindin, Emily Guzman, Adriana Heguy, Megan Hogan, Emily Huang, George Jour, Lawrence H. Lin, Raven Luther, Andrew Lytle, Christian Marier, Matthew T. Maurano, Mark J. Mulligan, Peter Meyn, Raquel Ordonez Ciriza, Iman Osman, Jared Pinnell, Vanessa Raabe, Sitharam Ramaswami, Amy Rapkiewicz, Andre M. Ribeiro-dos-Santos, Marie Samanovic-Golden, Antonio Serrano, Guomiao Shen, Matija Snuderl, Theodore Vougiouklakis, Nick Vulpescu, Gael Westby, Paul Zappile, Yutong Zhang  
EPI\_ISL\_430362 hCoV-19/USA/NY-NYUMC335/2020 North America / USA / New York / Brooklyn 2020-04-08  
NYU Langone Health Departments of Pathology and Medicine, New York University School of Medicine Maria Aguerro-Rosenfeld, Brendan Belovarac, Margaret Black, Ludovic Boytard, John Cadley, Paolo Cotzia, John Chen, Dacia Dimartino, Xiaojun Feng, Tatyana Gindin, Emily Guzman, Adriana Heguy, Megan Hogan, Emily Huang, George Jour, Lawrence H. Lin, Raven Luther, Andrew Lytle, Christian Marier, Matthew T. Maurano, Mark J. Mulligan, Peter Meyn, Raquel Ordonez Ciriza, Iman Osman, Jared Pinnell, Vanessa Raabe, Sitharam Ramaswami, Amy Rapkiewicz, Andre M. Ribeiro-dos-Santos, Marie Samanovic-Golden, Antonio Serrano, Guomiao Shen, Matija Snuderl, Theodore Vougiouklakis, Nick Vulpescu, Gael Westby, Paul Zappile, Yutong Zhang  
EPI\_ISL\_430363 hCoV-19/USA/NY-NYUMC336/2020 North America / USA / New York / Brooklyn 2020-04-08  
NYU Langone Health Departments of Pathology and Medicine, New York University School of Medicine Maria Aguerro-Rosenfeld, Brendan Belovarac, Margaret Black, Ludovic Boytard, John Cadley, Paolo Cotzia, John Chen, Dacia Dimartino, Xiaojun Feng, Tatyana Gindin, Emily Guzman, Adriana Heguy, Megan Hogan, Emily Huang, George Jour, Lawrence H. Lin, Raven Luther, Andrew Lytle, Christian Marier, Matthew T. Maurano, Mark J. Mulligan, Peter Meyn, Raquel Ordonez Ciriza, Iman Osman, Jared Pinnell, Vanessa Raabe, Sitharam Ramaswami, Amy Rapkiewicz, Andre M. Ribeiro-dos-Santos, Marie Samanovic-Golden, Antonio Serrano, Guomiao Shen, Matija Snuderl, Theodore Vougiouklakis, Nick Vulpescu, Gael Westby, Paul Zappile, Yutong Zhang  
EPI\_ISL\_430364 hCoV-19/USA/NY-NYUMC337/2020 North America / USA / New York / Brooklyn 2020-04-08  
NYU Langone Health Departments of Pathology and Medicine, New York University School of Medicine Maria Aguerro-Rosenfeld, Brendan Belovarac, Margaret Black, Ludovic Boytard, John Cadley, Paolo Cotzia, John Chen, Dacia Dimartino, Xiaojun Feng, Tatyana Gindin, Emily Guzman, Adriana Heguy, Megan Hogan, Emily Huang, George Jour, Lawrence H. Lin, Raven Luther, Andrew Lytle, Christian Marier, Matthew T. Maurano, Mark J. Mulligan, Peter Meyn, Raquel Ordonez Ciriza, Iman Osman, Jared Pinnell, Vanessa Raabe, Sitharam Ramaswami, Amy Rapkiewicz, Andre M. Ribeiro-dos-Santos, Marie Samanovic-Golden, Antonio Serrano, Guomiao Shen, Matija Snuderl, Theodore Vougiouklakis, Nick Vulpescu, Gael Westby, Paul Zappile, Yutong Zhang  
EPI\_ISL\_430365 hCoV-19/USA/NY-NYUMC338/2020 North America / USA / New York / Brooklyn 2020-04-08  
NYU Langone Health Departments of Pathology and Medicine, New York University School of Medicine Maria Aguerro-Rosenfeld, Brendan Belovarac, Margaret Black, Ludovic Boytard, John Cadley, Paolo Cotzia, John Chen, Dacia Dimartino, Xiaojun Feng, Tatyana Gindin, Emily Guzman, Adriana Heguy, Megan Hogan, Emily Huang, George Jour, Lawrence H. Lin, Raven Luther, Andrew Lytle, Christian Marier, Matthew T. Maurano, Mark J. Mulligan, Peter Meyn, Raquel Ordonez Ciriza, Iman Osman, Jared Pinnell, Vanessa Raabe, Sitharam Ramaswami, Amy Rapkiewicz, Andre M. Ribeiro-dos-Santos, Marie Samanovic-Golden, Antonio Serrano, Guomiao Shen, Matija Snuderl, Theodore Vougiouklakis, Nick Vulpescu, Gael Westby, Paul Zappile, Yutong Zhang  
EPI\_ISL\_430366 hCoV-19/USA/NY-NYUMC339/2020 North America / USA / New York / Brooklyn 2020-04-08  
NYU Langone Health Departments of Pathology and Medicine, New York University School of Medicine Maria Aguerro-Rosenfeld, Brendan Belovarac, Margaret Black, Ludovic Boytard, John Cadley, Paolo Cotzia, John Chen, Dacia Dimartino, Xiaojun Feng, Tatyana Gindin, Emily Guzman, Adriana Heguy, Megan Hogan, Emily Huang, George Jour, Lawrence H. Lin, Raven Luther, Andrew Lytle, Christian Marier, Matthew T. Maurano, Mark J. Mulligan, Peter Meyn, Raquel Ordonez Ciriza, Iman Osman, Jared Pinnell, Vanessa Raabe, Sitharam Ramaswami, Amy Rapkiewicz, Andre M. Ribeiro-dos-Santos, Marie Samanovic-Golden, Antonio Serrano, Guomiao Shen, Matija Snuderl, Theodore Vougiouklakis, Nick Vulpescu, Gael Westby, Paul Zappile, Yutong Zhang  
EPI\_ISL\_430367 hCoV-19/USA/NY-NYUMC340/2020 North America / USA / New York / Brooklyn 2020-04-07  
NYU Langone Health Departments of Pathology and Medicine, New York University School of Medicine Maria Aguerro-Rosenfeld, Brendan Belovarac, Margaret Black, Ludovic Boytard, John Cadley, Paolo Cotzia, John Chen, Dacia Dimartino, Xiaojun Feng, Tatyana Gindin, Emily Guzman, Adriana Heguy, Megan Hogan, Emily Huang, George Jour, Lawrence H. Lin, Raven Luther, Andrew Lytle, Christian Marier, Matthew T. Maurano, Mark J. Mulligan, Peter Meyn, Raquel Ordonez Ciriza, Iman Osman, Jared Pinnell, Vanessa Raabe, Sitharam Ramaswami, Amy Rapkiewicz, Andre M. Ribeiro-dos-Santos, Marie Samanovic-Golden, Antonio Serrano, Guomiao Shen, Matija Snuderl,

Theodore Vougiouklakis, Nick Vulpescu, Gael Westby, Paul Zappile, Yutong Zhang  
EPI\_ISL\_430368 hCoV-19/USA/NY-NYUMC341/2020 North America / USA / New York / Brooklyn 2020-04-08  
NYU Langone Health Departments of Pathology and Medicine, New York University School of Medicine Maria  
Aguero-Rosenfeld, Brendan Belovarac, Margaret Black, Ludovic Boytard, John Cadley, Paolo Cotzia, John Chen,  
Dacia Dimartino, Xiaojun Feng, Tatyana Gindin, Emily Guzman, Adriana Heguy, Megan Hogan, Emily Huang, George  
Jour, Lawrence H. Lin, Raven Luther, Andrew Lytle, Christian Marier, Matthew T. Maurano, Mark J. Mulligan,  
Peter Meyn, Raquel Ordonez Ciriza, Iman Osman, Jared Pinnell, Vanessa Raabe, Sitharam Ramaswami, Amy  
Rapkiewicz, Andre M. Ribeiro-dos-Santos, Marie Samanovic-Golden, Antonio Serrano, Guomiao Shen, Matija Snuderl,  
Theodore Vougiouklakis, Nick Vulpescu, Gael Westby, Paul Zappile, Yutong Zhang  
EPI\_ISL\_430369 hCoV-19/USA/NY-NYUMC342/2020 North America / USA / New York / Manhattan 2020-04-08  
NYU Langone Health Departments of Pathology and Medicine, New York University School of Medicine Maria  
Aguero-Rosenfeld, Brendan Belovarac, Margaret Black, Ludovic Boytard, John Cadley, Paolo Cotzia, John Chen,  
Dacia Dimartino, Xiaojun Feng, Tatyana Gindin, Emily Guzman, Adriana Heguy, Megan Hogan, Emily Huang, George  
Jour, Lawrence H. Lin, Raven Luther, Andrew Lytle, Christian Marier, Matthew T. Maurano, Mark J. Mulligan,  
Peter Meyn, Raquel Ordonez Ciriza, Iman Osman, Jared Pinnell, Vanessa Raabe, Sitharam Ramaswami, Amy  
Rapkiewicz, Andre M. Ribeiro-dos-Santos, Marie Samanovic-Golden, Antonio Serrano, Guomiao Shen, Matija Snuderl,  
Theodore Vougiouklakis, Nick Vulpescu, Gael Westby, Paul Zappile, Yutong Zhang  
EPI\_ISL\_430370 hCoV-19/USA/NY-NYUMC343/2020 North America / USA / New York / Queens 2020-04-08 NYU  
Langone Health Departments of Pathology and Medicine, New York University School of Medicine Maria Aguero-  
Rosenfeld, Brendan Belovarac, Margaret Black, Ludovic Boytard, John Cadley, Paolo Cotzia, John Chen, Dacia  
Dimartino, Xiaojun Feng, Tatyana Gindin, Emily Guzman, Adriana Heguy, Megan Hogan, Emily Huang, George Jour,  
Lawrence H. Lin, Raven Luther, Andrew Lytle, Christian Marier, Matthew T. Maurano, Mark J. Mulligan, Peter  
Meyn, Raquel Ordonez Ciriza, Iman Osman, Jared Pinnell, Vanessa Raabe, Sitharam Ramaswami, Amy Rapkiewicz,  
Andre M. Ribeiro-dos-Santos, Marie Samanovic-Golden, Antonio Serrano, Guomiao Shen, Matija Snuderl, Theodore  
Vougiouklakis, Nick Vulpescu, Gael Westby, Paul Zappile, Yutong Zhang  
EPI\_ISL\_430371 hCoV-19/USA/NJ-NYUMC344/2020 North America / USA / New Jersey / Hudson County 2020-  
04-08 NYU Langone Health Departments of Pathology and Medicine, New York University School of Medicine  
Maria Aguero-Rosenfeld, Brendan Belovarac, Margaret Black, Ludovic Boytard, John Cadley, Paolo Cotzia, John  
Chen, Dacia Dimartino, Xiaojun Feng, Tatyana Gindin, Emily Guzman, Adriana Heguy, Megan Hogan, Emily Huang,  
George Jour, Lawrence H. Lin, Raven Luther, Andrew Lytle, Christian Marier, Matthew T. Maurano, Mark J.  
Mulligan, Peter Meyn, Raquel Ordonez Ciriza, Iman Osman, Jared Pinnell, Vanessa Raabe, Sitharam Ramaswami, Amy  
Rapkiewicz, Andre M. Ribeiro-dos-Santos, Marie Samanovic-Golden, Antonio Serrano, Guomiao Shen, Matija Snuderl,  
Theodore Vougiouklakis, Nick Vulpescu, Gael Westby, Paul Zappile, Yutong Zhang  
EPI\_ISL\_430372 hCoV-19/USA/NY-NYUMC345/2020 North America / USA / New York / Brooklyn 2020-04-07  
NYU Langone Health Departments of Pathology and Medicine, New York University School of Medicine Maria  
Aguero-Rosenfeld, Brendan Belovarac, Margaret Black, Ludovic Boytard, John Cadley, Paolo Cotzia, John Chen,  
Dacia Dimartino, Xiaojun Feng, Tatyana Gindin, Emily Guzman, Adriana Heguy, Megan Hogan, Emily Huang, George  
Jour, Lawrence H. Lin, Raven Luther, Andrew Lytle, Christian Marier, Matthew T. Maurano, Mark J. Mulligan,  
Peter Meyn, Raquel Ordonez Ciriza, Iman Osman, Jared Pinnell, Vanessa Raabe, Sitharam Ramaswami, Amy  
Rapkiewicz, Andre M. Ribeiro-dos-Santos, Marie Samanovic-Golden, Antonio Serrano, Guomiao Shen, Matija Snuderl,  
Theodore Vougiouklakis, Nick Vulpescu, Gael Westby, Paul Zappile, Yutong Zhang  
EPI\_ISL\_430373 hCoV-19/USA/NY-NYUMC346/2020 North America / USA / New York / Brooklyn 2020-04-08  
NYU Langone Health Departments of Pathology and Medicine, New York University School of Medicine Maria  
Aguero-Rosenfeld, Brendan Belovarac, Margaret Black, Ludovic Boytard, John Cadley, Paolo Cotzia, John Chen,  
Dacia Dimartino, Xiaojun Feng, Tatyana Gindin, Emily Guzman, Adriana Heguy, Megan Hogan, Emily Huang, George  
Jour, Lawrence H. Lin, Raven Luther, Andrew Lytle, Christian Marier, Matthew T. Maurano, Mark J. Mulligan,  
Peter Meyn, Raquel Ordonez Ciriza, Iman Osman, Jared Pinnell, Vanessa Raabe, Sitharam Ramaswami, Amy  
Rapkiewicz, Andre M. Ribeiro-dos-Santos, Marie Samanovic-Golden, Antonio Serrano, Guomiao Shen, Matija Snuderl,  
Theodore Vougiouklakis, Nick Vulpescu, Gael Westby, Paul Zappile, Yutong Zhang  
EPI\_ISL\_430374 hCoV-19/USA/NY-NYUMC347/2020 North America / USA / New York / Brooklyn 2020-04-08  
NYU Langone Health Departments of Pathology and Medicine, New York University School of Medicine Maria  
Aguero-Rosenfeld, Brendan Belovarac, Margaret Black, Ludovic Boytard, John Cadley, Paolo Cotzia, John Chen,  
Dacia Dimartino, Xiaojun Feng, Tatyana Gindin, Emily Guzman, Adriana Heguy, Megan Hogan, Emily Huang, George  
Jour, Lawrence H. Lin, Raven Luther, Andrew Lytle, Christian Marier, Matthew T. Maurano, Mark J. Mulligan,  
Peter Meyn, Raquel Ordonez Ciriza, Iman Osman, Jared Pinnell, Vanessa Raabe, Sitharam Ramaswami, Amy  
Rapkiewicz, Andre M. Ribeiro-dos-Santos, Marie Samanovic-Golden, Antonio Serrano, Guomiao Shen, Matija Snuderl,  
Theodore Vougiouklakis, Nick Vulpescu, Gael Westby, Paul Zappile, Yutong Zhang  
EPI\_ISL\_430375 hCoV-19/USA/NY-NYUMC348/2020 North America / USA / New York / Brooklyn 2020-04-08  
NYU Langone Health Departments of Pathology and Medicine, New York University School of Medicine Maria  
Aguero-Rosenfeld, Brendan Belovarac, Margaret Black, Ludovic Boytard, John Cadley, Paolo Cotzia, John Chen,  
Dacia Dimartino, Xiaojun Feng, Tatyana Gindin, Emily Guzman, Adriana Heguy, Megan Hogan, Emily Huang, George  
Jour, Lawrence H. Lin, Raven Luther, Andrew Lytle, Christian Marier, Matthew T. Maurano, Mark J. Mulligan,  
Peter Meyn, Raquel Ordonez Ciriza, Iman Osman, Jared Pinnell, Vanessa Raabe, Sitharam Ramaswami, Amy  
Rapkiewicz, Andre M. Ribeiro-dos-Santos, Marie Samanovic-Golden, Antonio Serrano, Guomiao Shen, Matija Snuderl,  
Theodore Vougiouklakis, Nick Vulpescu, Gael Westby, Paul Zappile, Yutong Zhang  
EPI\_ISL\_430376 hCoV-19/USA/NY-NYUMC349/2020 North America / USA / New York / Brooklyn 2020-04-08  
NYU Langone Health Departments of Pathology and Medicine, New York University School of Medicine Maria  
Aguero-Rosenfeld, Brendan Belovarac, Margaret Black, Ludovic Boytard, John Cadley, Paolo Cotzia, John Chen,  
Dacia Dimartino, Xiaojun Feng, Tatyana Gindin, Emily Guzman, Adriana Heguy, Megan Hogan, Emily Huang, George  
Jour, Lawrence H. Lin, Raven Luther, Andrew Lytle, Christian Marier, Matthew T. Maurano, Mark J. Mulligan,

Peter Meyn, Raquel Ordonez Ciriza, Iman Osman, Jared Pinnell, Vanessa Raabe, Sitharam Ramaswami, Amy Rapkiewicz, Andre M. Ribeiro-dos-Santos, Marie Samanovic-Golden, Antonio Serrano, Guomiao Shen, Matija Snuderl, Theodore Vougiouklakis, Nick Vulpescu, Gael Westby, Paul Zappile, Yutong Zhang

|                                                                                                                                                                                                                                                                                          |                                |                                          |            |                                 |
|------------------------------------------------------------------------------------------------------------------------------------------------------------------------------------------------------------------------------------------------------------------------------------------|--------------------------------|------------------------------------------|------------|---------------------------------|
| EPI_ISL_430600                                                                                                                                                                                                                                                                           | hCoV-19/Australia/VIC1134/2020 | Oceania / Australia / Victoria           | 2020-04-08 | Victorian                       |
| Infectious Diseases Reference Laboratory (VIDRL) Microbiological Diagnostic Unit Public Health Laboratory and Victorian Infectious Diseases Reference Laboratory, The Peter Doherty Institute for Infection and Immunity Caly L., Seemann T., Sait, M., Schultz M., Druce J., Sherry, N. |                                |                                          |            |                                 |
| EPI_ISL_430601                                                                                                                                                                                                                                                                           | hCoV-19/Australia/VIC1135/2020 | Oceania / Australia / Victoria           | 2020-04-08 | Victorian                       |
| Infectious Diseases Reference Laboratory (VIDRL) Microbiological Diagnostic Unit Public Health Laboratory and Victorian Infectious Diseases Reference Laboratory, The Peter Doherty Institute for Infection and Immunity Caly L., Seemann T., Sait, M., Schultz M., Druce J., Sherry, N. |                                |                                          |            |                                 |
| EPI_ISL_430602                                                                                                                                                                                                                                                                           | hCoV-19/Australia/VIC1158/2020 | Oceania / Australia / Victoria           | 2020-04-09 | Victorian                       |
| Infectious Diseases Reference Laboratory (VIDRL) Microbiological Diagnostic Unit Public Health Laboratory and Victorian Infectious Diseases Reference Laboratory, The Peter Doherty Institute for Infection and Immunity Caly L., Seemann T., Sait, M., Schultz M., Druce J., Sherry, N. |                                |                                          |            |                                 |
| EPI_ISL_430604                                                                                                                                                                                                                                                                           | hCoV-19/Australia/VIC1159/2020 | Oceania / Australia / Victoria           | 2020-04-09 | Victorian                       |
| Infectious Diseases Reference Laboratory (VIDRL) Microbiological Diagnostic Unit Public Health Laboratory and Victorian Infectious Diseases Reference Laboratory, The Peter Doherty Institute for Infection and Immunity Caly L., Seemann T., Sait, M., Schultz M., Druce J., Sherry, N. |                                |                                          |            |                                 |
| EPI_ISL_430605                                                                                                                                                                                                                                                                           | hCoV-19/Australia/VIC1160/2020 | Oceania / Australia / Victoria           | 2020-04-09 | Victorian                       |
| Infectious Diseases Reference Laboratory (VIDRL) Microbiological Diagnostic Unit Public Health Laboratory and Victorian Infectious Diseases Reference Laboratory, The Peter Doherty Institute for Infection and Immunity Caly L., Seemann T., Sait, M., Schultz M., Druce J., Sherry, N. |                                |                                          |            |                                 |
| EPI_ISL_430607                                                                                                                                                                                                                                                                           | hCoV-19/Australia/VIC1137/2020 | Oceania / Australia / Victoria           | 2020-04-08 | Victorian                       |
| Infectious Diseases Reference Laboratory (VIDRL) Microbiological Diagnostic Unit Public Health Laboratory and Victorian Infectious Diseases Reference Laboratory, The Peter Doherty Institute for Infection and Immunity Caly L., Seemann T., Sait, M., Schultz M., Druce J., Sherry, N. |                                |                                          |            |                                 |
| EPI_ISL_430609                                                                                                                                                                                                                                                                           | hCoV-19/Australia/VIC1138/2020 | Oceania / Australia / Victoria           | 2020-04-08 | Victorian                       |
| Infectious Diseases Reference Laboratory (VIDRL) Microbiological Diagnostic Unit Public Health Laboratory and Victorian Infectious Diseases Reference Laboratory, The Peter Doherty Institute for Infection and Immunity Caly L., Seemann T., Sait, M., Schultz M., Druce J., Sherry, N. |                                |                                          |            |                                 |
| EPI_ISL_430610                                                                                                                                                                                                                                                                           | hCoV-19/Australia/VIC1139/2020 | Oceania / Australia / Victoria           | 2020-04-08 | Victorian                       |
| Infectious Diseases Reference Laboratory (VIDRL) Microbiological Diagnostic Unit Public Health Laboratory and Victorian Infectious Diseases Reference Laboratory, The Peter Doherty Institute for Infection and Immunity Caly L., Seemann T., Sait, M., Schultz M., Druce J., Sherry, N. |                                |                                          |            |                                 |
| EPI_ISL_430614                                                                                                                                                                                                                                                                           | hCoV-19/Australia/VIC1143/2020 | Oceania / Australia / Victoria           | 2020-04-08 | Victorian                       |
| Infectious Diseases Reference Laboratory (VIDRL) Microbiological Diagnostic Unit Public Health Laboratory and Victorian Infectious Diseases Reference Laboratory, The Peter Doherty Institute for Infection and Immunity Caly L., Seemann T., Sait, M., Schultz M., Druce J., Sherry, N. |                                |                                          |            |                                 |
| EPI_ISL_430615                                                                                                                                                                                                                                                                           | hCoV-19/Australia/VIC1161/2020 | Oceania / Australia / Victoria           | 2020-04-09 | Victorian                       |
| Infectious Diseases Reference Laboratory (VIDRL) Microbiological Diagnostic Unit Public Health Laboratory and Victorian Infectious Diseases Reference Laboratory, The Peter Doherty Institute for Infection and Immunity Caly L., Seemann T., Sait, M., Schultz M., Druce J., Sherry, N. |                                |                                          |            |                                 |
| EPI_ISL_430616                                                                                                                                                                                                                                                                           | hCoV-19/Australia/VIC1162/2020 | Oceania / Australia / Victoria           | 2020-04-09 | Victorian                       |
| Infectious Diseases Reference Laboratory (VIDRL) Microbiological Diagnostic Unit Public Health Laboratory and Victorian Infectious Diseases Reference Laboratory, The Peter Doherty Institute for Infection and Immunity Caly L., Seemann T., Sait, M., Schultz M., Druce J., Sherry, N. |                                |                                          |            |                                 |
| EPI_ISL_430618                                                                                                                                                                                                                                                                           | hCoV-19/Australia/VIC1109/2020 | Oceania / Australia / Victoria           | 2020-04-07 | Victorian                       |
| Infectious Diseases Reference Laboratory (VIDRL) Microbiological Diagnostic Unit Public Health Laboratory and Victorian Infectious Diseases Reference Laboratory, The Peter Doherty Institute for Infection and Immunity Caly L., Seemann T., Sait, M., Schultz M., Druce J., Sherry, N. |                                |                                          |            |                                 |
| EPI_ISL_430619                                                                                                                                                                                                                                                                           | hCoV-19/Australia/VIC1144/2020 | Oceania / Australia / Victoria           | 2020-04-08 | Victorian                       |
| Infectious Diseases Reference Laboratory (VIDRL) Microbiological Diagnostic Unit Public Health Laboratory and Victorian Infectious Diseases Reference Laboratory, The Peter Doherty Institute for Infection and Immunity Caly L., Seemann T., Sait, M., Schultz M., Druce J., Sherry, N. |                                |                                          |            |                                 |
| EPI_ISL_430623                                                                                                                                                                                                                                                                           | hCoV-19/Australia/VIC1174/2020 | Oceania / Australia / Victoria           | 2020-04-10 | Victorian                       |
| Infectious Diseases Reference Laboratory (VIDRL) Microbiological Diagnostic Unit Public Health Laboratory and Victorian Infectious Diseases Reference Laboratory, The Peter Doherty Institute for Infection and Immunity Caly L., Seemann T., Sait, M., Schultz M., Druce J., Sherry, N. |                                |                                          |            |                                 |
| EPI_ISL_430632                                                                                                                                                                                                                                                                           | hCoV-19/Australia/NT29/2020    | Oceania / Australia / Northern Territory | 2020       | Royal Darwin Hospital Pathology |
| Microbiological Diagnostic Unit Public Health Laboratory and Victorian Infectious Diseases Reference Laboratory, The Peter Doherty Institute for Infection and Immunity Meumann, E., Caly L., Seemann T., Sait, M., Schultz M., Druce J., Sherry, N.                                     |                                |                                          |            |                                 |
| EPI_ISL_430633                                                                                                                                                                                                                                                                           | hCoV-19/Australia/NT30/2020    | Oceania / Australia / Northern Territory | 2020       | Royal Darwin Hospital Pathology |
| Microbiological Diagnostic Unit Public Health Laboratory and Victorian Infectious Diseases Reference Laboratory, The Peter Doherty Institute for Infection and Immunity Meumann, E., Caly L., Seemann T., Sait, M., Schultz M., Druce J., Sherry, N.                                     |                                |                                          |            |                                 |
| EPI_ISL_430635                                                                                                                                                                                                                                                                           | hCoV-19/Australia/NT31/2020    | Oceania / Australia / Northern Territory | 2020       | Royal Darwin Hospital Pathology |
| Microbiological Diagnostic Unit Public Health Laboratory and Victorian Infectious Diseases Reference Laboratory, The Peter Doherty Institute for Infection and Immunity                                                                                                                  |                                |                                          |            |                                 |



|                                                                |                                                                                                                                                                                                                 |                                                                                                                                                                                                                                                            |            |                                           |
|----------------------------------------------------------------|-----------------------------------------------------------------------------------------------------------------------------------------------------------------------------------------------------------------|------------------------------------------------------------------------------------------------------------------------------------------------------------------------------------------------------------------------------------------------------------|------------|-------------------------------------------|
| Seemann T., Schultz M., Sait, M., Sherry, N.<br>EPI_ISL_430682 | hCoV-19/Australia/VIC1334/2020<br>Diagnostic Unit Public Health Laboratory                                                                                                                                      | Oceania / Australia / Victoria<br>Microbiological Diagnostic Unit Public Health Laboratory                                                                                                                                                                 | 2020-04-13 | Microbiological                           |
| Seemann T., Schultz M., Sait, M., Sherry, N.<br>EPI_ISL_430683 | hCoV-19/Australia/VIC1342/2020<br>Diagnostic Unit Public Health Laboratory                                                                                                                                      | Oceania / Australia / Victoria<br>Microbiological Diagnostic Unit Public Health Laboratory                                                                                                                                                                 | 2020-04-14 | Microbiological                           |
| Seemann T., Schultz M., Sait, M., Sherry, N.<br>EPI_ISL_430684 | hCoV-19/Australia/VIC1343/2020<br>Diagnostic Unit Public Health Laboratory                                                                                                                                      | Oceania / Australia / Victoria<br>Microbiological Diagnostic Unit Public Health Laboratory                                                                                                                                                                 | 2020-04-14 | Microbiological                           |
| Seemann T., Schultz M., Sait, M., Sherry, N.<br>EPI_ISL_430686 | hCoV-19/Australia/VIC1340/2020<br>Diagnostic Unit Public Health Laboratory                                                                                                                                      | Oceania / Australia / Victoria<br>Microbiological Diagnostic Unit Public Health Laboratory                                                                                                                                                                 | 2020-04-13 | Microbiological                           |
| Seemann T., Schultz M., Sait, M., Sherry, N.<br>EPI_ISL_430689 | hCoV-19/Australia/VIC1315/2020<br>Infectious Diseases Reference Laboratory (VIDRL)<br>Laboratory and Victorian Infectious Diseases Reference Laboratory, The Peter Doherty Institute for Infection and Immunity | Oceania / Australia / Victoria<br>Microbiological Diagnostic Unit Public Health Laboratory, The Peter Doherty Institute for Infection and Immunity                                                                                                         | 2020-04-11 | Victorian                                 |
| EPI_ISL_430690                                                 | hCoV-19/Australia/VIC1316/2020<br>Infectious Diseases Reference Laboratory (VIDRL)<br>Laboratory and Victorian Infectious Diseases Reference Laboratory, The Peter Doherty Institute for Infection and Immunity | Oceania / Australia / Victoria<br>Microbiological Diagnostic Unit Public Health Laboratory, The Peter Doherty Institute for Infection and Immunity                                                                                                         | 2020-04-11 | Victorian                                 |
| EPI_ISL_430691                                                 | hCoV-19/Australia/VIC1317/2020<br>Infectious Diseases Reference Laboratory (VIDRL)<br>Laboratory and Victorian Infectious Diseases Reference Laboratory, The Peter Doherty Institute for Infection and Immunity | Oceania / Australia / Victoria<br>Microbiological Diagnostic Unit Public Health Laboratory, The Peter Doherty Institute for Infection and Immunity                                                                                                         | 2020-04-11 | Victorian                                 |
| EPI_ISL_430693                                                 | hCoV-19/Australia/VIC1318/2020<br>Infectious Diseases Reference Laboratory (VIDRL)<br>Laboratory and Victorian Infectious Diseases Reference Laboratory, The Peter Doherty Institute for Infection and Immunity | Oceania / Australia / Victoria<br>Microbiological Diagnostic Unit Public Health Laboratory, The Peter Doherty Institute for Infection and Immunity                                                                                                         | 2020-04-11 | Victorian                                 |
| EPI_ISL_430694                                                 | hCoV-19/Australia/VIC1303/2020<br>Infectious Diseases Reference Laboratory (VIDRL)<br>Laboratory and Victorian Infectious Diseases Reference Laboratory, The Peter Doherty Institute for Infection and Immunity | Oceania / Australia / Victoria<br>Microbiological Diagnostic Unit Public Health Laboratory, The Peter Doherty Institute for Infection and Immunity                                                                                                         | 2020-04-10 | Victorian                                 |
| EPI_ISL_430695                                                 | hCoV-19/Australia/VIC1328/2020<br>Infectious Diseases Reference Laboratory (VIDRL)<br>Laboratory and Victorian Infectious Diseases Reference Laboratory, The Peter Doherty Institute for Infection and Immunity | Oceania / Australia / Victoria<br>Microbiological Diagnostic Unit Public Health Laboratory, The Peter Doherty Institute for Infection and Immunity                                                                                                         | 2020-04-12 | Victorian                                 |
| EPI_ISL_430696                                                 | hCoV-19/Australia/VIC1329/2020<br>Infectious Diseases Reference Laboratory (VIDRL)<br>Laboratory and Victorian Infectious Diseases Reference Laboratory, The Peter Doherty Institute for Infection and Immunity | Oceania / Australia / Victoria<br>Microbiological Diagnostic Unit Public Health Laboratory, The Peter Doherty Institute for Infection and Immunity                                                                                                         | 2020-04-12 | Victorian                                 |
| EPI_ISL_430697                                                 | hCoV-19/Australia/VIC1344/2020<br>Infectious Diseases Reference Laboratory (VIDRL)<br>Laboratory and Victorian Infectious Diseases Reference Laboratory, The Peter Doherty Institute for Infection and Immunity | Oceania / Australia / Victoria<br>Microbiological Diagnostic Unit Public Health Laboratory, The Peter Doherty Institute for Infection and Immunity                                                                                                         | 2020-04-14 | Victorian                                 |
| EPI_ISL_430698                                                 | hCoV-19/Australia/VIC1336/2020<br>Infectious Diseases Reference Laboratory (VIDRL)<br>Laboratory and Victorian Infectious Diseases Reference Laboratory, The Peter Doherty Institute for Infection and Immunity | Oceania / Australia / Victoria<br>Microbiological Diagnostic Unit Public Health Laboratory, The Peter Doherty Institute for Infection and Immunity                                                                                                         | 2020-04-13 | Victorian                                 |
| EPI_ISL_406798                                                 | hCoV-19/Wuhan/WH01/2019<br>Central Theater Command of People's Liberation Army of China                                                                                                                         | Asia / China / Hubei / Wuhan<br>BGI & Institute of Microbiology, Chinese Academy of Sciences & Shandong First Medical University & Shandong Academy of Medical Sciences & General Hospital of Central Theater Command of People's Liberation Army of China | 2019-12-26 | General Hospital of                       |
| EPI_ISL_407976                                                 | hCoV-19/Belgium/GHB-03021/2020<br>Clinical and Epidemiological Virology                                                                                                                                         | Europe / Belgium / Leuven<br>KU Leuven, Clinical and Epidemiological Virology                                                                                                                                                                              | 2020-02-03 | KU Leuven,<br>Bert                        |
| EPI_ISL_407987                                                 | hCoV-19/Singapore/2/2020<br>Hospital                                                                                                                                                                            | Asia / Singapore<br>Programme in Emerging Infectious Diseases, Duke-NUS Medical School                                                                                                                                                                     | 2020-01-25 | Singapore General<br>Danielle E Anderson, |
| EPI_ISL_407988                                                 | hCoV-19/Singapore/3/2020<br>Infectious Diseases                                                                                                                                                                 | Asia / Singapore<br>Programme in Emerging Infectious Diseases, Duke-NUS Medical School                                                                                                                                                                     | 2020-02-01 | National Centre for<br>Danielle E         |
| EPI_ISL_412459                                                 | hCoV-19/Jingzhou/HBCDC-HB-01/2020<br>Jingzhou Center for Disease Control and Prevention                                                                                                                         | Asia / China / Hubei / Jingzhou<br>Hubei Provincial Center for Disease Control and Prevention                                                                                                                                                              | 2020-01-08 |                                           |
| EPI_ISL_413729                                                 | hCoV-19/China/WF0015/2020                                                                                                                                                                                       | Asia / China<br>Weifang Center for Disease Control and                                                                                                                                                                                                     | 2020-02    |                                           |

Prevention Center for Disease Control and Prevention & BGI-Shenzhen Qing Nie, Xingguang Li, Erik M Volz, Han Fu, Haowei Wang, Xiaoyue Xi, Wei Chen, Dehui Liu, Yingying Chen, Mengmeng Tian, Wei Tan, Junjie Zai, Wanying Sun, Jiandong Li, Junhua Li

EPI\_ISL\_413746 hCoV-19/China/WF0016/2020 Asia / China 2020-02 Weifang Center for Disease Control and Prevention Weifang Center for Disease Control and Prevention & BGI-Shenzhen Qing Nie, Xingguang Li, Erik M Volz, Han Fu, Haowei Wang, Xiaoyue Xi, Wei Chen, Dehui Liu, Yingying Chen, Mengmeng Tian, Wei Tan, Junjie Zai, Wanying Sun, Jiandong Li, Junhua Li

EPI\_ISL\_413748 hCoV-19/China/WF0018/2020 Asia / China 2020-02 Weifang Center for Disease Control and Prevention Weifang Center for Disease Control and Prevention & BGI-Shenzhen Qing Nie, Xingguang Li, Erik M Volz, Han Fu, Haowei Wang, Xiaoyue Xi, Wei Chen, Dehui Liu, Yingying Chen, Mengmeng Tian, Wei Tan, Junjie Zai, Wanying Sun, Jiandong Li, Junhua Li

EPI\_ISL\_413749 hCoV-19/China/WF0019/2020 Asia / China 2020-02 Weifang Center for Disease Control and Prevention Weifang Center for Disease Control and Prevention & BGI-Shenzhen Qing Nie, Xingguang Li, Erik M Volz, Han Fu, Haowei Wang, Xiaoyue Xi, Wei Chen, Dehui Liu, Yingying Chen, Mengmeng Tian, Wei Tan, Junjie Zai, Wanying Sun, Jiandong Li, Junhua Li

EPI\_ISL\_413750 hCoV-19/China/WF0020/2020 Asia / China 2020-02 Weifang Center for Disease Control and Prevention Weifang Center for Disease Control and Prevention & BGI-Shenzhen Qing Nie, Xingguang Li, Erik M Volz, Han Fu, Haowei Wang, Xiaoyue Xi, Wei Chen, Dehui Liu, Yingying Chen, Mengmeng Tian, Wei Tan, Junjie Zai, Wanying Sun, Jiandong Li, Junhua Li

EPI\_ISL\_413751 hCoV-19/China/WF0021/2020 Asia / China 2020-02 Weifang Center for Disease Control and Prevention Weifang Center for Disease Control and Prevention & BGI-Shenzhen Qing Nie, Xingguang Li, Erik M Volz, Han Fu, Haowei Wang, Xiaoyue Xi, Wei Chen, Dehui Liu, Yingying Chen, Mengmeng Tian, Wei Tan, Junjie Zai, Wanying Sun, Jiandong Li, Junhua Li

EPI\_ISL\_413753 hCoV-19/China/WF0024/2020 Asia / China 2020-02 Weifang Center for Disease Control and Prevention Weifang Center for Disease Control and Prevention & BGI-Shenzhen Qing Nie, Xingguang Li, Erik M Volz, Han Fu, Haowei Wang, Xiaoyue Xi, Wei Chen, Dehui Liu, Yingying Chen, Mengmeng Tian, Wei Tan, Junjie Zai, Wanying Sun, Jiandong Li, Junhua Li

EPI\_ISL\_413761 hCoV-19/China/WF0026/2020 Asia / China 2020-02 Weifang Center for Disease Control and Prevention Weifang Center for Disease Control and Prevention & BGI-Shenzhen Qing Nie, Xingguang Li, Erik M Volz, Han Fu, Haowei Wang, Xiaoyue Xi, Wei Chen, Dehui Liu, Yingying Chen, Mengmeng Tian, Wei Tan, Junjie Zai, Wanying Sun, Jiandong Li, Junhua Li

EPI\_ISL\_413791 hCoV-19/China/WF0028/2020 Asia / China 2020-02 Weifang Center for Disease Control and Prevention Weifang Center for Disease Control and Prevention & BGI-Shenzhen Qing Nie, Xingguang Li, Erik M Volz, Han Fu, Haowei Wang, Xiaoyue Xi, Wei Chen, Dehui Liu, Yingying Chen, Mengmeng Tian, Wei Tan, Junjie Zai, Wanying Sun, Jiandong Li, Junhua Li

EPI\_ISL\_413809 hCoV-19/China/WF0029/2020 Asia / China 2020-02 Weifang Center for Disease Control and Prevention Weifang Center for Disease Control and Prevention & BGI-Shenzhen Qing Nie, Xingguang Li, Erik M Volz, Han Fu, Haowei Wang, Xiaoyue Xi, Wei Chen, Dehui Liu, Yingying Chen, Mengmeng Tian, Wei Tan, Junjie Zai, Wanying Sun, Jiandong Li, Junhua Li

EPI\_ISL\_413924 hCoV-19/USA/CA-CDPH-UC6/2020 North America / USA / California / Grand Princess cruise ship 2020-03-05 California Department of Public Health Chiu Laboratory, University of California, San Francisco Xianding Deng, Scot Federman, Chao-Yang Pan, Hugo Guevara, Wei Gu, Debra A. Wadford, and Charles Y. Chiu

EPI\_ISL\_413925 hCoV-19/USA/CA-CDPH-UC7/2020 North America / USA / California / Grand Princess cruise ship 2020-03-05 California Department of Public Health Chiu Laboratory, University of California, San Francisco Xianding Deng, Scot Federman, Chao-Yang Pan, Hugo Guevara, Wei Gu, Debra A. Wadford, and Charles Y. Chiu

EPI\_ISL\_413928 hCoV-19/USA/CA-CDPH-UC9/2020 North America / USA / California / Grand Princess cruise ship 2020-03-05 California Department of Public Health Chiu Laboratory, University of California, San Francisco Xianding Deng, Scot Federman, Chao-Yang Pan, Hugo Guevara, Wei Gu, Debra A. Wadford, and Charles Y. Chiu

EPI\_ISL\_413931 hCoV-19/USA/CA-CDPH-UC11/2020 North America / USA / California / Grand Princess cruise ship 2020-03-05 California Department of Public Health Chiu Laboratory, University of California, San Francisco Xianding Deng, Scot Federman, Chao-Yang Pan, Hugo Guevara, Wei Gu, Debra A. Wadford, and Charles Y. Chiu

EPI\_ISL\_416024 hCoV-19/Wales/PHW35/2020 Europe / United Kingdom / Wales 2020-03-11 Wales Specialist Virology Centre Public Health Wales Microbiology Cardiff Catherine Moore, Joanne Watkins, Sally Corden, Tom Connor

EPI\_ISL\_416026 hCoV-19/Wales/PHW21/2020 Europe / United Kingdom / Wales 2020-03-11 Wales Specialist Virology Centre Public Health Wales Microbiology Cardiff Catherine Moore, Joanne Watkins, Sally Corden, Tom Connor

EPI\_ISL\_416028 hCoV-19/Brazil/SPBR-07/2020 South America / Brazil / Sao Paulo / Sao Paulo 2020-03-03 National Influenza Center - Instituto Adolfo Lutz Instituto Adolfo Lutz, Interdisciplinary Procedures Center, Strategic Laboratory Claudio Tavares Sacchi, Claudia Regina Gonçalves, Carlos Henrique Camargo, Fabiana Cristina Pereira dos Santos, Daniela Bernardes Borges da Silva, Simone Guadagnucci Morillo, Adriano Abbud, Adriana Bugno, Maria do Carmo Sampaio Tavares Timenetsky, Terezinha Maria de Paiva

EPI\_ISL\_416029 hCoV-19/Brazil/SPBR-08/2020 South America / Brazil / Sao Paulo / Sao Paulo 2020-03-04 Laboratório Fleury Instituto Adolfo Lutz, Interdisciplinary Procedures Center, Strategic Laboratory Claudio Tavares Sacchi, Claudia Regina Gonçalves, Carlos Henrique Camargo, Fabiana Cristina Pereira dos Santos, Daniela Bernardes Borges da Silva, Simone Guadagnucci Morillo, Adriano Abbud, Adriana Bugno, Maria do Carmo Sampaio



|                                                                                                                                                                                                                                                                                                                                                                                                                                                |                                  |                                                      |            |                                                                                                                                                                                                                                                                                                                                                  |
|------------------------------------------------------------------------------------------------------------------------------------------------------------------------------------------------------------------------------------------------------------------------------------------------------------------------------------------------------------------------------------------------------------------------------------------------|----------------------------------|------------------------------------------------------|------------|--------------------------------------------------------------------------------------------------------------------------------------------------------------------------------------------------------------------------------------------------------------------------------------------------------------------------------------------------|
| Tavares Timenetsky, Terezinha Maria de Paiva                                                                                                                                                                                                                                                                                                                                                                                                   |                                  |                                                      |            |                                                                                                                                                                                                                                                                                                                                                  |
| EPI_ISL_416031                                                                                                                                                                                                                                                                                                                                                                                                                                 | hCoV-19/Brazil/SPBR-09/2020      | South America / Brazil / Sao Paulo / Sao Paulo       | 2020-03-04 |                                                                                                                                                                                                                                                                                                                                                  |
| National Influenza Center - Instituto Adolfo Lutz Instituto Adolfo Lutz, Interdisciplinary Procedures Center, Strategic Laboratory Claudio Tavares Sacchi, Claudia Regina Gonçalves, Carlos Henrique Camargo, Fabiana Cristina Pereira dos Santos, Daniela Bernardes Borges da Silva, Simone Guadagnucci Morillo, Adriano Abbud, Adriana Bugno, Maria do Carmo Sampaio Tavares Timenetsky, Terezinha Maria de Paiva                            |                                  |                                                      |            |                                                                                                                                                                                                                                                                                                                                                  |
| EPI_ISL_416032                                                                                                                                                                                                                                                                                                                                                                                                                                 | hCoV-19/Brazil/SPBR-10/2020      | South America / Brazil / Distrito Federal / Brasilia | 2020-03-04 |                                                                                                                                                                                                                                                                                                                                                  |
| National Influenza Center - Instituto Adolfo Lutz Instituto Adolfo Lutz, Interdisciplinary Procedures Center, Strategic Laboratory Claudio Tavares Sacchi, Claudia Regina Gonçalves, Carlos Henrique Camargo, Fabiana Cristina Pereira dos Santos, Daniela Bernardes Borges da Silva, Simone Guadagnucci Morillo, Adriano Abbud, Adriana Bugno, Maria do Carmo Sampaio Tavares Timenetsky, Terezinha Maria de Paiva                            |                                  |                                                      |            |                                                                                                                                                                                                                                                                                                                                                  |
| EPI_ISL_416033                                                                                                                                                                                                                                                                                                                                                                                                                                 | hCoV-19/Brazil/SPBR-11/2020      | South America / Brazil / Sao Paulo / Sao Paulo       | 2020-03-03 |                                                                                                                                                                                                                                                                                                                                                  |
| Hospital Israelita Albert Einstein Instituto Adolfo Lutz, Interdisciplinary Procedures Center, Strategic Laboratory Claudio Tavares Sacchi, Claudia Regina Gonçalves, Carlos Henrique Camargo, Erica Valessa Ramos Gomes, Fabiana Cristina Pereira dos Santos, Daniela Bernardes Borges da Silva, Simone Guadagnucci Morillo, Adriano Abbud, Adriana Bugno, Maria do Carmo Sampaio Tavares Timenetsky, Terezinha Maria de Paiva                |                                  |                                                      |            |                                                                                                                                                                                                                                                                                                                                                  |
| EPI_ISL_416034                                                                                                                                                                                                                                                                                                                                                                                                                                 | hCoV-19/Brazil/SPBR-12/2020      | South America / Brazil / Sao Paulo / Sao Paulo       | 2020-03-04 |                                                                                                                                                                                                                                                                                                                                                  |
| Hospital Israelita Albert Einstein Instituto Adolfo Lutz, Interdisciplinary Procedures Center, Strategic Laboratory Claudio Tavares Sacchi, Claudia Regina Gonçalves, Carlos Henrique Camargo, Erica Valessa Ramos Gomes, Fabiana Cristina Pereira dos Santos, Daniela Bernardes Borges da Silva, Simone Guadagnucci Morillo, Adriano Abbud, Adriana Bugno, Maria do Carmo Sampaio Tavares Timenetsky, Terezinha Maria de Paiva                |                                  |                                                      |            |                                                                                                                                                                                                                                                                                                                                                  |
| EPI_ISL_416035                                                                                                                                                                                                                                                                                                                                                                                                                                 | hCoV-19/Brazil/SPBR-13/2020      | South America / Brazil / Sao Paulo / Sao Paulo       | 2020-03-05 |                                                                                                                                                                                                                                                                                                                                                  |
| National Influenza Center - Instituto Adolfo Lutz Instituto Adolfo Lutz, Interdisciplinary Procedures Center, Strategic Laboratory Claudio Tavares Sacchi, Claudia Regina Gonçalves, Carlos Henrique Camargo, Erica Valessa Ramos Gomes, Fabiana Cristina Pereira dos Santos, Daniela Bernardes Borges da Silva, Simone Guadagnucci Morillo, Adriano Abbud, Adriana Bugno, Maria do Carmo Sampaio Tavares Timenetsky, Terezinha Maria de Paiva |                                  |                                                      |            |                                                                                                                                                                                                                                                                                                                                                  |
| EPI_ISL_416036                                                                                                                                                                                                                                                                                                                                                                                                                                 | hCoV-19/Brazil/SPBR-14/2020      | South America / Brazil / Sao Paulo / Sao Paulo       | 2020-03-05 |                                                                                                                                                                                                                                                                                                                                                  |
| National Influenza Center - Instituto Adolfo Lutz Instituto Adolfo Lutz, Interdisciplinary Procedures Center, Strategic Laboratory Claudio Tavares Sacchi, Claudia Regina Gonçalves, Carlos Henrique Camargo, Erica Valessa Ramos Gomes, Fabiana Cristina Pereira dos Santos, Daniela Bernardes Borges da Silva, Simone Guadagnucci Morillo, Adriano Abbud, Adriana Bugno, Maria do Carmo Sampaio Tavares Timenetsky, Terezinha Maria de Paiva |                                  |                                                      |            |                                                                                                                                                                                                                                                                                                                                                  |
| EPI_ISL_416140                                                                                                                                                                                                                                                                                                                                                                                                                                 | hCoV-19/Denmark/SSI-05/2020      | Europe / Denmark / Copenhagen                        | 2020-03-02 | Department of Virus and Microbiological Special diagnostics, Statens Serum Institut, Copenhagen, Denmark. Institute Morten Rasmussen, Maiken Worsoe Rosenstjerne , Anders Fomsgaard                                                                                                                                                              |
| EPI_ISL_416141                                                                                                                                                                                                                                                                                                                                                                                                                                 | hCoV-19/Denmark/SSI-09/2020      | Europe / Denmark / Copenhagen                        | 2020-03-03 | Department of Virus and Microbiological Special diagnostics, Statens Serum Institut, Copenhagen, Denmark. Institute Morten Rasmussen, Maiken Worsoe Rosenstjerne , Anders Fomsgaard                                                                                                                                                              |
| EPI_ISL_416142                                                                                                                                                                                                                                                                                                                                                                                                                                 | hCoV-19/Denmark/SSI-01/2020      | Europe / Denmark / Copenhagen                        | 2020-02-26 | Department of Virus and Microbiological Special diagnostics, Statens Serum Institut, Copenhagen, Denmark. Institute Morten Rasmussen, Maiken Worsoe Rosenstjerne , Anders Fomsgaard                                                                                                                                                              |
| EPI_ISL_416143                                                                                                                                                                                                                                                                                                                                                                                                                                 | hCoV-19/Denmark/SSI-02/2020      | Europe / Denmark / Copenhagen                        | 2020-02-28 | Department of Virus and Microbiological Special diagnostics, Statens Serum Institut, Copenhagen, Denmark. Rasmussen, Maiken Worsoe Rosenstjerne , Anders Fomsgaard                                                                                                                                                                               |
| EPI_ISL_416144                                                                                                                                                                                                                                                                                                                                                                                                                                 | hCoV-19/Denmark/SSI-03/2020      | Europe / Denmark / Copenhagen                        | 2020-03-01 | Department of Virus and Microbiological Special diagnostics, Statens Serum Institut, Copenhagen, Denmark. Rasmussen, Maiken Worsoe Rosenstjerne , Anders Fomsgaard                                                                                                                                                                               |
| EPI_ISL_416153                                                                                                                                                                                                                                                                                                                                                                                                                                 | hCoV-19/Denmark/SSI-04/2020      | Europe / Denmark / Copenhagen                        | 2020-03-02 | Department of Virus and Microbiological Special diagnostics, Statens Serum Institut, Copenhagen, Denmark. Rasmussen, Maiken Worsoe Rosenstjerne , Anders Fomsgaard                                                                                                                                                                               |
| EPI_ISL_417301                                                                                                                                                                                                                                                                                                                                                                                                                                 | hCoV-19/England/20110000606/2020 | Europe / United Kingdom / England                    | 2020-03-06 | Respiratory Virus Unit, Microbiology Services Colindale, Public Health England Respiratory Virus Unit, Microbiology Services Colindale, Public Health England Monica Galiano, Shahjahan Miah, Angie Lackenby, Omolola Akinbami, Tiina Talts, Leena Bhaw, Richard Myers, Steven Platt, Kirstin Edwards, Jonathan Hubb, Joanna Ellis, Maria Zambon |
| EPI_ISL_417302                                                                                                                                                                                                                                                                                                                                                                                                                                 | hCoV-19/England/20110000706/2020 | Europe / United Kingdom / England                    | 2020-03-05 | Respiratory Virus Unit, Microbiology Services Colindale, Public Health England Respiratory Virus Unit, Microbiology Services Colindale, Public Health England Monica Galiano, Shahjahan Miah, Angie Lackenby, Omolola Akinbami, Tiina Talts, Leena Bhaw, Richard Myers, Steven Platt, Kirstin Edwards, Jonathan Hubb, Joanna Ellis, Maria Zambon |
| EPI_ISL_417307                                                                                                                                                                                                                                                                                                                                                                                                                                 | hCoV-19/England/20110023706/2020 | Europe / United Kingdom / England                    | 2020-03-08 | Respiratory Virus Unit, Microbiology Services Colindale, Public Health England Respiratory Virus Unit, Microbiology Services Colindale, Public Health England Monica Galiano, Shahjahan Miah, Angie Lackenby, Omolola Akinbami, Tiina Talts, Leena Bhaw, Richard Myers, Steven Platt, Kirstin Edwards, Jonathan Hubb, Joanna Ellis, Maria Zambon |
| EPI_ISL_417311                                                                                                                                                                                                                                                                                                                                                                                                                                 | hCoV-19/England/20110058706/2020 | Europe / United Kingdom / England                    | 2020-03-09 | Respiratory Virus Unit, Microbiology Services Colindale, Public Health England Respiratory Virus Unit, Microbiology Services Colindale, Public Health England Monica Galiano, Shahjahan Miah, Angie Lackenby, Omolola Akinbami, Tiina Talts, Leena Bhaw, Richard Myers, Steven Platt, Kirstin Edwards, Jonathan Hubb, Joanna Ellis,              |

Maria Zambon  
 EPI\_ISL\_417312 hCoV-19/England/20110059306/2020 Europe / United Kingdom / England 2020-03-08  
 Respiratory Virus Unit, Microbiology Services Colindale, Public Health England Respiratory Virus Unit,  
 Microbiology Services Colindale, Public Health England Monica Galiano, Shahjahan Miah, Angie Lackenby, Omolola  
 Akinbami, Tiina Talts, Leena Bhaw, Richard Myers, Steven Platt, Kirstin Edwards, Jonathan Hubb, Joanna Ellis,  
 Maria Zambon  
 EPI\_ISL\_417313 hCoV-19/England/20110097506/2020 Europe / United Kingdom / England 2020-03-08  
 Respiratory Virus Unit, Microbiology Services Colindale, Public Health England Respiratory Virus Unit,  
 Microbiology Services Colindale, Public Health England Monica Galiano, Shahjahan Miah, Angie Lackenby, Omolola  
 Akinbami, Tiina Talts, Leena Bhaw, Richard Myers, Steven Platt, Kirstin Edwards, Jonathan Hubb, Joanna Ellis,  
 Maria Zambon  
 EPI\_ISL\_417314 hCoV-19/England/20112112106/2020 Europe / United Kingdom / England 2020-03-10  
 Respiratory Virus Unit, Microbiology Services Colindale, Public Health England Respiratory Virus Unit,  
 Microbiology Services Colindale, Public Health England Monica Galiano, Shahjahan Miah, Angie Lackenby, Omolola  
 Akinbami, Tiina Talts, Leena Bhaw, Richard Myers, Steven Platt, Kirstin Edwards, Jonathan Hubb, Joanna Ellis,  
 Maria Zambon  
 EPI\_ISL\_417315 hCoV-19/England/20118044606/2020 Europe / United Kingdom / England 2020-03-13  
 Respiratory Virus Unit, Microbiology Services Colindale, Public Health England Respiratory Virus Unit,  
 Microbiology Services Colindale, Public Health England Monica Galiano, Shahjahan Miah, Angie Lackenby, Omolola  
 Akinbami, Tiina Talts, Leena Bhaw, Richard Myers, Steven Platt, Kirstin Edwards, Jonathan Hubb, Joanna Ellis,  
 Maria Zambon  
 EPI\_ISL\_417317 hCoV-19/USA/CA-SCCPHD-UC13/2020 North America / USA / California / Santa Clara County 2020-  
 03-02 Santa Clara County Public Health Department Chiu Laboratory, University of California, San  
 Francisco Xianding Deng, Scot Federman, Wei Gu, Elsa Villarino, Brandon Bonin, Debra A. Wadford, and  
 Charles Y. Chiu  
 EPI\_ISL\_417318 hCoV-19/USA/CA-SCCPHD-UC14/2020 North America / USA / California / Santa Clara County 2020-  
 02-29 Santa Clara County Public Health Department Chiu Laboratory, University of California, San  
 Francisco Xianding Deng, Scot Federman, Wei Gu, Elsa Villarino, Brandon Bonin, Debra A. Wadford, and  
 Charles Y. Chiu  
 EPI\_ISL\_417320 hCoV-19/USA/CA-SCCPHD-UC16/2020 North America / USA / California / Santa Clara County 2020-  
 03-04 Santa Clara County Public Health Department Chiu Laboratory, University of California, San  
 Francisco Xianding Deng, Scot Federman, Wei Gu, Elsa Villarino, Brandon Bonin, Debra A. Wadford, and  
 Charles Y. Chiu  
 EPI\_ISL\_417330 hCoV-19/USA/CA-CDPH-UC26/2020 North America / USA / California / San Francisco County 2020-  
 03-13 Chiu Laboratory, University of California, San Francisco Chiu Laboratory, University of  
 California, San Francisco Xianding Deng, Scot Federman, Wei Gu, and Charles Y. Chiu  
 EPI\_ISL\_417333 hCoV-19/France/Lyon\_06042/2020 Europe / France / ARA 2020-03-04 Institut des Agents  
 Infectieux (IAI), Hospices Civils de Lyon CNR Virus des Infections Respiratoires - France SUD Antonin  
 Bal, Gregory Destras, Gwendolyne Burfin, Solenne Brun, Carine Moustaud, Raphaelle Lamy, Alexandre Gaymard,  
 Maude Bouscambert-Duchamp, Florence Morfin-Sherpa, Martine Valette, Laurence Josset, Bruno Lina  
 EPI\_ISL\_417334 hCoV-19/France/Lyon\_06056/2020 Europe / France / ARA 2020-03-04 Institut des Agents  
 Infectieux (IAI), Hospices Civils de Lyon CNR Virus des Infections Respiratoires - France SUD Antonin  
 Bal, Gregory Destras, Gwendolyne Burfin, Solenne Brun, Carine Moustaud, Raphaelle Lamy, Alexandre Gaymard,  
 Maude Bouscambert-Duchamp, Florence Morfin-Sherpa, Martine Valette, Laurence Josset, Bruno Lina  
 EPI\_ISL\_417335 hCoV-19/France/Lyon\_06573/2020 Europe / France / ARA 2020-03-06 Institut des Agents  
 Infectieux (IAI), Hospices Civils de Lyon CNR Virus des Infections Respiratoires - France SUD Antonin  
 Bal, Gregory Destras, Gwendolyne Burfin, Solenne Brun, Carine Moustaud, Raphaelle Lamy, Alexandre Gaymard,  
 Maude Bouscambert-Duchamp, Florence Morfin-Sherpa, Martine Valette, Laurence Josset, Bruno Lina  
 EPI\_ISL\_417336 hCoV-19/France/Lyon\_0668/2020 Europe / France / ARA 2020-03-06 Institut des Agents  
 Infectieux (IAI), Hospices Civils de Lyon CNR Virus des Infections Respiratoires - France SUD Antonin  
 Bal, Gregory Destras, Gwendolyne Burfin, Solenne Brun, Carine Moustaud, Raphaelle Lamy, Alexandre Gaymard,  
 Maude Bouscambert-Duchamp, Florence Morfin-Sherpa, Martine Valette, Laurence Josset, Bruno Lina  
 EPI\_ISL\_417337 hCoV-19/France/Lyon\_06625/2020 Europe / France / ARA 2020-03-07 Institut des Agents  
 Infectieux (IAI), Hospices Civils de Lyon CNR Virus des Infections Respiratoires - France SUD Antonin  
 Bal, Gregory Destras, Gwendolyne Burfin, Solenne Brun, Carine Moustaud, Raphaelle Lamy, Alexandre Gaymard,  
 Maude Bouscambert-Duchamp, Florence Morfin-Sherpa, Martine Valette, Laurence Josset, Bruno Lina  
 EPI\_ISL\_417338 hCoV-19/France/Macon\_06756/2020 Europe / France / ARA 2020-03-07 Centre Hospitalier de  
 Macon CNR Virus des Infections Respiratoires - France SUD Antonin Bal, Gregory Destras, Gwendolyne  
 Burfin, Solenne Brun, Carine Moustaud, Raphaelle Lamy, Alexandre Gaymard, Maude Bouscambert-Duchamp, Florence  
 Morfin-Sherpa, Martine Valette, Laurence Josset, Bruno Lina  
 EPI\_ISL\_417339 hCoV-19/France/Lyon\_06820/2020 Europe / France / ARA 2020-03-08 Institut des Agents  
 Infectieux (IAI), Hospices Civils de Lyon CNR Virus des Infections Respiratoires - France SUD Antonin  
 Bal, Gregory Destras, Gwendolyne Burfin, Solenne Brun, Carine Moustaud, Raphaelle Lamy, Alexandre Gaymard,  
 Maude Bouscambert-Duchamp, Florence Morfin-Sherpa, Martine Valette, Laurence Josset, Bruno Lina  
 EPI\_ISL\_417340 hCoV-19/France/Bourg-en-Bresse\_06813/2020 Europe / France / ARA 2020-03-07 Centre  
 Hospitalier de Bourg en Bresse CNR Virus des Infections Respiratoires - France SUD Antonin Bal, Gregory  
 Destras, Gwendolyne Burfin, Solenne Brun, Carine Moustaud, Raphaelle Lamy, Alexandre Gaymard, Maude  
 Bouscambert-Duchamp, Florence Morfin-Sherpa, Martine Valette, Laurence Josset, Bruno Lina  
 EPI\_ISL\_417341 hCoV-19/USA/WA-UW192/2020 North America / USA / Washington 2020-03-13 UW  
 Virology Lab UWVirology Lab Pavitra Roychoudhury, Hong Xie, Keith Jerome, Alexander Greninger

|                                                               |                                                                                                                                                                                                                                                                                                                                 |                                                |            |                    |
|---------------------------------------------------------------|---------------------------------------------------------------------------------------------------------------------------------------------------------------------------------------------------------------------------------------------------------------------------------------------------------------------------------|------------------------------------------------|------------|--------------------|
| EPI_ISL_417342                                                | hCoV-19/USA/WA-UW193/2020                                                                                                                                                                                                                                                                                                       | North America / USA / Washington               | 2020-03-13 | UW                 |
| Virology Lab                                                  | UW Virology Lab Pavitra Roychoudhury, Hong Xie, Keith Jerome, Alexander Greninger                                                                                                                                                                                                                                               |                                                |            |                    |
| EPI_ISL_417343                                                | hCoV-19/USA/WA-UW194/2020                                                                                                                                                                                                                                                                                                       | North America / USA / Washington               | 2020-03-13 | UW                 |
| Virology Lab                                                  | UW Virology Lab Pavitra Roychoudhury, Hong Xie, Keith Jerome, Alexander Greninger                                                                                                                                                                                                                                               |                                                |            |                    |
| EPI_ISL_417344                                                | hCoV-19/USA/WA-UW195/2020                                                                                                                                                                                                                                                                                                       | North America / USA / Washington               | 2020-03-13 | UW                 |
| Virology Lab                                                  | UW Virology Lab Pavitra Roychoudhury, Hong Xie, Keith Jerome, Alexander Greninger                                                                                                                                                                                                                                               |                                                |            |                    |
| EPI_ISL_417345                                                | hCoV-19/USA/WA-UW196/2020                                                                                                                                                                                                                                                                                                       | North America / USA / Washington               | 2020-03-13 | UW                 |
| Virology Lab                                                  | UW Virology Lab Pavitra Roychoudhury, Hong Xie, Keith Jerome, Alexander Greninger                                                                                                                                                                                                                                               |                                                |            |                    |
| EPI_ISL_417346                                                | hCoV-19/USA/WA-UW197/2020                                                                                                                                                                                                                                                                                                       | North America / USA / Washington               | 2020-03-12 | UW                 |
| Virology Lab                                                  | UW Virology Lab Pavitra Roychoudhury, Hong Xie, Keith Jerome, Alexander Greninger                                                                                                                                                                                                                                               |                                                |            |                    |
| EPI_ISL_417347                                                | hCoV-19/USA/WA-UW198/2020                                                                                                                                                                                                                                                                                                       | North America / USA / Washington               | 2020-03-12 | UW                 |
| Virology Lab                                                  | UW Virology Lab Pavitra Roychoudhury, Hong Xie, Keith Jerome, Alexander Greninger                                                                                                                                                                                                                                               |                                                |            |                    |
| EPI_ISL_417348                                                | hCoV-19/USA/WA-UW199/2020                                                                                                                                                                                                                                                                                                       | North America / USA / Washington               | 2020-03-13 | UW                 |
| Virology Lab                                                  | UW Virology Lab Pavitra Roychoudhury, Hong Xie, Keith Jerome, Alexander Greninger                                                                                                                                                                                                                                               |                                                |            |                    |
| EPI_ISL_417349                                                | hCoV-19/USA/WA-UW200/2020                                                                                                                                                                                                                                                                                                       | North America / USA / Washington               | 2020-03-12 | UW                 |
| Virology Lab                                                  | UW Virology Lab Pavitra Roychoudhury, Hong Xie, Keith Jerome, Alexander Greninger                                                                                                                                                                                                                                               |                                                |            |                    |
| EPI_ISL_417350                                                | hCoV-19/USA/WA-UW201/2020                                                                                                                                                                                                                                                                                                       | North America / USA / Washington               | 2020-03-12 | UW                 |
| Virology Lab                                                  | UW Virology Lab Pavitra Roychoudhury, Hong Xie, Keith Jerome, Alexander Greninger                                                                                                                                                                                                                                               |                                                |            |                    |
| EPI_ISL_417351                                                | hCoV-19/USA/WA-UW202/2020                                                                                                                                                                                                                                                                                                       | North America / USA / Washington               | 2020-03-12 | UW                 |
| Virology Lab                                                  | UW Virology Lab Pavitra Roychoudhury, Hong Xie, Keith Jerome, Alexander Greninger                                                                                                                                                                                                                                               |                                                |            |                    |
| EPI_ISL_417352                                                | hCoV-19/USA/WA-UW203/2020                                                                                                                                                                                                                                                                                                       | North America / USA / Washington               | 2020-03-12 | UW                 |
| Virology Lab                                                  | UW Virology Lab Pavitra Roychoudhury, Hong Xie, Keith Jerome, Alexander Greninger                                                                                                                                                                                                                                               |                                                |            |                    |
| EPI_ISL_417353                                                | hCoV-19/USA/WA-UW204/2020                                                                                                                                                                                                                                                                                                       | North America / USA / Washington               | 2020-03-13 | UW                 |
| Virology Lab                                                  | UW Virology Lab Pavitra Roychoudhury, Hong Xie, Keith Jerome, Alexander Greninger                                                                                                                                                                                                                                               |                                                |            |                    |
| EPI_ISL_417354                                                | hCoV-19/USA/WA-UW205/2020                                                                                                                                                                                                                                                                                                       | North America / USA / Washington               | 2020-03-13 | UW                 |
| Virology Lab                                                  | UW Virology Lab Pavitra Roychoudhury, Hong Xie, Keith Jerome, Alexander Greninger                                                                                                                                                                                                                                               |                                                |            |                    |
| EPI_ISL_417355                                                | hCoV-19/USA/WA-UW206/2020                                                                                                                                                                                                                                                                                                       | North America / USA / Washington               | 2020-03-13 | UW                 |
| Virology Lab                                                  | UW Virology Lab Pavitra Roychoudhury, Hong Xie, Keith Jerome, Alexander Greninger                                                                                                                                                                                                                                               |                                                |            |                    |
| EPI_ISL_417356                                                | hCoV-19/USA/WA-UW207/2020                                                                                                                                                                                                                                                                                                       | North America / USA / Washington               | 2020-03-13 | UW                 |
| Virology Lab                                                  | UW Virology Lab Pavitra Roychoudhury, Hong Xie, Keith Jerome, Alexander Greninger                                                                                                                                                                                                                                               |                                                |            |                    |
| EPI_ISL_417358                                                | hCoV-19/USA/WA-UW209/2020                                                                                                                                                                                                                                                                                                       | North America / USA / Washington               | 2020-03-13 | UW                 |
| Virology Lab                                                  | UW Virology Lab Pavitra Roychoudhury, Hong Xie, Keith Jerome, Alexander Greninger                                                                                                                                                                                                                                               |                                                |            |                    |
| EPI_ISL_417359                                                | hCoV-19/USA/WA-UW210/2020                                                                                                                                                                                                                                                                                                       | North America / USA / Washington               | 2020-03-14 | UW                 |
| Virology Lab                                                  | UW Virology Lab Pavitra Roychoudhury, Hong Xie, Keith Jerome, Alexander Greninger                                                                                                                                                                                                                                               |                                                |            |                    |
| EPI_ISL_417360                                                | hCoV-19/USA/WA-UW211/2020                                                                                                                                                                                                                                                                                                       | North America / USA / Washington               | 2020-03-14 | UW                 |
| Virology Lab                                                  | UW Virology Lab Pavitra Roychoudhury, Hong Xie, Keith Jerome, Alexander Greninger                                                                                                                                                                                                                                               |                                                |            |                    |
| EPI_ISL_417361                                                | hCoV-19/USA/WA-UW212/2020                                                                                                                                                                                                                                                                                                       | North America / USA / Washington               | 2020-03-14 | UW                 |
| Virology Lab                                                  | UW Virology Lab Pavitra Roychoudhury, Hong Xie, Keith Jerome, Alexander Greninger                                                                                                                                                                                                                                               |                                                |            |                    |
| EPI_ISL_417362                                                | hCoV-19/USA/CT-UW213/2020                                                                                                                                                                                                                                                                                                       | North America / USA / Connecticut              | 2020-03-13 | UW                 |
| Virology Lab                                                  | UW Virology Lab Pavitra Roychoudhury, Hong Xie, Keith Jerome, Alexander Greninger                                                                                                                                                                                                                                               |                                                |            |                    |
| EPI_ISL_417363                                                | hCoV-19/USA/WA-UW214/2020                                                                                                                                                                                                                                                                                                       | North America / USA / Washington               | 2020-03-14 | UW                 |
| Virology Lab                                                  | UW Virology Lab Pavitra Roychoudhury, Hong Xie, Keith Jerome, Alexander Greninger                                                                                                                                                                                                                                               |                                                |            |                    |
| EPI_ISL_417364                                                | hCoV-19/USA/WA-UW215/2020                                                                                                                                                                                                                                                                                                       | North America / USA / Washington               | 2020-03-12 | UW                 |
| Virology Lab                                                  | UW Virology Lab Pavitra Roychoudhury, Hong Xie, Keith Jerome, Alexander Greninger                                                                                                                                                                                                                                               |                                                |            |                    |
| EPI_ISL_417365                                                | hCoV-19/USA/WA-UW216/2020                                                                                                                                                                                                                                                                                                       | North America / USA / Washington               | 2020-03-14 | UW                 |
| Virology Lab                                                  | UW Virology Lab Pavitra Roychoudhury, Hong Xie, Keith Jerome, Alexander Greninger                                                                                                                                                                                                                                               |                                                |            |                    |
| EPI_ISL_417366                                                | hCoV-19/USA/WA-UW217/2020                                                                                                                                                                                                                                                                                                       | North America / USA / Washington               | 2020-03-14 | UW                 |
| Virology Lab                                                  | UW Virology Lab Pavitra Roychoudhury, Hong Xie, Keith Jerome, Alexander Greninger                                                                                                                                                                                                                                               |                                                |            |                    |
| EPI_ISL_417367                                                | hCoV-19/USA/WA-UW218/2020                                                                                                                                                                                                                                                                                                       | North America / USA / Washington               | 2020-03-13 | UW                 |
| Virology Lab                                                  | UW Virology Lab Pavitra Roychoudhury, Hong Xie, Keith Jerome, Alexander Greninger                                                                                                                                                                                                                                               |                                                |            |                    |
| EPI_ISL_417368                                                | hCoV-19/USA/UN-UW219/2020                                                                                                                                                                                                                                                                                                       | North America / USA                            | 2020-03-13 | UW Virology Lab UW |
| Virology Lab                                                  | Pavitra Roychoudhury, Hong Xie, Keith Jerome, Alexander Greninger                                                                                                                                                                                                                                                               |                                                |            |                    |
| EPI_ISL_417369                                                | hCoV-19/USA/WA-UW220/2020                                                                                                                                                                                                                                                                                                       | North America / USA / Washington               | 2020-03-14 | UW                 |
| Virology Lab                                                  | UW Virology Lab Pavitra Roychoudhury, Hong Xie, Keith Jerome, Alexander Greninger                                                                                                                                                                                                                                               |                                                |            |                    |
| EPI_ISL_417390                                                | hCoV-19/Australia/NSW27/2020                                                                                                                                                                                                                                                                                                    | Oceania / Australia / New South Wales / Sydney | 2020-03-08 |                    |
| Centre for Infectious Diseases and Microbiology Public Health | NSW Health Pathology - Institute of Clinical Pathology and Medical Research; Westmead Hospital; University of Sydney Sadsad R, Carter I, Rahman H, Holmes EC, O'Sullivan MV, Sintchenko V, Chen SC, Maddocks S, Kok J, Dwyer DE, Rockett R, Eden J-S, Lam C, Gray K, Timms V, Gall M and Arnott A for the 2019-nCoV Study Group |                                                |            |                    |
| EPI_ISL_417391                                                | hCoV-19/Australia/NSW28/2020                                                                                                                                                                                                                                                                                                    | Oceania / Australia / New South Wales / Sydney | 2020-03-08 |                    |
| Centre for Infectious Diseases and Microbiology Public Health | NSW Health Pathology - Institute of Clinical Pathology and Medical Research; Westmead Hospital; University of Sydney Carter I, Rahman H, Holmes EC, O'Sullivan MV, Sintchenko V, Chen SC, Maddocks S, Kok J, Dwyer DE, Rockett R, Eden J-S, Lam C, Gray K, Timms V, Gall M, Arnott A and Sadsad R for the 2019-nCoV Study Group |                                                |            |                    |
| EPI_ISL_417392                                                | hCoV-19/Australia/NSW31/2020                                                                                                                                                                                                                                                                                                    | Oceania / Australia / New South Wales / Sydney | 2020-03-10 |                    |
| Centre for Infectious Diseases and Microbiology Public Health | NSW Health Pathology - Institute of Clinical Pathology and Medical Research; Westmead Hospital; University of Sydney Rahman H, Holmes EC, O'Sullivan MV, Sintchenko V, Chen SC, Maddocks S, Kok J, Dwyer DE, Rockett R, Eden J-S, Lam C, Gray K, Timms V, Gall M, Arnott A, Sadsad R and Carter I for the 2019-nCoV Study Group |                                                |            |                    |
| EPI_ISL_417393                                                | hCoV-19/Australia/NSW35/2020                                                                                                                                                                                                                                                                                                    | Oceania / Australia / New South Wales / Sydney | 2020-03-08 |                    |

Centre for Infectious Diseases and Microbiology Public Health NSW Health Pathology - Institute of Clinical Pathology and Medical Research; Westmead Hospital; University of Sydney Holmes EC, O'Sullivan MV, Sintchenko V, Chen SC, Maddocks S, Kok J, Dwyer DE, Rockett R, Eden J-S, Lam C, Gray K, Timms V, Gall M, Arnott A, Sadsad R, Carter I and Rahman H for the 2019-nCoV Study Group  
EPI\_ISL\_417394 hCoV-19/Australia/NSW36/2020 Oceania / Australia / New South Wales / Sydney 2020-03-10  
Centre for Infectious Diseases and Microbiology Public Health NSW Health Pathology - Institute of Clinical Pathology and Medical Research; Westmead Hospital; University of Sydney O'Sullivan MV, Sintchenko V, Chen SC, Maddocks S, Kok J, Dwyer DE, Rockett R, Eden J-S, Lam C, Gray K, Timms V, Gall M, Arnott A, Sadsad R, Carter I, Rahman H and Holmes EC for the 2019-nCoV Study Group  
EPI\_ISL\_417395 hCoV-19/Australia/NSW37/2020 Oceania / Australia / New South Wales / Sydney 2020-03-10  
Centre for Infectious Diseases and Microbiology Public Health NSW Health Pathology - Institute of Clinical Pathology and Medical Research; Westmead Hospital; University of Sydney Sintchenko V, Chen SC, Maddocks S, Kok J, Dwyer DE, Rockett R, Eden J-S, Lam C, Gray K, Timms V, Gall M, Arnott A, Sadsad R, Carter I, Rahman H, Holmes EC and O'Sullivan MV for the 2019-nCoV Study Group  
EPI\_ISL\_417396 hCoV-19/Australia/NSW38/2020 Oceania / Australia / New South Wales / Sydney 2020-03-10  
Centre for Infectious Diseases and Microbiology Public Health NSW Health Pathology - Institute of Clinical Pathology and Medical Research; Westmead Hospital; University of Sydney Chen SC, Maddocks S, Kok J, Dwyer DE, Rockett R, Eden J-S, Lam C, Gray K, Timms V, Gall M, Arnott A, Sadsad R, Carter I, Rahman H, Holmes EC, O'Sullivan MV and Sintchenko V for the 2019-nCoV Study Group  
EPI\_ISL\_417397 hCoV-19/Australia/NSW39/2020 Oceania / Australia / New South Wales / Sydney 2020-03-11  
Centre for Infectious Diseases and Microbiology Public Health NSW Health Pathology - Institute of Clinical Pathology and Medical Research; Westmead Hospital; University of Sydney Maddocks S, Kok J, Dwyer DE, Rockett R, Eden J-S, Lam C, Gray K, Timms V, Gall M, Arnott A, Sadsad R, Carter I, Rahman H, Holmes EC, O'Sullivan MV, Sintchenko V and Chen SC for the 2019-nCoV Study Group  
EPI\_ISL\_417398 hCoV-19/Australia/NSW40/2020 Oceania / Australia / New South Wales / Sydney 2020-03-11  
Centre for Infectious Diseases and Microbiology Public Health NSW Health Pathology - Institute of Clinical Pathology and Medical Research; Westmead Hospital; University of Sydney Kok J, Dwyer DE, Rockett R, Eden J-S, Lam C, Gray K, Timms V, Gall M, Arnott A, Sadsad R, Carter I, Rahman H, Holmes EC, O'Sullivan MV, Sintchenko V, Chen SC and Maddocks S for the 2019-nCoV Study Group  
EPI\_ISL\_417399 hCoV-19/Australia/NSW41/2020 Oceania / Australia / New South Wales / Sydney 2020-03-10  
Centre for Infectious Diseases and Microbiology Public Health NSW Health Pathology - Institute of Clinical Pathology and Medical Research; Westmead Hospital; University of Sydney Dwyer DE, Rockett R, Eden J-S, Lam C, Gray K, Timms V, Gall M, Arnott A, Sadsad R, Carter I, Rahman H, Holmes EC, O'Sullivan MV, Sintchenko V, Chen SC, Maddocks S and Kok J for the 2019-nCoV Study Group  
EPI\_ISL\_417408 hCoV-19/Australia/NSW56/2020 Oceania / Australia / New South Wales / Sydney 2020-03-17  
Centre for Infectious Diseases and Microbiology Public Health NSW Health Pathology - Institute of Clinical Pathology and Medical Research; Westmead Hospital; University of Sydney Carter I, Rahman H, Holmes EC, O'Sullivan MV, Sintchenko V, Chen SC, Maddocks S, Kok J, Dwyer DE, Rockett R, Eden J-S, Lam C, Gray K, Timms V, Gall M, Arnott A and Sadsad R for the 2019-nCoV Study Group  
EPI\_ISL\_417409 hCoV-19/Australia/NSW57/2020 Oceania / Australia / New South Wales / Sydney 2020-03-16  
Centre for Infectious Diseases and Microbiology Public Health NSW Health Pathology - Institute of Clinical Pathology and Medical Research; Westmead Hospital; University of Sydney Rahman H, Holmes EC, O'Sullivan MV, Sintchenko V, Chen SC, Maddocks S, Kok J, Dwyer DE, Rockett R, Eden J-S, Lam C, Gray K, Timms V, Gall M, Arnott A, Sadsad R and Carter I for the 2019-nCoV Study Group  
EPI\_ISL\_417410 hCoV-19/Australia/NSW58/2020 Oceania / Australia / New South Wales / Sydney 2020-03-16  
Centre for Infectious Diseases and Microbiology Public Health NSW Health Pathology - Institute of Clinical Pathology and Medical Research; Westmead Hospital; University of Sydney Holmes EC, O'Sullivan MV, Sintchenko V, Chen SC, Maddocks S, Kok J, Dwyer DE, Rockett R, Eden J-S, Lam C, Gray K, Timms V, Gall M, Arnott A, Sadsad R, Carter I and Rahman H for the 2019-nCoV Study Group  
EPI\_ISL\_417411 hCoV-19/Australia/NSW61/2020 Oceania / Australia / New South Wales / Sydney 2020-03-17  
Centre for Infectious Diseases and Microbiology Public Health NSW Health Pathology - Institute of Clinical Pathology and Medical Research; Westmead Hospital; University of Sydney O'Sullivan MV, Sintchenko V, Chen SC, Maddocks S, Kok J, Dwyer DE, Rockett R, Eden J-S, Lam C, Gray K, Timms V, Gall M, Arnott A, Sadsad R, Carter I, Rahman H and Holmes EC for the 2019-nCoV Study Group  
EPI\_ISL\_417412 hCoV-19/Australia/NSW62/2020 Oceania / Australia / New South Wales / Sydney 2020-03-17  
Centre for Infectious Diseases and Microbiology Public Health NSW Health Pathology - Institute of Clinical Pathology and Medical Research; Westmead Hospital; University of Sydney Sintchenko V, Chen SC, Maddocks S, Kok J, Dwyer DE, Rockett R, Eden J-S, Lam C, Gray K, Timms V, Gall M, Arnott A, Sadsad R, Carter I, Rahman H, Holmes EC and O'Sullivan MV for the 2019-nCoV Study Group  
EPI\_ISL\_417418 hCoV-19/Italy/FVG-ICGEB\_S1/2020 Europe / Italy / Friuli Venezia Giulia 2020-03-01  
Laboratory of Molecular Virology International Center for Genetic Engineering and Biotechnology (ICGEB) ARGO Open Lab Platform for Genome sequencing Licastro D, Rajasekharan S, Dal Monego S, Segat L, D'Agaro P, Marcello A  
EPI\_ISL\_417419 hCoV-19/Italy/FVG-ICGEB\_S5/2020 Europe / Italy / Friuli Venezia Giulia 2020-03-01  
Laboratory of Molecular Virology International Center for Genetic Engineering and Biotechnology (ICGEB) ARGO Open Lab Platform for Genome sequencing Licastro D, Rajasekharan S, Dal Monego S, Segat L, D'Agaro P, Marcello A  
EPI\_ISL\_417420 hCoV-19/NanChang/JX216/2020 Asia / China / NanChang 2020-03-23 Jiangxi province Center for Disease Control and Prevention Jiangxi province Center for Disease Control and Prevention Li jian Xiong

EPI\_ISL\_417421 hCoV-19/Hong Kong/FVG-ICGEB\_S8/2020 Europe / Italy / Friuli Venezia Giulia 2020-03-01  
Laboratory of Molecular Virology International Center for Genetic Engineering and Biotechnology (ICGEB) ARGO  
Open Lab Platform for Genome sequencing Licastro D, Rajasekharan S, Dal Monego S, Segat L, D'Agaro P, Marcello A

EPI\_ISL\_417422 hCoV-19/Belgium/DHWM-03041/2020 Europe / Belgium / Dilbeek 2020-03-04 KU Leuven,  
Clinical and Epidemiological Virology KU Leuven, Clinical and Epidemiological Virology Joan Marti-  
Carerras, Tony Wawina, Bert Vanmechelen, Piet Maes

EPI\_ISL\_417423 hCoV-19/Italy/FVG-ICGEB\_S9/2020 Europe / Italy / Friuli Venezia Giulia 2020-03-01  
Laboratory of Molecular Virology International Center for Genetic Engineering and Biotechnology (ICGEB) ARGO  
Open Lab Platform for Genome sequencing Licastro D, Rajasekharan, Dal Monego S, Segat L, D'Agaro P, Marcello A

EPI\_ISL\_417424 hCoV-19/Belgium/KA-03042/2020 Europe / Belgium / Kasterlee 2020-03-04 KU Leuven,  
Clinical and Epidemiological Virology KU Leuven, Clinical and Epidemiological Virology Joan Marti-  
Carerras, Tony Wawina, Bert Vanmechelen, Piet Maes

EPI\_ISL\_417425 hCoV-19/Belgium/VBK-03061/2020 Europe / Belgium / Schoten 2020-03-06 KU Leuven,  
Clinical and Epidemiological Virology KU Leuven, Clinical and Epidemiological Virology Joan Marti-  
Carerras, Tony Wawina, Bert Vanmechelen, Piet Maes

EPI\_ISL\_417426 hCoV-19/Belgium/SQ-03043/2020 Europe / Belgium / Leuven 2020-03-04 KU Leuven,  
Clinical and Epidemiological Virology KU Leuven, Clinical and Epidemiological Virology Joan Marti-  
Carerras, Tony Wawina, Bert Vanmechelen, Piet Maes

EPI\_ISL\_417427 hCoV-19/Belgium/VI-03027/2020 Europe / Belgium / Sint-Pieters-Woluwe 2020-03-02 KU  
Leuven, Clinical and Epidemiological Virology KU Leuven, Clinical and Epidemiological Virology Joan  
Marti-Carerras, Tony Wawina, Bert Vanmechelen, Piet Maes

EPI\_ISL\_417428 hCoV-19/Belgium/FR-03029/2020 Europe / Belgium / Rixensart 2020-03-02 KU Leuven,  
Clinical and Epidemiological Virology KU Leuven, Clinical and Epidemiological Virology Joan Marti-  
Carerras, Tony Wawina, Bert Vanmechelen, Piet Maes

EPI\_ISL\_417429 hCoV-19/Belgium/MMJ-03034/2020 Europe / Belgium / Holsbeek 2020-03-03 KU Leuven,  
Clinical and Epidemiological Virology KU Leuven, Clinical and Epidemiological Virology Joan Marti-  
Carerras, Tony Wawina, Bert Vanmechelen, Piet Maes

EPI\_ISL\_417430 hCoV-19/Belgium/RT-03035/2020 Europe / Belgium / Vorst 2020-03-03 KU Leuven,  
Clinical and Epidemiological Virology KU Leuven, Clinical and Epidemiological Virology Joan Marti-  
Carerras, Tony Wawina, Bert Vanmechelen, Piet Maes

EPI\_ISL\_417437 hCoV-19/DRC/KN-0054/2020 Africa / Democratic Republic of the Congo / Kinshasa 2020-  
03-17 Viral Respiratory Lab, National Institute for Biomedical Research (INRB) Pathogen Sequencing  
Lab, National Institute for Biomedical Research (INRB) Placide Mbala-Kingebeni, Edith Nkwembe, Eddy Kinganda-  
Lusamaki, Amuri Aziza, Catherine Pratt, Matthias Pauthner, Josh Quick, Allison Black, James Hadfield, Trevor  
Bedford, Ian Goodfellow, Nick Loman, Kristian Andersen, Michael Wiley, Steve Ahuka-Mundeke, Jean-Jacques  
Muyembe Tamfum

EPI\_ISL\_417438 hCoV-19/DRC/KN-0058/2020 Africa / Democratic Republic of the Congo / Kinshasa 2020-  
03-17 Viral Respiratory Lab, National Institute for Biomedical Research (INRB) Pathogen Sequencing  
Lab, National Institute for Biomedical Research (INRB) Placide Mbala-Kingebeni, Edith Nkwembe, Eddy Kinganda-  
Lusamaki, Amuri Aziza, Catherine Pratt, Matthias Pauthner, Josh Quick, Allison Black, James Hadfield, Trevor  
Bedford, Ian Goodfellow, Nick Loman, Kristian Andersen, Michael Wiley, Steve Ahuka-Mundeke, Jean-Jacques  
Muyembe Tamfum

EPI\_ISL\_417440 hCoV-19/DRC/KN-0060/2020 Africa / Democratic Republic of the Congo / Kinshasa 2020-  
03-17 Viral Respiratory Lab, National Institute for Biomedical Research (INRB) Pathogen Sequencing  
Lab, National Institute for Biomedical Research (INRB) Placide Mbala-Kingebeni, Edith Nkwembe, Eddy Kinganda-  
Lusamaki, Amuri Aziza, Catherine Pratt, Matthias Pauthner, Josh Quick, Allison Black, James Hadfield, Trevor  
Bedford, Ian Goodfellow, Nick Loman, Kristian Andersen, Michael Wiley, Steve Ahuka-Mundeke, Jean-Jacques  
Muyembe Tamfum

EPI\_ISL\_417442 hCoV-19/DRC/KN-0072/2020 Africa / Democratic Republic of the Congo / Kinshasa 2020-  
03-18 Viral Respiratory Lab, National Institute for Biomedical Research (INRB) Pathogen Sequencing  
Lab, National Institute for Biomedical Research (INRB) Placide Mbala-Kingebeni, Edith Nkwembe, Eddy Kinganda-  
Lusamaki, Amuri Aziza, Catherine Pratt, Matthias Pauthner, Josh Quick, Allison Black, James Hadfield, Trevor  
Bedford, Ian Goodfellow, Nick Loman, Kristian Andersen, Michael Wiley, Steve Ahuka-Mundeke, Jean-Jacques  
Muyembe Tamfum

EPI\_ISL\_417443 hCoV-19/Hong Kong/XM-PII-S4/2020 Asia / Hong Kong 2020-01-22 State Key  
Laboratory for Emerging Infectious Diseases Department of Microbiology Li Ka Shing Faculty of Medicine The  
University of Hong Kong State Key Laboratory for Emerging Infectious Diseases Department of Microbiology Li Ka  
Shing Faculty of Medicine The University of Hong Kong Pui Wang, Siu-Ying Lau, Shaofeng Deng, Bobo Wing-Yee  
Mok, Wenjun Song, Kwok-Yung Yuen, Honglin Chen

EPI\_ISL\_417444 hCoV-19/Pakistan/Gilgit1/2020 Asia / Pakistan / Gilgit 2020-03-04 unknown  
Department of Healthcare Biotechnology Javed,A., Niazi,S.K., Ghani,E., Saqib,M., Janjua,H.A., Corman,V.M. and  
Zohaib,A.

EPI\_ISL\_417445 hCoV-19/Italy/UniMI01/2020 Europe / Italy / Lombardy / Milan 2020-02-24  
Laboratory of Infectious Diseases, Department of Biomedical and Clinical Sciences L. Sacco, University of Milan  
Laboratory of Infectious Diseases, Department of Biomedical and Clinical Sciences L. Sacco, University of Milan  
Gianguglielmo Zehender, Alessia Lai, Annalisa Bergna, Luca Meroni, Agostino Riva, Claudia Balotta, Maciej  
Tarkowski, Arianna Gabrieli, Dario Bernacchia, Stefano Rusconi, Giuliano Rizzardini, Spinello Antinori, Massimo  
Galli

EPI\_ISL\_417447 hCoV-19/Italy/UniMI03/2020 Europe / Italy / Lombardy / Milan 2020-02-24

Laboratory of Infectious Diseases, Department of Biomedical and Clinical Sciences L. Sacco, University of Milan  
Laboratory of Infectious Diseases, Department of Biomedical and Clinical Sciences L. Sacco, University of Milan  
Gianguglielmo Zehender, Alessia Lai, Annalisa Bergna, Luca Meroni, Agostino Riva, Claudia Balotta, Maciej  
Tarkowski, Arianna Gabrieli, Dario Bernacchia, Stefano Rusconi, Giuliano Rizzardini, Spinello Antinori, Massimo  
Galli

|                                                                                           |                                                                                                                                                                                                                                                           |                                                         |            |                                                                                           |
|-------------------------------------------------------------------------------------------|-----------------------------------------------------------------------------------------------------------------------------------------------------------------------------------------------------------------------------------------------------------|---------------------------------------------------------|------------|-------------------------------------------------------------------------------------------|
| EPI_ISL_417448                                                                            | hCoV-19/USA/WA-UW234/2020                                                                                                                                                                                                                                 | North America / USA / Washington                        | 2020-03-14 | UW                                                                                        |
| Virology Lab                                                                              | UW Virology Lab Pavitra Roychoudhury, Hong Xie, Keith Jerome, Alexander Greninger                                                                                                                                                                         |                                                         |            |                                                                                           |
| EPI_ISL_417449                                                                            | hCoV-19/USA/WA-UW235/2020                                                                                                                                                                                                                                 | North America / USA / Washington                        | 2020-03-14 | UW                                                                                        |
| Virology Lab                                                                              | UW Virology Lab Pavitra Roychoudhury, Hong Xie, Keith Jerome, Alexander Greninger                                                                                                                                                                         |                                                         |            |                                                                                           |
| EPI_ISL_417450                                                                            | hCoV-19/USA/WA-UW236/2020                                                                                                                                                                                                                                 | North America / USA / Washington                        | 2020-03-14 | UW                                                                                        |
| Virology Lab                                                                              | UW Virology Lab Pavitra Roychoudhury, Hong Xie, Keith Jerome, Alexander Greninger                                                                                                                                                                         |                                                         |            |                                                                                           |
| EPI_ISL_417451                                                                            | hCoV-19/USA/WA-UW237/2020                                                                                                                                                                                                                                 | North America / USA / Washington                        | 2020-03-14 | UW                                                                                        |
| Virology Lab                                                                              | UW Virology Lab Pavitra Roychoudhury, Hong Xie, Keith Jerome, Alexander Greninger                                                                                                                                                                         |                                                         |            |                                                                                           |
| EPI_ISL_417452                                                                            | hCoV-19/USA/CT-UW238/2020                                                                                                                                                                                                                                 | North America / USA / Connecticut                       | 2020-03-12 | UW                                                                                        |
| Virology Lab                                                                              | UW Virology Lab Pavitra Roychoudhury, Hong Xie, Keith Jerome, Alexander Greninger                                                                                                                                                                         |                                                         |            |                                                                                           |
| EPI_ISL_417453                                                                            | hCoV-19/USA/WA-UW239/2020                                                                                                                                                                                                                                 | North America / USA / Washington                        | 2020-03-14 | UW                                                                                        |
| Virology Lab                                                                              | UW Virology Lab Pavitra Roychoudhury, Hong Xie, Keith Jerome, Alexander Greninger                                                                                                                                                                         |                                                         |            |                                                                                           |
| EPI_ISL_417454                                                                            | hCoV-19/USA/WA-UW240/2020                                                                                                                                                                                                                                 | North America / USA / Washington                        | 2020-03-14 | UW                                                                                        |
| Virology Lab                                                                              | UW Virology Lab Pavitra Roychoudhury, Hong Xie, Keith Jerome, Alexander Greninger                                                                                                                                                                         |                                                         |            |                                                                                           |
| EPI_ISL_417455                                                                            | hCoV-19/USA/WA-UW241/2020                                                                                                                                                                                                                                 | North America / USA / Washington                        | 2020-03-14 | UW                                                                                        |
| Virology Lab                                                                              | UW Virology Lab Pavitra Roychoudhury, Hong Xie, Keith Jerome, Alexander Greninger                                                                                                                                                                         |                                                         |            |                                                                                           |
| EPI_ISL_417456                                                                            | hCoV-19/USA/WA-UW242/2020                                                                                                                                                                                                                                 | North America / USA / Washington                        | 2020-03-13 | UW                                                                                        |
| Virology Lab                                                                              | UW Virology Lab Pavitra Roychoudhury, Hong Xie, Keith Jerome, Alexander Greninger                                                                                                                                                                         |                                                         |            |                                                                                           |
| EPI_ISL_417457                                                                            | hCoV-19/Germany/NRW-12/2020                                                                                                                                                                                                                               | Europe / Germany / North Rhine Westphalia / Duesseldorf | 2020-03-10 | Center of Medical Microbiology, Virology, and Hospital Hygiene, University of Duesseldorf |
| Center of Medical Microbiology, Virology, and Hospital Hygiene, University of Duesseldorf | Ortwin Adams, Marcel Andree, Alexander Dilthey, Torsten Feldt, Sandra Hauka, Torsten Houwaart, Björn-Erik Jensen, Detlef Kindgen-Milles, Malte Kohns Vasconcelos, Klaus Pfeiffer, Tina Senff, Daniel Strelow, Jörg Timm, Andreas Walker, Tobias Wienemann |                                                         |            |                                                                                           |
| EPI_ISL_417458                                                                            | hCoV-19/Germany/NRW-13/2020                                                                                                                                                                                                                               | Europe / Germany / North Rhine Westphalia / Duesseldorf | 2020-03-11 | Center of Medical Microbiology, Virology, and Hospital Hygiene, University of Duesseldorf |
| Center of Medical Microbiology, Virology, and Hospital Hygiene, University of Duesseldorf | Ortwin Adams, Marcel Andree, Alexander Dilthey, Torsten Feldt, Sandra Hauka, Torsten Houwaart, Björn-Erik Jensen, Detlef Kindgen-Milles, Malte Kohns Vasconcelos, Klaus Pfeiffer, Tina Senff, Daniel Strelow, Jörg Timm, Andreas Walker, Tobias Wienemann |                                                         |            |                                                                                           |
| EPI_ISL_417459                                                                            | hCoV-19/Germany/NRW-14/2020                                                                                                                                                                                                                               | Europe / Germany / North Rhine Westphalia / Duesseldorf | 2020-03-11 | Center of Medical Microbiology, Virology, and Hospital Hygiene, University of Duesseldorf |
| Center of Medical Microbiology, Virology, and Hospital Hygiene, University of Duesseldorf | Ortwin Adams, Marcel Andree, Alexander Dilthey, Torsten Feldt, Sandra Hauka, Torsten Houwaart, Björn-Erik Jensen, Detlef Kindgen-Milles, Malte Kohns Vasconcelos, Klaus Pfeiffer, Tina Senff, Daniel Strelow, Jörg Timm, Andreas Walker, Tobias Wienemann |                                                         |            |                                                                                           |
| EPI_ISL_417460                                                                            | hCoV-19/Germany/NRW-15/2020                                                                                                                                                                                                                               | Europe / Germany / North Rhine Westphalia / Duesseldorf | 2020-03-11 | Center of Medical Microbiology, Virology, and Hospital Hygiene, University of Duesseldorf |
| Center of Medical Microbiology, Virology, and Hospital Hygiene, University of Duesseldorf | Ortwin Adams, Marcel Andree, Alexander Dilthey, Torsten Feldt, Sandra Hauka, Torsten Houwaart, Björn-Erik Jensen, Detlef Kindgen-Milles, Malte Kohns Vasconcelos, Klaus Pfeiffer, Tina Senff, Daniel Strelow, Jörg Timm, Andreas Walker, Tobias Wienemann |                                                         |            |                                                                                           |
| EPI_ISL_417461                                                                            | hCoV-19/Germany/NRW-16/2020                                                                                                                                                                                                                               | Europe / Germany / North Rhine Westphalia / Duesseldorf | 2020-03-11 | Center of Medical Microbiology, Virology, and Hospital Hygiene, University of Duesseldorf |
| Center of Medical Microbiology, Virology, and Hospital Hygiene, University of Duesseldorf | Ortwin Adams, Marcel Andree, Alexander Dilthey, Torsten Feldt, Sandra Hauka, Torsten Houwaart, Björn-Erik Jensen, Detlef Kindgen-Milles, Malte Kohns Vasconcelos, Klaus Pfeiffer, Tina Senff, Daniel Strelow, Jörg Timm, Andreas Walker, Tobias Wienemann |                                                         |            |                                                                                           |
| EPI_ISL_417462                                                                            | hCoV-19/Germany/NRW-17/2020                                                                                                                                                                                                                               | Europe / Germany / North Rhine Westphalia / Duesseldorf | 2020-03-11 | Center of Medical Microbiology, Virology, and Hospital Hygiene, University of Duesseldorf |
| Center of Medical Microbiology, Virology, and Hospital Hygiene, University of Duesseldorf | Ortwin Adams, Marcel Andree, Alexander Dilthey, Torsten Feldt, Sandra Hauka, Torsten Houwaart, Björn-Erik Jensen, Detlef Kindgen-Milles, Malte Kohns Vasconcelos, Klaus Pfeiffer, Tina Senff, Daniel Strelow, Jörg Timm, Andreas Walker, Tobias Wienemann |                                                         |            |                                                                                           |
| EPI_ISL_417463                                                                            | hCoV-19/Germany/NRW-18/2020                                                                                                                                                                                                                               | Europe / Germany / North Rhine Westphalia / Duesseldorf | 2020-03-13 | Center of Medical Microbiology, Virology, and Hospital Hygiene, University of Duesseldorf |
| Center of Medical Microbiology, Virology, and Hospital Hygiene, University of Duesseldorf | Ortwin Adams, Marcel Andree, Alexander Dilthey, Torsten Feldt, Sandra Hauka, Torsten Houwaart, Björn-Erik Jensen, Detlef Kindgen-Milles, Malte Kohns Vasconcelos, Klaus Pfeiffer, Tina Senff, Daniel Strelow, Jörg Timm, Andreas Walker, Tobias Wienemann |                                                         |            |                                                                                           |
| EPI_ISL_417464                                                                            | hCoV-19/Germany/NRW-19/2020                                                                                                                                                                                                                               | Europe / Germany / North Rhine Westphalia / Duesseldorf | 2020-03-14 | Center of Medical Microbiology, Virology, and Hospital Hygiene, University of Duesseldorf |
| Center of Medical Microbiology, Virology, and Hospital Hygiene, University of Duesseldorf | Ortwin Adams, Marcel Andree, Alexander Dilthey, Torsten Feldt, Sandra Hauka, Torsten Houwaart, Björn-Erik Jensen, Detlef Kindgen-Milles, Malte Kohns Vasconcelos, Klaus Pfeiffer, Tina Senff, Daniel Strelow, Jörg Timm, Andreas Walker, Tobias           |                                                         |            |                                                                                           |

Wienemann  
EPI\_ISL\_417465 hCoV-19/Germany/NRW-20/2020 Europe / Germany / North Rhine Westphalia / Duesseldorf 2020-03-14 Center of Medical Microbiology, Virology, and Hospital Hygiene, University of Duesseldorf Center of Medical Microbiology, Virology, and Hospital Hygiene, University of Duesseldorf Ortwin Adams, Marcel Andree, Alexander Dilthey, Torsten Feldt, Sandra Hauka, Torsten Houwaart, Björn-Erik Jensen, Detlef Kindgen-Milles, Malte Kohns Vasconcelos, Klaus Pfeffer, Tina Senff, Daniel Strelow, Jörg Timm, Andreas Walker, Tobias Wienemann

EPI\_ISL\_417466 hCoV-19/Germany/NRW-21/2020 Europe / Germany / North Rhine Westphalia / Duesseldorf 2020-03-14 Center of Medical Microbiology, Virology, and Hospital Hygiene, University of Duesseldorf Center of Medical Microbiology, Virology, and Hospital Hygiene, University of Duesseldorf Ortwin Adams, Marcel Andree, Alexander Dilthey, Torsten Feldt, Sandra Hauka, Torsten Houwaart, Björn-Erik Jensen, Detlef Kindgen-Milles, Malte Kohns Vasconcelos, Klaus Pfeffer, Tina Senff, Daniel Strelow, Jörg Timm, Andreas Walker, Tobias Wienemann

EPI\_ISL\_417467 hCoV-19/Germany/NRW-22/2020 Europe / Germany / North Rhine Westphalia / Duesseldorf 2020-03-15 Center of Medical Microbiology, Virology, and Hospital Hygiene, University of Duesseldorf Center of Medical Microbiology, Virology, and Hospital Hygiene, University of Duesseldorf Ortwin Adams, Marcel Andree, Alexander Dilthey, Torsten Feldt, Sandra Hauka, Torsten Houwaart, Björn-Erik Jensen, Detlef Kindgen-Milles, Malte Kohns Vasconcelos, Klaus Pfeffer, Tina Senff, Daniel Strelow, Jörg Timm, Andreas Walker, Tobias Wienemann

EPI\_ISL\_417468 hCoV-19/Germany/NRW-23/2020 Europe / Germany / North Rhine Westphalia / Duesseldorf 2020-03-16 Center of Medical Microbiology, Virology, and Hospital Hygiene, University of Duesseldorf Center of Medical Microbiology, Virology, and Hospital Hygiene, University of Duesseldorf Ortwin Adams, Marcel Andree, Alexander Dilthey, Torsten Feldt, Sandra Hauka, Torsten Houwaart, Björn-Erik Jensen, Detlef Kindgen-Milles, Malte Kohns Vasconcelos, Klaus Pfeffer, Tina Senff, Daniel Strelow, Jörg Timm, Andreas Walker, Tobias Wienemann

EPI\_ISL\_417469 hCoV-19/USA/MN31-MDH31/2020 North America / USA / Minnesota 2020-03-12 Minnesota Department of Health, Public Health Laboratory Minnesota Department of Health, Public Health Laboratory Matt Plumb, Jake Garfin and Xiong Wang

EPI\_ISL\_417470 hCoV-19/USA/MN32-MDH32/2020 North America / USA / Minnesota 2020-03-12 Minnesota Department of Health, Public Health Laboratory Minnesota Department of Health, Public Health Laboratory Matt Plumb, Jake Garfin and Xiong Wang

EPI\_ISL\_417471 hCoV-19/USA/MN34-MDH34/2020 North America / USA / Minnesota 2020-03-12 Minnesota Department of Health, Public Health Laboratory Minnesota Department of Health, Public Health Laboratory Matt Plumb, Jake Garfin and Xiong Wang

EPI\_ISL\_417472 hCoV-19/USA/MN35-MDH35/2020 North America / USA / Minnesota 2020-03-12 Minnesota Department of Health, Public Health Laboratory Minnesota Department of Health, Public Health Laboratory Matt Plumb, Jake Garfin and Xiong Wang

EPI\_ISL\_417473 hCoV-19/USA/MN36-MDH36/2020 North America / USA / Minnesota 2020-03-13 Minnesota Department of Health, Public Health Laboratory Minnesota Department of Health, Public Health Laboratory Matt Plumb, Jake Garfin and Xiong Wang

EPI\_ISL\_417474 hCoV-19/USA/MN38-MDH38/2020 North America / USA / Minnesota 2020-03-12 Minnesota Department of Health, Public Health Laboratory Minnesota Department of Health, Public Health Laboratory Matt Plumb, Jake Garfin and Xiong Wang

EPI\_ISL\_417475 hCoV-19/USA/MN39-MDH39/2020 North America / USA / Minnesota 2020-03-12 Minnesota Department of Health, Public Health Laboratory Minnesota Department of Health, Public Health Laboratory Matt Plumb, Jake Garfin and Xiong Wang

EPI\_ISL\_417476 hCoV-19/USA/MN40-MDH40/2020 North America / USA / Minnesota 2020-03-12 Minnesota Department of Health, Public Health Laboratory Minnesota Department of Health, Public Health Laboratory Matt Plumb, Jake Garfin and Xiong Wang

EPI\_ISL\_417477 hCoV-19/USA/MN41-MDH41/2020 North America / USA / Minnesota 2020-03-12 Minnesota Department of Health, Public Health Laboratory Minnesota Department of Health, Public Health Laboratory Matt Plumb, Jake Garfin and Xiong Wang

EPI\_ISL\_417478 hCoV-19/USA/MN42-MDH42/2020 North America / USA / Minnesota 2020-03-13 Minnesota Department of Health, Public Health Laboratory Minnesota Department of Health, Public Health Laboratory Matt Plumb, Jake Garfin and Xiong Wang

EPI\_ISL\_417479 hCoV-19/USA/MN43-MDH43/2020 North America / USA / Minnesota 2020-03-12 Minnesota Department of Health, Public Health Laboratory Minnesota Department of Health, Public Health Laboratory Matt Plumb, Jake Garfin and Xiong Wang

EPI\_ISL\_417480 hCoV-19/USA/MN44-MDH44/2020 North America / USA / Minnesota 2020-03-12 Minnesota Department of Health, Public Health Laboratory Minnesota Department of Health, Public Health Laboratory Matt Plumb, Jake Garfin and Xiong Wang

EPI\_ISL\_417481 hCoV-19/Iceland/LUH-01/2020 Europe / Iceland / Reykjavik 2020-03-13 deCODE genetics deCODE genetics Daniel F Gudbjartsson, Agnar Helgason, Hakon Jonsson, Olafur T Magnusson, Pall Melsted, Gudmundur L Norddahl, Jona Saemundsdottir, Asgeir Sigurdsson, Patrick Sulem, Arna B Agustsdottir, Berglind Eiriksdottir, Run Fridriksdottir, Elisabet E Gardarsdottir, Gudmundur Georgsson, Olafia S Gretarsdottir, Kjartan R Gudmundsson, Thora R Gunnarsdottir, Arnaldur Gylfason, Hilma Holm, Brynjar O Jensson, Aslaug Jonasdottir, Kamilla S Josefsdottir, Thordur Kristjansson, Droplaug N Magnusdottir, Louise le Roux, Gudrun Sigmundsdottir, Gardar Sveinbjornsson, Kristin E Sveinsdottir, Maney Sveinsdottir, Emil A Thorarensen, Bjarni Thorbjornsson, Gisli Masson, Ingileif Jonsdottir, Alma Moller, Thorolfur Gudnason, Karl G Kristinsson, Unnur Thorsteinsdottir, Kari Stefansson

|                |                               |                                 |            |                                                                                                               |
|----------------|-------------------------------|---------------------------------|------------|---------------------------------------------------------------------------------------------------------------|
| EPI_ISL_417483 | hCoV-19/Norway/1379/2020      | Europe / Norway / Oslo          | 2020-02-27 | Oslo University Hospital, Department of Medical Microbiology                                                  |
| EPI_ISL_417484 | hCoV-19/Norway/1380/2020      | Europe / Norway / Oslo          | 2020-02-26 | Norwegian Institute of Public Health, Department of Virology                                                  |
| EPI_ISL_417485 | hCoV-19/Norway/1526/2020      | Europe / Norway / Oslo          | 2020-03-02 | University Hospital of Northern Norway, Department for Microbiology and Infectious Disease Control            |
| EPI_ISL_417486 | hCoV-19/Norway/1538/2020      | Europe / Norway / Oslo          | 2020-03-01 | Hospital of Southern Norway - Kristiansand, Department of Medical Microbiology                                |
| EPI_ISL_417487 | hCoV-19/Norway/1539/2020      | Europe / Norway / Oslo          | 2020-03-01 | Hospital of Southern Norway - Kristiansand, Department of Medical Microbiology                                |
| EPI_ISL_417488 | hCoV-19/Norway/1493/2020      | Europe / Norway / Oslo          | 2020-02-29 | Oslo University Hospital, Department of Medical Microbiology                                                  |
| EPI_ISL_417491 | hCoV-19/Italy/UnivPM1/2020    | Europe / Italy / Marche         | 2020-03-03 | Virology Laboratory, Department of Biomedical Sciences and Public Health, University Politecnica delle Marche |
| EPI_ISL_417492 | hCoV-19/USA/MN45-MDH45/2020   | North America / USA / Minnesota | 2020-03-13 | Minnesota Department of Health, Public Health Laboratory                                                      |
| EPI_ISL_417493 | hCoV-19/USA/MN46-MDH46/2020   | North America / USA / Minnesota | 2020-03-13 | Minnesota Department of Health, Public Health Laboratory                                                      |
| EPI_ISL_417494 | hCoV-19/USA/MN47-MDH47/2020   | North America / USA / Minnesota | 2020-03-13 | Minnesota Department of Health, Public Health Laboratory                                                      |
| EPI_ISL_417495 | hCoV-19/USA/MN48-MDH48/2020   | North America / USA / Minnesota | 2020-03-13 | Minnesota Department of Health, Public Health Laboratory                                                      |
| EPI_ISL_417496 | hCoV-19/USA/MN51-MDH51/2020   | North America / USA / Minnesota | 2020-03-13 | Minnesota Department of Health, Public Health Laboratory                                                      |
| EPI_ISL_417497 | hCoV-19/USA/MN52-MDH52/2020   | North America / USA / Minnesota | 2020-03-13 | Minnesota Department of Health, Public Health Laboratory                                                      |
| EPI_ISL_417498 | hCoV-19/USA/MN53-MDH53/2020   | North America / USA / Minnesota | 2020-03-13 | Minnesota Department of Health, Public Health Laboratory                                                      |
| EPI_ISL_417499 | hCoV-19/USA/MN55-MDH55/2020   | North America / USA / Minnesota | 2020-03-13 | Minnesota Department of Health, Public Health Laboratory                                                      |
| EPI_ISL_418624 | hCoV-19/Belgium/ULG-6972/2020 | Europe / Belgium / Liège        | 2020-03-15 | Department of Clinical Microbiology GIGA Medical Genomics                                                     |
| EPI_ISL_418625 | hCoV-19/Belgium/ULG-6688/2020 | Europe / Belgium / Liège        | 2020-03-14 | Department of Clinical Microbiology GIGA Medical Genomics                                                     |
| EPI_ISL_418626 | hCoV-19/Belgium/ULG-7242/2020 | Europe / Belgium / Liège        | 2020-03-16 | Department of Clinical Microbiology GIGA Medical Genomics                                                     |
| EPI_ISL_418627 | hCoV-19/Belgium/ULG-6743/2020 | Europe / Belgium / Liège        | 2020-03-14 | Department of Clinical Microbiology GIGA Medical Genomics                                                     |
| EPI_ISL_418628 | hCoV-19/Belgium/ULG-7134/2020 | Europe / Belgium / Liège        | 2020-03-16 | Department of Clinical Microbiology GIGA Medical Genomics                                                     |
| EPI_ISL_418629 | hCoV-19/Belgium/ULG-7773/2020 | Europe / Belgium / Liège        | 2020-03-17 | Department of Clinical Microbiology GIGA Medical Genomics                                                     |
| EPI_ISL_418630 | hCoV-19/Belgium/ULG-7729/2020 | Europe / Belgium / Liège        | 2020-03-17 | Department of Clinical Microbiology GIGA Medical Genomics                                                     |





Clinical Microbiology GIGA Medical Genomics Keith Durkin, Maria Artesi, Sébastien Bontems, Raphaël Boreux, Cécile Meex, Pierrette Melin, Marie-Pierre Hayette, Vincent Bours.

EPI\_ISL\_418663 hCoV-19/Belgium/ULG-9739/2020 Europe / Belgium / Liège 2020-03-22 Department of Clinical Microbiology GIGA Medical Genomics Keith Durkin, Maria Artesi, Sébastien Bontems, Raphaël Boreux, Cécile Meex, Pierrette Melin, Marie-Pierre Hayette, Vincent Bours.

EPI\_ISL\_418664 hCoV-19/Belgium/ULG-9741/2020 Europe / Belgium / Liège 2020-03-22 Department of Clinical Microbiology GIGA Medical Genomics Keith Durkin, Maria Artesi, Sébastien Bontems, Raphaël Boreux, Cécile Meex, Pierrette Melin, Marie-Pierre Hayette, Vincent Bours.

EPI\_ISL\_418667 hCoV-19/England/20109047803/2020 Europe / United Kingdom / England 2020-03-07 Respiratory Virus Unit, Microbiology Services Colindale, Public Health England Respiratory Virus Unit, Microbiology Services Colindale, Public Health England Monica Galiano, Shahjahan Miah, Angie Lackenby, Omolola Akinbami, Tiina Talts, Leena Bhaw, Richard Myers, Steven Platt, Kirstin Edwards, Jonathan Hubb, Joanna Ellis, Maria Zambon

EPI\_ISL\_418668 hCoV-19/England/20110136302/2020 Europe / United Kingdom / England 2020-03-09 Respiratory Virus Unit, Microbiology Services Colindale, Public Health England Respiratory Virus Unit, Microbiology Services Colindale, Public Health England Monica Galiano, Shahjahan Miah, Angie Lackenby, Omolola Akinbami, Tiina Talts, Leena Bhaw, Richard Myers, Steven Platt, Kirstin Edwards, Jonathan Hubb, Joanna Ellis, Maria Zambon

EPI\_ISL\_418669 hCoV-19/England/20116022902/2020 Europe / United Kingdom / England 2020-03-11 Respiratory Virus Unit, Microbiology Services Colindale, Public Health England Respiratory Virus Unit, Microbiology Services Colindale, Public Health England Monica Galiano, Shahjahan Miah, Angie Lackenby, Omolola Akinbami, Tiina Talts, Leena Bhaw, Richard Myers, Steven Platt, Kirstin Edwards, Jonathan Hubb, Joanna Ellis, Maria Zambon

EPI\_ISL\_418670 hCoV-19/England/20116025603/2020 Europe / United Kingdom / England 2020-03-11 Respiratory Virus Unit, Microbiology Services Colindale, Public Health England Respiratory Virus Unit, Microbiology Services Colindale, Public Health England Monica Galiano, Shahjahan Miah, Angie Lackenby, Omolola Akinbami, Tiina Talts, Leena Bhaw, Richard Myers, Steven Platt, Kirstin Edwards, Jonathan Hubb, Joanna Ellis, Maria Zambon

EPI\_ISL\_418671 hCoV-19/England/20119026102/2020 Europe / United Kingdom / England 2020-03-13 Respiratory Virus Unit, Microbiology Services Colindale, Public Health England Respiratory Virus Unit, Microbiology Services Colindale, Public Health England Monica Galiano, Shahjahan Miah, Angie Lackenby, Omolola Akinbami, Tiina Talts, Leena Bhaw, Richard Myers, Steven Platt, Kirstin Edwards, Jonathan Hubb, Joanna Ellis, Maria Zambon

EPI\_ISL\_418672 hCoV-19/England/20120002102/2020 Europe / United Kingdom / England 2020-03-15 Respiratory Virus Unit, Microbiology Services Colindale, Public Health England Respiratory Virus Unit, Microbiology Services Colindale, Public Health England Monica Galiano, Shahjahan Miah, Angie Lackenby, Omolola Akinbami, Tiina Talts, Leena Bhaw, Richard Myers, Steven Platt, Kirstin Edwards, Jonathan Hubb, Joanna Ellis, Maria Zambon

EPI\_ISL\_418673 hCoV-19/England/20122032802/2020 Europe / United Kingdom / England 2020-03-16 Respiratory Virus Unit, Microbiology Services Colindale, Public Health England Respiratory Virus Unit, Microbiology Services Colindale, Public Health England Monica Galiano, Shahjahan Miah, Angie Lackenby, Omolola Akinbami, Tiina Talts, Leena Bhaw, Richard Myers, Steven Platt, Kirstin Edwards, Jonathan Hubb, Joanna Ellis, Maria Zambon

EPI\_ISL\_418675 hCoV-19/England/20122073102/2020 Europe / United Kingdom / England 2020-03-16 Respiratory Virus Unit, Microbiology Services Colindale, Public Health England Respiratory Virus Unit, Microbiology Services Colindale, Public Health England Monica Galiano, Shahjahan Miah, Angie Lackenby, Omolola Akinbami, Tiina Talts, Leena Bhaw, Richard Myers, Steven Platt, Kirstin Edwards, Jonathan Hubb, Joanna Ellis, Maria Zambon

EPI\_ISL\_418676 hCoV-19/England/20122074602/2020 Europe / United Kingdom / England 2020-03-10 Respiratory Virus Unit, Microbiology Services Colindale, Public Health England Respiratory Virus Unit, Microbiology Services Colindale, Public Health England Monica Galiano, Shahjahan Miah, Angie Lackenby, Omolola Akinbami, Tiina Talts, Leena Bhaw, Richard Myers, Steven Platt, Kirstin Edwards, Jonathan Hubb, Joanna Ellis, Maria Zambon

EPI\_ISL\_418677 hCoV-19/England/20122087702/2020 Europe / United Kingdom / England 2020-03-15 Respiratory Virus Unit, Microbiology Services Colindale, Public Health England Respiratory Virus Unit, Microbiology Services Colindale, Public Health England Monica Galiano, Shahjahan Miah, Angie Lackenby, Omolola Akinbami, Tiina Talts, Leena Bhaw, Richard Myers, Steven Platt, Kirstin Edwards, Jonathan Hubb, Joanna Ellis, Maria Zambon

EPI\_ISL\_418678 hCoV-19/England/20122088102/2020 Europe / United Kingdom / England 2020-03-16 Respiratory Virus Unit, Microbiology Services Colindale, Public Health England Respiratory Virus Unit, Microbiology Services Colindale, Public Health England Monica Galiano, Shahjahan Miah, Angie Lackenby, Omolola Akinbami, Tiina Talts, Leena Bhaw, Richard Myers, Steven Platt, Kirstin Edwards, Jonathan Hubb, Joanna Ellis, Maria Zambon

EPI\_ISL\_418679 hCoV-19/England/20122119202/2020 Europe / United Kingdom / England 2020-03-17 Respiratory Virus Unit, Microbiology Services Colindale, Public Health England Respiratory Virus Unit, Microbiology Services Colindale, Public Health England Monica Galiano, Shahjahan Miah, Angie Lackenby, Omolola Akinbami, Tiina Talts, Leena Bhaw, Richard Myers, Steven Platt, Kirstin Edwards, Jonathan Hubb, Joanna Ellis, Maria Zambon

EPI\_ISL\_418680 hCoV-19/England/20122119302/2020 Europe / United Kingdom / England 2020-03-17 Respiratory Virus Unit, Microbiology Services Colindale, Public Health England Respiratory Virus Unit,



Microbiology Services Colindale, Public Health England Monica Galiano, Shahjahan Miah, Angie Lackenby, Omolola Akinbami, Tiina Talts, Leena Bhaw, Richard Myers, Steven Platt, Kirstin Edwards, Jonathan Hubb, Joanna Ellis, Maria Zambon

EPI\_ISL\_418715 hCoV-19/England/20124035802/2020 Europe / United Kingdom / England 2020-03-17  
Respiratory Virus Unit, Microbiology Services Colindale, Public Health England Respiratory Virus Unit, Microbiology Services Colindale, Public Health England Monica Galiano, Shahjahan Miah, Angie Lackenby, Omolola Akinbami, Tiina Talts, Leena Bhaw, Richard Myers, Steven Platt, Kirstin Edwards, Jonathan Hubb, Joanna Ellis, Maria Zambon

EPI\_ISL\_418716 hCoV-19/England/20124036002/2020 Europe / United Kingdom / England 2020-03-17  
Respiratory Virus Unit, Microbiology Services Colindale, Public Health England Respiratory Virus Unit, Microbiology Services Colindale, Public Health England Monica Galiano, Shahjahan Miah, Angie Lackenby, Omolola Akinbami, Tiina Talts, Leena Bhaw, Richard Myers, Steven Platt, Kirstin Edwards, Jonathan Hubb, Joanna Ellis, Maria Zambon

EPI\_ISL\_418739 hCoV-19/England/20124101102/2020 Europe / United Kingdom / England 2020-03-18  
Respiratory Virus Unit, Microbiology Services Colindale, Public Health England Respiratory Virus Unit, Microbiology Services Colindale, Public Health England Monica Galiano, Shahjahan Miah, Angie Lackenby, Omolola Akinbami, Tiina Talts, Leena Bhaw, Richard Myers, Steven Platt, Kirstin Edwards, Jonathan Hubb, Joanna Ellis, Maria Zambon

EPI\_ISL\_418749 hCoV-19/England/20126006802/2020 Europe / United Kingdom / England 2020-03-18  
Respiratory Virus Unit, Microbiology Services Colindale, Public Health England Respiratory Virus Unit, Microbiology Services Colindale, Public Health England Monica Galiano, Shahjahan Miah, Angie Lackenby, Omolola Akinbami, Tiina Talts, Leena Bhaw, Richard Myers, Steven Platt, Kirstin Edwards, Jonathan Hubb, Joanna Ellis, Maria Zambon

EPI\_ISL\_418751 hCoV-19/England/20126007102/2020 Europe / United Kingdom / England 2020-03-18  
Respiratory Virus Unit, Microbiology Services Colindale, Public Health England Respiratory Virus Unit, Microbiology Services Colindale, Public Health England Monica Galiano, Shahjahan Miah, Angie Lackenby, Omolola Akinbami, Tiina Talts, Leena Bhaw, Richard Myers, Steven Platt, Kirstin Edwards, Jonathan Hubb, Joanna Ellis, Maria Zambon

EPI\_ISL\_418756 hCoV-19/England/20126012702/2020 Europe / United Kingdom / England 2020-03-17  
Respiratory Virus Unit, Microbiology Services Colindale, Public Health England Respiratory Virus Unit, Microbiology Services Colindale, Public Health England Monica Galiano, Shahjahan Miah, Angie Lackenby, Omolola Akinbami, Tiina Talts, Leena Bhaw, Richard Myers, Steven Platt, Kirstin Edwards, Jonathan Hubb, Joanna Ellis, Maria Zambon

EPI\_ISL\_418764 hCoV-19/England/20126035502/2020 Europe / United Kingdom / England 2020-03-18  
Respiratory Virus Unit, Microbiology Services Colindale, Public Health England Respiratory Virus Unit, Microbiology Services Colindale, Public Health England Monica Galiano, Shahjahan Miah, Angie Lackenby, Omolola Akinbami, Tiina Talts, Leena Bhaw, Richard Myers, Steven Platt, Kirstin Edwards, Jonathan Hubb, Joanna Ellis, Maria Zambon

EPI\_ISL\_418770 hCoV-19/England/20126096602/2020 Europe / United Kingdom / England 2020-03-18  
Respiratory Virus Unit, Microbiology Services Colindale, Public Health England Respiratory Virus Unit, Microbiology Services Colindale, Public Health England Monica Galiano, Shahjahan Miah, Angie Lackenby, Omolola Akinbami, Tiina Talts, Leena Bhaw, Richard Myers, Steven Platt, Kirstin Edwards, Jonathan Hubb, Joanna Ellis, Maria Zambon

EPI\_ISL\_418771 hCoV-19/USA/WA-NH2/2020 North America / USA / Washington 2020-03-13 WA State  
Department of Health Pathogen Discovery, Respiratory Viruses Branch, Division of Viral Diseases, Centers for Disease Control and Prevention Jing Zhang, Ying Tao, Clinton R. Paden, Krista Queen, Anna Uehara, Yan Li, Haibin Wang, Jessica Jacobs, Denny Russell, Brian Hiatt, Jessica Gant, Suxiang Tong

EPI\_ISL\_418772 hCoV-19/USA/WA-NH3/2020 North America / USA / Washington 2020-03-13 WA State  
Department of Health Pathogen Discovery, Respiratory Viruses Branch, Division of Viral Diseases, Centers for Disease Control and Prevention Jing Zhang, Ying Tao, Clinton R. Paden, Krista Queen, Anna Uehara, Yan Li, Haibin Wang, Jessica Jacobs, Denny Russell, Brian Hiatt, Jessica Gant, Suxiang Tong

EPI\_ISL\_418773 hCoV-19/USA/WA-NH4/2020 North America / USA / Washington 2020-03-13 WA State  
Department of Health Pathogen Discovery, Respiratory Viruses Branch, Division of Viral Diseases, Centers for Disease Control and Prevention Jing Zhang, Ying Tao, Clinton R. Paden, Krista Queen, Anna Uehara, Yan Li, Haibin Wang, Jessica Jacobs, Denny Russell, Brian Hiatt, Jessica Gant, Suxiang Tong

EPI\_ISL\_418774 hCoV-19/USA/WA-NH5/2020 North America / USA / Washington 2020-03-13 WA State  
Department of Health Pathogen Discovery, Respiratory Viruses Branch, Division of Viral Diseases, Centers for Disease Control and Prevention Jing Zhang, Ying Tao, Clinton R. Paden, Krista Queen, Anna Uehara, Yan Li, Haibin Wang, Jessica Jacobs, Denny Russell, Brian Hiatt, Jessica Gant, Suxiang Tong

EPI\_ISL\_418775 hCoV-19/USA/WA-NH6/2020 North America / USA / Washington 2020-03-13 WA State  
Department of Health Pathogen Discovery, Respiratory Viruses Branch, Division of Viral Diseases, Centers for Disease Control and Prevention Jing Zhang, Ying Tao, Clinton R. Paden, Krista Queen, Anna Uehara, Yan Li, Haibin Wang, Jessica Jacobs, Denny Russell, Brian Hiatt, Jessica Gant, Suxiang Tong

EPI\_ISL\_418776 hCoV-19/USA/WA-NH7/2020 North America / USA / Washington 2020-03-13 WA State  
Department of Health Pathogen Discovery, Respiratory Viruses Branch, Division of Viral Diseases, Centers for Disease Control and Prevention Jing Zhang, Ying Tao, Clinton R. Paden, Krista Queen, Anna Uehara, Yan Li, Haibin Wang, Jessica Jacobs, Denny Russell, Brian Hiatt, Jessica Gant, Suxiang Tong

EPI\_ISL\_418777 hCoV-19/USA/WA-NH8/2020 North America / USA / Washington 2020-03-13 WA State  
Department of Health Pathogen Discovery, Respiratory Viruses Branch, Division of Viral Diseases, Centers for Disease Control and Prevention Jing Zhang, Ying Tao, Clinton R. Paden, Krista Queen, Anna Uehara, Yan Li,



| Leuven, Clinical and Epidemiological Virology            | KU Leuven, Clinical and Epidemiological Virology                                                                                                                                                                                                                                                                                                                                               | Bert                                                            |
|----------------------------------------------------------|------------------------------------------------------------------------------------------------------------------------------------------------------------------------------------------------------------------------------------------------------------------------------------------------------------------------------------------------------------------------------------------------|-----------------------------------------------------------------|
| Vanmechelen, Joan Marti-Carreras, Tony Wawina, Piet Maes |                                                                                                                                                                                                                                                                                                                                                                                                |                                                                 |
| EPI_ISL_418798 hCoV-19/Belgium/GS-030549/2020            | Europe / Belgium / Chainex                                                                                                                                                                                                                                                                                                                                                                     | 2020-03-05 KU Leuven, Bert                                      |
| Clinical and Epidemiological Virology                    | KU Leuven, Clinical and Epidemiological Virology                                                                                                                                                                                                                                                                                                                                               |                                                                 |
| Vanmechelen, Joan Marti-Carreras, Tony Wawina, Piet Maes |                                                                                                                                                                                                                                                                                                                                                                                                |                                                                 |
| EPI_ISL_418799 hCoV-19/Australia/QLDID922/2020           | Oceania / Australia / Queensland / Brisbane                                                                                                                                                                                                                                                                                                                                                    | 2020-02-28                                                      |
| Mater Pathology Public Health Virology Laboratory        | Bixing Huang, Alyssa Pyke, Amanda De Jong, Andrew Van Den Hurk, Carmel Taylor, David Warrilow, Doris Genge, Elisabeth Gamez, Glen Hewitson, Ian Maxwell Mackay, Inga Sultana, Jamie McMahon, Jean Barcelon, Judy Northill, Mitchell Finger, Natalie Simpson, Neelima Nair, Peter Burtonclay, Peter Moore, Sarah Wheatley, Sean Moody, Sonja Hall-Mendelin, Timothy Gardam, and Frederick Moore |                                                                 |
| EPI_ISL_419900 hCoV-19/Australia/VIC205/2020             | Oceania / Australia / Victoria                                                                                                                                                                                                                                                                                                                                                                 | 2020-03-19 Victorian                                            |
| Infectious Diseases Reference Laboratory (VIDRL)         | Victorian Infectious Diseases Reference Laboratory and Microbiological Diagnostic Unit Public Health Laboratory, Doherty Institute                                                                                                                                                                                                                                                             | Caly L., Seemann T., Sait, M., Schultz M., Druce J., Sherry, N. |
| EPI_ISL_419901 hCoV-19/Australia/VIC206/2020             | Oceania / Australia / Victoria                                                                                                                                                                                                                                                                                                                                                                 | 2020-03-19 Victorian                                            |
| Infectious Diseases Reference Laboratory (VIDRL)         | Victorian Infectious Diseases Reference Laboratory and Microbiological Diagnostic Unit Public Health Laboratory, Doherty Institute                                                                                                                                                                                                                                                             | Caly L., Seemann T., Sait, M., Schultz M., Druce J., Sherry, N. |
| EPI_ISL_419902 hCoV-19/Australia/VIC207/2020             | Oceania / Australia / Victoria                                                                                                                                                                                                                                                                                                                                                                 | 2020-03-19 Victorian                                            |
| Infectious Diseases Reference Laboratory (VIDRL)         | Victorian Infectious Diseases Reference Laboratory and Microbiological Diagnostic Unit Public Health Laboratory, Doherty Institute                                                                                                                                                                                                                                                             | Caly L., Seemann T., Sait, M., Schultz M., Druce J., Sherry, N. |
| EPI_ISL_419903 hCoV-19/Australia/VIC208/2020             | Oceania / Australia / Victoria                                                                                                                                                                                                                                                                                                                                                                 | 2020-03-20 Victorian                                            |
| Infectious Diseases Reference Laboratory (VIDRL)         | Victorian Infectious Diseases Reference Laboratory and Microbiological Diagnostic Unit Public Health Laboratory, Doherty Institute                                                                                                                                                                                                                                                             | Caly L., Seemann T., Sait, M., Schultz M., Druce J., Sherry, N. |
| EPI_ISL_419904 hCoV-19/Australia/VIC209/2020             | Oceania / Australia / Victoria                                                                                                                                                                                                                                                                                                                                                                 | 2020-03-20 Victorian                                            |
| Infectious Diseases Reference Laboratory (VIDRL)         | Victorian Infectious Diseases Reference Laboratory and Microbiological Diagnostic Unit Public Health Laboratory, Doherty Institute                                                                                                                                                                                                                                                             | Caly L., Seemann T., Sait, M., Schultz M., Druce J., Sherry, N. |
| EPI_ISL_419905 hCoV-19/Australia/VIC210/2020             | Oceania / Australia / Victoria                                                                                                                                                                                                                                                                                                                                                                 | 2020-03-20 Victorian                                            |
| Infectious Diseases Reference Laboratory (VIDRL)         | Victorian Infectious Diseases Reference Laboratory and Microbiological Diagnostic Unit Public Health Laboratory, Doherty Institute                                                                                                                                                                                                                                                             | Caly L., Seemann T., Sait, M., Schultz M., Druce J., Sherry, N. |
| EPI_ISL_419906 hCoV-19/Australia/VIC211/2020             | Oceania / Australia / Victoria                                                                                                                                                                                                                                                                                                                                                                 | 2020-03-20 Victorian                                            |
| Infectious Diseases Reference Laboratory (VIDRL)         | Victorian Infectious Diseases Reference Laboratory and Microbiological Diagnostic Unit Public Health Laboratory, Doherty Institute                                                                                                                                                                                                                                                             | Caly L., Seemann T., Sait, M., Schultz M., Druce J., Sherry, N. |
| EPI_ISL_419907 hCoV-19/Australia/VIC212/2020             | Oceania / Australia / Victoria                                                                                                                                                                                                                                                                                                                                                                 | 2020-03-20 Victorian                                            |
| Infectious Diseases Reference Laboratory (VIDRL)         | Victorian Infectious Diseases Reference Laboratory and Microbiological Diagnostic Unit Public Health Laboratory, Doherty Institute                                                                                                                                                                                                                                                             | Caly L., Seemann T., Sait, M., Schultz M., Druce J., Sherry, N. |
| EPI_ISL_419908 hCoV-19/Australia/VIC213/2020             | Oceania / Australia / Victoria                                                                                                                                                                                                                                                                                                                                                                 | 2020-03-20 Victorian                                            |
| Infectious Diseases Reference Laboratory (VIDRL)         | Victorian Infectious Diseases Reference Laboratory and Microbiological Diagnostic Unit Public Health Laboratory, Doherty Institute                                                                                                                                                                                                                                                             | Caly L., Seemann T., Sait, M., Schultz M., Druce J., Sherry, N. |
| EPI_ISL_419909 hCoV-19/Australia/VIC214/2020             | Oceania / Australia / Victoria                                                                                                                                                                                                                                                                                                                                                                 | 2020-03-20 Victorian                                            |
| Infectious Diseases Reference Laboratory (VIDRL)         | Victorian Infectious Diseases Reference Laboratory and Microbiological Diagnostic Unit Public Health Laboratory, Doherty Institute                                                                                                                                                                                                                                                             | Caly L., Seemann T., Sait, M., Schultz M., Druce J., Sherry, N. |
| EPI_ISL_419910 hCoV-19/Australia/VIC215/2020             | Oceania / Australia / Victoria                                                                                                                                                                                                                                                                                                                                                                 | 2020-03-20 Victorian                                            |
| Infectious Diseases Reference Laboratory (VIDRL)         | Victorian Infectious Diseases Reference Laboratory and Microbiological Diagnostic Unit Public Health Laboratory, Doherty Institute                                                                                                                                                                                                                                                             | Caly L., Seemann T., Sait, M., Schultz M., Druce J., Sherry, N. |
| EPI_ISL_419911 hCoV-19/Australia/VIC216/2020             | Oceania / Australia / Victoria                                                                                                                                                                                                                                                                                                                                                                 | 2020-03-20 Victorian                                            |
| Infectious Diseases Reference Laboratory (VIDRL)         | Victorian Infectious Diseases Reference Laboratory and Microbiological Diagnostic Unit Public Health Laboratory, Doherty Institute                                                                                                                                                                                                                                                             | Caly L., Seemann T., Sait, M., Schultz M., Druce J., Sherry, N. |
| EPI_ISL_419912 hCoV-19/Australia/VIC217/2020             | Oceania / Australia / Victoria                                                                                                                                                                                                                                                                                                                                                                 | 2020-03-20 Victorian                                            |
| Infectious Diseases Reference Laboratory (VIDRL)         | Victorian Infectious Diseases Reference Laboratory and Microbiological Diagnostic Unit Public Health Laboratory, Doherty Institute                                                                                                                                                                                                                                                             | Caly L., Seemann T., Sait, M., Schultz M., Druce J., Sherry, N. |
| EPI_ISL_419913 hCoV-19/Australia/VIC218/2020             | Oceania / Australia / Victoria                                                                                                                                                                                                                                                                                                                                                                 | 2020-03-20 Victorian                                            |
| Infectious Diseases Reference Laboratory (VIDRL)         | Victorian Infectious Diseases Reference Laboratory and Microbiological Diagnostic Unit Public Health Laboratory, Doherty Institute                                                                                                                                                                                                                                                             | Caly L., Seemann T., Sait, M., Schultz M., Druce J., Sherry, N. |
| EPI_ISL_419914 hCoV-19/Australia/VIC219/2020             | Oceania / Australia / Victoria                                                                                                                                                                                                                                                                                                                                                                 | 2020-03-20 Victorian                                            |
| Infectious Diseases Reference Laboratory (VIDRL)         | Victorian Infectious Diseases Reference Laboratory and Microbiological Diagnostic Unit Public Health Laboratory, Doherty Institute                                                                                                                                                                                                                                                             | Caly L., Seemann T., Sait, M., Schultz M., Druce J., Sherry, N. |













|                |                                   |                                   |            |                                                                                         |                                                                                          |                                                                                                                                                                                    |
|----------------|-----------------------------------|-----------------------------------|------------|-----------------------------------------------------------------------------------------|------------------------------------------------------------------------------------------|------------------------------------------------------------------------------------------------------------------------------------------------------------------------------------|
| EPI_ISL_420910 | hCoV-19/England/20136087804/2020  | Europe / United Kingdom / England | 2020-03-25 | Respiratory Virus Unit, Microbiology Services Colindale, Public Health England          | Respiratory Virus Unit, Microbiology Services Colindale, Public Health England           | Monica Galiano, Shahjahan Miah, Angie Lackenby, Omolola Akinbami, Tiina Talts, Leena Bhaw, Richard Myers, Steven Platt, Kirstin Edwards, Jonathan Hubb, Joanna Ellis, Maria Zambon |
| EPI_ISL_420912 | hCoV-19/Germany/BAV-V2012856/2020 | Europe / Germany / Munich         | 2020-03-21 | Pettenkofer Institute, Virology, National Reference Center for Retroviruses, LMU Munich | Laboratory for Functional Genome Analysis, Dept. Genomics, Gene Center of the LMU Munich | Max Muenchhoff, Stefan Krebs, Alexander Graf, Ashok Varadharajan, Oliver Keppler, Helmut Blum                                                                                      |
| EPI_ISL_420929 | hCoV-19/Wales/PHWC-25005/2020     | Europe / United Kingdom / Wales   | 2020-03-20 | Specialist Virology Centre                                                              | Public Health Wales Microbiology Cardiff                                                 | Catherine Moore, Joanne Watkins, Sally Corden, Malorie Perry, Simon Cottrell Sara Rey, Matt Bull, Tom Connor                                                                       |
| EPI_ISL_420937 | hCoV-19/Wales/PHWC-24CB7/2020     | Europe / United Kingdom / Wales   | 2020-03-21 | Specialist Virology Centre                                                              | Public Health Wales Microbiology Cardiff                                                 | Catherine Moore, Joanne Watkins, Sally Corden, Malorie Perry, Simon Cottrell Sara Rey, Matt Bull, Tom Connor                                                                       |
| EPI_ISL_420940 | hCoV-19/Wales/PHWC-24DD2/2020     | Europe / United Kingdom / Wales   | 2020-03-21 | Specialist Virology Centre                                                              | Public Health Wales Microbiology Cardiff                                                 | Catherine Moore, Joanne Watkins, Sally Corden, Malorie Perry, Simon Cottrell Sara Rey, Matt Bull, Tom Connor                                                                       |
| EPI_ISL_420943 | hCoV-19/Wales/PHWC-24F36/2020     | Europe / United Kingdom / Wales   | 2020-03-21 | Specialist Virology Centre                                                              | Public Health Wales Microbiology Cardiff                                                 | Catherine Moore, Joanne Watkins, Sally Corden, Malorie Perry, Simon Cottrell Sara Rey, Matt Bull, Tom Connor                                                                       |
| EPI_ISL_420944 | hCoV-19/Wales/PHWC-24FFA/2020     | Europe / United Kingdom / Wales   | 2020-03-21 | Specialist Virology Centre                                                              | Public Health Wales Microbiology Cardiff                                                 | Catherine Moore, Joanne Watkins, Sally Corden, Malorie Perry, Simon Cottrell Sara Rey, Matt Bull, Tom Connor                                                                       |
| EPI_ISL_420949 | hCoV-19/Wales/PHWC-2522D/2020     | Europe / United Kingdom / Wales   | 2020-03-21 | Specialist Virology Centre                                                              | Public Health Wales Microbiology Cardiff                                                 | Catherine Moore, Joanne Watkins, Sally Corden, Malorie Perry, Simon Cottrell Sara Rey, Matt Bull, Tom Connor                                                                       |
| EPI_ISL_420951 | hCoV-19/Wales/PHWC-24CF3/2020     | Europe / United Kingdom / Wales   | 2020-03-22 | Specialist Virology Centre                                                              | Public Health Wales Microbiology Cardiff                                                 | Catherine Moore, Joanne Watkins, Sally Corden, Malorie Perry, Simon Cottrell Sara Rey, Matt Bull, Tom Connor                                                                       |
| EPI_ISL_420960 | hCoV-19/Wales/PHWC-24F72/2020     | Europe / United Kingdom / Wales   | 2020-03-22 | Specialist Virology Centre                                                              | Public Health Wales Microbiology Cardiff                                                 | Catherine Moore, Joanne Watkins, Sally Corden, Malorie Perry, Simon Cottrell Sara Rey, Matt Bull, Tom Connor                                                                       |
| EPI_ISL_420961 | hCoV-19/Wales/PHWC-24F81/2020     | Europe / United Kingdom / Wales   | 2020-03-22 | Specialist Virology Centre                                                              | Public Health Wales Microbiology Cardiff                                                 | Catherine Moore, Joanne Watkins, Sally Corden, Malorie Perry, Simon Cottrell Sara Rey, Matt Bull, Tom Connor                                                                       |
| EPI_ISL_420969 | hCoV-19/Wales/PHWC-25111/2020     | Europe / United Kingdom / Wales   | 2020-03-22 | Specialist Virology Centre                                                              | Public Health Wales Microbiology Cardiff                                                 | Catherine Moore, Joanne Watkins, Sally Corden, Malorie Perry, Simon Cottrell Sara Rey, Matt Bull, Tom Connor                                                                       |
| EPI_ISL_420970 | hCoV-19/Wales/PHWC-25120/2020     | Europe / United Kingdom / Wales   | 2020-03-22 | Specialist Virology Centre                                                              | Public Health Wales Microbiology Cardiff                                                 | Catherine Moore, Joanne Watkins, Sally Corden, Malorie Perry, Simon Cottrell Sara Rey, Matt Bull, Tom Connor                                                                       |
| EPI_ISL_420974 | hCoV-19/Wales/PHWC-2516C/2020     | Europe / United Kingdom / Wales   | 2020-03-22 | Specialist Virology Centre                                                              | Public Health Wales Microbiology Cardiff                                                 | Catherine Moore, Joanne Watkins, Sally Corden, Malorie Perry, Simon Cottrell Sara Rey, Matt Bull, Tom Connor                                                                       |
| EPI_ISL_420976 | hCoV-19/Wales/PHWC-251B7/2020     | Europe / United Kingdom / Wales   | 2020-03-22 | Specialist Virology Centre                                                              | Public Health Wales Microbiology Cardiff                                                 | Catherine Moore, Joanne Watkins, Sally Corden, Malorie Perry, Simon Cottrell Sara Rey, Matt Bull, Tom Connor                                                                       |
| EPI_ISL_420977 | hCoV-19/Wales/PHWC-2523C/2020     | Europe / United Kingdom / Wales   | 2020-03-22 | Specialist Virology Centre                                                              | Public Health Wales Microbiology Cardiff                                                 | Catherine Moore, Joanne Watkins, Sally Corden, Malorie Perry, Simon Cottrell Sara Rey, Matt Bull, Tom Connor                                                                       |
| EPI_ISL_420978 | hCoV-19/Wales/PHWC-253B1/2020     | Europe / United Kingdom / Wales   | 2020-03-22 | Specialist Virology Centre                                                              | Public Health Wales Microbiology Cardiff                                                 | Catherine Moore, Joanne Watkins, Sally Corden, Malorie Perry, Simon Cottrell Sara Rey, Matt Bull, Tom Connor                                                                       |
| EPI_ISL_420982 | hCoV-19/Wales/PHWC-251D5/2020     | Europe / United Kingdom / Wales   | 2020-03-23 | Specialist Virology Centre                                                              | Public Health Wales Microbiology Cardiff                                                 | Catherine Moore, Joanne Watkins, Sally Corden, Malorie Perry, Simon Cottrell Sara Rey, Matt Bull, Tom Connor                                                                       |
| EPI_ISL_420985 | hCoV-19/Wales/PHWC-252B4/2020     | Europe / United Kingdom / Wales   | 2020-03-23 | Specialist Virology Centre                                                              | Public Health Wales Microbiology Cardiff                                                 | Catherine Moore, Joanne Watkins, Sally Corden, Malorie Perry, Simon Cottrell Sara Rey, Matt Bull, Tom Connor                                                                       |
| EPI_ISL_420988 | hCoV-19/Wales/PHWC-253DF/2020     | Europe / United Kingdom / Wales   | 2020-03-23 | Specialist Virology Centre                                                              | Public Health Wales Microbiology Cardiff                                                 | Catherine Moore, Joanne Watkins, Sally Corden, Malorie Perry, Simon Cottrell Sara Rey, Matt Bull, Tom Connor                                                                       |
| EPI_ISL_420990 | hCoV-19/Wales/PHWC-25418/2020     | Europe / United Kingdom / Wales   | 2020-03-23 | Specialist Virology Centre                                                              | Public Health Wales Microbiology Cardiff                                                 | Catherine Moore, Joanne Watkins, Sally Corden, Malorie Perry, Simon Cottrell Sara Rey, Matt Bull, Tom Connor                                                                       |
| EPI_ISL_420994 | hCoV-19/Wales/PHWC-25463/2020     | Europe / United Kingdom / Wales   | 2020-03-23 | Specialist Virology Centre                                                              | Public Health Wales Microbiology Cardiff                                                 | Catherine Moore, Joanne Watkins, Sally Corden, Malorie Perry, Simon Cottrell Sara Rey, Matt Bull, Tom Connor                                                                       |
| EPI_ISL_420995 | hCoV-19/Wales/PHWC-25472/2020     | Europe / United Kingdom / Wales   | 2020-03-23 | Specialist Virology Centre                                                              | Public Health Wales Microbiology Cardiff                                                 | Catherine Moore, Joanne Watkins, Sally Corden, Malorie Perry, Simon Cottrell Sara Rey, Matt Bull, Tom Connor                                                                       |













EPI\_ISL\_423265 hCoV-19/England/201360318/2020 Europe / United Kingdom / England 2020-03-25  
Respiratory Virus Unit, Microbiology Services Colindale, Public Health England Respiratory Virus Unit,  
Microbiology Services Colindale, Public Health England Monica Galiano, Shahjahan Miah, Angie Lackenby, Omolola  
Akinbami, Tiina Talts, Leena Bhaw, Richard Myers, Steven Platt, Kirstin Edwards, Jonathan Hubb, Joanna Ellis,  
Maria Zambon

EPI\_ISL\_423266 hCoV-19/England/201360538/2020 Europe / United Kingdom / England 2020-03-25  
Respiratory Virus Unit, Microbiology Services Colindale, Public Health England Respiratory Virus Unit,  
Microbiology Services Colindale, Public Health England Monica Galiano, Shahjahan Miah, Angie Lackenby, Omolola  
Akinbami, Tiina Talts, Leena Bhaw, Richard Myers, Steven Platt, Kirstin Edwards, Jonathan Hubb, Joanna Ellis,  
Maria Zambon

EPI\_ISL\_423269 hCoV-19/England/20138007104/2020 Europe / United Kingdom / England 2020-03-27  
Respiratory Virus Unit, Microbiology Services Colindale, Public Health England Respiratory Virus Unit,  
Microbiology Services Colindale, Public Health England Monica Galiano, Shahjahan Miah, Angie Lackenby, Omolola  
Akinbami, Tiina Talts, Leena Bhaw, Richard Myers, Steven Platt, Kirstin Edwards, Jonathan Hubb, Joanna Ellis,  
Maria Zambon

EPI\_ISL\_423288 hCoV-19/England/20138017804/2020 Europe / United Kingdom / England 2020-03-26  
Respiratory Virus Unit, Microbiology Services Colindale, Public Health England Respiratory Virus Unit,  
Microbiology Services Colindale, Public Health England Monica Galiano, Shahjahan Miah, Angie Lackenby, Omolola  
Akinbami, Tiina Talts, Leena Bhaw, Richard Myers, Steven Platt, Kirstin Edwards, Jonathan Hubb, Joanna Ellis,  
Maria Zambon

EPI\_ISL\_424400 hCoV-19/Iceland/376/2020 Europe / Iceland / Reykjavik 2020-03-19 The National  
University Hospital of Iceland deCODE genetics Daniel F Gudbjartsson; Agnar Helgason; Hakon Jonsson; Olafur T  
Magnusson; Pall Melsted; Gudmundur L Norddahl; Jona Saemundsdottir; Asgeir Sigurdsson; Patrick Sulem; Arna B  
Agustsdottir; Berglind Eiriksdottir; Run Fridriksdottir; Elisabet E Gardarsdottir; Gudmundur Georgsson; Olafia  
S Gretarsdottir; Kjartan R Gudmundsson; Thora R Gunnarsdottir; Arnaldur Gylfason; Hilma Holm; Brynjar O  
Jensson; Aslaug Jonasdottir; Kamilla S Josefsdottir; Thordur Kristjansson; Droplaug N Magnusdottir; Louise le  
Roux; Gudrun Sigmundsdottir; Gardar Sveinbjornsson; Kristin E Sveinsdottir; Maney Sveinsdottir; Emil A  
Thorarensen; Bjarni Thorbjornsson; Gisli Masson; Ingileif Jonsdottir; Alma Moller; Thorolfur Gudnason; Karl G  
Kristinsson; Unnur Thorsteinsdottir; Kari Stefansson

EPI\_ISL\_424401 hCoV-19/Iceland/377/2020 Europe / Iceland / Reykjavik 2020-03-19 The National  
University Hospital of Iceland deCODE genetics Daniel F Gudbjartsson; Agnar Helgason; Hakon Jonsson; Olafur T  
Magnusson; Pall Melsted; Gudmundur L Norddahl; Jona Saemundsdottir; Asgeir Sigurdsson; Patrick Sulem; Arna B  
Agustsdottir; Berglind Eiriksdottir; Run Fridriksdottir; Elisabet E Gardarsdottir; Gudmundur Georgsson; Olafia  
S Gretarsdottir; Kjartan R Gudmundsson; Thora R Gunnarsdottir; Arnaldur Gylfason; Hilma Holm; Brynjar O  
Jensson; Aslaug Jonasdottir; Kamilla S Josefsdottir; Thordur Kristjansson; Droplaug N Magnusdottir; Louise le  
Roux; Gudrun Sigmundsdottir; Gardar Sveinbjornsson; Kristin E Sveinsdottir; Maney Sveinsdottir; Emil A  
Thorarensen; Bjarni Thorbjornsson; Gisli Masson; Ingileif Jonsdottir; Alma Moller; Thorolfur Gudnason; Karl G  
Kristinsson; Unnur Thorsteinsdottir; Kari Stefansson

EPI\_ISL\_424402 hCoV-19/Iceland/378/2020 Europe / Iceland / Reykjavik 2020-03-19 The National  
University Hospital of Iceland deCODE genetics Daniel F Gudbjartsson; Agnar Helgason; Hakon Jonsson; Olafur T  
Magnusson; Pall Melsted; Gudmundur L Norddahl; Jona Saemundsdottir; Asgeir Sigurdsson; Patrick Sulem; Arna B  
Agustsdottir; Berglind Eiriksdottir; Run Fridriksdottir; Elisabet E Gardarsdottir; Gudmundur Georgsson; Olafia  
S Gretarsdottir; Kjartan R Gudmundsson; Thora R Gunnarsdottir; Arnaldur Gylfason; Hilma Holm; Brynjar O  
Jensson; Aslaug Jonasdottir; Kamilla S Josefsdottir; Thordur Kristjansson; Droplaug N Magnusdottir; Louise le  
Roux; Gudrun Sigmundsdottir; Gardar Sveinbjornsson; Kristin E Sveinsdottir; Maney Sveinsdottir; Emil A  
Thorarensen; Bjarni Thorbjornsson; Gisli Masson; Ingileif Jonsdottir; Alma Moller; Thorolfur Gudnason; Karl G  
Kristinsson; Unnur Thorsteinsdottir; Kari Stefansson

EPI\_ISL\_424403 hCoV-19/Iceland/379/2020 Europe / Iceland / Reykjavik 2020-03-18 The National  
University Hospital of Iceland deCODE genetics Daniel F Gudbjartsson; Agnar Helgason; Hakon Jonsson; Olafur T  
Magnusson; Pall Melsted; Gudmundur L Norddahl; Jona Saemundsdottir; Asgeir Sigurdsson; Patrick Sulem; Arna B  
Agustsdottir; Berglind Eiriksdottir; Run Fridriksdottir; Elisabet E Gardarsdottir; Gudmundur Georgsson; Olafia  
S Gretarsdottir; Kjartan R Gudmundsson; Thora R Gunnarsdottir; Arnaldur Gylfason; Hilma Holm; Brynjar O  
Jensson; Aslaug Jonasdottir; Kamilla S Josefsdottir; Thordur Kristjansson; Droplaug N Magnusdottir; Louise le  
Roux; Gudrun Sigmundsdottir; Gardar Sveinbjornsson; Kristin E Sveinsdottir; Maney Sveinsdottir; Emil A  
Thorarensen; Bjarni Thorbjornsson; Gisli Masson; Ingileif Jonsdottir; Alma Moller; Thorolfur Gudnason; Karl G  
Kristinsson; Unnur Thorsteinsdottir; Kari Stefansson

EPI\_ISL\_424404 hCoV-19/Iceland/380/2020 Europe / Iceland / Reykjavik 2020-03-19 The National  
University Hospital of Iceland deCODE genetics Daniel F Gudbjartsson; Agnar Helgason; Hakon Jonsson; Olafur T  
Magnusson; Pall Melsted; Gudmundur L Norddahl; Jona Saemundsdottir; Asgeir Sigurdsson; Patrick Sulem; Arna B  
Agustsdottir; Berglind Eiriksdottir; Run Fridriksdottir; Elisabet E Gardarsdottir; Gudmundur Georgsson; Olafia  
S Gretarsdottir; Kjartan R Gudmundsson; Thora R Gunnarsdottir; Arnaldur Gylfason; Hilma Holm; Brynjar O  
Jensson; Aslaug Jonasdottir; Kamilla S Josefsdottir; Thordur Kristjansson; Droplaug N Magnusdottir; Louise le  
Roux; Gudrun Sigmundsdottir; Gardar Sveinbjornsson; Kristin E Sveinsdottir; Maney Sveinsdottir; Emil A  
Thorarensen; Bjarni Thorbjornsson; Gisli Masson; Ingileif Jonsdottir; Alma Moller; Thorolfur Gudnason; Karl G  
Kristinsson; Unnur Thorsteinsdottir; Kari Stefansson

EPI\_ISL\_424405 hCoV-19/Iceland/381/2020 Europe / Iceland / Reykjavik 2020-03-19 The National  
University Hospital of Iceland deCODE genetics Daniel F Gudbjartsson; Agnar Helgason; Hakon Jonsson; Olafur T  
Magnusson; Pall Melsted; Gudmundur L Norddahl; Jona Saemundsdottir; Asgeir Sigurdsson; Patrick Sulem; Arna B  
Agustsdottir; Berglind Eiriksdottir; Run Fridriksdottir; Elisabet E Gardarsdottir; Gudmundur Georgsson; Olafia  
S Gretarsdottir; Kjartan R Gudmundsson; Thora R Gunnarsdottir; Arnaldur Gylfason; Hilma Holm; Brynjar O





























Roux; Gudrun Sigmundsdottir; Gardar Sveinbjornsson; Kristin E Sveinsdottir; Maney Sveinsdottir; Emil A Thorarensen; Bjarni Thorbjornsson; Gisli Masson; Ingileif Jonsdottir; Alma Moller; Thorolfur Gudnason; Karl G Kristinsson; Unnur Thorsteinsdottir; Kari Stefansson

EPI\_ISL\_424612 hCoV-19/Iceland/592/2020 Europe / Iceland / Reykjavik 2020-03-27 The National University Hospital of Iceland deCODE genetics Daniel F Gudbjartsson; Agnar Helgason; Hakon Jonsson; Olafur T Magnusson; Pall Melsted; Gudmundur L Norddahl; Jona Saemundsdottir; Asgeir Sigurdsson; Patrick Sulem; Arna B Agustsdottir; Berglind Eiriksdoottir; Run Fridriksdottir; Elisabet E Gardarsdottir; Gudmundur Georgsson; Olafia S Gretarsdottir; Kjartan R Gudmundsson; Thora R Gunnarsdottir; Arnaldur Gylfason; Hilma Holm; Brynjar O Jenson; Aslaug Jonasdottir; Kamilla S Josefsdottir; Thordur Kristjansson; Droplaug N Magnusdottir; Louise le Roux; Gudrun Sigmundsdottir; Gardar Sveinbjornsson; Kristin E Sveinsdottir; Maney Sveinsdottir; Emil A Thorarensen; Bjarni Thorbjornsson; Gisli Masson; Ingileif Jonsdottir; Alma Moller; Thorolfur Gudnason; Karl G Kristinsson; Unnur Thorsteinsdottir; Kari Stefansson

EPI\_ISL\_425702 hCoV-19/Scotland/CVR163/2020 Europe / United Kingdom / Scotland 2020-03-17 West of Scotland Specialist Virology Centre, NHSGGC / MRC-University of Glasgow Centre for Virus Research COVID-19 Genomics UK (COG-UK) Consortium Ana da Silva Filipe, Kathy Smollett, Stephen Carmichael, Natasha Johnson, Daniel Mair, Lily Tong, Jenna Nichols; Sarah McDonald; Richard Orton, Joseph Hughes, Sreenu Vattipally, David L Robertson; Kathy Li, Natasha Jesudason, Rajiv Shah, James Shepherd, Antonia Ho, Emma Thomson; Alasdair MacLean, Rory Gunson.

EPI\_ISL\_425703 hCoV-19/Scotland/CVR164/2020 Europe / United Kingdom / Scotland 2020-03-17 West of Scotland Specialist Virology Centre, NHSGGC / MRC-University of Glasgow Centre for Virus Research COVID-19 Genomics UK (COG-UK) Consortium Ana da Silva Filipe, Kathy Smollett, Stephen Carmichael, Natasha Johnson, Daniel Mair, Lily Tong, Jenna Nichols; Sarah McDonald; Richard Orton, Joseph Hughes, Sreenu Vattipally, David L Robertson; Kathy Li, Natasha Jesudason, Rajiv Shah, James Shepherd, Antonia Ho, Emma Thomson; Alasdair MacLean, Rory Gunson.

EPI\_ISL\_425704 hCoV-19/Scotland/CVR165/2020 Europe / United Kingdom / Scotland 2020-03-17 West of Scotland Specialist Virology Centre, NHSGGC / MRC-University of Glasgow Centre for Virus Research COVID-19 Genomics UK (COG-UK) Consortium Ana da Silva Filipe, Kathy Smollett, Stephen Carmichael, Natasha Johnson, Daniel Mair, Lily Tong, Jenna Nichols; Sarah McDonald; Richard Orton, Joseph Hughes, Sreenu Vattipally, David L Robertson; Kathy Li, Natasha Jesudason, Rajiv Shah, James Shepherd, Antonia Ho, Emma Thomson; Alasdair MacLean, Rory Gunson.

EPI\_ISL\_425705 hCoV-19/Scotland/CVR166/2020 Europe / United Kingdom / Scotland 2020-03-17 West of Scotland Specialist Virology Centre, NHSGGC / MRC-University of Glasgow Centre for Virus Research COVID-19 Genomics UK (COG-UK) Consortium Ana da Silva Filipe, Kathy Smollett, Stephen Carmichael, Natasha Johnson, Daniel Mair, Lily Tong, Jenna Nichols; Sarah McDonald; Richard Orton, Joseph Hughes, Sreenu Vattipally, David L Robertson; Kathy Li, Natasha Jesudason, Rajiv Shah, James Shepherd, Antonia Ho, Emma Thomson; Alasdair MacLean, Rory Gunson.

EPI\_ISL\_425707 hCoV-19/Scotland/CVR168/2020 Europe / United Kingdom / Scotland 2020-03-17 West of Scotland Specialist Virology Centre, NHSGGC / MRC-University of Glasgow Centre for Virus Research COVID-19 Genomics UK (COG-UK) Consortium Ana da Silva Filipe, Kathy Smollett, Stephen Carmichael, Natasha Johnson, Daniel Mair, Lily Tong, Jenna Nichols; Sarah McDonald; Richard Orton, Joseph Hughes, Sreenu Vattipally, David L Robertson; Kathy Li, Natasha Jesudason, Rajiv Shah, James Shepherd, Antonia Ho, Emma Thomson; Alasdair MacLean, Rory Gunson.

EPI\_ISL\_425708 hCoV-19/Scotland/CVR169/2020 Europe / United Kingdom / Scotland 2020-03-17 West of Scotland Specialist Virology Centre, NHSGGC / MRC-University of Glasgow Centre for Virus Research COVID-19 Genomics UK (COG-UK) Consortium Ana da Silva Filipe, Kathy Smollett, Stephen Carmichael, Natasha Johnson, Daniel Mair, Lily Tong, Jenna Nichols; Sarah McDonald; Richard Orton, Joseph Hughes, Sreenu Vattipally, David L Robertson; Kathy Li, Natasha Jesudason, Rajiv Shah, James Shepherd, Antonia Ho, Emma Thomson; Alasdair MacLean, Rory Gunson.

EPI\_ISL\_425709 hCoV-19/Scotland/CVR17/2020 Europe / United Kingdom / Scotland 2020-03-09 West of Scotland Specialist Virology Centre, NHSGGC / MRC-University of Glasgow Centre for Virus Research COVID-19 Genomics UK (COG-UK) Consortium Ana da Silva Filipe, Kathy Smollett, Stephen Carmichael, Natasha Johnson, Daniel Mair, Lily Tong, Jenna Nichols; Sarah McDonald; Richard Orton, Joseph Hughes, Sreenu Vattipally, David L Robertson; Kathy Li, Natasha Jesudason, Rajiv Shah, James Shepherd, Antonia Ho, Emma Thomson; Alasdair MacLean, Rory Gunson.

EPI\_ISL\_425711 hCoV-19/Scotland/CVR171/2020 Europe / United Kingdom / Scotland 2020-03-17 West of Scotland Specialist Virology Centre, NHSGGC / MRC-University of Glasgow Centre for Virus Research COVID-19 Genomics UK (COG-UK) Consortium Ana da Silva Filipe, Kathy Smollett, Stephen Carmichael, Natasha Johnson, Daniel Mair, Lily Tong, Jenna Nichols; Sarah McDonald; Richard Orton, Joseph Hughes, Sreenu Vattipally, David L Robertson; Kathy Li, Natasha Jesudason, Rajiv Shah, James Shepherd, Antonia Ho, Emma Thomson; Alasdair MacLean, Rory Gunson.

EPI\_ISL\_425713 hCoV-19/Scotland/CVR173/2020 Europe / United Kingdom / Scotland 2020-03-17 West of Scotland Specialist Virology Centre, NHSGGC / MRC-University of Glasgow Centre for Virus Research COVID-19 Genomics UK (COG-UK) Consortium Ana da Silva Filipe, Kathy Smollett, Stephen Carmichael, Natasha Johnson, Daniel Mair, Lily Tong, Jenna Nichols; Sarah McDonald; Richard Orton, Joseph Hughes, Sreenu Vattipally, David L Robertson; Kathy Li, Natasha Jesudason, Rajiv Shah, James Shepherd, Antonia Ho, Emma Thomson; Alasdair MacLean, Rory Gunson.

EPI\_ISL\_425715 hCoV-19/Scotland/CVR175/2020 Europe / United Kingdom / Scotland 2020-03-17 West of Scotland Specialist Virology Centre, NHSGGC / MRC-University of Glasgow Centre for Virus Research COVID-19 Genomics UK (COG-UK) Consortium Ana da Silva Filipe, Kathy Smollett, Stephen Carmichael, Natasha Johnson, Daniel Mair, Lily Tong, Jenna Nichols; Sarah McDonald; Richard Orton, Joseph Hughes, Sreenu























EPI\_ISL\_425919 hCoV-19/Scotland/EDB151/2020 Europe / United Kingdom / Scotland 2020-03-24  
Virology Department, Royal Infirmary of Edinburgh, NHS Lothian / School of Biological Sciences, University of  
Edinburgh / Institute of Genetics and Molecular Medicine, University of Edinburgh COVID-19 Genomics UK  
(COG-UK) Consortium McHugh M, Dewar R, Rooke S, Gallagher M, Balcaza C, O'Toole A, Hill V, McCrone JT,  
Colquhoun R, Yu X, Jackson B, Scher E, Rambaut A, Williams TC, Templeton K

EPI\_ISL\_425921 hCoV-19/Scotland/EDB156/2020 Europe / United Kingdom / Scotland 2020-03-23  
Virology Department, Royal Infirmary of Edinburgh, NHS Lothian / School of Biological Sciences, University of  
Edinburgh / Institute of Genetics and Molecular Medicine, University of Edinburgh COVID-19 Genomics UK  
(COG-UK) Consortium McHugh M, Dewar R, Rooke S, Gallagher M, Balcaza C, O'Toole A, Hill V, McCrone JT,  
Colquhoun R, Yu X, Jackson B, Scher E, Rambaut A, Williams TC, Templeton K

EPI\_ISL\_425922 hCoV-19/Scotland/EDB157/2020 Europe / United Kingdom / Scotland 2020-03-23  
Virology Department, Royal Infirmary of Edinburgh, NHS Lothian / School of Biological Sciences, University of  
Edinburgh / Institute of Genetics and Molecular Medicine, University of Edinburgh COVID-19 Genomics UK  
(COG-UK) Consortium McHugh M, Dewar R, Rooke S, Gallagher M, Balcaza C, O'Toole A, Hill V, McCrone JT,  
Colquhoun R, Yu X, Jackson B, Scher E, Rambaut A, Williams TC, Templeton K

EPI\_ISL\_425924 hCoV-19/Scotland/EDB162/2020 Europe / United Kingdom / Scotland 2020-03-24  
Virology Department, Royal Infirmary of Edinburgh, NHS Lothian / School of Biological Sciences, University of  
Edinburgh / Institute of Genetics and Molecular Medicine, University of Edinburgh COVID-19 Genomics UK  
(COG-UK) Consortium McHugh M, Dewar R, Rooke S, Gallagher M, Balcaza C, O'Toole A, Hill V, McCrone JT,  
Colquhoun R, Yu X, Jackson B, Scher E, Rambaut A, Williams TC, Templeton K

EPI\_ISL\_425925 hCoV-19/Scotland/EDB168/2020 Europe / United Kingdom / Scotland 2020-03-24  
Virology Department, Royal Infirmary of Edinburgh, NHS Lothian / School of Biological Sciences, University of  
Edinburgh / Institute of Genetics and Molecular Medicine, University of Edinburgh COVID-19 Genomics UK  
(COG-UK) Consortium McHugh M, Dewar R, Rooke S, Gallagher M, Balcaza C, O'Toole A, Hill V, McCrone JT,  
Colquhoun R, Yu X, Jackson B, Scher E, Rambaut A, Williams TC, Templeton K

EPI\_ISL\_425927 hCoV-19/Scotland/EDB181/2020 Europe / United Kingdom / Scotland 2020-03-24  
Virology Department, Royal Infirmary of Edinburgh, NHS Lothian / School of Biological Sciences, University of  
Edinburgh / Institute of Genetics and Molecular Medicine, University of Edinburgh COVID-19 Genomics UK  
(COG-UK) Consortium McHugh M, Dewar R, Rooke S, Gallagher M, Balcaza C, O'Toole A, Hill V, McCrone JT,  
Colquhoun R, Yu X, Jackson B, Scher E, Rambaut A, Williams TC, Templeton K

EPI\_ISL\_425933 hCoV-19/Scotland/EDB189/2020 Europe / United Kingdom / Scotland 2020-03-25  
Virology Department, Royal Infirmary of Edinburgh, NHS Lothian / School of Biological Sciences, University of  
Edinburgh / Institute of Genetics and Molecular Medicine, University of Edinburgh COVID-19 Genomics UK  
(COG-UK) Consortium McHugh M, Dewar R, Rooke S, Gallagher M, Balcaza C, O'Toole A, Hill V, McCrone JT,  
Colquhoun R, Yu X, Jackson B, Scher E, Rambaut A, Williams TC, Templeton K

EPI\_ISL\_425937 hCoV-19/Scotland/EDB194/2020 Europe / United Kingdom / Scotland 2020-03-25  
Virology Department, Royal Infirmary of Edinburgh, NHS Lothian / School of Biological Sciences, University of  
Edinburgh / Institute of Genetics and Molecular Medicine, University of Edinburgh COVID-19 Genomics UK  
(COG-UK) Consortium McHugh M, Dewar R, Rooke S, Gallagher M, Balcaza C, O'Toole A, Hill V, McCrone JT,  
Colquhoun R, Yu X, Jackson B, Scher E, Rambaut A, Williams TC, Templeton K

EPI\_ISL\_425939 hCoV-19/Scotland/EDB198/2020 Europe / United Kingdom / Scotland 2020-03-25  
Virology Department, Royal Infirmary of Edinburgh, NHS Lothian / School of Biological Sciences, University of  
Edinburgh / Institute of Genetics and Molecular Medicine, University of Edinburgh COVID-19 Genomics UK  
(COG-UK) Consortium McHugh M, Dewar R, Rooke S, Gallagher M, Balcaza C, O'Toole A, Hill V, McCrone JT,  
Colquhoun R, Yu X, Jackson B, Scher E, Rambaut A, Williams TC, Templeton K

EPI\_ISL\_425942 hCoV-19/Scotland/EDB204/2020 Europe / United Kingdom / Scotland 2020-03-26  
Virology Department, Royal Infirmary of Edinburgh, NHS Lothian / School of Biological Sciences, University of  
Edinburgh / Institute of Genetics and Molecular Medicine, University of Edinburgh COVID-19 Genomics UK  
(COG-UK) Consortium McHugh M, Dewar R, Rooke S, Gallagher M, Balcaza C, O'Toole A, Hill V, McCrone JT,  
Colquhoun R, Yu X, Jackson B, Scher E, Rambaut A, Williams TC, Templeton K

EPI\_ISL\_425943 hCoV-19/Scotland/EDB212/2020 Europe / United Kingdom / Scotland 2020-03-26  
Virology Department, Royal Infirmary of Edinburgh, NHS Lothian / School of Biological Sciences, University of  
Edinburgh / Institute of Genetics and Molecular Medicine, University of Edinburgh COVID-19 Genomics UK  
(COG-UK) Consortium McHugh M, Dewar R, Rooke S, Gallagher M, Balcaza C, O'Toole A, Hill V, McCrone JT,  
Colquhoun R, Yu X, Jackson B, Scher E, Rambaut A, Williams TC, Templeton K

EPI\_ISL\_428148 hCoV-19/Sweden/RV-FOI-4/2020 Europe / Sweden / Västerbotten 2020-03-18 Klinisk  
mikrobiologi, Region Västerbotten Unit for Biological Agents, Department for CBRN Defence and Security,  
Swedish Defence Research Agency FOI bioinformatics team

EPI\_ISL\_429300 hCoV-19/Denmark/ALAB-HH46/2020 Europe / Denmark / Unknown 2020-03-13 Department of  
Clinical Microbiology, Copenhagen University Hospital, Hvidovre, Kettegaard Alle 30, 2650 Hvidovre.  
Albertsen lab, Department of Chemistry and Bioscience, Aalborg University, Denmark Rasmus Kirkegaard

EPI\_ISL\_429301 hCoV-19/Denmark/ALAB-HH49/2020 Europe / Denmark / Unknown 2020-03-16 Department of  
Clinical Microbiology, Copenhagen University Hospital, Hvidovre, Kettegaard Alle 30, 2650 Hvidovre.  
Albertsen lab, Department of Chemistry and Bioscience, Aalborg University, Denmark Rasmus Kirkegaard

EPI\_ISL\_429302 hCoV-19/Denmark/ALAB-HH50/2020 Europe / Denmark / Unknown 2020-03-16 Department of  
Clinical Microbiology, Copenhagen University Hospital, Hvidovre, Kettegaard Alle 30, 2650 Hvidovre.  
Albertsen lab, Department of Chemistry and Bioscience, Aalborg University, Denmark Rasmus Kirkegaard

EPI\_ISL\_429303 hCoV-19/Denmark/ALAB-HH51/2020 Europe / Denmark / Unknown 2020-03-16 Department of  
Clinical Microbiology, Copenhagen University Hospital, Hvidovre, Kettegaard Alle 30, 2650 Hvidovre.  
Albertsen lab, Department of Chemistry and Bioscience, Aalborg University, Denmark Rasmus Kirkegaard











|                                                                                                                                                                                                                                                                                                                                                                                                                                                                                                                                                                                                                                                                                                                                             |                                   |                                                     |                |
|---------------------------------------------------------------------------------------------------------------------------------------------------------------------------------------------------------------------------------------------------------------------------------------------------------------------------------------------------------------------------------------------------------------------------------------------------------------------------------------------------------------------------------------------------------------------------------------------------------------------------------------------------------------------------------------------------------------------------------------------|-----------------------------------|-----------------------------------------------------|----------------|
| EPI_ISL_429483                                                                                                                                                                                                                                                                                                                                                                                                                                                                                                                                                                                                                                                                                                                              | hCoV-19/Denmark/ALAB-SSI383/2020  | Europe / Denmark / Unknown                          | 2020-03-24     |
| Department of Virus and Microbiological Special Diagnostics, Statens Serum Institut, Copenhagen, Denmark, Artillerivej 5, 2300 Copenhagen S Albertsen lab, Department of Chemistry and Bioscience, Aalborg University, Denmark Rasmus Kirkegaard                                                                                                                                                                                                                                                                                                                                                                                                                                                                                            |                                   |                                                     |                |
| EPI_ISL_429484                                                                                                                                                                                                                                                                                                                                                                                                                                                                                                                                                                                                                                                                                                                              | hCoV-19/Denmark/ALAB-SSI384/2020  | Europe / Denmark / Unknown                          | 2020-03-24     |
| Department of Virus and Microbiological Special Diagnostics, Statens Serum Institut, Copenhagen, Denmark, Artillerivej 5, 2300 Copenhagen S Albertsen lab, Department of Chemistry and Bioscience, Aalborg University, Denmark Rasmus Kirkegaard                                                                                                                                                                                                                                                                                                                                                                                                                                                                                            |                                   |                                                     |                |
| EPI_ISL_429485                                                                                                                                                                                                                                                                                                                                                                                                                                                                                                                                                                                                                                                                                                                              | hCoV-19/Denmark/ALAB-SSI385/2020  | Europe / Denmark / Unknown                          | 2020-03-24     |
| Department of Virus and Microbiological Special Diagnostics, Statens Serum Institut, Copenhagen, Denmark, Artillerivej 5, 2300 Copenhagen S Albertsen lab, Department of Chemistry and Bioscience, Aalborg University, Denmark Rasmus Kirkegaard                                                                                                                                                                                                                                                                                                                                                                                                                                                                                            |                                   |                                                     |                |
| EPI_ISL_429486                                                                                                                                                                                                                                                                                                                                                                                                                                                                                                                                                                                                                                                                                                                              | hCoV-19/Denmark/ALAB-SSI390/2020  | Europe / Denmark / Unknown                          | 2020-03-24     |
| Department of Virus and Microbiological Special Diagnostics, Statens Serum Institut, Copenhagen, Denmark, Artillerivej 5, 2300 Copenhagen S Albertsen lab, Department of Chemistry and Bioscience, Aalborg University, Denmark Rasmus Kirkegaard                                                                                                                                                                                                                                                                                                                                                                                                                                                                                            |                                   |                                                     |                |
| EPI_ISL_429488                                                                                                                                                                                                                                                                                                                                                                                                                                                                                                                                                                                                                                                                                                                              | hCoV-19/Denmark/ALAB-SSI393/2020  | Europe / Denmark / Unknown                          | 2020-03-24     |
| Department of Virus and Microbiological Special Diagnostics, Statens Serum Institut, Copenhagen, Denmark, Artillerivej 5, 2300 Copenhagen S Albertsen lab, Department of Chemistry and Bioscience, Aalborg University, Denmark Rasmus Kirkegaard                                                                                                                                                                                                                                                                                                                                                                                                                                                                                            |                                   |                                                     |                |
| EPI_ISL_429489                                                                                                                                                                                                                                                                                                                                                                                                                                                                                                                                                                                                                                                                                                                              | hCoV-19/Denmark/ALAB-SSI394/2020  | Europe / Denmark / Unknown                          | 2020-03-24     |
| Department of Virus and Microbiological Special Diagnostics, Statens Serum Institut, Copenhagen, Denmark, Artillerivej 5, 2300 Copenhagen S Albertsen lab, Department of Chemistry and Bioscience, Aalborg University, Denmark Rasmus Kirkegaard                                                                                                                                                                                                                                                                                                                                                                                                                                                                                            |                                   |                                                     |                |
| EPI_ISL_429490                                                                                                                                                                                                                                                                                                                                                                                                                                                                                                                                                                                                                                                                                                                              | hCoV-19/Denmark/ALAB-SSI395/2020  | Europe / Denmark / Unknown                          | 2020-03-23     |
| Department of Virus and Microbiological Special Diagnostics, Statens Serum Institut, Copenhagen, Denmark, Artillerivej 5, 2300 Copenhagen S Albertsen lab, Department of Chemistry and Bioscience, Aalborg University, Denmark Rasmus Kirkegaard                                                                                                                                                                                                                                                                                                                                                                                                                                                                                            |                                   |                                                     |                |
| EPI_ISL_429492                                                                                                                                                                                                                                                                                                                                                                                                                                                                                                                                                                                                                                                                                                                              | hCoV-19/Denmark/ALAB-SSI399/2020  | Europe / Denmark / Unknown                          | 2020-03-23     |
| Department of Virus and Microbiological Special Diagnostics, Statens Serum Institut, Copenhagen, Denmark, Artillerivej 5, 2300 Copenhagen S Albertsen lab, Department of Chemistry and Bioscience, Aalborg University, Denmark Rasmus Kirkegaard                                                                                                                                                                                                                                                                                                                                                                                                                                                                                            |                                   |                                                     |                |
| EPI_ISL_429493                                                                                                                                                                                                                                                                                                                                                                                                                                                                                                                                                                                                                                                                                                                              | hCoV-19/Denmark/ALAB-SSI400/2020  | Europe / Denmark / Unknown                          | 2020-03-23     |
| Department of Virus and Microbiological Special Diagnostics, Statens Serum Institut, Copenhagen, Denmark, Artillerivej 5, 2300 Copenhagen S Albertsen lab, Department of Chemistry and Bioscience, Aalborg University, Denmark Rasmus Kirkegaard                                                                                                                                                                                                                                                                                                                                                                                                                                                                                            |                                   |                                                     |                |
| EPI_ISL_429495                                                                                                                                                                                                                                                                                                                                                                                                                                                                                                                                                                                                                                                                                                                              | hCoV-19/Denmark/ALAB-SSI402/2020  | Europe / Denmark / Unknown                          | 2020-03-09     |
| Department of Virus and Microbiological Special Diagnostics, Statens Serum Institut, Copenhagen, Denmark, Artillerivej 5, 2300 Copenhagen S Albertsen lab, Department of Chemistry and Bioscience, Aalborg University, Denmark Rasmus Kirkegaard                                                                                                                                                                                                                                                                                                                                                                                                                                                                                            |                                   |                                                     |                |
| EPI_ISL_429496                                                                                                                                                                                                                                                                                                                                                                                                                                                                                                                                                                                                                                                                                                                              | hCoV-19/Denmark/ALAB-SSI403A/2020 | Europe / Denmark / Unknown                          | 2020-03-23     |
| Department of Virus and Microbiological Special Diagnostics, Statens Serum Institut, Copenhagen, Denmark, Artillerivej 5, 2300 Copenhagen S Albertsen lab, Department of Chemistry and Bioscience, Aalborg University, Denmark Rasmus Kirkegaard                                                                                                                                                                                                                                                                                                                                                                                                                                                                                            |                                   |                                                     |                |
| EPI_ISL_429497                                                                                                                                                                                                                                                                                                                                                                                                                                                                                                                                                                                                                                                                                                                              | hCoV-19/Denmark/ALAB-SSI404/2020  | Europe / Denmark / Unknown                          | 2020-03-08     |
| Department of Virus and Microbiological Special Diagnostics, Statens Serum Institut, Copenhagen, Denmark, Artillerivej 5, 2300 Copenhagen S Albertsen lab, Department of Chemistry and Bioscience, Aalborg University, Denmark Rasmus Kirkegaard                                                                                                                                                                                                                                                                                                                                                                                                                                                                                            |                                   |                                                     |                |
| EPI_ISL_429499                                                                                                                                                                                                                                                                                                                                                                                                                                                                                                                                                                                                                                                                                                                              | hCoV-19/Denmark/ALAB-SSI405/2020  | Europe / Denmark / Unknown                          | 2020-03-08     |
| Department of Virus and Microbiological Special Diagnostics, Statens Serum Institut, Copenhagen, Denmark, Artillerivej 5, 2300 Copenhagen S Albertsen lab, Department of Chemistry and Bioscience, Aalborg University, Denmark Rasmus Kirkegaard                                                                                                                                                                                                                                                                                                                                                                                                                                                                                            |                                   |                                                     |                |
| EPI_ISL_430323                                                                                                                                                                                                                                                                                                                                                                                                                                                                                                                                                                                                                                                                                                                              | hCoV-19/USA/NY-NYUMC296/2020      | North America / USA / New York / Queens             | 2020-04-10 NYU |
| Langone Health Departments of Pathology and Medicine, New York University School of Medicine Maria Aguerro-Rosenfeld, Brendan Belovarac, Margaret Black, Ludovic Boytard, John Cadley, Paolo Cotzia, John Chen, Dacia Dimartino, Xiaojun Feng, Tatyana Gindin, Emily Guzman, Adriana Heguy, Megan Hogan, Emily Huang, George Jour, Lawrence H. Lin, Raven Luther, Andrew Lytle, Christian Marier, Matthew T. Maurano, Mark J. Mulligan, Peter Meyn, Raquel Ordonez Ciriza, Iman Osman, Jared Pinnell, Vanessa Raabe, Sitharam Ramaswami, Amy Rapkiewicz, Andre M. Ribeiro-dos-Santos, Marie Samanovic-Golden, Antonio Serrano, Guomiao Shen, Matija Snuderl, Theodore Vougiouklakis, Nick Vulpescu, Gael Westby, Paul Zappile, Yutong Zhang |                                   |                                                     |                |
| EPI_ISL_430324                                                                                                                                                                                                                                                                                                                                                                                                                                                                                                                                                                                                                                                                                                                              | hCoV-19/USA/NY-NYUMC297/2020      | North America / USA / New York / Westchester County | 2020-04-10 NYU |
| Langone Health Departments of Pathology and Medicine, New York University School of Medicine Maria Aguerro-Rosenfeld, Brendan Belovarac, Margaret Black, Ludovic Boytard, John Cadley, Paolo Cotzia, John Chen, Dacia Dimartino, Xiaojun Feng, Tatyana Gindin, Emily Guzman, Adriana Heguy, Megan Hogan, Emily Huang, George Jour, Lawrence H. Lin, Raven Luther, Andrew Lytle, Christian Marier, Matthew T. Maurano, Mark J. Mulligan, Peter Meyn, Raquel Ordonez Ciriza, Iman Osman, Jared Pinnell, Vanessa Raabe, Sitharam Ramaswami, Amy Rapkiewicz, Andre M. Ribeiro-dos-Santos, Marie Samanovic-Golden, Antonio Serrano, Guomiao Shen, Matija Snuderl, Theodore Vougiouklakis, Nick Vulpescu, Gael Westby, Paul Zappile, Yutong Zhang |                                   |                                                     |                |
| EPI_ISL_430325                                                                                                                                                                                                                                                                                                                                                                                                                                                                                                                                                                                                                                                                                                                              | hCoV-19/USA/NY-NYUMC298/2020      | North America / USA / New York / Brooklyn           | 2020-04-08     |



NYU Langone Health Departments of Pathology and Medicine, New York University School of Medicine Maria  
Aguero-Rosenfeld, Brendan Belovarac, Margaret Black, Ludovic Boytard, John Cadley, Paolo Cotzia, John Chen,  
Dacia Dimartino, Xiaojun Feng, Tatyana Gindin, Emily Guzman, Adriana Heguy, Megan Hogan, Emily Huang, George  
Jour, Lawrence H. Lin, Raven Luther, Andrew Lytle, Christian Marier, Matthew T. Maurano, Mark J. Mulligan,  
Peter Meyn, Raquel Ordonez Ciriza, Iman Osman, Jared Pinnell, Vanessa Raabe, Sitharam Ramaswami, Amy  
Rapkiewicz, Andre M. Ribeiro-dos-Santos, Marie Samanovic-Golden, Antonio Serrano, Guomiao Shen, Matija Snuderl,  
Theodore Vougiouklakis, Nick Vulpescu, Gael Westby, Paul Zappile, Yutong Zhang  
EPI\_ISL\_430326 hCoV-19/USA/NY-NYUMC299/2020 North America / USA / New York / Brooklyn 2020-03-30  
NYU Langone Health Departments of Pathology and Medicine, New York University School of Medicine Maria  
Aguero-Rosenfeld, Brendan Belovarac, Margaret Black, Ludovic Boytard, John Cadley, Paolo Cotzia, John Chen,  
Dacia Dimartino, Xiaojun Feng, Tatyana Gindin, Emily Guzman, Adriana Heguy, Megan Hogan, Emily Huang, George  
Jour, Lawrence H. Lin, Raven Luther, Andrew Lytle, Christian Marier, Matthew T. Maurano, Mark J. Mulligan,  
Peter Meyn, Raquel Ordonez Ciriza, Iman Osman, Jared Pinnell, Vanessa Raabe, Sitharam Ramaswami, Amy  
Rapkiewicz, Andre M. Ribeiro-dos-Santos, Marie Samanovic-Golden, Antonio Serrano, Guomiao Shen, Matija Snuderl,  
Theodore Vougiouklakis, Nick Vulpescu, Gael Westby, Paul Zappile, Yutong Zhang  
EPI\_ISL\_430327 hCoV-19/USA/NY-NYUMC300/2020 North America / USA / New York / Manhattan 2020-03-30  
NYU Langone Health Departments of Pathology and Medicine, New York University School of Medicine Maria  
Aguero-Rosenfeld, Brendan Belovarac, Margaret Black, Ludovic Boytard, John Cadley, Paolo Cotzia, John Chen,  
Dacia Dimartino, Xiaojun Feng, Tatyana Gindin, Emily Guzman, Adriana Heguy, Megan Hogan, Emily Huang, George  
Jour, Lawrence H. Lin, Raven Luther, Andrew Lytle, Christian Marier, Matthew T. Maurano, Mark J. Mulligan,  
Peter Meyn, Raquel Ordonez Ciriza, Iman Osman, Jared Pinnell, Vanessa Raabe, Sitharam Ramaswami, Amy  
Rapkiewicz, Andre M. Ribeiro-dos-Santos, Marie Samanovic-Golden, Antonio Serrano, Guomiao Shen, Matija Snuderl,  
Theodore Vougiouklakis, Nick Vulpescu, Gael Westby, Paul Zappile, Yutong Zhang  
EPI\_ISL\_430328 hCoV-19/USA/NY-NYUMC301/2020 North America / USA / New York / Brooklyn 2020-03-30  
NYU Langone Health Departments of Pathology and Medicine, New York University School of Medicine Maria  
Aguero-Rosenfeld, Brendan Belovarac, Margaret Black, Ludovic Boytard, John Cadley, Paolo Cotzia, John Chen,  
Dacia Dimartino, Xiaojun Feng, Tatyana Gindin, Emily Guzman, Adriana Heguy, Megan Hogan, Emily Huang, George  
Jour, Lawrence H. Lin, Raven Luther, Andrew Lytle, Christian Marier, Matthew T. Maurano, Mark J. Mulligan,  
Peter Meyn, Raquel Ordonez Ciriza, Iman Osman, Jared Pinnell, Vanessa Raabe, Sitharam Ramaswami, Amy  
Rapkiewicz, Andre M. Ribeiro-dos-Santos, Marie Samanovic-Golden, Antonio Serrano, Guomiao Shen, Matija Snuderl,  
Theodore Vougiouklakis, Nick Vulpescu, Gael Westby, Paul Zappile, Yutong Zhang  
EPI\_ISL\_430329 hCoV-19/USA/NY-NYUMC302/2020 North America / USA / New York / Staten Island 2020-03-30  
NYU Langone Health Departments of Pathology and Medicine, New York University School of Medicine Maria  
Aguero-Rosenfeld, Brendan Belovarac, Margaret Black, Ludovic Boytard, John Cadley, Paolo Cotzia, John Chen,  
Dacia Dimartino, Xiaojun Feng, Tatyana Gindin, Emily Guzman, Adriana Heguy, Megan Hogan, Emily Huang, George  
Jour, Lawrence H. Lin, Raven Luther, Andrew Lytle, Christian Marier, Matthew T. Maurano, Mark J. Mulligan,  
Peter Meyn, Raquel Ordonez Ciriza, Iman Osman, Jared Pinnell, Vanessa Raabe, Sitharam Ramaswami, Amy  
Rapkiewicz, Andre M. Ribeiro-dos-Santos, Marie Samanovic-Golden, Antonio Serrano, Guomiao Shen, Matija Snuderl,  
Theodore Vougiouklakis, Nick Vulpescu, Gael Westby, Paul Zappile, Yutong Zhang  
EPI\_ISL\_430330 hCoV-19/USA/NY-NYUMC303/2020 North America / USA / New York / Nassau County 2020-03-30  
NYU Langone Health Departments of Pathology and Medicine, New York University School of Medicine Maria  
Aguero-Rosenfeld, Brendan Belovarac, Margaret Black, Ludovic Boytard, John Cadley, Paolo Cotzia, John Chen,  
Dacia Dimartino, Xiaojun Feng, Tatyana Gindin, Emily Guzman, Adriana Heguy, Megan Hogan, Emily Huang, George  
Jour, Lawrence H. Lin, Raven Luther, Andrew Lytle, Christian Marier, Matthew T. Maurano, Mark J. Mulligan,  
Peter Meyn, Raquel Ordonez Ciriza, Iman Osman, Jared Pinnell, Vanessa Raabe, Sitharam Ramaswami, Amy  
Rapkiewicz, Andre M. Ribeiro-dos-Santos, Marie Samanovic-Golden, Antonio Serrano, Guomiao Shen, Matija Snuderl,  
Theodore Vougiouklakis, Nick Vulpescu, Gael Westby, Paul Zappile, Yutong Zhang  
EPI\_ISL\_430331 hCoV-19/USA/NY-NYUMC304/2020 North America / USA / New York / Manhattan 2020-03-30  
NYU Langone Health Departments of Pathology and Medicine, New York University School of Medicine Maria  
Aguero-Rosenfeld, Brendan Belovarac, Margaret Black, Ludovic Boytard, John Cadley, Paolo Cotzia, John Chen,  
Dacia Dimartino, Xiaojun Feng, Tatyana Gindin, Emily Guzman, Adriana Heguy, Megan Hogan, Emily Huang, George  
Jour, Lawrence H. Lin, Raven Luther, Andrew Lytle, Christian Marier, Matthew T. Maurano, Mark J. Mulligan,  
Peter Meyn, Raquel Ordonez Ciriza, Iman Osman, Jared Pinnell, Vanessa Raabe, Sitharam Ramaswami, Amy  
Rapkiewicz, Andre M. Ribeiro-dos-Santos, Marie Samanovic-Golden, Antonio Serrano, Guomiao Shen, Matija Snuderl,  
Theodore Vougiouklakis, Nick Vulpescu, Gael Westby, Paul Zappile, Yutong Zhang  
EPI\_ISL\_430332 hCoV-19/USA/NY-NYUMC305/2020 North America / USA / New York / Brooklyn 2020-03-30  
NYU Langone Health Departments of Pathology and Medicine, New York University School of Medicine Maria  
Aguero-Rosenfeld, Brendan Belovarac, Margaret Black, Ludovic Boytard, John Cadley, Paolo Cotzia, John Chen,  
Dacia Dimartino, Xiaojun Feng, Tatyana Gindin, Emily Guzman, Adriana Heguy, Megan Hogan, Emily Huang, George  
Jour, Lawrence H. Lin, Raven Luther, Andrew Lytle, Christian Marier, Matthew T. Maurano, Mark J. Mulligan,  
Peter Meyn, Raquel Ordonez Ciriza, Iman Osman, Jared Pinnell, Vanessa Raabe, Sitharam Ramaswami, Amy  
Rapkiewicz, Andre M. Ribeiro-dos-Santos, Marie Samanovic-Golden, Antonio Serrano, Guomiao Shen, Matija Snuderl,  
Theodore Vougiouklakis, Nick Vulpescu, Gael Westby, Paul Zappile, Yutong Zhang  
EPI\_ISL\_430340 hCoV-19/USA/NY-NYUMC313/2020 North America / USA / New York / Westchester County 2020-  
03-30 NYU Langone Health Departments of Pathology and Medicine, New York University School of Medicine  
Maria Aguero-Rosenfeld, Brendan Belovarac, Margaret Black, Ludovic Boytard, John Cadley, Paolo Cotzia, John  
Chen, Dacia Dimartino, Xiaojun Feng, Tatyana Gindin, Emily Guzman, Adriana Heguy, Megan Hogan, Emily Huang,  
George Jour, Lawrence H. Lin, Raven Luther, Andrew Lytle, Christian Marier, Matthew T. Maurano, Mark J.  
Mulligan, Peter Meyn, Raquel Ordonez Ciriza, Iman Osman, Jared Pinnell, Vanessa Raabe, Sitharam Ramaswami, Amy  
Rapkiewicz, Andre M. Ribeiro-dos-Santos, Marie Samanovic-Golden, Antonio Serrano, Guomiao Shen, Matija Snuderl,

Theodore Vougiouklakis, Nick Vulpescu, Gael Westby, Paul Zappile, Yutong Zhang  
EPI\_ISL\_430341 hCoV-19/USA/NY-NYUMC314/2020 North America / USA / New York / Brooklyn 2020-03-30  
NYU Langone Health Departments of Pathology and Medicine, New York University School of Medicine Maria  
Aguero-Rosenfeld, Brendan Belovarac, Margaret Black, Ludovic Boytard, John Cadley, Paolo Cotzia, John Chen,  
Dacia Dimartino, Xiaojun Feng, Tatyana Gindin, Emily Guzman, Adriana Heguy, Megan Hogan, Emily Huang, George  
Jour, Lawrence H. Lin, Raven Luther, Andrew Lytle, Christian Marier, Matthew T. Maurano, Mark J. Mulligan,  
Peter Meyn, Raquel Ordonez Ciriza, Iman Osman, Jared Pinnell, Vanessa Raabe, Sitharam Ramaswami, Amy  
Rapkiewicz, Andre M. Ribeiro-dos-Santos, Marie Samanovic-Golden, Antonio Serrano, Guomiao Shen, Matija Snuderl,  
Theodore Vougiouklakis, Nick Vulpescu, Gael Westby, Paul Zappile, Yutong Zhang  
EPI\_ISL\_430342 hCoV-19/USA/NY-NYUMC315/2020 North America / USA / New York / Queens 2020-03-30 NYU  
Langone Health Departments of Pathology and Medicine, New York University School of Medicine Maria Aguero-  
Rosenfeld, Brendan Belovarac, Margaret Black, Ludovic Boytard, John Cadley, Paolo Cotzia, John Chen, Dacia  
Dimartino, Xiaojun Feng, Tatyana Gindin, Emily Guzman, Adriana Heguy, Megan Hogan, Emily Huang, George Jour,  
Lawrence H. Lin, Raven Luther, Andrew Lytle, Christian Marier, Matthew T. Maurano, Mark J. Mulligan, Peter  
Meyn, Raquel Ordonez Ciriza, Iman Osman, Jared Pinnell, Vanessa Raabe, Sitharam Ramaswami, Amy Rapkiewicz,  
Andre M. Ribeiro-dos-Santos, Marie Samanovic-Golden, Antonio Serrano, Guomiao Shen, Matija Snuderl, Theodore  
Vougiouklakis, Nick Vulpescu, Gael Westby, Paul Zappile, Yutong Zhang  
EPI\_ISL\_430344 hCoV-19/USA/NY-NYUMC317/2020 North America / USA / New York / Brooklyn 2020-03-30  
NYU Langone Health Departments of Pathology and Medicine, New York University School of Medicine Maria  
Aguero-Rosenfeld, Brendan Belovarac, Margaret Black, Ludovic Boytard, John Cadley, Paolo Cotzia, John Chen,  
Dacia Dimartino, Xiaojun Feng, Tatyana Gindin, Emily Guzman, Adriana Heguy, Megan Hogan, Emily Huang, George  
Jour, Lawrence H. Lin, Raven Luther, Andrew Lytle, Christian Marier, Matthew T. Maurano, Mark J. Mulligan,  
Peter Meyn, Raquel Ordonez Ciriza, Iman Osman, Jared Pinnell, Vanessa Raabe, Sitharam Ramaswami, Amy  
Rapkiewicz, Andre M. Ribeiro-dos-Santos, Marie Samanovic-Golden, Antonio Serrano, Guomiao Shen, Matija Snuderl,  
Theodore Vougiouklakis, Nick Vulpescu, Gael Westby, Paul Zappile, Yutong Zhang  
EPI\_ISL\_430345 hCoV-19/USA/NY-NYUMC318/2020 North America / USA / New York / Manhattan 2020-03-30  
NYU Langone Health Departments of Pathology and Medicine, New York University School of Medicine Maria  
Aguero-Rosenfeld, Brendan Belovarac, Margaret Black, Ludovic Boytard, John Cadley, Paolo Cotzia, John Chen,  
Dacia Dimartino, Xiaojun Feng, Tatyana Gindin, Emily Guzman, Adriana Heguy, Megan Hogan, Emily Huang, George  
Jour, Lawrence H. Lin, Raven Luther, Andrew Lytle, Christian Marier, Matthew T. Maurano, Mark J. Mulligan,  
Peter Meyn, Raquel Ordonez Ciriza, Iman Osman, Jared Pinnell, Vanessa Raabe, Sitharam Ramaswami, Amy  
Rapkiewicz, Andre M. Ribeiro-dos-Santos, Marie Samanovic-Golden, Antonio Serrano, Guomiao Shen, Matija Snuderl,  
Theodore Vougiouklakis, Nick Vulpescu, Gael Westby, Paul Zappile, Yutong Zhang  
EPI\_ISL\_430346 hCoV-19/USA/NY-NYUMC319/2020 North America / USA / New York / Brooklyn 2020-03-30  
NYU Langone Health Departments of Pathology and Medicine, New York University School of Medicine Maria  
Aguero-Rosenfeld, Brendan Belovarac, Margaret Black, Ludovic Boytard, John Cadley, Paolo Cotzia, John Chen,  
Dacia Dimartino, Xiaojun Feng, Tatyana Gindin, Emily Guzman, Adriana Heguy, Megan Hogan, Emily Huang, George  
Jour, Lawrence H. Lin, Raven Luther, Andrew Lytle, Christian Marier, Matthew T. Maurano, Mark J. Mulligan,  
Peter Meyn, Raquel Ordonez Ciriza, Iman Osman, Jared Pinnell, Vanessa Raabe, Sitharam Ramaswami, Amy  
Rapkiewicz, Andre M. Ribeiro-dos-Santos, Marie Samanovic-Golden, Antonio Serrano, Guomiao Shen, Matija Snuderl,  
Theodore Vougiouklakis, Nick Vulpescu, Gael Westby, Paul Zappile, Yutong Zhang  
EPI\_ISL\_430347 hCoV-19/USA/NY-NYUMC320/2020 North America / USA / New York / Manhattan 2020-03-30  
NYU Langone Health Departments of Pathology and Medicine, New York University School of Medicine Maria  
Aguero-Rosenfeld, Brendan Belovarac, Margaret Black, Ludovic Boytard, John Cadley, Paolo Cotzia, John Chen,  
Dacia Dimartino, Xiaojun Feng, Tatyana Gindin, Emily Guzman, Adriana Heguy, Megan Hogan, Emily Huang, George  
Jour, Lawrence H. Lin, Raven Luther, Andrew Lytle, Christian Marier, Matthew T. Maurano, Mark J. Mulligan,  
Peter Meyn, Raquel Ordonez Ciriza, Iman Osman, Jared Pinnell, Vanessa Raabe, Sitharam Ramaswami, Amy  
Rapkiewicz, Andre M. Ribeiro-dos-Santos, Marie Samanovic-Golden, Antonio Serrano, Guomiao Shen, Matija Snuderl,  
Theodore Vougiouklakis, Nick Vulpescu, Gael Westby, Paul Zappile, Yutong Zhang  
EPI\_ISL\_430348 hCoV-19/USA/NY-NYUMC321/2020 North America / USA / New York / Manhattan 2020-03-30  
NYU Langone Health Departments of Pathology and Medicine, New York University School of Medicine Maria  
Aguero-Rosenfeld, Brendan Belovarac, Margaret Black, Ludovic Boytard, John Cadley, Paolo Cotzia, John Chen,  
Dacia Dimartino, Xiaojun Feng, Tatyana Gindin, Emily Guzman, Adriana Heguy, Megan Hogan, Emily Huang, George  
Jour, Lawrence H. Lin, Raven Luther, Andrew Lytle, Christian Marier, Matthew T. Maurano, Mark J. Mulligan,  
Peter Meyn, Raquel Ordonez Ciriza, Iman Osman, Jared Pinnell, Vanessa Raabe, Sitharam Ramaswami, Amy  
Rapkiewicz, Andre M. Ribeiro-dos-Santos, Marie Samanovic-Golden, Antonio Serrano, Guomiao Shen, Matija Snuderl,  
Theodore Vougiouklakis, Nick Vulpescu, Gael Westby, Paul Zappile, Yutong Zhang  
EPI\_ISL\_430349 hCoV-19/USA/NY-NYUMC322/2020 North America / USA / New York / Staten Island 2020-03-30  
NYU Langone Health Departments of Pathology and Medicine, New York University School of Medicine Maria  
Aguero-Rosenfeld, Brendan Belovarac, Margaret Black, Ludovic Boytard, John Cadley, Paolo Cotzia, John Chen,  
Dacia Dimartino, Xiaojun Feng, Tatyana Gindin, Emily Guzman, Adriana Heguy, Megan Hogan, Emily Huang, George  
Jour, Lawrence H. Lin, Raven Luther, Andrew Lytle, Christian Marier, Matthew T. Maurano, Mark J. Mulligan,  
Peter Meyn, Raquel Ordonez Ciriza, Iman Osman, Jared Pinnell, Vanessa Raabe, Sitharam Ramaswami, Amy  
Rapkiewicz, Andre M. Ribeiro-dos-Santos, Marie Samanovic-Golden, Antonio Serrano, Guomiao Shen, Matija Snuderl,  
Theodore Vougiouklakis, Nick Vulpescu, Gael Westby, Paul Zappile, Yutong Zhang  
EPI\_ISL\_430350 hCoV-19/USA/NY-NYUMC323/2020 North America / USA / New York / Queens 2020-04-02 NYU  
Langone Health Departments of Pathology and Medicine, New York University School of Medicine Maria Aguero-  
Rosenfeld, Brendan Belovarac, Margaret Black, Ludovic Boytard, John Cadley, Paolo Cotzia, John Chen, Dacia  
Dimartino, Xiaojun Feng, Tatyana Gindin, Emily Guzman, Adriana Heguy, Megan Hogan, Emily Huang, George Jour,  
Lawrence H. Lin, Raven Luther, Andrew Lytle, Christian Marier, Matthew T. Maurano, Mark J. Mulligan, Peter

Meyn, Raquel Ordonez Ciriza, Iman Osman, Jared Pinnell, Vanessa Raabe, Sitharam Ramaswami, Amy Rapkiewicz, Andre M. Ribeiro-dos-Santos, Marie Samanovic-Golden, Antonio Serrano, Guomiao Shen, Matija Snuderl, Theodore Vougiouklakis, Nick Vulpescu, Gael Westby, Paul Zappile, Yutong Zhang  
EPI\_ISL\_430351 hCoV-19/USA/NY-NYUMC324/2020 North America / USA / New York / Brooklyn 2020-03-31  
NYU Langone Health Departments of Pathology and Medicine, New York University School of Medicine Maria Aguero-Rosenfeld, Brendan Belovarac, Margaret Black, Ludovic Boytard, John Cadley, Paolo Cotzia, John Chen, Dacia Dimartino, Xiaojun Feng, Tatyana Gindin, Emily Guzman, Adriana Heguy, Megan Hogan, Emily Huang, George Jour, Lawrence H. Lin, Raven Luther, Andrew Lytle, Christian Marier, Matthew T. Maurano, Mark J. Mulligan, Peter Meyn, Raquel Ordonez Ciriza, Iman Osman, Jared Pinnell, Vanessa Raabe, Sitharam Ramaswami, Amy Rapkiewicz, Andre M. Ribeiro-dos-Santos, Marie Samanovic-Golden, Antonio Serrano, Guomiao Shen, Matija Snuderl, Theodore Vougiouklakis, Nick Vulpescu, Gael Westby, Paul Zappile, Yutong Zhang  
EPI\_ISL\_430352 hCoV-19/USA/NY-NYUMC325/2020 North America / USA / New York / Suffolk County 2020-04-01  
NYU Langone Health Departments of Pathology and Medicine, New York University School of Medicine Maria Aguero-Rosenfeld, Brendan Belovarac, Margaret Black, Ludovic Boytard, John Cadley, Paolo Cotzia, John Chen, Dacia Dimartino, Xiaojun Feng, Tatyana Gindin, Emily Guzman, Adriana Heguy, Megan Hogan, Emily Huang, George Jour, Lawrence H. Lin, Raven Luther, Andrew Lytle, Christian Marier, Matthew T. Maurano, Mark J. Mulligan, Peter Meyn, Raquel Ordonez Ciriza, Iman Osman, Jared Pinnell, Vanessa Raabe, Sitharam Ramaswami, Amy Rapkiewicz, Andre M. Ribeiro-dos-Santos, Marie Samanovic-Golden, Antonio Serrano, Guomiao Shen, Matija Snuderl, Theodore Vougiouklakis, Nick Vulpescu, Gael Westby, Paul Zappile, Yutong Zhang  
EPI\_ISL\_430353 hCoV-19/USA/NY-NYUMC326/2020 North America / USA / New York / Brooklyn 2020-04-01  
NYU Langone Health Departments of Pathology and Medicine, New York University School of Medicine Maria Aguero-Rosenfeld, Brendan Belovarac, Margaret Black, Ludovic Boytard, John Cadley, Paolo Cotzia, John Chen, Dacia Dimartino, Xiaojun Feng, Tatyana Gindin, Emily Guzman, Adriana Heguy, Megan Hogan, Emily Huang, George Jour, Lawrence H. Lin, Raven Luther, Andrew Lytle, Christian Marier, Matthew T. Maurano, Mark J. Mulligan, Peter Meyn, Raquel Ordonez Ciriza, Iman Osman, Jared Pinnell, Vanessa Raabe, Sitharam Ramaswami, Amy Rapkiewicz, Andre M. Ribeiro-dos-Santos, Marie Samanovic-Golden, Antonio Serrano, Guomiao Shen, Matija Snuderl, Theodore Vougiouklakis, Nick Vulpescu, Gael Westby, Paul Zappile, Yutong Zhang  
EPI\_ISL\_430354 hCoV-19/USA/NY-NYUMC327/2020 North America / USA / New York / Nassau County 2020-04-03  
NYU Langone Health Departments of Pathology and Medicine, New York University School of Medicine Maria Aguero-Rosenfeld, Brendan Belovarac, Margaret Black, Ludovic Boytard, John Cadley, Paolo Cotzia, John Chen, Dacia Dimartino, Xiaojun Feng, Tatyana Gindin, Emily Guzman, Adriana Heguy, Megan Hogan, Emily Huang, George Jour, Lawrence H. Lin, Raven Luther, Andrew Lytle, Christian Marier, Matthew T. Maurano, Mark J. Mulligan, Peter Meyn, Raquel Ordonez Ciriza, Iman Osman, Jared Pinnell, Vanessa Raabe, Sitharam Ramaswami, Amy Rapkiewicz, Andre M. Ribeiro-dos-Santos, Marie Samanovic-Golden, Antonio Serrano, Guomiao Shen, Matija Snuderl, Theodore Vougiouklakis, Nick Vulpescu, Gael Westby, Paul Zappile, Yutong Zhang  
EPI\_ISL\_430377 hCoV-19/USA/NY-NYUMC350/2020 North America / USA / New York / Brooklyn 2020-04-08  
NYU Langone Health Departments of Pathology and Medicine, New York University School of Medicine Maria Aguero-Rosenfeld, Brendan Belovarac, Margaret Black, Ludovic Boytard, John Cadley, Paolo Cotzia, John Chen, Dacia Dimartino, Xiaojun Feng, Tatyana Gindin, Emily Guzman, Adriana Heguy, Megan Hogan, Emily Huang, George Jour, Lawrence H. Lin, Raven Luther, Andrew Lytle, Christian Marier, Matthew T. Maurano, Mark J. Mulligan, Peter Meyn, Raquel Ordonez Ciriza, Iman Osman, Jared Pinnell, Vanessa Raabe, Sitharam Ramaswami, Amy Rapkiewicz, Andre M. Ribeiro-dos-Santos, Marie Samanovic-Golden, Antonio Serrano, Guomiao Shen, Matija Snuderl, Theodore Vougiouklakis, Nick Vulpescu, Gael Westby, Paul Zappile, Yutong Zhang  
EPI\_ISL\_430378 hCoV-19/USA/NY-NYUMC351/2020 North America / USA / New York / Brooklyn 2020-04-07  
NYU Langone Health Departments of Pathology and Medicine, New York University School of Medicine Maria Aguero-Rosenfeld, Brendan Belovarac, Margaret Black, Ludovic Boytard, John Cadley, Paolo Cotzia, John Chen, Dacia Dimartino, Xiaojun Feng, Tatyana Gindin, Emily Guzman, Adriana Heguy, Megan Hogan, Emily Huang, George Jour, Lawrence H. Lin, Raven Luther, Andrew Lytle, Christian Marier, Matthew T. Maurano, Mark J. Mulligan, Peter Meyn, Raquel Ordonez Ciriza, Iman Osman, Jared Pinnell, Vanessa Raabe, Sitharam Ramaswami, Amy Rapkiewicz, Andre M. Ribeiro-dos-Santos, Marie Samanovic-Golden, Antonio Serrano, Guomiao Shen, Matija Snuderl, Theodore Vougiouklakis, Nick Vulpescu, Gael Westby, Paul Zappile, Yutong Zhang  
EPI\_ISL\_430379 hCoV-19/USA/NY-NYUMC352/2020 North America / USA / New York / Brooklyn 2020-04-07  
NYU Langone Health Departments of Pathology and Medicine, New York University School of Medicine Maria Aguero-Rosenfeld, Brendan Belovarac, Margaret Black, Ludovic Boytard, John Cadley, Paolo Cotzia, John Chen, Dacia Dimartino, Xiaojun Feng, Tatyana Gindin, Emily Guzman, Adriana Heguy, Megan Hogan, Emily Huang, George Jour, Lawrence H. Lin, Raven Luther, Andrew Lytle, Christian Marier, Matthew T. Maurano, Mark J. Mulligan, Peter Meyn, Raquel Ordonez Ciriza, Iman Osman, Jared Pinnell, Vanessa Raabe, Sitharam Ramaswami, Amy Rapkiewicz, Andre M. Ribeiro-dos-Santos, Marie Samanovic-Golden, Antonio Serrano, Guomiao Shen, Matija Snuderl, Theodore Vougiouklakis, Nick Vulpescu, Gael Westby, Paul Zappile, Yutong Zhang  
EPI\_ISL\_430380 hCoV-19/USA/NY-NYUMC353/2020 North America / USA / New York / Queens 2020-04-08 NYU  
Langone Health Departments of Pathology and Medicine, New York University School of Medicine Maria Aguero-Rosenfeld, Brendan Belovarac, Margaret Black, Ludovic Boytard, John Cadley, Paolo Cotzia, John Chen, Dacia Dimartino, Xiaojun Feng, Tatyana Gindin, Emily Guzman, Adriana Heguy, Megan Hogan, Emily Huang, George Jour, Lawrence H. Lin, Raven Luther, Andrew Lytle, Christian Marier, Matthew T. Maurano, Mark J. Mulligan, Peter Meyn, Raquel Ordonez Ciriza, Iman Osman, Jared Pinnell, Vanessa Raabe, Sitharam Ramaswami, Amy Rapkiewicz, Andre M. Ribeiro-dos-Santos, Marie Samanovic-Golden, Antonio Serrano, Guomiao Shen, Matija Snuderl, Theodore Vougiouklakis, Nick Vulpescu, Gael Westby, Paul Zappile, Yutong Zhang  
EPI\_ISL\_430381 hCoV-19/USA/NY-NYUMC354/2020 North America / USA / New York / Brooklyn 2020-04-07  
NYU Langone Health Departments of Pathology and Medicine, New York University School of Medicine Maria Aguero-Rosenfeld, Brendan Belovarac, Margaret Black, Ludovic Boytard, John Cadley, Paolo Cotzia, John Chen,

Dacia Dimartino, Xiaojun Feng, Tatyana Gindin, Emily Guzman, Adriana Heguy, Megan Hogan, Emily Huang, George Jour, Lawrence H. Lin, Raven Luther, Andrew Lytle, Christian Marier, Matthew T. Maurano, Mark J. Mulligan, Peter Meyn, Raquel Ordonez Ciriza, Iman Osman, Jared Pinnell, Vanessa Raabe, Sitharam Ramaswami, Amy Rapkiewicz, Andre M. Ribeiro-dos-Santos, Marie Samanovic-Golden, Antonio Serrano, Guomiao Shen, Matija Snuderl, Theodore Vougiouklakis, Nick Vulpescu, Gael Westby, Paul Zappile, Yutong Zhang  
EPI\_ISL\_430382 hCoV-19/USA/NY-NYUMC355/2020 North America / USA / New York / Brooklyn 2020-04-09  
NYU Langone Health Departments of Pathology and Medicine, New York University School of Medicine Maria Aguerro-Rosenfeld, Brendan Belovarac, Margaret Black, Ludovic Boytard, John Cadley, Paolo Cotzia, John Chen, Dacia Dimartino, Xiaojun Feng, Tatyana Gindin, Emily Guzman, Adriana Heguy, Megan Hogan, Emily Huang, George Jour, Lawrence H. Lin, Raven Luther, Andrew Lytle, Christian Marier, Matthew T. Maurano, Mark J. Mulligan, Peter Meyn, Raquel Ordonez Ciriza, Iman Osman, Jared Pinnell, Vanessa Raabe, Sitharam Ramaswami, Amy Rapkiewicz, Andre M. Ribeiro-dos-Santos, Marie Samanovic-Golden, Antonio Serrano, Guomiao Shen, Matija Snuderl, Theodore Vougiouklakis, Nick Vulpescu, Gael Westby, Paul Zappile, Yutong Zhang  
EPI\_ISL\_430383 hCoV-19/USA/NY-NYUMC356/2020 North America / USA / New York / Brooklyn 2020-04-08  
NYU Langone Health Departments of Pathology and Medicine, New York University School of Medicine Maria Aguerro-Rosenfeld, Brendan Belovarac, Margaret Black, Ludovic Boytard, John Cadley, Paolo Cotzia, John Chen, Dacia Dimartino, Xiaojun Feng, Tatyana Gindin, Emily Guzman, Adriana Heguy, Megan Hogan, Emily Huang, George Jour, Lawrence H. Lin, Raven Luther, Andrew Lytle, Christian Marier, Matthew T. Maurano, Mark J. Mulligan, Peter Meyn, Raquel Ordonez Ciriza, Iman Osman, Jared Pinnell, Vanessa Raabe, Sitharam Ramaswami, Amy Rapkiewicz, Andre M. Ribeiro-dos-Santos, Marie Samanovic-Golden, Antonio Serrano, Guomiao Shen, Matija Snuderl, Theodore Vougiouklakis, Nick Vulpescu, Gael Westby, Paul Zappile, Yutong Zhang  
EPI\_ISL\_430384 hCoV-19/USA/NY-NYUMC357/2020 North America / USA / New York / Brooklyn 2020-04-09  
NYU Langone Health Departments of Pathology and Medicine, New York University School of Medicine Maria Aguerro-Rosenfeld, Brendan Belovarac, Margaret Black, Ludovic Boytard, John Cadley, Paolo Cotzia, John Chen, Dacia Dimartino, Xiaojun Feng, Tatyana Gindin, Emily Guzman, Adriana Heguy, Megan Hogan, Emily Huang, George Jour, Lawrence H. Lin, Raven Luther, Andrew Lytle, Christian Marier, Matthew T. Maurano, Mark J. Mulligan, Peter Meyn, Raquel Ordonez Ciriza, Iman Osman, Jared Pinnell, Vanessa Raabe, Sitharam Ramaswami, Amy Rapkiewicz, Andre M. Ribeiro-dos-Santos, Marie Samanovic-Golden, Antonio Serrano, Guomiao Shen, Matija Snuderl, Theodore Vougiouklakis, Nick Vulpescu, Gael Westby, Paul Zappile, Yutong Zhang  
EPI\_ISL\_430385 hCoV-19/USA/NY-NYUMC358/2020 North America / USA / New York / Brooklyn 2020-04-08  
NYU Langone Health Departments of Pathology and Medicine, New York University School of Medicine Maria Aguerro-Rosenfeld, Brendan Belovarac, Margaret Black, Ludovic Boytard, John Cadley, Paolo Cotzia, John Chen, Dacia Dimartino, Xiaojun Feng, Tatyana Gindin, Emily Guzman, Adriana Heguy, Megan Hogan, Emily Huang, George Jour, Lawrence H. Lin, Raven Luther, Andrew Lytle, Christian Marier, Matthew T. Maurano, Mark J. Mulligan, Peter Meyn, Raquel Ordonez Ciriza, Iman Osman, Jared Pinnell, Vanessa Raabe, Sitharam Ramaswami, Amy Rapkiewicz, Andre M. Ribeiro-dos-Santos, Marie Samanovic-Golden, Antonio Serrano, Guomiao Shen, Matija Snuderl, Theodore Vougiouklakis, Nick Vulpescu, Gael Westby, Paul Zappile, Yutong Zhang  
EPI\_ISL\_430386 hCoV-19/USA/NY-NYUMC359/2020 North America / USA / New York / Brooklyn 2020-04-08  
NYU Langone Health Departments of Pathology and Medicine, New York University School of Medicine Maria Aguerro-Rosenfeld, Brendan Belovarac, Margaret Black, Ludovic Boytard, John Cadley, Paolo Cotzia, John Chen, Dacia Dimartino, Xiaojun Feng, Tatyana Gindin, Emily Guzman, Adriana Heguy, Megan Hogan, Emily Huang, George Jour, Lawrence H. Lin, Raven Luther, Andrew Lytle, Christian Marier, Matthew T. Maurano, Mark J. Mulligan, Peter Meyn, Raquel Ordonez Ciriza, Iman Osman, Jared Pinnell, Vanessa Raabe, Sitharam Ramaswami, Amy Rapkiewicz, Andre M. Ribeiro-dos-Santos, Marie Samanovic-Golden, Antonio Serrano, Guomiao Shen, Matija Snuderl, Theodore Vougiouklakis, Nick Vulpescu, Gael Westby, Paul Zappile, Yutong Zhang  
EPI\_ISL\_430387 hCoV-19/USA/NY-NYUMC360/2020 North America / USA / New York / Brooklyn 2020-04-08  
NYU Langone Health Departments of Pathology and Medicine, New York University School of Medicine Maria Aguerro-Rosenfeld, Brendan Belovarac, Margaret Black, Ludovic Boytard, John Cadley, Paolo Cotzia, John Chen, Dacia Dimartino, Xiaojun Feng, Tatyana Gindin, Emily Guzman, Adriana Heguy, Megan Hogan, Emily Huang, George Jour, Lawrence H. Lin, Raven Luther, Andrew Lytle, Christian Marier, Matthew T. Maurano, Mark J. Mulligan, Peter Meyn, Raquel Ordonez Ciriza, Iman Osman, Jared Pinnell, Vanessa Raabe, Sitharam Ramaswami, Amy Rapkiewicz, Andre M. Ribeiro-dos-Santos, Marie Samanovic-Golden, Antonio Serrano, Guomiao Shen, Matija Snuderl, Theodore Vougiouklakis, Nick Vulpescu, Gael Westby, Paul Zappile, Yutong Zhang  
EPI\_ISL\_430388 hCoV-19/USA/NY-NYUMC361/2020 North America / USA / New York / Queens 2020-04-09 NYU Langone Health Departments of Pathology and Medicine, New York University School of Medicine Maria Aguerro-Rosenfeld, Brendan Belovarac, Margaret Black, Ludovic Boytard, John Cadley, Paolo Cotzia, John Chen, Dacia Dimartino, Xiaojun Feng, Tatyana Gindin, Emily Guzman, Adriana Heguy, Megan Hogan, Emily Huang, George Jour, Lawrence H. Lin, Raven Luther, Andrew Lytle, Christian Marier, Matthew T. Maurano, Mark J. Mulligan, Peter Meyn, Raquel Ordonez Ciriza, Iman Osman, Jared Pinnell, Vanessa Raabe, Sitharam Ramaswami, Amy Rapkiewicz, Andre M. Ribeiro-dos-Santos, Marie Samanovic-Golden, Antonio Serrano, Guomiao Shen, Matija Snuderl, Theodore Vougiouklakis, Nick Vulpescu, Gael Westby, Paul Zappile, Yutong Zhang  
EPI\_ISL\_430389 hCoV-19/USA/NY-NYUMC362/2020 North America / USA / New York / Brooklyn 2020-04-08  
NYU Langone Health Departments of Pathology and Medicine, New York University School of Medicine Maria Aguerro-Rosenfeld, Brendan Belovarac, Margaret Black, Ludovic Boytard, John Cadley, Paolo Cotzia, John Chen, Dacia Dimartino, Xiaojun Feng, Tatyana Gindin, Emily Guzman, Adriana Heguy, Megan Hogan, Emily Huang, George Jour, Lawrence H. Lin, Raven Luther, Andrew Lytle, Christian Marier, Matthew T. Maurano, Mark J. Mulligan, Peter Meyn, Raquel Ordonez Ciriza, Iman Osman, Jared Pinnell, Vanessa Raabe, Sitharam Ramaswami, Amy Rapkiewicz, Andre M. Ribeiro-dos-Santos, Marie Samanovic-Golden, Antonio Serrano, Guomiao Shen, Matija Snuderl, Theodore Vougiouklakis, Nick Vulpescu, Gael Westby, Paul Zappile, Yutong Zhang  
EPI\_ISL\_430390 hCoV-19/USA/NY-NYUMC363/2020 North America / USA / New York / Brooklyn 2020-04-08

NYU Langone Health Departments of Pathology and Medicine, New York University School of Medicine Maria Aguerro-Rosenfeld, Brendan Belovarac, Margaret Black, Ludovic Boytard, John Cadley, Paolo Cotzia, John Chen, Dacia Dimartino, Xiaojun Feng, Tatyana Gindin, Emily Guzman, Adriana Heguy, Megan Hogan, Emily Huang, George Jour, Lawrence H. Lin, Raven Luther, Andrew Lytle, Christian Marier, Matthew T. Maurano, Mark J. Mulligan, Peter Meyn, Raquel Ordonez Ciriza, Iman Osman, Jared Pinnell, Vanessa Raabe, Sitharam Ramaswami, Amy Rapkiewicz, Andre M. Ribeiro-dos-Santos, Marie Samanovic-Golden, Antonio Serrano, Guomiao Shen, Matija Snuderl, Theodore Vougiouklakis, Nick Vulpescu, Gael Westby, Paul Zappile, Yutong Zhang  
EPI\_ISL\_430391 hCoV-19/USA/NY-NYUMC364/2020 North America / USA / New York / Queens 2020-04-09 NYU  
NYU Langone Health Departments of Pathology and Medicine, New York University School of Medicine Maria Aguerro-Rosenfeld, Brendan Belovarac, Margaret Black, Ludovic Boytard, John Cadley, Paolo Cotzia, John Chen, Dacia Dimartino, Xiaojun Feng, Tatyana Gindin, Emily Guzman, Adriana Heguy, Megan Hogan, Emily Huang, George Jour, Lawrence H. Lin, Raven Luther, Andrew Lytle, Christian Marier, Matthew T. Maurano, Mark J. Mulligan, Peter Meyn, Raquel Ordonez Ciriza, Iman Osman, Jared Pinnell, Vanessa Raabe, Sitharam Ramaswami, Amy Rapkiewicz, Andre M. Ribeiro-dos-Santos, Marie Samanovic-Golden, Antonio Serrano, Guomiao Shen, Matija Snuderl, Theodore Vougiouklakis, Nick Vulpescu, Gael Westby, Paul Zappile, Yutong Zhang  
EPI\_ISL\_430392 hCoV-19/USA/NY-NYUMC365/2020 North America / USA / New York / Brooklyn 2020-04-08  
NYU Langone Health Departments of Pathology and Medicine, New York University School of Medicine Maria Aguerro-Rosenfeld, Brendan Belovarac, Margaret Black, Ludovic Boytard, John Cadley, Paolo Cotzia, John Chen, Dacia Dimartino, Xiaojun Feng, Tatyana Gindin, Emily Guzman, Adriana Heguy, Megan Hogan, Emily Huang, George Jour, Lawrence H. Lin, Raven Luther, Andrew Lytle, Christian Marier, Matthew T. Maurano, Mark J. Mulligan, Peter Meyn, Raquel Ordonez Ciriza, Iman Osman, Jared Pinnell, Vanessa Raabe, Sitharam Ramaswami, Amy Rapkiewicz, Andre M. Ribeiro-dos-Santos, Marie Samanovic-Golden, Antonio Serrano, Guomiao Shen, Matija Snuderl, Theodore Vougiouklakis, Nick Vulpescu, Gael Westby, Paul Zappile, Yutong Zhang  
EPI\_ISL\_430393 hCoV-19/USA/NY-NYUMC366/2020 North America / USA / New York / Manhattan 2020-04-09  
NYU Langone Health Departments of Pathology and Medicine, New York University School of Medicine Maria Aguerro-Rosenfeld, Brendan Belovarac, Margaret Black, Ludovic Boytard, John Cadley, Paolo Cotzia, John Chen, Dacia Dimartino, Xiaojun Feng, Tatyana Gindin, Emily Guzman, Adriana Heguy, Megan Hogan, Emily Huang, George Jour, Lawrence H. Lin, Raven Luther, Andrew Lytle, Christian Marier, Matthew T. Maurano, Mark J. Mulligan, Peter Meyn, Raquel Ordonez Ciriza, Iman Osman, Jared Pinnell, Vanessa Raabe, Sitharam Ramaswami, Amy Rapkiewicz, Andre M. Ribeiro-dos-Santos, Marie Samanovic-Golden, Antonio Serrano, Guomiao Shen, Matija Snuderl, Theodore Vougiouklakis, Nick Vulpescu, Gael Westby, Paul Zappile, Yutong Zhang  
EPI\_ISL\_430394 hCoV-19/USA/NJ-NYUMC367/2020 North America / USA / New Jersey / Hudson County 2020-04-09  
NYU Langone Health Departments of Pathology and Medicine, New York University School of Medicine Maria Aguerro-Rosenfeld, Brendan Belovarac, Margaret Black, Ludovic Boytard, John Cadley, Paolo Cotzia, John Chen, Dacia Dimartino, Xiaojun Feng, Tatyana Gindin, Emily Guzman, Adriana Heguy, Megan Hogan, Emily Huang, George Jour, Lawrence H. Lin, Raven Luther, Andrew Lytle, Christian Marier, Matthew T. Maurano, Mark J. Mulligan, Peter Meyn, Raquel Ordonez Ciriza, Iman Osman, Jared Pinnell, Vanessa Raabe, Sitharam Ramaswami, Amy Rapkiewicz, Andre M. Ribeiro-dos-Santos, Marie Samanovic-Golden, Antonio Serrano, Guomiao Shen, Matija Snuderl, Theodore Vougiouklakis, Nick Vulpescu, Gael Westby, Paul Zappile, Yutong Zhang  
EPI\_ISL\_430395 hCoV-19/USA/NY-NYUMC368/2020 North America / USA / New York / Brooklyn 2020-04-09  
NYU Langone Health Departments of Pathology and Medicine, New York University School of Medicine Maria Aguerro-Rosenfeld, Brendan Belovarac, Margaret Black, Ludovic Boytard, John Cadley, Paolo Cotzia, John Chen, Dacia Dimartino, Xiaojun Feng, Tatyana Gindin, Emily Guzman, Adriana Heguy, Megan Hogan, Emily Huang, George Jour, Lawrence H. Lin, Raven Luther, Andrew Lytle, Christian Marier, Matthew T. Maurano, Mark J. Mulligan, Peter Meyn, Raquel Ordonez Ciriza, Iman Osman, Jared Pinnell, Vanessa Raabe, Sitharam Ramaswami, Amy Rapkiewicz, Andre M. Ribeiro-dos-Santos, Marie Samanovic-Golden, Antonio Serrano, Guomiao Shen, Matija Snuderl, Theodore Vougiouklakis, Nick Vulpescu, Gael Westby, Paul Zappile, Yutong Zhang  
EPI\_ISL\_430396 hCoV-19/USA/NY-NYUMC369/2020 North America / USA / New York / Nassau County 2020-04-10  
NYU Langone Health Departments of Pathology and Medicine, New York University School of Medicine Maria Aguerro-Rosenfeld, Brendan Belovarac, Margaret Black, Ludovic Boytard, John Cadley, Paolo Cotzia, John Chen, Dacia Dimartino, Xiaojun Feng, Tatyana Gindin, Emily Guzman, Adriana Heguy, Megan Hogan, Emily Huang, George Jour, Lawrence H. Lin, Raven Luther, Andrew Lytle, Christian Marier, Matthew T. Maurano, Mark J. Mulligan, Peter Meyn, Raquel Ordonez Ciriza, Iman Osman, Jared Pinnell, Vanessa Raabe, Sitharam Ramaswami, Amy Rapkiewicz, Andre M. Ribeiro-dos-Santos, Marie Samanovic-Golden, Antonio Serrano, Guomiao Shen, Matija Snuderl, Theodore Vougiouklakis, Nick Vulpescu, Gael Westby, Paul Zappile, Yutong Zhang  
EPI\_ISL\_430397 hCoV-19/USA/NY-NYUMC370/2020 North America / USA / New York / Nassau County 2020-04-09  
NYU Langone Health Departments of Pathology and Medicine, New York University School of Medicine Maria Aguerro-Rosenfeld, Brendan Belovarac, Margaret Black, Ludovic Boytard, John Cadley, Paolo Cotzia, John Chen, Dacia Dimartino, Xiaojun Feng, Tatyana Gindin, Emily Guzman, Adriana Heguy, Megan Hogan, Emily Huang, George Jour, Lawrence H. Lin, Raven Luther, Andrew Lytle, Christian Marier, Matthew T. Maurano, Mark J. Mulligan, Peter Meyn, Raquel Ordonez Ciriza, Iman Osman, Jared Pinnell, Vanessa Raabe, Sitharam Ramaswami, Amy Rapkiewicz, Andre M. Ribeiro-dos-Santos, Marie Samanovic-Golden, Antonio Serrano, Guomiao Shen, Matija Snuderl, Theodore Vougiouklakis, Nick Vulpescu, Gael Westby, Paul Zappile, Yutong Zhang  
EPI\_ISL\_430398 hCoV-19/USA/NY-NYUMC371/2020 North America / USA / New York / Nassau County 2020-04-10  
NYU Langone Health Departments of Pathology and Medicine, New York University School of Medicine Maria Aguerro-Rosenfeld, Brendan Belovarac, Margaret Black, Ludovic Boytard, John Cadley, Paolo Cotzia, John Chen, Dacia Dimartino, Xiaojun Feng, Tatyana Gindin, Emily Guzman, Adriana Heguy, Megan Hogan, Emily Huang, George Jour, Lawrence H. Lin, Raven Luther, Andrew Lytle, Christian Marier, Matthew T. Maurano, Mark J. Mulligan, Peter Meyn, Raquel Ordonez Ciriza, Iman Osman, Jared Pinnell, Vanessa Raabe, Sitharam Ramaswami, Amy Rapkiewicz, Andre M. Ribeiro-dos-Santos, Marie Samanovic-Golden, Antonio Serrano, Guomiao Shen, Matija Snuderl,

Theodore Vougiouklakis, Nick Vulpescu, Gael Westby, Paul Zappile, Yutong Zhang  
EPI\_ISL\_430399 hCoV-19/USA/NY-NYUMC372/2020 North America / USA / New York / Nassau County 2020-04-10  
NYU Langone Health Departments of Pathology and Medicine, New York University School of Medicine Maria  
Aguero-Rosenfeld, Brendan Belovarac, Margaret Black, Ludovic Boytard, John Cadley, Paolo Cotzia, John Chen,  
Dacia Dimartino, Xiaojun Feng, Tatyana Gindin, Emily Guzman, Adriana Heguy, Megan Hogan, Emily Huang, George  
Jour, Lawrence H. Lin, Raven Luther, Andrew Lytle, Christian Marier, Matthew T. Maurano, Mark J. Mulligan,  
Peter Meyn, Raquel Ordonez Ciriza, Iman Osman, Jared Pinnell, Vanessa Raabe, Sitharam Ramaswami, Amy  
Rapkiewicz, Andre M. Ribeiro-dos-Santos, Marie Samanovic-Golden, Antonio Serrano, Guomiao Shen, Matija Snuderl,  
Theodore Vougiouklakis, Nick Vulpescu, Gael Westby, Paul Zappile, Yutong Zhang  
EPI\_ISL\_430400 hCoV-19/USA/NY-NYUMC373/2020 North America / USA / New York / Brooklyn 2020-04-10  
NYU Langone Health Departments of Pathology and Medicine, New York University School of Medicine Maria  
Aguero-Rosenfeld, Brendan Belovarac, Margaret Black, Ludovic Boytard, John Cadley, Paolo Cotzia, John Chen,  
Dacia Dimartino, Xiaojun Feng, Tatyana Gindin, Emily Guzman, Adriana Heguy, Megan Hogan, Emily Huang, George  
Jour, Lawrence H. Lin, Raven Luther, Andrew Lytle, Christian Marier, Matthew T. Maurano, Mark J. Mulligan,  
Peter Meyn, Raquel Ordonez Ciriza, Iman Osman, Jared Pinnell, Vanessa Raabe, Sitharam Ramaswami, Amy  
Rapkiewicz, Andre M. Ribeiro-dos-Santos, Marie Samanovic-Golden, Antonio Serrano, Guomiao Shen, Matija Snuderl,  
Theodore Vougiouklakis, Nick Vulpescu, Gael Westby, Paul Zappile, Yutong Zhang  
EPI\_ISL\_430401 hCoV-19/USA/CT-NYUMC374/2020 North America / USA / Connecticut / Fairfield County 2020-  
04-10 NYU Langone Health Departments of Pathology and Medicine, New York University School of Medicine  
Maria Aguero-Rosenfeld, Brendan Belovarac, Margaret Black, Ludovic Boytard, John Cadley, Paolo Cotzia, John  
Chen, Dacia Dimartino, Xiaojun Feng, Tatyana Gindin, Emily Guzman, Adriana Heguy, Megan Hogan, Emily Huang,  
George Jour, Lawrence H. Lin, Raven Luther, Andrew Lytle, Christian Marier, Matthew T. Maurano, Mark J.  
Mulligan, Peter Meyn, Raquel Ordonez Ciriza, Iman Osman, Jared Pinnell, Vanessa Raabe, Sitharam Ramaswami, Amy  
Rapkiewicz, Andre M. Ribeiro-dos-Santos, Marie Samanovic-Golden, Antonio Serrano, Guomiao Shen, Matija Snuderl,  
Theodore Vougiouklakis, Nick Vulpescu, Gael Westby, Paul Zappile, Yutong Zhang  
EPI\_ISL\_430402 hCoV-19/USA/NY-NYUMC375/2020 North America / USA / New York / Brooklyn 2020-04-10  
NYU Langone Health Departments of Pathology and Medicine, New York University School of Medicine Maria  
Aguero-Rosenfeld, Brendan Belovarac, Margaret Black, Ludovic Boytard, John Cadley, Paolo Cotzia, John Chen,  
Dacia Dimartino, Xiaojun Feng, Tatyana Gindin, Emily Guzman, Adriana Heguy, Megan Hogan, Emily Huang, George  
Jour, Lawrence H. Lin, Raven Luther, Andrew Lytle, Christian Marier, Matthew T. Maurano, Mark J. Mulligan,  
Peter Meyn, Raquel Ordonez Ciriza, Iman Osman, Jared Pinnell, Vanessa Raabe, Sitharam Ramaswami, Amy  
Rapkiewicz, Andre M. Ribeiro-dos-Santos, Marie Samanovic-Golden, Antonio Serrano, Guomiao Shen, Matija Snuderl,  
Theodore Vougiouklakis, Nick Vulpescu, Gael Westby, Paul Zappile, Yutong Zhang  
EPI\_ISL\_430403 hCoV-19/USA/NJ-NYUMC376/2020 North America / USA / New York 2020-04-10 NYU Langone  
Health Departments of Pathology and Medicine, New York University School of Medicine Maria Aguero-Rosenfeld,  
Brendan Belovarac, Margaret Black, Ludovic Boytard, John Cadley, Paolo Cotzia, John Chen, Dacia Dimartino,  
Xiaojun Feng, Tatyana Gindin, Emily Guzman, Adriana Heguy, Megan Hogan, Emily Huang, George Jour, Lawrence H.  
Lin, Raven Luther, Andrew Lytle, Christian Marier, Matthew T. Maurano, Mark J. Mulligan, Peter Meyn, Raquel  
Ordonez Ciriza, Iman Osman, Jared Pinnell, Vanessa Raabe, Sitharam Ramaswami, Amy Rapkiewicz, Andre M. Ribeiro-  
dos-Santos, Marie Samanovic-Golden, Antonio Serrano, Guomiao Shen, Matija Snuderl, Theodore Vougiouklakis, Nick  
Vulpescu, Gael Westby, Paul Zappile, Yutong Zhang  
EPI\_ISL\_430404 hCoV-19/USA/NY-NYUMC377/2020 North America / USA / New York / Brooklyn 2020-04-10  
NYU Langone Health Departments of Pathology and Medicine, New York University School of Medicine Maria  
Aguero-Rosenfeld, Brendan Belovarac, Margaret Black, Ludovic Boytard, John Cadley, Paolo Cotzia, John Chen,  
Dacia Dimartino, Xiaojun Feng, Tatyana Gindin, Emily Guzman, Adriana Heguy, Megan Hogan, Emily Huang, George  
Jour, Lawrence H. Lin, Raven Luther, Andrew Lytle, Christian Marier, Matthew T. Maurano, Mark J. Mulligan,  
Peter Meyn, Raquel Ordonez Ciriza, Iman Osman, Jared Pinnell, Vanessa Raabe, Sitharam Ramaswami, Amy  
Rapkiewicz, Andre M. Ribeiro-dos-Santos, Marie Samanovic-Golden, Antonio Serrano, Guomiao Shen, Matija Snuderl,  
Theodore Vougiouklakis, Nick Vulpescu, Gael Westby, Paul Zappile, Yutong Zhang  
EPI\_ISL\_430405 hCoV-19/USA/NJ-NYUMC378/2020 North America / USA / New Jersey / Hudson County 2020-  
04-10 NYU Langone Health Departments of Pathology and Medicine, New York University School of Medicine  
Maria Aguero-Rosenfeld, Brendan Belovarac, Margaret Black, Ludovic Boytard, John Cadley, Paolo Cotzia, John  
Chen, Dacia Dimartino, Xiaojun Feng, Tatyana Gindin, Emily Guzman, Adriana Heguy, Megan Hogan, Emily Huang,  
George Jour, Lawrence H. Lin, Raven Luther, Andrew Lytle, Christian Marier, Matthew T. Maurano, Mark J.  
Mulligan, Peter Meyn, Raquel Ordonez Ciriza, Iman Osman, Jared Pinnell, Vanessa Raabe, Sitharam Ramaswami, Amy  
Rapkiewicz, Andre M. Ribeiro-dos-Santos, Marie Samanovic-Golden, Antonio Serrano, Guomiao Shen, Matija Snuderl,  
Theodore Vougiouklakis, Nick Vulpescu, Gael Westby, Paul Zappile, Yutong Zhang  
EPI\_ISL\_430406 hCoV-19/USA/NY-NYUMC379/2020 North America / USA / New York / Manhattan 2020-04-10  
NYU Langone Health Departments of Pathology and Medicine, New York University School of Medicine Maria  
Aguero-Rosenfeld, Brendan Belovarac, Margaret Black, Ludovic Boytard, John Cadley, Paolo Cotzia, John Chen,  
Dacia Dimartino, Xiaojun Feng, Tatyana Gindin, Emily Guzman, Adriana Heguy, Megan Hogan, Emily Huang, George  
Jour, Lawrence H. Lin, Raven Luther, Andrew Lytle, Christian Marier, Matthew T. Maurano, Mark J. Mulligan,  
Peter Meyn, Raquel Ordonez Ciriza, Iman Osman, Jared Pinnell, Vanessa Raabe, Sitharam Ramaswami, Amy  
Rapkiewicz, Andre M. Ribeiro-dos-Santos, Marie Samanovic-Golden, Antonio Serrano, Guomiao Shen, Matija Snuderl,  
Theodore Vougiouklakis, Nick Vulpescu, Gael Westby, Paul Zappile, Yutong Zhang  
EPI\_ISL\_430407 hCoV-19/USA/NY-NYUMC380/2020 North America / USA / New York / Brooklyn 2020-04-10  
NYU Langone Health Departments of Pathology and Medicine, New York University School of Medicine Maria  
Aguero-Rosenfeld, Brendan Belovarac, Margaret Black, Ludovic Boytard, John Cadley, Paolo Cotzia, John Chen,  
Dacia Dimartino, Xiaojun Feng, Tatyana Gindin, Emily Guzman, Adriana Heguy, Megan Hogan, Emily Huang, George  
Jour, Lawrence H. Lin, Raven Luther, Andrew Lytle, Christian Marier, Matthew T. Maurano, Mark J. Mulligan,

Peter Meyn, Raquel Ordonez Ciriza, Iman Osman, Jared Pinnell, Vanessa Raabe, Sitharam Ramaswami, Amy Rapkiewicz, Andre M. Ribeiro-dos-Santos, Marie Samanovic-Golden, Antonio Serrano, Guomiao Shen, Matija Snuderl, Theodore Vougiouklakis, Nick Vulpescu, Gael Westby, Paul Zappile, Yutong Zhang  
EPI\_ISL\_430408 hCoV-19/USA/NY-NYUMC381/2020 North America / USA / New York / Nassau County 2020-04-09  
NYU Langone Health Departments of Pathology and Medicine, New York University School of Medicine Maria Aguerro-Rosenfeld, Brendan Belovarac, Margaret Black, Ludovic Boytard, John Cadley, Paolo Cotzia, John Chen, Dacia Dimartino, Xiaojun Feng, Tatyana Gindin, Emily Guzman, Adriana Heguy, Megan Hogan, Emily Huang, George Jour, Lawrence H. Lin, Raven Luther, Andrew Lytle, Christian Marier, Matthew T. Maurano, Mark J. Mulligan, Peter Meyn, Raquel Ordonez Ciriza, Iman Osman, Jared Pinnell, Vanessa Raabe, Sitharam Ramaswami, Amy Rapkiewicz, Andre M. Ribeiro-dos-Santos, Marie Samanovic-Golden, Antonio Serrano, Guomiao Shen, Matija Snuderl, Theodore Vougiouklakis, Nick Vulpescu, Gael Westby, Paul Zappile, Yutong Zhang  
EPI\_ISL\_430409 hCoV-19/USA/NY-NYUMC382/2020 North America / USA / New York / Brooklyn 2020-04-10  
NYU Langone Health Departments of Pathology and Medicine, New York University School of Medicine Maria Aguerro-Rosenfeld, Brendan Belovarac, Margaret Black, Ludovic Boytard, John Cadley, Paolo Cotzia, John Chen, Dacia Dimartino, Xiaojun Feng, Tatyana Gindin, Emily Guzman, Adriana Heguy, Megan Hogan, Emily Huang, George Jour, Lawrence H. Lin, Raven Luther, Andrew Lytle, Christian Marier, Matthew T. Maurano, Mark J. Mulligan, Peter Meyn, Raquel Ordonez Ciriza, Iman Osman, Jared Pinnell, Vanessa Raabe, Sitharam Ramaswami, Amy Rapkiewicz, Andre M. Ribeiro-dos-Santos, Marie Samanovic-Golden, Antonio Serrano, Guomiao Shen, Matija Snuderl, Theodore Vougiouklakis, Nick Vulpescu, Gael Westby, Paul Zappile, Yutong Zhang  
EPI\_ISL\_430410 hCoV-19/USA/NY-NYUMC383/2020 North America / USA / New York / Brooklyn 2020-04-10  
NYU Langone Health Departments of Pathology and Medicine, New York University School of Medicine Maria Aguerro-Rosenfeld, Brendan Belovarac, Margaret Black, Ludovic Boytard, John Cadley, Paolo Cotzia, John Chen, Dacia Dimartino, Xiaojun Feng, Tatyana Gindin, Emily Guzman, Adriana Heguy, Megan Hogan, Emily Huang, George Jour, Lawrence H. Lin, Raven Luther, Andrew Lytle, Christian Marier, Matthew T. Maurano, Mark J. Mulligan, Peter Meyn, Raquel Ordonez Ciriza, Iman Osman, Jared Pinnell, Vanessa Raabe, Sitharam Ramaswami, Amy Rapkiewicz, Andre M. Ribeiro-dos-Santos, Marie Samanovic-Golden, Antonio Serrano, Guomiao Shen, Matija Snuderl, Theodore Vougiouklakis, Nick Vulpescu, Gael Westby, Paul Zappile, Yutong Zhang  
EPI\_ISL\_430411 hCoV-19/USA/NY-NYUMC384/2020 North America / USA / New York / Brooklyn 2020-04-09  
NYU Langone Health Departments of Pathology and Medicine, New York University School of Medicine Maria Aguerro-Rosenfeld, Brendan Belovarac, Margaret Black, Ludovic Boytard, John Cadley, Paolo Cotzia, John Chen, Dacia Dimartino, Xiaojun Feng, Tatyana Gindin, Emily Guzman, Adriana Heguy, Megan Hogan, Emily Huang, George Jour, Lawrence H. Lin, Raven Luther, Andrew Lytle, Christian Marier, Matthew T. Maurano, Mark J. Mulligan, Peter Meyn, Raquel Ordonez Ciriza, Iman Osman, Jared Pinnell, Vanessa Raabe, Sitharam Ramaswami, Amy Rapkiewicz, Andre M. Ribeiro-dos-Santos, Marie Samanovic-Golden, Antonio Serrano, Guomiao Shen, Matija Snuderl, Theodore Vougiouklakis, Nick Vulpescu, Gael Westby, Paul Zappile, Yutong Zhang  
EPI\_ISL\_430412 hCoV-19/USA/NY-NYUMC385/2020 North America / USA / New York / Staten Island 2020-04-10  
NYU Langone Health Departments of Pathology and Medicine, New York University School of Medicine Maria Aguerro-Rosenfeld, Brendan Belovarac, Margaret Black, Ludovic Boytard, John Cadley, Paolo Cotzia, John Chen, Dacia Dimartino, Xiaojun Feng, Tatyana Gindin, Emily Guzman, Adriana Heguy, Megan Hogan, Emily Huang, George Jour, Lawrence H. Lin, Raven Luther, Andrew Lytle, Christian Marier, Matthew T. Maurano, Mark J. Mulligan, Peter Meyn, Raquel Ordonez Ciriza, Iman Osman, Jared Pinnell, Vanessa Raabe, Sitharam Ramaswami, Amy Rapkiewicz, Andre M. Ribeiro-dos-Santos, Marie Samanovic-Golden, Antonio Serrano, Guomiao Shen, Matija Snuderl, Theodore Vougiouklakis, Nick Vulpescu, Gael Westby, Paul Zappile, Yutong Zhang  
EPI\_ISL\_430413 hCoV-19/USA/NY-NYUMC386/2020 North America / USA / New York / Nassau County 2020-04-09  
NYU Langone Health Departments of Pathology and Medicine, New York University School of Medicine Maria Aguerro-Rosenfeld, Brendan Belovarac, Margaret Black, Ludovic Boytard, John Cadley, Paolo Cotzia, John Chen, Dacia Dimartino, Xiaojun Feng, Tatyana Gindin, Emily Guzman, Adriana Heguy, Megan Hogan, Emily Huang, George Jour, Lawrence H. Lin, Raven Luther, Andrew Lytle, Christian Marier, Matthew T. Maurano, Mark J. Mulligan, Peter Meyn, Raquel Ordonez Ciriza, Iman Osman, Jared Pinnell, Vanessa Raabe, Sitharam Ramaswami, Amy Rapkiewicz, Andre M. Ribeiro-dos-Santos, Marie Samanovic-Golden, Antonio Serrano, Guomiao Shen, Matija Snuderl, Theodore Vougiouklakis, Nick Vulpescu, Gael Westby, Paul Zappile, Yutong Zhang  
EPI\_ISL\_430414 hCoV-19/USA/NY-NYUMC387/2020 North America / USA / New York / Rockland County 2020-04-10  
NYU Langone Health Departments of Pathology and Medicine, New York University School of Medicine Maria Aguerro-Rosenfeld, Brendan Belovarac, Margaret Black, Ludovic Boytard, John Cadley, Paolo Cotzia, John Chen, Dacia Dimartino, Xiaojun Feng, Tatyana Gindin, Emily Guzman, Adriana Heguy, Megan Hogan, Emily Huang, George Jour, Lawrence H. Lin, Raven Luther, Andrew Lytle, Christian Marier, Matthew T. Maurano, Mark J. Mulligan, Peter Meyn, Raquel Ordonez Ciriza, Iman Osman, Jared Pinnell, Vanessa Raabe, Sitharam Ramaswami, Amy Rapkiewicz, Andre M. Ribeiro-dos-Santos, Marie Samanovic-Golden, Antonio Serrano, Guomiao Shen, Matija Snuderl, Theodore Vougiouklakis, Nick Vulpescu, Gael Westby, Paul Zappile, Yutong Zhang  
EPI\_ISL\_430415 hCoV-19/USA/NY-NYUMC388/2020 North America / USA / New York / Manhattan 2020-04-10  
NYU Langone Health Departments of Pathology and Medicine, New York University School of Medicine Maria Aguerro-Rosenfeld, Brendan Belovarac, Margaret Black, Ludovic Boytard, John Cadley, Paolo Cotzia, John Chen, Dacia Dimartino, Xiaojun Feng, Tatyana Gindin, Emily Guzman, Adriana Heguy, Megan Hogan, Emily Huang, George Jour, Lawrence H. Lin, Raven Luther, Andrew Lytle, Christian Marier, Matthew T. Maurano, Mark J. Mulligan, Peter Meyn, Raquel Ordonez Ciriza, Iman Osman, Jared Pinnell, Vanessa Raabe, Sitharam Ramaswami, Amy Rapkiewicz, Andre M. Ribeiro-dos-Santos, Marie Samanovic-Golden, Antonio Serrano, Guomiao Shen, Matija Snuderl, Theodore Vougiouklakis, Nick Vulpescu, Gael Westby, Paul Zappile, Yutong Zhang  
EPI\_ISL\_430416 hCoV-19/USA/NY-NYUMC389/2020 North America / USA / New York / Manhattan 2020-04-13  
NYU Langone Health Departments of Pathology and Medicine, New York University School of Medicine Maria Aguerro-Rosenfeld, Brendan Belovarac, Margaret Black, Ludovic Boytard, John Cadley, Paolo Cotzia, John Chen,

Dacia Dimartino, Xiaojun Feng, Tatyana Gindin, Emily Guzman, Adriana Heguy, Megan Hogan, Emily Huang, George Jour, Lawrence H. Lin, Raven Luther, Andrew Lytle, Christian Marier, Matthew T. Maurano, Mark J. Mulligan, Peter Meyn, Raquel Ordonez Ciriza, Iman Osman, Jared Pinnell, Vanessa Raabe, Sitharam Ramaswami, Amy Rapkiewicz, Andre M. Ribeiro-dos-Santos, Marie Samanovic-Golden, Antonio Serrano, Guomiao Shen, Matija Snuderl, Theodore Vougiouklakis, Nick Vulpescu, Gael Westby, Paul Zappile, Yutong Zhang  
EPI\_ISL\_430417 hCoV-19/USA/NY-NYUMC390/2020 North America / USA / New York / Nassau County 2020-04-13  
NYU Langone Health Departments of Pathology and Medicine, New York University School of Medicine Maria Aguerro-Rosenfeld, Brendan Belovarac, Margaret Black, Ludovic Boytard, John Cadley, Paolo Cotzia, John Chen, Dacia Dimartino, Xiaojun Feng, Tatyana Gindin, Emily Guzman, Adriana Heguy, Megan Hogan, Emily Huang, George Jour, Lawrence H. Lin, Raven Luther, Andrew Lytle, Christian Marier, Matthew T. Maurano, Mark J. Mulligan, Peter Meyn, Raquel Ordonez Ciriza, Iman Osman, Jared Pinnell, Vanessa Raabe, Sitharam Ramaswami, Amy Rapkiewicz, Andre M. Ribeiro-dos-Santos, Marie Samanovic-Golden, Antonio Serrano, Guomiao Shen, Matija Snuderl, Theodore Vougiouklakis, Nick Vulpescu, Gael Westby, Paul Zappile, Yutong Zhang  
EPI\_ISL\_430418 hCoV-19/USA/NY-NYUMC391/2020 North America / USA / New York / Nassau County 2020-04-13  
NYU Langone Health Departments of Pathology and Medicine, New York University School of Medicine Maria Aguerro-Rosenfeld, Brendan Belovarac, Margaret Black, Ludovic Boytard, John Cadley, Paolo Cotzia, John Chen, Dacia Dimartino, Xiaojun Feng, Tatyana Gindin, Emily Guzman, Adriana Heguy, Megan Hogan, Emily Huang, George Jour, Lawrence H. Lin, Raven Luther, Andrew Lytle, Christian Marier, Matthew T. Maurano, Mark J. Mulligan, Peter Meyn, Raquel Ordonez Ciriza, Iman Osman, Jared Pinnell, Vanessa Raabe, Sitharam Ramaswami, Amy Rapkiewicz, Andre M. Ribeiro-dos-Santos, Marie Samanovic-Golden, Antonio Serrano, Guomiao Shen, Matija Snuderl, Theodore Vougiouklakis, Nick Vulpescu, Gael Westby, Paul Zappile, Yutong Zhang  
EPI\_ISL\_430419 hCoV-19/USA/NY-NYUMC392/2020 North America / USA / New York / Nassau County 2020-04-13  
NYU Langone Health Departments of Pathology and Medicine, New York University School of Medicine Maria Aguerro-Rosenfeld, Brendan Belovarac, Margaret Black, Ludovic Boytard, John Cadley, Paolo Cotzia, John Chen, Dacia Dimartino, Xiaojun Feng, Tatyana Gindin, Emily Guzman, Adriana Heguy, Megan Hogan, Emily Huang, George Jour, Lawrence H. Lin, Raven Luther, Andrew Lytle, Christian Marier, Matthew T. Maurano, Mark J. Mulligan, Peter Meyn, Raquel Ordonez Ciriza, Iman Osman, Jared Pinnell, Vanessa Raabe, Sitharam Ramaswami, Amy Rapkiewicz, Andre M. Ribeiro-dos-Santos, Marie Samanovic-Golden, Antonio Serrano, Guomiao Shen, Matija Snuderl, Theodore Vougiouklakis, Nick Vulpescu, Gael Westby, Paul Zappile, Yutong Zhang  
EPI\_ISL\_430420 hCoV-19/USA/NY-NYUMC393/2020 North America / USA / New York / Staten Island 2020-04-13  
NYU Langone Health Departments of Pathology and Medicine, New York University School of Medicine Maria Aguerro-Rosenfeld, Brendan Belovarac, Margaret Black, Ludovic Boytard, John Cadley, Paolo Cotzia, John Chen, Dacia Dimartino, Xiaojun Feng, Tatyana Gindin, Emily Guzman, Adriana Heguy, Megan Hogan, Emily Huang, George Jour, Lawrence H. Lin, Raven Luther, Andrew Lytle, Christian Marier, Matthew T. Maurano, Mark J. Mulligan, Peter Meyn, Raquel Ordonez Ciriza, Iman Osman, Jared Pinnell, Vanessa Raabe, Sitharam Ramaswami, Amy Rapkiewicz, Andre M. Ribeiro-dos-Santos, Marie Samanovic-Golden, Antonio Serrano, Guomiao Shen, Matija Snuderl, Theodore Vougiouklakis, Nick Vulpescu, Gael Westby, Paul Zappile, Yutong Zhang  
EPI\_ISL\_430421 hCoV-19/USA/NY-NYUMC394/2020 North America / USA / New York / Brooklyn 2020-04-13  
NYU Langone Health Departments of Pathology and Medicine, New York University School of Medicine Maria Aguerro-Rosenfeld, Brendan Belovarac, Margaret Black, Ludovic Boytard, John Cadley, Paolo Cotzia, John Chen, Dacia Dimartino, Xiaojun Feng, Tatyana Gindin, Emily Guzman, Adriana Heguy, Megan Hogan, Emily Huang, George Jour, Lawrence H. Lin, Raven Luther, Andrew Lytle, Christian Marier, Matthew T. Maurano, Mark J. Mulligan, Peter Meyn, Raquel Ordonez Ciriza, Iman Osman, Jared Pinnell, Vanessa Raabe, Sitharam Ramaswami, Amy Rapkiewicz, Andre M. Ribeiro-dos-Santos, Marie Samanovic-Golden, Antonio Serrano, Guomiao Shen, Matija Snuderl, Theodore Vougiouklakis, Nick Vulpescu, Gael Westby, Paul Zappile, Yutong Zhang  
EPI\_ISL\_430422 hCoV-19/USA/NY-NYUMC395/2020 North America / USA / New York / Queens 2020-04-13 NYU  
Langone Health Departments of Pathology and Medicine, New York University School of Medicine Maria Aguerro-Rosenfeld, Brendan Belovarac, Margaret Black, Ludovic Boytard, John Cadley, Paolo Cotzia, John Chen, Dacia Dimartino, Xiaojun Feng, Tatyana Gindin, Emily Guzman, Adriana Heguy, Megan Hogan, Emily Huang, George Jour, Lawrence H. Lin, Raven Luther, Andrew Lytle, Christian Marier, Matthew T. Maurano, Mark J. Mulligan, Peter Meyn, Raquel Ordonez Ciriza, Iman Osman, Jared Pinnell, Vanessa Raabe, Sitharam Ramaswami, Amy Rapkiewicz, Andre M. Ribeiro-dos-Santos, Marie Samanovic-Golden, Antonio Serrano, Guomiao Shen, Matija Snuderl, Theodore Vougiouklakis, Nick Vulpescu, Gael Westby, Paul Zappile, Yutong Zhang  
EPI\_ISL\_430423 hCoV-19/USA/NY-NYUMC396/2020 North America / USA / New York / Queens 2020-04-11 NYU  
Langone Health Departments of Pathology and Medicine, New York University School of Medicine Maria Aguerro-Rosenfeld, Brendan Belovarac, Margaret Black, Ludovic Boytard, John Cadley, Paolo Cotzia, John Chen, Dacia Dimartino, Xiaojun Feng, Tatyana Gindin, Emily Guzman, Adriana Heguy, Megan Hogan, Emily Huang, George Jour, Lawrence H. Lin, Raven Luther, Andrew Lytle, Christian Marier, Matthew T. Maurano, Mark J. Mulligan, Peter Meyn, Raquel Ordonez Ciriza, Iman Osman, Jared Pinnell, Vanessa Raabe, Sitharam Ramaswami, Amy Rapkiewicz, Andre M. Ribeiro-dos-Santos, Marie Samanovic-Golden, Antonio Serrano, Guomiao Shen, Matija Snuderl, Theodore Vougiouklakis, Nick Vulpescu, Gael Westby, Paul Zappile, Yutong Zhang  
EPI\_ISL\_430424 hCoV-19/USA/NY-NYUMC397/2020 North America / USA / New York / Brooklyn 2020-04-13  
NYU Langone Health Departments of Pathology and Medicine, New York University School of Medicine Maria Aguerro-Rosenfeld, Brendan Belovarac, Margaret Black, Ludovic Boytard, John Cadley, Paolo Cotzia, John Chen, Dacia Dimartino, Xiaojun Feng, Tatyana Gindin, Emily Guzman, Adriana Heguy, Megan Hogan, Emily Huang, George Jour, Lawrence H. Lin, Raven Luther, Andrew Lytle, Christian Marier, Matthew T. Maurano, Mark J. Mulligan, Peter Meyn, Raquel Ordonez Ciriza, Iman Osman, Jared Pinnell, Vanessa Raabe, Sitharam Ramaswami, Amy Rapkiewicz, Andre M. Ribeiro-dos-Santos, Marie Samanovic-Golden, Antonio Serrano, Guomiao Shen, Matija Snuderl, Theodore Vougiouklakis, Nick Vulpescu, Gael Westby, Paul Zappile, Yutong Zhang  
EPI\_ISL\_430425 hCoV-19/USA/NY-NYUMC398/2020 North America / USA / New York / Manhattan 2020-04-13



NYU Langone Health Departments of Pathology and Medicine, New York University School of Medicine Maria Aguerro-Rosenfeld, Brendan Belovarac, Margaret Black, Ludovic Boytard, John Cadley, Paolo Cotzia, John Chen, Dacia Dimartino, Xiaojun Feng, Tatyana Gindin, Emily Guzman, Adriana Heguy, Megan Hogan, Emily Huang, George Jour, Lawrence H. Lin, Raven Luther, Andrew Lytle, Christian Marier, Matthew T. Maurano, Mark J. Mulligan, Peter Meyn, Raquel Ordonez Ciriza, Iman Osman, Jared Pinnell, Vanessa Raabe, Sitharam Ramaswami, Amy Rapkiewicz, Andre M. Ribeiro-dos-Santos, Marie Samanovic-Golden, Antonio Serrano, Guomiao Shen, Matija Snuderl, Theodore Vougiouklakis, Nick Vulpescu, Gael Westby, Paul Zappile, Yutong Zhang  
EPI\_ISL\_430426 hCoV-19/USA/NY-NYUMC399/2020 North America / USA / New York / Manhattan 2020-04-13  
NYU Langone Health Departments of Pathology and Medicine, New York University School of Medicine Maria Aguerro-Rosenfeld, Brendan Belovarac, Margaret Black, Ludovic Boytard, John Cadley, Paolo Cotzia, John Chen, Dacia Dimartino, Xiaojun Feng, Tatyana Gindin, Emily Guzman, Adriana Heguy, Megan Hogan, Emily Huang, George Jour, Lawrence H. Lin, Raven Luther, Andrew Lytle, Christian Marier, Matthew T. Maurano, Mark J. Mulligan, Peter Meyn, Raquel Ordonez Ciriza, Iman Osman, Jared Pinnell, Vanessa Raabe, Sitharam Ramaswami, Amy Rapkiewicz, Andre M. Ribeiro-dos-Santos, Marie Samanovic-Golden, Antonio Serrano, Guomiao Shen, Matija Snuderl, Theodore Vougiouklakis, Nick Vulpescu, Gael Westby, Paul Zappile, Yutong Zhang  
EPI\_ISL\_430427 hCoV-19/USA/NY-NYUMC400/2020 North America / USA / New York / Nassau County 2020-04-13  
NYU Langone Health Departments of Pathology and Medicine, New York University School of Medicine Maria Aguerro-Rosenfeld, Brendan Belovarac, Margaret Black, Ludovic Boytard, John Cadley, Paolo Cotzia, John Chen, Dacia Dimartino, Xiaojun Feng, Tatyana Gindin, Emily Guzman, Adriana Heguy, Megan Hogan, Emily Huang, George Jour, Lawrence H. Lin, Raven Luther, Andrew Lytle, Christian Marier, Matthew T. Maurano, Mark J. Mulligan, Peter Meyn, Raquel Ordonez Ciriza, Iman Osman, Jared Pinnell, Vanessa Raabe, Sitharam Ramaswami, Amy Rapkiewicz, Andre M. Ribeiro-dos-Santos, Marie Samanovic-Golden, Antonio Serrano, Guomiao Shen, Matija Snuderl, Theodore Vougiouklakis, Nick Vulpescu, Gael Westby, Paul Zappile, Yutong Zhang  
EPI\_ISL\_430428 hCoV-19/USA/NJ-NYUMC401/2020 North America / USA / New Jersey / Hudson County 2020-04-13  
NYU Langone Health Departments of Pathology and Medicine, New York University School of Medicine Maria Aguerro-Rosenfeld, Brendan Belovarac, Margaret Black, Ludovic Boytard, John Cadley, Paolo Cotzia, John Chen, Dacia Dimartino, Xiaojun Feng, Tatyana Gindin, Emily Guzman, Adriana Heguy, Megan Hogan, Emily Huang, George Jour, Lawrence H. Lin, Raven Luther, Andrew Lytle, Christian Marier, Matthew T. Maurano, Mark J. Mulligan, Peter Meyn, Raquel Ordonez Ciriza, Iman Osman, Jared Pinnell, Vanessa Raabe, Sitharam Ramaswami, Amy Rapkiewicz, Andre M. Ribeiro-dos-Santos, Marie Samanovic-Golden, Antonio Serrano, Guomiao Shen, Matija Snuderl, Theodore Vougiouklakis, Nick Vulpescu, Gael Westby, Paul Zappile, Yutong Zhang  
EPI\_ISL\_430429 hCoV-19/USA/NY-NYUMC402/2020 North America / USA / New York / Brooklyn 2020-04-13  
NYU Langone Health Departments of Pathology and Medicine, New York University School of Medicine Maria Aguerro-Rosenfeld, Brendan Belovarac, Margaret Black, Ludovic Boytard, John Cadley, Paolo Cotzia, John Chen, Dacia Dimartino, Xiaojun Feng, Tatyana Gindin, Emily Guzman, Adriana Heguy, Megan Hogan, Emily Huang, George Jour, Lawrence H. Lin, Raven Luther, Andrew Lytle, Christian Marier, Matthew T. Maurano, Mark J. Mulligan, Peter Meyn, Raquel Ordonez Ciriza, Iman Osman, Jared Pinnell, Vanessa Raabe, Sitharam Ramaswami, Amy Rapkiewicz, Andre M. Ribeiro-dos-Santos, Marie Samanovic-Golden, Antonio Serrano, Guomiao Shen, Matija Snuderl, Theodore Vougiouklakis, Nick Vulpescu, Gael Westby, Paul Zappile, Yutong Zhang  
EPI\_ISL\_430430 hCoV-19/USA/NY-NYUMC403/2020 North America / USA / New York / Bronx 2020-04-13  
NYU Langone Health Departments of Pathology and Medicine, New York University School of Medicine Maria Aguerro-Rosenfeld, Brendan Belovarac, Margaret Black, Ludovic Boytard, John Cadley, Paolo Cotzia, John Chen, Dacia Dimartino, Xiaojun Feng, Tatyana Gindin, Emily Guzman, Adriana Heguy, Megan Hogan, Emily Huang, George Jour, Lawrence H. Lin, Raven Luther, Andrew Lytle, Christian Marier, Matthew T. Maurano, Mark J. Mulligan, Peter Meyn, Raquel Ordonez Ciriza, Iman Osman, Jared Pinnell, Vanessa Raabe, Sitharam Ramaswami, Amy Rapkiewicz, Andre M. Ribeiro-dos-Santos, Marie Samanovic-Golden, Antonio Serrano, Guomiao Shen, Matija Snuderl, Theodore Vougiouklakis, Nick Vulpescu, Gael Westby, Paul Zappile, Yutong Zhang  
EPI\_ISL\_430431 hCoV-19/USA/NY-NYUMC404/2020 North America / USA / New York / Nassau County 2020-04-13  
NYU Langone Health Departments of Pathology and Medicine, New York University School of Medicine Maria Aguerro-Rosenfeld, Brendan Belovarac, Margaret Black, Ludovic Boytard, John Cadley, Paolo Cotzia, John Chen, Dacia Dimartino, Xiaojun Feng, Tatyana Gindin, Emily Guzman, Adriana Heguy, Megan Hogan, Emily Huang, George Jour, Lawrence H. Lin, Raven Luther, Andrew Lytle, Christian Marier, Matthew T. Maurano, Mark J. Mulligan, Peter Meyn, Raquel Ordonez Ciriza, Iman Osman, Jared Pinnell, Vanessa Raabe, Sitharam Ramaswami, Amy Rapkiewicz, Andre M. Ribeiro-dos-Santos, Marie Samanovic-Golden, Antonio Serrano, Guomiao Shen, Matija Snuderl, Theodore Vougiouklakis, Nick Vulpescu, Gael Westby, Paul Zappile, Yutong Zhang  
EPI\_ISL\_430432 hCoV-19/USA/NY-NYUMC405/2020 North America / USA / New York / Staten Island 2020-04-13  
NYU Langone Health Departments of Pathology and Medicine, New York University School of Medicine Maria Aguerro-Rosenfeld, Brendan Belovarac, Margaret Black, Ludovic Boytard, John Cadley, Paolo Cotzia, John Chen, Dacia Dimartino, Xiaojun Feng, Tatyana Gindin, Emily Guzman, Adriana Heguy, Megan Hogan, Emily Huang, George Jour, Lawrence H. Lin, Raven Luther, Andrew Lytle, Christian Marier, Matthew T. Maurano, Mark J. Mulligan, Peter Meyn, Raquel Ordonez Ciriza, Iman Osman, Jared Pinnell, Vanessa Raabe, Sitharam Ramaswami, Amy Rapkiewicz, Andre M. Ribeiro-dos-Santos, Marie Samanovic-Golden, Antonio Serrano, Guomiao Shen, Matija Snuderl, Theodore Vougiouklakis, Nick Vulpescu, Gael Westby, Paul Zappile, Yutong Zhang  
EPI\_ISL\_430433 hCoV-19/USA/NY-NYUMC406/2020 North America / USA / New York / Queens 2020-04-13  
NYU Langone Health Departments of Pathology and Medicine, New York University School of Medicine Maria Aguerro-Rosenfeld, Brendan Belovarac, Margaret Black, Ludovic Boytard, John Cadley, Paolo Cotzia, John Chen, Dacia Dimartino, Xiaojun Feng, Tatyana Gindin, Emily Guzman, Adriana Heguy, Megan Hogan, Emily Huang, George Jour, Lawrence H. Lin, Raven Luther, Andrew Lytle, Christian Marier, Matthew T. Maurano, Mark J. Mulligan, Peter Meyn, Raquel Ordonez Ciriza, Iman Osman, Jared Pinnell, Vanessa Raabe, Sitharam Ramaswami, Amy Rapkiewicz, Andre M. Ribeiro-dos-Santos, Marie Samanovic-Golden, Antonio Serrano, Guomiao Shen, Matija Snuderl, Theodore

Vougiouklakis, Nick Vulpescu, Gael Westby, Paul Zappile, Yutong Zhang  
EPI\_ISL\_430434 hCoV-19/USA/NY-NYUMC407/2020 North America / USA / New York / Queens 2020-04-12 NYU  
Langone Health Departments of Pathology and Medicine, New York University School of Medicine Maria Agueró-Rosenfeld, Brendan Belovarac, Margaret Black, Ludovic Boytard, John Cadley, Paolo Cotzia, John Chen, Dacia Dimartino, Xiaojun Feng, Tatyana Gindin, Emily Guzman, Adriana Heguy, Megan Hogan, Emily Huang, George Jour, Lawrence H. Lin, Raven Luther, Andrew Lytle, Christian Marier, Matthew T. Maurano, Mark J. Mulligan, Peter Meyn, Raquel Ordonez Ciriza, Iman Osman, Jared Pinnell, Vanessa Raabe, Sitharam Ramaswami, Amy Rapkiewicz, Andre M. Ribeiro-dos-Santos, Marie Samanovic-Golden, Antonio Serrano, Guomiao Shen, Matija Snuderl, Theodore Vougiouklakis, Nick Vulpescu, Gael Westby, Paul Zappile, Yutong Zhang

EPI\_ISL\_430439 hCoV-19/Malaysia/IMR\_WC1177/2020 Asia / Malaysia 2020-03-05 Institute for Medical Research, Infectious Disease Research Centre, National Institutes of Health, Ministry of Health Malaysia  
Institute for Medical Research Infectious Disease Research Centre, National Institutes of Health, Ministry of Health Malaysia Suppiah.J, Mohd-Zawawi.Z, Kalyanasundram.J, Azizan.M-A, Mat-Sharani.S, Hisham.H-A, Tan.L-P, Abdul-Wahid.M-Z, Mohd-Zain.R, Ahmad.N, Thayan.R

EPI\_ISL\_430440 hCoV-19/Malaysia/IMR\_WC1170/2020 Asia / Malaysia 2020-03-05 Institute for Medical Research, Infectious Disease Research Centre, National Institutes of Health, Ministry of Health Malaysia  
Institute for Medical Research, Infectious Disease Research Centre, National Institutes of Health, Ministry of Health Malaysia Suppiah.J, Mohd-Zawawi.Z, Kalyanasundram.J, Azizan.M-A, Mat-Sharani.S, Hisham.H-A, Tan.L-P, Abdul-Wahid.M-Z, Tengku-Abd-Rashid.T-R, Mohd-Zain.R, Ahmad.N, Thayan.R

EPI\_ISL\_430441 hCoV-19/Malaysia/IMR\_WC1097/2020 Asia / Malaysia 2020-02-29 Institute for Medical Research, Infectious Disease Research Centre, National Institutes of Health, Ministry of Health Malaysia  
Institute for Medical Research, Infectious Disease Research Centre, National Institutes of Health, Ministry of Health Malaysia Suppiah.J, Mohd-Zawawi.Z, Kalyanasundram.J, Azizan.M-A, Mat-Sharani.S, Hisham.H-A, Tan.L-P, Abdul-Wahid.M-Z, Tengku-Rogayah.TAR, Mohd-Zain.R, Ahmad.N, Thayan.R

EPI\_ISL\_430442 hCoV-19/Malaysia/IMR\_WC1098/2020 Asia / Malaysia 2020-02-29 Institute for Medical Research, Infectious Disease Research Centre, National Institutes of Health, Ministry of Health Malaysia  
Institute for Medical Research, Infectious Disease Research Centre, National Institutes of Health, Ministry of Health Malaysia Suppiah.J, Mohd-Zawawi.Z, Kalyanasundram.J, Azizan.M-A, Mat-Sharani.S, Hisham.H-A, Tan.L-P, Abdul-Wahid.M-Z, Tengku-Rogayah.TAR, Mohd-Zain.R, Ahmad.N, Thayan.R

EPI\_ISL\_430443 hCoV-19/Malaysia/IMR\_WC085/2020 Asia / Malaysia 2020-01-28 Institute for Medical Research, Infectious Disease Research Centre, National Institutes of Health, Ministry of Health Malaysia  
Institute for Medical Research, Infectious Disease Research Centre, National Institutes of Health, Ministry of Health Malaysia Suppiah.J, Mohd-Zawawi.Z, Kalyanasundram.J, Azizan.M-A, Mat-Sharani.S, Hisham.H-A, Tan.L-P, Abdul-Wahid.M-Z, Tengku-Rogayah.TAR, Mohd-Zain.R, Ahmad.N, Thayan.R

EPI\_ISL\_430444 hCoV-19/Malaysia/IMR\_WC627/2020 Asia / Malaysia 2020-02-12 Institute for Medical Research, Infectious Disease Research Centre, National Institutes of Health, Ministry of Health Malaysia  
Institute for Medical Research, Infectious Disease Research Centre, National Institutes of Health, Ministry of Health Malaysia Suppiah.J, Mohd-Zawawi.Z, Kalyanasundram.J, Azizan.M-A, Mat-Sharani.S, Hisham.H-A, Tan.L-P, Abdul-Wahid.M-Z, Tengku-Rogayah.TAR, Mohd-Zain.R, Ahmad.N, Thayan.R

EPI\_ISL\_430464 hCoV-19/India/S3/2020 Asia / India / West Bengal / Kolkata 2020-03-21 ICMR-National Institute of Cholera and Enteric Diseases  
National Institute of Biomedical Genomics Arindam Maitra, Mamta Chawla Sarkar, Sreedhar Chinnaswamy, Hasina Banu, Ananya Chatterjee, Shanta Dutta, Saumitra Das

EPI\_ISL\_430465 hCoV-19/India/S5/2020 Asia / India / West Bengal / Darjeeling 2020-03-28 ICMR-National Institute of Cholera and Enteric Diseases  
National Institute of Biomedical Genomics Arindam Maitra, Mamta Chawla Sarkar, Sreedhar Chinnaswamy, Hasina Banu, Ananya Chatterjee, Shanta Dutta, Saumitra Das

EPI\_ISL\_430466 hCoV-19/India/S6/2020 Asia / India / West Bengal / Tehatta 2020-03-26 ICMR-National Institute of Cholera and Enteric Diseases  
National Institute of Biomedical Genomics Arindam Maitra, Mamta Chawla Sarkar, Sreedhar Chinnaswamy, Hasina Banu, Ananya Chatterjee, Shanta Dutta, Saumitra Das

EPI\_ISL\_430467 hCoV-19/India/S11/2020 Asia / India / West Bengal / East Medinipur 2020-04-03 ICMR-National Institute of Cholera and Enteric Diseases  
National Institute of Biomedical Genomics Arindam Maitra, Mamta Chawla Sarkar, Sreedhar Chinnaswamy, Hasina Banu, Ananya Chatterjee, Shanta Dutta, Saumitra Das

EPI\_ISL\_430468 hCoV-19/India/S2/2020 Asia / India / West Bengal / Kolkata 2020-03-21 ICMR-National Institute of Cholera and Enteric Diseases  
National Institute of Biomedical Genomics Arindam Maitra, Mamta Chawla Sarkar, Sreedhar Chinnaswamy, Hasina Banu, Ananya Chatterjee, Shanta Dutta, Saumitra Das

EPI\_ISL\_430469 hCoV-19/Greece/127\_HPI/2020 Europe / Greece / Athens 2020-02-29 Hellenic Pasteur Institute, Public Health Laboratories  
Hellenic Pasteur Institute, Public Health Laboratories, Unit of Bioinformatics and Applied Genomics Vasiliki Pogka, Timokratis Karamitros, Athanasios Kossyvakis, Antonios Kalliaropoulos, Horefti Elina, Evangelidou Maria, Androniki Voulgari-Kokota, Aspasia Kontou, Andreas Mentis

EPI\_ISL\_430471 hCoV-19/Australia/VIC935/2020 Oceania / Australia / Victoria 2020-03-25 Microbiological Diagnostic Unit Public Health Laboratory  
Microbiological Diagnostic Unit Public Health Laboratory Seemann T., Schultz M., Sait, M., Sherry, N.

EPI\_ISL\_430472 hCoV-19/Australia/VIC938/2020 Oceania / Australia / Victoria 2020-03-25 Microbiological Diagnostic Unit Public Health Laboratory  
Microbiological Diagnostic Unit Public Health Laboratory Seemann T., Schultz M., Sait, M., Sherry, N.

EPI\_ISL\_430473 hCoV-19/Australia/VIC1008/2020 Oceania / Australia / Victoria 2020-03-31 Victorian Infectious Diseases Reference Laboratory (VIDRL)  
Microbiological Diagnostic Unit Public Health Laboratory and Victorian Infectious Diseases Reference Laboratory, The Peter Doherty Institute for Infection and Immunity Caly L., Seemann T., Sait, M., Schultz M., Druce J., Sherry, N.

EPI\_ISL\_430476 hCoV-19/Australia/VIC1016/2020 Oceania / Australia / Victoria 2020-04-01 Victorian Infectious Diseases Reference Laboratory (VIDRL)  
Microbiological Diagnostic Unit Public Health Laboratory

|                                                                           |                                                                                                                                                                                                       |                                                                     |            |                                                                         |
|---------------------------------------------------------------------------|-------------------------------------------------------------------------------------------------------------------------------------------------------------------------------------------------------|---------------------------------------------------------------------|------------|-------------------------------------------------------------------------|
| Laboratory and Victorian Infectious Diseases Reference Laboratory (VIDRL) | Caly L., Seemann T., Sait, M., Schultz M., Druce J., Sherry, N.                                                                                                                                       | Oceania / Australia / Victoria                                      | 2020-03-31 | Victorian Public Health                                                 |
| EPI_ISL_430478                                                            | hCoV-19/Australia/VIC994/2020                                                                                                                                                                         | Oceania / Australia / Victoria                                      | 2020-03-31 | Victorian Public Health                                                 |
| Laboratory and Victorian Infectious Diseases Reference Laboratory (VIDRL) | Caly L., Seemann T., Sait, M., Schultz M., Druce J., Sherry, N.                                                                                                                                       | Oceania / Australia / Victoria                                      | 2020-03-31 | Victorian Public Health                                                 |
| EPI_ISL_430479                                                            | hCoV-19/Australia/VIC995/2020                                                                                                                                                                         | Oceania / Australia / Victoria                                      | 2020-03-31 | Victorian Public Health                                                 |
| Laboratory and Victorian Infectious Diseases Reference Laboratory (VIDRL) | Caly L., Seemann T., Sait, M., Schultz M., Druce J., Sherry, N.                                                                                                                                       | Oceania / Australia / Victoria                                      | 2020-03-31 | Victorian Public Health                                                 |
| EPI_ISL_430481                                                            | hCoV-19/Australia/VIC997/2020                                                                                                                                                                         | Oceania / Australia / Victoria                                      | 2020-03-31 | Victorian Public Health                                                 |
| Laboratory and Victorian Infectious Diseases Reference Laboratory (VIDRL) | Caly L., Seemann T., Sait, M., Schultz M., Druce J., Sherry, N.                                                                                                                                       | Oceania / Australia / Victoria                                      | 2020-03-31 | Victorian Public Health                                                 |
| EPI_ISL_430482                                                            | hCoV-19/Australia/VIC998/2020                                                                                                                                                                         | Oceania / Australia / Victoria                                      | 2020-03-31 | Victorian Public Health                                                 |
| Laboratory and Victorian Infectious Diseases Reference Laboratory (VIDRL) | Caly L., Seemann T., Sait, M., Schultz M., Druce J., Sherry, N.                                                                                                                                       | Oceania / Australia / Victoria                                      | 2020-03-31 | Victorian Public Health                                                 |
| EPI_ISL_430484                                                            | hCoV-19/Australia/VIC1000/2020                                                                                                                                                                        | Oceania / Australia / Victoria                                      | 2020-03-31 | Victorian Public Health                                                 |
| Laboratory and Victorian Infectious Diseases Reference Laboratory (VIDRL) | Caly L., Seemann T., Sait, M., Schultz M., Druce J., Sherry, N.                                                                                                                                       | Oceania / Australia / Victoria                                      | 2020-03-31 | Victorian Public Health                                                 |
| EPI_ISL_430486                                                            | hCoV-19/Australia/VIC1002/2020                                                                                                                                                                        | Oceania / Australia / Victoria                                      | 2020-03-31 | Victorian Public Health                                                 |
| Laboratory and Victorian Infectious Diseases Reference Laboratory (VIDRL) | Caly L., Seemann T., Sait, M., Schultz M., Druce J., Sherry, N.                                                                                                                                       | Oceania / Australia / Victoria                                      | 2020-04-01 | Victorian Public Health                                                 |
| EPI_ISL_430490                                                            | hCoV-19/Australia/VIC1018/2020                                                                                                                                                                        | Oceania / Australia / Victoria                                      | 2020-04-01 | Victorian Public Health                                                 |
| Laboratory and Victorian Infectious Diseases Reference Laboratory (VIDRL) | Caly L., Seemann T., Sait, M., Schultz M., Druce J., Sherry, N.                                                                                                                                       | Oceania / Australia / Victoria                                      | 2020-04-01 | Victorian Public Health                                                 |
| EPI_ISL_430498                                                            | hCoV-19/Australia/VIC1208/2020                                                                                                                                                                        | Oceania / Australia / Victoria                                      | 2020-04-01 | Victorian Public Health                                                 |
| Laboratory and Victorian Infectious Diseases Reference Laboratory (VIDRL) | Caly L., Seemann T., Sait, M., Schultz M., Druce J., Sherry, N.                                                                                                                                       | Asia / China / Hubei / Wuhan                                        | 2020-01-02 | unknown State                                                           |
| EPI_ISL_406716                                                            | hCoV-19/Wuhan/WHU01/2020                                                                                                                                                                              | Asia / China / Hubei / Wuhan                                        | 2020-01-02 | unknown State                                                           |
| Key Laboratory of Virology, Wuhan University                              | Chen,L., Liu,W., Zhang,Q., Xu,K., Ye,G., Wu,W., Sun,Z., Liu,F., Wu,K., Mei,Y., Zhang,W., Chen,Y., Li,Y., Shi,M., Lan,K. and Liu,Y.                                                                    | Asia / China / Hubei / Wuhan                                        | 2020-01-02 | unknown State                                                           |
| EPI_ISL_406717                                                            | hCoV-19/Wuhan/WHU02/2020                                                                                                                                                                              | Asia / China / Hubei / Wuhan                                        | 2020-01-02 | unknown State                                                           |
| Key Laboratory of Virology, Wuhan University                              | Chen,L., Liu,W., Zhang,Q., Xu,K., Ye,G., Wu,W., Sun,Z., Liu,F., Wu,K., Mei,Y., Zhang,W., Chen,Y., Li,Y., Shi,M., Lan,K. and Liu,Y.                                                                    | Europe / France / Rhone-Alpes / Contamines                          | 2020-02-08 |                                                                         |
| EPI_ISL_410486                                                            | hCoV-19/France/RA739/2020                                                                                                                                                                             | Europe / France / Rhone-Alpes / Contamines                          | 2020-02-08 |                                                                         |
| CNR Virus des Infections Respiratoires - France SUD                       | Bal, Antonin; Destras, Gregory; Gaynard, Alexandre; Bouscambert-Duchamp, Maude; Cheynet, Valérie; Brengel-Pesce, Karen; Morfin-Sherpa, Florence; Valette, Martine; Josset, Laurence; Lina, Bruno.     | CNR Virus des Infections Respiratoires - France SUD                 |            |                                                                         |
| EPI_ISL_410531                                                            | hCoV-19/Japan/NA-20-05-1/2020                                                                                                                                                                         | Asia / Japan / Nara                                                 | 2020-01-25 | Dept. of Pathology, National Institute of Infectious Diseases           |
| National Institute of Infectious Diseases                                 | Tsuyoshi Sekizuka, Harutaka Katano, Shutoku Matsuyama, Naganori Nao, Kazuya Shirato, Motoi Suzuki, Hideki Hasegawa, Takaji Wakita, Makoto Takeda, Tadaki Suzuki, Makoto Kuroda                        | Pathogen Genomics Center, National Institute of Infectious Diseases |            |                                                                         |
| EPI_ISL_410532                                                            | hCoV-19/Japan/OS-20-07-1/2020                                                                                                                                                                         | Asia / Japan / Osaka                                                | 2020-01-23 | Dept. of Pathology, National Institute of Infectious Diseases           |
| National Institute of Infectious Diseases                                 | Tsuyoshi Sekizuka, Harutaka Katano, Shutoku Matsuyama, Naganori Nao, Kazuya Shirato, Motoi Suzuki, Hideki Hasegawa, Takaji Wakita, Makoto Takeda, Tadaki Suzuki, Makoto Kuroda                        | Pathogen Genomics Center, National Institute of Infectious Diseases |            |                                                                         |
| EPI_ISL_410535                                                            | hCoV-19/Singapore/4/2020                                                                                                                                                                              | Asia / Singapore                                                    | 2020-02-03 | National Centre for Infectious Diseases                                 |
| Programme in Emerging Infectious Diseases, Duke-NUS Medical School        | Anderson, Martin Linster, Yan Zhuang, Jayanthi Jayakumar, David CB Lye, Yee Sin Leo, Barnaby E Young, Yvonne CF Su, Gavin JD Smith                                                                    | Programme in Emerging Infectious Diseases, Duke-NUS Medical School  |            | Danielle E                                                              |
| EPI_ISL_410536                                                            | hCoV-19/Singapore/5/2020                                                                                                                                                                              | Asia / Singapore                                                    | 2020-02-06 | Singapore General Hospital, Molecular Laboratory, Division of Pathology |
| Programme in Emerging Infectious Diseases, Duke-NUS Medical School        | Danielle E Anderson, Martin Linster, Yan Zhuang, Jayanthi Jayakumar, Kian Sing Chan, Lynette LE Oon, Shirin Kalimuddin, Jenny GH Low, Yvonne CF Su, Gavin JD Smith                                    | Programme in Emerging Infectious Diseases, Duke-NUS Medical School  |            |                                                                         |
| EPI_ISL_410537                                                            | hCoV-19/Singapore/6/2020                                                                                                                                                                              | Asia / Singapore                                                    | 2020-02-09 | Singapore General Hospital, Molecular Laboratory, Division of Pathology |
| Programme in Emerging Infectious Diseases, Duke-NUS Medical School        | Danielle E Anderson, Martin Linster, Yan Zhuang, Jayanthi Jayakumar, Kian Sing Chan, Lynette LE Oon, Shirin Kalimuddin, Jenny GH Low, Yvonne CF Su, Gavin JD Smith                                    | Programme in Emerging Infectious Diseases, Duke-NUS Medical School  |            |                                                                         |
| EPI_ISL_410545                                                            | hCoV-19/Italy/INMI1-isl/2020                                                                                                                                                                          | Europe / Italy / Rome                                               | 2020-01-29 | INMI Lazzaro Spallanzani IRCCS                                          |
| Laboratory of Virology, INMI Lazzaro Spallanzani IRCCS                    | M. Gruber, Martina Rueca, Barbara Bartolini, Francesco Messina, Emanuela Giombini, Francesca Colavita, Concetta Castilletti, Eleonora Lalle, Fabrizio Carletti, Emanuele Nicastri, Giuseppe Ippolito. | Laboratory of Virology, INMI Lazzaro Spallanzani IRCCS              |            | Maria R. Capobianchi, Cesare E.                                         |
| EPI_ISL_410546                                                            | hCoV-19/Italy/INMI1-cs/2020                                                                                                                                                                           | Europe / Italy / Rome                                               | 2020-01-31 | INMI Lazzaro Spallanzani IRCCS                                          |
| Laboratory of Virology, INMI Lazzaro Spallanzani IRCCS                    | Maria R. Capobianchi, Cesare E.                                                                                                                                                                       | Laboratory of Virology, INMI Lazzaro Spallanzani IRCCS              |            |                                                                         |

M. Gruber, Martina Rueca, Fabrizio Carletti, Barbara Bartolini, Francesco Messina, Emanuela Giombini, Francesca Colavita, Concetta Castilletti, Eleonora Lalle, Emanuele Nicastrì, Giuseppe Ippolito.

EPI\_ISL\_411218 hCoV-19/France/IDF0571/2020 Europe / France / Ile-de-France / Paris 2020-02-02  
 Department of Infectious and Tropical Diseases, Bichat Claude Bernard Hospital, Paris Laboratoire Virpath,  
 CIRI U111, UCBL1, INSERM, CNRS, ENS Lyon Olivier Terrier, Aurélien Traversier, Julien Fouret, Yazdan Yazdanpanah, Xavier Lescure, Catherine Legras-Lachuer, Alexandre Gaymard, Bruno Lina, Manuel Rosa-Calatrava

EPI\_ISL\_411219 hCoV-19/France/IDF0386-islP1/2020 Europe / France / Ile-de-France / Paris 2020-01-28  
 Department of Infectious and Tropical Diseases, Bichat Claude Bernard Hospital, Paris Laboratoire Virpath,  
 CIRI U111, UCBL1, INSERM, CNRS, ENS Lyon Olivier Terrier, Aurélien Traversier, Julien Fouret, Yazdan Yazdanpanah, Xavier Lescure, Alexandre Gaymard, Bruno Lina, Manuel Rosa-Calatrava

EPI\_ISL\_411220 hCoV-19/France/IDF0386-islP3/2020 Europe / France / Ile-de-France / Paris 2020-01-28  
 Department of Infectious and Tropical Diseases, Bichat Claude Bernard Hospital, Paris Laboratoire Virpath,  
 CIRI U111, UCBL1, INSERM, CNRS, ENS Lyon Olivier Terrier, Aurélien Traversier, Julien Fouret, Yazdan Yazdanpanah, Xavier Lescure, Alexandre Gaymard, Bruno Lina, Manuel Rosa-Calatrava

EPI\_ISL\_411950 hCoV-19/Jiangsu/JS01/2020 Asia / China / Jiangsu 2020-01-23 NHC Key laboratory of  
 Enteric Pathogenic Microbiology, Institute of Pathogenic Microbiology Jiangsu Provincial Center for Disease  
 Control & Prevention Lunbiao Cui, Kangchen Zhao, Xiaojuan Zhu, Yiyue Ge, Tao Wu, Bin Wu, Yin Chen, Fengcai  
 Zhu, Baoli Zhu, Ming Wu

EPI\_ISL\_411951 hCoV-19/Sweden/01/2020 Europe / Sweden 2020-02-07 unknown Unit for Laboratory Development  
 and Technology Transfer, Public Health Agency of Sweden Bengner, M., Palmerus, M., Lindsjö, O., Lind Karlberg, M.,  
 Monteil, V., Appelberg, S., Brave, A., Muradrasoli, S. and Tegmark-Wisell, K.

EPI\_ISL\_411952 hCoV-19/Jiangsu/JS02/2020 Asia / China / Jiangsu 2020-01-24 NHC Key laboratory of  
 Enteric Pathogenic Microbiology, Institute of Pathogenic Microbiology Jiangsu Provincial Center for Disease  
 Control & Prevention Kangchen Zhao, Xiaojuan Zhu, Lunbiao Cui, Tao Wu, Yiyue Ge, Bin Wu, Yin Chen, Fengcai  
 Zhu, Baoli Zhu, Ming Wu

EPI\_ISL\_411953 hCoV-19/Jiangsu/JS03/2020 Asia / China / Jiangsu 2020-01-24 NHC Key laboratory of  
 Enteric Pathogenic Microbiology, Institute of Pathogenic Microbiology Jiangsu Provincial Center for Disease  
 Control & Prevention Kangchen Zhao, Xiaojuan Zhu, Lunbiao Cui, Tao Wu, Yiyue Ge, Bin Wu, Yin Chen, Fengcai  
 Zhu, Baoli Zhu, Ming Wu

EPI\_ISL\_411954 hCoV-19/USA/CA7/2020 North America / USA / California 2020-02-06 California  
 Department of Public Health Pathogen Discovery, Respiratory Viruses Branch, Division of Viral Diseases,  
 Centers for Diseases Control and Prevention Krista Queen, Anna Uehara, Jing Zhang, Yan Li, Ying Tao,  
 Clinton R. Paden, Haibin Wang, Shifang Kamili, Xiaoyan Lu, Brian Lynch, Senthil Kumar K. Sakthivel, Brett L.  
 Whitaker, Lijuan Wang, Janna' R. Murray, Susan I. Gerber, Stephen Lindstrom, Suxiang Tong

EPI\_ISL\_411955 hCoV-19/USA/CA8/2020 North America / USA / California 2020-02-10 California  
 Department of Public Health Pathogen Discovery, Respiratory Viruses Branch, Division of Viral Diseases,  
 Centers for Diseases Control and Prevention Krista Queen, Anna Uehara, Jing Zhang, Yan Li, Ying Tao,  
 Clinton R. Paden, Haibin Wang, Shifang Kamili, Xiaoyan Lu, Brian Lynch, Senthil Kumar K. Sakthivel, Brett L.  
 Whitaker, Lijuan Wang, Janna' R. Murray, Susan I. Gerber, Stephen Lindstrom, Suxiang Tong

EPI\_ISL\_411956 hCoV-19/USA/TX1/2020 North America / USA / Texas 2020-02-11 Texas Department of  
 State Health Services Pathogen Discovery, Respiratory Viruses Branch, Division of Viral Diseases, Centers for  
 Diseases Control and Prevention Krista Queen, Anna Uehara, Jing Zhang, Yan Li, Ying Tao, Clinton R. Paden,  
 Haibin Wang, Shifang Kamili, Xiaoyan Lu, Brian Lynch, Senthil Kumar K. Sakthivel, Brett L. Whitaker, Lijuan  
 Wang, Janna' R. Murray, Susan I. Gerber, Stephen Lindstrom, Suxiang Tong

EPI\_ISL\_411957 hCoV-19/China/WH-09/2020 Asia / China 2020-01-08 unknown Key Laboratory of Human  
 Diseases, Comparative Medicine, Institute of Laboratory Animal Science Linlin, B., Lili, R., Shuran, G.,  
 Jiangning, L., Feifei, Q., Qi, L., Fengdi, L., Jing, X., Wei, D., Pin, Y., Yanfeng, X., Yajin, Q., Hong, G., Qiang, W.,  
 Mingya, L., Guanpeng, W., Shunyi, W., Zhiqi, S., Li, G., Lan, C., Conghui, W., Ying, W., Xinming, W., Yan, X., Qi, J. and  
 Chuan, Q.

EPI\_ISL\_413851 hCoV-19/Guangdong/2020XN4373-P0039/2020 Asia / China / Guangdong 2020-01-30  
 Guangdong Provincial Institution of Public Health, Guangdong Provincial Center for Disease Control and  
 Prevention Guangdong Provincial Institution of Public Health Jing Lu, Louis du Plessis, Liu Zhe,  
 Jiufeng Sun, Sarah François, Huifang Lin, Moritz Kraemer, Jingju Peng, Qianlin Xiong, Runyu Yuan, Lilian Zeng,  
 Pingping Zhou, Chuming Liang, Tao Liu, Wei Li, Juan Su, Huanying Zheng, Kang Min, Song Tie, Bo Peng, Shisong  
 Fang, Wenzhe Su, Kuibiao Li, Ruilin Sun, Ru bai, Xi Tang, Minfeng Liang, Nuno Faria, Josh Quick, Andrew  
 Rambaut, Verity Hill, Wenjun Ma, Nick Loman, Oliver Pybus, Changwen Ke

EPI\_ISL\_413852 hCoV-19/Guangdong/2020XN4433-P0040/2020 Asia / China / Guangdong 2020-01-30  
 Guangdong Provincial Institution of Public Health, Guangdong Provincial Center for Disease Control and  
 Prevention Guangdong Provincial Institution of Public Health Jing Lu, Louis du Plessis, Liu Zhe,  
 Jiufeng Sun, Sarah François, Huifang Lin, Moritz Kraemer, Jingju Peng, Qianlin Xiong, Runyu Yuan, Lilian Zeng,  
 Pingping Zhou, Chuming Liang, Tao Liu, Wei Li, Juan Su, Huanying Zheng, Kang Min, Song Tie, Bo Peng, Shisong  
 Fang, Wenzhe Su, Kuibiao Li, Ruilin Sun, Ru bai, Xi Tang, Minfeng Liang, Nuno Faria, Josh Quick, Andrew  
 Rambaut, Verity Hill, Wenjun Ma, Nick Loman, Oliver Pybus, Changwen Ke

EPI\_ISL\_413853 hCoV-19/Guangdong/2020XN4243-P0035/2020 Asia / China / Guangdong 2020-01-30  
 Guangdong Provincial Institution of Public Health, Guangdong Provincial Center for Disease Control and  
 Prevention Guangdong Provincial Institution of Public Health Jing Lu, Louis du Plessis, Liu Zhe,  
 Jiufeng Sun, Sarah François, Huifang Lin, Moritz Kraemer, Jingju Peng, Qianlin Xiong, Runyu Yuan, Lilian Zeng,  
 Pingping Zhou, Chuming Liang, Tao Liu, Wei Li, Juan Su, Huanying Zheng, Kang Min, Song Tie, Bo Peng, Shisong  
 Fang, Wenzhe Su, Kuibiao Li, Ruilin Sun, Ru bai, Xi Tang, Minfeng Liang, Nuno Faria, Josh Quick, Andrew  
 Rambaut, Verity Hill, Wenjun Ma, Nick Loman, Oliver Pybus, Changwen Ke



EPI\_ISL\_413867 hCoV-19/Guangdong/GDSZ202015-P0019/2020 Asia / China / Guangdong Provincial Institution of Public Health, Guangdong Provincial Center for Disease Control and Prevention Guangdong Provincial Institution of Public Health Jing Lu, Louis du Plessis, Liu Zhe, Jiufeng Sun, Sarah François, Huifang Lin, Moritz Kraemer, Jingju Peng, Qianlin Xiong, Runyu Yuan, Lilian Zeng, Pingping Zhou, Chuming Liang, Tao Liu, Wei Li, Juan Su, Huanying Zheng, Kang Min, Song Tie, Bo Peng, Shisong Fang, Wenzhe Su, Kuibiao Li, Ruilin Sun, Ru bai, Xi Tang, Minfeng Liang, Nuno Faria, Josh Quick, Andrew Rambaut, Verity Hill, Wenjun Ma, Nick Loman, Oliver Pybus, Changwen Ke

EPI\_ISL\_414005 hCoV-19/England/200940527/2020 Europe / United Kingdom / England 2020-02-25  
Respiratory Virus Unit, Microbiology Services Colindale, Public Health England Respiratory Virus Unit, Microbiology Services Colindale, Public Health England Monica Galiano, Shahjahan Miah, Angie Lackenby, Omolola Akinbami, Tiina Talts, Leena Bhaw, Richard Myers, Steven Platt, Kirstin Edwards, Jonathan Hubb, Joanna Ellis, Maria Zambon

EPI\_ISL\_414006 hCoV-19/England/200990724/2020 Europe / United Kingdom / England 2020-02-28  
Respiratory Virus Unit, Microbiology Services Colindale, Public Health England Respiratory Virus Unit, Microbiology Services Colindale, Public Health England Monica Galiano, Shahjahan Miah, Angie Lackenby, Omolola Akinbami, Tiina Talts, Leena Bhaw, Richard Myers, Steven Platt, Kirstin Edwards, Jonathan Hubb, Joanna Ellis, Maria Zambon

EPI\_ISL\_414007 hCoV-19/England/200990725/2020 Europe / United Kingdom / England 2020-02-28  
Respiratory Virus Unit, Microbiology Services Colindale, Public Health England Respiratory Virus Unit, Microbiology Services Colindale, Public Health England Monica Galiano, Shahjahan Miah, Angie Lackenby, Omolola Akinbami, Tiina Talts, Leena Bhaw, Richard Myers, Steven Platt, Kirstin Edwards, Jonathan Hubb, Joanna Ellis, Maria Zambon

EPI\_ISL\_414008 hCoV-19/England/200960041/2020 Europe / United Kingdom / England 2020-02-27  
Respiratory Virus Unit, Microbiology Services Colindale, Public Health England Respiratory Virus Unit, Microbiology Services Colindale, Public Health England Monica Galiano, Shahjahan Miah, Angie Lackenby, Omolola Akinbami, Tiina Talts, Leena Bhaw, Richard Myers, Steven Platt, Kirstin Edwards, Jonathan Hubb, Joanna Ellis, Maria Zambon

EPI\_ISL\_414009 hCoV-19/England/200960515/2020 Europe / United Kingdom / England 2020-02-25  
Respiratory Virus Unit, Microbiology Services Colindale, Public Health England Respiratory Virus Unit, Microbiology Services Colindale, Public Health England Monica Galiano, Shahjahan Miah, Angie Lackenby, Omolola Akinbami, Tiina Talts, Leena Bhaw, Richard Myers, Steven Platt, Kirstin Edwards, Jonathan Hubb, Joanna Ellis, Maria Zambon

EPI\_ISL\_414010 hCoV-19/England/200981386/2020 Europe / United Kingdom / England 2020-02-26  
Respiratory Virus Unit, Microbiology Services Colindale, Public Health England Respiratory Virus Unit, Microbiology Services Colindale, Public Health England Monica Galiano, Shahjahan Miah, Angie Lackenby, Omolola Akinbami, Tiina Talts, Leena Bhaw, Richard Myers, Steven Platt, Kirstin Edwards, Jonathan Hubb, Joanna Ellis, Maria Zambon

EPI\_ISL\_414011 hCoV-19/England/200990006/2020 Europe / United Kingdom / England 2020-02-26  
Respiratory Virus Unit, Microbiology Services Colindale, Public Health England Respiratory Virus Unit, Microbiology Services Colindale, Public Health England Monica Galiano, Shahjahan Miah, Angie Lackenby, Omolola Akinbami, Tiina Talts, Leena Bhaw, Richard Myers, Steven Platt, Kirstin Edwards, Jonathan Hubb, Joanna Ellis, Maria Zambon

EPI\_ISL\_414012 hCoV-19/England/200990723/2020 Europe / United Kingdom / England 2020-02-27  
Respiratory Virus Unit, Microbiology Services Colindale, Public Health England Respiratory Virus Unit, Microbiology Services Colindale, Public Health England Monica Galiano, Shahjahan Miah, Angie Lackenby, Omolola Akinbami, Tiina Talts, Leena Bhaw, Richard Myers, Steven Platt, Kirstin Edwards, Jonathan Hubb, Joanna Ellis, Maria Zambon

EPI\_ISL\_414013 hCoV-19/England/201000003/2020 Europe / United Kingdom / England 2020-03-01  
Respiratory Virus Unit, Microbiology Services Colindale, Public Health England Respiratory Virus Unit, Microbiology Services Colindale, Public Health England Monica Galiano, Shahjahan Miah, Angie Lackenby, Omolola Akinbami, Tiina Talts, Leena Bhaw, Richard Myers, Steven Platt, Kirstin Edwards, Jonathan Hubb, Joanna Ellis, Maria Zambon

EPI\_ISL\_414014 hCoV-19/Brazil/SPBR-03/2020 South America / Brazil / Sao Paulo 2020-03-02  
Hospital Israelita Albert Einstein Instituto Adolfo Lutz, Interdisciplinary Procedures Center, Strategic Laboratory Claudio Tavares Sacchi, Claudia Regina Gonçalves, Katia Correia dos Santos, Carlos Henrique Camargo, Maria do Carmo Sampaio Tavares Timenetsky, Terezinha Maria de Paiva, Ester Cerdeira Sabino

EPI\_ISL\_414015 hCoV-19/Brazil/SPBR-06/2020 South America / Brazil / Sao Paulo / Sao Paulo 2020-02-29  
Hospital São Joaquim Beneficencia Portuguesa Instituto Adolfo Lutz, Interdisciplinary Procedures Center, Strategic Laboratory Claudio Tavares Sacchi, Claudia Regina Gonçalves, Simone Guadagnucci Morillo, Carlos Henrique Camargo, Maria do Carmo Sampaio Tavares Timenetsky, Fabiana Cristina Pereira dos Santos Terezinha Maria de Paiva, Ester Cerdeira Sabino

EPI\_ISL\_414016 hCoV-19/Brazil/SPBR-05/2020 South America / Brazil / Sao Paulo / Sao Paulo 2020-02-29  
Hospital São Joaquim Beneficencia Portuguesa Instituto Adolfo Lutz, Interdisciplinary Procedures Center, Strategic Laboratory Claudio Tavares Sacchi, Claudia Regina Gonçalves, Audrey Cilli, Carlos Henrique Camargo, Maria do Carmo Sampaio Tavares Timenetsky, Daniela Bernardes Borges da Silva, Terezinha Maria de Paiva, Ester Cerdeira Sabino

EPI\_ISL\_414017 hCoV-19/Brazil/SPBR-04/2020 South America / Brazil / Sao Paulo 2020-03-04  
Hospital São Joaquim Beneficencia Portuguesa Instituto Adolfo Lutz, Interdisciplinary Procedures Center, Strategic Laboratory Claudio Tavares Sacchi, Claudia Regina Gonçalves, Fabiana Cristina Pereira dos Santos, Carlos Henrique Camargo, Maria do Carmo Sampaio Tavares Timenetsky, Daniela Bernardes Borges da Silva,

|                                                 |                                                                                      |                                                                                                                                                                                                                                     |            |                                                                                |
|-------------------------------------------------|--------------------------------------------------------------------------------------|-------------------------------------------------------------------------------------------------------------------------------------------------------------------------------------------------------------------------------------|------------|--------------------------------------------------------------------------------|
| Terezinha Maria de Paiva, Ester Cerdeira Sabino |                                                                                      |                                                                                                                                                                                                                                     |            |                                                                                |
| EPI_ISL_414019                                  | hCoV-19/Switzerland/GE3121/2020                                                      | Europe / Switzerland / Geneva                                                                                                                                                                                                       | 2020-02-27 | Laboratoire de Virologie, HUG                                                  |
|                                                 | Swiss National Reference Centre for Influenza                                        | LAUBSCHER Florian et al.                                                                                                                                                                                                            |            |                                                                                |
| EPI_ISL_414020                                  | hCoV-19/Switzerland/GE5373/2020                                                      | Europe / Switzerland / Geneva                                                                                                                                                                                                       | 2020-02-27 | Laboratoire de Virologie, HUG                                                  |
|                                                 | Swiss National Reference Centre for Influenza                                        | LAUBSCHER Florian et al.                                                                                                                                                                                                            |            |                                                                                |
| EPI_ISL_414021                                  | hCoV-19/Switzerland/BL0902/2020                                                      | Europe / Switzerland / Basel                                                                                                                                                                                                        | 2020-02-27 | Laboratoire de Virologie, HUG                                                  |
|                                                 | Swiss National Reference Centre for Influenza                                        | LAUBSCHER Florian et al.                                                                                                                                                                                                            |            |                                                                                |
| EPI_ISL_414022                                  | hCoV-19/Switzerland/GE9586/2020                                                      | Europe / Switzerland / Geneva                                                                                                                                                                                                       | 2020-02-27 | Laboratoire de Virologie, HUG                                                  |
|                                                 | Swiss National Reference Centre for Influenza                                        | LAUBSCHER Florian et al.                                                                                                                                                                                                            |            |                                                                                |
| EPI_ISL_414023                                  | hCoV-19/Switzerland/VD5615/2020                                                      | Europe / Switzerland / Vaud                                                                                                                                                                                                         | 2020-03-01 | Laboratoire de Virologie, HUG                                                  |
|                                                 | Swiss National Reference Centre for Influenza                                        | LAUBSCHER Florian et al.                                                                                                                                                                                                            |            |                                                                                |
| EPI_ISL_414027                                  | hCoV-19/Scotland/CVR05/2020                                                          | Europe / United Kingdom / Scotland                                                                                                                                                                                                  | 2020-03-04 | West of Scotland Specialist Virology Centre, NHSGCC                            |
|                                                 | MRC-University of Glasgow Centre for Virus Research                                  | Emma Thomson, Antonia Ho; Kathy Smollett, Daniel Mair, Stephen Carmichael, Ana da Silva Filipe; Richard Orton, David L Robertson; Alasdair MacLean, Rory Gunson.                                                                    |            |                                                                                |
| EPI_ISL_414040                                  | hCoV-19/England/200641094/2020                                                       | Europe / United Kingdom / England                                                                                                                                                                                                   | 2020-02-05 | Respiratory Virus Unit, Microbiology Services Colindale, Public Health England |
|                                                 | Microbiology Services Colindale, Public Health England                               | Monica Galiano, Shahjahan Miah, Angie Lackenby, Omolola Akinbami, Tiina Talts, Leena Bhaw, Richard Myers, Steven Platt, Kirstin Edwards, Jonathan Hubb, Joanna Ellis, Maria Zambon                                                  |            |                                                                                |
| EPI_ISL_414041                                  | hCoV-19/England/200690245/2020                                                       | Europe / United Kingdom / England                                                                                                                                                                                                   | 2020-02-08 | Respiratory Virus Unit, Microbiology Services Colindale, Public Health England |
|                                                 | Microbiology Services Colindale, Public Health England                               | Monica Galiano, Shahjahan Miah, Angie Lackenby, Omolola Akinbami, Tiina Talts, Leena Bhaw, Richard Myers, Steven Platt, Kirstin Edwards, Jonathan Hubb, Joanna Ellis, Maria Zambon                                                  |            |                                                                                |
| EPI_ISL_414042                                  | hCoV-19/England/200690300/2020                                                       | Europe / United Kingdom / England                                                                                                                                                                                                   | 2020-02-08 | Respiratory Virus Unit, Microbiology Services Colindale, Public Health England |
|                                                 | Microbiology Services Colindale, Public Health England                               | Monica Galiano, Shahjahan Miah, Angie Lackenby, Omolola Akinbami, Tiina Talts, Leena Bhaw, Richard Myers, Steven Platt, Kirstin Edwards, Jonathan Hubb, Joanna Ellis, Maria Zambon                                                  |            |                                                                                |
| EPI_ISL_414043                                  | hCoV-19/England/200690306/2020                                                       | Europe / United Kingdom / England                                                                                                                                                                                                   | 2020-02-07 | Respiratory Virus Unit, Microbiology Services Colindale, Public Health England |
|                                                 | Microbiology Services Colindale, Public Health England                               | Monica Galiano, Shahjahan Miah, Angie Lackenby, Omolola Akinbami, Tiina Talts, Leena Bhaw, Richard Myers, Steven Platt, Kirstin Edwards, Jonathan Hubb, Joanna Ellis, Maria Zambon                                                  |            |                                                                                |
| EPI_ISL_414044                                  | hCoV-19/England/200690756/2020                                                       | Europe / United Kingdom / England                                                                                                                                                                                                   | 2020-02-08 | Respiratory Virus Unit, Microbiology Services Colindale, Public Health England |
|                                                 | Microbiology Services Colindale, Public Health England                               | Monica Galiano, Shahjahan Miah, Angie Lackenby, Omolola Akinbami, Tiina Talts, Leena Bhaw, Richard Myers, Steven Platt, Kirstin Edwards, Jonathan Hubb, Joanna Ellis, Maria Zambon                                                  |            |                                                                                |
| EPI_ISL_414045                                  | hCoV-19/Brazil/RJ-314/2020                                                           | South America / Brazil / Rio de Janeiro / Rio de Janeiro                                                                                                                                                                            | 2020-03-04 | LACEN RJ - Laboratório Central de Saúde Pública Noel Nutels                    |
|                                                 | Instituto Oswaldo Cruz FIOCRUZ - Laboratory of Respiratory Viruses and Measles (LVR) | Paola Resende, Alisson Fabri, Joilson Xavier, Sunando Roy, Fernando Motta, Aline Mattos, Milene Miranda, Cristiana Garcia, Braulia Caetano, Maria Ogrzewalska, Jonathan Lopes, Luciana Appolinario, Maria Nóbrega, Marilda Siqueira |            |                                                                                |
| EPI_ISL_416600                                  | hCoV-19/Japan/DP0438/2020                                                            | Asia / Japan / unknown                                                                                                                                                                                                              | 2020-02-16 | Japanese Quarantine Stations                                                   |
|                                                 | Pathogen Genomics Center, National Institute of Infectious Diseases                  | Tsuyoshi Sekizuka, Kentaro Itokawa, Rina Tanaka, Masanori Hashino, Tsutomu Kageyama, Shinji Saito, Ikuyo Takayama, Hideki Hasegawa, Takuri Takahashi, Hajime Kamiya, Takuya Yamagishi, Motoi Suzuki, Takaji Wakita, Makoto Kuroda   |            |                                                                                |
| EPI_ISL_416601                                  | hCoV-19/Japan/DP0457/2020                                                            | Asia / Japan / unknown                                                                                                                                                                                                              | 2020-02-16 | Japanese Quarantine Stations                                                   |
|                                                 | Pathogen Genomics Center, National Institute of Infectious Diseases                  | Tsuyoshi Sekizuka, Kentaro Itokawa, Rina Tanaka, Masanori Hashino, Tsutomu Kageyama, Shinji Saito, Ikuyo Takayama, Hideki Hasegawa, Takuri Takahashi, Hajime Kamiya, Takuya Yamagishi, Motoi Suzuki, Takaji Wakita, Makoto Kuroda   |            |                                                                                |
| EPI_ISL_416602                                  | hCoV-19/Japan/DP0462/2020                                                            | Asia / Japan / unknown                                                                                                                                                                                                              | 2020-02-16 | Japanese Quarantine Stations                                                   |
|                                                 | Pathogen Genomics Center, National Institute of Infectious Diseases                  | Tsuyoshi Sekizuka, Kentaro Itokawa, Rina Tanaka, Masanori Hashino, Tsutomu Kageyama, Shinji Saito, Ikuyo Takayama, Hideki Hasegawa, Takuri Takahashi, Hajime Kamiya, Takuya Yamagishi, Motoi Suzuki, Takaji Wakita, Makoto Kuroda   |            |                                                                                |
| EPI_ISL_416603                                  | hCoV-19/Japan/DP0464/2020                                                            | Asia / Japan / unknown                                                                                                                                                                                                              | 2020-02-16 | Japanese Quarantine Stations                                                   |
|                                                 | Pathogen Genomics Center, National Institute of Infectious Diseases                  | Tsuyoshi Sekizuka, Kentaro Itokawa, Rina Tanaka, Masanori Hashino, Tsutomu Kageyama, Shinji Saito, Ikuyo Takayama, Hideki Hasegawa, Takuri Takahashi, Hajime Kamiya, Takuya Yamagishi, Motoi Suzuki, Takaji Wakita, Makoto Kuroda   |            |                                                                                |
| EPI_ISL_416604                                  | hCoV-19/Japan/DP0476/2020                                                            | Asia / Japan / unknown                                                                                                                                                                                                              | 2020-02-16 | Japanese Quarantine Stations                                                   |
|                                                 | Pathogen Genomics Center, National Institute of Infectious Diseases                  | Tsuyoshi Sekizuka, Kentaro Itokawa, Rina Tanaka, Masanori Hashino, Tsutomu Kageyama, Shinji Saito, Ikuyo Takayama, Hideki Hasegawa, Takuri Takahashi, Hajime Kamiya, Takuya Yamagishi, Motoi Suzuki, Takaji Wakita, Makoto Kuroda   |            |                                                                                |
| EPI_ISL_416605                                  | hCoV-19/Japan/DP0481/2020                                                            | Asia / Japan / unknown                                                                                                                                                                                                              | 2020-02-16 | Japanese Quarantine Stations                                                   |
|                                                 | Pathogen Genomics Center, National Institute of Infectious Diseases                  | Tsuyoshi Sekizuka, Kentaro Itokawa, Rina Tanaka, Masanori Hashino, Tsutomu Kageyama, Shinji Saito, Ikuyo Takayama, Hideki Hasegawa, Takuri Takahashi, Hajime Kamiya, Takuya Yamagishi, Motoi Suzuki, Takaji Wakita, Makoto Kuroda   |            |                                                                                |
| EPI_ISL_416606                                  | hCoV-19/Japan/DP0482/2020                                                            | Asia / Japan / unknown                                                                                                                                                                                                              | 2020-02-16 | Japanese Quarantine Stations                                                   |









|                                                                                                                                                                                                                                                                                                                                                                                               |                                                                                   |                                                |            |                                                                      |
|-----------------------------------------------------------------------------------------------------------------------------------------------------------------------------------------------------------------------------------------------------------------------------------------------------------------------------------------------------------------------------------------------|-----------------------------------------------------------------------------------|------------------------------------------------|------------|----------------------------------------------------------------------|
| Virology Lab                                                                                                                                                                                                                                                                                                                                                                                  | UW Virology Lab Pavitra Roychoudhury, Hong Xie, Keith Jerome, Alexander Greninger |                                                |            |                                                                      |
| EPI_ISL_416690                                                                                                                                                                                                                                                                                                                                                                                | hCoV-19/USA/WA-UW152/2020                                                         | North America / USA / Washington               | 2020-03-13 | UW                                                                   |
| Virology Lab                                                                                                                                                                                                                                                                                                                                                                                  | UW Virology Lab Pavitra Roychoudhury, Hong Xie, Keith Jerome, Alexander Greninger |                                                |            |                                                                      |
| EPI_ISL_416691                                                                                                                                                                                                                                                                                                                                                                                | hCoV-19/USA/WA-UW153/2020                                                         | North America / USA / Washington               | 2020-03-13 | UW                                                                   |
| Virology Lab                                                                                                                                                                                                                                                                                                                                                                                  | UW Virology Lab Pavitra Roychoudhury, Hong Xie, Keith Jerome, Alexander Greninger |                                                |            |                                                                      |
| EPI_ISL_416692                                                                                                                                                                                                                                                                                                                                                                                | hCoV-19/USA/WA-UW154/2020                                                         | North America / USA / Washington               | 2020-03-14 | UW                                                                   |
| Virology Lab                                                                                                                                                                                                                                                                                                                                                                                  | UW Virology Lab Pavitra Roychoudhury, Hong Xie, Keith Jerome, Alexander Greninger |                                                |            |                                                                      |
| EPI_ISL_416693                                                                                                                                                                                                                                                                                                                                                                                | hCoV-19/USA/WA-UW155/2020                                                         | North America / USA / Washington               | 2020-03-12 | UW                                                                   |
| Virology Lab                                                                                                                                                                                                                                                                                                                                                                                  | UW Virology Lab Pavitra Roychoudhury, Hong Xie, Keith Jerome, Alexander Greninger |                                                |            |                                                                      |
| EPI_ISL_416694                                                                                                                                                                                                                                                                                                                                                                                | hCoV-19/USA/WA-UW156/2020                                                         | North America / USA / Washington               | 2020-03-13 | UW                                                                   |
| Virology Lab                                                                                                                                                                                                                                                                                                                                                                                  | UW Virology Lab Pavitra Roychoudhury, Hong Xie, Keith Jerome, Alexander Greninger |                                                |            |                                                                      |
| EPI_ISL_416696                                                                                                                                                                                                                                                                                                                                                                                | hCoV-19/USA/CT-UW158/2020                                                         | North America / USA / Connecticut              | 2020-03-13 | UW                                                                   |
| Virology Lab                                                                                                                                                                                                                                                                                                                                                                                  | UW Virology Lab Pavitra Roychoudhury, Hong Xie, Keith Jerome, Alexander Greninger |                                                |            |                                                                      |
| EPI_ISL_416697                                                                                                                                                                                                                                                                                                                                                                                | hCoV-19/USA/CT-UW159/2020                                                         | North America / USA / Connecticut              | 2020-03-13 | UW                                                                   |
| Virology Lab                                                                                                                                                                                                                                                                                                                                                                                  | UW Virology Lab Pavitra Roychoudhury, Hong Xie, Keith Jerome, Alexander Greninger |                                                |            |                                                                      |
| EPI_ISL_416698                                                                                                                                                                                                                                                                                                                                                                                | hCoV-19/USA/WA-UW160/2020                                                         | North America / USA / Washington               | 2020-03-13 | UW                                                                   |
| Virology Lab                                                                                                                                                                                                                                                                                                                                                                                  | UW Virology Lab Pavitra Roychoudhury, Hong Xie, Keith Jerome, Alexander Greninger |                                                |            |                                                                      |
| EPI_ISL_416699                                                                                                                                                                                                                                                                                                                                                                                | hCoV-19/USA/WA-UW161/2020                                                         | North America / USA / Washington               | 2020-03-13 | UW                                                                   |
| Virology Lab                                                                                                                                                                                                                                                                                                                                                                                  | UW Virology Lab Pavitra Roychoudhury, Hong Xie, Keith Jerome, Alexander Greninger |                                                |            |                                                                      |
| EPI_ISL_417400                                                                                                                                                                                                                                                                                                                                                                                | hCoV-19/Australia/NSW44/2020                                                      | Oceania / Australia / New South Wales / Sydney | 2020-03-10 |                                                                      |
| Centre for Infectious Diseases and Microbiology Public Health NSW Health Pathology - Institute of Clinical Pathology and Medical Research; Westmead Hospital; University of Sydney Rockett R, Eden J-S, Lam C, Gray K, Timms V, Gall M, Arnott A, Sadsad R, Carter I, Rahman H, Holmes EC, O'Sullivan MV, Sintchenko V, Chen SC, Maddocks S, Kok J and Dwyer DE for the 2019-nCoV Study Group |                                                                                   |                                                |            |                                                                      |
| EPI_ISL_417401                                                                                                                                                                                                                                                                                                                                                                                | hCoV-19/Australia/NSW45/2020                                                      | Oceania / Australia / New South Wales / Sydney | 2020-03-13 |                                                                      |
| Centre for Infectious Diseases and Microbiology Public Health NSW Health Pathology - Institute of Clinical Pathology and Medical Research; Westmead Hospital; University of Sydney Eden J-S, Lam C, Gray K, Timms V, Gall M, Arnott A, Sadsad R, Carter I, Rahman H, Holmes EC, O'Sullivan MV, Sintchenko V, Chen SC, Maddocks S, Kok J, Dwyer DE and Rockett R for the 2019-nCoV Study Group |                                                                                   |                                                |            |                                                                      |
| EPI_ISL_417402                                                                                                                                                                                                                                                                                                                                                                                | hCoV-19/Australia/NSW47/2020                                                      | Oceania / Australia / New South Wales / Sydney | 2020-03-13 |                                                                      |
| Centre for Infectious Diseases and Microbiology Public Health NSW Health Pathology - Institute of Clinical Pathology and Medical Research; Westmead Hospital; University of Sydney Lam C, Gray K, Timms V, Gall M, Arnott A, Sadsad R, Carter I, Rahman H, Holmes EC, O'Sullivan MV, Sintchenko V, Chen SC, Maddocks S, Kok J, Dwyer DE, Rockett R and Eden J-S for the 2019-nCoV Study Group |                                                                                   |                                                |            |                                                                      |
| EPI_ISL_417403                                                                                                                                                                                                                                                                                                                                                                                | hCoV-19/Australia/NSW48/2020                                                      | Oceania / Australia / New South Wales / Sydney | 2020-03-14 |                                                                      |
| Centre for Infectious Diseases and Microbiology Public Health NSW Health Pathology - Institute of Clinical Pathology and Medical Research; Westmead Hospital; University of Sydney Gray K, Timms V, Gall M, Arnott A, Sadsad R, Carter I, Rahman H, Holmes EC, O'Sullivan MV, Sintchenko V, Chen SC, Maddocks S, Kok J, Dwyer DE, Rockett R, Eden J-S and Lam C for the 2019-nCoV Study Group |                                                                                   |                                                |            |                                                                      |
| EPI_ISL_417404                                                                                                                                                                                                                                                                                                                                                                                | hCoV-19/Australia/NSW50/2020                                                      | Oceania / Australia / New South Wales / Sydney | 2020-03-12 |                                                                      |
| Centre for Infectious Diseases and Microbiology Public Health NSW Health Pathology - Institute of Clinical Pathology and Medical Research; Westmead Hospital; University of Sydney Timms V, Gall M, Arnott A, Sadsad R, Carter I, Rahman H, Holmes EC, O'Sullivan MV, Sintchenko V, Chen SC, Maddocks S, Kok J, Dwyer DE, Rockett R, Eden J-S, Lam C and Gray K for the 2019-nCoV Study Group |                                                                                   |                                                |            |                                                                      |
| EPI_ISL_417405                                                                                                                                                                                                                                                                                                                                                                                | hCoV-19/Australia/NSW52/2020                                                      | Oceania / Australia / New South Wales / Sydney | 2020-03-11 |                                                                      |
| Centre for Infectious Diseases and Microbiology Public Health NSW Health Pathology - Institute of Clinical Pathology and Medical Research; Westmead Hospital; University of Sydney Gall M, Arnott A, Sadsad R, Carter I, Rahman H, Holmes EC, O'Sullivan MV, Sintchenko V, Chen SC, Maddocks S, Kok J, Dwyer DE, Rockett R, Eden J-S, Lam C, Gray K and Timms V for the 2019-nCoV Study Group |                                                                                   |                                                |            |                                                                      |
| EPI_ISL_417406                                                                                                                                                                                                                                                                                                                                                                                | hCoV-19/Australia/NSW53/2020                                                      | Oceania / Australia / New South Wales / Sydney | 2020-03-11 |                                                                      |
| Centre for Infectious Diseases and Microbiology Public Health NSW Health Pathology - Institute of Clinical Pathology and Medical Research; Westmead Hospital; University of Sydney Arnott A, Sadsad R, Carter I, Rahman H, Holmes EC, O'Sullivan MV, Sintchenko V, Chen SC, Maddocks S, Kok J, Dwyer DE, Rockett R, Eden J-S, Lam C, Gray K, Timms V and Gall M for the 2019-nCoV Study Group |                                                                                   |                                                |            |                                                                      |
| EPI_ISL_417407                                                                                                                                                                                                                                                                                                                                                                                | hCoV-19/Australia/NSW54/2020                                                      | Oceania / Australia / New South Wales / Sydney | 2020-03-14 |                                                                      |
| Centre for Infectious Diseases and Microbiology Public Health NSW Health Pathology - Institute of Clinical Pathology and Medical Research; Westmead Hospital; University of Sydney Sadsad R, Carter I, Rahman H, Holmes EC, O'Sullivan MV, Sintchenko V, Chen SC, Maddocks S, Kok J, Dwyer DE, Rockett R, Eden J-S, Lam C, Gray K, Timms V, Gall M and Arnott A for the 2019-nCoV Study Group |                                                                                   |                                                |            |                                                                      |
| EPI_ISL_417917                                                                                                                                                                                                                                                                                                                                                                                | hCoV-19/Malaysia/189332/2020                                                      | Asia / Malaysia / Kuala Lumpur                 | 2020-03-20 | Department of Medical Microbiology, University Malaya Medical Centre |
| Department of Medical Microbiology, University Malaya Medical Centre Department of Medical Microbiology, Faculty of Medicine, University of Malaya                                                                                                                                                                                                                                            |                                                                                   |                                                |            |                                                                      |
| Yoong Min CHONG, Sasheela PONNAMPALAVANAR, Sharifah Faridah SYED OMAR, Adeeba KAMARULZAMAN, Vijayan MUNUSAMY, Chee Kuan WONG, Cindy Shuan Ju TEH, I-Ching SAM, Yoke Fun Chan, University Malaya Medical Centre COVID Team                                                                                                                                                                     |                                                                                   |                                                |            |                                                                      |
| EPI_ISL_417918                                                                                                                                                                                                                                                                                                                                                                                | hCoV-19/Malaysia/188407/2020                                                      | Asia / Malaysia / Kuala Lumpur                 | 2020-03-18 | Department of Medical Microbiology, University Malaya Medical Centre |
| Department of Medical Microbiology, Faculty of Medicine, University of Malaya Yoong Min CHONG, Sasheela PONNAMPALAVANAR, Sharifah Faridah SYED OMAR, Adeeba KAMARULZAMAN, Vijayan MUNUSAMY, Chee Kuan WONG, Cindy Shuan Ju TEH, I-Ching SAM, Yoke Fun Chan, University Malaya Medical Centre COVID Team                                                                                       |                                                                                   |                                                |            |                                                                      |
| EPI_ISL_417921                                                                                                                                                                                                                                                                                                                                                                                | hCoV-19/Italy/INMI3/2020                                                          | Europe / Italy / Rome                          | 2020-03-01 | INMI Lazzaro Spallanzani IRCCS                                       |
| Laboratory of Virology, INMI Lazzaro Spallanzani IRCCS Martina Rueca, Barbara                                                                                                                                                                                                                                                                                                                 |                                                                                   |                                                |            |                                                                      |

Bartolini, Francesco Messina, Cesare E. M. Gruber, Emanuela Giombini, Maria R. Capobianchi, Fabrizio Carletti, Francesca Colavita, Concetta Castilletti, Eleonora Lalle, Daniele Lapa, Giuseppe Ippolito.  
 EPI\_ISL\_417922 hCoV-19/Italy/INMI4/2020 Europe / Italy / Rome 2020-02-28 INMI Lazzaro  
 Spallanzani IRCCS Laboratory of Virology, INMI Lazzaro Spallanzani IRCCS Cesare E. M. Gruber, Martina Rueca, Barbara Bartolini, Francesco Messina, Emanuela Giombini, Maria R. Capobianchi, Fabrizio Carletti, Francesca Colavita, Concetta Castilletti, Eleonora Lalle, Daniele Lapa, Giuseppe Ippolito.  
 EPI\_ISL\_417923 hCoV-19/Italy/INMI5/2020 Europe / Italy / Rome 2020-03-04 INMI Lazzaro  
 Spallanzani IRCCS Laboratory of Virology, INMI Lazzaro Spallanzani IRCCS Francesco Messina, Barbara Bartolini, Martina Rueca, Cesare E. M. Gruber, Emanuela Giombini, Maria R. Capobianchi, Fabrizio Carletti, Francesca Colavita, Concetta Castilletti, Eleonora Lalle, Daniele Lapa, Giuseppe Ippolito.  
 EPI\_ISL\_417924 hCoV-19/Colombia/INS-79256/2020 South America / Colombia / Antioquia 2020-03-11  
 Secretaría de Salud Medellín Instituto Nacional de Salud, Universidad Cooperativa de Colombia, Instituto Alexander von Humboldt, Imperial College-London, London School of Hygiene & Tropical Medicine Marcela Mercado-Reyes, Katherine Laiton-Donato, Diego A. Álvarez-Díaz, Carlos Franco-Muñoz, Jose A. Usme-Ciro, Gloria Puerto, Nicolás D. Franco-Sierra, Mailyn A. Gonzalez, Zulma M. Cucunubá, Christian Julian Villabona-Arenas, Liz Villabona-Arenas, Sussy Echeverria-Londoño, Astrid C. Flórez, Sergio Gomez Rangel, Luz Dary Rodriguez, Juliana Barbosa, Erika Ospitia, Diana Marcela Walteros-Acero, Martha Lucia Ospina Martinez  
 EPI\_ISL\_417931 hCoV-19/USA/CA-CZB05/2020 North America / USA / California / San Francisco 2020-03-18 UCSF Clinical Microbiology Laboratory Chan-Zuckerberg Biohub Shaun Arevalo, Josh Batson, Olga Botvinnik, Gloria Castaneda, Angela Detweiler, David Dynerman, Samantha Hao, Jack Kamm, Amy Kistler, G. Renuka Kumar, Chaz Langelier, Lucy Li, Steve Miller, Lusajo Mwakibete, Norma Neff, Angela Pisco, Maira Phelps, Michelle Tan, Chunyu Zhao  
 EPI\_ISL\_417932 hCoV-19/USA/CA-CZB06/2020 North America / USA / California / San Francisco 2020-03-18 UCSF Clinical Microbiology Laboratory Chan-Zuckerberg Biohub Shaun Arevalo, Josh Batson, Olga Botvinnik, Gloria Castaneda, Angela Detweiler, David Dynerman, Samantha Hao, Jack Kamm, Amy Kistler, G. Renuka Kumar, Chaz Langelier, Lucy Li, Steve Miller, Lusajo Mwakibete, Norma Neff, Angela Pisco, Maira Phelps, Michelle Tan, Chunyu Zhao  
 EPI\_ISL\_417933 hCoV-19/USA/CA-CZB07/2020 North America / USA / California / San Francisco 2020-03-18 UCSF Clinical Microbiology Laboratory Chan-Zuckerberg Biohub Shaun Arevalo, Josh Batson, Olga Botvinnik, Gloria Castaneda, Angela Detweiler, David Dynerman, Samantha Hao, Jack Kamm, Amy Kistler, G. Renuka Kumar, Chaz Langelier, Lucy Li, Steve Miller, Lusajo Mwakibete, Norma Neff, Angela Pisco, Maira Phelps, Michelle Tan, Chunyu Zhao  
 EPI\_ISL\_417935 hCoV-19/USA/CA-CZB011a/2020 North America / USA / California / San Francisco 2020-03-18 UCSF Clinical Microbiology Laboratory Chan-Zuckerberg Biohub Shaun Arevalo, Josh Batson, Olga Botvinnik, Gloria Castaneda, Angela Detweiler, David Dynerman, Samantha Hao, Jack Kamm, Amy Kistler, G. Renuka Kumar, Chaz Langelier, Lucy Li, Steve Miller, Lusajo Mwakibete, Norma Neff, Angela Pisco, Maira Phelps, Michelle Tan, Chunyu Zhao  
 EPI\_ISL\_417937 hCoV-19/USA/CA-CZB013/2020 North America / USA / California / San Francisco 2020-03-18 UCSF Clinical Microbiology Laboratory Chan-Zuckerberg Biohub Shaun Arevalo, Josh Batson, Olga Botvinnik, Gloria Castaneda, Angela Detweiler, David Dynerman, Samantha Hao, Jack Kamm, Amy Kistler, G. Renuka Kumar, Chaz Langelier, Lucy Li, Steve Miller, Lusajo Mwakibete, Norma Neff, Angela Pisco, Maira Phelps, Michelle Tan, Chunyu Zhao  
 EPI\_ISL\_417938 hCoV-19/USA/CA-CZB014/2020 North America / USA / California / San Francisco 2020-03-18 UCSF Clinical Microbiology Laboratory Chan-Zuckerberg Biohub Shaun Arevalo, Josh Batson, Olga Botvinnik, Gloria Castaneda, Angela Detweiler, David Dynerman, Samantha Hao, Jack Kamm, Amy Kistler, G. Renuka Kumar, Chaz Langelier, Lucy Li, Steve Miller, Lusajo Mwakibete, Norma Neff, Angela Pisco, Maira Phelps, Michelle Tan, Chunyu Zhao  
 EPI\_ISL\_417939 hCoV-19/USA/CA-CZB015a/2020 North America / USA / California / San Francisco 2020-03-18 UCSF Clinical Microbiology Laboratory Chan-Zuckerberg Biohub Shaun Arevalo, Josh Batson, Olga Botvinnik, Gloria Castaneda, Angela Detweiler, David Dynerman, Samantha Hao, Jack Kamm, Amy Kistler, G. Renuka Kumar, Chaz Langelier, Lucy Li, Steve Miller, Lusajo Mwakibete, Norma Neff, Angela Pisco, Maira Phelps, Michelle Tan, Chunyu Zhao  
 EPI\_ISL\_417941 hCoV-19/DRC/73/2020 Africa / Democratic Republic of the Congo / Kinshasa 2020-03-18  
 Viral Respiratory Lab, National Institute for Biomedical Research (INRB) Pathogen Sequencing Lab, National Institute for Biomedical Research (INRB) Placide Mbala-Kingebeni, Edith Nkwembe, Eddy Kinganda-Lusamaki, Amuri Aziza, Catherine Pratt, Matthias Pauthner, Josh Quick, Allison Black, James Hadfield, Trevor Bedford, Ian Goodfellow, Nick Loman, Kristian Andersen, Michael Wiley, Steve Ahuka-Mundeke, Jean-Jacques Muyembe Tamfum  
 EPI\_ISL\_417942 hCoV-19/DRC/80/2020 Africa / Democratic Republic of the Congo / Kinshasa 2020-03-18  
 Viral Respiratory Lab, National Institute for Biomedical Research (INRB) Pathogen Sequencing Lab, National Institute for Biomedical Research (INRB) Placide Mbala-Kingebeni, Edith Nkwembe, Eddy Kinganda-Lusamaki, Amuri Aziza, Catherine Pratt, Matthias Pauthner, Josh Quick, Allison Black, James Hadfield, Trevor Bedford, Ian Goodfellow, Nick Loman, Kristian Andersen, Michael Wiley, Steve Ahuka-Mundeke, Jean-Jacques Muyembe Tamfum  
 EPI\_ISL\_417944 hCoV-19/DRC/81/2020 Africa / Democratic Republic of the Congo / Kinshasa 2020-03-18  
 Viral Respiratory Lab, National Institute for Biomedical Research (INRB) Pathogen Sequencing Lab, National Institute for Biomedical Research (INRB) Placide Mbala-Kingebeni, Edith Nkwembe, Eddy Kinganda-Lusamaki, Amuri Aziza, Catherine Pratt, Matthias Pauthner, Josh Quick, Allison Black, James Hadfield, Trevor Bedford, Ian Goodfellow, Nick Loman, Kristian Andersen, Michael Wiley, Steve Ahuka-Mundeke, Jean-Jacques Muyembe Tamfum

EPI\_ISL\_417946 hCoV-19/DRC/82/2020 Africa / Democratic Republic of the Congo / Kinshasa 2020-03-18  
Viral Respiratory Lab, National Institute for Biomedical Research (INRB) Pathogen Sequencing Lab,  
National Institute for Biomedical Research (INRB) Placide Mbala-Kingebeni, Edith Nkwembe, Eddy Kinganda-  
Lusamaki, Amuri Aziza, Catherine Pratt, Matthias Pauthner, Josh Quick, Allison Black, James Hadfield, Trevor  
Bedford, Ian Goodfellow, Nick Loman, Kristian Andersen, Michael Wiley, Steve Ahuka-Mundeke, Jean-Jacques  
Muyembe Tamfum

EPI\_ISL\_417947 hCoV-19/DRC/94/2020 Africa / Democratic Republic of the Congo / Kinshasa 2020-03-19  
Viral Respiratory Lab, National Institute for Biomedical Research (INRB) Pathogen Sequencing Lab,  
National Institute for Biomedical Research (INRB) Placide Mbala-Kingebeni, Edith Nkwembe, Eddy Kinganda-  
Lusamaki, Amuri Aziza, Catherine Pratt, Matthias Pauthner, Josh Quick, Allison Black, James Hadfield, Trevor  
Bedford, Ian Goodfellow, Nick Loman, Kristian Andersen, Michael Wiley, Steve Ahuka-Mundeke, Jean-Jacques  
Muyembe Tamfum

EPI\_ISL\_417948 hCoV-19/DRC/108/2020 Africa / Democratic Republic of the Congo / Kinshasa 2020-03-19  
Viral Respiratory Lab, National Institute for Biomedical Research (INRB) Pathogen Sequencing Lab,  
National Institute for Biomedical Research (INRB) Placide Mbala-Kingebeni, Edith Nkwembe, Eddy Kinganda-  
Lusamaki, Amuri Aziza, Catherine Pratt, Matthias Pauthner, Josh Quick, Allison Black, James Hadfield, Trevor  
Bedford, Ian Goodfellow, Nick Loman, Kristian Andersen, Michael Wiley, Steve Ahuka-Mundeke, Jean-Jacques  
Muyembe Tamfum

EPI\_ISL\_417950 hCoV-19/DRC/158/2020 Africa / Democratic Republic of the Congo / Kinshasa 2020-03-20  
Viral Respiratory Lab, National Institute for Biomedical Research (INRB) Pathogen Sequencing Lab,  
National Institute for Biomedical Research (INRB) Placide Mbala-Kingebeni, Edith Nkwembe, Eddy Kinganda-  
Lusamaki, Amuri Aziza, Catherine Pratt, Matthias Pauthner, Josh Quick, Allison Black, James Hadfield, Trevor  
Bedford, Ian Goodfellow, Nick Loman, Kristian Andersen, Michael Wiley, Steve Ahuka-Mundeke, Jean-Jacques  
Muyembe Tamfum

EPI\_ISL\_417954 hCoV-19/Spain/Madrid\_H3\_10/2020 Europe / Spain / Madrid 2020-03-12 Hospital Universitario  
12 de Octubre Hospital Universitario La Paz Elias Dahdouh, Sara González, Fernando Lázaro, Esther Viedma,  
Natalia Stella, Julio García, Juan Carlos Galán, Rafael Cantón, M<sup>a</sup> Dolores Folgueira, Rafael Delgado, Jesús  
Mingorance

EPI\_ISL\_417955 hCoV-19/DRC/191/2020 Africa / Democratic Republic of the Congo / Kinshasa 2020-03-21  
Viral Respiratory Lab, National Institute for Biomedical Research (INRB) Pathogen Sequencing Lab,  
National Institute for Biomedical Research (INRB) Placide Mbala-Kingebeni, Edith Nkwembe, Eddy Kinganda-  
Lusamaki, Amuri Aziza, Catherine Pratt, Matthias Pauthner, Josh Quick, Allison Black, James Hadfield, Trevor  
Bedford, Ian Goodfellow, Nick Loman, Kristian Andersen, Michael Wiley, Steve Ahuka-Mundeke, Jean-Jacques  
Muyembe Tamfum

EPI\_ISL\_417956 hCoV-19/Spain/Madrid\_H5\_34/2020 Europe / Spain / Madrid 2020-03-11 Hospital Universitario  
12 de Octubre Hospital Universitario La Paz Elias Dahdouh, Sara González, Fernando Lázaro, Esther Viedma,  
Natalia Stella, Julio García, Juan Carlos Galán, Rafael Cantón, M<sup>a</sup> Dolores Folgueira, Rafael Delgado, Jesús  
Mingorance

EPI\_ISL\_417957 hCoV-19/Spain/Madrid\_H7\_36/2020 Europe / Spain / Madrid 2020-03-12 Hospital Universitario  
12 de Octubre Hospital Universitario La Paz Elias Dahdouh, Sara González, Fernando Lázaro, Esther Viedma,  
Natalia Stella, Julio García, Juan Carlos Galán, Rafael Cantón, M<sup>a</sup> Dolores Folgueira, Rafael Delgado, Jesús  
Mingorance

EPI\_ISL\_417958 hCoV-19/USA/UT-010/2020 North America / USA / Utah 2020-03-10 Utah Public Health  
Laboratory Utah Public Health Laboratory Erin Young, Kelly Oakeson

EPI\_ISL\_417960 hCoV-19/USA/UT-012/2020 North America / USA / Utah 2020-03-12 Utah Public Health  
Laboratory Utah Public Health Laboratory Erin Young, Kelly Oakeson

EPI\_ISL\_417961 hCoV-19/Spain/Madrid\_H9\_38/2020 Europe / Spain / Madrid 2020-03-12 Hospital Universitario  
12 de Octubre Hospital Universitario La Paz Elias Dahdouh, Sara González, Fernando Lázaro, Esther Viedma,  
Natalia Stella, Julio García, Juan Carlos Galán, Rafael Cantón, M<sup>a</sup> Dolores Folgueira, Rafael Delgado, Jesús  
Mingorance

EPI\_ISL\_417963 hCoV-19/Spain/Madrid\_H10\_39/2020 Europe / Spain / Madrid 2020-03-12 Hospital  
Universitario 12 de Octubre Hospital Universitario La Paz Elias Dahdouh, Sara González, Fernando Lázaro,  
Esther Viedma, Natalia Stella, Julio García, Juan Carlos Galán, Rafael Cantón, M<sup>a</sup> Dolores Folgueira, Rafael  
Delgado, Jesús Mingorance

EPI\_ISL\_417964 hCoV-19/USA/UT-014/2020 North America / USA / Utah 2020-03-13 Utah Public Health  
Laboratory Utah Public Health Laboratory Erin Young, Kelly Oakeson

EPI\_ISL\_417966 hCoV-19/USA/UT-016/2020 North America / USA / Utah 2020-03-13 Utah Public Health  
Laboratory Utah Public Health Laboratory Erin Young, Kelly Oakeson

EPI\_ISL\_417967 hCoV-19/Spain/Madrid\_H11\_40/2020 Europe / Spain / Madrid 2020-03-12 Hospital  
Universitario 12 de Octubre Hospital Universitario La Paz Elias Dahdouh, Sara González, Fernando Lázaro,  
Esther Viedma, Natalia Stella, Julio García, Juan Carlos Galán, Rafael Cantón, M<sup>a</sup> Dolores Folgueira, Rafael  
Delgado, Jesús Mingorance

EPI\_ISL\_417969 hCoV-19/Spain/Madrid\_LP10\_12/2020 Europe / Spain / Madrid 2020-03-09 Hospital  
Universitario La Paz Hospital Universitario La Paz Elias Dahdouh, Sara González, Fernando Lázaro, Esther  
Viedma, Natalia Stella, Julio García, Juan Carlos Galán, Rafael Cantón, M<sup>a</sup> Dolores Folgueira, Rafael Delgado,  
Jesús Mingorance

EPI\_ISL\_417971 hCoV-19/USA/UT-028/2020 North America / USA / Utah 2020-03-19 Utah Public Health  
Laboratory Utah Public Health Laboratory Erin Young, Kelly Oakeson

EPI\_ISL\_417972 hCoV-19/Spain/Madrid\_LP12\_21/2020 Europe / Spain / Madrid 2020-03-09 Hospital  
Universitario La Paz Hospital Universitario La Paz Elias Dahdouh, Sara González, Fernando Lázaro, Esther

|                                                                                                                                            |                                  |                                   |            |                                                                                |
|--------------------------------------------------------------------------------------------------------------------------------------------|----------------------------------|-----------------------------------|------------|--------------------------------------------------------------------------------|
| Viedma, Natalia Stella, Julio García, Juan Carlos Galán, Rafael Cantón, M <sup>a</sup> Dolores Folgueira, Rafael Delgado, Jesús Mingorance |                                  |                                   |            |                                                                                |
| EPI_ISL_417973                                                                                                                             | hCoV-19/USA/UT-031/2020          | North America / USA / Utah        | 2020-03-19 | Utah Public Health Laboratory                                                  |
| EPI_ISL_417974                                                                                                                             | hCoV-19/USA/UT-032/2020          | North America / USA / Utah        | 2020-03-19 | Utah Public Health Laboratory                                                  |
| EPI_ISL_417975                                                                                                                             | hCoV-19/Spain/Madrid_LP14_3/2020 | Europe / Spain / Madrid           | 2020-03-09 | Hospital Universitario La Paz                                                  |
| EPI_ISL_417976                                                                                                                             | hCoV-19/USA/UT-033/2020          | North America / USA / Utah        | 2020-03-19 | Utah Public Health Laboratory                                                  |
| EPI_ISL_417977                                                                                                                             | hCoV-19/USA/UT-034/2020          | North America / USA / Utah        | 2020-03-20 | Utah Public Health Laboratory                                                  |
| EPI_ISL_417978                                                                                                                             | hCoV-19/Spain/Madrid_LP15_4/2020 | Europe / Spain / Madrid           | 2020-03-09 | Hospital Universitario La Paz                                                  |
| EPI_ISL_417979                                                                                                                             | hCoV-19/Spain/Madrid_R2_15/2020  | Europe / Spain / Madrid           | 2020-03-03 | Hospital Universitario Ramón y Cajal                                           |
| EPI_ISL_417980                                                                                                                             | hCoV-19/Spain/Madrid_R5_8/2020   | Europe / Spain / Madrid           | 2020-03-03 | Hospital Universitario Ramón y Cajal                                           |
| EPI_ISL_417981                                                                                                                             | hCoV-19/Spain/Madrid_R10_33/2020 | Europe / Spain / Madrid           | 2020-03-02 | Hospital Universitario Ramón y Cajal                                           |
| EPI_ISL_417986                                                                                                                             | hCoV-19/Portugal/PT0001b/2020    | Europe / Portugal                 | 2020-03-03 | Centro Hospitalar e Universitario de Sao Joao, Porto                           |
| EPI_ISL_417987                                                                                                                             | hCoV-19/Portugal/PT0003/2020     | Europe / Portugal                 | 2020-03-03 | Centro Hospitalar e Universitario de Sao Joao, Porto                           |
| EPI_ISL_417988                                                                                                                             | hCoV-19/Portugal/PT0004/2020     | Europe / Portugal                 | 2020-03-05 | CHULC - H Curry Cabral                                                         |
| EPI_ISL_417989                                                                                                                             | hCoV-19/Portugal/PT0005/2020     | Europe / Portugal                 | 2020-03-04 | Centro Hospitalar e Universitario de Sao Joao, Porto                           |
| EPI_ISL_417990                                                                                                                             | hCoV-19/Portugal/PT0006a/2020    | Europe / Portugal                 | 2020-03-06 | CHULC - H Curry Cabral                                                         |
| EPI_ISL_417991                                                                                                                             | hCoV-19/Portugal/PT0006b/2020    | Europe / Portugal                 | 2020-03-08 | CHULC - H Curry Cabral                                                         |
| EPI_ISL_417992                                                                                                                             | hCoV-19/Portugal/PT0007/2020     | Europe / Portugal                 | 2020-03-07 | CHULC - H D Estefania                                                          |
| EPI_ISL_417993                                                                                                                             | hCoV-19/Portugal/PT0008/2020     | Europe / Portugal                 | 2020-03-08 | CHULC - H D Estefania                                                          |
| EPI_ISL_417994                                                                                                                             | hCoV-19/Portugal/PT0009/2020     | Europe / Portugal                 | 2020-03-08 | CHULC - H Curry Cabral                                                         |
| EPI_ISL_417995                                                                                                                             | hCoV-19/Portugal/PT0010/2020     | Europe / Portugal                 | 2020-03-08 | CHULC - H Curry Cabral                                                         |
| EPI_ISL_417996                                                                                                                             | hCoV-19/Portugal/PT0011/2020     | Europe / Portugal                 | 2020-03-08 | CHULC - H Curry Cabral                                                         |
| EPI_ISL_417997                                                                                                                             | hCoV-19/Portugal/PT0012/2020     | Europe / Portugal                 | 2020-03-07 | Centro Hospital do Porto, E.P.E. - H. Geral de Santo Antonio                   |
| EPI_ISL_417998                                                                                                                             | hCoV-19/Portugal/PT0013/2020     | Europe / Portugal                 | 2020-03-08 | Centro Hospital do Porto, E.P.E. - H. Geral de Santo Antonio                   |
| EPI_ISL_417999                                                                                                                             | hCoV-19/Portugal/PT0014/2020     | Europe / Portugal                 | 2020-03-07 | Centro Hospital do Porto, E.P.E. - H. Geral de Santo Antonio                   |
| EPI_ISL_418700                                                                                                                             | hCoV-19/England/20124013202/2020 | Europe / United Kingdom / England | 2020-03-17 | Respiratory Virus Unit, Microbiology Services Colindale, Public Health England |
| EPI_ISL_418701                                                                                                                             | hCoV-19/England/20124020402/2020 | Europe / United Kingdom / England | 2020-03-17 | Respiratory Virus Unit, Microbiology Services Colindale, Public Health England |
| EPI_ISL_418702                                                                                                                             | hCoV-19/England/20124020802/2020 | Europe / United Kingdom / England | 2020-03-16 | Respiratory Virus Unit, Microbiology Services Colindale, Public Health England |







|                                                                    |                |                                 |                                                  |            |                                                                    |
|--------------------------------------------------------------------|----------------|---------------------------------|--------------------------------------------------|------------|--------------------------------------------------------------------|
| Cécile Meex, Pierrette Melin, Marie-Pierre Hayette, Vincent Bours. | EPI_ISL_421196 | hCoV-19/Belgium/ULG-10018/2020  | Europe / Belgium / Liège                         | 2020-03-30 | Department of Clinical Microbiology                                |
| Cécile Meex, Pierrette Melin, Marie-Pierre Hayette, Vincent Bours. | EPI_ISL_421198 | hCoV-19/Belgium/ULG-10024/2020  | Europe / Belgium / Liège                         | 2020-03-30 | Department of Clinical Microbiology                                |
| Cécile Meex, Pierrette Melin, Marie-Pierre Hayette, Vincent Bours. | EPI_ISL_421200 | hCoV-19/Belgium/ULG-10026/2020  | Europe / Belgium / Liège                         | 2020-03-31 | Department of Clinical Microbiology                                |
| Cécile Meex, Pierrette Melin, Marie-Pierre Hayette, Vincent Bours. | EPI_ISL_421201 | hCoV-19/Belgium/ULG-10027/2020  | Europe / Belgium / Liège                         | 2020-03-31 | Department of Clinical Microbiology                                |
| Cécile Meex, Pierrette Melin, Marie-Pierre Hayette, Vincent Bours. | EPI_ISL_421202 | hCoV-19/Belgium/ULG-10028/2020  | Europe / Belgium / Liège                         | 2020-03-30 | Department of Clinical Microbiology                                |
| Cécile Meex, Pierrette Melin, Marie-Pierre Hayette, Vincent Bours. | EPI_ISL_421203 | hCoV-19/Belgium/ULG-10029/2020  | Europe / Belgium / Liège                         | 2020-03-30 | Department of Clinical Microbiology                                |
| Cécile Meex, Pierrette Melin, Marie-Pierre Hayette, Vincent Bours. | EPI_ISL_421204 | hCoV-19/Belgium/ULG-10030/2020  | Europe / Belgium / Liège                         | 2020-03-31 | Department of Clinical Microbiology                                |
| Cécile Meex, Pierrette Melin, Marie-Pierre Hayette, Vincent Bours. | EPI_ISL_421205 | hCoV-19/Belgium/ULG-10031/2020  | Europe / Belgium / Liège                         | 2020-03-31 | Department of Clinical Microbiology                                |
| Cécile Meex, Pierrette Melin, Marie-Pierre Hayette, Vincent Bours. | EPI_ISL_421206 | hCoV-19/Belgium/ULG-10032/2020  | Europe / Belgium / Liège                         | 2020-03-31 | Department of Clinical Microbiology                                |
| Cécile Meex, Pierrette Melin, Marie-Pierre Hayette, Vincent Bours. | EPI_ISL_421207 | hCoV-19/Belgium/ULG-10033/2020  | Europe / Belgium / Liège                         | 2020-03-31 | Department of Clinical Microbiology                                |
| Cécile Meex, Pierrette Melin, Marie-Pierre Hayette, Vincent Bours. | EPI_ISL_421210 | hCoV-19/Belgium/ULG-10043/2020  | Europe / Belgium / Liège                         | 2020-03-31 | Department of Clinical Microbiology                                |
| Cécile Meex, Pierrette Melin, Marie-Pierre Hayette, Vincent Bours. | EPI_ISL_421212 | hCoV-19/Belgium/ULG-10045/2020  | Europe / Belgium / Liège                         | 2020-03-31 | Department of Clinical Microbiology                                |
| Cécile Meex, Pierrette Melin, Marie-Pierre Hayette, Vincent Bours. | EPI_ISL_421213 | hCoV-19/Belgium/ULG-10046/2020  | Europe / Belgium / Liège                         | 2020-03-31 | Department of Clinical Microbiology                                |
| Cécile Meex, Pierrette Melin, Marie-Pierre Hayette, Vincent Bours. | EPI_ISL_421214 | hCoV-19/Belgium/ULG-10047/2020  | Europe / Belgium / Liège                         | 2020-03-30 | Department of Clinical Microbiology                                |
| Cécile Meex, Pierrette Melin, Marie-Pierre Hayette, Vincent Bours. | EPI_ISL_421221 | hCoV-19/Hangzhou/HZCDC6789/2020 | Asia / China / Hangzhou                          | 2020-03-15 | Hangzhou Center for Diseases Control and Prevention                |
| Cécile Meex, Pierrette Melin, Marie-Pierre Hayette, Vincent Bours. | EPI_ISL_421222 | hCoV-19/Hangzhou/HZCDC6706/2020 | Asia / China / Hangzhou                          | 2020-03-14 | Hangzhou Center for Diseases Control and Prevention                |
| Cécile Meex, Pierrette Melin, Marie-Pierre Hayette, Vincent Bours. | EPI_ISL_421224 | hCoV-19/Hangzhou/HZCDC0162/2020 | Asia / China / Hangzhou                          | 2020-01-23 | Hangzhou Center for Diseases Control and Prevention                |
| Cécile Meex, Pierrette Melin, Marie-Pierre Hayette, Vincent Bours. | EPI_ISL_421300 | hCoV-19/USA/WI-UW-42/2020       | North America / USA / Wisconsin / Madison        | 2020-03-18 | University of Wisconsin-Madison AIDS Vaccine Research Laboratories |
| Cécile Meex, Pierrette Melin, Marie-Pierre Hayette, Vincent Bours. | EPI_ISL_421301 | hCoV-19/USA/WI-UW-43/2020       | North America / USA / Wisconsin / Waunakee       | 2020-03-19 | University of Wisconsin-Madison AIDS Vaccine Research Laboratories |
| Cécile Meex, Pierrette Melin, Marie-Pierre Hayette, Vincent Bours. | EPI_ISL_421302 | hCoV-19/USA/WI-UW-44/2020       | North America / USA / Wisconsin / Madison        | 2020-03-17 | University of Wisconsin-Madison AIDS Vaccine Research Laboratories |
| Cécile Meex, Pierrette Melin, Marie-Pierre Hayette, Vincent Bours. | EPI_ISL_421304 | hCoV-19/USA/WI-UW-46/2020       | North America / USA / Wisconsin / Belleville     | 2020-03-22 | University of Wisconsin-Madison AIDS Vaccine Research Laboratories |
| Cécile Meex, Pierrette Melin, Marie-Pierre Hayette, Vincent Bours. | EPI_ISL_421305 | hCoV-19/USA/WI-UW-47/2020       | North America / USA / Wisconsin / Chippewa Falls | 2020-03-19 | University of Wisconsin-Madison AIDS Vaccine Research Laboratories |
| Cécile Meex, Pierrette Melin, Marie-Pierre Hayette, Vincent Bours. | EPI_ISL_421306 | hCoV-19/USA/WI-UW-48/2020       | North America / USA / Wisconsin / DeForest       | 2020-03-25 | University of Wisconsin-Madison AIDS Vaccine Research Laboratories |

|                                                                                                                                                               |                                  |                                                                            |            |
|---------------------------------------------------------------------------------------------------------------------------------------------------------------|----------------------------------|----------------------------------------------------------------------------|------------|
| EPI_ISL_421307                                                                                                                                                | hCoV-19/USA/WI-UW-49/2020        | North America / USA / Wisconsin / Sun Prairie                              | 2020-03-25 |
| University of Wisconsin-Madison AIDS Vaccine Research Laboratories                                                                                            |                                  | University of Wisconsin-Madison AIDS Vaccine Research Laboratories         |            |
| EPI_ISL_421308                                                                                                                                                | hCoV-19/USA/WI-UW-50/2020        | North America / USA / Wisconsin / Brooklyn                                 | 2020-03-25 |
| University of Wisconsin-Madison AIDS Vaccine Research Laboratories                                                                                            |                                  | University of Wisconsin-Madison AIDS Vaccine Research Laboratories         |            |
| EPI_ISL_421309                                                                                                                                                | hCoV-19/USA/WI-UW-51/2020        | North America / USA / Wisconsin / Madison                                  | 2020-03-20 |
| University of Wisconsin-Madison AIDS Vaccine Research Laboratories                                                                                            |                                  | University of Wisconsin-Madison AIDS Vaccine Research Laboratories         |            |
| EPI_ISL_421310                                                                                                                                                | hCoV-19/USA/WI-UW-52/2020        | North America / USA / Wisconsin / Madison                                  | 2020-03-18 |
| University of Wisconsin-Madison AIDS Vaccine Research Laboratories                                                                                            |                                  | University of Wisconsin-Madison AIDS Vaccine Research Laboratories         |            |
| EPI_ISL_421311                                                                                                                                                | hCoV-19/USA/WI-UW-53/2020        | North America / USA / Wisconsin / Madison                                  | 2020-03-18 |
| University of Wisconsin-Madison AIDS Vaccine Research Laboratories                                                                                            |                                  | University of Wisconsin-Madison AIDS Vaccine Research Laboratories         |            |
| EPI_ISL_421312                                                                                                                                                | hCoV-19/USA/WI-UW-54/2020        | North America / USA / Wisconsin / Monona                                   | 2020-03-20 |
| University of Wisconsin-Madison AIDS Vaccine Research Laboratories                                                                                            |                                  | University of Wisconsin-Madison AIDS Vaccine Research Laboratories         |            |
| EPI_ISL_421313                                                                                                                                                | hCoV-19/USA/WI-UW-55/2020        | North America / USA / Wisconsin / Madison                                  | 2020-03-23 |
| University of Wisconsin-Madison AIDS Vaccine Research Laboratories                                                                                            |                                  | University of Wisconsin-Madison AIDS Vaccine Research Laboratories         |            |
| EPI_ISL_421314                                                                                                                                                | hCoV-19/USA/WI-UW-56/2020        | North America / USA / Wisconsin / Waunakee                                 | 2020-03-18 |
| University of Wisconsin-Madison AIDS Vaccine Research Laboratories                                                                                            |                                  | University of Wisconsin-Madison AIDS Vaccine Research Laboratories         |            |
| EPI_ISL_421315                                                                                                                                                | hCoV-19/USA/WI-UW-57/2020        | North America / USA / Wisconsin / Blanchardville                           | 2020-03-19 |
| University of Wisconsin-Madison AIDS Vaccine Research Laboratories                                                                                            |                                  | University of Wisconsin-Madison AIDS Vaccine Research Laboratories         |            |
| EPI_ISL_421316                                                                                                                                                | hCoV-19/USA/WI-UW-58/2020        | North America / USA / Wisconsin / Madison                                  | 2020-03-23 |
| University of Wisconsin-Madison AIDS Vaccine Research Laboratories                                                                                            |                                  | University of Wisconsin-Madison AIDS Vaccine Research Laboratories         |            |
| EPI_ISL_421317                                                                                                                                                | hCoV-19/USA/WI-UW-59/2020        | North America / USA / Wisconsin / DeForest                                 | 2020-03-24 |
| University of Wisconsin-Madison AIDS Vaccine Research Laboratories                                                                                            |                                  | University of Wisconsin-Madison AIDS Vaccine Research Laboratories         |            |
| EPI_ISL_421318                                                                                                                                                | hCoV-19/USA/WI-UW-60/2020        | North America / USA / Wisconsin / Madison                                  | 2020-03-19 |
| University of Wisconsin-Madison AIDS Vaccine Research Laboratories                                                                                            |                                  | University of Wisconsin-Madison AIDS Vaccine Research Laboratories         |            |
| EPI_ISL_421319                                                                                                                                                | hCoV-19/USA/WI-UW-61/2020        | North America / USA / Wisconsin / Stoughton                                | 2020-03-23 |
| University of Wisconsin-Madison AIDS Vaccine Research Laboratories                                                                                            |                                  | University of Wisconsin-Madison AIDS Vaccine Research Laboratories         |            |
| EPI_ISL_421320                                                                                                                                                | hCoV-19/USA/WI-UW-62/2020        | North America / USA / Wisconsin / Madison                                  | 2020-03-25 |
| University of Wisconsin-Madison AIDS Vaccine Research Laboratories                                                                                            |                                  | University of Wisconsin-Madison AIDS Vaccine Research Laboratories         |            |
| EPI_ISL_421321                                                                                                                                                | hCoV-19/USA/WI-UW-63/2020        | North America / USA / Wisconsin / Sun Prairie                              | 2020-03-24 |
| University of Wisconsin-Madison AIDS Vaccine Research Laboratories                                                                                            |                                  | University of Wisconsin-Madison AIDS Vaccine Research Laboratories         |            |
| EPI_ISL_421322                                                                                                                                                | hCoV-19/USA/WI-UW-64/2020        | North America / USA / Wisconsin / Verona                                   | 2020-03-24 |
| University of Wisconsin-Madison AIDS Vaccine Research Laboratories                                                                                            |                                  | University of Wisconsin-Madison AIDS Vaccine Research Laboratories         |            |
| EPI_ISL_421323                                                                                                                                                | hCoV-19/USA/WI-UW-65/2020        | North America / USA / Wisconsin / Madison                                  | 2020-03-22 |
| University of Wisconsin-Madison AIDS Vaccine Research Laboratories                                                                                            |                                  | University of Wisconsin-Madison AIDS Vaccine Research Laboratories         |            |
| EPI_ISL_422435                                                                                                                                                | hCoV-19/Singapore/42/2020        | Asia / Singapore                                                           | 2020-03-31 |
| Laboratory, National Centre for Infectious Diseases                                                                                                           |                                  | National Public Health Laboratory, National Centre for Infectious Diseases |            |
| EPI_ISL_422437                                                                                                                                                | hCoV-19/Italy/VR_20COV21-26/2020 | Europe / Italy / Veneto / Verona                                           | 2020-03-25 |
| ULSS9 Distretto di Bussolengo                                                                                                                                 |                                  | Istituto Zooprofilattico Sperimentale delle Venezie                        |            |
| Alessia Schivo, Annalisa Salviato, Erika Giorgia Quaranta, Gianpiero Zamperin, Ambra Pastori, Bianca Zecchin, Alice Fusaro, Calogero Terregino, Antonia Ricci |                                  | Adelaide Milani,                                                           |            |
| EPI_ISL_422438                                                                                                                                                | hCoV-19/Italy/VR_20COV21-37/2020 | Europe / Italy / Veneto / Verona                                           | 2020-03-25 |
| ULSS9 Distretto di Bussolengo                                                                                                                                 |                                  | Istituto Zooprofilattico Sperimentale delle Venezie                        |            |
| Alessia Schivo, Annalisa Salviato, Erika Giorgia Quaranta, Gianpiero Zamperin, Ambra Pastori, Bianca Zecchin, Alice Fusaro, Calogero Terregino, Antonia Ricci |                                  | Adelaide Milani,                                                           |            |
| EPI_ISL_422453                                                                                                                                                | hCoV-19/USA/WI-GMF-00498/2020    | North America / USA / Wisconsin / Adams County                             | 2020-03-31 |
| Gundersen Molecular Diagnostics Laboratory                                                                                                                    |                                  | Kabara Cancer Research Institute                                           |            |
| Paraic A. Kenny                                                                                                                                               |                                  | Craig S. Richmond &                                                        |            |
| EPI_ISL_422459                                                                                                                                                | hCoV-19/USA/WI-GMF-00557/2020    | North America / USA / Wisconsin / Monroe County                            | 2020-04-02 |
| Gundersen Molecular Diagnostics Laboratory                                                                                                                    |                                  | Kabara Cancer Research Institute                                           |            |
| Paraic A. Kenny                                                                                                                                               |                                  | Craig S. Richmond &                                                        |            |
| EPI_ISL_422461                                                                                                                                                | hCoV-19/USA/WI-GMF-00707/2020    | North America / USA / Iowa / Allamakee County                              | 2020-04-06 |
| Gundersen Molecular Diagnostics Laboratory                                                                                                                    |                                  | Kabara Cancer Research Institute                                           |            |
|                                                                                                                                                               |                                  | Craig S. Richmond,                                                         |            |

Paraic A. Kenny  
EPI\_ISL\_422462 hCoV-19/USA/WI-GMF-00744/2020 North America / USA / Iowa / Winneshiek County 2020-04-03  
Gundersen Molecular Diagnostics Laboratory Kabara Cancer Research Institute Craig S. Richmond,  
Paraic A. Kenny

EPI\_ISL\_422463 hCoV-19/USA/WI-GMF-00588/2020 North America / USA / Minnesota / Winona County 2020-04-06  
Gundersen Molecular Diagnostics Laboratory Kabara Cancer Research Institute Craig S. Richmond,  
Paraic A. Kenny

EPI\_ISL\_422465 hCoV-19/USA/WI-GMF-00441/2020 North America / USA / Wisconsin / Jackson County 2020-  
03-28 Gundersen Molecular Diagnostics Laboratory Kabara Cancer Research Institute Craig S.  
Richmond, Paraic A. Kenny

EPI\_ISL\_422488 hCoV-19/USA/NY-PV09045/2020 North America / USA / New York / Manhattan 2020-03-21  
MSHS Clinical Microbiology Laboratories MSHS Pathogen Surveillance Program Ana S. Gonzalez-Reiche,  
Mitchell Sullivan, Ajay Obla, Gopi Patel, Emilia Sordillo, Melissa Gitman, Alberto Paniz-mondolfi, Matthew  
Hernandez, Shelcie Fabre, Jose Polanco, Zenab Khan, Bremy Albuquerque, Jayeeta Dutta, Juan Soto, Shwetha  
Sridhar Hara, Ying-Chih Wang, Melissa Smith, Robert Sebra, Lisa Miorin, Wen-chun Liu, Randy Albrecht, Judith  
Aberg, Florian Krammer, Adolfo Garcia-Sarstre, Viviana Simon, Harm van Bakel

EPI\_ISL\_422489 hCoV-19/USA/NY-PV09057/2020 North America / USA / New York / Brooklyn 2020-03-21  
MSHS Clinical Microbiology Laboratories MSHS Pathogen Surveillance Program Ana S. Gonzalez-Reiche,  
Mitchell Sullivan, Ajay Obla, Gopi Patel, Emilia Sordillo, Melissa Gitman, Alberto Paniz-mondolfi, Matthew  
Hernandez, Shelcie Fabre, Jose Polanco, Zenab Khan, Bremy Albuquerque, Jayeeta Dutta, Juan Soto, Shwetha  
Sridhar Hara, Ying-Chih Wang, Melissa Smith, Robert Sebra, Lisa Miorin, Wen-chun Liu, Randy Albrecht, Judith  
Aberg, Florian Krammer, Adolfo Garcia-Sarstre, Viviana Simon, Harm van Bakel

EPI\_ISL\_422490 hCoV-19/USA/NY-PV09069/2020 North America / USA / New York / Brooklyn 2020-03-20  
MSHS Clinical Microbiology Laboratories MSHS Pathogen Surveillance Program Ana S. Gonzalez-Reiche,  
Mitchell Sullivan, Ajay Obla, Gopi Patel, Emilia Sordillo, Melissa Gitman, Alberto Paniz-mondolfi, Matthew  
Hernandez, Shelcie Fabre, Jose Polanco, Zenab Khan, Bremy Albuquerque, Jayeeta Dutta, Juan Soto, Shwetha  
Sridhar Hara, Ying-Chih Wang, Melissa Smith, Robert Sebra, Lisa Miorin, Wen-chun Liu, Randy Albrecht, Judith  
Aberg, Florian Krammer, Adolfo Garcia-Sarstre, Viviana Simon, Harm van Bakel

EPI\_ISL\_422491 hCoV-19/USA/NY-PV09115/2020 North America / USA / New York / Nassau County 2020-03-19  
MSHS Clinical Microbiology Laboratories MSHS Pathogen Surveillance Program Ana S. Gonzalez-Reiche,  
Mitchell Sullivan, Ajay Obla, Gopi Patel, Emilia Sordillo, Melissa Gitman, Alberto Paniz-mondolfi, Matthew  
Hernandez, Shelcie Fabre, Jose Polanco, Zenab Khan, Bremy Albuquerque, Jayeeta Dutta, Juan Soto, Shwetha  
Sridhar Hara, Ying-Chih Wang, Melissa Smith, Robert Sebra, Lisa Miorin, Wen-chun Liu, Randy Albrecht, Judith  
Aberg, Florian Krammer, Adolfo Garcia-Sarstre, Viviana Simon, Harm van Bakel

EPI\_ISL\_422492 hCoV-19/USA/NY-PV09116/2020 North America / USA / New York / Nassau County 2020-03-19  
MSHS Clinical Microbiology Laboratories MSHS Pathogen Surveillance Program Ana S. Gonzalez-Reiche,  
Mitchell Sullivan, Ajay Obla, Gopi Patel, Emilia Sordillo, Melissa Gitman, Alberto Paniz-mondolfi, Matthew  
Hernandez, Shelcie Fabre, Jose Polanco, Zenab Khan, Bremy Albuquerque, Jayeeta Dutta, Juan Soto, Shwetha  
Sridhar Hara, Ying-Chih Wang, Melissa Smith, Robert Sebra, Lisa Miorin, Wen-chun Liu, Randy Albrecht, Judith  
Aberg, Florian Krammer, Adolfo Garcia-Sarstre, Viviana Simon, Harm van Bakel

EPI\_ISL\_422494 hCoV-19/USA/NY-PV09119/2020 North America / USA / New York / Manhattan 2020-03-19  
MSHS Clinical Microbiology Laboratories MSHS Pathogen Surveillance Program Ana S. Gonzalez-Reiche,  
Mitchell Sullivan, Ajay Obla, Gopi Patel, Emilia Sordillo, Melissa Gitman, Alberto Paniz-mondolfi, Matthew  
Hernandez, Shelcie Fabre, Jose Polanco, Zenab Khan, Bremy Albuquerque, Jayeeta Dutta, Juan Soto, Shwetha  
Sridhar Hara, Ying-Chih Wang, Melissa Smith, Robert Sebra, Lisa Miorin, Wen-chun Liu, Randy Albrecht, Judith  
Aberg, Florian Krammer, Adolfo Garcia-Sarstre, Viviana Simon, Harm van Bakel

EPI\_ISL\_422495 hCoV-19/USA/NY-PV09120/2020 North America / USA / New York / Brooklyn 2020-03-19  
MSHS Clinical Microbiology Laboratories MSHS Pathogen Surveillance Program Ana S. Gonzalez-Reiche,  
Mitchell Sullivan, Ajay Obla, Gopi Patel, Emilia Sordillo, Melissa Gitman, Alberto Paniz-mondolfi, Matthew  
Hernandez, Shelcie Fabre, Jose Polanco, Zenab Khan, Bremy Albuquerque, Jayeeta Dutta, Juan Soto, Shwetha  
Sridhar Hara, Ying-Chih Wang, Melissa Smith, Robert Sebra, Lisa Miorin, Wen-chun Liu, Randy Albrecht, Judith  
Aberg, Florian Krammer, Adolfo Garcia-Sarstre, Viviana Simon, Harm van Bakel

EPI\_ISL\_422496 hCoV-19/USA/NY-PV09121/2020 North America / USA / New York / Nassau County 2020-03-19  
MSHS Clinical Microbiology Laboratories MSHS Pathogen Surveillance Program Ana S. Gonzalez-Reiche,  
Mitchell Sullivan, Ajay Obla, Gopi Patel, Emilia Sordillo, Melissa Gitman, Alberto Paniz-mondolfi, Matthew  
Hernandez, Shelcie Fabre, Jose Polanco, Zenab Khan, Bremy Albuquerque, Jayeeta Dutta, Juan Soto, Shwetha  
Sridhar Hara, Ying-Chih Wang, Melissa Smith, Robert Sebra, Lisa Miorin, Wen-chun Liu, Randy Albrecht, Judith  
Aberg, Florian Krammer, Adolfo Garcia-Sarstre, Viviana Simon, Harm van Bakel

EPI\_ISL\_422497 hCoV-19/USA/NY-PV09122/2020 North America / USA / New York / Nassau County 2020-03-19  
MSHS Clinical Microbiology Laboratories MSHS Pathogen Surveillance Program Ana S. Gonzalez-Reiche,  
Mitchell Sullivan, Ajay Obla, Gopi Patel, Emilia Sordillo, Melissa Gitman, Alberto Paniz-mondolfi, Matthew  
Hernandez, Shelcie Fabre, Jose Polanco, Zenab Khan, Bremy Albuquerque, Jayeeta Dutta, Juan Soto, Shwetha  
Sridhar Hara, Ying-Chih Wang, Melissa Smith, Robert Sebra, Lisa Miorin, Wen-chun Liu, Randy Albrecht, Judith  
Aberg, Florian Krammer, Adolfo Garcia-Sarstre, Viviana Simon, Harm van Bakel

EPI\_ISL\_422498 hCoV-19/USA/NY-PV09123/2020 North America / USA / New York / Brooklyn 2020-03-19  
MSHS Clinical Microbiology Laboratories MSHS Pathogen Surveillance Program Ana S. Gonzalez-Reiche,  
Mitchell Sullivan, Ajay Obla, Gopi Patel, Emilia Sordillo, Melissa Gitman, Alberto Paniz-mondolfi, Matthew  
Hernandez, Shelcie Fabre, Jose Polanco, Zenab Khan, Bremy Albuquerque, Jayeeta Dutta, Juan Soto, Shwetha  
Sridhar Hara, Ying-Chih Wang, Melissa Smith, Robert Sebra, Lisa Miorin, Wen-chun Liu, Randy Albrecht, Judith  
Aberg, Florian Krammer, Adolfo Garcia-Sarstre, Viviana Simon, Harm van Bakel









Sridhar Hara, Ying-Chih Wang, Melissa Smith, Robert Sebra, Lisa Miorin, Wen-chun Liu, Randy Albrecht, Judith Aberg, Florian Krammer, Adolfo Garcia-Sarstre, Viviana Simon, Harm van Bakel  
EPI\_ISL\_422551 hCoV-19/USA/NY-PV09195/2020 North America / USA / New York / Bronx 2020-03-20 MSHS  
Clinical Microbiology Laboratories MSMS Pathogen Surveillance Program Ana S. Gonzalez-Reiche, Mitchell Sullivan, Ajay Obla, Gopi Patel, Emilia Sordillo, Melissa Gitman, Alberto Paniz-mondolfi, Matthew Hernandez, Shelcie Fabre, Jose Polanco, Zenab Khan, Bremy Albuquerque, Jayeeta Dutta, Juan Soto, Shwetha Sridhar Hara, Ying-Chih Wang, Melissa Smith, Robert Sebra, Lisa Miorin, Wen-chun Liu, Randy Albrecht, Judith Aberg, Florian Krammer, Adolfo Garcia-Sarstre, Viviana Simon, Harm van Bakel  
EPI\_ISL\_422552 hCoV-19/USA/NY-PV09197/2020 North America / USA / New York / Manhattan 2020-03-20 MSMS Clinical Microbiology Laboratories MSMS Pathogen Surveillance Program Ana S. Gonzalez-Reiche, Mitchell Sullivan, Ajay Obla, Gopi Patel, Emilia Sordillo, Melissa Gitman, Alberto Paniz-mondolfi, Matthew Hernandez, Shelcie Fabre, Jose Polanco, Zenab Khan, Bremy Albuquerque, Jayeeta Dutta, Juan Soto, Shwetha Sridhar Hara, Ying-Chih Wang, Melissa Smith, Robert Sebra, Lisa Miorin, Wen-chun Liu, Randy Albrecht, Judith Aberg, Florian Krammer, Adolfo Garcia-Sarstre, Viviana Simon, Harm van Bakel  
EPI\_ISL\_422553 hCoV-19/USA/NY-PV09198/2020 North America / USA / New York / Manhattan 2020-03-20 MSMS Clinical Microbiology Laboratories MSMS Pathogen Surveillance Program Ana S. Gonzalez-Reiche, Mitchell Sullivan, Ajay Obla, Gopi Patel, Emilia Sordillo, Melissa Gitman, Alberto Paniz-mondolfi, Matthew Hernandez, Shelcie Fabre, Jose Polanco, Zenab Khan, Bremy Albuquerque, Jayeeta Dutta, Juan Soto, Shwetha Sridhar Hara, Ying-Chih Wang, Melissa Smith, Robert Sebra, Lisa Miorin, Wen-chun Liu, Randy Albrecht, Judith Aberg, Florian Krammer, Adolfo Garcia-Sarstre, Viviana Simon, Harm van Bakel  
EPI\_ISL\_422554 hCoV-19/USA/NY-PV09199/2020 North America / USA / New York / Brooklyn 2020-03-21 MSMS Clinical Microbiology Laboratories MSMS Pathogen Surveillance Program Ana S. Gonzalez-Reiche, Mitchell Sullivan, Ajay Obla, Gopi Patel, Emilia Sordillo, Melissa Gitman, Alberto Paniz-mondolfi, Matthew Hernandez, Shelcie Fabre, Jose Polanco, Zenab Khan, Bremy Albuquerque, Jayeeta Dutta, Juan Soto, Shwetha Sridhar Hara, Ying-Chih Wang, Melissa Smith, Robert Sebra, Lisa Miorin, Wen-chun Liu, Randy Albrecht, Judith Aberg, Florian Krammer, Adolfo Garcia-Sarstre, Viviana Simon, Harm van Bakel  
EPI\_ISL\_422555 hCoV-19/USA/NY-PV09200/2020 North America / USA / New York / Manhattan 2020-03-22 MSMS Clinical Microbiology Laboratories MSMS Pathogen Surveillance Program Ana S. Gonzalez-Reiche, Mitchell Sullivan, Ajay Obla, Gopi Patel, Emilia Sordillo, Melissa Gitman, Alberto Paniz-mondolfi, Matthew Hernandez, Shelcie Fabre, Jose Polanco, Zenab Khan, Bremy Albuquerque, Jayeeta Dutta, Juan Soto, Shwetha Sridhar Hara, Ying-Chih Wang, Melissa Smith, Robert Sebra, Lisa Miorin, Wen-chun Liu, Randy Albrecht, Judith Aberg, Florian Krammer, Adolfo Garcia-Sarstre, Viviana Simon, Harm van Bakel  
EPI\_ISL\_422600 hCoV-19/Netherlands/NA\_291/2020 Europe / Netherlands 2020-04-01 Dutch COVID-19 response team Erasmus Medical Center Bas Oude Munnink, David Nieuwenhuijse, Reina Sikkema, Claudia Schapendonk, Irina Chestakova, Anne van der Linden, Theo Bestebroer, Stefan van Nieuwkoop, Mark Pronk, Pascal Lexmond, Corien Swaan, Manon Haverkate, Madelief Mollers, Mart Stein, Sandra Kengne Kamga Mobou, Jeroen van Kampen, Jolanda Voermans, Aura Timen, Corine GeurtsvanKessel, Annemiek van der Eijk, Richard Molenkamp, Marion Koopmans, on behalf of the Dutch national COVID-19 response team.  
EPI\_ISL\_422601 hCoV-19/Netherlands/NA\_292/2020 Europe / Netherlands 2020-04-01 Dutch COVID-19 response team Erasmus Medical Center Bas Oude Munnink, David Nieuwenhuijse, Reina Sikkema, Claudia Schapendonk, Irina Chestakova, Anne van der Linden, Theo Bestebroer, Stefan van Nieuwkoop, Mark Pronk, Pascal Lexmond, Corien Swaan, Manon Haverkate, Madelief Mollers, Mart Stein, Sandra Kengne Kamga Mobou, Jeroen van Kampen, Jolanda Voermans, Aura Timen, Corine GeurtsvanKessel, Annemiek van der Eijk, Richard Molenkamp, Marion Koopmans, on behalf of the Dutch national COVID-19 response team.  
EPI\_ISL\_422602 hCoV-19/Netherlands/NA\_293/2020 Europe / Netherlands 2020-04-01 Dutch COVID-19 response team Erasmus Medical Center Bas Oude Munnink, David Nieuwenhuijse, Reina Sikkema, Claudia Schapendonk, Irina Chestakova, Anne van der Linden, Theo Bestebroer, Stefan van Nieuwkoop, Mark Pronk, Pascal Lexmond, Corien Swaan, Manon Haverkate, Madelief Mollers, Mart Stein, Sandra Kengne Kamga Mobou, Jeroen van Kampen, Jolanda Voermans, Aura Timen, Corine GeurtsvanKessel, Annemiek van der Eijk, Richard Molenkamp, Marion Koopmans, on behalf of the Dutch national COVID-19 response team.  
EPI\_ISL\_422603 hCoV-19/Netherlands/NA\_294/2020 Europe / Netherlands 2020-04-01 Dutch COVID-19 response team Erasmus Medical Center Bas Oude Munnink, David Nieuwenhuijse, Reina Sikkema, Claudia Schapendonk, Irina Chestakova, Anne van der Linden, Theo Bestebroer, Stefan van Nieuwkoop, Mark Pronk, Pascal Lexmond, Corien Swaan, Manon Haverkate, Madelief Mollers, Mart Stein, Sandra Kengne Kamga Mobou, Jeroen van Kampen, Jolanda Voermans, Aura Timen, Corine GeurtsvanKessel, Annemiek van der Eijk, Richard Molenkamp, Marion Koopmans, on behalf of the Dutch national COVID-19 response team.  
EPI\_ISL\_422604 hCoV-19/Netherlands/NA\_295/2020 Europe / Netherlands 2020-04-01 Dutch COVID-19 response team Erasmus Medical Center Bas Oude Munnink, David Nieuwenhuijse, Reina Sikkema, Claudia Schapendonk, Irina Chestakova, Anne van der Linden, Theo Bestebroer, Stefan van Nieuwkoop, Mark Pronk, Pascal Lexmond, Corien Swaan, Manon Haverkate, Madelief Mollers, Mart Stein, Sandra Kengne Kamga Mobou, Jeroen van Kampen, Jolanda Voermans, Aura Timen, Corine GeurtsvanKessel, Annemiek van der Eijk, Richard Molenkamp, Marion Koopmans, on behalf of the Dutch national COVID-19 response team.  
EPI\_ISL\_422605 hCoV-19/Netherlands/NA\_296/2020 Europe / Netherlands 2020-04-01 Dutch COVID-19 response team Erasmus Medical Center Bas Oude Munnink, David Nieuwenhuijse, Reina Sikkema, Claudia Schapendonk, Irina Chestakova, Anne van der Linden, Theo Bestebroer, Stefan van Nieuwkoop, Mark Pronk, Pascal Lexmond, Corien Swaan, Manon Haverkate, Madelief Mollers, Mart Stein, Sandra Kengne Kamga Mobou, Jeroen van Kampen, Jolanda Voermans, Aura Timen, Corine GeurtsvanKessel, Annemiek van der Eijk, Richard Molenkamp, Marion Koopmans, on behalf of the Dutch national COVID-19 response team.  
EPI\_ISL\_422606 hCoV-19/Netherlands/NA\_297/2020 Europe / Netherlands 2020-04-01 Dutch COVID-19 response team Erasmus Medical Center Bas Oude Munnink, David Nieuwenhuijse, Reina Sikkema, Claudia Schapendonk,





EPI\_ISL\_422622 hCoV-19/Netherlands/NA\_313/2020 Europe / Netherlands 2020-04-02 Dutch COVID-19 response team Erasmus Medical Center Bas Oude Munnink, David Nieuwenhuijse, Reina Sikkema, Claudia Schapendonk, Irina Chestakova, Anne van der Linden, Theo Bestebroer, Stefan van Nieuwkoop, Mark Pronk, Pascal Lexmond, Corien Swaan, Manon Haverkate, Madelief Mollers, Mart Stein, Sandra Kengne Kamga Mobou, Jeroen van Kampen, Jolanda Voermans, Aura Timen, Corine GeurtsvanKessel, Annemiek van der Eijk, Richard Molenkamp, Marion Koopmans, on behalf of the Dutch national COVID-19 response team.

EPI\_ISL\_422623 hCoV-19/Netherlands/NA\_314/2020 Europe / Netherlands 2020-04-02 Dutch COVID-19 response team Erasmus Medical Center Bas Oude Munnink, David Nieuwenhuijse, Reina Sikkema, Claudia Schapendonk, Irina Chestakova, Anne van der Linden, Theo Bestebroer, Stefan van Nieuwkoop, Mark Pronk, Pascal Lexmond, Corien Swaan, Manon Haverkate, Madelief Mollers, Mart Stein, Sandra Kengne Kamga Mobou, Jeroen van Kampen, Jolanda Voermans, Aura Timen, Corine GeurtsvanKessel, Annemiek van der Eijk, Richard Molenkamp, Marion Koopmans, on behalf of the Dutch national COVID-19 response team.

EPI\_ISL\_422625 hCoV-19/Netherlands/NA\_316/2020 Europe / Netherlands 2020-04-02 Dutch COVID-19 response team Erasmus Medical Center Bas Oude Munnink, David Nieuwenhuijse, Reina Sikkema, Claudia Schapendonk, Irina Chestakova, Anne van der Linden, Theo Bestebroer, Stefan van Nieuwkoop, Mark Pronk, Pascal Lexmond, Corien Swaan, Manon Haverkate, Madelief Mollers, Mart Stein, Sandra Kengne Kamga Mobou, Jeroen van Kampen, Jolanda Voermans, Aura Timen, Corine GeurtsvanKessel, Annemiek van der Eijk, Richard Molenkamp, Marion Koopmans, on behalf of the Dutch national COVID-19 response team.

EPI\_ISL\_422626 hCoV-19/Netherlands/NA\_317/2020 Europe / Netherlands 2020-04-02 Dutch COVID-19 response team Erasmus Medical Center Bas Oude Munnink, David Nieuwenhuijse, Reina Sikkema, Claudia Schapendonk, Irina Chestakova, Anne van der Linden, Theo Bestebroer, Stefan van Nieuwkoop, Mark Pronk, Pascal Lexmond, Corien Swaan, Manon Haverkate, Madelief Mollers, Mart Stein, Sandra Kengne Kamga Mobou, Jeroen van Kampen, Jolanda Voermans, Aura Timen, Corine GeurtsvanKessel, Annemiek van der Eijk, Richard Molenkamp, Marion Koopmans, on behalf of the Dutch national COVID-19 response team.

EPI\_ISL\_422628 hCoV-19/Netherlands/ZuidHolland\_100/2020 Europe / Netherlands / Zuid Holland 2020-03-31 Dutch COVID-19 response team Erasmus Medical Center Bas Oude Munnink, David Nieuwenhuijse, Reina Sikkema, Claudia Schapendonk, Irina Chestakova, Anne van der Linden, Theo Bestebroer, Stefan van Nieuwkoop, Mark Pronk, Pascal Lexmond, Corien Swaan, Manon Haverkate, Madelief Mollers, Mart Stein, Sandra Kengne Kamga Mobou, Jeroen van Kampen, Jolanda Voermans, Aura Timen, Corine GeurtsvanKessel, Annemiek van der Eijk, Richard Molenkamp, Marion Koopmans, on behalf of the Dutch national COVID-19 response team.

EPI\_ISL\_422629 hCoV-19/Netherlands/ZuidHolland\_101/2020 Europe / Netherlands / Zuid Holland 2020-03-31 Dutch COVID-19 response team Erasmus Medical Center Bas Oude Munnink, David Nieuwenhuijse, Reina Sikkema, Claudia Schapendonk, Irina Chestakova, Anne van der Linden, Theo Bestebroer, Stefan van Nieuwkoop, Mark Pronk, Pascal Lexmond, Corien Swaan, Manon Haverkate, Madelief Mollers, Mart Stein, Sandra Kengne Kamga Mobou, Jeroen van Kampen, Jolanda Voermans, Aura Timen, Corine GeurtsvanKessel, Annemiek van der Eijk, Richard Molenkamp, Marion Koopmans, on behalf of the Dutch national COVID-19 response team.

EPI\_ISL\_422630 hCoV-19/Netherlands/ZuidHolland\_94/2020 Europe / Netherlands / Zuid Holland 2020-03-31 Dutch COVID-19 response team Erasmus Medical Center Bas Oude Munnink, David Nieuwenhuijse, Reina Sikkema, Claudia Schapendonk, Irina Chestakova, Anne van der Linden, Theo Bestebroer, Stefan van Nieuwkoop, Mark Pronk, Pascal Lexmond, Corien Swaan, Manon Haverkate, Madelief Mollers, Mart Stein, Sandra Kengne Kamga Mobou, Jeroen van Kampen, Jolanda Voermans, Aura Timen, Corine GeurtsvanKessel, Annemiek van der Eijk, Richard Molenkamp, Marion Koopmans, on behalf of the Dutch national COVID-19 response team.

EPI\_ISL\_422631 hCoV-19/Netherlands/ZuidHolland\_95/2020 Europe / Netherlands / Zuid Holland 2020-03-31 Dutch COVID-19 response team Erasmus Medical Center Bas Oude Munnink, David Nieuwenhuijse, Reina Sikkema, Claudia Schapendonk, Irina Chestakova, Anne van der Linden, Theo Bestebroer, Stefan van Nieuwkoop, Mark Pronk, Pascal Lexmond, Corien Swaan, Manon Haverkate, Madelief Mollers, Mart Stein, Sandra Kengne Kamga Mobou, Jeroen van Kampen, Jolanda Voermans, Aura Timen, Corine GeurtsvanKessel, Annemiek van der Eijk, Richard Molenkamp, Marion Koopmans, on behalf of the Dutch national COVID-19 response team.

EPI\_ISL\_422632 hCoV-19/Netherlands/ZuidHolland\_96/2020 Europe / Netherlands / Zuid Holland 2020-03-30 Dutch COVID-19 response team Erasmus Medical Center Bas Oude Munnink, David Nieuwenhuijse, Reina Sikkema, Claudia Schapendonk, Irina Chestakova, Anne van der Linden, Theo Bestebroer, Stefan van Nieuwkoop, Mark Pronk, Pascal Lexmond, Corien Swaan, Manon Haverkate, Madelief Mollers, Mart Stein, Sandra Kengne Kamga Mobou, Jeroen van Kampen, Jolanda Voermans, Aura Timen, Corine GeurtsvanKessel, Annemiek van der Eijk, Richard Molenkamp, Marion Koopmans, on behalf of the Dutch national COVID-19 response team.

EPI\_ISL\_422633 hCoV-19/Netherlands/ZuidHolland\_97/2020 Europe / Netherlands / Zuid Holland 2020-03-31 Dutch COVID-19 response team Erasmus Medical Center Bas Oude Munnink, David Nieuwenhuijse, Reina Sikkema, Claudia Schapendonk, Irina Chestakova, Anne van der Linden, Theo Bestebroer, Stefan van Nieuwkoop, Mark Pronk, Pascal Lexmond, Corien Swaan, Manon Haverkate, Madelief Mollers, Mart Stein, Sandra Kengne Kamga Mobou, Jeroen van Kampen, Jolanda Voermans, Aura Timen, Corine GeurtsvanKessel, Annemiek van der Eijk, Richard Molenkamp, Marion Koopmans, on behalf of the Dutch national COVID-19 response team.

EPI\_ISL\_422635 hCoV-19/Netherlands/ZuidHolland\_99/2020 Europe / Netherlands / Zuid Holland 2020-03-31 Dutch COVID-19 response team Erasmus Medical Center Bas Oude Munnink, David Nieuwenhuijse, Reina Sikkema, Claudia Schapendonk, Irina Chestakova, Anne van der Linden, Theo Bestebroer, Stefan van Nieuwkoop, Mark Pronk, Pascal Lexmond, Corien Swaan, Manon Haverkate, Madelief Mollers, Mart Stein, Sandra Kengne Kamga Mobou, Jeroen van Kampen, Jolanda Voermans, Aura Timen, Corine GeurtsvanKessel, Annemiek van der Eijk, Richard Molenkamp, Marion Koopmans, on behalf of the Dutch national COVID-19 response team.

EPI\_ISL\_422636 hCoV-19/Czech Republic/2741/2020 Europe / Czech Republic / Prague 2020-03-08 The National Institute of Public Health Center for Epidemiology and Microbiology State Veterinary Institute Prague Alexander Nagy, Helena Jirincova, Klara Labska, Ludmila Novakova, Olga Storkanova, Dusan Trnka, Jaromira Vecerova



Jolanda Voermans, Aura Timen, Corine GeurtsvanKessel, Annemiek van der Eijk, Richard Molenkamp, Marion Koopmans, on behalf of the Dutch national COVID-19 response team.

EPI\_ISL\_422650 hCoV-19/Netherlands/NA\_101/2020 Europe / Netherlands 2020-03-18 Dutch COVID-19 response team  
Erasmus Medical Center Bas Oude Munnink, David Nieuwenhuijse, Reina Sikkema, Claudia Schapendonk, Irina Chestakova, Anne van der Linden, Theo Bestebroer, Stefan van Nieuwkoop, Mark Pronk, Pascal Lexmond, Corien Swaan, Manon Haverkate, Madelief Mollers, Mart Stein, Sandra Kengne Kamga Mobou, Jeroen van Kampen, Jolanda Voermans, Aura Timen, Corine GeurtsvanKessel, Annemiek van der Eijk, Richard Molenkamp, Marion Koopmans, on behalf of the Dutch national COVID-19 response team.

EPI\_ISL\_422651 hCoV-19/Netherlands/NA\_102/2020 Europe / Netherlands 2020-03-18 Dutch COVID-19 response team  
Erasmus Medical Center Bas Oude Munnink, David Nieuwenhuijse, Reina Sikkema, Claudia Schapendonk, Irina Chestakova, Anne van der Linden, Theo Bestebroer, Stefan van Nieuwkoop, Mark Pronk, Pascal Lexmond, Corien Swaan, Manon Haverkate, Madelief Mollers, Mart Stein, Sandra Kengne Kamga Mobou, Jeroen van Kampen, Jolanda Voermans, Aura Timen, Corine GeurtsvanKessel, Annemiek van der Eijk, Richard Molenkamp, Marion Koopmans, on behalf of the Dutch national COVID-19 response team.

EPI\_ISL\_422652 hCoV-19/Netherlands/NA\_103/2020 Europe / Netherlands 2020-03-18 Dutch COVID-19 response team  
Erasmus Medical Center Bas Oude Munnink, David Nieuwenhuijse, Reina Sikkema, Claudia Schapendonk, Irina Chestakova, Anne van der Linden, Theo Bestebroer, Stefan van Nieuwkoop, Mark Pronk, Pascal Lexmond, Corien Swaan, Manon Haverkate, Madelief Mollers, Mart Stein, Sandra Kengne Kamga Mobou, Jeroen van Kampen, Jolanda Voermans, Aura Timen, Corine GeurtsvanKessel, Annemiek van der Eijk, Richard Molenkamp, Marion Koopmans, on behalf of the Dutch national COVID-19 response team.

EPI\_ISL\_422653 hCoV-19/Netherlands/NA\_104/2020 Europe / Netherlands 2020-03-18 Dutch COVID-19 response team  
Erasmus Medical Center Bas Oude Munnink, David Nieuwenhuijse, Reina Sikkema, Claudia Schapendonk, Irina Chestakova, Anne van der Linden, Theo Bestebroer, Stefan van Nieuwkoop, Mark Pronk, Pascal Lexmond, Corien Swaan, Manon Haverkate, Madelief Mollers, Mart Stein, Sandra Kengne Kamga Mobou, Jeroen van Kampen, Jolanda Voermans, Aura Timen, Corine GeurtsvanKessel, Annemiek van der Eijk, Richard Molenkamp, Marion Koopmans, on behalf of the Dutch national COVID-19 response team.

EPI\_ISL\_423202 hCoV-19/England/201360052/2020 Europe / United Kingdom / England 2020-03-24  
Respiratory Virus Unit, Microbiology Services Colindale, Public Health England Respiratory Virus Unit, Microbiology Services Colindale, Public Health England Monica Galiano, Shahjahan Miah, Angie Lackenby, Omolola Akinbami, Tiina Talts, Leena Bhaw, Richard Myers, Steven Platt, Kirstin Edwards, Jonathan Hubb, Joanna Ellis, Maria Zambon

EPI\_ISL\_423203 hCoV-19/England/201360053/2020 Europe / United Kingdom / England 2020-03-24  
Respiratory Virus Unit, Microbiology Services Colindale, Public Health England Respiratory Virus Unit, Microbiology Services Colindale, Public Health England Monica Galiano, Shahjahan Miah, Angie Lackenby, Omolola Akinbami, Tiina Talts, Leena Bhaw, Richard Myers, Steven Platt, Kirstin Edwards, Jonathan Hubb, Joanna Ellis, Maria Zambon

EPI\_ISL\_423204 hCoV-19/England/201360055/2020 Europe / United Kingdom / England 2020-03-26  
Respiratory Virus Unit, Microbiology Services Colindale, Public Health England Respiratory Virus Unit, Microbiology Services Colindale, Public Health England Monica Galiano, Shahjahan Miah, Angie Lackenby, Omolola Akinbami, Tiina Talts, Leena Bhaw, Richard Myers, Steven Platt, Kirstin Edwards, Jonathan Hubb, Joanna Ellis, Maria Zambon

EPI\_ISL\_423205 hCoV-19/England/201360057/2020 Europe / United Kingdom / England 2020-03-25  
Respiratory Virus Unit, Microbiology Services Colindale, Public Health England Respiratory Virus Unit, Microbiology Services Colindale, Public Health England Monica Galiano, Shahjahan Miah, Angie Lackenby, Omolola Akinbami, Tiina Talts, Leena Bhaw, Richard Myers, Steven Platt, Kirstin Edwards, Jonathan Hubb, Joanna Ellis, Maria Zambon

EPI\_ISL\_423208 hCoV-19/England/201360069/2020 Europe / United Kingdom / England 2020-03-24  
Respiratory Virus Unit, Microbiology Services Colindale, Public Health England Respiratory Virus Unit, Microbiology Services Colindale, Public Health England Monica Galiano, Shahjahan Miah, Angie Lackenby, Omolola Akinbami, Tiina Talts, Leena Bhaw, Richard Myers, Steven Platt, Kirstin Edwards, Jonathan Hubb, Joanna Ellis, Maria Zambon

EPI\_ISL\_423209 hCoV-19/England/201360071/2020 Europe / United Kingdom / England 2020-03-24  
Respiratory Virus Unit, Microbiology Services Colindale, Public Health England Respiratory Virus Unit, Microbiology Services Colindale, Public Health England Monica Galiano, Shahjahan Miah, Angie Lackenby, Omolola Akinbami, Tiina Talts, Leena Bhaw, Richard Myers, Steven Platt, Kirstin Edwards, Jonathan Hubb, Joanna Ellis, Maria Zambon

EPI\_ISL\_423210 hCoV-19/England/201360075/2020 Europe / United Kingdom / England 2020-03-27  
Respiratory Virus Unit, Microbiology Services Colindale, Public Health England Respiratory Virus Unit, Microbiology Services Colindale, Public Health England Monica Galiano, Shahjahan Miah, Angie Lackenby, Omolola Akinbami, Tiina Talts, Leena Bhaw, Richard Myers, Steven Platt, Kirstin Edwards, Jonathan Hubb, Joanna Ellis, Maria Zambon

EPI\_ISL\_423214 hCoV-19/England/201360119/2020 Europe / United Kingdom / England 2020-03-25  
Respiratory Virus Unit, Microbiology Services Colindale, Public Health England Respiratory Virus Unit, Microbiology Services Colindale, Public Health England Monica Galiano, Shahjahan Miah, Angie Lackenby, Omolola Akinbami, Tiina Talts, Leena Bhaw, Richard Myers, Steven Platt, Kirstin Edwards, Jonathan Hubb, Joanna Ellis, Maria Zambon

EPI\_ISL\_423215 hCoV-19/England/20136012004/2020 Europe / United Kingdom / England 2020-03-25  
Respiratory Virus Unit, Microbiology Services Colindale, Public Health England Respiratory Virus Unit, Microbiology Services Colindale, Public Health England Monica Galiano, Shahjahan Miah, Angie Lackenby, Omolola Akinbami, Tiina Talts, Leena Bhaw, Richard Myers, Steven Platt, Kirstin Edwards, Jonathan Hubb, Joanna Ellis,















Maria Zambon  
 EPI\_ISL\_423973 hCoV-19/England/20129000404/2020 Europe / United Kingdom / England 2020-03-20  
 Respiratory Virus Unit, Microbiology Services Colindale, Public Health England Respiratory Virus Unit,  
 Microbiology Services Colindale, Public Health England Monica Galiano, Shahjahan Miah, Angie Lackenby, Omolola  
 Akinbami, Tiina Talts, Leena Bhaw, Richard Myers, Steven Platt, Kirstin Edwards, Jonathan Hubb, Joanna Ellis,  
 Maria Zambon  
 EPI\_ISL\_423979 hCoV-19/England/20129009304/2020 Europe / United Kingdom / England 2020-03-20  
 Respiratory Virus Unit, Microbiology Services Colindale, Public Health England Respiratory Virus Unit,  
 Microbiology Services Colindale, Public Health England Monica Galiano, Shahjahan Miah, Angie Lackenby, Omolola  
 Akinbami, Tiina Talts, Leena Bhaw, Richard Myers, Steven Platt, Kirstin Edwards, Jonathan Hubb, Joanna Ellis,  
 Maria Zambon  
 EPI\_ISL\_424500 hCoV-19/Iceland/477/2020 Europe / Iceland / Reykjavik 2020-03-20 The National  
 University Hospital of Iceland deCODE genetics Daniel F Gudbjartsson; Agnar Helgason; Hakon Jonsson; Olafur T  
 Magnusson; Pall Melsted; Gudmundur L Norddahl; Jona Saemundsdottir; Asgeir Sigurdsson; Patrick Sulem; Arna B  
 Agustsdottir; Berglind Eiriksdottir; Run Fridriksdottir; Elisabet E Gardarsdottir; Gudmundur Georgsson; Olafia  
 S Gretarsdottir; Kjartan R Gudmundsson; Thora R Gunnarsdottir; Arnaldur Gylfason; Hilma Holm; Brynjar O  
 Jensson; Aslaug Jonasdottir; Kamilla S Josefsdottir; Thordur Kristjansson; Droplaug N Magnusdottir; Louise le  
 Roux; Gudrun Sigmundsdottir; Gardar Sveinbjornsson; Kristin E Sveinsdottir; Maney Sveinsdottir; Emil A  
 Thorarensen; Bjarni Thorbjornsson; Gisli Masson; Ingileif Jonsdottir; Alma Moller; Thorolfur Gudnason; Karl G  
 Kristinsson; Unnur Thorsteinsdottir; Kari Stefansson  
 EPI\_ISL\_424502 hCoV-19/Iceland/479/2020 Europe / Iceland / Reykjavik 2020-03-20 The National  
 University Hospital of Iceland deCODE genetics Daniel F Gudbjartsson; Agnar Helgason; Hakon Jonsson; Olafur T  
 Magnusson; Pall Melsted; Gudmundur L Norddahl; Jona Saemundsdottir; Asgeir Sigurdsson; Patrick Sulem; Arna B  
 Agustsdottir; Berglind Eiriksdottir; Run Fridriksdottir; Elisabet E Gardarsdottir; Gudmundur Georgsson; Olafia  
 S Gretarsdottir; Kjartan R Gudmundsson; Thora R Gunnarsdottir; Arnaldur Gylfason; Hilma Holm; Brynjar O  
 Jensson; Aslaug Jonasdottir; Kamilla S Josefsdottir; Thordur Kristjansson; Droplaug N Magnusdottir; Louise le  
 Roux; Gudrun Sigmundsdottir; Gardar Sveinbjornsson; Kristin E Sveinsdottir; Maney Sveinsdottir; Emil A  
 Thorarensen; Bjarni Thorbjornsson; Gisli Masson; Ingileif Jonsdottir; Alma Moller; Thorolfur Gudnason; Karl G  
 Kristinsson; Unnur Thorsteinsdottir; Kari Stefansson  
 EPI\_ISL\_424503 hCoV-19/Iceland/480/2020 Europe / Iceland / Reykjavik 2020-03-20 The National  
 University Hospital of Iceland deCODE genetics Daniel F Gudbjartsson; Agnar Helgason; Hakon Jonsson; Olafur T  
 Magnusson; Pall Melsted; Gudmundur L Norddahl; Jona Saemundsdottir; Asgeir Sigurdsson; Patrick Sulem; Arna B  
 Agustsdottir; Berglind Eiriksdottir; Run Fridriksdottir; Elisabet E Gardarsdottir; Gudmundur Georgsson; Olafia  
 S Gretarsdottir; Kjartan R Gudmundsson; Thora R Gunnarsdottir; Arnaldur Gylfason; Hilma Holm; Brynjar O  
 Jensson; Aslaug Jonasdottir; Kamilla S Josefsdottir; Thordur Kristjansson; Droplaug N Magnusdottir; Louise le  
 Roux; Gudrun Sigmundsdottir; Gardar Sveinbjornsson; Kristin E Sveinsdottir; Maney Sveinsdottir; Emil A  
 Thorarensen; Bjarni Thorbjornsson; Gisli Masson; Ingileif Jonsdottir; Alma Moller; Thorolfur Gudnason; Karl G  
 Kristinsson; Unnur Thorsteinsdottir; Kari Stefansson  
 EPI\_ISL\_424506 hCoV-19/Iceland/483/2020 Europe / Iceland / Reykjavik 2020-03-20 The National  
 University Hospital of Iceland deCODE genetics Daniel F Gudbjartsson; Agnar Helgason; Hakon Jonsson; Olafur T  
 Magnusson; Pall Melsted; Gudmundur L Norddahl; Jona Saemundsdottir; Asgeir Sigurdsson; Patrick Sulem; Arna B  
 Agustsdottir; Berglind Eiriksdottir; Run Fridriksdottir; Elisabet E Gardarsdottir; Gudmundur Georgsson; Olafia  
 S Gretarsdottir; Kjartan R Gudmundsson; Thora R Gunnarsdottir; Arnaldur Gylfason; Hilma Holm; Brynjar O  
 Jensson; Aslaug Jonasdottir; Kamilla S Josefsdottir; Thordur Kristjansson; Droplaug N Magnusdottir; Louise le  
 Roux; Gudrun Sigmundsdottir; Gardar Sveinbjornsson; Kristin E Sveinsdottir; Maney Sveinsdottir; Emil A  
 Thorarensen; Bjarni Thorbjornsson; Gisli Masson; Ingileif Jonsdottir; Alma Moller; Thorolfur Gudnason; Karl G  
 Kristinsson; Unnur Thorsteinsdottir; Kari Stefansson  
 EPI\_ISL\_424507 hCoV-19/Iceland/484/2020 Europe / Iceland / Reykjavik 2020-03-20 The National  
 University Hospital of Iceland deCODE genetics Daniel F Gudbjartsson; Agnar Helgason; Hakon Jonsson; Olafur T  
 Magnusson; Pall Melsted; Gudmundur L Norddahl; Jona Saemundsdottir; Asgeir Sigurdsson; Patrick Sulem; Arna B  
 Agustsdottir; Berglind Eiriksdottir; Run Fridriksdottir; Elisabet E Gardarsdottir; Gudmundur Georgsson; Olafia  
 S Gretarsdottir; Kjartan R Gudmundsson; Thora R Gunnarsdottir; Arnaldur Gylfason; Hilma Holm; Brynjar O  
 Jensson; Aslaug Jonasdottir; Kamilla S Josefsdottir; Thordur Kristjansson; Droplaug N Magnusdottir; Louise le  
 Roux; Gudrun Sigmundsdottir; Gardar Sveinbjornsson; Kristin E Sveinsdottir; Maney Sveinsdottir; Emil A  
 Thorarensen; Bjarni Thorbjornsson; Gisli Masson; Ingileif Jonsdottir; Alma Moller; Thorolfur Gudnason; Karl G  
 Kristinsson; Unnur Thorsteinsdottir; Kari Stefansson  
 EPI\_ISL\_424508 hCoV-19/Iceland/485/2020 Europe / Iceland / Reykjavik 2020-03-20 The National  
 University Hospital of Iceland deCODE genetics Daniel F Gudbjartsson; Agnar Helgason; Hakon Jonsson; Olafur T  
 Magnusson; Pall Melsted; Gudmundur L Norddahl; Jona Saemundsdottir; Asgeir Sigurdsson; Patrick Sulem; Arna B  
 Agustsdottir; Berglind Eiriksdottir; Run Fridriksdottir; Elisabet E Gardarsdottir; Gudmundur Georgsson; Olafia  
 S Gretarsdottir; Kjartan R Gudmundsson; Thora R Gunnarsdottir; Arnaldur Gylfason; Hilma Holm; Brynjar O  
 Jensson; Aslaug Jonasdottir; Kamilla S Josefsdottir; Thordur Kristjansson; Droplaug N Magnusdottir; Louise le  
 Roux; Gudrun Sigmundsdottir; Gardar Sveinbjornsson; Kristin E Sveinsdottir; Maney Sveinsdottir; Emil A  
 Thorarensen; Bjarni Thorbjornsson; Gisli Masson; Ingileif Jonsdottir; Alma Moller; Thorolfur Gudnason; Karl G  
 Kristinsson; Unnur Thorsteinsdottir; Kari Stefansson  
 EPI\_ISL\_424509 hCoV-19/Iceland/487/2020 Europe / Iceland / Reykjavik 2020-03-20 The National  
 University Hospital of Iceland deCODE genetics Daniel F Gudbjartsson; Agnar Helgason; Hakon Jonsson; Olafur T  
 Magnusson; Pall Melsted; Gudmundur L Norddahl; Jona Saemundsdottir; Asgeir Sigurdsson; Patrick Sulem; Arna B  
 Agustsdottir; Berglind Eiriksdottir; Run Fridriksdottir; Elisabet E Gardarsdottir; Gudmundur Georgsson; Olafia  
 S Gretarsdottir; Kjartan R Gudmundsson; Thora R Gunnarsdottir; Arnaldur Gylfason; Hilma Holm; Brynjar O

















EPI\_ISL\_424577 hCoV-19/Iceland/557/2020 Europe / Iceland / Reykjavik 2020-03-27 The National University Hospital of Iceland deCODE genetics Daniel F Gudbjartsson; Agnar Helgason; Hakon Jonsson; Olafur T Magnusson; Pall Melsted; Gudmundur L Norddahl; Jona Saemundsdottir; Asgeir Sigurdsson; Patrick Sulem; Arna B Agustsdottir; Berglind Eiriksdottir; Run Fridriksdottir; Elisabet E Gardarsdottir; Gudmundur Georgsson; Olafia S Gretarsdottir; Kjartan R Gudmundsson; Thora R Gunnarsdottir; Arnaldur Gylfason; Hilma Holm; Brynjar O Jensson; Aslaug Jonasdottir; Kamilla S Josefsdottir; Thordur Kristjansson; Droplaug N Magnusdottir; Louise le Roux; Gudrun Sigmundsdottir; Gardar Sveinbjornsson; Kristin E Sveinsdottir; Maney Sveinsdottir; Emil A Thorarensen; Bjarni Thorbjornsson; Gisli Masson; Ingileif Jonsdottir; Alma Moller; Thorolfur Gudnason; Karl G Kristinsson; Unnur Thorsteinsdottir; Kari Stefansson

EPI\_ISL\_424578 hCoV-19/Iceland/558/2020 Europe / Iceland / Reykjavik 2020-03-27 The National University Hospital of Iceland deCODE genetics Daniel F Gudbjartsson; Agnar Helgason; Hakon Jonsson; Olafur T Magnusson; Pall Melsted; Gudmundur L Norddahl; Jona Saemundsdottir; Asgeir Sigurdsson; Patrick Sulem; Arna B Agustsdottir; Berglind Eiriksdottir; Run Fridriksdottir; Elisabet E Gardarsdottir; Gudmundur Georgsson; Olafia S Gretarsdottir; Kjartan R Gudmundsson; Thora R Gunnarsdottir; Arnaldur Gylfason; Hilma Holm; Brynjar O Jensson; Aslaug Jonasdottir; Kamilla S Josefsdottir; Thordur Kristjansson; Droplaug N Magnusdottir; Louise le Roux; Gudrun Sigmundsdottir; Gardar Sveinbjornsson; Kristin E Sveinsdottir; Maney Sveinsdottir; Emil A Thorarensen; Bjarni Thorbjornsson; Gisli Masson; Ingileif Jonsdottir; Alma Moller; Thorolfur Gudnason; Karl G Kristinsson; Unnur Thorsteinsdottir; Kari Stefansson

EPI\_ISL\_425823 hCoV-19/Scotland/EDB017/2020 Europe / United Kingdom / Scotland 2020-03-14 Virology Department, Royal Infirmary of Edinburgh, NHS Lothian / School of Biological Sciences, University of Edinburgh / Institute of Genetics and Molecular Medicine, University of Edinburgh COVID-19 Genomics UK (COG-UK) Consortium McHugh M, Dewar R, Rooke S, Gallagher M, Balcaza C, O'Toole A, Hill V, McCrone JT, Colquhoun R, Yu X, Jackson B, Scher E, Rambaut A, Williams TC, Templeton K

EPI\_ISL\_425824 hCoV-19/Scotland/EDB018/2020 Europe / United Kingdom / Scotland 2020-03-12 Virology Department, Royal Infirmary of Edinburgh, NHS Lothian / School of Biological Sciences, University of Edinburgh / Institute of Genetics and Molecular Medicine, University of Edinburgh COVID-19 Genomics UK (COG-UK) Consortium McHugh M, Dewar R, Rooke S, Gallagher M, Balcaza C, O'Toole A, Hill V, McCrone JT, Colquhoun R, Yu X, Jackson B, Scher E, Rambaut A, Williams TC, Templeton K

EPI\_ISL\_425825 hCoV-19/Scotland/EDB019/2020 Europe / United Kingdom / Scotland 2020-03-13 Virology Department, Royal Infirmary of Edinburgh, NHS Lothian / School of Biological Sciences, University of Edinburgh / Institute of Genetics and Molecular Medicine, University of Edinburgh COVID-19 Genomics UK (COG-UK) Consortium McHugh M, Dewar R, Rooke S, Gallagher M, Balcaza C, O'Toole A, Hill V, McCrone JT, Colquhoun R, Yu X, Jackson B, Scher E, Rambaut A, Williams TC, Templeton K

EPI\_ISL\_425826 hCoV-19/Scotland/EDB020/2020 Europe / United Kingdom / Scotland 2020-03-14 Virology Department, Royal Infirmary of Edinburgh, NHS Lothian / School of Biological Sciences, University of Edinburgh / Institute of Genetics and Molecular Medicine, University of Edinburgh COVID-19 Genomics UK (COG-UK) Consortium McHugh M, Dewar R, Rooke S, Gallagher M, Balcaza C, O'Toole A, Hill V, McCrone JT, Colquhoun R, Yu X, Jackson B, Scher E, Rambaut A, Williams TC, Templeton K

EPI\_ISL\_425827 hCoV-19/Scotland/EDB021/2020 Europe / United Kingdom / Scotland 2020-03-13 Virology Department, Royal Infirmary of Edinburgh, NHS Lothian / School of Biological Sciences, University of Edinburgh / Institute of Genetics and Molecular Medicine, University of Edinburgh COVID-19 Genomics UK (COG-UK) Consortium McHugh M, Dewar R, Rooke S, Gallagher M, Balcaza C, O'Toole A, Hill V, McCrone JT, Colquhoun R, Yu X, Jackson B, Scher E, Rambaut A, Williams TC, Templeton K

EPI\_ISL\_425828 hCoV-19/Scotland/EDB022/2020 Europe / United Kingdom / Scotland 2020-03-12 Virology Department, Royal Infirmary of Edinburgh, NHS Lothian / School of Biological Sciences, University of Edinburgh / Institute of Genetics and Molecular Medicine, University of Edinburgh COVID-19 Genomics UK (COG-UK) Consortium McHugh M, Dewar R, Rooke S, Gallagher M, Balcaza C, O'Toole A, Hill V, McCrone JT, Colquhoun R, Yu X, Jackson B, Scher E, Rambaut A, Williams TC, Templeton K

EPI\_ISL\_425829 hCoV-19/Scotland/EDB023/2020 Europe / United Kingdom / Scotland 2020-03-12 Virology Department, Royal Infirmary of Edinburgh, NHS Lothian / School of Biological Sciences, University of Edinburgh / Institute of Genetics and Molecular Medicine, University of Edinburgh COVID-19 Genomics UK (COG-UK) Consortium McHugh M, Dewar R, Rooke S, Gallagher M, Balcaza C, O'Toole A, Hill V, McCrone JT, Colquhoun R, Yu X, Jackson B, Scher E, Rambaut A, Williams TC, Templeton K

EPI\_ISL\_425830 hCoV-19/Scotland/EDB024/2020 Europe / United Kingdom / Scotland 2020-03-12 Virology Department, Royal Infirmary of Edinburgh, NHS Lothian / School of Biological Sciences, University of Edinburgh / Institute of Genetics and Molecular Medicine, University of Edinburgh COVID-19 Genomics UK (COG-UK) Consortium McHugh M, Dewar R, Rooke S, Gallagher M, Balcaza C, O'Toole A, Hill V, McCrone JT, Colquhoun R, Yu X, Jackson B, Scher E, Rambaut A, Williams TC, Templeton K

EPI\_ISL\_425836 hCoV-19/Scotland/EDB030/2020 Europe / United Kingdom / Scotland 2020-03-11 Virology Department, Royal Infirmary of Edinburgh, NHS Lothian / School of Biological Sciences, University of Edinburgh / Institute of Genetics and Molecular Medicine, University of Edinburgh COVID-19 Genomics UK (COG-UK) Consortium McHugh M, Dewar R, Rooke S, Gallagher M, Balcaza C, O'Toole A, Hill V, McCrone JT, Colquhoun R, Yu X, Jackson B, Scher E, Rambaut A, Williams TC, Templeton K

EPI\_ISL\_425839 hCoV-19/Scotland/EDB033/2020 Europe / United Kingdom / Scotland 2020-03-13 Virology Department, Royal Infirmary of Edinburgh, NHS Lothian / School of Biological Sciences, University of Edinburgh / Institute of Genetics and Molecular Medicine, University of Edinburgh COVID-19 Genomics UK (COG-UK) Consortium McHugh M, Dewar R, Rooke S, Gallagher M, Balcaza C, O'Toole A, Hill V, McCrone JT, Colquhoun R, Yu X, Jackson B, Scher E, Rambaut A, Williams TC, Templeton K

EPI\_ISL\_425842 hCoV-19/Scotland/EDB036/2020 Europe / United Kingdom / Scotland 2020-03-11 Virology Department, Royal Infirmary of Edinburgh, NHS Lothian / School of Biological Sciences, University of









Edinburgh / Institute of Genetics and Molecular Medicine, University of Edinburgh COVID-19 Genomics UK  
(COG-UK) Consortium McHugh M, Dewar R, Rooke S, Gallagher M, Balcaza C, O'Toole A, Hill V, McCrone JT,  
Colquhoun R, Yu X, Jackson B, Scher E, Rambaut A, Williams TC, Templeton K  
EPI\_ISL\_426020 hCoV-19/Scotland/EDB561/2020 Europe / United Kingdom / Scotland 2020-04-01  
Virology Department, Royal Infirmary of Edinburgh, NHS Lothian / School of Biological Sciences, University of  
Edinburgh / Institute of Genetics and Molecular Medicine, University of Edinburgh COVID-19 Genomics UK  
(COG-UK) Consortium McHugh M, Dewar R, Rooke S, Gallagher M, Balcaza C, O'Toole A, Hill V, McCrone JT,  
Colquhoun R, Yu X, Jackson B, Scher E, Rambaut A, Williams TC, Templeton K  
EPI\_ISL\_426021 hCoV-19/Scotland/EDB562/2020 Europe / United Kingdom / Scotland 2020-04-01  
Virology Department, Royal Infirmary of Edinburgh, NHS Lothian / School of Biological Sciences, University of  
Edinburgh / Institute of Genetics and Molecular Medicine, University of Edinburgh COVID-19 Genomics UK  
(COG-UK) Consortium McHugh M, Dewar R, Rooke S, Gallagher M, Balcaza C, O'Toole A, Hill V, McCrone JT,  
Colquhoun R, Yu X, Jackson B, Scher E, Rambaut A, Williams TC, Templeton K  
EPI\_ISL\_426023 hCoV-19/Scotland/EDB565/2020 Europe / United Kingdom / Scotland 2020-03-31  
Virology Department, Royal Infirmary of Edinburgh, NHS Lothian / School of Biological Sciences, University of  
Edinburgh / Institute of Genetics and Molecular Medicine, University of Edinburgh COVID-19 Genomics UK  
(COG-UK) Consortium McHugh M, Dewar R, Rooke S, Gallagher M, Balcaza C, O'Toole A, Hill V, McCrone JT,  
Colquhoun R, Yu X, Jackson B, Scher E, Rambaut A, Williams TC, Templeton K  
EPI\_ISL\_426024 hCoV-19/Scotland/EDB566/2020 Europe / United Kingdom / Scotland 2020-03-31  
Virology Department, Royal Infirmary of Edinburgh, NHS Lothian / School of Biological Sciences, University of  
Edinburgh / Institute of Genetics and Molecular Medicine, University of Edinburgh COVID-19 Genomics UK  
(COG-UK) Consortium McHugh M, Dewar R, Rooke S, Gallagher M, Balcaza C, O'Toole A, Hill V, McCrone JT,  
Colquhoun R, Yu X, Jackson B, Scher E, Rambaut A, Williams TC, Templeton K  
EPI\_ISL\_426025 hCoV-19/USA/NY-Wadsworth-10496-01/2020 North America / USA / New York 2020-03-03  
Wadsworth Center, New York State Department.of Health Wadsworth Center, New York State Department.of Health  
Kirsten St. George, Daryl M. Lamson, Sara Griesemer, Jonathan Plitnick, Navjot Singh, Matthew D. Shudt, Erica  
Lasek-Nesselquist  
EPI\_ISL\_426026 hCoV-19/USA/NY-Wadsworth-10528-01/2020 North America / USA / New York 2020-03-03  
Wadsworth Center, New York State Department.of Health Wadsworth Center, New York State Department.of Health  
Kirsten St. George, Daryl M. Lamson, Sara Griesemer, Jonathan Plitnick, Navjot Singh, Matthew D. Shudt, Erica  
Lasek-Nesselquist  
EPI\_ISL\_426027 hCoV-19/USA/NY-Wadsworth-10683-01/2020 North America / USA / New York 2020-03-04  
Wadsworth Center, New York State Department.of Health Wadsworth Center, New York State Department.of Health  
Kirsten St. George, Daryl M. Lamson, Sara Griesemer, Jonathan Plitnick, Navjot Singh, Matthew D. Shudt, Erica  
Lasek-Nesselquist  
EPI\_ISL\_426028 hCoV-19/USA/NY-Wadsworth-10690-01/2020 North America / USA / New York 2020-03-04  
Wadsworth Center, New York State Department.of Health Wadsworth Center, New York State Department.of Health  
Kirsten St. George, Daryl M. Lamson, Sara Griesemer, Jonathan Plitnick, Navjot Singh, Matthew D. Shudt, Erica  
Lasek-Nesselquist  
EPI\_ISL\_426029 hCoV-19/USA/NY-Wadsworth-10695-01/2020 North America / USA / New York 2020-03-04  
Wadsworth Center, New York State Department.of Health Wadsworth Center, New York State Department.of Health  
Kirsten St. George, Daryl M. Lamson, Sara Griesemer, Jonathan Plitnick, Navjot Singh, Matthew D. Shudt, Erica  
Lasek-Nesselquist  
EPI\_ISL\_426030 hCoV-19/USA/NY-Wadsworth-10703-01/2020 North America / USA / New York 2020-03-04  
Wadsworth Center, New York State Department.of Health Wadsworth Center, New York State Department.of Health  
Kirsten St. George, Daryl M. Lamson, Sara Griesemer, Jonathan Plitnick, Navjot Singh, Matthew D. Shudt, Erica  
Lasek-Nesselquist  
EPI\_ISL\_426031 hCoV-19/USA/NY-Wadsworth-10704-01/2020 North America / USA / New York 2020-03-04  
Wadsworth Center, New York State Department.of Health Wadsworth Center, New York State Department.of Health  
Kirsten St. George, Daryl M. Lamson, Sara Griesemer, Jonathan Plitnick, Navjot Singh, Matthew D. Shudt, Erica  
Lasek-Nesselquist  
EPI\_ISL\_426032 hCoV-19/USA/NY-Wadsworth-10707-01/2020 North America / USA / New York 2020-03-04  
Wadsworth Center, New York State Department.of Health Wadsworth Center, New York State Department.of Health  
Kirsten St. George, Daryl M. Lamson, Sara Griesemer, Jonathan Plitnick, Navjot Singh, Matthew D. Shudt, Erica  
Lasek-Nesselquist  
EPI\_ISL\_426033 hCoV-19/USA/NY-Wadsworth-10935-01/2020 North America / USA / New York 2020-03-04  
Wadsworth Center, New York State Department.of Health Wadsworth Center, New York State Department.of Health  
Kirsten St. George, Daryl M. Lamson, Sara Griesemer, Jonathan Plitnick, Navjot Singh, Matthew D. Shudt, Erica  
Lasek-Nesselquist  
EPI\_ISL\_426034 hCoV-19/USA/NY-Wadsworth-10955-01/2020 North America / USA / New York 2020-03-04  
Wadsworth Center, New York State Department.of Health Wadsworth Center, New York State Department.of Health  
Kirsten St. George, Daryl M. Lamson, Sara Griesemer, Jonathan Plitnick, Navjot Singh, Matthew D. Shudt, Erica  
Lasek-Nesselquist  
EPI\_ISL\_426035 hCoV-19/USA/NY-Wadsworth-10957-02/2020 North America / USA / New York 2020-03-04  
Wadsworth Center, New York State Department.of Health Wadsworth Center, New York State Department.of Health  
Kirsten St. George, Daryl M. Lamson, Sara Griesemer, Jonathan Plitnick, Navjot Singh, Matthew D. Shudt, Erica  
Lasek-Nesselquist  
EPI\_ISL\_426036 hCoV-19/USA/NY-Wadsworth-10958-01/2020 North America / USA / New York 2020-03-04  
Wadsworth Center, New York State Department.of Health Wadsworth Center, New York State Department.of Health  
Kirsten St. George, Daryl M. Lamson, Sara Griesemer, Jonathan Plitnick, Navjot Singh, Matthew D. Shudt, Erica



|                                                                                                                                 |                |                                        |                                                                                                                 |            |    |
|---------------------------------------------------------------------------------------------------------------------------------|----------------|----------------------------------------|-----------------------------------------------------------------------------------------------------------------|------------|----|
| Lasek-Nesselquist                                                                                                               | EPI_ISL_426037 | hCoV-19/USA/NY-Wadsworth-10999-01/2020 | North America / USA / New York                                                                                  | 2020-03-05 |    |
| Wadsworth Center, New York State Department.of Health                                                                           |                |                                        | Wadsworth Center, New York State Department.of Health                                                           |            |    |
| Kirsten St. George, Daryl M. Lamson, Sara Griesemer, Jonathan Plitnick, Navjot Singh, Matthew D. Shudt, Erica Lasek-Nesselquist |                |                                        |                                                                                                                 |            |    |
| Lasek-Nesselquist                                                                                                               | EPI_ISL_426038 | hCoV-19/USA/NY-Wadsworth-11000-01/2020 | North America / USA / New York                                                                                  | 2020-03-05 |    |
| Wadsworth Center, New York State Department.of Health                                                                           |                |                                        | Wadsworth Center, New York State Department.of Health                                                           |            |    |
| Kirsten St. George, Daryl M. Lamson, Sara Griesemer, Jonathan Plitnick, Navjot Singh, Matthew D. Shudt, Erica Lasek-Nesselquist |                |                                        |                                                                                                                 |            |    |
| Lasek-Nesselquist                                                                                                               | EPI_ISL_426039 | hCoV-19/USA/NY-Wadsworth-11003-01/2020 | North America / USA / New York                                                                                  | 2020-03-05 |    |
| Wadsworth Center, New York State Department.of Health                                                                           |                |                                        | Wadsworth Center, New York State Department.of Health                                                           |            |    |
| Kirsten St. George, Daryl M. Lamson, Sara Griesemer, Jonathan Plitnick, Navjot Singh, Matthew D. Shudt, Erica Lasek-Nesselquist |                |                                        |                                                                                                                 |            |    |
| Lasek-Nesselquist                                                                                                               | EPI_ISL_426040 | hCoV-19/USA/NY-Wadsworth-11017-01/2020 | North America / USA / New York                                                                                  | 2020-03-05 |    |
| Wadsworth Center, New York State Department.of Health                                                                           |                |                                        | Wadsworth Center, New York State Department.of Health                                                           |            |    |
| Kirsten St. George, Daryl M. Lamson, Sara Griesemer, Jonathan Plitnick, Navjot Singh, Matthew D. Shudt, Erica Lasek-Nesselquist |                |                                        |                                                                                                                 |            |    |
| Lasek-Nesselquist                                                                                                               | EPI_ISL_426041 | hCoV-19/USA/NY-Wadsworth-11180-01/2020 | North America / USA / New York                                                                                  | 2020-03-06 |    |
| Wadsworth Center, New York State Department.of Health                                                                           |                |                                        | Wadsworth Center, New York State Department.of Health                                                           |            |    |
| Kirsten St. George, Daryl M. Lamson, Sara Griesemer, Jonathan Plitnick, Navjot Singh, Matthew D. Shudt, Erica Lasek-Nesselquist |                |                                        |                                                                                                                 |            |    |
| Lasek-Nesselquist                                                                                                               | EPI_ISL_426042 | hCoV-19/USA/NY-Wadsworth-11202-01/2020 | North America / USA / New York                                                                                  | 2020-03-06 |    |
| Wadsworth Center, New York State Department.of Health                                                                           |                |                                        | Wadsworth Center, New York State Department.of Health                                                           |            |    |
| Kirsten St. George, Daryl M. Lamson, Sara Griesemer, Jonathan Plitnick, Navjot Singh, Matthew D. Shudt, Erica Lasek-Nesselquist |                |                                        |                                                                                                                 |            |    |
| Lasek-Nesselquist                                                                                                               | EPI_ISL_426043 | hCoV-19/USA/NY-Wadsworth-11284-01/2020 | North America / USA / New York                                                                                  | 2020-03-06 |    |
| Wadsworth Center, New York State Department.of Health                                                                           |                |                                        | Wadsworth Center, New York State Department.of Health                                                           |            |    |
| Kirsten St. George, Daryl M. Lamson, Sara Griesemer, Jonathan Plitnick, Navjot Singh, Matthew D. Shudt, Erica Lasek-Nesselquist |                |                                        |                                                                                                                 |            |    |
| Lasek-Nesselquist                                                                                                               | EPI_ISL_426044 | hCoV-19/USA/NY-Wadsworth-11291-01/2020 | North America / USA / New York                                                                                  | 2020-03-06 |    |
| Wadsworth Center, New York State Department.of Health                                                                           |                |                                        | Wadsworth Center, New York State Department.of Health                                                           |            |    |
| Kirsten St. George, Daryl M. Lamson, Sara Griesemer, Jonathan Plitnick, Navjot Singh, Matthew D. Shudt, Erica Lasek-Nesselquist |                |                                        |                                                                                                                 |            |    |
| Lasek-Nesselquist                                                                                                               | EPI_ISL_426045 | hCoV-19/USA/NY-Wadsworth-11344-01/2020 | North America / USA / New York                                                                                  | 2020-03-06 |    |
| Wadsworth Center, New York State Department.of Health                                                                           |                |                                        | Wadsworth Center, New York State Department.of Health                                                           |            |    |
| Kirsten St. George, Daryl M. Lamson, Sara Griesemer, Jonathan Plitnick, Navjot Singh, Matthew D. Shudt, Erica Lasek-Nesselquist |                |                                        |                                                                                                                 |            |    |
| Lasek-Nesselquist                                                                                                               | EPI_ISL_426046 | hCoV-19/USA/NY-Wadsworth-11353-01/2020 | North America / USA / New York                                                                                  | 2020-03-06 |    |
| Wadsworth Center, New York State Department.of Health                                                                           |                |                                        | Wadsworth Center, New York State Department.of Health                                                           |            |    |
| Kirsten St. George, Daryl M. Lamson, Sara Griesemer, Jonathan Plitnick, Navjot Singh, Matthew D. Shudt, Erica Lasek-Nesselquist |                |                                        |                                                                                                                 |            |    |
| Lasek-Nesselquist                                                                                                               | EPI_ISL_426047 | hCoV-19/USA/NY-Wadsworth-11354-01/2020 | North America / USA / New York                                                                                  | 2020-03-06 |    |
| Wadsworth Center, New York State Department.of Health                                                                           |                |                                        | Wadsworth Center, New York State Department.of Health                                                           |            |    |
| Kirsten St. George, Daryl M. Lamson, Sara Griesemer, Jonathan Plitnick, Navjot Singh, Matthew D. Shudt, Erica Lasek-Nesselquist |                |                                        |                                                                                                                 |            |    |
| Lasek-Nesselquist                                                                                                               | EPI_ISL_426048 | hCoV-19/USA/NY-Wadsworth-11379-01/2020 | North America / USA / New York                                                                                  | 2020-03-06 |    |
| Wadsworth Center, New York State Department.of Health                                                                           |                |                                        | Wadsworth Center, New York State Department.of Health                                                           |            |    |
| Kirsten St. George, Daryl M. Lamson, Sara Griesemer, Jonathan Plitnick, Navjot Singh, Matthew D. Shudt, Erica Lasek-Nesselquist |                |                                        |                                                                                                                 |            |    |
| Lasek-Nesselquist                                                                                                               | EPI_ISL_426049 | hCoV-19/USA/NY-Wadsworth-11380-01/2020 | North America / USA / New York                                                                                  | 2020-03-06 |    |
| Wadsworth Center, New York State Department.of Health                                                                           |                |                                        | Wadsworth Center, New York State Department.of Health                                                           |            |    |
| Kirsten St. George, Daryl M. Lamson, Sara Griesemer, Jonathan Plitnick, Navjot Singh, Matthew D. Shudt, Erica Lasek-Nesselquist |                |                                        |                                                                                                                 |            |    |
| Lasek-Nesselquist                                                                                                               | EPI_ISL_426050 | hCoV-19/USA/NY-Wadsworth-11666-01/2020 | North America / USA / New York                                                                                  | 2020-03-08 |    |
| Wadsworth Center, New York State Department.of Health                                                                           |                |                                        | Wadsworth Center, New York State Department.of Health                                                           |            |    |
| Kirsten St. George, Daryl M. Lamson, Sara Griesemer, Jonathan Plitnick, Navjot Singh, Matthew D. Shudt, Erica Lasek-Nesselquist |                |                                        |                                                                                                                 |            |    |
| Lasek-Nesselquist                                                                                                               | EPI_ISL_426051 | hCoV-19/Czech Republic/2282/2020       | Europe / Czech Republic / Prague                                                                                | 2020-03-20 |    |
| Laboratory of Molecular Genetics, 2nd Faculty of Medicine, Charles University in Prague, Prague, Czech Republic                 |                |                                        | Laboratory of Molecular Genetics, 2nd Faculty of Medicine, Charles University in Prague, Prague, Czech Republic |            |    |
| Laboratory of Molecular Genetics, 2nd Faculty of Medicine, Charles University in Prague, Prague, Czech Republic                 |                |                                        |                                                                                                                 |            |    |
| Lenka Kramná, Kateřina Poláčková, Ondřej Cinek                                                                                  |                |                                        |                                                                                                                 |            |    |
| Lasek-Nesselquist                                                                                                               | EPI_ISL_426052 | hCoV-19/USA/CT-UW-4344/2020            | North America / USA / Connecticut                                                                               | 2020-03-30 | UW |
| Virology Lab                                                                                                                    |                |                                        | UW Virology Lab Pavitra Roychoudhury, Hong Xie, Keith Jerome, Alexander Greninger                               |            |    |
|                                                                                                                                 |                |                                        |                                                                                                                 |            |    |
| Lasek-Nesselquist                                                                                                               | EPI_ISL_426053 | hCoV-19/USA/CT-UW-4346/2020            | North America / USA / Connecticut                                                                               | 2020-03-30 | UW |
| Virology Lab                                                                                                                    |                |                                        | UW Virology Lab Pavitra Roychoudhury, Hong Xie, Keith Jerome, Alexander Greninger                               |            |    |
|                                                                                                                                 |                |                                        |                                                                                                                 |            |    |
| Lasek-Nesselquist                                                                                                               | EPI_ISL_426054 | hCoV-19/USA/CT-UW-4347/2020            | North America / USA / Connecticut                                                                               | 2020-03-30 | UW |
| Virology Lab                                                                                                                    |                |                                        | UW Virology Lab Pavitra Roychoudhury, Hong Xie, Keith Jerome, Alexander Greninger                               |            |    |
|                                                                                                                                 |                |                                        |                                                                                                                 |            |    |
| Lasek-Nesselquist                                                                                                               | EPI_ISL_426055 | hCoV-19/USA/CT-UW-4366/2020            | North America / USA / Connecticut                                                                               | 2020-03-30 | UW |
| Virology Lab                                                                                                                    |                |                                        | UW Virology Lab Pavitra Roychoudhury, Hong Xie, Keith Jerome, Alexander Greninger                               |            |    |
|                                                                                                                                 |                |                                        |                                                                                                                 |            |    |
| Lasek-Nesselquist                                                                                                               | EPI_ISL_426056 | hCoV-19/USA/CT-UW-4372/2020            | North America / USA / Connecticut                                                                               | 2020-03-30 | UW |
| Virology Lab                                                                                                                    |                |                                        | UW Virology Lab Pavitra Roychoudhury, Hong Xie, Keith Jerome, Alexander Greninger                               |            |    |
|                                                                                                                                 |                |                                        |                                                                                                                 |            |    |



|                                                                                       |                                                                                                                                                                                                      |                                                                                                                                                                                                      |            |    |
|---------------------------------------------------------------------------------------|------------------------------------------------------------------------------------------------------------------------------------------------------------------------------------------------------|------------------------------------------------------------------------------------------------------------------------------------------------------------------------------------------------------|------------|----|
| Virology Lab                                                                          | UW Virology Lab Pavitra Roychoudhury, Hong Xie, Keith Jerome, Alexander Greninger                                                                                                                    |                                                                                                                                                                                                      |            |    |
| EPI_ISL_426094                                                                        | hCoV-19/USA/WA-UW-2137/2020                                                                                                                                                                          | North America / USA / Washington                                                                                                                                                                     | 2020-03-24 | UW |
| Virology Lab                                                                          | UW Virology Lab Pavitra Roychoudhury, Hong Xie, Keith Jerome, Alexander Greninger                                                                                                                    |                                                                                                                                                                                                      |            |    |
| EPI_ISL_426095                                                                        | hCoV-19/USA/WA-UW-2140/2020                                                                                                                                                                          | North America / USA / Washington                                                                                                                                                                     | 2020-03-25 | UW |
| Virology Lab                                                                          | UW Virology Lab Pavitra Roychoudhury, Hong Xie, Keith Jerome, Alexander Greninger                                                                                                                    |                                                                                                                                                                                                      |            |    |
| EPI_ISL_426096                                                                        | hCoV-19/USA/WA-UW-2141/2020                                                                                                                                                                          | North America / USA / Washington                                                                                                                                                                     | 2020-03-25 | UW |
| Virology Lab                                                                          | UW Virology Lab Pavitra Roychoudhury, Hong Xie, Keith Jerome, Alexander Greninger                                                                                                                    |                                                                                                                                                                                                      |            |    |
| EPI_ISL_426097                                                                        | hCoV-19/USA/WA-UW-2142/2020                                                                                                                                                                          | North America / USA / Washington                                                                                                                                                                     | 2020-03-25 | UW |
| Virology Lab                                                                          | UW Virology Lab Pavitra Roychoudhury, Hong Xie, Keith Jerome, Alexander Greninger                                                                                                                    |                                                                                                                                                                                                      |            |    |
| EPI_ISL_426098                                                                        | hCoV-19/USA/WA-UW-2144/2020                                                                                                                                                                          | North America / USA / Washington                                                                                                                                                                     | 2020-03-25 | UW |
| Virology Lab                                                                          | UW Virology Lab Pavitra Roychoudhury, Hong Xie, Keith Jerome, Alexander Greninger                                                                                                                    |                                                                                                                                                                                                      |            |    |
| EPI_ISL_426099                                                                        | hCoV-19/USA/WA-UW-2145/2020                                                                                                                                                                          | North America / USA / Washington                                                                                                                                                                     | 2020-03-25 | UW |
| Virology Lab                                                                          | UW Virology Lab Pavitra Roychoudhury, Hong Xie, Keith Jerome, Alexander Greninger                                                                                                                    |                                                                                                                                                                                                      |            |    |
| EPI_ISL_427300                                                                        | hCoV-19/Brazil/RJ-477/2020                                                                                                                                                                           | South America / Brazil / Rio de Janeiro / Rio de Janeiro                                                                                                                                             |            |    |
| 2020-03-11                                                                            | Instituto Oswaldo Cruz FIOCRUZ - Laboratory of Respiratory Viruses and Measles (LVRs)                                                                                                                |                                                                                                                                                                                                      |            |    |
| Instituto Oswaldo Cruz FIOCRUZ - Laboratory of Respiratory Viruses and Measles (LVRs) | Paola Resende, Fernando Motta, Luciana Appolinario, Sunando Roy, Aline Mattos, Milene Miranda, Cristiana Garcia, Braulia Caetano, Maria Ogrzewalska, Priscila Born, Jonathan Lopes, Marilda Siqueira |                                                                                                                                                                                                      |            |    |
| EPI_ISL_427301                                                                        | hCoV-19/Brazil/RJ-477i/2020                                                                                                                                                                          | South America / Brazil / Rio de Janeiro / Rio de Janeiro                                                                                                                                             |            |    |
| 2020-03-11                                                                            | Instituto Oswaldo Cruz FIOCRUZ - Laboratory of Respiratory Viruses and Measles (LVRs)                                                                                                                |                                                                                                                                                                                                      |            |    |
| Instituto Oswaldo Cruz FIOCRUZ - Laboratory of Respiratory Viruses and Measles (LVRs) | Paola Resende, Fernando Motta, Luciana Appolinario, Sunando Roy, Aline Mattos, Milene Miranda, Cristiana Garcia, Braulia Caetano, Maria Ogrzewalska, Priscila Born, Jonathan Lopes, Marilda Siqueira |                                                                                                                                                                                                      |            |    |
| EPI_ISL_427302                                                                        | hCoV-19/Brazil/RJ-763/2020                                                                                                                                                                           | South America / Brazil / Rio de Janeiro / Rio de Janeiro                                                                                                                                             |            |    |
| 2020-03-20                                                                            | Instituto Oswaldo Cruz FIOCRUZ - Laboratory of Respiratory Viruses and Measles (LVRs)                                                                                                                |                                                                                                                                                                                                      |            |    |
| Instituto Oswaldo Cruz FIOCRUZ - Laboratory of Respiratory Viruses and Measles (LVRs) | Paola Resende, Fernando Motta, Luciana Appolinario, Sunando Roy, Aline Mattos, Milene Miranda, Cristiana Garcia, Braulia Caetano, Maria Ogrzewalska, Priscila Born, Jonathan Lopes, Marilda Siqueira |                                                                                                                                                                                                      |            |    |
| EPI_ISL_427303                                                                        | hCoV-19/Brazil/RJ-818/2020                                                                                                                                                                           | South America / Brazil / Rio de Janeiro / Rio de Janeiro                                                                                                                                             |            |    |
| 2020-03-25                                                                            | Instituto Oswaldo Cruz FIOCRUZ - Laboratory of Respiratory Viruses and Measles (LVRs)                                                                                                                |                                                                                                                                                                                                      |            |    |
| Instituto Oswaldo Cruz FIOCRUZ - Laboratory of Respiratory Viruses and Measles (LVRs) | Paola Resende, Fernando Motta, Luciana Appolinario, Sunando Roy, Aline Mattos, Milene Miranda, Cristiana Garcia, Braulia Caetano, Maria Ogrzewalska, Priscila Born, Jonathan Lopes, Marilda Siqueira |                                                                                                                                                                                                      |            |    |
| EPI_ISL_427304                                                                        | hCoV-19/Brazil/RJ-872/2020                                                                                                                                                                           | South America / Brazil / Rio de Janeiro / Rio de Janeiro                                                                                                                                             |            |    |
| 2020-03-26                                                                            | Instituto Oswaldo Cruz FIOCRUZ - Laboratory of Respiratory Viruses and Measles (LVRs)                                                                                                                |                                                                                                                                                                                                      |            |    |
| Instituto Oswaldo Cruz FIOCRUZ - Laboratory of Respiratory Viruses and Measles (LVRs) | Paola Resende, Fernando Motta, Luciana Appolinario, Sunando Roy, Aline Mattos, Milene Miranda, Cristiana Garcia, Braulia Caetano, Maria Ogrzewalska, Priscila Born, Jonathan Lopes, Marilda Siqueira |                                                                                                                                                                                                      |            |    |
| EPI_ISL_427305                                                                        | hCoV-19/Brazil/SC-766/2020                                                                                                                                                                           | South America / Brazil / Santa Catarina / Joinville                                                                                                                                                  | 2020-03-10 |    |
| LACEN-SC - Laboratorio Central de Santa Catarina                                      | Instituto Oswaldo Cruz FIOCRUZ - Laboratory of Respiratory Viruses and Measles (LVRs)                                                                                                                | Paola Resende, Fernando Motta, Luciana Appolinario, Sunando Roy, Aline Mattos, Milene Miranda, Cristiana Garcia, Braulia Caetano, Maria Ogrzewalska, Priscila Born, Jonathan Lopes, Marilda Siqueira |            |    |
| EPI_ISL_427306                                                                        | hCoV-19/Brazil/SC-769/2020                                                                                                                                                                           | South America / Brazil / Santa Catarina / Florianopolis                                                                                                                                              | 2020-03-10 |    |
| LACEN-SC - Laboratorio Central de Santa Catarina                                      | Instituto Oswaldo Cruz FIOCRUZ - Laboratory of Respiratory Viruses and Measles (LVRs)                                                                                                                | Paola Resende, Fernando Motta, Luciana Appolinario, Sunando Roy, Aline Mattos, Milene Miranda, Cristiana Garcia, Braulia Caetano, Maria Ogrzewalska, Priscila Born, Jonathan Lopes, Marilda Siqueira |            |    |
| EPI_ISL_427307                                                                        | hCoV-19/Russia/StPetersburg-RII4144S/2020                                                                                                                                                            | Europe / Russia / Saint-Petersburg                                                                                                                                                                   | 2020-03-20 |    |
| WHO National Influenza Centre Russian Federation                                      | WHO National Influenza Centre Russian Federation                                                                                                                                                     | Andrey Komissarov, Artem Fadeev, Mariia Sergeeva, Anna Ivanova, Daria Danilenko                                                                                                                      |            |    |
| EPI_ISL_427308                                                                        | hCoV-19/Russia/StPetersburg-RII4307V/2020                                                                                                                                                            | Europe / Russia / Saint-Petersburg                                                                                                                                                                   | 2020-03-24 |    |
| WHO National Influenza Centre Russian Federation                                      | WHO National Influenza Centre Russian Federation                                                                                                                                                     | Andrey Komissarov, Artem Fadeev, Mariia Sergeeva, Anna Ivanova, Daria Danilenko                                                                                                                      |            |    |
| EPI_ISL_427309                                                                        | hCoV-19/Russia/StPetersburg-RII4308V/2020                                                                                                                                                            | Europe / Russia / Saint-Petersburg                                                                                                                                                                   | 2020-03-24 |    |
| WHO National Influenza Centre Russian Federation                                      | WHO National Influenza Centre Russian Federation                                                                                                                                                     | Andrey Komissarov, Artem Fadeev, Mariia Sergeeva, Anna Ivanova, Daria Danilenko                                                                                                                      |            |    |
| EPI_ISL_427310                                                                        | hCoV-19/Russia/StPetersburg-RII4382V/2020                                                                                                                                                            | Europe / Russia / Saint-Petersburg                                                                                                                                                                   | 2020-03-29 |    |
| WHO National Influenza Centre Russian Federation                                      | WHO National Influenza Centre Russian Federation                                                                                                                                                     | Andrey Komissarov, Artem Fadeev, Mariia Sergeeva, Anna Ivanova, Daria Danilenko                                                                                                                      |            |    |
| EPI_ISL_427311                                                                        | hCoV-19/Russia/StPetersburg-RII4384V/2020                                                                                                                                                            | Europe / Russia / Saint-Petersburg                                                                                                                                                                   | 2020-03-29 |    |
| WHO National Influenza Centre Russian Federation                                      | WHO National Influenza Centre Russian Federation                                                                                                                                                     | Andrey Komissarov, Artem Fadeev, Mariia Sergeeva, Anna Ivanova, Daria Danilenko                                                                                                                      |            |    |
| EPI_ISL_427312                                                                        | hCoV-19/Russia/StPetersburg-RII4386V/2020                                                                                                                                                            | Europe / Russia / Saint-Petersburg                                                                                                                                                                   | 2020-03-29 |    |
| WHO National Influenza Centre Russian Federation                                      | WHO National Influenza Centre Russian Federation                                                                                                                                                     | Andrey Komissarov, Artem Fadeev, Mariia Sergeeva, Anna Ivanova, Daria Danilenko                                                                                                                      |            |    |
| EPI_ISL_427313                                                                        | hCoV-19/Russia/StPetersburg-RII4532V/2020                                                                                                                                                            | Europe / Russia / Saint-Petersburg                                                                                                                                                                   | 2020-04-03 |    |
| WHO National Influenza Centre Russian Federation                                      | WHO National Influenza Centre Russian Federation                                                                                                                                                     | Andrey Komissarov, Artem Fadeev, Mariia Sergeeva, Anna Ivanova, Daria Danilenko                                                                                                                      |            |    |
| EPI_ISL_427314                                                                        | hCoV-19/Russia/StPetersburg-RII4546V/2020                                                                                                                                                            | Europe / Russia / Saint-Petersburg                                                                                                                                                                   | 2020-      |    |



|                |                                                                                 |                                    |            |                                                                                                                                                                                                                                                                                                                                     |
|----------------|---------------------------------------------------------------------------------|------------------------------------|------------|-------------------------------------------------------------------------------------------------------------------------------------------------------------------------------------------------------------------------------------------------------------------------------------------------------------------------------------|
| Federation     | Andrey Komissarov, Artem Fadeev, Mariia Sergeeva, Anna Ivanova, Daria Danilenko |                                    |            |                                                                                                                                                                                                                                                                                                                                     |
| EPI_ISL_427339 | hCoV-19/Russia/StPetersburg-RII4332S/2020                                       | Europe / Russia / Saint-Petersburg | 2020-03-25 | WHO National Influenza Centre Russian Federation                                                                                                                                                                                                                                                                                    |
| EPI_ISL_427349 | hCoV-19/Belgium/ULG-10098/2020                                                  | Europe / Belgium / Liege           | 2020-04-06 | Department of Clinical Microbiology GIGA Medical Genomics Keith Durkin, Maria Artesi, Sébastien Bontems, Raphaël Boreux, Cécile Meex, Pierrette Melin, Marie-Pierre Hayette, Vincent Bours.                                                                                                                                         |
| EPI_ISL_427350 | hCoV-19/Belgium/ULG-10099/2020                                                  | Europe / Belgium / Liege           | 2020-04-06 | Department of Clinical Microbiology GIGA Medical Genomics Keith Durkin, Maria Artesi, Sébastien Bontems, Raphaël Boreux, Cécile Meex, Pierrette Melin, Marie-Pierre Hayette, Vincent Bours.                                                                                                                                         |
| EPI_ISL_427351 | hCoV-19/Belgium/ULG-10100/2020                                                  | Europe / Belgium / Liege           | 2020-04-07 | Department of Clinical Microbiology GIGA Medical Genomics Keith Durkin, Maria Artesi, Sébastien Bontems, Raphaël Boreux, Cécile Meex, Pierrette Melin, Marie-Pierre Hayette, Vincent Bours.                                                                                                                                         |
| EPI_ISL_427352 | hCoV-19/Belgium/ULG-10101/2020                                                  | Europe / Belgium / Liege           | 2020-04-06 | Department of Clinical Microbiology GIGA Medical Genomics Keith Durkin, Maria Artesi, Sébastien Bontems, Raphaël Boreux, Cécile Meex, Pierrette Melin, Marie-Pierre Hayette, Vincent Bours.                                                                                                                                         |
| EPI_ISL_427354 | hCoV-19/Belgium/ULG-10103/2020                                                  | Europe / Belgium / Liege           | 2020-04-06 | Department of Clinical Microbiology GIGA Medical Genomics Keith Durkin, Maria Artesi, Sébastien Bontems, Raphaël Boreux, Cécile Meex, Pierrette Melin, Marie-Pierre Hayette, Vincent Bours.                                                                                                                                         |
| EPI_ISL_427357 | hCoV-19/Belgium/ULG-10106/2020                                                  | Europe / Belgium / Liege           | 2020-04-07 | Department of Clinical Microbiology GIGA Medical Genomics Keith Durkin, Maria Artesi, Sébastien Bontems, Raphaël Boreux, Cécile Meex, Pierrette Melin, Marie-Pierre Hayette, Vincent Bours.                                                                                                                                         |
| EPI_ISL_427358 | hCoV-19/Belgium/ULG-10107/2020                                                  | Europe / Belgium / Liege           | 2020-04-06 | Department of Clinical Microbiology GIGA Medical Genomics Keith Durkin, Maria Artesi, Sébastien Bontems, Raphaël Boreux, Cécile Meex, Pierrette Melin, Marie-Pierre Hayette, Vincent Bours.                                                                                                                                         |
| EPI_ISL_427359 | hCoV-19/Belgium/ULG-10108/2020                                                  | Europe / Belgium / Liege           | 2020-04-06 | Department of Clinical Microbiology GIGA Medical Genomics Keith Durkin, Maria Artesi, Sébastien Bontems, Raphaël Boreux, Cécile Meex, Pierrette Melin, Marie-Pierre Hayette, Vincent Bours.                                                                                                                                         |
| EPI_ISL_427364 | hCoV-19/Belgium/ULG-10115/2020                                                  | Europe / Belgium / Liege           | 2020-04-07 | Department of Clinical Microbiology GIGA Medical Genomics Keith Durkin, Maria Artesi, Sébastien Bontems, Raphaël Boreux, Cécile Meex, Pierrette Melin, Marie-Pierre Hayette, Vincent Bours.                                                                                                                                         |
| EPI_ISL_427366 | hCoV-19/Belgium/ULG-10118/2020                                                  | Europe / Belgium / Liege           | 2020-04-07 | Department of Clinical Microbiology GIGA Medical Genomics Keith Durkin, Maria Artesi, Sébastien Bontems, Raphaël Boreux, Cécile Meex, Pierrette Melin, Marie-Pierre Hayette, Vincent Bours.                                                                                                                                         |
| EPI_ISL_427370 | hCoV-19/Belgium/ULG-10122/2020                                                  | Europe / Belgium / Liege           | 2020-04-07 | Department of Clinical Microbiology GIGA Medical Genomics Keith Durkin, Maria Artesi, Sébastien Bontems, Raphaël Boreux, Cécile Meex, Pierrette Melin, Marie-Pierre Hayette, Vincent Bours.                                                                                                                                         |
| EPI_ISL_427371 | hCoV-19/Belgium/ULG-10124/2020                                                  | Europe / Belgium / Liege           | 2020-04-07 | Department of Clinical Microbiology GIGA Medical Genomics Keith Durkin, Maria Artesi, Sébastien Bontems, Raphaël Boreux, Cécile Meex, Pierrette Melin, Marie-Pierre Hayette, Vincent Bours.                                                                                                                                         |
| EPI_ISL_427372 | hCoV-19/Belgium/ULG-10126/2020                                                  | Europe / Belgium / Liege           | 2020-04-07 | Department of Clinical Microbiology GIGA Medical Genomics Keith Durkin, Maria Artesi, Sébastien Bontems, Raphaël Boreux, Cécile Meex, Pierrette Melin, Marie-Pierre Hayette, Vincent Bours.                                                                                                                                         |
| EPI_ISL_427379 | hCoV-19/Belgium/ULG-10134/2020                                                  | Europe / Belgium / Liege           | 2020-04-08 | Department of Clinical Microbiology GIGA Medical Genomics Keith Durkin, Maria Artesi, Sébastien Bontems, Raphaël Boreux, Cécile Meex, Pierrette Melin, Marie-Pierre Hayette, Vincent Bours.                                                                                                                                         |
| EPI_ISL_427385 | hCoV-19/Belgium/ULG-10142/2020                                                  | Europe / Belgium / Liege           | 2020-04-08 | Department of Clinical Microbiology GIGA Medical Genomics Keith Durkin, Maria Artesi, Sébastien Bontems, Raphaël Boreux, Cécile Meex, Pierrette Melin, Marie-Pierre Hayette, Vincent Bours.                                                                                                                                         |
| EPI_ISL_427388 | hCoV-19/Belgium/ULG-10144/2020                                                  | Europe / Belgium / Liege           | 2020-04-07 | Department of Clinical Microbiology GIGA Medical Genomics Keith Durkin, Maria Artesi, Sébastien Bontems, Raphaël Boreux, Cécile Meex, Pierrette Melin, Marie-Pierre Hayette, Vincent Bours.                                                                                                                                         |
| EPI_ISL_427390 | hCoV-19/Belgium/ULG-10125/2020                                                  | Europe / Belgium / Liege           | 2020-04-07 | Department of Clinical Microbiology GIGA Medical Genomics Keith Durkin, Maria Artesi, Sébastien Bontems, Raphaël Boreux, Cécile Meex, Pierrette Melin, Marie-Pierre Hayette, Vincent Bours.                                                                                                                                         |
| EPI_ISL_427391 | hCoV-19/Turkey/GLAB-CoV008/2020                                                 | Europe / Turkey / Istanbul         | 2020-04-13 | Genomic Laboratory (GLAB) (Conjoint lab of Health Directorate of Istanbul and Istanbul Technical University) Genomic Laboratory (GLAB), Istanbul Technical University Ilker Karacan, Tugba Kizilboga Akgun, Bugra Agaoglu, Gizem Alkurt, Jale Yildiz, Betsi Köse, Elifnaz Çelik, Mehtap Aydın, Levent Doganay, Gizem Dinler Doganay |
| EPI_ISL_427392 | hCoV-19/Taiwan/TSGH-05/2020                                                     | Asia / Taiwan / New Taipei City    | 2020-03-14 | TSGH-CP molecular lab TSGH-CP molecular lab Cherng-Lih Perng, Ming-Jr Jian, Chih-Kai Chang, Jung-Chung Lin, Kuo-Ming Yeh, Chien-Wen Chen, Sheng-Kang Chiu, Hsing-Yi Chung, Shih-Hung Tsai, Kuo-Sheng Hung, Tien-Yao Chang, Feng-Yee Chang, Hung-Sheng Shang                                                                         |
| EPI_ISL_427393 | hCoV-19/Taiwan/TSGH-06/2020                                                     | Asia / Taiwan / Taipei             | 2020-03-15 | TSGH-CP molecular lab TSGH-CP molecular lab Cherng-Lih Perng, Ming-Jr Jian, Chih-Kai Chang, Jung-Chung Lin, Kuo-Ming Yeh, Chien-Wen Chen, Sheng-Kang Chiu, Hsing-Yi Chung, Shih-Hung Tsai, Kuo-Sheng Hung, Tien-Yao Chang, Feng-Yee Chang, Hung-Sheng Shang                                                                         |
| EPI_ISL_427394 | hCoV-19/Taiwan/TSGH-07/2020                                                     | Asia / Taiwan / New Taipei City    | 2020-03-22 | TSGH-CP molecular lab TSGH-CP molecular lab Cherng-Lih Perng, Ming-Jr Jian, Chih-Kai Chang, Jung-Chung Lin, Kuo-Ming Yeh, Chien-Wen Chen, Sheng-Kang Chiu, Hsing-Yi Chung, Shih-Hung Tsai, Kuo-Sheng Hung, Tien-Yao Chang,                                                                                                          |

|                                                                                                                                                                                                                                                   |                                     |                                 |            |                                      |
|---------------------------------------------------------------------------------------------------------------------------------------------------------------------------------------------------------------------------------------------------|-------------------------------------|---------------------------------|------------|--------------------------------------|
| Feng-Yee Chang, Hung-Sheng Shang<br>EPI_ISL_427395                                                                                                                                                                                                | hCoV-19/Taiwan/TSGH-08/2020         | Asia / Taiwan / Keelung         | 2020-03-23 | TSGH-CP molecular lab                |
| TSGH-CP molecular lab Cherng-Lih Perng, Ming-Jr Jian, Chih-Kai Chang, Jung-Chung Lin, Kuo-Ming Yeh, Chien-Wen Chen, Sheng-Kang Chiu, Hsing-Yi Chung, Shih-Hung Tsai, Kuo-Sheng Hung, Tien-Yao Chang, Feng-Yee Chang, Hung-Sheng Shang             |                                     |                                 |            |                                      |
| EPI_ISL_427396                                                                                                                                                                                                                                    | hCoV-19/Taiwan/TSGH-09/2020         | Asia / Taiwan / New Taipei City | 2020-03-23 | TSGH-CP molecular lab                |
| TSGH-CP molecular lab Cherng-Lih Perng, Ming-Jr Jian, Chih-Kai Chang, Jung-Chung Lin, Kuo-Ming Yeh, Chien-Wen Chen, Sheng-Kang Chiu, Hsing-Yi Chung, Shih-Hung Tsai, Kuo-Sheng Hung, Tien-Yao Chang, Feng-Yee Chang, Hung-Sheng Shang             |                                     |                                 |            |                                      |
| EPI_ISL_427397                                                                                                                                                                                                                                    | hCoV-19/Taiwan/TSGH-10/2020         | Asia / Taiwan / Taipei          | 2020-03-24 | TSGH-CP molecular lab                |
| TSGH-CP molecular lab Cherng-Lih Perng, Ming-Jr Jian, Chih-Kai Chang, Jung-Chung Lin, Kuo-Ming Yeh, Chien-Wen Chen, Sheng-Kang Chiu, Hsing-Yi Chung, Shih-Hung Tsai, Kuo-Sheng Hung, Tien-Yao Chang, Feng-Yee Chang, Hung-Sheng Shang             |                                     |                                 |            |                                      |
| EPI_ISL_427398                                                                                                                                                                                                                                    | hCoV-19/Taiwan/TSGH-11/2020         | Asia / Taiwan / New Taipei City | 2020-03-25 | TSGH-CP molecular lab                |
| TSGH-CP molecular lab Cherng-Lih Perng, Ming-Jr Jian, Chih-Kai Chang, Jung-Chung Lin, Kuo-Ming Yeh, Chien-Wen Chen, Sheng-Kang Chiu, Hsing-Yi Chung, Shih-Hung Tsai, Kuo-Sheng Hung, Tien-Yao Chang, Feng-Yee Chang, Hung-Sheng Shang             |                                     |                                 |            |                                      |
| EPI_ISL_428670                                                                                                                                                                                                                                    | hCoV-19/Sri Lanka/COV38/2020        | Asia / Sri Lanka                | 2020-03-16 | Centre for Dengue Research           |
| Centre for Dengue Research Chandima Jeewandara, Dinuka Ariyaratne, Laksiri Gomes, Deshni Jayathilaka, Ananda Wijewickrama, Eranga Narangoda, Damayanthi Idampitiya, Neelika Malaige                                                               |                                     |                                 |            |                                      |
| EPI_ISL_428671                                                                                                                                                                                                                                    | hCoV-19/Sri Lanka/COV53/2020        | Asia / Sri Lanka                | 2020-03-10 | Centre for Dengue Research           |
| Centre for Dengue Research Chandima Jeewandara, Dinuka Ariyatane, Laksiri Gomes, Deshni Jayathilaka, Diyanath Ranasinghe, Ananda Wijewickrama, Eranga Narangoda, Damayanthi Idampitiya, Neelika Malavige                                          |                                     |                                 |            |                                      |
| EPI_ISL_428672                                                                                                                                                                                                                                    | hCoV-19/Sri Lanka/COV91/2020        | Asia / Sri Lanka                | 2020-03-19 | Centre for Dengue Research           |
| Centre for Dengue Research Chandima Jeewandara, Dinuka Ariyaratne, Laksiri Gomes, Deshni Jayathilaka, Diyanath Ranasinghe, Ananda Wijewickrama, Eranga Narangoda, Damayanthi Idampitiya, Neelika Malavige                                         |                                     |                                 |            |                                      |
| EPI_ISL_428673                                                                                                                                                                                                                                    | hCoV-19/Sri Lanka/COV486/2020       | Asia / Sri Lanka                | 2020-03-31 | Centre for Dengue Research           |
| Centre for Dengue Research Chandima Jeewandara, Dinuka Ariyaratne, Laksiri Gomes, Deshni Jayathilaka, Diyanath Ranasinghe, Ananda Wijewickrama, Eranga Narangoda, Damayanthi Idampitiya, Neelika Malavige                                         |                                     |                                 |            |                                      |
| EPI_ISL_428674                                                                                                                                                                                                                                    | hCoV-19/Spain/Madrid_LP11_2271/2020 | Europe / Spain / Madrid         | 2020-03-09 | Hospital Universitario La Paz        |
| Hospital Universitario 12 de Octubre Elias Dahdouh, Sara González, Raúl Recio, Fernando Lázaro, Esther Viedma, Natalia Stella, Julio García, Juan Carlos Galán, Rafael Cantón, M <sup>a</sup> Dolores Folgueira, Rafael Delgado, Jesús Mingorance |                                     |                                 |            |                                      |
| EPI_ISL_428675                                                                                                                                                                                                                                    | hCoV-19/Spain/Madrid_LP16_6193/2020 | Europe / Spain / Madrid         | 2020-03-09 | Hospital Universitario La Paz        |
| Hospital Universitario 12 de Octubre Elias Dahdouh, Sara González, Raúl Recio, Fernando Lázaro, Esther Viedma, Natalia Stella, Julio García, Juan Carlos Galán, Rafael Cantón, M <sup>a</sup> Dolores Folgueira, Rafael Delgado, Jesús Mingorance |                                     |                                 |            |                                      |
| EPI_ISL_428676                                                                                                                                                                                                                                    | hCoV-19/Spain/Madrid_LP19_4952/2020 | Europe / Spain / Madrid         | 2020-03-07 | Hospital Universitario La Paz        |
| Hospital Universitario 12 de Octubre Elias Dahdouh, Sara González, Raúl Recio, Fernando Lázaro, Esther Viedma, Natalia Stella, Julio García, Juan Carlos Galán, Rafael Cantón, M <sup>a</sup> Dolores Folgueira, Rafael Delgado, Jesús Mingorance |                                     |                                 |            |                                      |
| EPI_ISL_428677                                                                                                                                                                                                                                    | hCoV-19/Spain/Madrid_LP20_2327/2020 | Europe / Spain / Madrid         | 2020-03-11 | Hospital Universitario La Paz        |
| Hospital Universitario 12 de Octubre Elias Dahdouh, Sara González, Raúl Recio, Fernando Lázaro, Esther Viedma, Natalia Stella, Julio García, Juan Carlos Galán, Rafael Cantón, M <sup>a</sup> Dolores Folgueira, Rafael Delgado, Jesús Mingorance |                                     |                                 |            |                                      |
| EPI_ISL_428678                                                                                                                                                                                                                                    | hCoV-19/Spain/Madrid_LP22_5885/2020 | Europe / Spain / Madrid         | 2020-03-08 | Hospital Universitario La Paz        |
| Hospital Universitario 12 de Octubre Elias Dahdouh, Sara González, Raúl Recio, Fernando Lázaro, Esther Viedma, Natalia Stella, Julio García, Juan Carlos Galán, Rafael Cantón, M <sup>a</sup> Dolores Folgueira, Rafael Delgado, Jesús Mingorance |                                     |                                 |            |                                      |
| EPI_ISL_428679                                                                                                                                                                                                                                    | hCoV-19/Spain/Madrid_LP23_5852/2020 | Europe / Spain / Madrid         | 2020-03-08 | Hospital Universitario La Paz        |
| Hospital Universitario 12 de Octubre Elias Dahdouh, Sara González, Raúl Recio, Fernando Lázaro, Esther Viedma, Natalia Stella, Julio García, Juan Carlos Galán, Rafael Cantón, M <sup>a</sup> Dolores Folgueira, Rafael Delgado, Jesús Mingorance |                                     |                                 |            |                                      |
| EPI_ISL_428680                                                                                                                                                                                                                                    | hCoV-19/Spain/Madrid_LP24_5999/2020 | Europe / Spain / Madrid         | 2020-03-09 | Hospital Universitario La Paz        |
| Hospital Universitario 12 de Octubre Elias Dahdouh, Sara González, Raúl Recio, Fernando Lázaro, Esther Viedma, Natalia Stella, Julio García, Juan Carlos Galán, Rafael Cantón, M <sup>a</sup> Dolores Folgueira, Rafael Delgado, Jesús Mingorance |                                     |                                 |            |                                      |
| EPI_ISL_428681                                                                                                                                                                                                                                    | hCoV-19/Spain/Madrid_LP27_2548/2020 | Europe / Spain / Madrid         | 2020-03-11 | Hospital Universitario La Paz        |
| Hospital Universitario 12 de Octubre Elias Dahdouh, Sara González, Raúl Recio, Fernando Lázaro, Esther Viedma, Natalia Stella, Julio García, Juan Carlos Galán, Rafael Cantón, M <sup>a</sup> Dolores Folgueira, Rafael Delgado, Jesús Mingorance |                                     |                                 |            |                                      |
| EPI_ISL_428682                                                                                                                                                                                                                                    | hCoV-19/Spain/Madrid_LP30_2226/2020 | Europe / Spain / Madrid         | 2020-03-11 | Hospital Universitario La Paz        |
| Hospital Universitario 12 de Octubre Elias Dahdouh, Sara González, Raúl Recio, Fernando Lázaro, Esther Viedma, Natalia Stella, Julio García, Juan Carlos Galán, Rafael Cantón, M <sup>a</sup> Dolores Folgueira, Rafael Delgado, Jesús Mingorance |                                     |                                 |            |                                      |
| EPI_ISL_428683                                                                                                                                                                                                                                    | hCoV-19/Spain/Madrid_H12_13/2020    | Europe / Spain / Madrid         | 2020-03-03 | Hospital Universitario 12 de Octubre |
| Hospital Universitario 12 de Octubre Sara González, Raúl Recio, Elias                                                                                                                                                                             |                                     |                                 |            |                                      |

|                                                                                                                                                                             |                |                                  |                                               |            |                                                                                          |
|-----------------------------------------------------------------------------------------------------------------------------------------------------------------------------|----------------|----------------------------------|-----------------------------------------------|------------|------------------------------------------------------------------------------------------|
| Dahdouh, Fernando Lázaro, Esther Viedma, Natalia Stella, Julio García, Juan Carlos Galán, Rafael Cantón, M <sup>a</sup> Dolores Folgueira, Rafael Delgado, Jesús Mingorance | EPI_ISL_428684 | hCoV-19/Spain/Madrid_H12_20/2020 | Europe / Spain / Madrid                       | 2020-03-27 | Hospital Universitario 12 de Octubre                                                     |
| Dahdouh, Fernando Lázaro, Esther Viedma, Natalia Stella, Julio García, Juan Carlos Galán, Rafael Cantón, M <sup>a</sup> Dolores Folgueira, Rafael Delgado, Jesús Mingorance | EPI_ISL_428686 | hCoV-19/Spain/Madrid_H12_23/2020 | Europe / Spain / Madrid                       | 2020-03-22 | Hospital Universitario 12 de Octubre                                                     |
| Dahdouh, Fernando Lázaro, Esther Viedma, Natalia Stella, Julio García, Juan Carlos Galán, Rafael Cantón, M <sup>a</sup> Dolores Folgueira, Rafael Delgado, Jesús Mingorance | EPI_ISL_428687 | hCoV-19/Spain/Madrid_H12_24/2020 | Europe / Spain / Madrid                       | 2020-03-22 | Hospital Universitario 12 de Octubre                                                     |
| Dahdouh, Fernando Lázaro, Esther Viedma, Natalia Stella, Julio García, Juan Carlos Galán, Rafael Cantón, M <sup>a</sup> Dolores Folgueira, Rafael Delgado, Jesús Mingorance | EPI_ISL_428688 | hCoV-19/Spain/Madrid_H12_25/2020 | Europe / Spain / Madrid                       | 2020-03-22 | Hospital Universitario 12 de Octubre                                                     |
| Dahdouh, Fernando Lázaro, Esther Viedma, Natalia Stella, Julio García, Juan Carlos Galán, Rafael Cantón, M <sup>a</sup> Dolores Folgueira, Rafael Delgado, Jesús Mingorance | EPI_ISL_428689 | hCoV-19/Spain/Madrid_H12_26/2020 | Europe / Spain / Madrid                       | 2020-03-26 | Hospital Universitario 12 de Octubre                                                     |
| Dahdouh, Fernando Lázaro, Esther Viedma, Natalia Stella, Julio García, Juan Carlos Galán, Rafael Cantón, M <sup>a</sup> Dolores Folgueira, Rafael Delgado, Jesús Mingorance | EPI_ISL_428690 | hCoV-19/Spain/Madrid_H12_27/2020 | Europe / Spain / Madrid                       | 2020-03-21 | Hospital Universitario 12 de Octubre                                                     |
| Dahdouh, Fernando Lázaro, Esther Viedma, Natalia Stella, Julio García, Juan Carlos Galán, Rafael Cantón, M <sup>a</sup> Dolores Folgueira, Rafael Delgado, Jesús Mingorance | EPI_ISL_428691 | hCoV-19/Spain/Madrid_H12_28/2020 | Europe / Spain / Madrid                       | 2020-03-21 | Hospital Universitario 12 de Octubre                                                     |
| Dahdouh, Fernando Lázaro, Esther Viedma, Natalia Stella, Julio García, Juan Carlos Galán, Rafael Cantón, M <sup>a</sup> Dolores Folgueira, Rafael Delgado, Jesús Mingorance | EPI_ISL_428692 | hCoV-19/Spain/Madrid_H12_29/2020 | Europe / Spain / Madrid                       | 2020-03-12 | Hospital Universitario 12 de Octubre                                                     |
| Dahdouh, Fernando Lázaro, Esther Viedma, Natalia Stella, Julio García, Juan Carlos Galán, Rafael Cantón, M <sup>a</sup> Dolores Folgueira, Rafael Delgado, Jesús Mingorance | EPI_ISL_428693 | hCoV-19/Spain/Madrid_H12_30/2020 | Europe / Spain / Madrid                       | 2020-03-12 | Hospital Universitario 12 de Octubre                                                     |
| Dahdouh, Fernando Lázaro, Esther Viedma, Natalia Stella, Julio García, Juan Carlos Galán, Rafael Cantón, M <sup>a</sup> Dolores Folgueira, Rafael Delgado, Jesús Mingorance | EPI_ISL_428694 | hCoV-19/Spain/Madrid_H12_31/2020 | Europe / Spain / Madrid                       | 2020-03-12 | Hospital Universitario 12 de Octubre                                                     |
| Dahdouh, Fernando Lázaro, Esther Viedma, Natalia Stella, Julio García, Juan Carlos Galán, Rafael Cantón, M <sup>a</sup> Dolores Folgueira, Rafael Delgado, Jesús Mingorance | EPI_ISL_428695 | hCoV-19/Spain/Madrid_H12_32/2020 | Europe / Spain / Madrid                       | 2020-03-12 | Hospital Universitario 12 de Octubre                                                     |
| Dahdouh, Fernando Lázaro, Esther Viedma, Natalia Stella, Julio García, Juan Carlos Galán, Rafael Cantón, M <sup>a</sup> Dolores Folgueira, Rafael Delgado, Jesús Mingorance | EPI_ISL_428696 | hCoV-19/Spain/Madrid_H12_33/2020 | Europe / Spain / Madrid                       | 2020-03-12 | Hospital Universitario 12 de Octubre                                                     |
| Dahdouh, Fernando Lázaro, Esther Viedma, Natalia Stella, Julio García, Juan Carlos Galán, Rafael Cantón, M <sup>a</sup> Dolores Folgueira, Rafael Delgado, Jesús Mingorance | EPI_ISL_428697 | hCoV-19/Spain/Madrid_H12_34/2020 | Europe / Spain / Madrid                       | 2020-03-12 | Hospital Universitario 12 de Octubre                                                     |
| Dahdouh, Fernando Lázaro, Esther Viedma, Natalia Stella, Julio García, Juan Carlos Galán, Rafael Cantón, M <sup>a</sup> Dolores Folgueira, Rafael Delgado, Jesús Mingorance | EPI_ISL_428698 | hCoV-19/Spain/Madrid_H12_35/2020 | Europe / Spain / Madrid                       | 2020-03-12 | Hospital Universitario 12 de Octubre                                                     |
| Dahdouh, Fernando Lázaro, Esther Viedma, Natalia Stella, Julio García, Juan Carlos Galán, Rafael Cantón, M <sup>a</sup> Dolores Folgueira, Rafael Delgado, Jesús Mingorance | EPI_ISL_428699 | hCoV-19/Spain/Madrid_H12_36/2020 | Europe / Spain / Madrid                       | 2020-03-09 | Hospital Universitario 12 de Octubre                                                     |
| Centre Hospitalier Compiegne Laboratoire de Biologie                                                                                                                        | EPI_ISL_429968 | hCoV-19/France/HF1463/2020       | Europe / France / Hauts de France / Compiègne | 2020-02-21 | National Reference Center for Viruses of Respiratory Infections, Institut Pasteur, Paris |
| Brisebarre, Flora Donati, Fabiana Gambaro, Etienne Simon-Lorière, Vincent Enouf, Maud Vanpeene, Sylvie van der Werf, Raulin Olivia                                          | EPI_ISL_429969 | hCoV-19/USA/VA-DCLS-0069/2020    | North America / USA / Virginia                | 2020-03-26 | Virginia DCLS                                                                            |
|                                                                                                                                                                             | EPI_ISL_429970 | hCoV-19/USA/VA-DCLS-0070/2020    | North America / USA / Virginia                | 2020-03-28 | Virginia DCLS                                                                            |

|                                                                       |                                              |                                              |            |                                                 |  |
|-----------------------------------------------------------------------|----------------------------------------------|----------------------------------------------|------------|-------------------------------------------------|--|
| Virginia DCLS                                                         | Virginia DCLS                                |                                              |            |                                                 |  |
| EPI_ISL_429971                                                        | hCoV-19/USA/VA-DCLS-0071/2020                | North America / USA / Virginia               | 2020-03-30 | Virginia DCLS                                   |  |
| Virginia DCLS                                                         | Virginia DCLS                                |                                              |            |                                                 |  |
| EPI_ISL_429972                                                        | hCoV-19/USA/VA-DCLS-0072/2020                | North America / USA / Virginia               | 2020-03-28 | Virginia DCLS                                   |  |
| Virginia DCLS                                                         | Virginia DCLS                                |                                              |            |                                                 |  |
| EPI_ISL_429973                                                        | hCoV-19/USA/VA-DCLS-0073/2020                | North America / USA / Virginia               | 2020-03-28 | Virginia DCLS                                   |  |
| Virginia DCLS                                                         | Virginia DCLS                                |                                              |            |                                                 |  |
| EPI_ISL_429974                                                        | hCoV-19/USA/VA-DCLS-0075/2020                | North America / USA / Virginia               | 2020-03-29 | Virginia DCLS                                   |  |
| Virginia DCLS                                                         | Virginia DCLS                                |                                              |            |                                                 |  |
| EPI_ISL_429975                                                        | hCoV-19/USA/VA-DCLS-0076/2020                | North America / USA / Virginia               | 2020-03-27 | Virginia DCLS                                   |  |
| Virginia DCLS                                                         | Virginia DCLS                                |                                              |            |                                                 |  |
| EPI_ISL_429976                                                        | hCoV-19/USA/VA-DCLS-0077/2020                | North America / USA / Virginia               | 2020-04-04 | Virginia DCLS                                   |  |
| Virginia DCLS                                                         | Virginia DCLS                                |                                              |            |                                                 |  |
| EPI_ISL_429977                                                        | hCoV-19/USA/VA-DCLS-0078/2020                | North America / USA / Virginia               | 2020-03-27 | Virginia DCLS                                   |  |
| Virginia DCLS                                                         | Virginia DCLS                                |                                              |            |                                                 |  |
| EPI_ISL_429978                                                        | hCoV-19/USA/VA-DCLS-0079/2020                | North America / USA / Virginia               | 2020-03-30 | Virginia DCLS                                   |  |
| Virginia DCLS                                                         | Virginia DCLS                                |                                              |            |                                                 |  |
| EPI_ISL_429979                                                        | hCoV-19/USA/VA-DCLS-0080/2020                | North America / USA / Virginia               | 2020-03-26 | Virginia DCLS                                   |  |
| Virginia DCLS                                                         | Virginia DCLS                                |                                              |            |                                                 |  |
| EPI_ISL_429980                                                        | hCoV-19/USA/VA-DCLS-0081/2020                | North America / USA / Virginia               | 2020-04-03 | Virginia DCLS                                   |  |
| Virginia DCLS                                                         | Virginia DCLS                                |                                              |            |                                                 |  |
| EPI_ISL_429981                                                        | hCoV-19/USA/VA-DCLS-0083/2020                | North America / USA / Virginia               | 2020-04-03 | Virginia DCLS                                   |  |
| Virginia DCLS                                                         | Virginia DCLS                                |                                              |            |                                                 |  |
| EPI_ISL_429982                                                        | hCoV-19/USA/VA-DCLS-0084/2020                | North America / USA / Virginia               | 2020-04-06 | Virginia DCLS                                   |  |
| Virginia DCLS                                                         | Virginia DCLS                                |                                              |            |                                                 |  |
| EPI_ISL_429983                                                        | hCoV-19/USA/VA-DCLS-0086/2020                | North America / USA / Virginia               | 2020-03-30 | Virginia DCLS                                   |  |
| Virginia DCLS                                                         | Virginia DCLS                                |                                              |            |                                                 |  |
| EPI_ISL_429984                                                        | hCoV-19/USA/VA-DCLS-0087/2020                | North America / USA / Virginia               | 2020-04-02 | Virginia DCLS                                   |  |
| Virginia DCLS                                                         | Virginia DCLS                                |                                              |            |                                                 |  |
| EPI_ISL_429985                                                        | hCoV-19/USA/VA-DCLS-0088/2020                | North America / USA / Virginia               | 2020-04-02 | Virginia DCLS                                   |  |
| Virginia DCLS                                                         | Virginia DCLS                                |                                              |            |                                                 |  |
| EPI_ISL_429986                                                        | hCoV-19/USA/VA-DCLS-0089/2020                | North America / USA / Virginia               | 2020-04-02 | Virginia DCLS                                   |  |
| Virginia DCLS                                                         | Virginia DCLS                                |                                              |            |                                                 |  |
| EPI_ISL_429987                                                        | hCoV-19/USA/VA-DCLS-0090/2020                | North America / USA / Virginia               | 2020-04-02 | Virginia DCLS                                   |  |
| Virginia DCLS                                                         | Virginia DCLS                                |                                              |            |                                                 |  |
| EPI_ISL_429988                                                        | hCoV-19/USA/VA-DCLS-0091/2020                | North America / USA / Virginia               | 2020-04-02 | Virginia DCLS                                   |  |
| Virginia DCLS                                                         | Virginia DCLS                                |                                              |            |                                                 |  |
| EPI_ISL_429989                                                        | hCoV-19/USA/VA-DCLS-0092/2020                | North America / USA / Virginia               | 2020-04-01 | Virginia DCLS                                   |  |
| Virginia DCLS                                                         | Virginia DCLS                                |                                              |            |                                                 |  |
| EPI_ISL_429990                                                        | hCoV-19/USA/CA-SR007/2020                    | North America / USA / California / San Diego | 2020-03-21 |                                                 |  |
| Rady's Childrens Hospital                                             | Andersen lab at Scripps Research             |                                              |            | SEARCH Alliance San Diego with                  |  |
| Christina Clarke, Michelle Vanderpool, Teresa Mueller, Denise Malicki |                                              |                                              |            |                                                 |  |
| EPI_ISL_429991                                                        | hCoV-19/USA/CA-SR017/2020                    | North America / USA / California / San Diego | 2020-03-24 |                                                 |  |
| Andersen lab at Scripps Research                                      | Andersen lab at Scripps Research             |                                              |            | SEARCH Alliance San Diego                       |  |
| EPI_ISL_429992                                                        | hCoV-19/Jordan/SR-032/2020                   | Asia / Jordan / Amman                        | 2020-03-22 | Biolab Diagnostic                               |  |
| Laboratories                                                          | Andersen lab at Scripps Research             |                                              |            | Issa Abu-Dayyeh, Ahmad Tibi, Lama Hussein, Lina |  |
| Mohammad, Zein Naber, Amid Abdelnour with SEARCH Alliance San Diego   |                                              |                                              |            |                                                 |  |
| EPI_ISL_429993                                                        | hCoV-19/Jordan/SR-033/2020                   | Asia / Jordan / Amman                        | 2020-03-16 | Biolab Diagnostic                               |  |
| Laboratories                                                          | Andersen lab at Scripps Research             |                                              |            | Issa Abu-Dayyeh, Ahmad Tibi, Lama Hussein, Lina |  |
| Mohammad, Zein Naber, Amid Abdelnour with SEARCH Alliance San Diego   |                                              |                                              |            |                                                 |  |
| EPI_ISL_429994                                                        | hCoV-19/Jordan/SR-034/2020                   | Asia / Jordan / Amman                        | 2020-03-17 | Biolab Diagnostic                               |  |
| Laboratories                                                          | Andersen lab at Scripps Research             |                                              |            | Issa Abu-Dayyeh, Ahmad Tibi, Lama Hussein, Lina |  |
| Mohammad, Zein Naber, Amid Abdelnour with SEARCH Alliance San Diego   |                                              |                                              |            |                                                 |  |
| EPI_ISL_429995                                                        | hCoV-19/Jordan/SR-035/2020                   | Asia / Jordan / Amman                        | 2020-03-30 | Biolab Diagnostic                               |  |
| Laboratories                                                          | Andersen lab at Scripps Research             |                                              |            | Issa Abu-Dayyeh, Ahmad Tibi, Lama Hussein, Lina |  |
| Mohammad, Zein Naber, Amid Abdelnour with SEARCH Alliance San Diego   |                                              |                                              |            |                                                 |  |
| EPI_ISL_429996                                                        | hCoV-19/Jordan/SR-036/2020                   | Asia / Jordan / Amman                        | 2020-03-23 | Biolab Diagnostic                               |  |
| Laboratories                                                          | Andersen lab at Scripps Research             |                                              |            | Issa Abu-Dayyeh, Ahmad Tibi, Lama Hussein, Lina |  |
| Mohammad, Zein Naber, Amid Abdelnour with SEARCH Alliance San Diego   |                                              |                                              |            |                                                 |  |
| EPI_ISL_429997                                                        | hCoV-19/Jordan/SR-037/2020                   | Asia / Jordan / Amman                        | 2020-03-16 | Biolab Diagnostic                               |  |
| Laboratories                                                          | Andersen lab at Scripps Research             |                                              |            | Issa Abu-Dayyeh, Ahmad Tibi, Lama Hussein, Lina |  |
| Mohammad, Zein Naber, Amid Abdelnour with SEARCH Alliance San Diego   |                                              |                                              |            |                                                 |  |
| EPI_ISL_429998                                                        | hCoV-19/Jordan/SR-039/2020                   | Asia / Jordan / Amman                        | 2020-03-28 | Biolab Diagnostic                               |  |
| Laboratories                                                          | Andersen lab at Scripps Research             |                                              |            | Issa Abu-Dayyeh, Ahmad Tibi, Lama Hussein, Lina |  |
| Mohammad, Zein Naber, Amid Abdelnour with SEARCH Alliance San Diego   |                                              |                                              |            |                                                 |  |
| EPI_ISL_429999                                                        | hCoV-19/Jordan/SR-041/2020                   | Asia / Jordan / Amman                        | 2020-03-17 | Biolab Diagnostic                               |  |
| Laboratories                                                          | Andersen lab at Scripps Research             |                                              |            | Issa Abu-Dayyeh, Ahmad Tibi, Lama Hussein, Lina |  |
| Mohammad, Zein Naber, Amid Abdelnour with SEARCH Alliance San Diego   |                                              |                                              |            |                                                 |  |
| EPI_ISL_402119                                                        | hCoV-19/Wuhan/IVDC-HB-01/2019                | Asia / China / Hubei / Wuhan                 | 2019-12-30 | National                                        |  |
| Institute for Viral Disease Control and Prevention, China CDC         | National Institute for Viral Disease Control |                                              |            |                                                 |  |



and Prevention, China CDC Wenjie Tan, Xiang Zhao, Wenling Wang, Xuejun Ma, Yongzhong Jiang, Roujian Lu, Ji Wang, Weimin Zhou, Peihua Niu, Peipei Liu, Faxian Zhan, Weifeng Shi, Baoying Huang, Jun Liu, Li Zhao, Yao Meng, Xiaozhou He, Fei Ye, Na Zhu, Yang Li, Jing Chen, Wenbo Xu, George F. Gao, Guizhen Wu

EPI\_ISL\_402120 hCoV-19/Wuhan/IVDC-HB-04/2020 Asia / China / Hubei / Wuhan 2020-01-01 National Institute for Viral Disease Control and Prevention, China CDC National Institute for Viral Disease Control and Prevention, China CDC Wenjie Tan, Xiang Zhao, Wenling Wang, Xuejun Ma, Yongzhong Jiang, Roujian Lu, Ji Wang, Weimin Zhou, Peihua Niu, Peipei Liu, Faxian Zhan, Weifeng Shi, Baoying Huang, Jun Liu, Li Zhao, Yao Meng, Xiaozhou He, Fei Ye, Na Zhu, Yang Li, Jing Chen, Wenbo Xu, George F. Gao, Guizhen Wu

EPI\_ISL\_402121 hCoV-19/Wuhan/IVDC-HB-05/2019 Asia / China / Hubei / Wuhan 2019-12-30 National Institute for Viral Disease Control and Prevention, China CDC National Institute for Viral Disease Control and Prevention, China CDC Wenjie Tan, Xuejun Ma, Xiang Zhao, Wenling Wang, Yongzhong Jiang, Roujian Lu, Ji Wang, Peihua Niu, Weimin Zhou, Faxian Zhan, Weifeng Shi, Baoying Huang, Jun Liu, Li Zhao, Yao Meng, Fei Ye, Na Zhu, Xiaozhou He, Peipei Liu, Yang Li, Jing Chen, Wenbo Xu, George F. Gao, Guizhen Wu

EPI\_ISL\_402123 hCoV-19/Wuhan/IPBCAMS-WH-01/2019 Asia / China / Hubei / Wuhan 2019-12-24 Institute of Pathogen Biology, Chinese Academy of Medical Sciences & Peking Union Medical College Institute of Pathogen Biology, Chinese Academy of Medical Sciences & Peking Union Medical College Lili Ren, Jianwei Wang, Qi Jin, Zichun Xiang, Zhiqiang Wu, Chao Wu, Yiwei Liu

EPI\_ISL\_402124 hCoV-19/Wuhan/WIV04/2019 Asia / China / Hubei / Wuhan 2019-12-30 Wuhan Jinyintan Hospital Wuhan Institute of Virology, Chinese Academy of Sciences Peng Zhou, Xing-Lou Yang, Ding-Yu Zhang, Lei Zhang, Yan Zhu, Hao-Rui Si, Zhengli Shi

EPI\_ISL\_402127 hCoV-19/Wuhan/WIV02/2019 Asia / China / Hubei / Wuhan 2019-12-30 Wuhan Jinyintan Hospital Wuhan Institute of Virology, Chinese Academy of Sciences Peng Zhou, Xing-Lou Yang, Ding-Yu Zhang, Lei Zhang, Yan Zhu, Hao-Rui Si, Zhengli Shi

EPI\_ISL\_402128 hCoV-19/Wuhan/WIV05/2019 Asia / China / Hubei / Wuhan 2019-12-30 Wuhan Jinyintan Hospital Wuhan Institute of Virology, Chinese Academy of Sciences Peng Zhou, Xing-Lou Yang, Ding-Yu Zhang, Lei Zhang, Yan Zhu, Hao-Rui Si, Zhengli Shi

EPI\_ISL\_402129 hCoV-19/Wuhan/WIV06/2019 Asia / China / Hubei / Wuhan 2019-12-30 Wuhan Jinyintan Hospital Wuhan Institute of Virology, Chinese Academy of Sciences Peng Zhou, Xing-Lou Yang, Ding-Yu Zhang, Lei Zhang, Yan Zhu, Hao-Rui Si, Zhengli Shi

EPI\_ISL\_402130 hCoV-19/Wuhan/WIV07/2019 Asia / China / Hubei / Wuhan 2019-12-30 Wuhan Jinyintan Hospital Wuhan Institute of Virology, Chinese Academy of Sciences Peng Zhou, Xing-Lou Yang, Ding-Yu Zhang, Lei Zhang, Yan Zhu, Hao-Rui Si, Zhengli Shi

EPI\_ISL\_402132 hCoV-19/Wuhan/HBCDC-HB-01/2019 Asia / China / Hubei / Wuhan 2019-12-30 Wuhan Jinyintan Hospital Hubei Provincial Center for Disease Control and Prevention Bin Fang, Xiang Li, Xiao Yu, Linlin Liu, Bo Yang, Faxian Zhan, Guojun Ye, Xixiang Huo, Junqiang Xu, Bo Yu, Kun Cai, Jing Li, Yongzhong Jiang.

EPI\_ISL\_408008 hCoV-19/USA/CA3/2020 North America / USA / California 2020-01-29 California Department of Health Pathogen Discovery, Respiratory Viruses Branch, Division of Viral Diseases, Centers for Disease Control and Prevention Krista Queen, Jing Zhang, Yan Li, Ying Tao, Anna Uehara, Clinton Paden, Xiaoyan Lu, Brian Lynch, Senthil Kumar K. Sakthivel, Brett L. Whitaker, Shifaq Kamili, Lijuan Wang, Janna' R. Murray, Susan I. Gerber, Stephen Lindstrom, Suxiang Tong

EPI\_ISL\_408009 hCoV-19/USA/CA4/2020 North America / USA / California 2020-01-29 California Department of Health Pathogen Discovery, Respiratory Viruses Branch, Division of Viral Diseases, Centers for Diseases Control and Prevention Krista Queen, Jing Zhang, Yan Li, Ying Tao, Anna Uehara, Clinton Paden, Xiaoyan Lu, Brian Lynch, Senthil Kumar K. Sakthivel, Brett L. Whitaker, Shifaq Kamili, Lijuan Wang, Janna' R. Murray, Susan I. Gerber, Stephen Lindstrom, Suxiang Tong

EPI\_ISL\_408010 hCoV-19/USA/CA5/2020 North America / USA / California 2020-01-29 California Department of Health Pathogen Discovery, Respiratory Viruses Branch, Division of Viral Diseases, Centers for Diseases Control and Prevention Ying Tao, Krista Queen, Jing Zhang, Yan Li, Anna Uehara, Clinton Paden, Xiaoyan Lu, Brian Lynch, Senthil Kumar K. Sakthivel, Brett L. Whitaker, Shifaq Kamili, Lijuan Wang, Janna' R. Murray, Susan I. Gerber, Stephen Lindstrom, Suxiang Tong

EPI\_ISL\_410301 hCoV-19/Nepal/61/2020 Asia / Nepal / Kathmandu 2020-01-13 National Influenza Centre, National Public Health Laboratory, Kathmandu, Nepal The University of Hong Kong Ranjit Sah, Runa Jha, Daniel Chu, Haogao Gu, Malik Peiris, Anup Bastola, Alfonso J. Rodriguez-Morales, Bibek Kumar Lal, Basu Dev Pandey, Leo Poon

EPI\_ISL\_411902 hCoV-19/Cambodia/0012/2020 Asia / Cambodia / Sihanoukville 2020-01-27 Virology Unit, Institut Pasteur du Cambodge. Virology Unit, Institut Pasteur du Cambodge (Sequencing done by: Jessica E Manning/Jennifer A Bohl at Malaria and Vector Research Research Laboratory, National Institute of Allergy and Infectious Diseases and Vida Ahpong from Chan-Zuckerberg Biohub) Erik A Karlsson, Jennifer A Bohl, Vida Ahpong, Veasna Duong, Philippe Dussart, Jessica E Manning.

EPI\_ISL\_411915 hCoV-19/Taiwan/CGMH-CGU-01/2020 Asia / Taiwan / Taoyuan 2020-01-25 Laboratory Medicine Department of Laboratory Medicine, Lin-Kou Chang Gung Memorial Hospital, Taoyuan, Taiwan. Kuo-Chien Tsao, Yu-Nong Gong, Shu-Li Yang, Yi-Chun Li, Chung-Guei Huang, Yhu-Chering Huang, Shin-Ru Shih

EPI\_ISL\_411926 hCoV-19/Taiwan/3/2020 Asia / Taiwan / Taipei 2020-01-24 Taiwan Centers for Disease Control Taiwan Centers for Disease Control Ji-Rong Yang, Yu-Chi-Lin, Jung-Jung Mu, Ming-Tsan-Liu

EPI\_ISL\_411927 hCoV-19/Taiwan/4/2020 Asia / Taiwan / Taipei 2020-01-28 Taiwan Centers for Disease Control Taiwan Centers for Disease Control Ji-Rong Yang, Yu-Chi-Lin, Jung-Jung Mu, Ming-Tsan-Liu

EPI\_ISL\_411929 hCoV-19/South Korea/SNU01/2020 Asia / South Korea 2020-01 unknown Department of Clinical Diagnostics Park,W.B., Kwon,N.-J., Choi,S.-J., Kang,C.K., Choe,P.G., Kim,J.Y., Yun,J., Lee,G.-W., Seong,M.-

W., Kim,N., Seo,J.-S. and Oh,T.-D.  
EPI\_ISL\_412912 hCoV-19/Germany/Baden-Wuerttemberg-1/2020 Europe / Germany / Baden-Wuerttemberg 2020-02-25 State Health Office Baden-Wuerttemberg Charité Universitätsmedizin Berlin, Institute of Virology Victor M Corman, Julia Schneider, Barbara Mühlemann, Talitha Veith, Jörn Beheim-Schwarzbach, Terry Jones, Rainer Oehme, Silke Fischer, Christian Drosten

EPI\_ISL\_412964 hCoV-19/Brazil/SPBR-01/2020 South America / Brazil / Sao Paulo / Sao Paulo 2020-02-25 Hospital Israelita Albert Einstein Instituto Adolfo Lutz Interdisciplinary Procedures Center Strategic Laboratory Jaqueline Goes de Jesus, Claudio Tavares Sacchi, Daniela Bernardes Borges da Silva, Ingra Morales Claro, Flávia Cristina da Silva Sales, Claudia Regina Gonçalves, Joshua Quick, Maria do Carmo, Sampaio Tavares Timenetsky, Nicholas James Loman, Andrew Rambaut, Ester Cerdeira Sabino, Nuno Rodrigues Faria

EPI\_ISL\_412966 hCoV-19/China/IQTC01/2020 Asia / China / Guangdong / Guangzhou 2020-02-05 unknown Technology Centre, Guangzhou Customs Shi,Y., Sun,J., Zheng,K., Huang,J. and Zhao,J.

EPI\_ISL\_412967 hCoV-19/China/IQTC02/2020 Asia / China / Guangzhou 2020-01-29 unknown Technology Centre, Guangzhou Customs Shi,Y., Zheng,K., Sun,J., Huang,J., Zhu,A., Zhuang,Z., Dai,J., Chen,Z., Sun,F., Zhang,Z., Li,X. and Wang,Y.

EPI\_ISL\_412968 hCoV-19/Japan/Hu\_DP\_Kng\_19-020/2020 Asia / Japan 2020-02-10 unknown Takayuki Hishiki Kanagawa Prefectural Institute of Public Health, Department of Microbiology Hishiki,T., Suzuki,R., Sakuragi,J., Usui,K., Tanaka,Y., Kawai,J., Kogo,Y., Matsuki,Y., An,T., Hayashizaki,Y. and Takasaki,T.

EPI\_ISL\_412969 hCoV-19/Japan/Hu\_DP\_Kng\_19-027/2020 Asia / Japan 2020-02-10 unknown Takayuki Hishiki Kanagawa Prefectural Institute of Public Health, Department of Microbiology Hishiki,T., Suzuki,R., Sakuragi,J., Usui,K., Tanaka,Y., Kawai,J., Kogo,Y., Matsuki,Y., An,T., Hayashizaki,Y. and Takasaki,T.

EPI\_ISL\_412970 hCoV-19/USA/WA2/2020 North America / USA / Washington / Snohomish County 2020-02-24 Washington State Department of Health Seattle Flu Study Helen Chu, Michael Boeckh, Janet Englund, Michael Famulare, Barry Lutz, Deborah Nickerson, Mark Rieder, Lea Starita, Matthew Thompson, Jay Shendure, and Trevor Bedford

EPI\_ISL\_412972 hCoV-19/Mexico/CDMX-INdRE\_01/2020 North America / Mexico / Mexico City 2020-02-27 Instituto Nacional de Enfermedades Respiratorias Instituto de Diagnostico y Referencia Epidemiologicos (INDRE) Ramirez-Gonzalez Ernesto, Garces-Ayala Fabiola, Araiza-Rodriguez Adnan, Mendieta-Condado Edgar, Rodriguez-Maldonado Abril, Wong-Arambula Claudia, Vazquez-Perez Joel, Martinez Arturo, Boukadida Celia, Munoz-Medina Esteban, Sanchez Alejandro, Isa Pavel, Taboada Blanca, Lopez Susana, Arias Carlos, Barrera-Badillo Gisela, Hernandez-Rivas Lucia, Lopez-Martinez Irma

EPI\_ISL\_412973 hCoV-19/Italy/CDG1/2020 Europe / Italy / Lombardy 2020-02-20 Department of Infectious Diseases, Istituto Superiore di Sanità, Roma , Italy Virology Laboratory, Scientific Department, Army Medical Center Paola Stefanelli, Stefano Fiore, Antonella Marchi, Eleonora Benedetti, Concetta Fabiani, Giovanni Faggioni, Antonella Fortunato, Riccardo De Santis, Silvia Fillo, Anna Anselmo, Andrea Ciammaruconi, Stefano Palomba, Florigio Lista

EPI\_ISL\_412974 hCoV-19/Italy/SPL1/2020 Europe / Italy / Rome 2020-01-29 Department of Infectious Diseases, Istituto Superiore di Sanità, Rome, Italy Virology Laboratory, Scientific Department, Army Medical Center Paola Stefanelli, Stefano Fiore, Antonella Marchi, Eleonora Benedetti, Concetta Fabiani, Giovanni Faggioni, Antonella Fortunato, Silvia Fillo, Riccardo De Santis, Andrea Ciammaruconi, Giancarlo Petralito, Filippo Molinari, Florigio Lista

EPI\_ISL\_412975 hCoV-19/Australia/NSW05/2020 Oceania / Australia / New South Wales / Sydney 2020-02-28 Centre for Infectious Diseases and Microbiology Laboratory Services NSW Health Pathology - Institute of Clinical Pathology and Medical Research; Westmead Hospital; University of Sydney Eden J-S, Carter I, Rahman H, Holmes EC, Rockett R, O'Sullivan MV, Sintchenko V, Chen SC, Maddocks S, Kok J and Dwyer DE for the 2019-nCoV Study Group

EPI\_ISL\_412978 hCoV-19/Wuhan/HBCDC-HB-02/2020 Asia / China / Hubei / Wuhan 2020-01-17 The Central Hospital Of Wuhan Hubei Provincial Center for Disease Control and Prevention Bin Fang, Xiang Li, Xiao Yu, Linlin Liu, Bo Yang, Faxian Zhan, Guojun Ye, Xixiang Huo, Junqiang Xu, Bo Yu, Kun Cai, Jing Li, Yongzhong Jiang.

EPI\_ISL\_412979 hCoV-19/Wuhan/HBCDC-HB-03/2020 Asia / China / Hubei / Wuhan 2020-01-18 Union Hospital of Tongji Medical College, Huazhong University of Science and Technology Hubei Provincial Center for Disease Control and Prevention Bin Fang, Xiang Li, Xiao Yu, Linlin Liu, Bo Yang, Faxian Zhan, Guojun Ye, Xixiang Huo, Junqiang Xu, Bo Yu, Kun Cai, Jing Li, Yongzhong Jiang.

EPI\_ISL\_412980 hCoV-19/Wuhan/HBCDC-HB-04/2020 Asia / China / Hubei / Wuhan 2020-01-18 Union Hospital of Tongji Medical College, Huazhong University of Science and Technology Hubei Provincial Center for Disease Control and Prevention Bin Fang, Xiang Li, Xiao Yu, Linlin Liu, Bo Yang, Faxian Zhan, Guojun Ye, Xixiang Huo, Junqiang Xu, Bo Yu, Kun Cai, Jing Li, Yongzhong Jiang.

EPI\_ISL\_412981 hCoV-19/Wuhan/HBCDC-HB-05/2020 Asia / China / Hubei / Wuhan 2020-01-18 CR&WISCO GENERAL HOSPITAL Hubei Provincial Center for Disease Control and Prevention Bin Fang, Xiang Li, Xiao Yu, Linlin Liu, Bo Yang, Faxian Zhan, Guojun Ye, Xixiang Huo, Junqiang Xu, Bo Yu, Kun Cai, Jing Li, Yongzhong Jiang.

EPI\_ISL\_412982 hCoV-19/Wuhan/HBCDC-HB-06/2020 Asia / China / Hubei / Wuhan 2020-02-07 Wuhan Lung Hospital Hubei Provincial Center for Disease Control and Prevention Bin Fang, Xiang Li, Xiao Yu, Linlin Liu, Bo Yang, Faxian Zhan, Guojun Ye, Xixiang Huo, Junqiang Xu, Bo Yu, Kun Cai, Jing Li, Yongzhong Jiang.

EPI\_ISL\_412983 hCoV-19/Tianmen/HBCDC-HB-07/2020 Asia / China / Hubei / Tianmen 2020-02-08 Tianmen Center for Disease Control and Prevention Hubei Provincial Center for Disease Control and Prevention Bin Fang, Xiang Li, Xiao Yu, Linlin Liu, Bo Yang, Faxian Zhan, Guojun Ye, Xixiang Huo, Junqiang Xu, Bo Yu, Kun Cai, Jing Li, YiFa Zhu, Yangyang Tao, Xierong Li, Yongzhong Jiang.

EPI\_ISL\_415105 hCoV-19/Brazil/BA-312/2020 South America / Brazil / Bahia / Feira de Santana 2020-03-04 Laboratório Central de Saúde Pública Professor Gonçalo Moniz - LACEN/BA Instituto Oswaldo Cruz FIOCRUZ - Laboratory of Respiratory Viruses and Measles (LVRS) Paola Resende, Allison Fabri, Joilson Xavier, Sunando Roy, Fernando Motta, Aline Mattos, Milene Miranda, Cristiana Garcia, Braulia Caetano, Maria Ogrzewalska, Jonathan Lopes, Luciana Appolinario, Maria Nóbrega, Marilda Siqueira

EPI\_ISL\_415128 hCoV-19/Brazil/ES-225/2020 South America / Brazil / Espirito Santo / Vila Velha 2020-02-29 LACEN/ES - Laboratório Central de Saúde Pública do Espírito Santo Instituto Oswaldo Cruz FIOCRUZ - Laboratory of Respiratory Viruses and Measles (LVRS) Paola Resende, Allison Fabri, Joilson Xavier, Sunando Roy, Fernando Motta, Aline Mattos, Milene Miranda, Cristiana Garcia, Braulia Caetano, Maria Ogrzewalska, Jonathan Lopes, Luciana Appolinario, Maria Nóbrega, Marilda Siqueira

EPI\_ISL\_415129 hCoV-19/England/20099038206/2020 Europe / United Kingdom / England 2020-02-29 Respiratory Virus Unit, Microbiology Services Colindale, Public Health England Respiratory Virus Unit, Microbiology Services Colindale, Public Health England Monica Galiano, Shahjahan Miah, Angie Lackenby, Omolola Akinbami, Tiina Talts, Leena Bhaw, Richard Myers, Steven Platt, Kirstin Edwards, Jonathan Hubb, Joanna Ellis, Maria Zambon

EPI\_ISL\_415134 hCoV-19/England/20100004806/2020 Europe / United Kingdom / England 2020-02-29 Respiratory Virus Unit, Microbiology Services Colindale, Public Health England Respiratory Virus Unit, Microbiology Services Colindale, Public Health England Monica Galiano, Shahjahan Miah, Angie Lackenby, Omolola Akinbami, Tiina Talts, Leena Bhaw, Richard Myers, Steven Platt, Kirstin Edwards, Jonathan Hubb, Joanna Ellis, Maria Zambon

EPI\_ISL\_415136 hCoV-19/England/20100022706/2020 Europe / United Kingdom / England 2020-02-29 Respiratory Virus Unit, Microbiology Services Colindale, Public Health England Respiratory Virus Unit, Microbiology Services Colindale, Public Health England Monica Galiano, Shahjahan Miah, Angie Lackenby, Omolola Akinbami, Tiina Talts, Leena Bhaw, Richard Myers, Steven Platt, Kirstin Edwards, Jonathan Hubb, Joanna Ellis, Maria Zambon

EPI\_ISL\_415141 hCoV-19/England/20100121007/2020 Europe / United Kingdom / England 2020-02-29 Respiratory Virus Unit, Microbiology Services Colindale, Public Health England Respiratory Virus Unit, Microbiology Services Colindale, Public Health England Monica Galiano, Shahjahan Miah, Angie Lackenby, Omolola Akinbami, Tiina Talts, Leena Bhaw, Richard Myers, Steven Platt, Kirstin Edwards, Jonathan Hubb, Joanna Ellis, Maria Zambon

EPI\_ISL\_415142 hCoV-19/England/20100122106/2020 Europe / United Kingdom / England 2020-03-02 Respiratory Virus Unit, Microbiology Services Colindale, Public Health England Respiratory Virus Unit, Microbiology Services Colindale, Public Health England Monica Galiano, Shahjahan Miah, Angie Lackenby, Omolola Akinbami, Tiina Talts, Leena Bhaw, Richard Myers, Steven Platt, Kirstin Edwards, Jonathan Hubb, Joanna Ellis, Maria Zambon

EPI\_ISL\_415147 hCoV-19/England/20102000506/2020 Europe / United Kingdom / England 2020-03-01 Respiratory Virus Unit, Microbiology Services Colindale, Public Health England Respiratory Virus Unit, Microbiology Services Colindale, Public Health England Monica Galiano, Shahjahan Miah, Angie Lackenby, Omolola Akinbami, Tiina Talts, Leena Bhaw, Richard Myers, Steven Platt, Kirstin Edwards, Jonathan Hubb, Joanna Ellis, Maria Zambon

EPI\_ISL\_415148 hCoV-19/England/20102000906/2020 Europe / United Kingdom / England 2020-03-03 Respiratory Virus Unit, Microbiology Services Colindale, Public Health England Respiratory Virus Unit, Microbiology Services Colindale, Public Health England Monica Galiano, Shahjahan Miah, Angie Lackenby, Omolola Akinbami, Tiina Talts, Leena Bhaw, Richard Myers, Steven Platt, Kirstin Edwards, Jonathan Hubb, Joanna Ellis, Maria Zambon

EPI\_ISL\_415150 hCoV-19/England/20110003506/2020 Europe / United Kingdom / England 2020-03-09 Respiratory Virus Unit, Microbiology Services Colindale, Public Health England Respiratory Virus Unit, Microbiology Services Colindale, Public Health England Monica Galiano, Shahjahan Miah, Angie Lackenby, Omolola Akinbami, Tiina Talts, Leena Bhaw, Richard Myers, Steven Platt, Kirstin Edwards, Jonathan Hubb, Joanna Ellis, Maria Zambon

EPI\_ISL\_415151 hCoV-19/USA/NY2-PV08100/2020 North America / USA / New York 2020-03-04 MSHS Clinical Microbiology Laboratories MSHS Pathogen Surveillance Program Gopi Patel, Emilia Sordillo, Melissa Gitman, Alberto Paniz-mondolfi, Matthew Hernandez, Shelcie Fabre, Jose Polanco, Ana Silvia Gonzalez-Reiche, Zenab Khan, Nancy Francoeur, Melissa Smith, Robert Sebra, Lisa Miorin, Wen-chun Liu, Randy Albrecht, Judith Aberg, Florian Krammer, Adolfo Garcia-Sarstre, Viviana Simon, Harm van Bakel

EPI\_ISL\_415152 hCoV-19/Panama/328677/2020 Central America / Panama / Panama City 2020-03-06 Gorgas Memorial Institute for Health Studies Gorgas Memorial Institute for Health Studies Danilo Franco, Sandra Lopez-Verges, Elimelec Valdespino, Claudia Gonzalez, Oris Chavarria, Ambar Moreno, Yamilka Diaz, Leyda Abrego, Juan M. Pascale, Alexander A. Martinez.

EPI\_ISL\_415153 hCoV-19/Belgium/VLM-03011/2020 Europe / Belgium / Huldenberg 2020-03-03 KU Leuven, Clinical and Epidemiological Virology KU Leuven, Clinical and Epidemiological Virology Bert Vanmechelen, Joan Marti-Carreras, Tony Wawina, Marc Van Ranst, Piet Maes

EPI\_ISL\_415154 hCoV-19/Belgium/BM-03012/2020 Europe / Belgium / Kraainem 2020-03-01 KU Leuven, Clinical and Epidemiological Virology KU Leuven, Clinical and Epidemiological Virology Bert Vanmechelen, Joan Marti-Careras, Tony Wawina, Marc Van Ranst, Piet Maes.

EPI\_ISL\_415155 hCoV-19/Belgium/VAG-03013/2020 Europe / Belgium / Huldenberg 2020-03-01 KU Leuven, Clinical and Epidemiological Virology KU Leuven, Clinical and Epidemiological Virology Bert Vanmechelen, Joan Marti-Carreras, Tony Wawina, Marc Van Ranst, Piet Maes

EPI\_ISL\_415156 hCoV-19/Belgium/SH-03014/2020 Europe / Belgium / Huldenberg 2020-03-01 KU Leuven, Clinical and Epidemiological Virology KU Leuven, Clinical and Epidemiological Virology Bert Vanmechelen, Joan Marti-Carreras, Tony Wawina, Marc Van Ranst, Piet Maes

Vanmechelen, Joan Marti-Carreras, Tony Wawina, Piet Maes  
EPI\_ISL\_415157 hCoV-19/Belgium/BC-03016/2020 Europe / Belgium / Sint-Niklaas 2020-03-01 KU Leuven,  
Clinical and Epidemiological Virology KU Leuven, Clinical and Epidemiological Virology Bert

Vanmechelen, Joan Marti-Carreras, Tony Wawina, Piet Maes  
EPI\_ISL\_415158 hCoV-19/Belgium/QKJ-03015/2020 Europe / Belgium / Brussels 2020-03-01 KU Leuven,  
Clinical and Epidemiological Virology KU Leuven, Clinical and Epidemiological Virology Bert

Vanmechelen, Joan Marti-Carreras, Tony Wawina, Piet Maes  
EPI\_ISL\_415159 hCoV-19/Belgium/BA-02291/2020 Europe / Belgium / Leuven 2020-02-29 KU Leuven,  
Clinical and Epidemiological Virology KU Leuven, Clinical and Epidemiological Virology Bert

Vanmechelen, Joan Marti-Carreras, Tony Wawina, Piet Maes  
EPI\_ISL\_415435 hCoV-19/Wales/PHW06/2020 Europe / United Kingdom / Wales 2020-03-06 Wales  
Specialist Virology Centre Public Health Wales Microbiology Cardiff Catherine Moore, Joanne

Watkins, Sally Corden, Tom Connor  
EPI\_ISL\_415454 hCoV-19/Switzerland/GE1422/2020 Europe / Switzerland 2020-02-28 Hôpitaux universitaires  
de Genève Laboratoire de Virologie Hôpitaux universitaires de Genève Laboratoire de Virologie  
Laubscher F.

EPI\_ISL\_415455 hCoV-19/Switzerland/GE0199/2020 Europe / Switzerland 2020-02-28 Hôpitaux universitaires  
de Genève Laboratoire de Virologie Hôpitaux universitaires de Genève Laboratoire de Virologie  
Laubscher F.

EPI\_ISL\_415456 hCoV-19/Switzerland/BE6651/2020 Europe / Switzerland 2020-02-29 Hôpitaux universitaires  
de Genève Laboratoire de Virologie Hôpitaux universitaires de Genève Laboratoire de Virologie  
Laubscher F.

EPI\_ISL\_415457 hCoV-19/Switzerland/AG7120/2020 Europe / Switzerland 2020-02-29 Hôpitaux universitaires  
de Genève Laboratoire de Virologie Hôpitaux universitaires de Genève Laboratoire de Virologie  
Laubscher F.

EPI\_ISL\_415458 hCoV-19/Switzerland/GE8102/2020 Europe / Switzerland 2020-03-01 Hôpitaux universitaires  
de Genève Laboratoire de Virologie Hôpitaux universitaires de Genève Laboratoire de Virologie  
Laubscher F.

EPI\_ISL\_415459 hCoV-19/Switzerland/VD0503/2020 Europe / Switzerland / Genève 2020-02-29 Hôpitaux  
universitaires de Genève Laboratoire de Virologie Hôpitaux universitaires de Genève Laboratoire de  
Virologie Laubscher F.

EPI\_ISL\_415460 hCoV-19/Netherlands/Flevoland\_1/2020 Europe / Netherlands / Flevoland 2020-03-09  
Dutch COVID-19 response team Erasmus Medical Center David Nieuwenhuijse, Bas Oude Munnink, Reina Sikkema,  
Claudia Schapendonk, Irina Chestakova, Anne van der Linden, Mark Pronk, Pascal Lexmond, Corien Swaan, Manon  
Haverkate, Madelief Mollers, Mart Stein, Sandra Kengne Kamga Mobou, Jeroen van Kampen, Jolanda Voermans, Aura  
Timen, Corine GeurtsvanKessel, Annemiek van der Eijk, Richard Molenkamp, Marion Koopmans, on behalf of the  
Dutch national COVID-19 response team.

EPI\_ISL\_415461 hCoV-19/Netherlands/Gelderland\_1-2/2020 Europe / Netherlands / Gelderland 2020-03-10  
Dutch COVID-19 response team Erasmus Medical Center David Nieuwenhuijse, Bas Oude Munnink, Reina Sikkema,  
Claudia Schapendonk, Irina Chestakova, Anne van der Linden, Mark Pronk, Pascal Lexmond, Corien Swaan, Manon  
Haverkate, Madelief Mollers, Mart Stein, Sandra Kengne Kamga Mobou, Jeroen van Kampen, Jolanda Voermans, Aura  
Timen, Corine GeurtsvanKessel, Annemiek van der Eijk, Richard Molenkamp, Marion Koopmans, on behalf of the  
Dutch national COVID-19 response team.

EPI\_ISL\_415462 hCoV-19/Netherlands/Gelderland\_2/2020 Europe / Netherlands / Gelderland 2020-03-09  
Dutch COVID-19 response team Erasmus Medical Center David Nieuwenhuijse, Bas Oude Munnink, Reina Sikkema,  
Claudia Schapendonk, Irina Chestakova, Anne van der Linden, Mark Pronk, Pascal Lexmond, Corien Swaan, Manon  
Haverkate, Madelief Mollers, Mart Stein, Sandra Kengne Kamga Mobou, Jeroen van Kampen, Jolanda Voermans, Aura  
Timen, Corine GeurtsvanKessel, Annemiek van der Eijk, Richard Molenkamp, Marion Koopmans, on behalf of the  
Dutch national COVID-19 response team.

EPI\_ISL\_415463 hCoV-19/Netherlands/Gelderland\_3/2020 Europe / Netherlands / Gelderland 2020-03-09  
Dutch COVID-19 response team Erasmus Medical Center David Nieuwenhuijse, Bas Oude Munnink, Reina Sikkema,  
Claudia Schapendonk, Irina Chestakova, Anne van der Linden, Mark Pronk, Pascal Lexmond, Corien Swaan, Manon  
Haverkate, Madelief Mollers, Mart Stein, Sandra Kengne Kamga Mobou, Jeroen van Kampen, Jolanda Voermans, Aura  
Timen, Corine GeurtsvanKessel, Annemiek van der Eijk, Richard Molenkamp, Marion Koopmans, on behalf of the  
Dutch national COVID-19 response team.

EPI\_ISL\_415464 hCoV-19/Netherlands/Limburg\_7/2020 Europe / Netherlands / Limburg 2020 Dutch COVID-19  
response team Erasmus Medical Center David Nieuwenhuijse, Bas Oude Munnink, Reina Sikkema, Claudia  
Schapendonk, Irina Chestakova, Anne van der Linden, Mark Pronk, Pascal Lexmond, Corien Swaan, Manon Haverkate,  
Madelief Mollers, Mart Stein, Sandra Kengne Kamga Mobou, Jeroen van Kampen, Jolanda Voermans, Aura Timen,  
Corine GeurtsvanKessel, Annemiek van der Eijk, Richard Molenkamp, Marion Koopmans, on behalf of the Dutch  
national COVID-19 response team.

EPI\_ISL\_415465 hCoV-19/Netherlands/NA\_1/2020 Europe / Netherlands 2020-03-10 Dutch COVID-19 response  
team Erasmus Medical Center David Nieuwenhuijse, Bas Oude Munnink, Reina Sikkema, Claudia Schapendonk,  
Irina Chestakova, Anne van der Linden, Mark Pronk, Pascal Lexmond, Corien Swaan, Manon Haverkate, Madelief  
Mollers, Mart Stein, Sandra Kengne Kamga Mobou, Jeroen van Kampen, Jolanda Voermans, Aura Timen, Corine  
GeurtsvanKessel, Annemiek van der Eijk, Richard Molenkamp, Marion Koopmans, on behalf of the Dutch national  
COVID-19 response team.

EPI\_ISL\_415466 hCoV-19/Netherlands/NA\_10/2020 Europe / Netherlands 2020-03-09 Dutch COVID-19 response  
team Erasmus Medical Center David Nieuwenhuijse, Bas Oude Munnink, Reina Sikkema, Claudia Schapendonk,  
Irina Chestakova, Anne van der Linden, Mark Pronk, Pascal Lexmond, Corien Swaan, Manon Haverkate, Madelief





COVID-19 response team.  
 EPI\_ISL\_415492 hCoV-19/Netherlands/NA\_35/2020 Europe / Netherlands 2020-03-10 Dutch COVID-19 response team  
 Erasmus Medical Center David Nieuwenhuijse, Bas Oude Munnink, Reina Sikkema, Claudia Schapendonk, Irina Chestakova, Anne van der Linden, Mark Pronk, Pascal Lexmond, Corien Swaan, Manon Haverkate, Madelief Mollers, Mart Stein, Sandra Kengne Kamga Mobou, Jeroen van Kampen, Jolanda Voermans, Aura Timen, Corine GeurtsvanKessel, Annemiek van der Eijk, Richard Molenkamp, Marion Koopmans, on behalf of the Dutch national COVID-19 response team.

EPI\_ISL\_415493 hCoV-19/Netherlands/NA\_4/2020 Europe / Netherlands 2020 Dutch COVID-19 response team  
 Erasmus Medical Center David Nieuwenhuijse, Bas Oude Munnink, Reina Sikkema, Claudia Schapendonk, Irina Chestakova, Anne van der Linden, Mark Pronk, Pascal Lexmond, Corien Swaan, Manon Haverkate, Madelief Mollers, Mart Stein, Sandra Kengne Kamga Mobou, Jeroen van Kampen, Jolanda Voermans, Aura Timen, Corine GeurtsvanKessel, Annemiek van der Eijk, Richard Molenkamp, Marion Koopmans, on behalf of the Dutch national COVID-19 response team.

EPI\_ISL\_415494 hCoV-19/Netherlands/NA\_5/2020 Europe / Netherlands 2020 Dutch COVID-19 response team  
 Erasmus Medical Center David Nieuwenhuijse, Bas Oude Munnink, Reina Sikkema, Claudia Schapendonk, Irina Chestakova, Anne van der Linden, Mark Pronk, Pascal Lexmond, Corien Swaan, Manon Haverkate, Madelief Mollers, Mart Stein, Sandra Kengne Kamga Mobou, Jeroen van Kampen, Jolanda Voermans, Aura Timen, Corine GeurtsvanKessel, Annemiek van der Eijk, Richard Molenkamp, Marion Koopmans, on behalf of the Dutch national COVID-19 response team.

EPI\_ISL\_415495 hCoV-19/Netherlands/NA\_6/2020 Europe / Netherlands 2020-03-10 Dutch COVID-19 response team  
 Erasmus Medical Center David Nieuwenhuijse, Bas Oude Munnink, Reina Sikkema, Claudia Schapendonk, Irina Chestakova, Anne van der Linden, Mark Pronk, Pascal Lexmond, Corien Swaan, Manon Haverkate, Madelief Mollers, Mart Stein, Sandra Kengne Kamga Mobou, Jeroen van Kampen, Jolanda Voermans, Aura Timen, Corine GeurtsvanKessel, Annemiek van der Eijk, Richard Molenkamp, Marion Koopmans, on behalf of the Dutch national COVID-19 response team.

EPI\_ISL\_415496 hCoV-19/Netherlands/NA\_7/2020 Europe / Netherlands 2020-03-09 Dutch COVID-19 response team  
 Erasmus Medical Center David Nieuwenhuijse, Bas Oude Munnink, Reina Sikkema, Claudia Schapendonk, Irina Chestakova, Anne van der Linden, Mark Pronk, Pascal Lexmond, Corien Swaan, Manon Haverkate, Madelief Mollers, Mart Stein, Sandra Kengne Kamga Mobou, Jeroen van Kampen, Jolanda Voermans, Aura Timen, Corine GeurtsvanKessel, Annemiek van der Eijk, Richard Molenkamp, Marion Koopmans, on behalf of the Dutch national COVID-19 response team.

EPI\_ISL\_415497 hCoV-19/Netherlands/NA\_8/2020 Europe / Netherlands 2020-03-09 Dutch COVID-19 response team  
 Erasmus Medical Center David Nieuwenhuijse, Bas Oude Munnink, Reina Sikkema, Claudia Schapendonk, Irina Chestakova, Anne van der Linden, Mark Pronk, Pascal Lexmond, Corien Swaan, Manon Haverkate, Madelief Mollers, Mart Stein, Sandra Kengne Kamga Mobou, Jeroen van Kampen, Jolanda Voermans, Aura Timen, Corine GeurtsvanKessel, Annemiek van der Eijk, Richard Molenkamp, Marion Koopmans, on behalf of the Dutch national COVID-19 response team.

EPI\_ISL\_415498 hCoV-19/Netherlands/NA\_9/2020 Europe / Netherlands 2020-03-09 Dutch COVID-19 response team  
 Erasmus Medical Center David Nieuwenhuijse, Bas Oude Munnink, Reina Sikkema, Claudia Schapendonk, Irina Chestakova, Anne van der Linden, Mark Pronk, Pascal Lexmond, Corien Swaan, Manon Haverkate, Madelief Mollers, Mart Stein, Sandra Kengne Kamga Mobou, Jeroen van Kampen, Jolanda Voermans, Aura Timen, Corine GeurtsvanKessel, Annemiek van der Eijk, Richard Molenkamp, Marion Koopmans, on behalf of the Dutch national COVID-19 response team.

EPI\_ISL\_415499 hCoV-19/Netherlands/NoordBrabant\_41/2020 Europe / Netherlands / Noord Brabant 2020  
 Dutch COVID-19 response team Erasmus Medical Center David Nieuwenhuijse, Bas Oude Munnink, Reina Sikkema, Claudia Schapendonk, Irina Chestakova, Anne van der Linden, Mark Pronk, Pascal Lexmond, Corien Swaan, Manon Haverkate, Madelief Mollers, Mart Stein, Sandra Kengne Kamga Mobou, Jeroen van Kampen, Jolanda Voermans, Aura Timen, Corine GeurtsvanKessel, Annemiek van der Eijk, Richard Molenkamp, Marion Koopmans, on behalf of the Dutch national COVID-19 response team.

EPI\_ISL\_416400 hCoV-19/Shanghai/SH0112/2020 Asia / China / Shanghai 2020-02-02 Shanghai Public Health Clinical Center, Shanghai Medical College, Fudan University National Research Center for Translational Medicine (Shanghai), Ruijin Hospital affiliated to Shanghai Jiao Tong University School of Medicine & Shanghai Public Health Clinical Center Shengyue Wang, Xiaonan Zhang, Gang Lu, Yun Tan, Yun Ling, Hongzhou Lu, Saijuan Chen

EPI\_ISL\_416401 hCoV-19/Shanghai/SH0114/2020 Asia / China / Shanghai 2020-02-02 Shanghai Public Health Clinical Center, Shanghai Medical College, Fudan University National Research Center for Translational Medicine (Shanghai), Ruijin Hospital affiliated to Shanghai Jiao Tong University School of Medicine & Shanghai Public Health Clinical Center Shengyue Wang, Xiaonan Zhang, Gang Lu, Yun Tan, Yun Ling, Hongzhou Lu, Saijuan Chen

EPI\_ISL\_416402 hCoV-19/Shanghai/SH0115/2020 Asia / China / Shanghai 2020-02-11 Shanghai Public Health Clinical Center, Shanghai Medical College, Fudan University National Research Center for Translational Medicine (Shanghai), Ruijin Hospital affiliated to Shanghai Jiao Tong University School of Medicine & Shanghai Public Health Clinical Center Shengyue Wang, Xiaonan Zhang, Gang Lu, Yun Tan, Yun Ling, Hongzhou Lu, Saijuan Chen

EPI\_ISL\_416403 hCoV-19/Shanghai/SH0117/2020 Asia / China / Shanghai 2020-02-02 Shanghai Public Health Clinical Center, Shanghai Medical College, Fudan University National Research Center for Translational Medicine (Shanghai), Ruijin Hospital affiliated to Shanghai Jiao Tong University School of Medicine & Shanghai Public Health Clinical Center Shengyue Wang, Xiaonan Zhang, Gang Lu, Yun Tan, Yun Ling, Hongzhou Lu, Saijuan Chen

EPI\_ISL\_416404 hCoV-19/Shanghai/SH0119/2020 Asia / China / Shanghai 2020-02-09 Shanghai Public Health

Clinical Center, Shanghai Medical College, Fudan University National Research Center for Translational Medicine (Shanghai), Ruijin Hospital affiliated to Shanghai Jiao Tong University School of Medicine & Shanghai Public Health Clinical Center Shengyue Wang, Xiaonan Zhang, Gang Lu, Yun Tan, Yun Ling, Hongzhou Lu, Saijuan Chen

EPI\_ISL\_416405 hCoV-19/Shanghai/SH0121/2020 Asia / China / Shanghai 2020-02-02 Shanghai Public Health Clinical Center, Shanghai Medical College, Fudan University National Research Center for Translational Medicine (Shanghai), Ruijin Hospital affiliated to Shanghai Jiao Tong University School of Medicine & Shanghai Public Health Clinical Center Shengyue Wang, Xiaonan Zhang, Gang Lu, Yun Tan, Yun Ling, Hongzhou Lu, Saijuan Chen

EPI\_ISL\_416406 hCoV-19/Shanghai/SH0125/2020 Asia / China / Shanghai 2020-02-15 Shanghai Public Health Clinical Center, Shanghai Medical College, Fudan University National Research Center for Translational Medicine (Shanghai), Ruijin Hospital affiliated to Shanghai Jiao Tong University School of Medicine & Shanghai Public Health Clinical Center Shengyue Wang, Xiaonan Zhang, Gang Lu, Yun Tan, Yun Ling, Hongzhou Lu, Saijuan Chen

EPI\_ISL\_416407 hCoV-19/Shanghai/SH0126/2020 Asia / China / Shanghai 2020-02-15 Shanghai Public Health Clinical Center, Shanghai Medical College, Fudan University National Research Center for Translational Medicine (Shanghai), Ruijin Hospital affiliated to Shanghai Jiao Tong University School of Medicine & Shanghai Public Health Clinical Center Shengyue Wang, Xiaonan Zhang, Gang Lu, Yun Tan, Yun Ling, Hongzhou Lu, Saijuan Chen

EPI\_ISL\_416409 hCoV-19/Shanghai/SH0128/2020 Asia / China / Shanghai 2020-02-02 Shanghai Public Health Clinical Center, Shanghai Medical College, Fudan University National Research Center for Translational Medicine (Shanghai), Ruijin Hospital affiliated to Shanghai Jiao Tong University School of Medicine & Shanghai Public Health Clinical Center Shengyue Wang, Xiaonan Zhang, Gang Lu, Yun Tan, Yun Ling, Hongzhou Lu, Saijuan Chen

EPI\_ISL\_416410 hCoV-19/Australia/VIC02/2020 Oceania / Australia / Victoria / Melbourne 2020-01-24 Victorian Infectious Diseases Reference Laboratory (VIDRL) Victorian Infectious Diseases Reference Laboratory and Microbiological Diagnostic Unit Public Health Laboratory, Doherty Institute Caly L., Seemann T., Schultz M., Druce J., Taiaroa, G.

EPI\_ISL\_416411 hCoV-19/Australia/VIC03/2020 Oceania / Australia / Victoria / Melbourne 2020-01-25 Victorian Infectious Diseases Reference Laboratory (VIDRL) Victorian Infectious Diseases Reference Laboratory and Microbiological Diagnostic Unit Public Health Laboratory, Doherty Institute Caly L., Seemann T., Schultz M., Druce J., Taiaroa, G.

EPI\_ISL\_416412 hCoV-19/Australia/VIC04/2020 Oceania / Australia / Victoria / Melbourne 2020-03-02 Victorian Infectious Diseases Reference Laboratory (VIDRL) Victorian Infectious Diseases Reference Laboratory and Microbiological Diagnostic Unit Public Health Laboratory, Doherty Institute Caly L., Seemann T., Schultz M., Druce J., Taiaroa, G.

EPI\_ISL\_416413 hCoV-19/Australia/VIC05/2020 Oceania / Australia / Victoria / Melbourne 2020-03-05 Victorian Infectious Diseases Reference Laboratory (VIDRL) Victorian Infectious Diseases Reference Laboratory and Microbiological Diagnostic Unit Public Health Laboratory, Doherty Institute Caly L., Seemann T., Schultz M., Druce J., Taiaroa, G.

EPI\_ISL\_416415 hCoV-19/Australia/VIC07/2020 Oceania / Australia / Victoria / Melbourne 2020-02-08 Victorian Infectious Diseases Reference Laboratory (VIDRL) Victorian Infectious Diseases Reference Laboratory and Microbiological Diagnostic Unit Public Health Laboratory, Doherty Institute Caly L., Seemann T., Schultz M., Druce J., Taiaroa, G.

EPI\_ISL\_416430 hCoV-19/Vietnam/CM295/2020 Asia / Vietnam / Hanoi 2020-03-06 National Influenza Center, National Institute of Hygiene and Epidemiology (NIHE) National Influenza Center, National Institute of Hygiene and Epidemiology (NIHE) Le Quynh Mai, Taichiro Takemura, Meng Ling Moi, Takeshi Nabeshima, Nguyen Le Khanh Hang, Hoang Vu Mai Phuong, Ung Thi Hong Trang, Le Thi Thanh, Nguyen Vu Son, Vuong Duc Cuong, Pham Thi Hien, Tran Thu Huong, Nguyen Phuong Anh, Pham Hong Quynh Anh, Kouichi Morita, Futoshi Hasebe, Dang Duc Anh

EPI\_ISL\_416431 hCoV-19/Vietnam/CM296/2020 Asia / Vietnam / Hanoi 2020-03-06 National Influenza Center, National Institute of Hygiene and Epidemiology (NIHE) National Influenza Center, National Institute of Hygiene and Epidemiology (NIHE) Le Quynh Mai, Taichiro Takemura, Meng Ling Moi, Takeshi Nabeshima, Nguyen Le Khanh Hang, Hoang Vu Mai Phuong, Ung Thi Hong Trang, Le Thi Thanh, Nguyen Vu Son, Vuong Duc Cuong, Pham Thi Hien, Tran Thu Huong, Nguyen Phuong Anh, Pham Hong Quynh Anh, Kouichi Morita, Futoshi Hasebe, Dang Duc Anh

EPI\_ISL\_416432 hCoV-19/Saudi Arabia/KAIMRC-Alghoribi/2020 Asia / Saudi Arabia / Riyadh 2020-03-07 Clinical Microbiology Lab Infectious Disease Research Department, King Abdullah International Medical Research Center (KAIMRC) Majed Alghoribi, Sadeem Alhayli, Abdulrahman Alswaji, Liliane Okdah, Sameera Al Johani, Michel Doumith

EPI\_ISL\_416433 hCoV-19/USA/WA-UW77/2020 North America / USA / Washington 2020-03-10 UW Virology Lab UW Virology Lab Pavitra Roychoudhury, Hong Xie, Keith Jerome, Alexander Greninger

EPI\_ISL\_416434 hCoV-19/USA/WA-UW78/2020 North America / USA / Washington 2020-03-10 UW Virology Lab UW Virology Lab Pavitra Roychoudhury, Hong Xie, Keith Jerome, Alexander Greninger

EPI\_ISL\_416435 hCoV-19/USA/WA-UW79/2020 North America / USA / Washington 2020-03-10 UW Virology Lab UW Virology Lab Pavitra Roychoudhury, Hong Xie, Keith Jerome, Alexander Greninger

EPI\_ISL\_416436 hCoV-19/USA/WA-UW80/2020 North America / USA / Washington 2020-03-10 UW Virology Lab UW Virology Lab Pavitra Roychoudhury, Hong Xie, Keith Jerome, Alexander Greninger

EPI\_ISL\_416438 hCoV-19/USA/WA-UW82/2020 North America / USA / Washington 2020-03-10 UW Virology Lab UW Virology Lab Pavitra Roychoudhury, Hong Xie, Keith Jerome, Alexander Greninger



|                                                                                                                                                          |                                                                                   |                                                     |            |                     |
|----------------------------------------------------------------------------------------------------------------------------------------------------------|-----------------------------------------------------------------------------------|-----------------------------------------------------|------------|---------------------|
| EPI_ISL_416439                                                                                                                                           | hCoV-19/USA/WA-UW83/2020                                                          | North America / USA / Washington                    | 2020-03-10 | UW                  |
| Virology Lab                                                                                                                                             | UW Virology Lab Pavitra Roychoudhury, Hong Xie, Keith Jerome, Alexander Greninger |                                                     |            |                     |
| EPI_ISL_416440                                                                                                                                           | hCoV-19/USA/WA-UW84/2020                                                          | North America / USA / Washington                    | 2020-03-10 | UW                  |
| Virology Lab                                                                                                                                             | UW Virology Lab Pavitra Roychoudhury, Hong Xie, Keith Jerome, Alexander Greninger |                                                     |            |                     |
| EPI_ISL_416441                                                                                                                                           | hCoV-19/USA/WA-UW85/2020                                                          | North America / USA / Washington                    | 2020-03-10 | UW                  |
| Virology Lab                                                                                                                                             | UW Virology Lab Pavitra Roychoudhury, Hong Xie, Keith Jerome, Alexander Greninger |                                                     |            |                     |
| EPI_ISL_416442                                                                                                                                           | hCoV-19/USA/WA-UW86/2020                                                          | North America / USA / Washington                    | 2020-03-10 | UW                  |
| Virology Lab                                                                                                                                             | UW Virology Lab Pavitra Roychoudhury, Hong Xie, Keith Jerome, Alexander Greninger |                                                     |            |                     |
| EPI_ISL_416443                                                                                                                                           | hCoV-19/USA/WA-UW87/2020                                                          | North America / USA / Washington                    | 2020-03-10 | UW                  |
| Virology Lab                                                                                                                                             | UW Virology Lab Pavitra Roychoudhury, Hong Xie, Keith Jerome, Alexander Greninger |                                                     |            |                     |
| EPI_ISL_416444                                                                                                                                           | hCoV-19/USA/WA-UW88/2020                                                          | North America / USA / Washington                    | 2020-03-10 | UW                  |
| Virology Lab                                                                                                                                             | UW Virology Lab Pavitra Roychoudhury, Hong Xie, Keith Jerome, Alexander Greninger |                                                     |            |                     |
| EPI_ISL_416445                                                                                                                                           | hCoV-19/USA/WA-UW89/2020                                                          | North America / USA / Washington                    | 2020-03-10 | UW                  |
| Virology Lab                                                                                                                                             | UW Virology Lab Pavitra Roychoudhury, Hong Xie, Keith Jerome, Alexander Greninger |                                                     |            |                     |
| EPI_ISL_416446                                                                                                                                           | hCoV-19/USA/WA-UW90/2020                                                          | North America / USA / Washington                    | 2020-03-10 | UW                  |
| Virology Lab                                                                                                                                             | UW Virology Lab Pavitra Roychoudhury, Hong Xie, Keith Jerome, Alexander Greninger |                                                     |            |                     |
| EPI_ISL_416447                                                                                                                                           | hCoV-19/USA/WA-UW91/2020                                                          | North America / USA / Washington                    | 2020-03-10 | UW                  |
| Virology Lab                                                                                                                                             | UW Virology Lab Pavitra Roychoudhury, Hong Xie, Keith Jerome, Alexander Greninger |                                                     |            |                     |
| EPI_ISL_416448                                                                                                                                           | hCoV-19/USA/WA-UW92/2020                                                          | North America / USA / Washington                    | 2020-03-11 | UW                  |
| Virology Lab                                                                                                                                             | UW Virology Lab Pavitra Roychoudhury, Hong Xie, Keith Jerome, Alexander Greninger |                                                     |            |                     |
| EPI_ISL_416449                                                                                                                                           | hCoV-19/USA/WA-UW93/2020                                                          | North America / USA / Washington                    | 2020-03-11 | UW                  |
| Virology Lab                                                                                                                                             | UW Virology Lab Pavitra Roychoudhury, Hong Xie, Keith Jerome, Alexander Greninger |                                                     |            |                     |
| EPI_ISL_416450                                                                                                                                           | hCoV-19/USA/WA-UW94/2020                                                          | North America / USA / Washington                    | 2020-03-11 | UW                  |
| Virology Lab                                                                                                                                             | UW Virology Lab Pavitra Roychoudhury, Hong Xie, Keith Jerome, Alexander Greninger |                                                     |            |                     |
| EPI_ISL_416451                                                                                                                                           | hCoV-19/USA/WA-UW95/2020                                                          | North America / USA / Washington                    | 2020-03-10 | UW                  |
| Virology Lab                                                                                                                                             | UW Virology Lab Pavitra Roychoudhury, Hong Xie, Keith Jerome, Alexander Greninger |                                                     |            |                     |
| EPI_ISL_416452                                                                                                                                           | hCoV-19/USA/WA-UW96/2020                                                          | North America / USA / Washington                    | 2020-03-10 | UW                  |
| Virology Lab                                                                                                                                             | UW Virology Lab Pavitra Roychoudhury, Hong Xie, Keith Jerome, Alexander Greninger |                                                     |            |                     |
| EPI_ISL_416453                                                                                                                                           | hCoV-19/USA/WA-UW36/2020                                                          | North America / USA / Washington                    | 2020-03-07 | UW                  |
| Virology Lab                                                                                                                                             | UW Virology Lab Pavitra Roychoudhury, Hong Xie, Keith Jerome, Alexander Greninger |                                                     |            |                     |
| EPI_ISL_416454                                                                                                                                           | hCoV-19/USA/WA-UW37/2020                                                          | North America / USA / Washington                    | 2020-03-06 | UW                  |
| Virology Lab                                                                                                                                             | UW Virology Lab Pavitra Roychoudhury, Hong Xie, Keith Jerome, Alexander Greninger |                                                     |            |                     |
| EPI_ISL_416455                                                                                                                                           | hCoV-19/USA/WA-UW38/2020                                                          | North America / USA / Washington                    | 2020-03-07 | UW                  |
| Virology Lab                                                                                                                                             | UW Virology Lab Pavitra Roychoudhury, Hong Xie, Keith Jerome, Alexander Greninger |                                                     |            |                     |
| EPI_ISL_416456                                                                                                                                           | hCoV-19/USA/WA-UW39/2020                                                          | North America / USA / Washington                    | 2020-03-06 | UW                  |
| Virology Lab                                                                                                                                             | UW Virology Lab Pavitra Roychoudhury, Hong Xie, Keith Jerome, Alexander Greninger |                                                     |            |                     |
| EPI_ISL_416457                                                                                                                                           | hCoV-19/USA/CA-MG0987/2020                                                        | North America / USA / California / San Diego County | 2020-03-18 | Mark                |
| Andersen Lab, The Scripps Research Institute                                                                                                             | Andersen Lab, The Scripps Research Institute                                      |                                                     |            |                     |
| Zeller, Catie Anderson, Emily Spender, Sarah Topol, Raphaelle Klitting, Refugio Robles-Sikisaka, Karthik Gangavarapu, Laura Nicholson, Kristian Andersen |                                                                                   |                                                     |            |                     |
| EPI_ISL_416458                                                                                                                                           | hCoV-19/Kuwait/KU12/2020                                                          | Asia / Kuwait / Hawali                              | 2020-03-02 | Virology laboratory |
| Ministry of Health Kuwait sequenced at Dasman Diabetes Institute                                                                                         | Dasman Diabetes Institute                                                         |                                                     |            | Fahd                |
| Al-Mulla, Sumi John, Sara Alqabandi, Rasheeba iqbal, Motasem Melhem, Ebaa alOzairi, Qais Al-Duwairi                                                      |                                                                                   |                                                     |            |                     |
| EPI_ISL_416460                                                                                                                                           | hCoV-19/USA/WA-S5/2020                                                            | North America / USA / Washington / King County      | 2020-02-29 | Seattle             |
| Flu Study                                                                                                                                                | Seattle Flu Study                                                                 | Chu et al                                           |            |                     |
| EPI_ISL_416461                                                                                                                                           | hCoV-19/USA/WA-S6/2020                                                            | North America / USA / Washington / King County      | 2020-02-29 | Seattle             |
| Flu Study                                                                                                                                                | Seattle Flu Study                                                                 | Chu et al                                           |            |                     |
| EPI_ISL_416462                                                                                                                                           | hCoV-19/USA/WA-S7/2020                                                            | North America / USA / Washington                    | 2020-02-24 | Seattle Flu         |
| Study                                                                                                                                                    | Seattle Flu Study                                                                 | Chu et al                                           |            |                     |
| EPI_ISL_416465                                                                                                                                           | hCoV-19/USA/WA-S10/2020                                                           | North America / USA / Washington / King County      | 2020-02-29 | Seattle             |
| Flu Study                                                                                                                                                | Seattle Flu Study                                                                 | Chu et al                                           |            |                     |
| EPI_ISL_416466                                                                                                                                           | hCoV-19/USA/WA-S11/2020                                                           | North America / USA / Washington / King County      | 2020-03-03 | Seattle             |
| Flu Study                                                                                                                                                | Seattle Flu Study                                                                 | Chu et al                                           |            |                     |
| EPI_ISL_416467                                                                                                                                           | hCoV-19/Belgium/MTR-03021/2020                                                    | Europe / Belgium / Holsbeek                         | 2020-03-02 | KU Leuven, Bert     |
| Clinical and Epidemiological Virology                                                                                                                    | KU Leuven, Clinical and Epidemiological Virology                                  |                                                     |            |                     |
| Vanmechelen, Tony Wawina, Joan Marti-Carreras, Piet Maes                                                                                                 |                                                                                   |                                                     |            |                     |
| EPI_ISL_416468                                                                                                                                           | hCoV-19/Belgium/GMH-03022/2020                                                    | Europe / Belgium / Holsbeek                         | 2020-03-02 | KU Leuven, Bert     |
| Clinical and Epidemiological Virology                                                                                                                    | KU Leuven, Clinical and Epidemiological Virology                                  |                                                     |            |                     |
| Vanmechelen, Tony Wawina, Joan Marti-Carreras, Piet Maes                                                                                                 |                                                                                   |                                                     |            |                     |
| EPI_ISL_416469                                                                                                                                           | hCoV-19/Belgium/SN-03031/2020                                                     | Europe / Belgium / Kessel-Lo                        | 2020-03-03 | KU Leuven, Bert     |
| Clinical and Epidemiological Virology                                                                                                                    | KU Leuven, Clinical and Epidemiological Virology                                  |                                                     |            |                     |
| Vanmechelen, Tony Wawina, Joan Marti-Carreras, Piet Maes                                                                                                 |                                                                                   |                                                     |            |                     |
| EPI_ISL_416470                                                                                                                                           | hCoV-19/Belgium/DB-03023/2020                                                     | Europe / Belgium / Couthuin                         | 2020-03-02 | KU Leuven, Bert     |
| Clinical and Epidemiological Virology                                                                                                                    | KU Leuven, Clinical and Epidemiological Virology                                  |                                                     |            |                     |
| Vanmechelen, Tony Wawina, Joan Marti-Carreras, Piet Maes                                                                                                 |                                                                                   |                                                     |            |                     |
| EPI_ISL_416471                                                                                                                                           | hCoV-19/Belgium/DBD-03024/2020                                                    | Europe / Belgium / Kessel-Lo                        | 2020-03-02 | KU Leuven, Bert     |
| Clinical and Epidemiological Virology                                                                                                                    | KU Leuven, Clinical and Epidemiological Virology                                  |                                                     |            |                     |
| Vanmechelen, Tony Wawina, Joan Marti-Carreras, Piet Maes                                                                                                 |                                                                                   |                                                     |            |                     |
| EPI_ISL_416472                                                                                                                                           | hCoV-19/Belgium/UMF-03025/2020                                                    | Europe / Belgium / Kessel-Lo                        | 2020-03-02 | KU Leuven, Bert     |
| Clinical and Epidemiological Virology                                                                                                                    | KU Leuven, Clinical and Epidemiological Virology                                  |                                                     |            |                     |

Vanmechelen, Tony Wawina, Joan Marti-Carreras, Piet Maes  
EPI\_ISL\_416473 hCoV-19/Hangzhou/ZJU-08/2020 Asia / China / Hangzhou 2020-01-26 State Key Laboratory  
for Diagnosis and Treatment of Infectious Diseases, National Clinical Research Center for Infectious Diseases,  
First Affiliated Hospital, Zhejiang University School of Medicine, Hangzhou, China 310003 State Key  
Laboratory for Diagnosis and Treatment of Infectious Diseases, National Clinical Research Center for Infectious  
Diseases, First Affiliated Hospital, Zhejiang University School of Medicine, Hangzhou, China 310003  
Hangping Yao, Nanping Wu, Chao Jiang, Xiangyun Lu, Linfang Cheng, Fumin Liu, Zhigang Wu, Haibo Wu, Changzhong  
Jin, Min Zheng, Lanjuan Li

EPI\_ISL\_416474 hCoV-19/Hangzhou/ZJU-09/2020 Asia / China / Hangzhou 2020-01-28 State Key Laboratory  
for Diagnosis and Treatment of Infectious Diseases, National Clinical Research Center for Infectious Diseases,  
First Affiliated Hospital, Zhejiang University School of Medicine, Hangzhou, China 310003 State Key  
Laboratory for Diagnosis and Treatment of Infectious Diseases, National Clinical Research Center for Infectious  
Diseases, First Affiliated Hospital, Zhejiang University School of Medicine, Hangzhou, China 310003  
Hangping Yao, Nanping Wu, Chao Jiang, Xiangyun Lu, Linfang Cheng, Fumin Liu, Zhigang Wu, Haibo Wu, Changzhong  
Jin, Min Zheng, Lanjuan Li

EPI\_ISL\_416475 hCoV-19/Belgium/DBA-03032/2020 Europe / Belgium / Leuven 2020-03-03 KU Leuven,  
Clinical and Epidemiological Virology KU Leuven, Clinical and Epidemiological Virology Bert  
Vanmechelen, Tony Wawina, Joan Marti-Carreras, Piet Maes

EPI\_ISL\_416476 hCoV-19/Belgium/MTR-03026/2020 Europe / Belgium / Holsbeek 2020-03-02 KU Leuven,  
Clinical and Epidemiological Virology KU Leuven, Clinical and Epidemiological Virology Bert  
Vanmechelen, Tony Wawina, Joan Marti-Carreras, Piet Maes

EPI\_ISL\_416477 hCoV-19/Georgia/Tb-390/2020 Asia / Georgia / Tbilisi 2020-03-08 R. G. Lugar  
Center for Public Health Research, National Center for Disease Control and Public Health (NCDC) of Georgia.  
R. G. Lugar Center for Public Health Research, National Center for Disease Control and Public Health (NCDC) of  
Georgia. Marine Murtskhvaladze, Nato Kotaria, Ann Machablashvili, Lela Sabadze, Mari Gavashelidze, Ana  
Papkiauri, Meri Pantsulaia, Gvantsa Brachveli, Tata Imnadze, Tamar Jashiashvili, Tea Tevdoradze, Ketevan  
Sidamonidze, Ekaterine Khmaladze, Ekaterine Zhghenti, Roena Sukhiashvili, Mariam Zakalashvili, Lela Urushadze,  
Magda Dgebuadze, Giorgi Tomashvili, Davit Tsaguria, Ekaterine Zangaladze, Nino Berishvili, Gvantsa Chanturia,  
Adam Kotorashvili, Maia Alkhazashvili, Irma Burjanadze, Anna Kasradze, Khatuna Zakhshvili, Paata Imnadze,  
Aman Gamkrelidze.

EPI\_ISL\_416478 hCoV-19/Georgia/Tb-673/2020 Asia / Georgia / Tbilisi 2020-03-14 R. G. Lugar  
Center for Public Health Research, National Center for Disease Control and Public Health (NCDC) of Georgia.  
R. G. Lugar Center for Public Health Research, National Center for Disease Control and Public Health (NCDC) of  
Georgia. Marine Murtskhvaladze, Nato Kotaria, Ann Machablashvili, Lela Sabadze, Mari Gavashelidze, Ana  
Papkiauri, Meri Pantsulaia, Gvantsa Brachveli, Tata Imnadze, Tamar Jashiashvili, Tea Tevdoradze, Ketevan  
Sidamonidze, Ekaterine Khmaladze, Ekaterine Zhghenti, Roena Sukhiashvili, Mariam Zakalashvili, Lela Urushadze,  
Magda Dgebuadze, Giorgi Tomashvili, Davit Tsaguria, Ekaterine Zangaladze, Nino Berishvili, Gvantsa Chanturia,  
Adam Kotorashvili, Maia Alkhazashvili, Irma Burjanadze, Anna Kasradze, Khatuna Zakhshvili, Paata Imnadze,  
Aman Gamkrelidze.

EPI\_ISL\_416479 hCoV-19/Georgia/Tb-273/2020 Asia / Georgia / Tbilisi 2020-03-05 R. G. Lugar  
Center for Public Health Research, National Center for Disease Control and Public Health (NCDC) of Georgia.  
R. G. Lugar Center for Public Health Research, National Center for Disease Control and Public Health (NCDC) of  
Georgia. Marine Murtskhvaladze, Nato Kotaria, Ann Machablashvili, Lela Sabadze, Mari Gavashelidze, Ana  
Papkiauri, Meri Pantsulaia, Gvantsa Brachveli, Tata Imnadze, Tamar Jashiashvili, Tea Tevdoradze, Ketevan  
Sidamonidze, Ekaterine Khmaladze, Ekaterine Zhghenti, Roena Sukhiashvili, Mariam Zakalashvili, Lela Urushadze,  
Magda Dgebuadze, Giorgi Tomashvili, Davit Tsaguria, Ekaterine Zangaladze, Nino Berishvili, Gvantsa Chanturia,  
Adam Kotorashvili, Maia Alkhazashvili, Irma Burjanadze, Anna Kasradze, Khatuna Zakhshvili, Paata Imnadze,  
Aman Gamkrelidze.

EPI\_ISL\_416480 hCoV-19/Georgia/Tb-537/2020 Asia / Georgia / Tbilisi 2020-03-11 R. G. Lugar  
Center for Public Health Research, National Center for Disease Control and Public Health (NCDC) of Georgia.  
R. G. Lugar Center for Public Health Research, National Center for Disease Control and Public Health (NCDC) of  
Georgia. Ann Machablashvili, Nato Kotaria, Marine Murtskhvaladze, Lela Sabadze, Mari Gavashelidze, Ana  
Papkiauri, Meri Pantsulaia, Gvantsa Brachveli, Tata Imnadze, Tamar Jashiashvili, Tea Tevdoradze, Ketevan  
Sidamonidze, Ekaterine Khmaladze, Ekaterine Zhghenti, Roena Sukhiashvili, Mariam Zakalashvili, Lela Urushadze,  
Magda Dgebuadze, Giorgi Tomashvili, Davit Tsaguria, Ekaterine Zangaladze, Nino Berishvili, Gvantsa Chanturia,  
Adam Kotorashvili, Maia Alkhazashvili, Irma Burjanadze, Anna Kasradze, Khatuna Zakhshvili, Paata Imnadze,  
Aman Gamkrelidze.

EPI\_ISL\_416481 hCoV-19/Georgia/Tb-712/2020 Asia / Georgia / Tbilisi 2020-03-16 R. G. Lugar  
Center for Public Health Research, National Center for Disease Control and Public Health (NCDC) of Georgia.  
R. G. Lugar Center for Public Health Research, National Center for Disease Control and Public Health (NCDC) of  
Georgia. Gvantsa Chanturia, Marine Murtskhvaladze, Nato Kotaria, Ann Machablashvili, Lela Sabadze, Mari  
Gavashelidze, Ana Papkiauri, Meri Pantsulaia, Gvantsa Brachveli, Tata Imnadze, Tamar Jashiashvili, Tea  
Tevdoradze, Ketevan Sidamonidze, Ekaterine Khmaladze, Ekaterine Zhghenti, Roena Sukhiashvili, Mariam  
Zakalashvili, Lela Urushadze, Magda Dgebuadze, Giorgi Tomashvili, Davit Tsaguria, Ekaterine Zangaladze, Nino  
Berishvili, Adam Kotorashvili, Maia Alkhazashvili, Irma Burjanadze, Anna Kasradze, Khatuna Zakhshvili, Paata  
Imnadze, Aman Gamkrelidze.

EPI\_ISL\_416482 hCoV-19/Georgia/Tb/2020 Asia / Georgia / Tbilisi 2020-03-13 R. G. Lugar Center for  
Public Health Research, National Center for Disease Control and Public Health (NCDC) of Georgia. R. G.  
Lugar Center for Public Health Research, National Center for Disease Control and Public Health (NCDC) of  
Georgia. Adam Kotorashvili, Marine Murtskhvaladze, Nato Kotaria, Ann Machablashvili, Lela Sabadze, Mari

Gavashelidze, Ana Papiakauri, Meri Pantsulaia, Gvantsa Brachveli, Tata Imnadze, Tamar Jashiashvili, Tea Tevdoradze, Ketevan Sidamonidze, Ekaterine Khmaladze, Ekaterine Zhghenti, Roena Sukhiashvili, Mariam Zakalashvili, Lela Urushadze, Magda Dgebuadze, Giorgi Tomashvili, Davit Tsaguria, Ekaterine Zangaladze, Nino Berishvili, Gvantsa Chanturia, Maia Alkhazashvili, Irma Burjanadze, Anna Kasradze, Khatuna Zakhshvili, Paata Imnadze, Amiran Gamkrelidze.

EPI\_ISL\_416484 hCoV-19/Spain/Valencia5/2020 Europe / Spain / Comunitat Valenciana / Valencia 2020-02-27 Servicio de Microbiología. Consorcio Hospital General Universitario de Valencia Sequencing and Bioinformatics Service and Molecular Epidemiology Research Group. FISABIO-Public Health Maria Dolores Ocete, Concepcion Gimeno, Giuseppe D'Auria, Griselda De Marco, Neris Garcia-Gonzalez, Maria Alma Bracho, Fernando Gonzalez-Candelas

EPI\_ISL\_416485 hCoV-19/Spain/Valencia6/2020 Europe / Spain / Comunitat Valenciana / Valencia 2020-02-27 Servicio de Microbiología. Consorcio Hospital General Universitario de Valencia Sequencing and Bioinformatics Service and Molecular Epidemiology Research Group. FISABIO-Public Health Griselda De Marco, Neris Garcia-Gonzalez, Maria Alma Bracho, Maria Dolores Ocete, Concepcion Gimeno, Giuseppe D'Auria, Fernando Gonzalez-Candelas

EPI\_ISL\_416486 hCoV-19/Spain/Valencia7/2020 Europe / Spain / Comunitat Valenciana / Valencia 2020-03-02 Servicio de Microbiología. Consorcio Hospital General Universitario de Valencia Sequencing and Bioinformatics Service and Molecular Epidemiology Research Group. FISABIO-Public Health Neris Garcia-Gonzalez, Maria Alma Bracho, Maria Dolores Ocete, Concepcion Gimeno, Giuseppe D'Auria, Griselda De Marco, Fernando Gonzalez-Candelas

EPI\_ISL\_416487 hCoV-19/Spain/Valencia8/2020 Europe / Spain / Comunitat Valenciana / Valencia 2020-03-04 Servicio de Microbiología. Consorcio Hospital General Universitario de Valencia Sequencing and Bioinformatics Service and Molecular Epidemiology Research Group. FISABIO-Public Health Giuseppe D'Auria, Griselda De Marco, Neris Garcia-Gonzalez, Maria Alma Bracho, Maria Dolores Ocete, Concepcion Gimeno, Fernando Gonzalez-Candelas

EPI\_ISL\_416488 hCoV-19/Poland/PL\_P1/2020 Europe / Poland / Zielonogorskie 2020-03-03 ViroGenetics - BSL3 Laboratory of Virology; Human Genome Variation Research Group & Genomics Centre MCB; Bioinformatics Research Group Department of Virology ViroGenetics - BSL3 Laboratory of Virology; Human Genome Variation Research Group & Genomics Centre MCB; Bioinformatics Research Group Department of Virology Aleksandra Milewska, Ewelina Pośpiech, Agata Jarosz, Adrianna Klajmon, Kamila Marszałek, Katarzyna Pancer, Magdalena Rzeczowska, Tomasz Wołkowicz, Katarzyna Zacharczuk, Agnieszka Kołakowska-Kulesza, Natalia Wolaniuk, Ewelina Hallman-Szelińska, Paweł P łabaj, Wojciech Branicki, Krzysztof Pyrc

EPI\_ISL\_416489 hCoV-19/USA/WI-UW-02/2020 North America / USA / Wisconsin / Madison 2020-03-15 University of Wisconsin-Madison AIDS Vaccine Research Laboratories University of Wisconsin-Madison AIDS Vaccine Research Laboratories Gage Moreno, Katarina Braun, et al. AIDS Vaccine Research Laboratories

EPI\_ISL\_416491 hCoV-19/USA/WI-UW-04/2020 North America / USA / Wisconsin / Waunakee 2020-03-15 University of Wisconsin-Madison AIDS Vaccine Research Laboratories University of Wisconsin-Madison AIDS Vaccine Research Laboratories Gage Moreno, Katarina Braun, et al. AIDS Vaccine Research Laboratories

EPI\_ISL\_416492 hCoV-19/USA/WI-UW-05/2020 North America / USA / Wisconsin / Fitchburg 2020-03-15 University of Wisconsin-Madison AIDS Vaccine Research Laboratories University of Wisconsin-Madison AIDS Vaccine Research Laboratories Gage Moreno, Katarina Braun, et al. AIDS Vaccine Research Laboratories

EPI\_ISL\_416493 hCoV-19/France/HF2196/2020 Europe / France / Hauts de France / Château-Thierry 2020-03-08 CH Jean de Navarre Laboratoire de Biologie National Reference Center for Viruses of Respiratory Infections, Institut Pasteur, Paris Mélnie Albert, Marion Barbet, Sylvie Behillil, Méline Bizard, Angela Brisebarre, Flora Donati, Etienne Simon-Lorière, Vincent Enouf, Maud Vanpeene, Sylvie van der Werf

EPI\_ISL\_416494 hCoV-19/France/N2223/2020 Europe / France / Normandie / Rouen 2020-03-04 Centre Hospitalier Universitaire de Rouen Laboratoire de Virologie National Reference Center for Viruses of Respiratory Infections, Institut Pasteur, Paris Mélnie Albert, Marion Barbet, Sylvie Behillil, Méline Bizard, Angela Brisebarre, Flora Donati, Etienne Simon-Lorière, Vincent Enouf, Maud Vanpeene, Sylvie van der Werf, Jean-Christophe Plantier

EPI\_ISL\_416495 hCoV-19/France/HF2234/2020 Europe / France / Hauts de France / Compiègne 2020-03-10 Centre Hospitalier Compiègne Laboratoire de Biologie National Reference Center for Viruses of Respiratory Infections, Institut Pasteur, Paris Mélnie Albert, Marion Barbet, Sylvie Behillil, Méline Bizard, Angela Brisebarre, Flora Donati, Etienne Simon-Lorière, Vincent Enouf, Maud Vanpeene, Sylvie van der Werf, Raulin Olivia

EPI\_ISL\_416496 hCoV-19/France/HF2237/2020 Europe / France / Hauts de France / Compiègne 2020-03-10 Centre Hospitalier Compiègne Laboratoire de Biologie National Reference Center for Viruses of Respiratory Infections, Institut Pasteur, Paris Mélnie Albert, Marion Barbet, Sylvie Behillil, Méline Bizard, Angela Brisebarre, Flora Donati, Etienne Simon-Lorière, Vincent Enouf, Maud Vanpeene, Sylvie van der Werf, Raulin Olivia

EPI\_ISL\_416497 hCoV-19/France/HF2239/2020 Europe / France / Hauts de France / Compiègne 2020-03-10 Centre Hospitalier Compiègne Laboratoire de Biologie National Reference Center for Viruses of Respiratory Infections, Institut Pasteur, Paris Mélnie Albert, Marion Barbet, Sylvie Behillil, Méline Bizard, Angela Brisebarre, Flora Donati, Etienne Simon-Lorière, Vincent Enouf, Maud Vanpeene, Sylvie van der Werf, Raulin Olivia

EPI\_ISL\_416498 hCoV-19/France/IDF2256/2020 Europe / France / Ile de France / Garches 2020-03-11 Institut Médico légal- Hop R. Poincaré National Reference Center for Viruses of Respiratory Infections, Institut Pasteur, Paris Mélnie Albert, Marion Barbet, Sylvie Behillil, Méline Bizard, Angela Brisebarre, Flora Donati, Etienne Simon-Lorière, Vincent Enouf, Maud Vanpeene, Sylvie van der Werf

EPI\_ISL\_416499 hCoV-19/France/IDF2278/2020 Europe / France / Ile de France / Longjumeau 2020-03-11

| LABM GH nord Essonne |                                 | National Reference Center for Viruses of Respiratory Infections, Institut Pasteur, Paris                                                                                |            |    |                                                                                                                                                                                                                                                                                                                               |  |
|----------------------|---------------------------------|-------------------------------------------------------------------------------------------------------------------------------------------------------------------------|------------|----|-------------------------------------------------------------------------------------------------------------------------------------------------------------------------------------------------------------------------------------------------------------------------------------------------------------------------------|--|
|                      |                                 | Mélnie Albert, Marion Barbet, Sylvie Behillil, Méline Bizard, Angela Brisebarre, Flora Donati, Etienne Simon-Lorière, Vincent Enouf, Maud Vanpeene, Sylvie van der Werf |            |    |                                                                                                                                                                                                                                                                                                                               |  |
| EPI_ISL_416700       | hCoV-19/USA/WA-UW162/2020       | North America / USA / Washington                                                                                                                                        | 2020-03-13 | UW | Virology Lab UW Virology Lab Pavitra Roychoudhury, Hong Xie, Keith Jerome, Alexander Greninger                                                                                                                                                                                                                                |  |
| EPI_ISL_416701       | hCoV-19/USA/WA-UW163/2020       | North America / USA / Washington                                                                                                                                        | 2020-03-13 | UW | Virology Lab UW Virology Lab Pavitra Roychoudhury, Hong Xie, Keith Jerome, Alexander Greninger                                                                                                                                                                                                                                |  |
| EPI_ISL_416702       | hCoV-19/USA/WA-UW164/2020       | North America / USA / Washington                                                                                                                                        | 2020-03-13 | UW | Virology Lab UW Virology Lab Pavitra Roychoudhury, Hong Xie, Keith Jerome, Alexander Greninger                                                                                                                                                                                                                                |  |
| EPI_ISL_416703       | hCoV-19/USA/WA-UW165/2020       | North America / USA / Washington                                                                                                                                        | 2020-03-13 | UW | Virology Lab UW Virology Lab Pavitra Roychoudhury, Hong Xie, Keith Jerome, Alexander Greninger                                                                                                                                                                                                                                |  |
| EPI_ISL_416705       | hCoV-19/USA/WA-UW167/2020       | North America / USA / Washington                                                                                                                                        | 2020-03-13 | UW | Virology Lab UW Virology Lab Pavitra Roychoudhury, Hong Xie, Keith Jerome, Alexander Greninger                                                                                                                                                                                                                                |  |
| EPI_ISL_416706       | hCoV-19/USA/WA-UW168/2020       | North America / USA / Washington                                                                                                                                        | 2020-03-13 | UW | Virology Lab UW Virology Lab Pavitra Roychoudhury, Hong Xie, Keith Jerome, Alexander Greninger                                                                                                                                                                                                                                |  |
| EPI_ISL_416707       | hCoV-19/USA/WA-UW169/2020       | North America / USA / Washington                                                                                                                                        | 2020-03-14 | UW | Virology Lab UW Virology Lab Pavitra Roychoudhury, Hong Xie, Keith Jerome, Alexander Greninger                                                                                                                                                                                                                                |  |
| EPI_ISL_416708       | hCoV-19/USA/WA-UW170/2020       | North America / USA / Washington                                                                                                                                        | 2020-03-14 | UW | Virology Lab UW Virology Lab Pavitra Roychoudhury, Hong Xie, Keith Jerome, Alexander Greninger                                                                                                                                                                                                                                |  |
| EPI_ISL_416709       | hCoV-19/USA/WA-UW171/2020       | North America / USA / Washington                                                                                                                                        | 2020-03-13 | UW | Virology Lab UW Virology Lab Pavitra Roychoudhury, Hong Xie, Keith Jerome, Alexander Greninger                                                                                                                                                                                                                                |  |
| EPI_ISL_416710       | hCoV-19/USA/WA-UW172/2020       | North America / USA / Washington                                                                                                                                        | 2020-03-13 | UW | Virology Lab UW Virology Lab Pavitra Roychoudhury, Hong Xie, Keith Jerome, Alexander Greninger                                                                                                                                                                                                                                |  |
| EPI_ISL_416711       | hCoV-19/USA/WA-UW173/2020       | North America / USA / Washington                                                                                                                                        | 2020-03-15 | UW | Virology Lab UW Virology Lab Pavitra Roychoudhury, Hong Xie, Keith Jerome, Alexander Greninger                                                                                                                                                                                                                                |  |
| EPI_ISL_416712       | hCoV-19/USA/WA-UW174/2020       | North America / USA / Washington                                                                                                                                        | 2020-03-14 | UW | Virology Lab UW Virology Lab Pavitra Roychoudhury, Hong Xie, Keith Jerome, Alexander Greninger                                                                                                                                                                                                                                |  |
| EPI_ISL_416713       | hCoV-19/USA/WA-UW175/2020       | North America / USA / Washington                                                                                                                                        | 2020-03-15 | UW | Virology Lab UW Virology Lab Pavitra Roychoudhury, Hong Xie, Keith Jerome, Alexander Greninger                                                                                                                                                                                                                                |  |
| EPI_ISL_416714       | hCoV-19/USA/WA-UW176/2020       | North America / USA / Washington                                                                                                                                        | 2020-03-14 | UW | Virology Lab UW Virology Lab Pavitra Roychoudhury, Hong Xie, Keith Jerome, Alexander Greninger                                                                                                                                                                                                                                |  |
| EPI_ISL_416715       | hCoV-19/USA/WA-UW177/2020       | North America / USA / Washington                                                                                                                                        | 2020-03-15 | UW | Virology Lab UW Virology Lab Pavitra Roychoudhury, Hong Xie, Keith Jerome, Alexander Greninger                                                                                                                                                                                                                                |  |
| EPI_ISL_416716       | hCoV-19/USA/WA-UW178/2020       | North America / USA / Washington                                                                                                                                        | 2020-03-13 | UW | Virology Lab UW Virology Lab Pavitra Roychoudhury, Hong Xie, Keith Jerome, Alexander Greninger                                                                                                                                                                                                                                |  |
| EPI_ISL_416717       | hCoV-19/USA/WA-UW179/2020       | North America / USA / Washington                                                                                                                                        | 2020-03-15 | UW | Virology Lab UW Virology Lab Pavitra Roychoudhury, Hong Xie, Keith Jerome, Alexander Greninger                                                                                                                                                                                                                                |  |
| EPI_ISL_416718       | hCoV-19/USA/WA-UW180/2020       | North America / USA / Washington                                                                                                                                        | 2020-03-14 | UW | Virology Lab UW Virology Lab Pavitra Roychoudhury, Hong Xie, Keith Jerome, Alexander Greninger                                                                                                                                                                                                                                |  |
| EPI_ISL_416719       | hCoV-19/USA/WA-UW181/2020       | North America / USA / Washington                                                                                                                                        | 2020-03-14 | UW | Virology Lab UW Virology Lab Pavitra Roychoudhury, Hong Xie, Keith Jerome, Alexander Greninger                                                                                                                                                                                                                                |  |
| EPI_ISL_416720       | hCoV-19/USA/WA-UW182/2020       | North America / USA / Washington                                                                                                                                        | 2020-03-13 | UW | Virology Lab UW Virology Lab Pavitra Roychoudhury, Hong Xie, Keith Jerome, Alexander Greninger                                                                                                                                                                                                                                |  |
| EPI_ISL_416721       | hCoV-19/USA/WA-UW183/2020       | North America / USA / Washington                                                                                                                                        | 2020-03-13 | UW | Virology Lab UW Virology Lab Pavitra Roychoudhury, Hong Xie, Keith Jerome, Alexander Greninger                                                                                                                                                                                                                                |  |
| EPI_ISL_416722       | hCoV-19/USA/WA-UW184/2020       | North America / USA / Washington                                                                                                                                        | 2020-03-12 | UW | Virology Lab UW Virology Lab Pavitra Roychoudhury, Hong Xie, Keith Jerome, Alexander Greninger                                                                                                                                                                                                                                |  |
| EPI_ISL_416723       | hCoV-19/USA/WA-UW185/2020       | North America / USA / Washington                                                                                                                                        | 2020-03-14 | UW | Virology Lab UW Virology Lab Pavitra Roychoudhury, Hong Xie, Keith Jerome, Alexander Greninger                                                                                                                                                                                                                                |  |
| EPI_ISL_416724       | hCoV-19/USA/WA-UW186/2020       | North America / USA / Washington                                                                                                                                        | 2020-03-13 | UW | Virology Lab UW Virology Lab Pavitra Roychoudhury, Hong Xie, Keith Jerome, Alexander Greninger                                                                                                                                                                                                                                |  |
| EPI_ISL_416725       | hCoV-19/USA/WA-UW187/2020       | North America / USA / Washington                                                                                                                                        | 2020-03-13 | UW | Virology Lab UW Virology Lab Pavitra Roychoudhury, Hong Xie, Keith Jerome, Alexander Greninger                                                                                                                                                                                                                                |  |
| EPI_ISL_416726       | hCoV-19/USA/WA-UW188/2020       | North America / USA / Washington                                                                                                                                        | 2020-03-13 | UW | Virology Lab UW Virology Lab Pavitra Roychoudhury, Hong Xie, Keith Jerome, Alexander Greninger                                                                                                                                                                                                                                |  |
| EPI_ISL_416727       | hCoV-19/USA/WA-UW189/2020       | North America / USA / Washington                                                                                                                                        | 2020-03-13 | UW | Virology Lab UW Virology Lab Pavitra Roychoudhury, Hong Xie, Keith Jerome, Alexander Greninger                                                                                                                                                                                                                                |  |
| EPI_ISL_416728       | hCoV-19/USA/WA-UW190/2020       | North America / USA / Washington                                                                                                                                        | 2020-03-13 | UW | Virology Lab UW Virology Lab Pavitra Roychoudhury, Hong Xie, Keith Jerome, Alexander Greninger                                                                                                                                                                                                                                |  |
| EPI_ISL_416729       | hCoV-19/USA/WA-UW191/2020       | North America / USA / Washington                                                                                                                                        | 2020-03-13 | UW | Virology Lab UW Virology Lab Pavitra Roychoudhury, Hong Xie, Keith Jerome, Alexander Greninger                                                                                                                                                                                                                                |  |
| EPI_ISL_416730       | hCoV-19/England/SHEF-BFCB1/2020 | Europe / United Kingdom / England / South Yorkshire                                                                                                                     | 2020-03-03 |    | Virology Department, Sheffield Teaching Hospitals NHS Foundation Trust Department of Infection, Immunity and Cardiovascular Disease, The Florey Institute, The Medical School, University of Sheffield Thushan de Silva, Matthew Parker, Adri Angyal, Rebecca Brown, Matthew Wyles, Mehmet Yavuz, Mohammad Raza, Cariad Evans |  |
| EPI_ISL_416731       | hCoV-19/England/SHEF-BFCC0/2020 | Europe / United Kingdom / England / Northamptonshire                                                                                                                    | 2020-03-03 |    | Virology Department, Sheffield Teaching Hospitals NHS Foundation Trust Department of Infection, Immunity and Cardiovascular Disease, The Florey Institute, The Medical School, University of Sheffield Thushan de Silva, Matthew Parker, Adri Angyal, Rebecca Brown, Matthew Wyles, Mehmet Yavuz, Mohammad Raza, Cariad Evans |  |
| EPI_ISL_416732       | hCoV-19/England/SHEF-BFCDF/2020 | Europe / United Kingdom / England / London                                                                                                                              | 2020-03-03 |    |                                                                                                                                                                                                                                                                                                                               |  |

Virology Department, Sheffield Teaching Hospitals NHS Foundation Trust Department of Infection, Immunity and Cardiovascular Disease, The Florey Institute, The Medical School, University of Sheffield Thushan de Silva, Matthew Parker, Adri Angyal, Rebecca Brown, Matthew Wyles, Mehmet Yavuz, Mohammad Raza, Cariad Evans  
EPI\_ISL\_416733 hCoV-19/England/SHEF-BFCEE/2020 Europe / United Kingdom / England / South Yorkshire 2020-03-07 Virology Department, Sheffield Teaching Hospitals NHS Foundation Trust Department of Infection, Immunity and Cardiovascular Disease, The Florey Institute, The Medical School, University of Sheffield Thushan de Silva, Matthew Parker, Adri Angyal, Rebecca Brown, Matthew Wyles, Mehmet Yavuz, Mohammad Raza, Cariad Evans  
EPI\_ISL\_416734 hCoV-19/England/SHEF-BFCFD/2020 Europe / United Kingdom / England / South Yorkshire 2020-03-09 Virology Department, Sheffield Teaching Hospitals NHS Foundation Trust Department of Infection, Immunity and Cardiovascular Disease, The Florey Institute, The Medical School, University of Sheffield Thushan de Silva, Matthew Parker, Adri Angyal, Rebecca Brown, Matthew Wyles, Mehmet Yavuz, Mohammad Raza, Cariad Evans  
EPI\_ISL\_416739 hCoV-19/England/SHEF-BFD45/2020 Europe / United Kingdom / England / South Yorkshire 2020-03-09 Virology Department, Sheffield Teaching Hospitals NHS Foundation Trust Department of Infection, Immunity and Cardiovascular Disease, The Florey Institute, The Medical School, University of Sheffield Thushan de Silva, Matthew Parker, Adri Angyal, Rebecca Brown, Matthew Wyles, Mehmet Yavuz, Mohammad Raza, Cariad Evans  
EPI\_ISL\_416740 hCoV-19/England/SHEF-BFD54/2020 Europe / United Kingdom / England / South Yorkshire 2020-03-03 Virology Department, Sheffield Teaching Hospitals NHS Foundation Trust Department of Infection, Immunity and Cardiovascular Disease, The Florey Institute, The Medical School, University of Sheffield Thushan de Silva, Matthew Parker, Adri Angyal, Rebecca Brown, Matthew Wyles, Mehmet Yavuz, Mohammad Raza, Cariad Evans  
EPI\_ISL\_416741 hCoV-19/Lithuania/ChVir1632/2020 Europe / Lithuania / Vilnius 2020-02 National Public Health Surveillance Laboratory, Vilnius, Lithuania Charite Universitaetsmedizin Berlin, Institute of Virology  
Victor M Corman, Julia Schneider, Jörn Beheim-Schwarzbach, Talitha Veith, Barbara Muehlemann, Terry Jones, Ana Steponkiene, Christian Drosten  
EPI\_ISL\_416742 hCoV-19/Czech Republic/ChVir1630/2020 Europe / Czech Republic / Prague 2020-02-29 NRL for Influenza, Centrum Epidemiology and Microbiology of National Institute of Public Health, Czech Republic  
Charite Universitaetsmedizin Berlin, Institute of Virology Victor M Corman, Julia Schneider, Jörn Beheim-Schwarzbach, Talitha Veith, Barbara Muehlemann, Terry Jones, Akexander Nagy, Jaromira Vecerova, Dusan Trnka, Ludmila Novakova, Helena Jirincova, Christian Drosten  
EPI\_ISL\_416743 hCoV-19/Czech Republic/ChVir1912/2020 Europe / Czech Republic / Prague 2020-03-05 NRL for Influenza, Centrum Epidemiology and Microbiology of National Institute of Public Health, Czech Republic  
Charite Universitaetsmedizin Berlin, Institute of Virology Victor M Corman, Julia Schneider, Jörn Beheim-Schwarzbach, Talitha Veith, Barbara Muehlemann, Terry Jones, Akexander Nagy, Jaromira Vecerova, Dusan Trnka, Ludmila Novakova, Helena Jirincova, Christian Drosten  
EPI\_ISL\_416744 hCoV-19/Hungary/mbl49/2020 Europe / Hungary / Baranya 2020-03-20 Virological Research Group, Szentágothai Research Centre Bioinformatics Research Group, Szentágothai Research Centre  
Péter Urbán, Endre Gábor Tóth, Gábor Kemenesi, Róbert Herczeg, Attila Gyenesei, Ferenc Jakab  
EPI\_ISL\_416745 hCoV-19/France/Pollionay\_1733/2020 Europe / France / ARA 2020-03-10 CNR Virus des Infections Respiratoires - France SUD CNR Virus des Infections Respiratoires - France SUD Bal, Antonin; Destras, Gregory; Gaymard, Alexandre; Bouscambert-Duchamp, Maude; Cheynet, Valérie; Brengel-Pesce, Karen; Morfin-Sherpa, Florence; Valette, Martine; Josset, Laurence; Lina, Bruno.  
EPI\_ISL\_416746 hCoV-19/France/Valence\_425/2020 Europe / France / ARA 2020-03-03 CNR Virus des Infections Respiratoires - France SUD Bal, Antonin; Destras, Gregory; Gaymard, Alexandre; Bouscambert-Duchamp, Maude; Cheynet, Valérie; Brengel-Pesce, Karen; Morfin-Sherpa, Florence; Valette, Martine; Josset, Laurence; Lina, Bruno.  
EPI\_ISL\_416747 hCoV-19/France/Lyon\_487/2020 Europe / France / ARA 2020-03-04 Institut des Agents Infectieux (IAI) Hospices Civils de Lyon CNR Virus des Infections Respiratoires - France SUD Bal, Antonin; Destras, Gregory; Gaymard, Alexandre; Bouscambert-Duchamp, Maude; Cheynet, Valérie; Brengel-Pesce, Karen; Morfin-Sherpa, Florence; Valette, Martine; Josset, Laurence; Lina, Bruno.  
EPI\_ISL\_416748 hCoV-19/France/Lyon\_508/2020 Europe / France / ARA 2020-03-04 Institut des Agents Infectieux (IAI) Hospices Civils de Lyon CNR Virus des Infections Respiratoires - France SUD Bal, Antonin; Destras, Gregory; Gaymard, Alexandre; Bouscambert-Duchamp, Maude; Cheynet, Valérie; Brengel-Pesce, Karen; Morfin-Sherpa, Florence; Valette, Martine; Josset, Laurence; Lina, Bruno.  
EPI\_ISL\_416749 hCoV-19/France/Valence\_532/2020 Europe / France / ARA 2020-03-04 Centre Hospitalier de Valence CNR Virus des Infections Respiratoires - France SUD Bal, Antonin; Destras, Gregory; Gaymard, Alexandre; Bouscambert-Duchamp, Maude; Cheynet, Valérie; Brengel-Pesce, Karen; Morfin-Sherpa, Florence; Valette, Martine; Josset, Laurence; Lina, Bruno.  
EPI\_ISL\_416750 hCoV-19/France/Lyon\_683/2020 Europe / France / ARA 2020-03-06 Institut des Agents Infectieux (IAI) Hospices Civils de Lyon CNR Virus des Infections Respiratoires - France SUD Bal, Antonin; Destras, Gregory; Gaymard, Alexandre; Bouscambert-Duchamp, Maude; Cheynet, Valérie; Brengel-Pesce, Karen; Morfin-Sherpa, Florence; Valette, Martine; Josset, Laurence; Lina, Bruno.  
EPI\_ISL\_416751 hCoV-19/France/Clermont-Ferrand\_651/2020 Europe / France / ARA 2020-03-05 CHU Gabriel Montpied CNR Virus des Infections Respiratoires - France SUD Bal, Antonin; Destras, Gregory; Gaymard, Alexandre; Bouscambert-Duchamp, Maude; Cheynet, Valérie; Brengel-Pesce, Karen; Morfin-Sherpa, Florence; Valette, Martine; Josset, Laurence; Lina, Bruno.  
EPI\_ISL\_416752 hCoV-19/France/Clermont-Ferrand\_650/2020 Europe / France / ARA 2020-03-04 CHU Gabriel Montpied CNR Virus des Infections Respiratoires - France SUD Bal, Antonin; Destras, Gregory; Gaymard, Alexandre; Bouscambert-Duchamp, Maude; Cheynet, Valérie; Brengel-Pesce, Karen; Morfin-Sherpa, Florence; Valette, Martine; Josset, Laurence; Lina, Bruno.  
EPI\_ISL\_416753 hCoV-19/France/Lyon\_06464 /2020 Europe / France / ARA 2020-03-06 Institut des Agents Infectieux (IAI) Hospices Civils de Lyon CNR Virus des Infections Respiratoires - France SUD Bal,

Antonin; Destras, Gregory; Gaynard, Alexandre; Bouscambert-Duchamp, Maude; Cheynet, Valérie; Brengel-Pesce, Karen; Morfin-Sherpa, Florence; Valette, Martine; Josset, Laurence; Lina, Bruno.

EPI\_ISL\_416754 hCoV-19/France/Lyon\_06487/2020 Europe / France / ARA 2020-03-06 Institut des Agents Infectieux (IAI) Hospices Civils de Lyon CNR Virus des Infections Respiratoires - France SUD Bal, Antonin; Destras, Gregory; Gaynard, Alexandre; Bouscambert-Duchamp, Maude; Cheynet, Valérie; Brengel-Pesce, Karen; Morfin-Sherpa, Florence; Valette, Martine; Josset, Laurence; Lina, Bruno.

EPI\_ISL\_416756 hCoV-19/France/Lyon\_06531/2020 Europe / France / ARA 2020-03-06 Institut des Agents Infectieux (IAI) Hospices Civils de Lyon CNR Virus des Infections Respiratoires - France SUD Bal, Antonin; Destras, Gregory; Gaynard, Alexandre; Bouscambert-Duchamp, Maude; Cheynet, Valérie; Brengel-Pesce, Karen; Morfin-Sherpa, Florence; Valette, Martine; Josset, Laurence; Lina, Bruno.

EPI\_ISL\_416757 hCoV-19/France/Bourg-en-Bresse\_06678/2020 Europe / France / ARA 2020-03-07 Centre Hospitalier de Bourg en Bresse CNR Virus des Infections Respiratoires - France SUD Bal, Antonin; Destras, Gregory; Gaynard, Alexandre; Bouscambert-Duchamp, Maude; Cheynet, Valérie; Brengel-Pesce, Karen; Morfin-Sherpa, Florence; Valette, Martine; Josset, Laurence; Lina, Bruno.

EPI\_ISL\_416758 hCoV-19/France/Lyon\_0693/2020 Europe / France / ARA 2020-03-08 Institut des Agents Infectieux (IAI) Hospices Civils de Lyon CNR Virus des Infections Respiratoires - France SUD Bal, Antonin; Destras, Gregory; Gaynard, Alexandre; Bouscambert-Duchamp, Maude; Cheynet, Valérie; Brengel-Pesce, Karen; Morfin-Sherpa, Florence; Valette, Martine; Josset, Laurence; Lina, Bruno.

EPI\_ISL\_417700 hCoV-19/Iceland/173/2020 Europe / Iceland / Reykjavik 2020-03-15 The National University Hospital of Iceland deCODE genetics Daniel F Gudbjartsson; Agnar Helgason; Hakon Jonsson; Olafur T Magnusson; Pall Melsted; Gudmundur L Norddahl; Jona Saemundsdottir; Asgeir Sigurdsson; Patrick Sulem; Arna B Agustsdottir; Berglind Eiriksdottir; Run Fridriksdottir; Elisabet E Gardarsdottir; Gudmundur Georgsson; Olafia S Gretarsdottir; Kjartan R Gudmundsson; Thora R Gunnarsdottir; Arnaldur Gylfason; Hilma Holm; Brynjar O Jensson; Aslaug Jonasdottir; Kamilla S Josefsdottir; Thordur Kristjansson; Droplaug N Magnusdottir; Louise le Roux; Gudrun Sigmundsdottir; Gardar Sveinbjornsson; Kristin E Sveinsdottir; Maney Sveinsdottir; Emil A Thorarensen; Bjarni Thorbjornsson; Gisli Masson; Ingileif Jonsdottir; Alma Moller; Thorolfur Gudnason; Karl G Kristinsson; Unnur Thorsteinsdottir; Kari Stefansson

EPI\_ISL\_417701 hCoV-19/Iceland/74/2020 Europe / Iceland / Reykjavik 2020-03-09 The National University Hospital of Iceland deCODE genetics Daniel F Gudbjartsson; Agnar Helgason; Hakon Jonsson; Olafur T Magnusson; Pall Melsted; Gudmundur L Norddahl; Jona Saemundsdottir; Asgeir Sigurdsson; Patrick Sulem; Arna B Agustsdottir; Berglind Eiriksdottir; Run Fridriksdottir; Elisabet E Gardarsdottir; Gudmundur Georgsson; Olafia S Gretarsdottir; Kjartan R Gudmundsson; Thora R Gunnarsdottir; Arnaldur Gylfason; Hilma Holm; Brynjar O Jensson; Aslaug Jonasdottir; Kamilla S Josefsdottir; Thordur Kristjansson; Droplaug N Magnusdottir; Louise le Roux; Gudrun Sigmundsdottir; Gardar Sveinbjornsson; Kristin E Sveinsdottir; Maney Sveinsdottir; Emil A Thorarensen; Bjarni Thorbjornsson; Gisli Masson; Ingileif Jonsdottir; Alma Moller; Thorolfur Gudnason; Karl G Kristinsson; Unnur Thorsteinsdottir; Kari Stefansson

EPI\_ISL\_417702 hCoV-19/Iceland/33/2020 Europe / Iceland / Reykjavik 2020-03-03 The National University Hospital of Iceland deCODE genetics Daniel F Gudbjartsson; Agnar Helgason; Hakon Jonsson; Olafur T Magnusson; Pall Melsted; Gudmundur L Norddahl; Jona Saemundsdottir; Asgeir Sigurdsson; Patrick Sulem; Arna B Agustsdottir; Berglind Eiriksdottir; Run Fridriksdottir; Elisabet E Gardarsdottir; Gudmundur Georgsson; Olafia S Gretarsdottir; Kjartan R Gudmundsson; Thora R Gunnarsdottir; Arnaldur Gylfason; Hilma Holm; Brynjar O Jensson; Aslaug Jonasdottir; Kamilla S Josefsdottir; Thordur Kristjansson; Droplaug N Magnusdottir; Louise le Roux; Gudrun Sigmundsdottir; Gardar Sveinbjornsson; Kristin E Sveinsdottir; Maney Sveinsdottir; Emil A Thorarensen; Bjarni Thorbjornsson; Gisli Masson; Ingileif Jonsdottir; Alma Moller; Thorolfur Gudnason; Karl G Kristinsson; Unnur Thorsteinsdottir; Kari Stefansson

EPI\_ISL\_417703 hCoV-19/Iceland/179/2020 Europe / Iceland / Reykjavik 2020-03-16 The National University Hospital of Iceland deCODE genetics Daniel F Gudbjartsson; Agnar Helgason; Hakon Jonsson; Olafur T Magnusson; Pall Melsted; Gudmundur L Norddahl; Jona Saemundsdottir; Asgeir Sigurdsson; Patrick Sulem; Arna B Agustsdottir; Berglind Eiriksdottir; Run Fridriksdottir; Elisabet E Gardarsdottir; Gudmundur Georgsson; Olafia S Gretarsdottir; Kjartan R Gudmundsson; Thora R Gunnarsdottir; Arnaldur Gylfason; Hilma Holm; Brynjar O Jensson; Aslaug Jonasdottir; Kamilla S Josefsdottir; Thordur Kristjansson; Droplaug N Magnusdottir; Louise le Roux; Gudrun Sigmundsdottir; Gardar Sveinbjornsson; Kristin E Sveinsdottir; Maney Sveinsdottir; Emil A Thorarensen; Bjarni Thorbjornsson; Gisli Masson; Ingileif Jonsdottir; Alma Moller; Thorolfur Gudnason; Karl G Kristinsson; Unnur Thorsteinsdottir; Kari Stefansson

EPI\_ISL\_417705 hCoV-19/Iceland/65/2020 Europe / Iceland / Reykjavik 2020-03-07 The National University Hospital of Iceland deCODE genetics Daniel F Gudbjartsson; Agnar Helgason; Hakon Jonsson; Olafur T Magnusson; Pall Melsted; Gudmundur L Norddahl; Jona Saemundsdottir; Asgeir Sigurdsson; Patrick Sulem; Arna B Agustsdottir; Berglind Eiriksdottir; Run Fridriksdottir; Elisabet E Gardarsdottir; Gudmundur Georgsson; Olafia S Gretarsdottir; Kjartan R Gudmundsson; Thora R Gunnarsdottir; Arnaldur Gylfason; Hilma Holm; Brynjar O Jensson; Aslaug Jonasdottir; Kamilla S Josefsdottir; Thordur Kristjansson; Droplaug N Magnusdottir; Louise le Roux; Gudrun Sigmundsdottir; Gardar Sveinbjornsson; Kristin E Sveinsdottir; Maney Sveinsdottir; Emil A Thorarensen; Bjarni Thorbjornsson; Gisli Masson; Ingileif Jonsdottir; Alma Moller; Thorolfur Gudnason; Karl G Kristinsson; Unnur Thorsteinsdottir; Kari Stefansson

EPI\_ISL\_417706 hCoV-19/Iceland/199/2020 Europe / Iceland / Reykjavik 2020-03-16 The National University Hospital of Iceland deCODE genetics Daniel F Gudbjartsson; Agnar Helgason; Hakon Jonsson; Olafur T Magnusson; Pall Melsted; Gudmundur L Norddahl; Jona Saemundsdottir; Asgeir Sigurdsson; Patrick Sulem; Arna B Agustsdottir; Berglind Eiriksdottir; Run Fridriksdottir; Elisabet E Gardarsdottir; Gudmundur Georgsson; Olafia S Gretarsdottir; Kjartan R Gudmundsson; Thora R Gunnarsdottir; Arnaldur Gylfason; Hilma Holm; Brynjar O Jensson; Aslaug Jonasdottir; Kamilla S Josefsdottir; Thordur Kristjansson; Droplaug N Magnusdottir; Louise le Roux; Gudrun Sigmundsdottir; Gardar Sveinbjornsson; Kristin E Sveinsdottir; Maney Sveinsdottir; Emil A



















|                |                               |                                |            |                                                                                                                                        |                                                                                                                                                                                                                                                                                                                                                                                                                                                                                                                                                                                                                                                                                                                                                                                            |
|----------------|-------------------------------|--------------------------------|------------|----------------------------------------------------------------------------------------------------------------------------------------|--------------------------------------------------------------------------------------------------------------------------------------------------------------------------------------------------------------------------------------------------------------------------------------------------------------------------------------------------------------------------------------------------------------------------------------------------------------------------------------------------------------------------------------------------------------------------------------------------------------------------------------------------------------------------------------------------------------------------------------------------------------------------------------------|
| EPI_ISL_417797 | hCoV-19/Iceland/147/2020      | Europe / Iceland / Reykjavik   | 2020-03-13 | The National University Hospital of Iceland deCODE genetics                                                                            | Daniel F Gudbjartsson; Agnar Helgason; Hakon Jonsson; Olafur T Magnusson; Pall Melsted; Gudmundur L Norddahl; Jona Saemundsdottir; Asgeir Sigurdsson; Patrick Sulem; Arna B Agustsdottir; Berglind Eiriksdottir; Run Fridriksdottir; Elisabet E Gardarsdottir; Gudmundur Georgsson; Olafia S Gretarsdottir; Kjartan R Gudmundsson; Thora R Gunnarsdottir; Arnaldur Gylfason; Hilma Holm; Brynjar O Jensson; Aslaug Jonasdottir; Kamilla S Josefsdottir; Thordur Kristjansson; Droplaug N Magnusdottir; Louise le Roux; Gudrun Sigmundsdottir; Gardar Sveinbjornsson; Kristin E Sveinsdottir; Maney Sveinsdottir; Emil A Thorarensen; Bjarni Thorbjornsson; Gisli Masson; Ingileif Jonsdottir; Alma Moller; Thorolfur Gudnason; Karl G Kristinsson; Unnur Thorsteinsdottir; Kari Stefansson |
| EPI_ISL_417798 | hCoV-19/Iceland/148/2020      | Europe / Iceland / Reykjavik   | 2020-03-13 | The National University Hospital of Iceland deCODE genetics                                                                            | Daniel F Gudbjartsson; Agnar Helgason; Hakon Jonsson; Olafur T Magnusson; Pall Melsted; Gudmundur L Norddahl; Jona Saemundsdottir; Asgeir Sigurdsson; Patrick Sulem; Arna B Agustsdottir; Berglind Eiriksdottir; Run Fridriksdottir; Elisabet E Gardarsdottir; Gudmundur Georgsson; Olafia S Gretarsdottir; Kjartan R Gudmundsson; Thora R Gunnarsdottir; Arnaldur Gylfason; Hilma Holm; Brynjar O Jensson; Aslaug Jonasdottir; Kamilla S Josefsdottir; Thordur Kristjansson; Droplaug N Magnusdottir; Louise le Roux; Gudrun Sigmundsdottir; Gardar Sveinbjornsson; Kristin E Sveinsdottir; Maney Sveinsdottir; Emil A Thorarensen; Bjarni Thorbjornsson; Gisli Masson; Ingileif Jonsdottir; Alma Moller; Thorolfur Gudnason; Karl G Kristinsson; Unnur Thorsteinsdottir; Kari Stefansson |
| EPI_ISL_417799 | hCoV-19/Iceland/149/2020      | Europe / Iceland / Reykjavik   | 2020-03-13 | The National University Hospital of Iceland deCODE genetics                                                                            | Daniel F Gudbjartsson; Agnar Helgason; Hakon Jonsson; Olafur T Magnusson; Pall Melsted; Gudmundur L Norddahl; Jona Saemundsdottir; Asgeir Sigurdsson; Patrick Sulem; Arna B Agustsdottir; Berglind Eiriksdottir; Run Fridriksdottir; Elisabet E Gardarsdottir; Gudmundur Georgsson; Olafia S Gretarsdottir; Kjartan R Gudmundsson; Thora R Gunnarsdottir; Arnaldur Gylfason; Hilma Holm; Brynjar O Jensson; Aslaug Jonasdottir; Kamilla S Josefsdottir; Thordur Kristjansson; Droplaug N Magnusdottir; Louise le Roux; Gudrun Sigmundsdottir; Gardar Sveinbjornsson; Kristin E Sveinsdottir; Maney Sveinsdottir; Emil A Thorarensen; Bjarni Thorbjornsson; Gisli Masson; Ingileif Jonsdottir; Alma Moller; Thorolfur Gudnason; Karl G Kristinsson; Unnur Thorsteinsdottir; Kari Stefansson |
| EPI_ISL_420000 | hCoV-19/Australia/VIC309/2020 | Oceania / Australia / Victoria | 2020-03-23 | Microbiological Diagnostic Unit Public Health Laboratory                                                                               | Seemann T., Schultz M., Sait, M., Sherry, N.                                                                                                                                                                                                                                                                                                                                                                                                                                                                                                                                                                                                                                                                                                                                               |
| EPI_ISL_420001 | hCoV-19/Australia/VIC310/2020 | Oceania / Australia / Victoria | 2020-03-23 | Microbiological Diagnostic Unit Public Health Laboratory                                                                               | Seemann T., Schultz M., Sait, M., Sherry, N.                                                                                                                                                                                                                                                                                                                                                                                                                                                                                                                                                                                                                                                                                                                                               |
| EPI_ISL_420002 | hCoV-19/Australia/VIC311/2020 | Oceania / Australia / Victoria | 2020-03-23 | Microbiological Diagnostic Unit Public Health Laboratory                                                                               | Seemann T., Schultz M., Sait, M., Sherry, N.                                                                                                                                                                                                                                                                                                                                                                                                                                                                                                                                                                                                                                                                                                                                               |
| EPI_ISL_420003 | hCoV-19/Australia/VIC312/2020 | Oceania / Australia / Victoria | 2020-03-23 | Microbiological Diagnostic Unit Public Health Laboratory                                                                               | Seemann T., Schultz M., Sait, M., Sherry, N.                                                                                                                                                                                                                                                                                                                                                                                                                                                                                                                                                                                                                                                                                                                                               |
| EPI_ISL_420004 | hCoV-19/Australia/VIC313/2020 | Oceania / Australia / Victoria | 2020-03-24 | Victorian Infectious Diseases Reference Laboratory (VIDRL) Microbiological Diagnostic Unit Public Health Laboratory, Doherty Institute | Caly L., Seemann T., Sait, M., Schultz M., Druce J., Sherry, N.                                                                                                                                                                                                                                                                                                                                                                                                                                                                                                                                                                                                                                                                                                                            |
| EPI_ISL_420005 | hCoV-19/Australia/VIC314/2020 | Oceania / Australia / Victoria | 2020-03-24 | Victorian Infectious Diseases Reference Laboratory (VIDRL) Microbiological Diagnostic Unit Public Health Laboratory, Doherty Institute | Caly L., Seemann T., Sait, M., Schultz M., Druce J., Sherry, N.                                                                                                                                                                                                                                                                                                                                                                                                                                                                                                                                                                                                                                                                                                                            |
| EPI_ISL_420006 | hCoV-19/Australia/VIC315/2020 | Oceania / Australia / Victoria | 2020-03-24 | Microbiological Diagnostic Unit Public Health Laboratory                                                                               | Seemann T., Schultz M., Sait, M., Sherry, N.                                                                                                                                                                                                                                                                                                                                                                                                                                                                                                                                                                                                                                                                                                                                               |
| EPI_ISL_420007 | hCoV-19/Australia/VIC316/2020 | Oceania / Australia / Victoria | 2020-03-24 | Microbiological Diagnostic Unit Public Health Laboratory                                                                               | Seemann T., Schultz M., Sait, M., Sherry, N.                                                                                                                                                                                                                                                                                                                                                                                                                                                                                                                                                                                                                                                                                                                                               |
| EPI_ISL_420008 | hCoV-19/Australia/VIC317/2020 | Oceania / Australia / Victoria | 2020-03-24 | Microbiological Diagnostic Unit Public Health Laboratory                                                                               | Seemann T., Schultz M., Sait, M., Sherry, N.                                                                                                                                                                                                                                                                                                                                                                                                                                                                                                                                                                                                                                                                                                                                               |
| EPI_ISL_420009 | hCoV-19/Australia/VIC318/2020 | Oceania / Australia / Victoria | 2020-03-24 | Microbiological Diagnostic Unit Public Health Laboratory                                                                               | Seemann T., Schultz M., Sait, M., Sherry, N.                                                                                                                                                                                                                                                                                                                                                                                                                                                                                                                                                                                                                                                                                                                                               |
| EPI_ISL_420010 | hCoV-19/Australia/VIC319/2020 | Oceania / Australia / Victoria | 2020-03-24 | Microbiological Diagnostic Unit Public Health Laboratory                                                                               | Seemann T., Schultz M., Sait, M., Sherry, N.                                                                                                                                                                                                                                                                                                                                                                                                                                                                                                                                                                                                                                                                                                                                               |
| EPI_ISL_420011 | hCoV-19/Australia/VIC320/2020 | Oceania / Australia / Victoria | 2020-03-24 | Microbiological Diagnostic Unit Public Health Laboratory                                                                               | Seemann T., Schultz M., Sait, M., Sherry, N.                                                                                                                                                                                                                                                                                                                                                                                                                                                                                                                                                                                                                                                                                                                                               |
| EPI_ISL_420012 | hCoV-19/Australia/VIC321/2020 | Oceania / Australia / Victoria | 2020-03-24 | Microbiological Diagnostic Unit Public Health Laboratory                                                                               | Seemann T., Schultz M., Sait, M., Sherry, N.                                                                                                                                                                                                                                                                                                                                                                                                                                                                                                                                                                                                                                                                                                                                               |
| EPI_ISL_420013 | hCoV-19/Australia/VIC322/2020 | Oceania / Australia / Victoria | 2020-03-24 | Microbiological Diagnostic Unit Public Health Laboratory                                                                               | Seemann T., Schultz M., Sait, M., Sherry, N.                                                                                                                                                                                                                                                                                                                                                                                                                                                                                                                                                                                                                                                                                                                                               |

|                                              |                |                                  |                                   |            |                                                                                                                                         |
|----------------------------------------------|----------------|----------------------------------|-----------------------------------|------------|-----------------------------------------------------------------------------------------------------------------------------------------|
| Seemann T., Schultz M., Sait, M., Sherry, N. | EPI_ISL_420014 | hCoV-19/Australia/VIC323/2020    | Oceania / Australia / Victoria    | 2020-03-24 | Microbiological Diagnostic Unit Public Health Laboratory                                                                                |
| Seemann T., Schultz M., Sait, M., Sherry, N. | EPI_ISL_421225 | hCoV-19/Hangzhou/HZCDC0135/2020  | Asia / China / Hangzhou           | 2020-01-22 | Hangzhou Center for Diseases Control and Prevention                                                                                     |
|                                              |                |                                  |                                   |            | Jun Li, Haoqiu Wang, Lingfeng Mao, Hua Yu, Xinfen Yu, Zhou Sun, Xin Qian, Shuchang Chen, Junfang Chen, Xuchu Wang                       |
|                                              | EPI_ISL_421226 | hCoV-19/Hangzhou/HZCDC0119/2020  | Asia / China / Hangzhou           | 2020-01-22 | Hangzhou Center for Diseases Control and Prevention                                                                                     |
|                                              |                |                                  |                                   |            | Jun Li, Haoqiu Wang, Lingfeng Mao, Hua Yu, Xinfen Yu, Zhou Sun, Xin Qian, Shuchang Chen, Junfang Chen, Xuchu Wang                       |
|                                              | EPI_ISL_421227 | hCoV-19/Hangzhou/HZCDC0091L/2020 | Asia / China / Hangzhou           | 2020-01-21 | Hangzhou Center for Diseases Control and Prevention                                                                                     |
|                                              |                |                                  |                                   |            | Jun Li, Haoqiu Wang, Lingfeng Mao, Hua Yu, Xinfen Yu, Zhou Sun, Xin Qian, Shuchang Chen, Junfang Chen, Xuchu Wang                       |
|                                              | EPI_ISL_421228 | hCoV-19/Hangzhou/HZCDC0091/2020  | Asia / China / Hangzhou           | 2020-01-21 | Hangzhou Center for Diseases Control and Prevention                                                                                     |
|                                              |                |                                  |                                   |            | Jun Li, Haoqiu Wang, Lingfeng Mao, Hua Yu, Xinfen Yu, Zhou Sun, Xin Qian, Shuchang Chen, Junfang Chen, Xuchu Wang                       |
|                                              | EPI_ISL_421229 | hCoV-19/Hangzhou/HZCDC0090L/2020 | Asia / China / Hangzhou           | 2020-01-21 | Hangzhou Center for Diseases Control and Prevention                                                                                     |
|                                              |                |                                  |                                   |            | Jun Li, Haoqiu Wang, Lingfeng Mao, Hua Yu, Xinfen Yu, Zhou Sun, Xin Qian, Shuchang Chen, Junfang Chen, Xuchu Wang                       |
|                                              | EPI_ISL_421230 | hCoV-19/Hangzhou/HZCDC0090/2020  | Asia / China / Hangzhou           | 2020-01-21 | Hangzhou Center for Diseases Control and Prevention                                                                                     |
|                                              |                |                                  |                                   |            | Jun Li, Haoqiu Wang, Lingfeng Mao, Hua Yu, Xinfen Yu, Zhou Sun, Xin Qian, Shuchang Chen, Junfang Chen, Xuchu Wang                       |
|                                              | EPI_ISL_421231 | hCoV-19/Hangzhou/HZCDC0049L/2020 | Asia / China / Hangzhou           | 2020-01-21 | Hangzhou Center for Diseases Control and Prevention                                                                                     |
|                                              |                |                                  |                                   |            | Jun Li, Haoqiu Wang, Lingfeng Mao, Hua Yu, Xinfen Yu, Zhou Sun, Xin Qian, Shuchang Chen, Junfang Chen, Xuchu Wang                       |
|                                              | EPI_ISL_421232 | hCoV-19/Hangzhou/HZCDC0048L/2020 | Asia / China / Hangzhou           | 2020-01-21 | Hangzhou Center for Diseases Control and Prevention                                                                                     |
|                                              |                |                                  |                                   |            | Jun Li, Haoqiu Wang, Lingfeng Mao, Hua Yu, Xinfen Yu, Zhou Sun, Xin Qian, Shuchang Chen, Junfang Chen, Xuchu Wang                       |
|                                              | EPI_ISL_421233 | hCoV-19/Hangzhou/HZCDC0048/2020  | Asia / China / Hangzhou           | 2020-01-21 | Hangzhou Center for Diseases Control and Prevention                                                                                     |
|                                              |                |                                  |                                   |            | Jun Li, Haoqiu Wang, Lingfeng Mao, Hua Yu, Xinfen Yu, Zhou Sun, Xin Qian, Shuchang Chen, Junfang Chen, Xuchu Wang                       |
|                                              | EPI_ISL_421234 | hCoV-19/Hangzhou/HZCDC0025/2020  | Asia / China / Hangzhou           | 2020-01-21 | Hangzhou Center for Diseases Control and Prevention                                                                                     |
|                                              |                |                                  |                                   |            | Jun Li, Haoqiu Wang, Lingfeng Mao, Hua Yu, Xinfen Yu, Zhou Sun, Xin Qian, Shuchang Chen, Junfang Chen, Xuchu Wang                       |
|                                              | EPI_ISL_421235 | hCoV-19/Hangzhou/HZCDC0013/2020  | Asia / China / Hangzhou           | 2020-01-20 | Hangzhou Center for Diseases Control and Prevention                                                                                     |
|                                              |                |                                  |                                   |            | Jun Li, Haoqiu Wang, Lingfeng Mao, Hua Yu, Xinfen Yu, Zhou Sun, Xin Qian, Shuchang Chen, Junfang Chen, Xuchu Wang                       |
|                                              | EPI_ISL_421236 | hCoV-19/Hangzhou/HZCDC0012/2020  | Asia / China / Hangzhou           | 2020-01-20 | Hangzhou Center for Diseases Control and Prevention                                                                                     |
|                                              |                |                                  |                                   |            | Jun Li, Haoqiu Wang, Lingfeng Mao, Hua Yu, Xinfen Yu, Zhou Sun, Xin Qian, Shuchang Chen, Junfang Chen, Xuchu Wang                       |
|                                              | EPI_ISL_421237 | hCoV-19/Jiujiang/JX22/2020       | Asia / China / Jiangxi / Jiujiang | 2020-01-22 | Jiangxi Province Center for Disease Control and Prevention                                                                              |
|                                              |                |                                  |                                   |            | JianXiong Li, Ying Xiong, Tian Gong, Yong Shi, Jun Zhou, Fang Xiao, ShiWen Liu, XiaoQing Liu, Gang Xu, DaJin Xiao, Xin Ran, YanNi Zhang |
|                                              | EPI_ISL_421238 | hCoV-19/Nanchang/JX174/2020      | Asia / China / Jiangxi / Nanchang | 2020-01-29 | Jiangxi Province Center for Disease Control and Prevention                                                                              |
|                                              |                |                                  |                                   |            | JianXiong Li, Ying Xiong, Tian Gong, Yong Shi, Jun Zhou, Fang Xiao, ShiWen Liu, XiaoQing Liu, Gang Xu, DaJin Xiao, Xin Ran, YanNi Zhang |
|                                              | EPI_ISL_421239 | hCoV-19/Shangrao/JX105/2020      | Asia / China / Jiangxi / Shangrao | 2020-01-26 | Jiangxi Province Center for Disease Control and Prevention                                                                              |
|                                              |                |                                  |                                   |            | JianXiong Li, Ying Xiong, Tian Gong, Yong Shi, Jun Zhou, Fang Xiao, ShiWen Liu, XiaoQing Liu, Gang Xu, DaJin Xiao, Xin Ran, YanNi Zhang |
|                                              | EPI_ISL_421240 | hCoV-19/Shangrao/JX1948/2020     | Asia / China / Jiangxi / Shangrao | 2020-02-05 | Jiangxi Province Center for Disease Control and Prevention                                                                              |
|                                              |                |                                  |                                   |            | JianXiong Li, Ying Xiong, Tian Gong, Yong Shi, Jun Zhou, Fang Xiao, ShiWen Liu, XiaoQing Liu, Gang Xu, DaJin Xiao, Xin Ran, YanNi Zhang |
|                                              | EPI_ISL_421241 | hCoV-19/Nanchang/JX177/2020      | Asia / China / Jiangxi / Nanchang | 2020-01-30 | Jiangxi Province Center for Disease Control and Prevention                                                                              |
|                                              |                |                                  |                                   |            | JianXiong Li, Ying Xiong, Tian Gong, Yong Shi, Jun Zhou, Fang Xiao, ShiWen Liu, XiaoQing Liu, Gang Xu, DaJin Xiao, Xin Ran, YanNi Zhang |
|                                              | EPI_ISL_421242 | hCoV-19/Ganzhou/JX81/2020        | Asia / China / Jiangxi / Ganzhou  | 2020-01-25 | Jiangxi Province Center for Disease Control and Prevention                                                                              |
|                                              |                |                                  |                                   |            | JianXiong Li, Ying Xiong, Tian Gong, Yong Shi, Jun Zhou, Fang Xiao, ShiWen Liu, XiaoQing Liu, Gang Xu, DaJin Xiao, Xin Ran, YanNi Zhang |
|                                              | EPI_ISL_421243 | hCoV-19/Nanchang/JX14/2020       | Asia / China / Jiangxi / Nanchang | 2020-01-21 | Jiangxi Province Center for Disease Control and Prevention                                                                              |
|                                              |                |                                  |                                   |            | JianXiong Li, Ying Xiong, Tian Gong, Yong Shi, Jun Zhou, Fang Xiao, ShiWen Liu, XiaoQing Liu, Gang Xu, DaJin Xiao, Xin Ran, YanNi Zhang |
|                                              | EPI_ISL_421244 | hCoV-19/Shangrao/JX29/2020       | Asia / China / Jiangxi / Shangrao | 2020-01-22 | Jiangxi Province Center for Disease Control and Prevention                                                                              |
|                                              |                |                                  |                                   |            | JianXiong Li, Ying Xiong, Tian Gong, Yong Shi, Jun Zhou, Fang Xiao, ShiWen Liu, XiaoQing Liu, Gang Xu, DaJin Xiao, Xin Ran, YanNi Zhang |





|                                                                                                                                                                                                                                                                                                        |                                         |                                               |            |                                                                                                   |
|--------------------------------------------------------------------------------------------------------------------------------------------------------------------------------------------------------------------------------------------------------------------------------------------------------|-----------------------------------------|-----------------------------------------------|------------|---------------------------------------------------------------------------------------------------|
| EPI_ISL_421272                                                                                                                                                                                                                                                                                         | hCoV-19/USA/WY-WYPH001/2020             | North America / USA / Wyoming                 | 2020-03-10 | Wyoming Public Health Laboratory                                                                  |
| Center for Global Health, University of New Mexico Health Sciences Center Daryl Domman, Kurt Schwalm, Rob Christensen, Wanda Manley, Cari Sloma, Noah Hull, Darrell Dinwiddie                                                                                                                          |                                         |                                               |            |                                                                                                   |
| EPI_ISL_421275                                                                                                                                                                                                                                                                                         | hCoV-19/Russia/Moscow_PMVL-1/2020       | Europe / Russia / Moscow                      | 2020-03-18 | Russian State Collection of Viruses                                                               |
| Pathogenic Microorganisms Variability Laboratory Alexey Shchetinin, Maria Nikiforova, Nadezhda Kuznetsova, Ekaterina Aksenova, Marina Kunda, Natalia Ryzhova, Olga Voronina, Inna Dolzhikova, Daria Grousova, Andrey Botikov, Denis Logunov, Alexander Gintsburg, Vladimir Gushchin                    |                                         |                                               |            |                                                                                                   |
| EPI_ISL_421279                                                                                                                                                                                                                                                                                         | hCoV-19/USA/IN-Lilly-IPB0170-4bc20/2020 | North America / USA / Indiana / Indianapolis  | 2020-03-19 | Clinical Diagnostics Laboratory, Diagnostic & Experimental Pathology, Lilly Research Laboratories |
| Clinical Diagnostics Laboratory, Diagnostic & Experimental Pathology, Lilly Research Laboratories Tim Holzer, Mayuri Vaidya, Angie Fulford, Sam McNeely, Rachael Redmond, Phil Ebert, John Calley, Leslie O'Neill Reising, Pat Finnegan, Erin Wray, John McElwee, Jeff Fill, Joe Oakley, Andrew Schade |                                         |                                               |            |                                                                                                   |
| EPI_ISL_421281                                                                                                                                                                                                                                                                                         | hCoV-19/USA/IN-Lilly-IPB0170-4bc21/2020 | North America / USA / Indiana / Indianapolis  | 2020-03-19 | Clinical Diagnostics Laboratory, Diagnostic & Experimental Pathology, Lilly Research Laboratories |
| Clinical Diagnostics Laboratory, Diagnostic & Experimental Pathology, Lilly Research Laboratories Tim Holzer, Mayuri Vaidya, Angie Fulford, Sam McNeely, Rachael Redmond, Phil Ebert, John Calley, Leslie O'Neill Reising, Pat Finnegan, Erin Wray, John McElwee, Jeff Fill, Joe Oakley, Andrew Schade |                                         |                                               |            |                                                                                                   |
| EPI_ISL_421283                                                                                                                                                                                                                                                                                         | hCoV-19/USA/WI-UW-25/2020               | North America / USA / Wisconsin / Madison     | 2020-03-23 | University of Wisconsin-Madison AIDS Vaccine Research Laboratories                                |
| University of Wisconsin-Madison AIDS Vaccine Research Laboratories Gage Moreno, Katarina Braun, et al. AIDS Vaccine Research Laboratories                                                                                                                                                              |                                         |                                               |            |                                                                                                   |
| EPI_ISL_421284                                                                                                                                                                                                                                                                                         | hCoV-19/USA/WI-UW-26/2020               | North America / USA / Wisconsin / Verona      | 2020-03-24 | University of Wisconsin-Madison AIDS Vaccine Research Laboratories                                |
| University of Wisconsin-Madison AIDS Vaccine Research Laboratories Gage Moreno, Katarina Braun, et al. AIDS Vaccine Research Laboratories                                                                                                                                                              |                                         |                                               |            |                                                                                                   |
| EPI_ISL_421285                                                                                                                                                                                                                                                                                         | hCoV-19/USA/WI-UW-27/2020               | North America / USA / Wisconsin / Mount Horeb | 2020-03-25 | University of Wisconsin-Madison AIDS Vaccine Research Laboratories                                |
| University of Wisconsin-Madison AIDS Vaccine Research Laboratories Gage Moreno, Katarina Braun, et al. AIDS Vaccine Research Laboratories                                                                                                                                                              |                                         |                                               |            |                                                                                                   |
| EPI_ISL_421286                                                                                                                                                                                                                                                                                         | hCoV-19/USA/WI-UW-28/2020               | North America / USA / Wisconsin / Madison     | 2020-03-25 | University of Wisconsin-Madison AIDS Vaccine Research Laboratories                                |
| University of Wisconsin-Madison AIDS Vaccine Research Laboratories Gage Moreno, Katarina Braun, et al. AIDS Vaccine Research Laboratories                                                                                                                                                              |                                         |                                               |            |                                                                                                   |
| EPI_ISL_421287                                                                                                                                                                                                                                                                                         | hCoV-19/USA/WI-UW-29/2020               | North America / USA / Wisconsin / Fitchburg   | 2020-03-24 | University of Wisconsin-Madison AIDS Vaccine Research Laboratories                                |
| University of Wisconsin-Madison AIDS Vaccine Research Laboratories Gage Moreno, Katarina Braun, et al. AIDS Vaccine Research Laboratories                                                                                                                                                              |                                         |                                               |            |                                                                                                   |
| EPI_ISL_421288                                                                                                                                                                                                                                                                                         | hCoV-19/USA/WI-UW-30/2020               | North America / USA / Wisconsin / Columbus    | 2020-03-26 | University of Wisconsin-Madison AIDS Vaccine Research Laboratories                                |
| University of Wisconsin-Madison AIDS Vaccine Research Laboratories Gage Moreno, Katarina Braun, et al. AIDS Vaccine Research Laboratories                                                                                                                                                              |                                         |                                               |            |                                                                                                   |
| EPI_ISL_421289                                                                                                                                                                                                                                                                                         | hCoV-19/USA/WI-UW-31/2020               | North America / USA / Wisconsin / Madison     | 2020-03-25 | University of Wisconsin-Madison AIDS Vaccine Research Laboratories                                |
| University of Wisconsin-Madison AIDS Vaccine Research Laboratories Gage Moreno, Katarina Braun, et al. AIDS Vaccine Research Laboratories                                                                                                                                                              |                                         |                                               |            |                                                                                                   |
| EPI_ISL_421290                                                                                                                                                                                                                                                                                         | hCoV-19/USA/WI-UW-32/2020               | North America / USA / Wisconsin / Madison     | 2020-03-24 | University of Wisconsin-Madison AIDS Vaccine Research Laboratories                                |
| University of Wisconsin-Madison AIDS Vaccine Research Laboratories Gage Moreno, Katarina Braun, et al. AIDS Vaccine Research Laboratories                                                                                                                                                              |                                         |                                               |            |                                                                                                   |
| EPI_ISL_421291                                                                                                                                                                                                                                                                                         | hCoV-19/USA/WI-UW-33/2020               | North America / USA / Wisconsin / Madison     | 2020-03-23 | University of Wisconsin-Madison AIDS Vaccine Research Laboratories                                |
| University of Wisconsin-Madison AIDS Vaccine Research Laboratories Gage Moreno, Katarina Braun, et al. AIDS Vaccine Research Laboratories                                                                                                                                                              |                                         |                                               |            |                                                                                                   |
| EPI_ISL_421292                                                                                                                                                                                                                                                                                         | hCoV-19/USA/WI-UW-34/2020               | North America / USA / Wisconsin / Madison     | 2020-03-26 | University of Wisconsin-Madison AIDS Vaccine Research Laboratories                                |
| University of Wisconsin-Madison AIDS Vaccine Research Laboratories Gage Moreno, Katarina Braun, et al. AIDS Vaccine Research Laboratories                                                                                                                                                              |                                         |                                               |            |                                                                                                   |
| EPI_ISL_421293                                                                                                                                                                                                                                                                                         | hCoV-19/USA/WI-UW-35/2020               | North America / USA / Wisconsin / Stoughton   | 2020-03-24 | University of Wisconsin-Madison AIDS Vaccine Research Laboratories                                |
| University of Wisconsin-Madison AIDS Vaccine Research Laboratories Gage Moreno, Katarina Braun, et al. AIDS Vaccine Research Laboratories                                                                                                                                                              |                                         |                                               |            |                                                                                                   |
| EPI_ISL_421294                                                                                                                                                                                                                                                                                         | hCoV-19/USA/WI-UW-36/2020               | North America / USA / Wisconsin / Janesville  | 2020-03-25 | University of Wisconsin-Madison AIDS Vaccine Research Laboratories                                |
| University of Wisconsin-Madison AIDS Vaccine Research Laboratories Gage Moreno, Katarina Braun, et al. AIDS Vaccine Research Laboratories                                                                                                                                                              |                                         |                                               |            |                                                                                                   |
| EPI_ISL_421295                                                                                                                                                                                                                                                                                         | hCoV-19/USA/WI-UW-37/2020               | North America / USA / Wisconsin / Verona      | 2020-03-22 | University of Wisconsin-Madison AIDS Vaccine Research Laboratories                                |
| University of Wisconsin-Madison AIDS Vaccine Research Laboratories Gage Moreno, Katarina Braun, et al. AIDS Vaccine Research Laboratories                                                                                                                                                              |                                         |                                               |            |                                                                                                   |
| EPI_ISL_421296                                                                                                                                                                                                                                                                                         | hCoV-19/USA/WI-UW-38/2020               | North America / USA / Wisconsin / Stoughton   | 2020-03-25 | University of Wisconsin-Madison AIDS Vaccine Research Laboratories                                |
| University of Wisconsin-Madison AIDS Vaccine Research Laboratories Gage Moreno, Katarina Braun, et al. AIDS Vaccine Research Laboratories                                                                                                                                                              |                                         |                                               |            |                                                                                                   |
| EPI_ISL_421297                                                                                                                                                                                                                                                                                         | hCoV-19/USA/WI-UW-39/2020               | North America / USA / Wisconsin / Marshall    | 2020-03-22 | University of Wisconsin-Madison AIDS Vaccine Research Laboratories                                |
| University of Wisconsin-Madison AIDS Vaccine Research Laboratories Gage Moreno, Katarina Braun, et al. AIDS Vaccine Research Laboratories                                                                                                                                                              |                                         |                                               |            |                                                                                                   |
| EPI_ISL_421298                                                                                                                                                                                                                                                                                         | hCoV-19/USA/WI-UW-40/2020               | North America / USA / Wisconsin / Waunakee    | 2020-03-24 | University of Wisconsin-Madison AIDS Vaccine Research Laboratories                                |
| University of Wisconsin-Madison AIDS Vaccine Research Laboratories Gage Moreno, Katarina Braun, et al. AIDS Vaccine Research Laboratories                                                                                                                                                              |                                         |                                               |            |                                                                                                   |
| EPI_ISL_421299                                                                                                                                                                                                                                                                                         | hCoV-19/USA/WI-UW-41/2020               | North America / USA / Wisconsin / DeForest    | 2020-03-25 | University of Wisconsin-Madison AIDS Vaccine Research Laboratories                                |
| University of Wisconsin-Madison AIDS Vaccine Research Laboratories Gage Moreno, Katarina Braun, et al. AIDS Vaccine Research Laboratories                                                                                                                                                              |                                         |                                               |            |                                                                                                   |
| EPI_ISL_421303                                                                                                                                                                                                                                                                                         | hCoV-19/USA/WI-UW-45/2020               | North America / USA / Wisconsin / Oregon      | 2020-03-22 | University of Wisconsin-Madison AIDS Vaccine Research Laboratories                                |
| University of Wisconsin-Madison AIDS Vaccine Research Laboratories                                                                                                                                                                                                                                     |                                         |                                               |            |                                                                                                   |

|                                                                    |                                     |                                                                                                                                                                                                                                                                                                                                                                                                                                      |            |
|--------------------------------------------------------------------|-------------------------------------|--------------------------------------------------------------------------------------------------------------------------------------------------------------------------------------------------------------------------------------------------------------------------------------------------------------------------------------------------------------------------------------------------------------------------------------|------------|
| Vaccine Research Laboratories                                      | Gage Moreno, Katarina Braun, et al. | AIDS Vaccine Research Laboratories                                                                                                                                                                                                                                                                                                                                                                                                   |            |
| EPI_ISL_421324                                                     | hCoV-19/USA/WI-UW-66/2020           | North America / USA / Wisconsin / Madison                                                                                                                                                                                                                                                                                                                                                                                            | 2020-03-24 |
| University of Wisconsin-Madison AIDS Vaccine Research Laboratories | Gage Moreno, Katarina Braun, et al. | AIDS Vaccine Research Laboratories                                                                                                                                                                                                                                                                                                                                                                                                   |            |
| EPI_ISL_421325                                                     | hCoV-19/USA/WI-UW-67/2020           | North America / USA / Wisconsin / Sun Prairie                                                                                                                                                                                                                                                                                                                                                                                        | 2020-03-25 |
| University of Wisconsin-Madison AIDS Vaccine Research Laboratories | Gage Moreno, Katarina Braun, et al. | AIDS Vaccine Research Laboratories                                                                                                                                                                                                                                                                                                                                                                                                   |            |
| EPI_ISL_421326                                                     | hCoV-19/USA/WI-UW-68/2020           | North America / USA / Wisconsin / Madison                                                                                                                                                                                                                                                                                                                                                                                            | 2020-03-24 |
| University of Wisconsin-Madison AIDS Vaccine Research Laboratories | Gage Moreno, Katarina Braun, et al. | AIDS Vaccine Research Laboratories                                                                                                                                                                                                                                                                                                                                                                                                   |            |
| EPI_ISL_421327                                                     | hCoV-19/USA/WI-UW-69/2020           | North America / USA / Wisconsin / Stoughton                                                                                                                                                                                                                                                                                                                                                                                          | 2020-03-19 |
| University of Wisconsin-Madison AIDS Vaccine Research Laboratories | Gage Moreno, Katarina Braun, et al. | AIDS Vaccine Research Laboratories                                                                                                                                                                                                                                                                                                                                                                                                   |            |
| EPI_ISL_421328                                                     | hCoV-19/USA/WI-UW-70/2020           | North America / USA / Wisconsin / Sun Prairie                                                                                                                                                                                                                                                                                                                                                                                        | 2020-03-19 |
| University of Wisconsin-Madison AIDS Vaccine Research Laboratories | Gage Moreno, Katarina Braun, et al. | AIDS Vaccine Research Laboratories                                                                                                                                                                                                                                                                                                                                                                                                   |            |
| EPI_ISL_421329                                                     | hCoV-19/USA/WI-UW-71/2020           | North America / USA / Wisconsin / Madison                                                                                                                                                                                                                                                                                                                                                                                            | 2020-03-24 |
| University of Wisconsin-Madison AIDS Vaccine Research Laboratories | Gage Moreno, Katarina Braun, et al. | AIDS Vaccine Research Laboratories                                                                                                                                                                                                                                                                                                                                                                                                   |            |
| EPI_ISL_421330                                                     | hCoV-19/USA/WI-UW-72/2020           | North America / USA / Wisconsin / Madison                                                                                                                                                                                                                                                                                                                                                                                            | 2020-03-25 |
| University of Wisconsin-Madison AIDS Vaccine Research Laboratories | Gage Moreno, Katarina Braun, et al. | AIDS Vaccine Research Laboratories                                                                                                                                                                                                                                                                                                                                                                                                   |            |
| EPI_ISL_421331                                                     | hCoV-19/USA/WI-UW-73/2020           | North America / USA / Wisconsin / Madison                                                                                                                                                                                                                                                                                                                                                                                            | 2020-03-24 |
| University of Wisconsin-Madison AIDS Vaccine Research Laboratories | Gage Moreno, Katarina Braun, et al. | AIDS Vaccine Research Laboratories                                                                                                                                                                                                                                                                                                                                                                                                   |            |
| EPI_ISL_421332                                                     | hCoV-19/USA/WI-UW-74/2020           | North America / USA / Wisconsin / Fitchburg                                                                                                                                                                                                                                                                                                                                                                                          | 2020-03-20 |
| University of Wisconsin-Madison AIDS Vaccine Research Laboratories | Gage Moreno, Katarina Braun, et al. | AIDS Vaccine Research Laboratories                                                                                                                                                                                                                                                                                                                                                                                                   |            |
| EPI_ISL_421333                                                     | hCoV-19/USA/WI-UW-75/2020           | North America / USA / Wisconsin / Madison                                                                                                                                                                                                                                                                                                                                                                                            | 2020-03-26 |
| University of Wisconsin-Madison AIDS Vaccine Research Laboratories | Gage Moreno, Katarina Braun, et al. | AIDS Vaccine Research Laboratories                                                                                                                                                                                                                                                                                                                                                                                                   |            |
| EPI_ISL_421334                                                     | hCoV-19/USA/WI-UW-76/2020           | North America / USA / Wisconsin / Marshall                                                                                                                                                                                                                                                                                                                                                                                           | 2020-03-22 |
| University of Wisconsin-Madison AIDS Vaccine Research Laboratories | Gage Moreno, Katarina Braun, et al. | AIDS Vaccine Research Laboratories                                                                                                                                                                                                                                                                                                                                                                                                   |            |
| EPI_ISL_421335                                                     | hCoV-19/USA/WI-UW-77/2020           | North America / USA / Wisconsin / Stoughton                                                                                                                                                                                                                                                                                                                                                                                          | 2020-03-19 |
| University of Wisconsin-Madison AIDS Vaccine Research Laboratories | Gage Moreno, Katarina Braun, et al. | AIDS Vaccine Research Laboratories                                                                                                                                                                                                                                                                                                                                                                                                   |            |
| EPI_ISL_421336                                                     | hCoV-19/USA/WI-UW-78/2020           | North America / USA / Wisconsin / Madison                                                                                                                                                                                                                                                                                                                                                                                            | 2020-03-24 |
| University of Wisconsin-Madison AIDS Vaccine Research Laboratories | Gage Moreno, Katarina Braun, et al. | AIDS Vaccine Research Laboratories                                                                                                                                                                                                                                                                                                                                                                                                   |            |
| EPI_ISL_421338                                                     | hCoV-19/USA/WI-UW-79/2020           | North America / USA / Wisconsin / Madison                                                                                                                                                                                                                                                                                                                                                                                            | 2020-03-23 |
| University of Wisconsin-Madison AIDS Vaccine Research Laboratories | Gage Moreno, Katarina Braun, et al. | AIDS Vaccine Research Laboratories                                                                                                                                                                                                                                                                                                                                                                                                   |            |
| EPI_ISL_421339                                                     | hCoV-19/USA/WI-UW-80/2020           | North America / USA / Wisconsin / Mount Horeb                                                                                                                                                                                                                                                                                                                                                                                        | 2020-03-24 |
| University of Wisconsin-Madison AIDS Vaccine Research Laboratories | Gage Moreno, Katarina Braun, et al. | AIDS Vaccine Research Laboratories                                                                                                                                                                                                                                                                                                                                                                                                   |            |
| EPI_ISL_421340                                                     | hCoV-19/USA/WI-UW-81/2020           | North America / USA / Wisconsin / Verona                                                                                                                                                                                                                                                                                                                                                                                             | 2020-03-25 |
| University of Wisconsin-Madison AIDS Vaccine Research Laboratories | Gage Moreno, Katarina Braun, et al. | AIDS Vaccine Research Laboratories                                                                                                                                                                                                                                                                                                                                                                                                   |            |
| EPI_ISL_421341                                                     | hCoV-19/USA/WI-UW-82/2020           | North America / USA / Wisconsin / Monona                                                                                                                                                                                                                                                                                                                                                                                             | 2020-03-25 |
| University of Wisconsin-Madison AIDS Vaccine Research Laboratories | Gage Moreno, Katarina Braun, et al. | AIDS Vaccine Research Laboratories                                                                                                                                                                                                                                                                                                                                                                                                   |            |
| EPI_ISL_421342                                                     | hCoV-19/USA/WI-UW-83/2020           | North America / USA / Wisconsin / Columbus                                                                                                                                                                                                                                                                                                                                                                                           | 2020-03-25 |
| University of Wisconsin-Madison AIDS Vaccine Research Laboratories | Gage Moreno, Katarina Braun, et al. | AIDS Vaccine Research Laboratories                                                                                                                                                                                                                                                                                                                                                                                                   |            |
| EPI_ISL_421343                                                     | hCoV-19/USA/WI-UW-84/2020           | North America / USA / Wisconsin / Middleton                                                                                                                                                                                                                                                                                                                                                                                          | 2020-03-24 |
| University of Wisconsin-Madison AIDS Vaccine Research Laboratories | Gage Moreno, Katarina Braun, et al. | AIDS Vaccine Research Laboratories                                                                                                                                                                                                                                                                                                                                                                                                   |            |
| EPI_ISL_422556                                                     | hCoV-19/USA/NY-PV09301/2020         | North America / USA / New York / Brooklyn                                                                                                                                                                                                                                                                                                                                                                                            | 2020-03-21 |
| MSHS Clinical Microbiology Laboratories                            | MSHS Pathogen Surveillance Program  | Ana S. Gonzalez-Reiche, Mitchell Sullivan, Ajay Obla, Gopi Patel, Emilia Sordillo, Melissa Gitman, Alberto Paniz-mondolfi, Matthew Hernandez, Shelcie Fabre, Jose Polanco, Zenab Khan, Brey Albuquerque, Jayeeta Dutta, Juan Soto, Shwetha Sridhar Hara, Ying-Chih Wang, Melissa Smith, Robert Sebra, Lisa Miorin, Wen-chun Liu, Randy Albrecht, Judith Aberg, Florian Krammer, Adolfo Garcia-Sarstre, Viviana Simon, Harm van Bakel |            |
| EPI_ISL_422557                                                     | hCoV-19/USA/NY-PV09303/2020         | North America / USA / New York / Manhattan                                                                                                                                                                                                                                                                                                                                                                                           | 2020-03-21 |
| MSHS Clinical Microbiology Laboratories                            | MSHS Pathogen Surveillance Program  | Ana S. Gonzalez-Reiche, Mitchell Sullivan, Ajay Obla, Gopi Patel, Emilia Sordillo, Melissa Gitman, Alberto Paniz-mondolfi, Matthew Hernandez, Shelcie Fabre, Jose Polanco, Zenab Khan, Brey Albuquerque, Jayeeta Dutta, Juan Soto, Shwetha Sridhar Hara, Ying-Chih Wang, Melissa Smith, Robert Sebra, Lisa Miorin, Wen-chun Liu, Randy Albrecht, Judith Aberg, Florian Krammer, Adolfo Garcia-Sarstre, Viviana Simon, Harm van Bakel |            |

EPI\_ISL\_422558 hCoV-19/USA/NY-PV09304/2020 North America / USA / New York / Brooklyn 2020-03-21  
MSHS Clinical Microbiology Laboratories MSHS Pathogen Surveillance Program Ana S. Gonzalez-Reiche, Mitchell Sullivan, Ajay Obla, Gopi Patel, Emilia Sordillo, Melissa Gitman, Alberto Paniz-mondolfi, Matthew Hernandez, Shelcie Fabre, Jose Polanco, Zenab Khan, Bremy Albuquerque, Jayeeta Dutta, Juan Soto, Shwetha Sridhar Hara, Ying-Chih Wang, Melissa Smith, Robert Sebra, Lisa Miorin, Wen-chun Liu, Randy Albrecht, Judith Aberg, Florian Krammer, Adolfo Garcia-Sarstre, Viviana Simon, Harm van Bakel

EPI\_ISL\_422559 hCoV-19/USA/NY-PV09305/2020 North America / USA / New York / Brooklyn 2020-03-22  
MSHS Clinical Microbiology Laboratories MSHS Pathogen Surveillance Program Ana S. Gonzalez-Reiche, Mitchell Sullivan, Ajay Obla, Gopi Patel, Emilia Sordillo, Melissa Gitman, Alberto Paniz-mondolfi, Matthew Hernandez, Shelcie Fabre, Jose Polanco, Zenab Khan, Bremy Albuquerque, Jayeeta Dutta, Juan Soto, Shwetha Sridhar Hara, Ying-Chih Wang, Melissa Smith, Robert Sebra, Lisa Miorin, Wen-chun Liu, Randy Albrecht, Judith Aberg, Florian Krammer, Adolfo Garcia-Sarstre, Viviana Simon, Harm van Bakel

EPI\_ISL\_422560 hCoV-19/USA/NY-PV09307/2020 North America / USA / New York / 2020-03-22 MSHS  
Clinical Microbiology Laboratories MSHS Pathogen Surveillance Program Ana S. Gonzalez-Reiche, Mitchell Sullivan, Ajay Obla, Gopi Patel, Emilia Sordillo, Melissa Gitman, Alberto Paniz-mondolfi, Matthew Hernandez, Shelcie Fabre, Jose Polanco, Zenab Khan, Bremy Albuquerque, Jayeeta Dutta, Juan Soto, Shwetha Sridhar Hara, Ying-Chih Wang, Melissa Smith, Robert Sebra, Lisa Miorin, Wen-chun Liu, Randy Albrecht, Judith Aberg, Florian Krammer, Adolfo Garcia-Sarstre, Viviana Simon, Harm van Bakel

EPI\_ISL\_422561 hCoV-19/USA/NY-PV09308/2020 North America / USA / New York / Manhattan 2020-03-22  
MSHS Clinical Microbiology Laboratories MSHS Pathogen Surveillance Program Ana S. Gonzalez-Reiche, Mitchell Sullivan, Ajay Obla, Gopi Patel, Emilia Sordillo, Melissa Gitman, Alberto Paniz-mondolfi, Matthew Hernandez, Shelcie Fabre, Jose Polanco, Zenab Khan, Bremy Albuquerque, Jayeeta Dutta, Juan Soto, Shwetha Sridhar Hara, Ying-Chih Wang, Melissa Smith, Robert Sebra, Lisa Miorin, Wen-chun Liu, Randy Albrecht, Judith Aberg, Florian Krammer, Adolfo Garcia-Sarstre, Viviana Simon, Harm van Bakel

EPI\_ISL\_422562 hCoV-19/USA/NY-PV09309/2020 North America / USA / New York / Bronx 2020-03-22 MSHS  
Clinical Microbiology Laboratories MSHS Pathogen Surveillance Program Ana S. Gonzalez-Reiche, Mitchell Sullivan, Ajay Obla, Gopi Patel, Emilia Sordillo, Melissa Gitman, Alberto Paniz-mondolfi, Matthew Hernandez, Shelcie Fabre, Jose Polanco, Zenab Khan, Bremy Albuquerque, Jayeeta Dutta, Juan Soto, Shwetha Sridhar Hara, Ying-Chih Wang, Melissa Smith, Robert Sebra, Lisa Miorin, Wen-chun Liu, Randy Albrecht, Judith Aberg, Florian Krammer, Adolfo Garcia-Sarstre, Viviana Simon, Harm van Bakel

EPI\_ISL\_422566 hCoV-19/Netherlands/Friesland\_10/2020 Europe / Netherlands / Friesland 2020-03-30  
Dutch COVID-19 response team Erasmus Medical Center Bas Oude Munnink, David Nieuwenhuijse, Reina Sikkema, Claudia Schapendonk, Irina Chestakova, Anne van der Linden, Theo Bestebroer, Stefan van Nieuwkoop, Mark Pronk, Pascal Lexmond, Corien Swaan, Manon Haverkate, Madelief Mollers, Mart Stein, Sandra Kengne Kamga Mobou, Jeroen van Kampen, Jolanda Voermans, Aura Timen, Corine GeurtsvanKessel, Annemiek van der Eijk, Richard Molenkamp, Marion Koopmans, on behalf of the Dutch national COVID-19 response team.

EPI\_ISL\_422568 hCoV-19/Netherlands/Friesland\_3/2020 Europe / Netherlands / Friesland 2020-03-28  
Dutch COVID-19 response team Erasmus Medical Center Bas Oude Munnink, David Nieuwenhuijse, Reina Sikkema, Claudia Schapendonk, Irina Chestakova, Anne van der Linden, Theo Bestebroer, Stefan van Nieuwkoop, Mark Pronk, Pascal Lexmond, Corien Swaan, Manon Haverkate, Madelief Mollers, Mart Stein, Sandra Kengne Kamga Mobou, Jeroen van Kampen, Jolanda Voermans, Aura Timen, Corine GeurtsvanKessel, Annemiek van der Eijk, Richard Molenkamp, Marion Koopmans, on behalf of the Dutch national COVID-19 response team.

EPI\_ISL\_422569 hCoV-19/Netherlands/Friesland\_4/2020 Europe / Netherlands / Friesland 2020-03-27  
Dutch COVID-19 response team Erasmus Medical Center Bas Oude Munnink, David Nieuwenhuijse, Reina Sikkema, Claudia Schapendonk, Irina Chestakova, Anne van der Linden, Theo Bestebroer, Stefan van Nieuwkoop, Mark Pronk, Pascal Lexmond, Corien Swaan, Manon Haverkate, Madelief Mollers, Mart Stein, Sandra Kengne Kamga Mobou, Jeroen van Kampen, Jolanda Voermans, Aura Timen, Corine GeurtsvanKessel, Annemiek van der Eijk, Richard Molenkamp, Marion Koopmans, on behalf of the Dutch national COVID-19 response team.

EPI\_ISL\_422571 hCoV-19/Netherlands/Friesland\_6/2020 Europe / Netherlands / Friesland 2020-03-28  
Dutch COVID-19 response team Erasmus Medical Center Bas Oude Munnink, David Nieuwenhuijse, Reina Sikkema, Claudia Schapendonk, Irina Chestakova, Anne van der Linden, Theo Bestebroer, Stefan van Nieuwkoop, Mark Pronk, Pascal Lexmond, Corien Swaan, Manon Haverkate, Madelief Mollers, Mart Stein, Sandra Kengne Kamga Mobou, Jeroen van Kampen, Jolanda Voermans, Aura Timen, Corine GeurtsvanKessel, Annemiek van der Eijk, Richard Molenkamp, Marion Koopmans, on behalf of the Dutch national COVID-19 response team.

EPI\_ISL\_422572 hCoV-19/Netherlands/Friesland\_7/2020 Europe / Netherlands / Friesland 2020-03-28  
Dutch COVID-19 response team Erasmus Medical Center Bas Oude Munnink, David Nieuwenhuijse, Reina Sikkema, Claudia Schapendonk, Irina Chestakova, Anne van der Linden, Theo Bestebroer, Stefan van Nieuwkoop, Mark Pronk, Pascal Lexmond, Corien Swaan, Manon Haverkate, Madelief Mollers, Mart Stein, Sandra Kengne Kamga Mobou, Jeroen van Kampen, Jolanda Voermans, Aura Timen, Corine GeurtsvanKessel, Annemiek van der Eijk, Richard Molenkamp, Marion Koopmans, on behalf of the Dutch national COVID-19 response team.

EPI\_ISL\_422576 hCoV-19/Netherlands/NA\_265/2020 Europe / Netherlands 2020-03-30 Dutch COVID-19 response  
team Erasmus Medical Center Bas Oude Munnink, David Nieuwenhuijse, Reina Sikkema, Claudia Schapendonk, Irina Chestakova, Anne van der Linden, Theo Bestebroer, Stefan van Nieuwkoop, Mark Pronk, Pascal Lexmond, Corien Swaan, Manon Haverkate, Madelief Mollers, Mart Stein, Sandra Kengne Kamga Mobou, Jeroen van Kampen, Jolanda Voermans, Aura Timen, Corine GeurtsvanKessel, Annemiek van der Eijk, Richard Molenkamp, Marion Koopmans, on behalf of the Dutch national COVID-19 response team.

EPI\_ISL\_422577 hCoV-19/Netherlands/NA\_266/2020 Europe / Netherlands 2020-03-30 Dutch COVID-19 response  
team Erasmus Medical Center Bas Oude Munnink, David Nieuwenhuijse, Reina Sikkema, Claudia Schapendonk, Irina Chestakova, Anne van der Linden, Theo Bestebroer, Stefan van Nieuwkoop, Mark Pronk, Pascal Lexmond, Corien Swaan, Manon Haverkate, Madelief Mollers, Mart Stein, Sandra Kengne Kamga Mobou, Jeroen van Kampen,





EPI\_ISL\_422659 hCoV-19/Netherlands/NA\_111/2020 Europe / Netherlands 2020-03-15 Dutch COVID-19 response team Erasmus Medical Center Bas Oude Munnink, David Nieuwenhuijse, Reina Sikkema, Claudia Schapendonk, Irina Chestakova, Anne van der Linden, Theo Bestebroer, Stefan van Nieuwkoop, Mark Pronk, Pascal Lexmond, Corien Swaan, Manon Haverkate, Madelief Mollers, Mart Stein, Sandra Kengne Kamga Mobou, Jeroen van Kampen, Jolanda Voermans, Aura Timen, Corine GeurtsvanKessel, Annemiek van der Eijk, Richard Molenkamp, Marion Koopmans, on behalf of the Dutch national COVID-19 response team.

EPI\_ISL\_422660 hCoV-19/Netherlands/NA\_112/2020 Europe / Netherlands 2020-03-10 Dutch COVID-19 response team Erasmus Medical Center Bas Oude Munnink, David Nieuwenhuijse, Reina Sikkema, Claudia Schapendonk, Irina Chestakova, Anne van der Linden, Theo Bestebroer, Stefan van Nieuwkoop, Mark Pronk, Pascal Lexmond, Corien Swaan, Manon Haverkate, Madelief Mollers, Mart Stein, Sandra Kengne Kamga Mobou, Jeroen van Kampen, Jolanda Voermans, Aura Timen, Corine GeurtsvanKessel, Annemiek van der Eijk, Richard Molenkamp, Marion Koopmans, on behalf of the Dutch national COVID-19 response team.

EPI\_ISL\_422661 hCoV-19/Netherlands/NA\_113/2020 Europe / Netherlands 2020-03-10 Dutch COVID-19 response team Erasmus Medical Center Bas Oude Munnink, David Nieuwenhuijse, Reina Sikkema, Claudia Schapendonk, Irina Chestakova, Anne van der Linden, Theo Bestebroer, Stefan van Nieuwkoop, Mark Pronk, Pascal Lexmond, Corien Swaan, Manon Haverkate, Madelief Mollers, Mart Stein, Sandra Kengne Kamga Mobou, Jeroen van Kampen, Jolanda Voermans, Aura Timen, Corine GeurtsvanKessel, Annemiek van der Eijk, Richard Molenkamp, Marion Koopmans, on behalf of the Dutch national COVID-19 response team.

EPI\_ISL\_422662 hCoV-19/Netherlands/NA\_114/2020 Europe / Netherlands 2020-03-10 Dutch COVID-19 response team Erasmus Medical Center Bas Oude Munnink, David Nieuwenhuijse, Reina Sikkema, Claudia Schapendonk, Irina Chestakova, Anne van der Linden, Theo Bestebroer, Stefan van Nieuwkoop, Mark Pronk, Pascal Lexmond, Corien Swaan, Manon Haverkate, Madelief Mollers, Mart Stein, Sandra Kengne Kamga Mobou, Jeroen van Kampen, Jolanda Voermans, Aura Timen, Corine GeurtsvanKessel, Annemiek van der Eijk, Richard Molenkamp, Marion Koopmans, on behalf of the Dutch national COVID-19 response team.

EPI\_ISL\_422664 hCoV-19/Netherlands/NA\_117/2020 Europe / Netherlands 2020-03-16 Dutch COVID-19 response team Erasmus Medical Center Bas Oude Munnink, David Nieuwenhuijse, Reina Sikkema, Claudia Schapendonk, Irina Chestakova, Anne van der Linden, Theo Bestebroer, Stefan van Nieuwkoop, Mark Pronk, Pascal Lexmond, Corien Swaan, Manon Haverkate, Madelief Mollers, Mart Stein, Sandra Kengne Kamga Mobou, Jeroen van Kampen, Jolanda Voermans, Aura Timen, Corine GeurtsvanKessel, Annemiek van der Eijk, Richard Molenkamp, Marion Koopmans, on behalf of the Dutch national COVID-19 response team.

EPI\_ISL\_422665 hCoV-19/Netherlands/NA\_118/2020 Europe / Netherlands 2020-03-16 Dutch COVID-19 response team Erasmus Medical Center Bas Oude Munnink, David Nieuwenhuijse, Reina Sikkema, Claudia Schapendonk, Irina Chestakova, Anne van der Linden, Theo Bestebroer, Stefan van Nieuwkoop, Mark Pronk, Pascal Lexmond, Corien Swaan, Manon Haverkate, Madelief Mollers, Mart Stein, Sandra Kengne Kamga Mobou, Jeroen van Kampen, Jolanda Voermans, Aura Timen, Corine GeurtsvanKessel, Annemiek van der Eijk, Richard Molenkamp, Marion Koopmans, on behalf of the Dutch national COVID-19 response team.

EPI\_ISL\_422666 hCoV-19/Netherlands/NA\_119/2020 Europe / Netherlands 2020-03-16 Dutch COVID-19 response team Erasmus Medical Center Bas Oude Munnink, David Nieuwenhuijse, Reina Sikkema, Claudia Schapendonk, Irina Chestakova, Anne van der Linden, Theo Bestebroer, Stefan van Nieuwkoop, Mark Pronk, Pascal Lexmond, Corien Swaan, Manon Haverkate, Madelief Mollers, Mart Stein, Sandra Kengne Kamga Mobou, Jeroen van Kampen, Jolanda Voermans, Aura Timen, Corine GeurtsvanKessel, Annemiek van der Eijk, Richard Molenkamp, Marion Koopmans, on behalf of the Dutch national COVID-19 response team.

EPI\_ISL\_422667 hCoV-19/Netherlands/NA\_120/2020 Europe / Netherlands 2020-03-16 Dutch COVID-19 response team Erasmus Medical Center Bas Oude Munnink, David Nieuwenhuijse, Reina Sikkema, Claudia Schapendonk, Irina Chestakova, Anne van der Linden, Theo Bestebroer, Stefan van Nieuwkoop, Mark Pronk, Pascal Lexmond, Corien Swaan, Manon Haverkate, Madelief Mollers, Mart Stein, Sandra Kengne Kamga Mobou, Jeroen van Kampen, Jolanda Voermans, Aura Timen, Corine GeurtsvanKessel, Annemiek van der Eijk, Richard Molenkamp, Marion Koopmans, on behalf of the Dutch national COVID-19 response team.

EPI\_ISL\_422668 hCoV-19/Netherlands/NA\_121/2020 Europe / Netherlands 2020-03-17 Dutch COVID-19 response team Erasmus Medical Center Bas Oude Munnink, David Nieuwenhuijse, Reina Sikkema, Claudia Schapendonk, Irina Chestakova, Anne van der Linden, Theo Bestebroer, Stefan van Nieuwkoop, Mark Pronk, Pascal Lexmond, Corien Swaan, Manon Haverkate, Madelief Mollers, Mart Stein, Sandra Kengne Kamga Mobou, Jeroen van Kampen, Jolanda Voermans, Aura Timen, Corine GeurtsvanKessel, Annemiek van der Eijk,
