# Supplementary material for: Emergence of novel SARS-CoV-2 variants in the Netherlands
Source: PubMed Central journal article supplement (PMC7988010; doi:10.1038/s41598-021-85363-7), 2021-03-23
Supplement: 41598_2021_85363_MOESM4_ESM.pdf [file 41598_2021_85363_MOESM4_ESM.pdf]

Emergence of Novel SARS-CoV-2 Variants in the Netherlands - Supplementary File 3

Aysun Urhan1, Thomas Abeel1,2,\*

1 Delft Bioinformatics Lab, Delft University of Technology Van Mourik Broekmanweg 6, 2628 XE Delft, The Netherlands

2 Infectious Disease and Microbiome Program, Broad Institute of MIT and Harvard, 415 Main Street, Cambridge, MA 02142, USA

\* Corresponding author: t.abeel@tudelft.nl

MT020781  
MT049951  
MT066156  
MT077125  
MT123292  
MT123293  
MT126808  
MT192765  
MT226610  
MT233526  
MT246667  
MT256924  
MT263459  
MT276324  
MT276325  
MT276328  
MT276597  
MT291826  
MT291827  
MT291828  
MT291829  
MT291830  
MT292569  
MT292570  
MT292571  
MT292572  
MT292573  
MT292574  
MT292575  
MT293156  
MT293158  
MT293159  
MT293160  
MT293161  
MT293162  
MT293163  
MT293164  
MT293165  
MT293166  
MT293167  
MT293168  
MT293169  
MT293170  
MT293171  
MT293172  
MT293173  
MT293174  
MT293175  
MT293176  
MT293177  
MT293178  
MT293179  
MT293181  
MT293182  
MT293183  
MT293184  
MT293185  
MT293186  
MT293187  
MT293188  
MT293189

MT293190  
MT293191  
MT293192  
MT293194  
MT293195  
MT293196  
MT293197  
MT293198  
MT293199  
MT293200  
MT293201  
MT293202  
MT293204  
MT293205  
MT293206  
MT293207  
MT293208  
MT293209  
MT293210  
MT293211  
MT293212  
MT293213  
MT293215  
MT293216  
MT293218  
MT293219  
MT293220  
MT293222  
MT293224  
MT293225  
MT300186  
MT308702  
MT308703  
MT308704  
MT318827  
MT320538  
MT320891  
MT322396  
MT322397  
MT325561  
MT325562  
MT325563  
MT325564  
MT325565  
MT325566  
MT325567  
MT325568  
MT325569  
MT325570  
MT325571  
MT325572  
MT325573  
MT325574  
MT325575  
MT325576  
MT325577  
MT325578  
MT325579  
MT325580  
MT325581  
MT325582  
MT325583  
MT325584  
MT325585  
MT325586  
MT325587  
MT325588  
MT325589  
MT325590  
MT325591

MT325592  
MT325593  
MT325594  
MT325595  
MT325596  
MT325597  
MT325598  
MT325599  
MT325600  
MT325601  
MT325602  
MT325603  
MT325604  
MT325605  
MT325606  
MT325607  
MT325608  
MT325609  
MT325610  
MT325611  
MT325612  
MT325613  
MT325614  
MT325615  
MT325616  
MT325617  
MT325618  
MT325619  
MT325620  
MT325621  
MT325622  
MT325623  
MT325624  
MT325625  
MT325626  
MT325627  
MT325628  
MT325629  
MT325630  
MT325631  
MT325632  
MT325633  
MT325634  
MT325635  
MT325636  
MT325637  
MT325638  
MT325639  
MT325640  
MT327745  
MT328032  
MT328033  
MT328034  
MT328035  
MT334523  
MT334526  
MT345802  
MT345816  
MT345868  
MT345869  
MT345870  
MT345873  
MT345874  
MT350263  
MT350264  
MT350265  
MT350266  
MT350267  
MT350268  
MT350269

MT350270  
MT350271  
MT350272  
MT350273  
MT350274  
MT350275  
MT350276  
MT350277  
MT350278  
MT350279  
MT350280  
MT358401  
MT358402  
MT371002  
MT374109  
MT374110  
MT374111  
MT374112  
MT374113  
MT374114  
MT374115  
MT374116  
MT380728  
MT380729  
MT380730  
MT380731  
MT380732  
MT380733  
MT380734  
MT412310  
MT415320  
MT415321  
MT415322  
MT415323  
MT444148  
MT446339  
MT452574  
MT452575  
MT452576  
MT457403  
MT459837  
MT459838  
MT459839  
MT459840  
MT459841  
MT459842  
MT459843  
MT459844  
MT459845  
MT459846  
MT459847  
MT459849  
MT459850  
MT459851  
MT459852  
MT459853  
MT459854  
MT459855  
MT459856  
MT459857  
MT459858  
MT459859  
MT459860  
MT459862  
MT459863  
MT459865  
MT459866  
MT459867  
MT459868  
MT459869

MT459898  
MT459906  
MT459985  
MT459986  
MT459987  
MT459988  
MT459989  
MT459990  
MT460089  
MT460090  
MT460091  
MT460092  
MT460113  
MT460114  
MT460115  
MT460116  
MT460117  
MT460119  
MT460120  
MT460121  
MT460124  
MT460125  
MT460127  
MT460128  
MT460129  
MT460130  
MT460132  
MT460133  
MT460135  
MT460136  
MT460137  
MT460138  
MT460139  
MT460140  
MT466583  
MT477835  
MT477836  
MT477837  
MT477838  
MT477839  
MT477840  
MT477841  
MT477842  
MT477843  
MT477844  
MT477845  
MT477846  
MT477847  
MT477848  
MT477849  
MT477850  
MT477851  
MT477852  
MT477853  
MT477854  
MT477855  
MT477856  
MT477857  
MT477858  
MT477859  
MT477860  
MT477861  
MT477862  
MT477885  
MT477903  
MT477904  
MT483553  
MT483554  
MT483555  
MT483556

MT483557  
MT483558  
MT483559  
MT483560  
MT483563  
MT483702  
MT506707  
MT506888  
MT506889  
MT506891  
MT506892  
MT506894  
MT506896  
MT506897  
MT506899  
MT506900  
MT506902  
MT506903  
MT506904  
MT506905  
MT506907  
MT509452  
MT509453  
MT509454  
MT509455  
MT509456  
MT509457  
MT509458  
MT509459  
MT509460  
MT509461  
MT509462  
MT509463  
MT509464  
MT509465  
MT509466  
MT509467  
MT509468  
MT509471  
MT509472  
MT509474  
MT509475  
MT509477  
MT509480  
MT509486  
MT509488  
MT509489  
MT509490  
MT509491  
MT509492  
MT509493  
MT510718  
MT510719  
MT510721  
MT510722  
MT510725  
MT510726  
MT528598  
MT528599  
MT528600  
MT528601  
MT528602  
MT528603  
MT528604  
MT528605  
MT528606  
MT528607  
MT528608  
MT528609  
MT528610

MT528611  
MT528612  
MT528613  
MT528614  
MT528615  
MT528616  
MT528617  
MT528618  
MT528619  
MT528622  
MT528623  
MT528624  
MT528625  
MT528626  
MT528627  
MT528628  
MT528629  
MT528630  
MT533201  
MT535472  
MT535481  
MT539726  
MT551604  
MT551605  
MT551606  
MT551607  
MT551608  
MT551609  
MT554052  
MT557568  
MT557569  
MT557570  
MT559037  
MT559038  
MT559800  
MT559801  
MT559802  
MT559803  
MT565495  
MT565496  
MT565497  
MT565498  
MT565499  
MT566435  
MT566436  
MT566437  
MT576529  
MT576530  
MT576531  
MT576532  
MT576639  
MT576640  
MT576641  
MT576642  
MT576643  
MT576644  
MT576689  
MT578015  
MT578016  
MT578017  
MT598171  
MT598172  
MT598173  
MT598174  
MT598175  
MT598176  
MT598177  
MT598178  
MT598633  
MT598634

MT598636  
MT598639  
MT598640  
MT598641  
MT598642  
MT601275  
MT601276  
MT601277  
MT601278  
MT601279  
MT601280  
MT601281  
MT601282  
MT601283  
MT601284  
MT601285  
MT601286  
MT601287  
MT601288  
MT601289  
MT601290  
MT601291  
MT601292  
MT601293  
MT601294  
MT601295  
NC\_045512  
NMDC60013002-06  
NMDC60013002-07  
NMDC60013002-08  
NMDC60013002-09  
NMDC60013002-10  
CNA0013697  
CNA0013698  
CNA0013699  
CNA0013700  
CNA0013701  
CNA0013702  
CNA0013703  
CNA0013704  
CNA0013705  
CNA0013708
